# Supplementary material for: A new class of temporarily phenotypic enhancers identified by CRISPR/Cas9-mediated genetic screening
Source: HighWire-hosted journal article supplement (doi:10.1101/gr.197152.115), 2016-01-26
Supplement: Table_S1.xlsx [file Table_S1.xlsx]

## Sheet: Table legend
SUPPLEMENTAL Table S1. A list of candidate regulatory regions (hg18) surveyed in this study. 174 putative cis-regulatory elements with chromatin features of enhancers, CTCF binding and/or DNaseI hypersensitivity are selected and annotated based on the features.

## Sheet: surveyed loci
Candidate regulotry regions			chr6	start	end	size
DHS_1	CTCF_1	-	chr6	30523104	30523282	178
DHS_2	-	-	chr6	30526786	30526969	183
DHS_3	CTCF_2	-	chr6	30529453	30529613	160
DHS_4	-	-	chr6	30539387	30539578	191
DHS_5	-	-	chr6	30540922	30540943	21
DHS_6	CTCF_3	-	chr6	30557906	30558032	126
CTCF_4	-	-	chr6	30559501	30559770	269
DHS_7	Promoter_1	-	chr6	30565107	30565281	174
DHS_8	-	-	chr6	30565662	30565725	63
DHS_9	-	-	chr6	30565900	30566033	133
DHS_10	CTCF_5	-	chr6	30569570	30569721	151
DHS_11	enhancer_1	-	chr6	30590982	30591438	456
DHS_12	-	-	chr6	30591859	30592048	189
DHS_13	-	-	chr6	30592278	30592467	189
CTCF_6	-	-	chr6	30608194	30608543	349
DHS_14	CTCF_7	-	chr6	30617281	30617452	171
DHS_15	-	-	chr6	30617562	30617724	162
DHS_16	-	-	chr6	30618020	30618192	172
DHS_17	CTCF_8	-	chr6	30620464	30620666	202
DHS_18	-	-	chr6	30631263	30631495	232
DHS_19	-	-	chr6	30631987	30632136	149
DHS_20	CTCF_9	-	chr6	30632321	30632488	167
DHS_21	Promoter_2	-	chr6	30632581	30632762	181
DHS_22	-	-	chr6	30632948	30633109	161
DHS_23	Promoter_3	-	chr6	30646954	30647138	184
DHS_24	-	-	chr6	30647399	30647543	144
DHS_25	CTCF_10	-	chr6	30673179	30673338	159
DHS_26	-	-	chr6	30677478	30677668	190
enhancer_2	-	-	chr6	30689785	30690016	231
DHS_27	CTCF_11	-	chr6	30690703	30690864	161
DHS_28	CTCF_12	-	chr6	30691110	30691287	177
DHS_29	-	-	chr6	30691751	30692077	326
DHS_30	Promoter_4	-	chr6	30692856	30693227	371
DHS_31	Promoter_5	-	chr6	30693471	30693887	416
DHS_32	CTCF_13	Promoter_6	chr6	30702521	30702707	186
DHS_33	-	-	chr6	30722205	30722387	182
DHS_34	Promoter_7	-	chr6	30722742	30723726	984
CTCF_14	-	-	chr6	30746485	30746917	432
DHS_35	-	-	chr6	30748456	30748619	163
DHS_36	CTCF_15	Promoter_8	chr6	30748718	30748907	189
DHS_37	CTCF_16	enhancer_3	chr6	30754822	30755216	394
DHS_38	enhancer_4	-	chr6	30757625	30758087	462
DHS_39	enhancer_5	-	chr6	30758283	30758518	235
DHS_40	-	-	chr6	30761764	30761938	174
DHS_41	Promoter_9	-	chr6	30762935	30763085	150
DHS_42	CTCF_17	-	chr6	30763599	30763775	176
DHS_43	-	-	chr6	30766388	30766565	177
DHS_44	-	-	chr6	30776205	30776377	172
DHS_45	CTCF_18	Promoter_10	chr6	30793162	30793347	185
DHS_46	-	-	chr6	30795091	30795242	151
DHS_47	Promoter_11	-	chr6	30795840	30796028	188
DHS_48	-	-	chr6	30796600	30796788	188
DHS_49	CTCF_19	-	chr6	30797144	30797308	164
DHS_50	CTCF_20	-	chr6	30798466	30798623	157
DHS_51	-	-	chr6	30801042	30801062	20
DHS_52	-	-	chr6	30801814	30801941	127
DHS_53	-	-	chr6	30806164	30806334	170
DHS_54	-	-	chr6	30806424	30806601	177
DHS_55	CTCF_21	-	chr6	30806681	30806866	185
weak_CTCF_2	-	-	chr6	30817084	30817104	20
DHS_56	Promoter_12	-	chr6	30817894	30818758	864
DHS_57	CTCF_22	Promoter_13	chr6	30819391	30820487	1096
CTCF_23	-	-	chr6	30822451	30822736	285
DHS_58	-	-	chr6	30835371	30835535	164
enhancer_6	-	-	chr6	30839778	30840009	231
DHS_59	enhancer_7	-	chr6	30845438	30845685	247
DHS_60	-	-	chr6	30857761	30857910	149
DHS_61	CTCF_24	-	chr6	30866445	30866628	183
DHS_62	enhancer_8	-	chr6	30886551	30886691	140
DHS_63	-	-	chr6	30890097	30890250	153
CTCF_25	-	-	chr6	30897878	30898091	213
DHS_64	-	-	chr6	30902859	30903027	168
DHS_65	CTCF_26	enhancer_9	chr6	30904342	30904808	466
DHS_66	CTCF_27	-	chr6	30905579	30905599	20
DHS_67	-	-	chr6	30914192	30914319	127
DHS_68	CTCF_28	enhancer_10	chr6	30919923	30920190	267
DHS_69	-	-	chr6	30921133	30921154	21
DHS_70	-	-	chr6	30923411	30923461	50
DHS_71	-	-	chr6	30923950	30924084	134
enhancer_11	-	-	chr6	30925201	30925366	165
enhancer_12	-	-	chr6	30952080	30952310	230
DHS_72	CTCF_29	enhancer_13	chr6	30953558	30953719	161
enhancer_14	-	-	chr6	30955155	30955182	27
DHS_73	-	-	chr6	30956561	30956745	184
DHS_74	-	-	chr6	30957718	30957881	163
DHS_75	-	-	chr6	30958279	30958417	138
DHS_76	Promoter_14	-	chr6	30958540	30958705	165
DHS_77	Promoter_15	-	chr6	30959507	30959743	236
DHS_78	Promoter_16	-	chr6	30960158	30960344	186
DHS_79	-	-	chr6	30960561	30960745	184
DHS_80	enhancer_15	-	chr6	30961939	30962403	464
DHS_81	CTCF_30	Promoter_17	chr6	30968767	30968921	154
DHS_82	Promoter_18	-	chr6	30983700	30983889	189
DHS_83	Promoter_19	-	chr6	30989612	30989783	171
DHS_84	Promoter_20	-	chr6	30989880	30990067	187
DHS_85	CTCF_31	enhancer_16	chr6	30991340	30991523	183
DHS_86	-	-	chr6	30998148	30998299	151
DHS_87	-	-	chr6	30998439	30998624	185
DHS_88	CTCF_32	enhancer_17	chr6	31018306	31018626	320
DHS_89	-	-	chr6	31031423	31031564	141
CTCF_33	-	-	chr6	31050265	31050539	274
DHS_90	CTCF_34	enhancer_18	chr6	31057703	31058277	574
DHS_91	-	-	chr6	31062099	31062190	91
CTCF_35	-	-	chr6	31084036	31084291	255
DHS_92	CTCF_36	-	chr6	31118616	31118787	171
CTCF_37	-	-	chr6	31120161	31120449	288
CTCF_38	-	-	chr6	31133843	31134467	624
DHS_93	CTCF_39	enhancer_19	chr6	31144721	31144907	186
DHS_94	CTCF_40	enhancer_20	chr6	31146489	31146633	144
enhancer_21	-	-	chr6	31147579	31147615	36
DHS_95	CTCF_41	enhancer_22	chr6	31155593	31155808	215
DHS_96	CTCF_42	enhancer_23	chr6	31159821	31160101	280
DHS_97	CTCF_43	-	chr6	31163362	31163527	165
DHS_98	CTCF_44	-	chr6	31178305	31178388	83
DHS_99	CTCF_45	-	chr6	31186680	31186860	180
DHS_100	-	-	chr6	31190066	31190244	178
DHS_101	Promoter_21	-	chr6	31190362	31190547	185
CTCF_46	-	-	chr6	31190741	31191183	442
DHS_102	CTCF_47	enhancer_24	chr6	31203967	31204310	343
weak_CTCF_1	-	-	chr6	31208728	31209580	852
DHS_103	CTCF_48	enhancer_25	chr6	31213338	31213605	267
DHS_104	enhancer_26	-	chr6	31215149	31215713	564
DHS_105	-	-	chr6	31218119	31218278	159
DHS_106	enhancer_27	-	chr6	31218796	31219084	288
DHS_107	Promoter_22	-	chr6	31233700	31234259	559
DHS_108	-	-	chr6	31234516	31234684	168
DHS_109	CTCF_49	-	chr6	31235180	31235354	174
DHS_110	-	-	chr6	31237345	31237508	163
DHS_111	CTCF_50	enhancer_28	chr6	31238198	31238380	182
DHS_112	-	-	chr6	31244940	31245100	160
OCT4 first intron	-	-	chr6	31245941	31245949	8
DHS_113	Promoter_23	-	chr6	31246404	31246566	162
DHS_114	-	-	chr6	31246892	31246984	92
DHS_115	enhancer_29	-	chr6	31247578	31247920	342
DHS_116	-	-	chr6	31248370	31248539	169
DHS_117	-	-	chr6	31248818	31249007	189
enhancer_30	-	-	chr6	31250307	31250468	161
DHS_118	-	-	chr6	31256188	31256660	472
DHS_119	CTCF_51	enhancer_31	chr6	31268400	31268570	170
DHS_120	CTCF_39	-	chr6	31269038	31269216	178
DHS_120_2	CTCF_52_2		chr6	31272801	31272961	160
DHS_121	Promoter_24	-	chr6	31273527	31273602	75
DHS_121	-	-	chr6	31278398	31278565	167
DHS_122	enhancer_32	-	chr6	31279804	31279902	98
DHS_123	-	-	chr6	31322417	31322438	21
CTCF_54	-	-	chr6	31328534	31328803	269
DHS_124	-	-	chr6	31346997	31347204	207
DHS_125	Promoter_25	-	chr6	31347816	31347962	146
DHS_126	-	-	chr6	31383678	31384184	506
CTCF_55	-	-	chr6	31397659	31397717	58
DHS_127	-	-	chr6	31412978	31412999	21
CTCF_56	-	-	chr6	31420745	31421126	381
DHS_128	Promoter_26	-	chr6	31432905	31433082	177
DHS_129	CTCF_57	enhancer_33	chr6	31442700	31443084	384
CTCF_58	-	-	chr6	31449979	31450000	21
DHS_130	CTCF_59	-	chr6	31472854	31472904	50
DHS_131	CTCF_60	-	chr6	31475510	31475588	78
DHS_132	-	-	chr6	31475846	31475913	67
DHS_133	-	-	chr6	31476378	31476409	31
enhancer_34	-	-	chr6	31478315	31478335	20
DHS_134	-	-	chr6	31478781	31478816	35
DHS_135	DHS_135	-	chr6	31478969	31479234	265
DHS_135	Promoter_27	-	chr6	31479227	31479522	295
DHS_136	CTCF_61	enhancer_35	chr6	31517489	31517697	208
DHS_137	CTCF_62	-	chr6	31518340	31518506	166
DHS_138	Promoter_28	-	chr6	31538767	31538943	176
DHS_139	CTCF_63	-	chr6	31550747	31550923	176
CTCF_64	-	-	chr6	31567881	31568382	501
DHS_140	CTCF_65	-	chr6	31569567	31569797	230
DHS_141	-	-	chr6	31569930	31570314	384
DHS_142	-	-	chr6	31570847	31570895	48
DHS_143	Promoter_29	-	chr6	31573428	31573583	155
DHS_144	Promoter_30	-	chr6	31573740	31573881	141
DHS_145	-	-	chr6	31574560	31574700	140
