# Supplementary material for: A new class of temporarily phenotypic enhancers identified by CRISPR/Cas9-mediated genetic screening
Source: HighWire-hosted journal article supplement (doi:10.1101/gr.197152.115), 2016-01-26
Supplement: Table_S2.xlsx [file Table_S2.xlsx]

## Sheet: Table legend
SUPPLEMENTAL Table S2. A list of sgRNA library sequences designed for lentiCRISPR screening. We designed 1,964 sgRNA sequences targeting these putative cis-regulatory elements with an average of 11 sgRNA per element (regulatory-gDNA sequence). As negative controls, we also designed 1,415 ineffective sgRNA sequences that complement sequences in the 174 elements but lack a NGG/NCG protospacer adjac…

## Sheet: regulatory-gDNA sequences
strand	chr	start	seq	Candidate regulatory regions
+	chr6	30523104	GATAGAAAATCCATTGGACT	DHS_1	CTCF_1	-
+	chr6	30523140	GTGTATTCCCGATCTCACCAC	DHS_1	CTCF_1	-
+	chr6	30523143	GATTCCCGATCTCACCACTGG	DHS_1	CTCF_1	-
+	chr6	30523144	GTTCCCGATCTCACCACTGGA	DHS_1	CTCF_1	-
-	chr6	30523146	GCCCGATCTCACCACTGGAGG	DHS_1	CTCF_1	-
+	chr6	30523147	GCCGATCTCACCACTGGAGGG	DHS_1	CTCF_1	-
+	chr6	30523150	GATCTCACCACTGGAGGGAGG	DHS_1	CTCF_1	-
+	chr6	30523151	GTCTCACCACTGGAGGGAGGT	DHS_1	CTCF_1	-
+	chr6	30523173	GAGAGGCATATGAGTGAGTG	DHS_1	CTCF_1	-
+	chr6	30523230	GTTGCCCTGCAGATTCTCACC	DHS_1	CTCF_1	-
+	chr6	30523231	GTGCCCTGCAGATTCTCACCA	DHS_1	CTCF_1	-
+	chr6	30523262	GAAGCCCAGAGGGCACCCCAG	DHS_1	CTCF_1	-
+	chr6	30526805	GAGCTGCAACTTGTTTTCCG	DHS_2	-	-
+	chr6	30526818	GTTTTCCGCGGCTTGTAGTCG	DHS_2	-	-
+	chr6	30526821	GTCCGCGGCTTGTAGTCGAGG	DHS_2	-	-
+	chr6	30526832	GTAGTCGAGGAGGAGCCCACG	DHS_2	-	-
+	chr6	30526873	GCCAAGCGCGCTCCCGCCCAG	DHS_2	-	-
+	chr6	30526876	GAGCGCGCTCCCGCCCAGCGG	DHS_2	-	-
+	chr6	30526921	GCTGCTTCTCTCCGAGGCTCG	DHS_2	-	-
+	chr6	30526949	GAAACCTTCCGCTCCGAATG	DHS_2	-	-
+	chr6	30529453	GGAGGAAACATCTGTACTCC	DHS_3	CTCF_2	-
+	chr6	30529473	GAGGATTTAGAGACACCGACA	DHS_3	CTCF_2	-
+	chr6	30529474	GGATTTAGAGACACCGACAC	DHS_3	CTCF_2	-
+	chr6	30529480	GAGAGACACCGACACGGGAGC	DHS_3	CTCF_2	-
+	chr6	30529481	GAGACACCGACACGGGAGCA	DHS_3	CTCF_2	-
+	chr6	30529529	GTCTGCAGCTGGAAACCGAAC	DHS_3	CTCF_2	-
+	chr6	30529538	GGAAACCGAACGGGACCCTG	DHS_3	CTCF_2	-
+	chr6	30529547	GACGGGACCCTGTGGAAGTCG	DHS_3	CTCF_2	-
+	chr6	30529548	GCGGGACCCTGTGGAAGTCGC	DHS_3	CTCF_2	-
+	chr6	30529551	GACCCTGTGGAAGTCGCGGG	DHS_3	CTCF_2	-
+	chr6	30529552	GACCCTGTGGAAGTCGCGGGT	DHS_3	CTCF_2	-
-	chr6	30529553	GCCCTGTGGAAGTCGCGGGTG	DHS_3	CTCF_2	-
+	chr6	30529563	GTCGCGGGTGGGGAAGCGAA	DHS_3	CTCF_2	-
+	chr6	30529564	GTCGCGGGTGGGGAAGCGAAA	DHS_3	CTCF_2	-
+	chr6	30529592	GAGCGTCTGTCCTCAGTCCT	DHS_3	CTCF_2	-
+	chr6	30529593	GAGCGTCTGTCCTCAGTCCTT	DHS_3	CTCF_2	-
+	chr6	30539387	GAGTACACTAAGTACAATAAA	DHS_4	-	-
+	chr6	30539396	GAGTACAATAAATGGTAAACT	DHS_4	-	-
+	chr6	30539454	GTAATAATATTAGTACTAAG	DHS_4	-	-
+	chr6	30539488	GAAACCGCAAACCGCAGCCA	DHS_4	-	-
+	chr6	30539494	GCAAACCGCAGCCATGGCAG	DHS_4	-	-
+	chr6	30539516	GAACCTCAGCTTAAATAGTG	DHS_4	-	-
+	chr6	30539521	GTCAGCTTAAATAGTGTGGAG	DHS_4	-	-
+	chr6	30539528	GAAATAGTGTGGAGCGGCCAC	DHS_4	-	-
+	chr6	30539537	GGAGCGGCCACTGGTTTCCG	DHS_4	-	-
-	chr6	30539547	GCTACGAGCCGCGGAAACCAG	DHS_4	-	-
-	chr6	30539557	GCGGGCGCGACTACGAGCCG	DHS_4	-	-
+	chr6	30539558	GGCTCGTAGTCGCGCCCGCG	DHS_4	-	-
-	chr6	30557906	GCCCTGTTCTGCCGAGATCCG	DHS_6	CTCF_3	-
+	chr6	30557907	GCCTGTTCTGCCGAGATCCGA	DHS_6	CTCF_3	-
+	chr6	30557908	GCTGTTCTGCCGAGATCCGAA	DHS_6	CTCF_3	-
+	chr6	30557909	GTGTTCTGCCGAGATCCGAAG	DHS_6	CTCF_3	-
-	chr6	30557916	GCCGAGATCCGAAGGGGAACC	DHS_6	CTCF_3	-
+	chr6	30557917	GCGAGATCCGAAGGGGAACCT	DHS_6	CTCF_3	-
+	chr6	30557918	GAGATCCGAAGGGGAACCTG	DHS_6	CTCF_3	-
+	chr6	30557932	GAACCTGGGGAGGTCCCAGAT	DHS_6	CTCF_3	-
+	chr6	30557973	GGTGTCTCTCCTCAGTCCTT	DHS_6	CTCF_3	-
+	chr6	30558004	GGCCGCTGCCGCTCTACGCT	DHS_6	CTCF_3	-
+	chr6	30558005	GCCGCTGCCGCTCTACGCTT	DHS_6	CTCF_3	-
+	chr6	30559501	GTCGACCCTTTAAAAGCTGTT	CTCF_4	-	-
+	chr6	30559502	GCGACCCTTTAAAAGCTGTTT	CTCF_4	-	-
+	chr6	30559601	GAATAAACAAAATTGCCATTA	CTCF_4	-	-
+	chr6	30559602	GATAAACAAAATTGCCATTAG	CTCF_4	-	-
+	chr6	30559628	GCACCAGTCTCAAGAAAAATC	CTCF_4	-	-
+	chr6	30559749	GAGCCTCTACCATTTCCTCAC	CTCF_4	-	-
+	chr6	30559750	GCCTCTACCATTTCCTCACA	CTCF_4	-	-
+	chr6	30565107	GTTCCCGTTCCTCTCGTAACC	DHS_7	Promoter_1	-
+	chr6	30565229	GCCGACTATAAAGTCCCCATC	DHS_7	Promoter_1	-
+	chr6	30565247	GTCCGGACTCAAGAAGTTCTC	DHS_7	Promoter_1	-
+	chr6	30565260	GAGTTCTCAGGACTCAGAGGC	DHS_7	Promoter_1	-
+	chr6	30565261	GTTCTCAGGACTCAGAGGCT	DHS_7	Promoter_1	-
-	chr6	30565662	GCCGGGAGACACGGAGCGCCA	DHS_8	-	-
+	chr6	30565705	GTGAATCTGCGGACGCTGCG	DHS_8	-	-
+	chr6	30565900	GACCCGGTTCTTTTTCAGTTT	DHS_9	-	-
+	chr6	30565916	GTTTAGGCCAAAATGCCCAC	DHS_9	-	-
+	chr6	30565917	GTTTAGGCCAAAATGCCCACA	DHS_9	-	-
+	chr6	30565923	GCCAAAATGCCCACAGGGTGG	DHS_9	-	-
+	chr6	30565929	GTGCCCACAGGGTGGTGGCGA	DHS_9	-	-
+	chr6	30565930	GCCCACAGGGTGGTGGCGAC	DHS_9	-	-
+	chr6	30565931	GCCCACAGGGTGGTGGCGACG	DHS_9	-	-
+	chr6	30565932	GCCACAGGGTGGTGGCGACGG	DHS_9	-	-
+	chr6	30565942	GTGGCGACGGGGGCGGGGCT	DHS_9	-	-
+	chr6	30565961	GTTGGTGGGCGGGACTGACTA	DHS_9	-	-
+	chr6	30565962	GTGGTGGGCGGGACTGACTAA	DHS_9	-	-
+	chr6	30565963	GGTGGGCGGGACTGACTAAG	DHS_9	-	-
+	chr6	30565966	GGGCGGGACTGACTAAGGGG	DHS_9	-	-
+	chr6	30565967	GGCGGGACTGACTAAGGGGC	DHS_9	-	-
+	chr6	30565968	GCGGGACTGACTAAGGGGCG	DHS_9	-	-
+	chr6	30565973	GACTGACTAAGGGGCGGGGCC	DHS_9	-	-
+	chr6	30565974	GCTGACTAAGGGGCGGGGCCA	DHS_9	-	-
+	chr6	30566000	GCACACCCTGCAGTGGATGCA	DHS_9	-	-
+	chr6	30566011	GTGGATGCATGGCTGCGAGC	DHS_9	-	-
+	chr6	30566012	GTGGATGCATGGCTGCGAGCT	DHS_9	-	-
+	chr6	30566013	GGATGCATGGCTGCGAGCTG	DHS_9	-	-
-	chr6	30569575	GCCACAGGAGAGAGTGCCTTG	DHS_10	CTCF_5	-
+	chr6	30569583	GAGAGTGCCTTGTGGAGCGC	DHS_10	CTCF_5	-
+	chr6	30569584	GAGAGTGCCTTGTGGAGCGCT	DHS_10	CTCF_5	-
+	chr6	30569607	GAGCAGGACCTGACCACCACC	DHS_10	CTCF_5	-
+	chr6	30569652	GGCAGCATGCAGCGCCCCCT	DHS_10	CTCF_5	-
+	chr6	30569653	GCAGCATGCAGCGCCCCCTT	DHS_10	CTCF_5	-
+	chr6	30569664	GCGCCCCCTTGGGAAAGCTTT	DHS_10	CTCF_5	-
+	chr6	30569699	GACCCATTCGAGCAGCCACGT	DHS_10	CTCF_5	-
+	chr6	30590982	GAAATACGGCTACTCCTCAA	DHS_11	enhancer_1	-
+	chr6	30590986	GTACGGCTACTCCTCAAAGGA	DHS_11	enhancer_1	-
+	chr6	30590991	GCTACTCCTCAAAGGAAGGCT	DHS_11	enhancer_1	-
-	chr6	30591032	GCCTAGTCGTAGTTCTTCACA	DHS_11	enhancer_1	-
+	chr6	30591033	GCTAGTCGTAGTTCTTCACAG	DHS_11	enhancer_1	-
+	chr6	30591034	GTAGTCGTAGTTCTTCACAGA	DHS_11	enhancer_1	-
-	chr6	30591103	GCCCACAGAGCAAGACAAAAG	DHS_11	enhancer_1	-
+	chr6	30591116	GACAAAAGAAGCCGGCAAGGA	DHS_11	enhancer_1	-
+	chr6	30591122	GAAGCCGGCAAGGATGGCTC	DHS_11	enhancer_1	-
-	chr6	30591126	GCCGGCAAGGATGGCTCTGGT	DHS_11	enhancer_1	-
+	chr6	30591282	GATCCCTACCAACCCACTGC	DHS_11	enhancer_1	-
+	chr6	30591303	GGCATATGAGCCCTAAAATC	DHS_11	enhancer_1	-
+	chr6	30591304	GCATATGAGCCCTAAAATCT	DHS_11	enhancer_1	-
+	chr6	30591309	GTGAGCCCTAAAATCTGGGAA	DHS_11	enhancer_1	-
+	chr6	30591323	GTGGGAAAGGCTTTTTTCCCT	DHS_11	enhancer_1	-
+	chr6	30591324	GGGAAAGGCTTTTTTCCCTA	DHS_11	enhancer_1	-
+	chr6	30591325	GGAAAGGCTTTTTTCCCTAG	DHS_11	enhancer_1	-
-	chr6	30591339	GCCCTAGGGGCCCTGGCCTCA	DHS_11	enhancer_1	-
-	chr6	30591349	GCCTGGCCTCACAGACTTGCC	DHS_11	enhancer_1	-
+	chr6	30591350	GCTGGCCTCACAGACTTGCCC	DHS_11	enhancer_1	-
+	chr6	30591376	GTAAATTCTCAGTGGCTCAG	DHS_11	enhancer_1	-
+	chr6	30591399	GCACGTGCCTCACGTCCTCAC	DHS_11	enhancer_1	-
+	chr6	30591886	GCGCAACAACTTCTCCCGCTC	DHS_12	-	-
-	chr6	30591900	GCCGCTCAGGTTACCCTCAGA	DHS_12	-	-
+	chr6	30591907	GGTTACCCTCAGAAAGGCTA	DHS_12	-	-
+	chr6	30591914	GCTCAGAAAGGCTATGGACCC	DHS_12	-	-
-	chr6	30591943	GCCCCAGATTGCATAACAACT	DHS_12	-	-
+	chr6	30591944	GCCCAGATTGCATAACAACTG	DHS_12	-	-
+	chr6	30591945	GCCAGATTGCATAACAACTGA	DHS_12	-	-
+	chr6	30591946	GCAGATTGCATAACAACTGAG	DHS_12	-	-
+	chr6	30591949	GATTGCATAACAACTGAGGGG	DHS_12	-	-
+	chr6	30591950	GTTGCATAACAACTGAGGGGT	DHS_12	-	-
+	chr6	30591968	GTGGGTCCCTATTTCCTCTC	DHS_12	-	-
+	chr6	30591969	GTGGGTCCCTATTTCCTCTCT	DHS_12	-	-
+	chr6	30591993	GTCTGTAGCCAATCATTCACG	DHS_12	-	-
-	chr6	30592000	GCCAATCATTCACGAGGTAAA	DHS_12	-	-
+	chr6	30592278	GCGGCTCTGTCCCTGTTTCC	DHS_13	-	-
+	chr6	30592283	GTCTGTCCCTGTTTCCTGGAT	DHS_13	-	-
+	chr6	30592311	GACGTCTGTATCTTGTATCAC	DHS_13	-	-
+	chr6	30592314	GTCTGTATCTTGTATCACAGG	DHS_13	-	-
+	chr6	30592335	GGCACCTTCTTCCTGTTTCC	DHS_13	-	-
-	chr6	30592383	GCCCGCCTCCGCCCACAGCGT	DHS_13	-	-
+	chr6	30592392	GCCCACAGCGTAAGCCGCGC	DHS_13	-	-
+	chr6	30592447	GAGTAACCGCCTTCAGTTTCC	DHS_13	-	-
+	chr6	30608203	GTCCCACCGCCTTGCTGTGGC	CTCF_6	-	-
+	chr6	30608204	GCCCACCGCCTTGCTGTGGCA	CTCF_6	-	-
-	chr6	30608208	GCCGCCTTGCTGTGGCAGGGA	CTCF_6	-	-
+	chr6	30608291	GTCCAAACCTCATTATAGCCC	CTCF_6	-	-
-	chr6	30608421	GCCTCTAGTGTGCAAAAAAGT	CTCF_6	-	-
+	chr6	30608436	GAAAGTAAGTACAAGAATTTT	CTCF_6	-	-
+	chr6	30608437	GAAGTAAGTACAAGAATTTTT	CTCF_6	-	-
+	chr6	30608438	GAGTAAGTACAAGAATTTTTG	CTCF_6	-	-
+	chr6	30617281	GTAGCAACTCCATGATTCCA	DHS_14	CTCF_7	-
+	chr6	30617294	GATTCCAAGGTAATTTAAAC	DHS_14	CTCF_7	-
+	chr6	30617363	GCTGCAGTGATGCTACGACAC	DHS_14	CTCF_7	-
+	chr6	30617370	GATGCTACGACACCGGCAGA	DHS_14	CTCF_7	-
+	chr6	30617397	GCAAAGCTTCTCAAATGCAG	DHS_14	CTCF_7	-
+	chr6	30617398	GCAAAGCTTCTCAAATGCAGC	DHS_14	CTCF_7	-
+	chr6	30617416	GCGGGAAGTCCATTTACCAA	DHS_14	CTCF_7	-
-	chr6	30617600	GCCTCCTGTGACAGAAGCCAC	DHS_15	-	-
+	chr6	30617614	GAGCCACCGGCGCCTGCCTGA	DHS_15	-	-
-	chr6	30617679	GCCAAGGTTTGTTTCATCACT	DHS_15	-	-
+	chr6	30618070	GCTTCATCACACCACGTTACT	DHS_16	-	-
+	chr6	30620494	GTCCTTTGCTCCTTGGTTAAC	DHS_17	CTCF_8	-
-	chr6	30620495	GCCTTTGCTCCTTGGTTAACA	DHS_17	CTCF_8	-
-	chr6	30620544	GCCCAGTGACTCAGATCCTGA	DHS_17	CTCF_8	-
+	chr6	30620545	GCCAGTGACTCAGATCCTGAA	DHS_17	CTCF_8	-
+	chr6	30620646	GTCATCCAATACAGACAACAC	DHS_17	CTCF_8	-
+	chr6	30631263	GTCCGGGTAGGCGGGAAAGCC	DHS_18	-	-
+	chr6	30631310	GCGATTTGGGTCGTAGCCTCG	DHS_18	-	-
+	chr6	30631328	GCGTGGACCCAGCCCCTGAGA	DHS_18	-	-
-	chr6	30631335	GCCAGCCCCTGAGAAGGCTGC	DHS_18	-	-
-	chr6	30631340	GCCCTGAGAAGGCTGCTGGTT	DHS_18	-	-
+	chr6	30631347	GAAGGCTGCTGGTTAAGCCTG	DHS_18	-	-
+	chr6	30631356	GGTTAAGCCTGCGGATATGA	DHS_18	-	-
+	chr6	30631357	GTTAAGCCTGCGGATATGAT	DHS_18	-	-
-	chr6	30631363	GCCTGCGGATATGATGGGTCA	DHS_18	-	-
+	chr6	30631378	GGTCACAGACTCCCCGTCCG	DHS_18	-	-
+	chr6	30631384	GAGACTCCCCGTCCGAGGTGT	DHS_18	-	-
+	chr6	30631407	GTCTGTTCCTCTCGCCGCTCC	DHS_18	-	-
+	chr6	30631419	GCCGCTCCCGGCTCCCGCTG	DHS_18	-	-
-	chr6	30631426	GCCGGCTCCCGCTGCGGCTGT	DHS_18	-	-
-	chr6	30631432	GCCCGCTGCGGCTGTTGGAAC	DHS_18	-	-
+	chr6	30631459	GCAGCCCATCTTGAAGCCCTG	DHS_18	-	-
+	chr6	30631460	GAGCCCATCTTGAAGCCCTGC	DHS_18	-	-
+	chr6	30631461	GCCCATCTTGAAGCCCTGCG	DHS_18	-	-
-	chr6	30631463	GCCATCTTGAAGCCCTGCGGG	DHS_18	-	-
+	chr6	30631464	GCATCTTGAAGCCCTGCGGGG	DHS_18	-	-
+	chr6	30631465	GATCTTGAAGCCCTGCGGGGA	DHS_18	-	-
+	chr6	30631466	GTCTTGAAGCCCTGCGGGGAG	DHS_18	-	-
+	chr6	30632002	GCGCCTCAACTGACTGCCCCC	DHS_19	-	-
+	chr6	30632003	GCCTCAACTGACTGCCCCCC	DHS_19	-	-
+	chr6	30632038	GCAGGGGCCCGGGACCCTAG	DHS_19	-	-
+	chr6	30632041	GGGGCCCGGGACCCTAGAGG	DHS_19	-	-
+	chr6	30632044	GCCCGGGACCCTAGAGGAGG	DHS_19	-	-
-	chr6	30632045	GCCCGGGACCCTAGAGGAGGC	DHS_19	-	-
-	chr6	30632046	GCCGGGACCCTAGAGGAGGCG	DHS_19	-	-
-	chr6	30632053	GCCTAGAGGAGGCGGGGCTAG	DHS_19	-	-
+	chr6	30632054	GCTAGAGGAGGCGGGGCTAGC	DHS_19	-	-
+	chr6	30632066	GGGCTAGCAGGTGACGTCAG	DHS_19	-	-
+	chr6	30632067	GGCTAGCAGGTGACGTCAGC	DHS_19	-	-
+	chr6	30632070	GTAGCAGGTGACGTCAGCGGG	DHS_19	-	-
+	chr6	30632071	GAGCAGGTGACGTCAGCGGGC	DHS_19	-	-
+	chr6	30632093	GCCCGACAGAATTACCGCCG	DHS_19	-	-
+	chr6	30632096	GCGACAGAATTACCGCCGCGG	DHS_19	-	-
+	chr6	30632102	GAATTACCGCCGCGGCGGCGA	DHS_19	-	-
+	chr6	30632106	GACCGCCGCGGCGGCGATGGA	DHS_19	-	-
+	chr6	30632116	GCGGCGATGGAAGGCGGACGG	DHS_19	-	-
+	chr6	30632321	GTCATCACTACCTTGCGCTCC	DHS_20	CTCF_9	-
+	chr6	30632322	GCATCACTACCTTGCGCTCCC	DHS_20	CTCF_9	-
+	chr6	30632342	GGGAGAACCTACCACTCACC	DHS_20	CTCF_9	-
+	chr6	30632346	GAACCTACCACTCACCTGGA	DHS_20	CTCF_9	-
+	chr6	30632347	GAACCTACCACTCACCTGGAG	DHS_20	CTCF_9	-
+	chr6	30632348	GACCTACCACTCACCTGGAGG	DHS_20	CTCF_9	-
+	chr6	30632351	GTACCACTCACCTGGAGGGGG	DHS_20	CTCF_9	-
+	chr6	30632354	GCACTCACCTGGAGGGGGCGG	DHS_20	CTCF_9	-
+	chr6	30632381	GAGGGCGGGGCCTACTACCT	DHS_20	CTCF_9	-
+	chr6	30632382	GAGGGCGGGGCCTACTACCTA	DHS_20	CTCF_9	-
+	chr6	30632383	GGGCGGGGCCTACTACCTAG	DHS_20	CTCF_9	-
+	chr6	30632389	GGCCTACTACCTAGGGGAGA	DHS_20	CTCF_9	-
+	chr6	30632390	GCCTACTACCTAGGGGAGAG	DHS_20	CTCF_9	-
-	chr6	30632391	GCCTACTACCTAGGGGAGAGG	DHS_20	CTCF_9	-
+	chr6	30632396	GTACCTAGGGGAGAGGGGGCG	DHS_20	CTCF_9	-
+	chr6	30632426	GAGGCTATACTACAAAGCCC	DHS_20	CTCF_9	-
+	chr6	30632427	GAGGCTATACTACAAAGCCCC	DHS_20	CTCF_9	-
+	chr6	30632441	GAGCCCCGGGCTTGACCTTAG	DHS_20	CTCF_9	-
-	chr6	30632445	GCCGGGCTTGACCTTAGTGGA	DHS_20	CTCF_9	-
+	chr6	30632462	GGAAAGCCGAGACTGCGTCC	DHS_20	CTCF_9	-
+	chr6	30632581	GTGGGAACGATGATAAGGAGC	DHS_21	Promoter_2	-
+	chr6	30632607	GACAGATCATAAGTGCAAAAG	DHS_21	Promoter_2	-
+	chr6	30632608	GCAGATCATAAGTGCAAAAGC	DHS_21	Promoter_2	-
+	chr6	30632616	GAAGTGCAAAAGCGGGCGAGA	DHS_21	Promoter_2	-
+	chr6	30632617	GAGTGCAAAAGCGGGCGAGAA	DHS_21	Promoter_2	-
+	chr6	30632629	GGCGAGAAGGGAAACCCAAG	DHS_21	Promoter_2	-
+	chr6	30632630	GCGAGAAGGGAAACCCAAGC	DHS_21	Promoter_2	-
+	chr6	30632636	GAGGGAAACCCAAGCGGGACA	DHS_21	Promoter_2	-
-	chr6	30632644	GCCAAGCGGGACAAGGACTTT	DHS_21	Promoter_2	-
+	chr6	30632645	GCAAGCGGGACAAGGACTTTT	DHS_21	Promoter_2	-
+	chr6	30632646	GAAGCGGGACAAGGACTTTTG	DHS_21	Promoter_2	-
+	chr6	30632647	GAGCGGGACAAGGACTTTTGG	DHS_21	Promoter_2	-
+	chr6	30632648	GCGGGACAAGGACTTTTGGG	DHS_21	Promoter_2	-
+	chr6	30632651	GGACAAGGACTTTTGGGGGG	DHS_21	Promoter_2	-
+	chr6	30632658	GACTTTTGGGGGGAGGTCAA	DHS_21	Promoter_2	-
+	chr6	30632659	GACTTTTGGGGGGAGGTCAAA	DHS_21	Promoter_2	-
+	chr6	30632699	GAGCTGTTACCATAGTAACCG	DHS_21	Promoter_2	-
+	chr6	30632704	GTTACCATAGTAACCGAGGAC	DHS_21	Promoter_2	-
+	chr6	30632710	GTAGTAACCGAGGACCGGATG	DHS_21	Promoter_2	-
+	chr6	30632721	GACCGGATGTGGCGATCTTA	DHS_21	Promoter_2	-
+	chr6	30632742	GGTGCGACAGTCCTCTTCTC	DHS_21	Promoter_2	-
+	chr6	30632955	GAGATGTTCTCCGCAACCTTC	DHS_22	-	-
+	chr6	30632961	GTCTCCGCAACCTTCCGGAAG	DHS_22	-	-
+	chr6	30632966	GCAACCTTCCGGAAGTGGAA	DHS_22	-	-
+	chr6	30632969	GACCTTCCGGAAGTGGAATGG	DHS_22	-	-
-	chr6	30632970	GCCTTCCGGAAGTGGAATGGC	DHS_22	-	-
+	chr6	30633002	GATTGCTGCCCACCGACCCCC	DHS_22	-	-
+	chr6	30633008	GCCCACCGACCCCCCGGAAG	DHS_22	-	-
+	chr6	30646954	GTTGAGTCTCGCGGCGTCGGG	DHS_23	Promoter_3	-
-	chr6	30646955	GTCCCGACGCCGCGAGACTCA	DHS_23	Promoter_3	-
+	chr6	30646960	GCTCGCGGCGTCGGGAGGTCA	DHS_23	Promoter_3	-
+	chr6	30646967	GCGTCGGGAGGTCACGGCGTC	DHS_23	Promoter_3	-
+	chr6	30647008	GACGCCATGTGTTTACGCGAC	DHS_23	Promoter_3	-
+	chr6	30647017	GTTTACGCGACTGGAGCAAG	DHS_23	Promoter_3	-
+	chr6	30647024	GCGACTGGAGCAAGCGGACGC	DHS_23	Promoter_3	-
-	chr6	30647043	GCCGGCCCCGCTCCGTCATTG	DHS_23	Promoter_3	-
+	chr6	30647044	GCGGCCCCGCTCCGTCATTGC	DHS_23	Promoter_3	-
+	chr6	30647065	GGCCACGCCTCCACTGAACC	DHS_23	Promoter_3	-
+	chr6	30647066	GCCACGCCTCCACTGAACCA	DHS_23	Promoter_3	-
+	chr6	30647086	GGGCCACGCCCCCGAGATGA	DHS_23	Promoter_3	-
+	chr6	30647111	GAAGCTCGCACGTGCGCAGCC	DHS_23	Promoter_3	-
+	chr6	30647112	GAGCTCGCACGTGCGCAGCCC	DHS_23	Promoter_3	-
+	chr6	30647113	GCTCGCACGTGCGCAGCCCG	DHS_23	Promoter_3	-
+	chr6	30647114	GCTCGCACGTGCGCAGCCCGG	DHS_23	Promoter_3	-
+	chr6	30647117	GCACGTGCGCAGCCCGGGGG	DHS_23	Promoter_3	-
+	chr6	30647118	GCACGTGCGCAGCCCGGGGGC	DHS_23	Promoter_3	-
+	chr6	30647399	GCGAGACTGACCGGGCCCCTG	DHS_24	-	-
+	chr6	30647400	GAGACTGACCGGGCCCCTGC	DHS_24	-	-
+	chr6	30647424	GTTACTGCGCATGCGTGCCG	DHS_24	-	-
+	chr6	30647425	GTTACTGCGCATGCGTGCCGT	DHS_24	-	-
+	chr6	30647430	GCGCATGCGTGCCGTGGGCC	DHS_24	-	-
+	chr6	30647431	GCGCATGCGTGCCGTGGGCCC	DHS_24	-	-
+	chr6	30647434	GATGCGTGCCGTGGGCCCGGG	DHS_24	-	-
+	chr6	30647444	GTGGGCCCGGGAGGAGTTTGC	DHS_24	-	-
+	chr6	30647445	GGGCCCGGGAGGAGTTTGCC	DHS_24	-	-
+	chr6	30647446	GGCCCGGGAGGAGTTTGCCG	DHS_24	-	-
-	chr6	30647448	GCCCGGGAGGAGTTTGCCGGG	DHS_24	-	-
+	chr6	30647449	GCCGGGAGGAGTTTGCCGGGG	DHS_24	-	-
+	chr6	30647454	GAGGAGTTTGCCGGGGAGGAG	DHS_24	-	-
+	chr6	30647455	GGAGTTTGCCGGGGAGGAGT	DHS_24	-	-
+	chr6	30647460	GTTGCCGGGGAGGAGTGGGTT	DHS_24	-	-
+	chr6	30647466	GGGAGGAGTGGGTTTGGAAT	DHS_24	-	-
+	chr6	30647475	GGGTTTGGAATCGGGGTTAA	DHS_24	-	-
-	chr6	30647506	GCCAGATGTCGCACGTGACCT	DHS_24	-	-
+	chr6	30647515	GCACGTGACCTAAGTGAGAC	DHS_24	-	-
+	chr6	30647516	GCACGTGACCTAAGTGAGACT	DHS_24	-	-
+	chr6	30673179	GACCAAGCCTGGGCAAGGGGA	DHS_25	CTCF_10	-
+	chr6	30673214	GCTTTGGGCCTACATGCAGTG	DHS_25	CTCF_10	-
+	chr6	30673255	GAACATTGTTGCCCCCTCATG	DHS_25	CTCF_10	-
+	chr6	30673292	GACAGCTGAGACACGTATTCC	DHS_25	CTCF_10	-
+	chr6	30673293	GCAGCTGAGACACGTATTCCA	DHS_25	CTCF_10	-
-	chr6	30673310	GCCAGGGCAGTGTAGCAGCCT	DHS_25	CTCF_10	-
+	chr6	30673317	GAGTGTAGCAGCCTCAGCAAC	DHS_25	CTCF_10	-
+	chr6	30673318	GTGTAGCAGCCTCAGCAACT	DHS_25	CTCF_10	-
+	chr6	30677502	GTGTCTTTCAGAGACAATCTT	DHS_26	-	-
+	chr6	30677503	GTCTTTCAGAGACAATCTTG	DHS_26	-	-
+	chr6	30677509	GCAGAGACAATCTTGGGGATT	DHS_26	-	-
+	chr6	30677512	GAGACAATCTTGGGGATTTGG	DHS_26	-	-
+	chr6	30677547	GTAGGAACTGCTATGCATACT	DHS_26	-	-
+	chr6	30677562	GATACTAGGACATCAAAGAGA	DHS_26	-	-
+	chr6	30677563	GTACTAGGACATCAAAGAGAC	DHS_26	-	-
+	chr6	30677628	GCCACTCCCCAAAAGCTTGTA	DHS_26	-	-
+	chr6	30677629	GCACTCCCCAAAAGCTTGTAT	DHS_26	-	-
+	chr6	30677641	GCTTGTATGGGACAACCAAA	DHS_26	-	-
+	chr6	30677648	GTGGGACAACCAAAAGGCATA	DHS_26	-	-
+	chr6	30689789	GAACCTCCACGCTTCAGTGC	enhancer_2	-	-
+	chr6	30689891	GACCCAATACCACCCTCAGAT	enhancer_2	-	-
+	chr6	30689892	GCCCAATACCACCCTCAGATA	enhancer_2	-	-
+	chr6	30689897	GTACCACCCTCAGATAGGGCA	enhancer_2	-	-
+	chr6	30689996	GTTTAGGAATTTCTTTTAGAA	enhancer_2	-	-
+	chr6	30690703	GTCCCTAGCAGCAACGAGCAC	DHS_27	CTCF_11	-
+	chr6	30690726	GCAGTGCAAAAGCATCTGCTC	DHS_27	CTCF_11	-
+	chr6	30690728	GTGCAAAAGCATCTGCTCAG	DHS_27	CTCF_11	-
+	chr6	30690786	GCTGATTACATCACCTTTCA	DHS_27	CTCF_11	-
+	chr6	30690816	GTCCCACTTGACCAAGTTTCT	DHS_27	CTCF_11	-
+	chr6	30690817	GCCCACTTGACCAAGTTTCTA	DHS_27	CTCF_11	-
+	chr6	30690820	GACTTGACCAAGTTTCTAGGG	DHS_27	CTCF_11	-
+	chr6	30690833	GTCTAGGGCGGCCCTAAGCTC	DHS_27	CTCF_11	-
+	chr6	30690837	GGGCGGCCCTAAGCTCAGGA	DHS_27	CTCF_11	-
-	chr6	30690843	GCCCTAAGCTCAGGATGGCAA	DHS_27	CTCF_11	-
+	chr6	30690844	GCCTAAGCTCAGGATGGCAAA	DHS_27	CTCF_11	-
+	chr6	30691110	GGGAAGAACTGAATTTGCAA	DHS_28	CTCF_12	-
+	chr6	30691113	GAAGAACTGAATTTGCAACGG	DHS_28	CTCF_12	-
+	chr6	30691122	GATTTGCAACGGAGGTTCAAC	DHS_28	CTCF_12	-
-	chr6	30691155	GCCACCCCCATCCTCCCTATA	DHS_28	CTCF_12	-
+	chr6	30691156	GCACCCCCATCCTCCCTATAG	DHS_28	CTCF_12	-
+	chr6	30691157	GACCCCCATCCTCCCTATAGA	DHS_28	CTCF_12	-
+	chr6	30691162	GCATCCTCCCTATAGAGGGAA	DHS_28	CTCF_12	-
+	chr6	30691163	GATCCTCCCTATAGAGGGAAA	DHS_28	CTCF_12	-
+	chr6	30691168	GCCCTATAGAGGGAAAGGGGG	DHS_28	CTCF_12	-
+	chr6	30691197	GTTGGACCCCTCTCAACAAAT	DHS_28	CTCF_12	-
+	chr6	30691198	GTGGACCCCTCTCAACAAATA	DHS_28	CTCF_12	-
-	chr6	30691203	GCCCTCTCAACAAATAGGGTT	DHS_28	CTCF_12	-
-	chr6	30691204	GCCTCTCAACAAATAGGGTTG	DHS_28	CTCF_12	-
+	chr6	30691207	GCTCAACAAATAGGGTTGAGG	DHS_28	CTCF_12	-
+	chr6	30691208	GTCAACAAATAGGGTTGAGGT	DHS_28	CTCF_12	-
+	chr6	30691211	GACAAATAGGGTTGAGGTGGG	DHS_28	CTCF_12	-
+	chr6	30691256	GACACAACCTGCAACGCCGCT	DHS_28	CTCF_12	-
+	chr6	30691267	GAACGCCGCTTGGAAGACAAA	DHS_28	CTCF_12	-
+	chr6	30691751	GTACAGATTGCTTATTAATC	DHS_29	-	-
+	chr6	30691763	GTATTAATCTGGCAAATTGAA	DHS_29	-	-
+	chr6	30691803	GACACAAAGAAGTGGTACTTC	DHS_29	-	-
+	chr6	30691804	GCACAAAGAAGTGGTACTTCT	DHS_29	-	-
+	chr6	30691875	GACTGCTGCTAACCAGAGGA	DHS_29	-	-
-	chr6	30691906	GCCTCCTTATATAAACACATA	DHS_29	-	-
+	chr6	30691920	GCACATATGGCTTTGGCAGTC	DHS_29	-	-
+	chr6	30691931	GTTGGCAGTCTGGAAATTGGC	DHS_29	-	-
+	chr6	30691941	GGAAATTGGCTGGATTACCA	DHS_29	-	-
+	chr6	30691942	GAAATTGGCTGGATTACCAA	DHS_29	-	-
+	chr6	30692003	GCCCTCTCTTTGCCTGCAGCA	DHS_29	-	-
+	chr6	30692025	GCAGGGAAGAGATAGGTGGT	DHS_29	-	-
+	chr6	30692027	GAGGGAAGAGATAGGTGGTAG	DHS_29	-	-
+	chr6	30692057	GACAAGACTGTTTAGACCCAC	DHS_29	-	-
-	chr6	30692856	GAAAGCGGTTGCGATCAGGAT	DHS_30	Promoter_4	-
-	chr6	30692861	GGCTTAAAGCGGTTGCGATC	DHS_30	Promoter_4	-
-	chr6	30692993	GAGCGGGCGGCCGCCATTCTG	DHS_30	Promoter_4	-
-	chr6	30692993	GCAGAATGGCGGCCGCCCGCT	DHS_30	Promoter_4	-
-	chr6	30692994	GAGCGGGCGGCCGCCATTCT	DHS_30	Promoter_4	-
-	chr6	30692994	GAGAATGGCGGCCGCCCGCTC	DHS_30	Promoter_4	-
+	chr6	30693013	GCGGGTGGAGTCTTTTATACC	DHS_30	Promoter_4	-
-	chr6	30693042	GCCCAACGCGCCCAAACGTGC	DHS_30	Promoter_4	-
+	chr6	30693077	GTCGCGAGACATTATACGCG	DHS_30	Promoter_4	-
+	chr6	30693091	GTACGCGAGGCGTGAACTCAT	DHS_30	Promoter_4	-
+	chr6	30693123	GATGACAACTCGCCAACTGAT	DHS_30	Promoter_4	-
+	chr6	30693161	GCTTTGCTCCGCCCCTTTCCC	DHS_30	Promoter_4	-
+	chr6	30693493	GCTTCCGTCCTGACGCAAACG	DHS_31	Promoter_5	-
+	chr6	30693494	GTTCCGTCCTGACGCAAACGT	DHS_31	Promoter_5	-
+	chr6	30693495	GTCCGTCCTGACGCAAACGTG	DHS_31	Promoter_5	-
+	chr6	30693514	GGGGCCGCCTTCCGCACTGC	DHS_31	Promoter_5	-
-	chr6	30693525	GCCGCACTGCGGGCTTGTCCT	DHS_31	Promoter_5	-
+	chr6	30693587	GTTTCCGTCAATTCCTGTCCT	DHS_31	Promoter_5	-
+	chr6	30693602	GTCCTGGGCGTACGTCAAGA	DHS_31	Promoter_5	-
+	chr6	30693605	GCTGGGCGTACGTCAAGATGG	DHS_31	Promoter_5	-
-	chr6	30693746	GTGGAGCGACAACCTCGAGA	DHS_31	Promoter_5	-
-	chr6	30693849	GTCGGGATTAGAAAATGCGCG	DHS_31	Promoter_5	-
-	chr6	30693850	GCTCGGGATTAGAAAATGCGC	DHS_31	Promoter_5	-
+	chr6	30693866	GCGAGCCGAGGACTAAACGCC	DHS_31	Promoter_5	-
+	chr6	30693867	GAGCCGAGGACTAAACGCCA	DHS_31	Promoter_5	-
+	chr6	30693867	GTGGCGTTTAGTCCTCGGCTC	DHS_31	Promoter_5	-
+	chr6	30702521	GCGCTAGGGGGCAAGGTCTAC	DHS_32	CTCF_13	Promoter_6
+	chr6	30702524	GTAGGGGGCAAGGTCTACAGG	DHS_32	CTCF_13	Promoter_6
+	chr6	30702525	GAGGGGGCAAGGTCTACAGGC	DHS_32	CTCF_13	Promoter_6
+	chr6	30702526	GGGGGCAAGGTCTACAGGCG	DHS_32	CTCF_13	Promoter_6
+	chr6	30702533	GAGGTCTACAGGCGGGGCTCC	DHS_32	CTCF_13	Promoter_6
-	chr6	30702551	GCCTGGAAATAAAGACTCCGA	DHS_32	CTCF_13	Promoter_6
+	chr6	30702552	GCTGGAAATAAAGACTCCGAG	DHS_32	CTCF_13	Promoter_6
+	chr6	30702555	GAAATAAAGACTCCGAGAGG	DHS_32	CTCF_13	Promoter_6
+	chr6	30702560	GAAAGACTCCGAGAGGCGGTG	DHS_32	CTCF_13	Promoter_6
+	chr6	30702567	GCCGAGAGGCGGTGCGGCGAG	DHS_32	CTCF_13	Promoter_6
+	chr6	30702570	GAGAGGCGGTGCGGCGAGAGG	DHS_32	CTCF_13	Promoter_6
+	chr6	30702571	GAGGCGGTGCGGCGAGAGGA	DHS_32	CTCF_13	Promoter_6
+	chr6	30702572	GAGGCGGTGCGGCGAGAGGAG	DHS_32	CTCF_13	Promoter_6
+	chr6	30702591	GGGGCGGAAGTGACGTCGTG	DHS_32	CTCF_13	Promoter_6
+	chr6	30702592	GGGCGGAAGTGACGTCGTGT	DHS_32	CTCF_13	Promoter_6
+	chr6	30702593	GGCGGAAGTGACGTCGTGTG	DHS_32	CTCF_13	Promoter_6
+	chr6	30702596	GGAAGTGACGTCGTGTGGGG	DHS_32	CTCF_13	Promoter_6
+	chr6	30702597	GAAGTGACGTCGTGTGGGGC	DHS_32	CTCF_13	Promoter_6
+	chr6	30702615	GCGGGTCCGACCGCGCACAA	DHS_32	CTCF_13	Promoter_6
+	chr6	30702616	GCGGGTCCGACCGCGCACAAT	DHS_32	CTCF_13	Promoter_6
+	chr6	30702622	GCGACCGCGCACAATGGGCCA	DHS_32	CTCF_13	Promoter_6
+	chr6	30702640	GCATGGAGTTCCCGTTCGATG	DHS_32	CTCF_13	Promoter_6
+	chr6	30702655	GCGATGTGGACGCGCTGTTCC	DHS_32	CTCF_13	Promoter_6
+	chr6	30702660	GTGGACGCGCTGTTCCCGGAG	DHS_32	CTCF_13	Promoter_6
+	chr6	30702667	GCTGTTCCCGGAGCGGATCA	DHS_32	CTCF_13	Promoter_6
-	chr6	30702673	GCCCGGAGCGGATCACGGTGC	DHS_32	CTCF_13	Promoter_6
+	chr6	30702687	GCGGTGCTGGACCAGCACCTG	DHS_32	CTCF_13	Promoter_6
+	chr6	30722215	GACCTACCAGGTCTGCCAGTG	DHS_33	-	-
-	chr6	30722220	GCCAGGTCTGCCAGTGAGGAG	DHS_33	-	-
+	chr6	30722221	GCAGGTCTGCCAGTGAGGAGC	DHS_33	-	-
+	chr6	30722233	GTGAGGAGCAGGCCTTGTCAC	DHS_33	-	-
+	chr6	30722243	GCCTTGTCACAGGATGGGTC	DHS_33	-	-
-	chr6	30722244	GCCTTGTCACAGGATGGGTCT	DHS_33	-	-
+	chr6	30722245	GCTTGTCACAGGATGGGTCTG	DHS_33	-	-
-	chr6	30722274	GCCATGCACACAGCTCCTCCA	DHS_33	-	-
+	chr6	30722275	GCATGCACACAGCTCCTCCAC	DHS_33	-	-
+	chr6	30722281	GCACAGCTCCTCCACAGGCCC	DHS_33	-	-
+	chr6	30722301	GCGGCCCCGCCAGCCCAGTCC	DHS_33	-	-
+	chr6	30722308	GCCAGCCCAGTCCTGGACAG	DHS_33	-	-
+	chr6	30722331	GTGGGGACATACTCAACGCC	DHS_33	-	-
-	chr6	30722349	GCCAGGTTCATTCGAAACCTG	DHS_33	-	-
+	chr6	30722350	GCAGGTTCATTCGAAACCTGC	DHS_33	-	-
+	chr6	30722367	GTGCAGGAACGTCGCAGCACC	DHS_33	-	-
+	chr6	30722742	GTCAGGCAGTCTCCGAGCCCG	DHS_34	Promoter_7	-
+	chr6	30722743	GCAGGCAGTCTCCGAGCCCGC	DHS_34	Promoter_7	-
+	chr6	30722749	GTCTCCGAGCCCGCGGGCGC	DHS_34	Promoter_7	-
-	chr6	30722806	GCCCTCGAGCCTGCAGTGCGC	DHS_34	Promoter_7	-
+	chr6	30722812	GAGCCTGCAGTGCGCAAGCGC	DHS_34	Promoter_7	-
+	chr6	30722895	GCCCCTTCACGAAGCCGGCTC	DHS_34	Promoter_7	-
-	chr6	30723028	GCCTGGTAGGCGCGCAGGCAA	DHS_34	Promoter_7	-
-	chr6	30723034	GTCGAGCCTGGTAGGCGCGC	DHS_34	Promoter_7	-
-	chr6	30723111	GCGCCCCACGCACCGGCTTTG	DHS_34	Promoter_7	-
+	chr6	30723199	GCGTGGACAGGCTAGGGGTCG	DHS_34	Promoter_7	-
+	chr6	30723244	GACGTCCTTGCGCGACAGGCC	DHS_34	Promoter_7	-
+	chr6	30723244	GGCCTGTCGCGCAAGGACGT	DHS_34	Promoter_7	-
-	chr6	30723249	GACCGACGTCCTTGCGCGAC	DHS_34	Promoter_7	-
+	chr6	30723261	GCGTCGGTCCTCCCAGGTTTG	DHS_34	Promoter_7	-
+	chr6	30723341	GCCGCGGTTACCTGTGCCTAG	DHS_34	Promoter_7	-
-	chr6	30723468	GCCGCTCTCCGAGTGCAAGAC	DHS_34	Promoter_7	-
+	chr6	30723471	GTTGCACTCGGAGAGCGGTCC	DHS_34	Promoter_7	-
+	chr6	30723503	GCGGCCAGTGTGCACCCGGTT	DHS_34	Promoter_7	-
-	chr6	30723590	GTCGGGTACCTCGGTCCCCGA	DHS_34	Promoter_7	-
-	chr6	30723600	GGCGGACCGCTCGGGTACCT	DHS_34	Promoter_7	-
-	chr6	30723706	GTACCGACGTTGAAACTGCAA	DHS_34	Promoter_7	-
+	chr6	30746485	GCCAACCTCAGATTTCACCCT	CTCF_14	-	-
+	chr6	30746492	GCAGATTTCACCCTGGGATCT	CTCF_14	-	-
+	chr6	30746493	GAGATTTCACCCTGGGATCTT	CTCF_14	-	-
+	chr6	30746494	GATTTCACCCTGGGATCTTG	CTCF_14	-	-
-	chr6	30746544	GCCTTCTTGTCTGACCGTTCC	CTCF_14	-	-
+	chr6	30746593	GCTGTCGAACCCGCTCAGCAA	CTCF_14	-	-
+	chr6	30746610	GCAAAGGCATCACGCTCCTCC	CTCF_14	-	-
+	chr6	30746619	GCACGCTCCTCCAGGTCCTGA	CTCF_14	-	-
+	chr6	30746660	GTCCCACTCATCTTCCGACTC	CTCF_14	-	-
+	chr6	30746701	GACTCCCCCTGCAGCCCATCC	CTCF_14	-	-
+	chr6	30746703	GTCCCCCTGCAGCCCATCCAG	CTCF_14	-	-
+	chr6	30746715	GCCATCCAGGGGATTAAATAA	CTCF_14	-	-
+	chr6	30746834	GCTTCCTCACGCTTCTTCCTG	CTCF_14	-	-
+	chr6	30746861	GTCCGCTTTTTACGTTTCTTC	CTCF_14	-	-
+	chr6	30748456	GTAGGCGCTGCACGAACTCCT	DHS_35	-	-
+	chr6	30748462	GCTGCACGAACTCCTCGGCAG	DHS_35	-	-
+	chr6	30748477	GGCAGAGGTGCAGCGCTGTG	DHS_35	-	-
+	chr6	30748494	GTGCGGTACCGATCAGAAAC	DHS_35	-	-
+	chr6	30748495	GTGCGGTACCGATCAGAAACT	DHS_35	-	-
+	chr6	30748576	GCAGACCCGCCGGCGTCGCCA	DHS_35	-	-
+	chr6	30748599	GCGACTCACGCTCCCTGCTCC	DHS_35	-	-
+	chr6	30748741	GAAAGCTGTCTTCCCGTACCG	DHS_36	CTCF_15	Promoter_8
+	chr6	30748748	GTCTTCCCGTACCGCGGAGCC	DHS_36	CTCF_15	Promoter_8
+	chr6	30748752	GCCCGTACCGCGGAGCCCGGA	DHS_36	CTCF_15	Promoter_8
-	chr6	30748753	GCCGTACCGCGGAGCCCGGAA	DHS_36	CTCF_15	Promoter_8
+	chr6	30748754	GCGTACCGCGGAGCCCGGAAG	DHS_36	CTCF_15	Promoter_8
+	chr6	30748768	GCGGAAGGGGCTGTACTTTTT	DHS_36	CTCF_15	Promoter_8
+	chr6	30748784	GTTTTCGGCCTCTAAGCACTA	DHS_36	CTCF_15	Promoter_8
+	chr6	30748787	GTCGGCCTCTAAGCACTACGG	DHS_36	CTCF_15	Promoter_8
+	chr6	30748810	GCCGAGCGAGTTCAAACCTCG	DHS_36	CTCF_15	Promoter_8
+	chr6	30748830	GCGGAACCATACCTGAAAACT	DHS_36	CTCF_15	Promoter_8
+	chr6	30748831	GGAACCATACCTGAAAACTC	DHS_36	CTCF_15	Promoter_8
+	chr6	30748832	GAACCATACCTGAAAACTCG	DHS_36	CTCF_15	Promoter_8
+	chr6	30748887	GTTTCTCTGACGCCCCCTGA	DHS_36	CTCF_15	Promoter_8
+	chr6	30754878	GACAGCGCCCGCTCTGACAGC	DHS_37	CTCF_16	enhancer_3
+	chr6	30754879	GCAGCGCCCGCTCTGACAGCA	DHS_37	CTCF_16	enhancer_3
+	chr6	30754880	GAGCGCCCGCTCTGACAGCAG	DHS_37	CTCF_16	enhancer_3
+	chr6	30754881	GCGCCCGCTCTGACAGCAGG	DHS_37	CTCF_16	enhancer_3
+	chr6	30754891	GTGACAGCAGGGGGCGCCCTC	DHS_37	CTCF_16	enhancer_3
+	chr6	30754922	GCCTCCGCTTACCCACAATC	DHS_37	CTCF_16	enhancer_3
-	chr6	30754923	GCCTCCGCTTACCCACAATCA	DHS_37	CTCF_16	enhancer_3
+	chr6	30754929	GCTTACCCACAATCAGGGCCT	DHS_37	CTCF_16	enhancer_3
-	chr6	30754946	GCCTTGGTGCGCAGCCCGCCC	DHS_37	CTCF_16	enhancer_3
+	chr6	30754954	GCGCAGCCCGCCCTGGAGCTC	DHS_37	CTCF_16	enhancer_3
+	chr6	30754995	GTTCCTCATCCTCTTCGTCGT	DHS_37	CTCF_16	enhancer_3
+	chr6	30754996	GTCCTCATCCTCTTCGTCGTC	DHS_37	CTCF_16	enhancer_3
+	chr6	30755000	GCATCCTCTTCGTCGTCGGGT	DHS_37	CTCF_16	enhancer_3
+	chr6	30755001	GATCCTCTTCGTCGTCGGGTT	DHS_37	CTCF_16	enhancer_3
+	chr6	30755008	GTCGTCGTCGGGTTGGGCTGC	DHS_37	CTCF_16	enhancer_3
+	chr6	30755011	GTCGTCGGGTTGGGCTGCTGG	DHS_37	CTCF_16	enhancer_3
+	chr6	30755012	GCGTCGGGTTGGGCTGCTGGA	DHS_37	CTCF_16	enhancer_3
+	chr6	30755018	GTTGGGCTGCTGGAGGGTTG	DHS_37	CTCF_16	enhancer_3
+	chr6	30755035	GTTGGGGGCACTGGGGACCTC	DHS_37	CTCF_16	enhancer_3
+	chr6	30755041	GCACTGGGGACCTCAGGCTC	DHS_37	CTCF_16	enhancer_3
+	chr6	30755042	GCACTGGGGACCTCAGGCTCC	DHS_37	CTCF_16	enhancer_3
+	chr6	30755070	GCTCCTCCAGTACCGAACTCT	DHS_37	CTCF_16	enhancer_3
-	chr6	30755072	GCCTCCAGTACCGAACTCTCG	DHS_37	CTCF_16	enhancer_3
+	chr6	30755073	GCTCCAGTACCGAACTCTCGG	DHS_37	CTCF_16	enhancer_3
+	chr6	30755074	GTCCAGTACCGAACTCTCGGA	DHS_37	CTCF_16	enhancer_3
+	chr6	30755075	GCCAGTACCGAACTCTCGGAG	DHS_37	CTCF_16	enhancer_3
-	chr6	30755081	GCCGAACTCTCGGAGGGGTAT	DHS_37	CTCF_16	enhancer_3
+	chr6	30755088	GCTCGGAGGGGTATTGGTACG	DHS_37	CTCF_16	enhancer_3
+	chr6	30755096	GGTATTGGTACGTGGTCTCC	DHS_37	CTCF_16	enhancer_3
+	chr6	30755097	GTATTGGTACGTGGTCTCCA	DHS_37	CTCF_16	enhancer_3
+	chr6	30755112	GCTCCAGGGCTGTCTCGCTGA	DHS_37	CTCF_16	enhancer_3
-	chr6	30755114	GCCAGGGCTGTCTCGCTGAAG	DHS_37	CTCF_16	enhancer_3
+	chr6	30755129	GTGAAGGAGATCTTAAGCTGA	DHS_37	CTCF_16	enhancer_3
+	chr6	30755132	GAGGAGATCTTAAGCTGAAGG	DHS_37	CTCF_16	enhancer_3
+	chr6	30755133	GGAGATCTTAAGCTGAAGGA	DHS_37	CTCF_16	enhancer_3
+	chr6	30755179	GTCAGCAGGGGAGAAGCCCG	DHS_37	CTCF_16	enhancer_3
+	chr6	30755180	GTCAGCAGGGGAGAAGCCCGC	DHS_37	CTCF_16	enhancer_3
+	chr6	30755181	GCAGCAGGGGAGAAGCCCGCG	DHS_37	CTCF_16	enhancer_3
+	chr6	30755182	GAGCAGGGGAGAAGCCCGCGG	DHS_37	CTCF_16	enhancer_3
+	chr6	30755188	GGAGAAGCCCGCGGGGGTTG	DHS_37	CTCF_16	enhancer_3
+	chr6	30755189	GAGAAGCCCGCGGGGGTTGA	DHS_37	CTCF_16	enhancer_3
+	chr6	30757625	GCTGGGGAAACGATCTGCGGG	DHS_38	enhancer_4	-
+	chr6	30757930	GACCCCCCACCAACTTCTGAC	DHS_38	enhancer_4	-
-	chr6	30757931	GCCCCCCACCAACTTCTGACT	DHS_38	enhancer_4	-
+	chr6	30757958	GTCAGAAATGCACAGCCTGCA	DHS_38	enhancer_4	-
+	chr6	30757959	GCAGAAATGCACAGCCTGCAT	DHS_38	enhancer_4	-
+	chr6	30757964	GATGCACAGCCTGCATGGGAG	DHS_38	enhancer_4	-
+	chr6	30757965	GTGCACAGCCTGCATGGGAGT	DHS_38	enhancer_4	-
+	chr6	30757966	GCACAGCCTGCATGGGAGTG	DHS_38	enhancer_4	-
-	chr6	30757972	GCCTGCATGGGAGTGGGGGGG	DHS_38	enhancer_4	-
+	chr6	30757977	GATGGGAGTGGGGGGGTAGAG	DHS_38	enhancer_4	-
+	chr6	30758016	GCCTCTCCCATCAGCTATATA	DHS_38	enhancer_4	-
+	chr6	30758025	GTCAGCTATATAAGGTCACAA	DHS_38	enhancer_4	-
+	chr6	30758026	GCAGCTATATAAGGTCACAAT	DHS_38	enhancer_4	-
+	chr6	30758027	GAGCTATATAAGGTCACAATG	DHS_38	enhancer_4	-
+	chr6	30758031	GATATAAGGTCACAATGGGGC	DHS_38	enhancer_4	-
+	chr6	30758052	GGTCTCTCAGCCCAACCAAG	DHS_38	enhancer_4	-
+	chr6	30758059	GCAGCCCAACCAAGAGGCCTC	DHS_38	enhancer_4	-
+	chr6	30758060	GAGCCCAACCAAGAGGCCTCT	DHS_38	enhancer_4	-
+	chr6	30758065	GAACCAAGAGGCCTCTGGGGT	DHS_38	enhancer_4	-
+	chr6	30758066	GACCAAGAGGCCTCTGGGGTA	DHS_38	enhancer_4	-
-	chr6	30758283	GCCTGAAGAACAGGTTGCTGA	DHS_39	enhancer_5	-
+	chr6	30758284	GCTGAAGAACAGGTTGCTGAC	DHS_39	enhancer_5	-
+	chr6	30758285	GTGAAGAACAGGTTGCTGACA	DHS_39	enhancer_5	-
+	chr6	30758286	GAAGAACAGGTTGCTGACAG	DHS_39	enhancer_5	-
+	chr6	30758287	GAAGAACAGGTTGCTGACAGG	DHS_39	enhancer_5	-
+	chr6	30758293	GAGGTTGCTGACAGGGGGTAG	DHS_39	enhancer_5	-
+	chr6	30758294	GGTTGCTGACAGGGGGTAGA	DHS_39	enhancer_5	-
+	chr6	30758297	GTGCTGACAGGGGGTAGAGGG	DHS_39	enhancer_5	-
+	chr6	30758321	GGGTGAGGCGTCTGGGTCAG	DHS_39	enhancer_5	-
+	chr6	30758458	GACTCAGCCCCACCAGCCTTC	DHS_39	enhancer_5	-
+	chr6	30758484	GCCACCCCAGGCTTCCTGTTT	DHS_39	enhancer_5	-
+	chr6	30758498	GCTGTTTGGGCGATCTGCTTC	DHS_39	enhancer_5	-
+	chr6	30761764	GTGGTGGCCATGGTCGTCTTG	DHS_40	-	-
+	chr6	30761769	GCCATGGTCGTCTTGAGGTG	DHS_40	-	-
+	chr6	30761770	GCCATGGTCGTCTTGAGGTGA	DHS_40	-	-
+	chr6	30761774	GGTCGTCTTGAGGTGAGGGT	DHS_40	-	-
+	chr6	30761775	GTCGTCTTGAGGTGAGGGTA	DHS_40	-	-
+	chr6	30761784	GAGGTGAGGGTAGGGAGCACT	DHS_40	-	-
+	chr6	30761785	GGTGAGGGTAGGGAGCACTG	DHS_40	-	-
+	chr6	30761829	GCTCCAGAGAGTGAGACAGCC	DHS_40	-	-
+	chr6	30761830	GTCCAGAGAGTGAGACAGCCC	DHS_40	-	-
+	chr6	30761831	GCCAGAGAGTGAGACAGCCCG	DHS_40	-	-
+	chr6	30761843	GACAGCCCGGGGGTGAGACTG	DHS_40	-	-
-	chr6	30761847	GCCCGGGGGTGAGACTGAGGG	DHS_40	-	-
+	chr6	30761851	GGGGTGAGACTGAGGGTGGG	DHS_40	-	-
+	chr6	30761910	GGGCAGAGGGGCTAAGGATG	DHS_40	-	-
+	chr6	30761918	GGGCTAAGGATGAGGACAGA	DHS_40	-	-
+	chr6	30762935	GAGAGGGACCGAGGGAGATC	DHS_41	Promoter_9	-
+	chr6	30762942	GACCGAGGGAGATCCGGAGAC	DHS_41	Promoter_9	-
+	chr6	30762951	GATCCGGAGACTGGAGGGAG	DHS_41	Promoter_9	-
+	chr6	30763001	GAGGCAGCAAAGGAGGAGGGA	DHS_41	Promoter_9	-
+	chr6	30763018	GGACGGAGACAGAGACCAGG	DHS_41	Promoter_9	-
+	chr6	30763026	GACAGAGACCAGGGGGCCGGG	DHS_41	Promoter_9	-
+	chr6	30763027	GCAGAGACCAGGGGGCCGGGC	DHS_41	Promoter_9	-
+	chr6	30763028	GAGAGACCAGGGGGCCGGGCG	DHS_41	Promoter_9	-
+	chr6	30763050	GGCGGCGACCGCTTTGTCTA	DHS_41	Promoter_9	-
-	chr6	30763058	GCCGCTTTGTCTAAGGACAAT	DHS_41	Promoter_9	-
+	chr6	30763059	GCGCTTTGTCTAAGGACAATG	DHS_41	Promoter_9	-
+	chr6	30763064	GTGTCTAAGGACAATGAGGAG	DHS_41	Promoter_9	-
+	chr6	30763065	GTCTAAGGACAATGAGGAGA	DHS_41	Promoter_9	-
+	chr6	30763599	GAAAAAGGGGATTTGAAGGAA	DHS_42	CTCF_17	-
+	chr6	30763605	GGGATTTGAAGGAATGGGAA	DHS_42	CTCF_17	-
+	chr6	30763607	GATTTGAAGGAATGGGAATG	DHS_42	CTCF_17	-
+	chr6	30763613	GAAGGAATGGGAATGGGGACC	DHS_42	CTCF_17	-
+	chr6	30763622	GAATGGGGACCCGGCCGCTC	DHS_42	CTCF_17	-
+	chr6	30763630	GACCCGGCCGCTCTGGCAAAG	DHS_42	CTCF_17	-
-	chr6	30763631	GCCCGGCCGCTCTGGCAAAGT	DHS_42	CTCF_17	-
-	chr6	30763632	GCCGGCCGCTCTGGCAAAGTG	DHS_42	CTCF_17	-
+	chr6	30763633	GCGGCCGCTCTGGCAAAGTGG	DHS_42	CTCF_17	-
-	chr6	30763636	GCCGCTCTGGCAAAGTGGGGG	DHS_42	CTCF_17	-
+	chr6	30763637	GCGCTCTGGCAAAGTGGGGGC	DHS_42	CTCF_17	-
+	chr6	30763644	GCAAAGTGGGGGCGGGTCTG	DHS_42	CTCF_17	-
+	chr6	30763645	GCAAAGTGGGGGCGGGTCTGC	DHS_42	CTCF_17	-
+	chr6	30763646	GAAAGTGGGGGCGGGTCTGCG	DHS_42	CTCF_17	-
+	chr6	30763647	GAAGTGGGGGCGGGTCTGCGG	DHS_42	CTCF_17	-
+	chr6	30763664	GCGGGGGTGGCCGAACCCCAG	DHS_42	CTCF_17	-
-	chr6	30763673	GCCGAACCCCAGCGGTTGCCA	DHS_42	CTCF_17	-
+	chr6	30763674	GCGAACCCCAGCGGTTGCCAG	DHS_42	CTCF_17	-
+	chr6	30763675	GAACCCCAGCGGTTGCCAGA	DHS_42	CTCF_17	-
-	chr6	30763680	GCCAGCGGTTGCCAGAGGGCG	DHS_42	CTCF_17	-
+	chr6	30763683	GCGGTTGCCAGAGGGCGTGG	DHS_42	CTCF_17	-
+	chr6	30763703	GTGGCTGCCCAGACTCCAGTT	DHS_42	CTCF_17	-
+	chr6	30763713	GACTCCAGTTCGGTGCTCCC	DHS_42	CTCF_17	-
+	chr6	30763755	GCCAAACTCAGCCCTGTAGCT	DHS_42	CTCF_17	-
+	chr6	30766447	GCTCCCTCCCCTGTAGCTTCT	DHS_43	-	-
+	chr6	30766459	GTAGCTTCTCGGCCGCTTTCA	DHS_43	-	-
+	chr6	30766478	GAAGGTTCGAGTTCCCTCTCT	DHS_43	-	-
+	chr6	30766529	GCGCCCTCAATCCCTCTCCTA	DHS_43	-	-
+	chr6	30776205	GAGGGTAGTGGAGTTCTCAGG	DHS_44	-	-
+	chr6	30776221	GCAGGTGGATGACATCTCCAA	DHS_44	-	-
+	chr6	30776222	GAGGTGGATGACATCTCCAAA	DHS_44	-	-
+	chr6	30776223	GGTGGATGACATCTCCAAAG	DHS_44	-	-
+	chr6	30776242	GGGGAGAGGACAAAGGCCTC	DHS_44	-	-
+	chr6	30776247	GAGGACAAAGGCCTCTGGCT	DHS_44	-	-
+	chr6	30776276	GCTTCAGCACTCCAGTCAGC	DHS_44	-	-
+	chr6	30776284	GACTCCAGTCAGCAGGAACTC	DHS_44	-	-
+	chr6	30776291	GTCAGCAGGAACTCAGGCGAG	DHS_44	-	-
+	chr6	30776314	GAGGGGCAGCCCAACCCGTAG	DHS_44	-	-
+	chr6	30776319	GCAGCCCAACCCGTAGTGGAA	DHS_44	-	-
-	chr6	30776328	GCCGTAGTGGAATGGAGCAAT	DHS_44	-	-
+	chr6	30776329	GCGTAGTGGAATGGAGCAATG	DHS_44	-	-
+	chr6	30776330	GTAGTGGAATGGAGCAATGA	DHS_44	-	-
+	chr6	30776341	GAGCAATGAGGGAAGTCCTG	DHS_44	-	-
+	chr6	30793162	GTCAAATAGGTGGTGTCTCCC	DHS_45	CTCF_18	Promoter_10
+	chr6	30793187	GCTGAGATCAGTTAATGAGA	DHS_45	CTCF_18	Promoter_10
+	chr6	30793233	GACAGAATAATGCACGTCGAT	DHS_45	CTCF_18	Promoter_10
+	chr6	30793234	GCAGAATAATGCACGTCGATT	DHS_45	CTCF_18	Promoter_10
+	chr6	30793245	GACGTCGATTGGGCAGCTCCA	DHS_45	CTCF_18	Promoter_10
+	chr6	30793246	GCGTCGATTGGGCAGCTCCAA	DHS_45	CTCF_18	Promoter_10
+	chr6	30793317	GCAAACCGCGACCAGAGAGTC	DHS_45	CTCF_18	Promoter_10
-	chr6	30795130	GCCTCTCTCGTTTTTCAATAC	DHS_46	-	-
+	chr6	30795131	GCTCTCTCGTTTTTCAATACT	DHS_46	-	-
+	chr6	30795152	GGTCTCTTGCAGAGTTGCAG	DHS_46	-	-
+	chr6	30795155	GCTCTTGCAGAGTTGCAGTGG	DHS_46	-	-
+	chr6	30795163	GAGTTGCAGTGGCGGCCACC	DHS_46	-	-
+	chr6	30795218	GCTTCATTAACATGTCTAAAG	DHS_46	-	-
+	chr6	30795222	GATTAACATGTCTAAAGAGGC	DHS_46	-	-
+	chr6	30795861	GCGTCACTTCATTTTGCAGCA	DHS_47	Promoter_11	-
+	chr6	30795872	GTTTGCAGCATGGACAACAAT	DHS_47	Promoter_11	-
+	chr6	30795873	GTTGCAGCATGGACAACAATA	DHS_47	Promoter_11	-
+	chr6	30795874	GTGCAGCATGGACAACAATAG	DHS_47	Promoter_11	-
+	chr6	30795911	GAGAGGACTGCGCTCGTCCAC	DHS_47	Promoter_11	-
+	chr6	30795919	GCGCTCGTCCACTGGCTCAG	DHS_47	Promoter_11	-
+	chr6	30795934	GCTCAGAGGCCAATGGACGCC	DHS_47	Promoter_11	-
+	chr6	30795945	GATGGACGCCTGGTACATGAC	DHS_47	Promoter_11	-
+	chr6	30795960	GATGACCGGCATCGACTAATC	DHS_47	Promoter_11	-
+	chr6	30795961	GTGACCGGCATCGACTAATCA	DHS_47	Promoter_11	-
+	chr6	30795966	GGCATCGACTAATCAGGGCC	DHS_47	Promoter_11	-
+	chr6	30795976	GAATCAGGGCCAGGCTCGATG	DHS_47	Promoter_11	-
+	chr6	30795999	GCTTTGTCTCCCTACCGCGCG	DHS_47	Promoter_11	-
+	chr6	30796000	GTTTGTCTCCCTACCGCGCGC	DHS_47	Promoter_11	-
+	chr6	30796001	GTTGTCTCCCTACCGCGCGCG	DHS_47	Promoter_11	-
+	chr6	30796600	GTAACGGTCCGAGAACCGGGC	DHS_48	-	-
+	chr6	30796601	GAACGGTCCGAGAACCGGGCA	DHS_48	-	-
+	chr6	30796634	GGAAACGGTCGCAGACAAAG	DHS_48	-	-
+	chr6	30796635	GAAACGGTCGCAGACAAAGC	DHS_48	-	-
+	chr6	30796636	GAAACGGTCGCAGACAAAGCG	DHS_48	-	-
+	chr6	30796641	GTCGCAGACAAAGCGGGGCG	DHS_48	-	-
+	chr6	30796677	GCATCCCGCCCAACCCCCCTG	DHS_48	-	-
+	chr6	30796678	GATCCCGCCCAACCCCCCTGC	DHS_48	-	-
+	chr6	30796679	GTCCCGCCCAACCCCCCTGCG	DHS_48	-	-
+	chr6	30796687	GAACCCCCCTGCGGGGTACTT	DHS_48	-	-
+	chr6	30796688	GACCCCCCTGCGGGGTACTTA	DHS_48	-	-
+	chr6	30796697	GCGGGGTACTTAGGGCCAAAC	DHS_48	-	-
+	chr6	30796702	GTACTTAGGGCCAAACCGGAG	DHS_48	-	-
+	chr6	30796703	GACTTAGGGCCAAACCGGAGC	DHS_48	-	-
+	chr6	30796707	GAGGGCCAAACCGGAGCGGGA	DHS_48	-	-
+	chr6	30796708	GGGCCAAACCGGAGCGGGAA	DHS_48	-	-
+	chr6	30796709	GGCCAAACCGGAGCGGGAAG	DHS_48	-	-
+	chr6	30796714	GAACCGGAGCGGGAAGGGGTG	DHS_48	-	-
+	chr6	30796721	GCGGGAAGGGGTGAGGCCAT	DHS_48	-	-
+	chr6	30796722	GCGGGAAGGGGTGAGGCCATC	DHS_48	-	-
+	chr6	30796725	GAAGGGGTGAGGCCATCGGG	DHS_48	-	-
+	chr6	30796748	GCTGCAGAGAGCTCCAGCGCA	DHS_48	-	-
+	chr6	30796749	GTGCAGAGAGCTCCAGCGCAA	DHS_48	-	-
+	chr6	30796752	GAGAGAGCTCCAGCGCAAGGG	DHS_48	-	-
+	chr6	30796753	GAGAGCTCCAGCGCAAGGGT	DHS_48	-	-
+	chr6	30796754	GAGAGCTCCAGCGCAAGGGTG	DHS_48	-	-
+	chr6	30796755	GAGCTCCAGCGCAAGGGTGG	DHS_48	-	-
+	chr6	30796756	GAGCTCCAGCGCAAGGGTGGG	DHS_48	-	-
+	chr6	30796768	GAGGGTGGGGGGCGATGCGCC	DHS_48	-	-
+	chr6	30797144	GGCTGCTACGTTGTAGCAGA	DHS_49	CTCF_19	-
+	chr6	30797145	GCTGCTACGTTGTAGCAGAA	DHS_49	CTCF_19	-
+	chr6	30797148	GCTACGTTGTAGCAGAAGGG	DHS_49	CTCF_19	-
+	chr6	30797149	GCTACGTTGTAGCAGAAGGGC	DHS_49	CTCF_19	-
+	chr6	30797150	GTACGTTGTAGCAGAAGGGCG	DHS_49	CTCF_19	-
+	chr6	30797158	GAGCAGAAGGGCGGGGCCCTG	DHS_49	CTCF_19	-
+	chr6	30797187	GCCGGGGCGCCGTGGGCGCG	DHS_49	CTCF_19	-
+	chr6	30797198	GTGGGCGCGCGGGGACAATG	DHS_49	CTCF_19	-
+	chr6	30797211	GACAATGCGGCGTTGCCCGC	DHS_49	CTCF_19	-
+	chr6	30797215	GATGCGGCGTTGCCCGCCGGC	DHS_49	CTCF_19	-
+	chr6	30797216	GTGCGGCGTTGCCCGCCGGCA	DHS_49	CTCF_19	-
+	chr6	30797217	GCGGCGTTGCCCGCCGGCAG	DHS_49	CTCF_19	-
-	chr6	30797230	GCCGGCAGGGGCGCGCTACCT	DHS_49	CTCF_19	-
+	chr6	30797231	GCGGCAGGGGCGCGCTACCTT	DHS_49	CTCF_19	-
+	chr6	30797265	GCGCGCGGAATTTTTGTCCC	DHS_49	CTCF_19	-
+	chr6	30798473	GTGGGCACGCCTTATCCCCTT	DHS_50	CTCF_20	-
+	chr6	30798474	GGGCACGCCTTATCCCCTTT	DHS_50	CTCF_20	-
+	chr6	30798513	GTCCCTTTCGTGAACCACCGT	DHS_50	CTCF_20	-
-	chr6	30798514	GCCCTTTCGTGAACCACCGTC	DHS_50	CTCF_20	-
-	chr6	30798515	GCCTTTCGTGAACCACCGTCG	DHS_50	CTCF_20	-
+	chr6	30798539	GCAAAGACGTCTGCTGCCACC	DHS_50	CTCF_20	-
+	chr6	30801042	GTGCTTCCCCCCTCACACACT	DHS_51	-	-
+	chr6	30801814	GAGACCAGCATCCACATCCTC	DHS_52	-	-
-	chr6	30801824	GCCACATCCTCTGGGAACTTG	DHS_52	-	-
+	chr6	30801874	GCAGATGTACTGAACCATAAA	DHS_52	-	-
+	chr6	30801889	GATAAATGGTTGAACTGGCCT	DHS_52	-	-
+	chr6	30806164	GCCCACATGACCTCCAGACC	DHS_53	-	-
+	chr6	30806165	GCCCACATGACCTCCAGACCT	DHS_53	-	-
+	chr6	30806166	GCCACATGACCTCCAGACCTG	DHS_53	-	-
+	chr6	30806206	GTGTCCAGCTGAGCAGCCTCT	DHS_53	-	-
+	chr6	30806215	GAGCAGCCTCTTGGTACAGC	DHS_53	-	-
+	chr6	30806219	GAGCCTCTTGGTACAGCTGGA	DHS_53	-	-
+	chr6	30806234	GCTGGAAGGCTTCTGCCTTCT	DHS_53	-	-
+	chr6	30806257	GCCATCTGCTCAGCCTCGGCT	DHS_53	-	-
+	chr6	30806258	GCATCTGCTCAGCCTCGGCTC	DHS_53	-	-
+	chr6	30806273	GGCTCGGGCTCGGGCCCCTA	DHS_53	-	-
+	chr6	30806279	GGCTCGGGCCCCTATGGCAA	DHS_53	-	-
+	chr6	30806304	GTCAGCTTCCCCACGCATCTG	DHS_53	-	-
-	chr6	30806314	GCCTTAACCCTCAGATGCGTG	DHS_53	-	-
+	chr6	30806428	GTTAACTCACCCGCACAGACG	DHS_54	-	-
-	chr6	30806457	GCCTCCGCCTGCATAATTAGT	DHS_54	-	-
+	chr6	30806458	GCTCCGCCTGCATAATTAGTT	DHS_54	-	-
+	chr6	30806466	GCATAATTAGTTGGGACCTG	DHS_54	-	-
+	chr6	30806474	GAGTTGGGACCTGTGGACAGA	DHS_54	-	-
+	chr6	30806481	GACCTGTGGACAGAAGGGAAG	DHS_54	-	-
+	chr6	30806565	GTCCTGAAACCTGAAATCCAT	DHS_54	-	-
+	chr6	30806573	GCCTGAAATCCATAGGAGTCC	DHS_54	-	-
+	chr6	30806576	GAAATCCATAGGAGTCCAGG	DHS_54	-	-
-	chr6	30806581	GCCATAGGAGTCCAGGTGGTG	DHS_54	-	-
+	chr6	30806701	GTTGTAGCGCTCCGCTTCCGC	DHS_55	CTCF_21	-
+	chr6	30806714	GCTTCCGCTGGCTTCCGCACC	DHS_55	CTCF_21	-
+	chr6	30806715	GTTCCGCTGGCTTCCGCACCC	DHS_55	CTCF_21	-
+	chr6	30806829	GCTCAATCTGCTGCTTAGTCT	DHS_55	CTCF_21	-
+	chr6	30806837	GCTGCTTAGTCTTGGCCACC	DHS_55	CTCF_21	-
+	chr6	30806838	GCTGCTTAGTCTTGGCCACCT	DHS_55	CTCF_21	-
+	chr6	30806842	GTTAGTCTTGGCCACCTGGGT	DHS_55	CTCF_21	-
+	chr6	30806845	GTCTTGGCCACCTGGGTAGG	DHS_55	CTCF_21	-
+	chr6	30806846	GTCTTGGCCACCTGGGTAGGA	DHS_55	CTCF_21	-
+	chr6	30817084	GTTTACCTGTAGCCAGAGTAG	weak_CTCF_2	-	-
+	chr6	30817894	GTACTTACCGGAGACCACCA	DHS_56	Promoter_12	-
+	chr6	30818081	GCTACACCCATGGGTCCGCTA	DHS_56	Promoter_12	-
-	chr6	30818174	GTTTATCAAAGGGAGCGGCGA	DHS_56	Promoter_12	-
-	chr6	30818185	GCGCGGGGGACCTTTATCAAA	DHS_56	Promoter_12	-
-	chr6	30818186	GCGCGGGGGACCTTTATCAA	DHS_56	Promoter_12	-
+	chr6	30818297	GCGGCAGCCCGGCTGGGGTCT	DHS_56	Promoter_12	-
-	chr6	30818425	GTCGCGTCTGCCGCAGCAACG	DHS_56	Promoter_12	-
-	chr6	30818427	GGTCGCGTCTGCCGCAGCAA	DHS_56	Promoter_12	-
-	chr6	30818448	GTTAGTCCGTTGCGGGGGGCG	DHS_56	Promoter_12	-
-	chr6	30818449	GCTTAGTCCGTTGCGGGGGGC	DHS_56	Promoter_12	-
-	chr6	30818450	GCTTAGTCCGTTGCGGGGGG	DHS_56	Promoter_12	-
-	chr6	30818453	GGTGCTTAGTCCGTTGCGGG	DHS_56	Promoter_12	-
-	chr6	30818454	GGGTGCTTAGTCCGTTGCGG	DHS_56	Promoter_12	-
-	chr6	30818456	GGGGGTGCTTAGTCCGTTGC	DHS_56	Promoter_12	-
+	chr6	30818564	GTCGGGCCCAGCCGGGCTGCC	DHS_56	Promoter_12	-
+	chr6	30818573	GCCGGGCTGCCTGGTTAGCC	DHS_56	Promoter_12	-
-	chr6	30818574	GCCGGGCTGCCTGGTTAGCCC	DHS_56	Promoter_12	-
+	chr6	30818575	GCGGGCTGCCTGGTTAGCCCG	DHS_56	Promoter_12	-
+	chr6	30818578	GCTGCCTGGTTAGCCCGGGG	DHS_56	Promoter_12	-
+	chr6	30818579	GCTGCCTGGTTAGCCCGGGGA	DHS_56	Promoter_12	-
-	chr6	30818616	GCCCCAGTCACCGCCCTTCTT	DHS_56	Promoter_12	-
+	chr6	30818620	GAGTCACCGCCCTTCTTGAGC	DHS_56	Promoter_12	-
+	chr6	30818621	GTCACCGCCCTTCTTGAGCC	DHS_56	Promoter_12	-
+	chr6	30818662	GCCACGCTCCGCCCCCGGGTG	DHS_56	Promoter_12	-
+	chr6	30818663	GCACGCTCCGCCCCCGGGTGA	DHS_56	Promoter_12	-
+	chr6	30818680	GTGAGGGACTTGACCTCCGCC	DHS_56	Promoter_12	-
+	chr6	30818688	GTTGACCTCCGCCTGGCACCC	DHS_56	Promoter_12	-
+	chr6	30818695	GCCGCCTGGCACCCTGGCGTA	DHS_56	Promoter_12	-
+	chr6	30818696	GCGCCTGGCACCCTGGCGTAA	DHS_56	Promoter_12	-
-	chr6	30818728	GCCCGCGGCGAATCCGAGATG	DHS_56	Promoter_12	-
+	chr6	30818738	GTCGCCGCGGGGCAACTACCT	DHS_56	Promoter_12	-
-	chr6	30819391	GATGTACGTCCTCCTAGGTGA	DHS_57	CTCF_22	Promoter_13
-	chr6	30819540	GCGCCACCCGGTGCTTGAGGC	DHS_57	CTCF_22	Promoter_13
-	chr6	30819604	GCGCGAGAGCGTATCCCCAAC	DHS_57	CTCF_22	Promoter_13
+	chr6	30819617	GTCTCGCGCACCAGGTACGCC	DHS_57	CTCF_22	Promoter_13
+	chr6	30819763	GATTAAAGGGCTCGAGGACGG	DHS_57	CTCF_22	Promoter_13
-	chr6	30820023	GATTCGCGGGGTGCGCTGCCC	DHS_57	CTCF_22	Promoter_13
-	chr6	30820037	GTCGCCGAAGTGGGCATTCGC	DHS_57	CTCF_22	Promoter_13
+	chr6	30820051	GCGGCGATACTCACCACTCGA	DHS_57	CTCF_22	Promoter_13
-	chr6	30820085	GGCACCGAAAGCGCAGCCGC	DHS_57	CTCF_22	Promoter_13
+	chr6	30820091	GCGCTTTCGGTGCCCGCGAG	DHS_57	CTCF_22	Promoter_13
+	chr6	30820173	GTCAGGACCGGAGCCCCGCCG	DHS_57	CTCF_22	Promoter_13
+	chr6	30820327	GATTTATGTGCTCCTGAAAAT	DHS_57	CTCF_22	Promoter_13
+	chr6	30820328	GTTTATGTGCTCCTGAAAATT	DHS_57	CTCF_22	Promoter_13
+	chr6	30820331	GATGTGCTCCTGAAAATTGGG	DHS_57	CTCF_22	Promoter_13
+	chr6	30820332	GTGTGCTCCTGAAAATTGGGC	DHS_57	CTCF_22	Promoter_13
+	chr6	30820360	GCTAACTCCTCCTCCCGCAGC	DHS_57	CTCF_22	Promoter_13
+	chr6	30820361	GTAACTCCTCCTCCCGCAGCT	DHS_57	CTCF_22	Promoter_13
+	chr6	30820362	GAACTCCTCCTCCCGCAGCTG	DHS_57	CTCF_22	Promoter_13
+	chr6	30820367	GCTCCTCCCGCAGCTGGGGAG	DHS_57	CTCF_22	Promoter_13
+	chr6	30820371	GTCCCGCAGCTGGGGAGCGGT	DHS_57	CTCF_22	Promoter_13
+	chr6	30820380	GTGGGGAGCGGTTGGCAGCAG	DHS_57	CTCF_22	Promoter_13
+	chr6	30820381	GGGGAGCGGTTGGCAGCAGC	DHS_57	CTCF_22	Promoter_13
+	chr6	30820385	GAGCGGTTGGCAGCAGCGGGC	DHS_57	CTCF_22	Promoter_13
+	chr6	30820408	GAAATTCCGACGATTAAACAA	DHS_57	CTCF_22	Promoter_13
+	chr6	30820409	GAATTCCGACGATTAAACAAA	DHS_57	CTCF_22	Promoter_13
+	chr6	30820414	GCGACGATTAAACAAAGGGAG	DHS_57	CTCF_22	Promoter_13
+	chr6	30820415	GACGATTAAACAAAGGGAGT	DHS_57	CTCF_22	Promoter_13
+	chr6	30820418	GATTAAACAAAGGGAGTGGG	DHS_57	CTCF_22	Promoter_13
+	chr6	30820442	GACTTGACATGCACAATCCT	DHS_57	CTCF_22	Promoter_13
+	chr6	30822489	GTTTCAGGCGCCCTCTGTTG	CTCF_23	-	-
+	chr6	30822490	GTTTCAGGCGCCCTCTGTTGA	CTCF_23	-	-
+	chr6	30822513	GTACTACTGTTGAGAGTCCTG	CTCF_23	-	-
-	chr6	30822529	GCCTGAGGCTAGTTTCAGTAT	CTCF_23	-	-
+	chr6	30822588	GAAGCTGATACTCCAGCCATG	CTCF_23	-	-
+	chr6	30822589	GAGCTGATACTCCAGCCATGA	CTCF_23	-	-
+	chr6	30822609	GGGCCTTACCCTCCGGCATG	CTCF_23	-	-
-	chr6	30822612	GCCTTACCCTCCGGCATGAGG	CTCF_23	-	-
+	chr6	30822613	GCTTACCCTCCGGCATGAGGA	CTCF_23	-	-
+	chr6	30822701	GTATATTGAGTTTCTGCCTGA	CTCF_23	-	-
+	chr6	30835382	GATGTCAAACAAATGGAATGT	DHS_58	-	-
+	chr6	30835404	GTACAGAGAGCAAGCATTCT	DHS_58	-	-
+	chr6	30835417	GCATTCTAGGCATTCGCAGC	DHS_58	-	-
+	chr6	30835418	GCATTCTAGGCATTCGCAGCC	DHS_58	-	-
+	chr6	30835432	GCAGCCGGGTGAGATCACTG	DHS_58	-	-
+	chr6	30835444	GATCACTGTGGATGGAGTGA	DHS_58	-	-
+	chr6	30835445	GATCACTGTGGATGGAGTGAT	DHS_58	-	-
+	chr6	30835446	GTCACTGTGGATGGAGTGATG	DHS_58	-	-
+	chr6	30835463	GATGGGGGAAAGCTTTTGTTG	DHS_58	-	-
+	chr6	30835476	GTTTGTTGAGGCAGAACCAGC	DHS_58	-	-
+	chr6	30835515	GACAAACACAGATACAATTCC	DHS_58	-	-
+	chr6	30839778	GTCTGCTCATTTCAAATAGGT	enhancer_6	-	-
+	chr6	30839782	GCTCATTTCAAATAGGTTGGA	enhancer_6	-	-
+	chr6	30839803	GGAAGTCTCTCTGCCACATC	enhancer_6	-	-
+	chr6	30839929	GGTGGGATTCGAGAACATGT	enhancer_6	-	-
+	chr6	30839930	GTGGGATTCGAGAACATGTA	enhancer_6	-	-
+	chr6	30839931	GTGGGATTCGAGAACATGTAG	enhancer_6	-	-
+	chr6	30839987	GAGCATAGTTTGTGGAACTCT	enhancer_6	-	-
+	chr6	30839988	GCATAGTTTGTGGAACTCTG	enhancer_6	-	-
+	chr6	30839989	GCATAGTTTGTGGAACTCTGG	enhancer_6	-	-
+	chr6	30845450	GCTCCACGGGCCCTGATGCAC	DHS_59	enhancer_7	-
+	chr6	30845456	GGGCCCTGATGCACTGGCTT	DHS_59	enhancer_7	-
+	chr6	30845507	GCTTTGTTCCAGCCCCACTGA	DHS_59	enhancer_7	-
+	chr6	30845508	GTTTGTTCCAGCCCCACTGAT	DHS_59	enhancer_7	-
+	chr6	30845565	GCTCGTGTCATCAATCCCTC	DHS_59	enhancer_7	-
+	chr6	30857761	GGGCAATGGCTTCCGCCATC	DHS_60	-	-
+	chr6	30857767	GTGGCTTCCGCCATCTGGACC	DHS_60	-	-
-	chr6	30857776	GCCATCTGGACCAGGTGACGT	DHS_60	-	-
+	chr6	30857784	GACCAGGTGACGTCAGCTATC	DHS_60	-	-
+	chr6	30857805	GGATTTCTGCCAGCATTCCC	DHS_60	-	-
+	chr6	30857833	GAAACAGACTTCCGGCTGTC	DHS_60	-	-
+	chr6	30857834	GAAACAGACTTCCGGCTGTCT	DHS_60	-	-
+	chr6	30857851	GTCTGGGCTCTGAGCCATCTT	DHS_60	-	-
+	chr6	30857859	GCTGAGCCATCTTCGGCCTCC	DHS_60	-	-
-	chr6	30857864	GCCATCTTCGGCCTCCTGGGT	DHS_60	-	-
+	chr6	30857867	GTCTTCGGCCTCCTGGGTGAG	DHS_60	-	-
+	chr6	30857890	GTCTTGCAATTCGCAAAGTG	DHS_60	-	-
+	chr6	30866445	GAGTCATTGAAGGCAACTGC	DHS_61	CTCF_24	-
+	chr6	30866461	GCTGCAGGAGTTGCCCCTTCC	DHS_61	CTCF_24	-
-	chr6	30866486	GCCCTCCCATGGCAACTCCCT	DHS_61	CTCF_24	-
+	chr6	30866515	GTAGAGAAGGTTAGAGACGCA	DHS_61	CTCF_24	-
+	chr6	30866518	GAGAAGGTTAGAGACGCATGG	DHS_61	CTCF_24	-
+	chr6	30866540	GTTCCCACCCCTCCTGTGAA	DHS_61	CTCF_24	-
-	chr6	30866552	GCCTGTGAAAGGCTCCCTTCT	DHS_61	CTCF_24	-
+	chr6	30866559	GAAGGCTCCCTTCTGAGTTCC	DHS_61	CTCF_24	-
+	chr6	30866608	GATGCCTGCCTAATACCTGAA	DHS_61	CTCF_24	-
+	chr6	30886647	GCAATTCCCCTAGTCAGCCC	DHS_62	enhancer_8	-
+	chr6	30886667	GAGGACCAGTACTAGAGAGCT	DHS_62	enhancer_8	-
+	chr6	30890162	GTCAGACTGCCTTGAATCCAG	DHS_63	-	-
+	chr6	30890165	GACTGCCTTGAATCCAGGGG	DHS_63	-	-
+	chr6	30890192	GATGACTGGGTAATGAGTCAC	DHS_63	-	-
+	chr6	30890202	GAATGAGTCACCGGTAGAAGT	DHS_63	-	-
+	chr6	30890210	GACCGGTAGAAGTCGGCTTGA	DHS_63	-	-
-	chr6	30890211	GCCGGTAGAAGTCGGCTTGAT	DHS_63	-	-
+	chr6	30890212	GCGGTAGAAGTCGGCTTGATG	DHS_63	-	-
+	chr6	30890220	GTCGGCTTGATGGGGCTTTT	DHS_63	-	-
+	chr6	30890221	GTCGGCTTGATGGGGCTTTTA	DHS_63	-	-
+	chr6	30890230	GTGGGGCTTTTAGGGAAACAA	DHS_63	-	-
+	chr6	30897948	GAAAAAACTCTAGATAATTAA	CTCF_25	-	-
+	chr6	30897996	GTTCTAATTCTTACTCCTAGC	CTCF_25	-	-
-	chr6	30898010	GCCTAGCTGGCTTTTTATACA	CTCF_25	-	-
+	chr6	30898011	GCTAGCTGGCTTTTTATACAC	CTCF_25	-	-
+	chr6	30898015	GCTGGCTTTTTATACACAGGC	CTCF_25	-	-
+	chr6	30898016	GTGGCTTTTTATACACAGGCA	CTCF_25	-	-
+	chr6	30898017	GGCTTTTTATACACAGGCAG	CTCF_25	-	-
+	chr6	30898031	GAGGCAGGGGAGACCCATCTT	CTCF_25	-	-
+	chr6	30898041	GACCCATCTTTGGAATTTTA	CTCF_25	-	-
+	chr6	30898051	GTGGAATTTTAAGGTTCAAAA	CTCF_25	-	-
+	chr6	30898071	GAGGAATTTGTCTGTACCTGA	CTCF_25	-	-
+	chr6	30902859	GTTCAGGACTAGGTCTTATA	DHS_64	-	-
+	chr6	30902866	GACTAGGTCTTATATGGCAGT	DHS_64	-	-
+	chr6	30902867	GCTAGGTCTTATATGGCAGTC	DHS_64	-	-
+	chr6	30902868	GTAGGTCTTATATGGCAGTCG	DHS_64	-	-
+	chr6	30902881	GCAGTCGGGGCTCCTGCCCT	DHS_64	-	-
+	chr6	30902916	GATGACTCACATCCAGCCCCA	DHS_64	-	-
+	chr6	30902957	GAGCCCAGGTGTGGTGCCGTT	DHS_64	-	-
+	chr6	30902966	GTGGTGCCGTTTGGTAACCA	DHS_64	-	-
+	chr6	30902967	GTGGTGCCGTTTGGTAACCAC	DHS_64	-	-
+	chr6	30902977	GTGGTAACCACGGGCCTCCCT	DHS_64	-	-
+	chr6	30904342	GACATAGCAGATTGTTTTGCT	DHS_65	CTCF_26	enhancer_9
+	chr6	30904343	GCATAGCAGATTGTTTTGCTT	DHS_65	CTCF_26	enhancer_9
+	chr6	30904344	GATAGCAGATTGTTTTGCTTG	DHS_65	CTCF_26	enhancer_9
+	chr6	30904350	GATTGTTTTGCTTGGGGCTT	DHS_65	CTCF_26	enhancer_9
+	chr6	30904360	GCTTGGGGCTTTGGCTTGGTC	DHS_65	CTCF_26	enhancer_9
+	chr6	30904361	GTTGGGGCTTTGGCTTGGTCT	DHS_65	CTCF_26	enhancer_9
+	chr6	30904377	GTCTGGGGCGTGCAGTTCCA	DHS_65	CTCF_26	enhancer_9
+	chr6	30904389	GCAGTTCCATGGGGGAACCTC	DHS_65	CTCF_26	enhancer_9
+	chr6	30904402	GAACCTCTGGCAATCCCACC	DHS_65	CTCF_26	enhancer_9
+	chr6	30904403	GAACCTCTGGCAATCCCACCA	DHS_65	CTCF_26	enhancer_9
+	chr6	30904404	GACCTCTGGCAATCCCACCAG	DHS_65	CTCF_26	enhancer_9
-	chr6	30904405	GCCTCTGGCAATCCCACCAGG	DHS_65	CTCF_26	enhancer_9
+	chr6	30904424	GGGGAGCCCTTTCCCCATCT	DHS_65	CTCF_26	enhancer_9
+	chr6	30904425	GGGAGCCCTTTCCCCATCTT	DHS_65	CTCF_26	enhancer_9
+	chr6	30904426	GGAGCCCTTTCCCCATCTTG	DHS_65	CTCF_26	enhancer_9
+	chr6	30904610	GATGACTGTAGTTACGTAGTG	DHS_65	CTCF_26	enhancer_9
+	chr6	30904631	GGCAGCAACACAGGGCAACT	DHS_65	CTCF_26	enhancer_9
+	chr6	30904632	GCAGCAACACAGGGCAACTT	DHS_65	CTCF_26	enhancer_9
+	chr6	30904633	GCAGCAACACAGGGCAACTTG	DHS_65	CTCF_26	enhancer_9
+	chr6	30904637	GAACACAGGGCAACTTGGGGC	DHS_65	CTCF_26	enhancer_9
-	chr6	30904681	GCCTCCCCAAATGCAGTCATT	DHS_65	CTCF_26	enhancer_9
+	chr6	30904740	GGGATCAAGATTCAGACTTA	DHS_65	CTCF_26	enhancer_9
+	chr6	30904753	GAGACTTAAGGACACCCTACC	DHS_65	CTCF_26	enhancer_9
+	chr6	30904760	GAGGACACCCTACCTGGACCT	DHS_65	CTCF_26	enhancer_9
+	chr6	30904765	GACCCTACCTGGACCTTGGCA	DHS_65	CTCF_26	enhancer_9
-	chr6	30904777	GCCTTGGCAAGGAGATTTTTA	DHS_65	CTCF_26	enhancer_9
+	chr6	30904780	GTGGCAAGGAGATTTTTACAG	DHS_65	CTCF_26	enhancer_9
+	chr6	30904788	GAGATTTTTACAGTGGGAATC	DHS_65	CTCF_26	enhancer_9
+	chr6	30905579	GATTCCTGTGGGTGTGTGTCT	DHS_66	CTCF_27	-
+	chr6	30914192	GACAAGAAAAGGCCTCTGGTA	DHS_67	-	-
-	chr6	30914203	GCCTCTGGTACGGTCCTGTCT	DHS_67	-	-
-	chr6	30914216	GCCTGTCTTGGACAGTTTCCC	DHS_67	-	-
+	chr6	30914228	GAGTTTCCCCGGCCACCCAGC	DHS_67	-	-
+	chr6	30914275	GCAAATGATCTCTTCTTATGC	DHS_67	-	-
+	chr6	30914288	GCTTATGCTGGGGAACCTTCT	DHS_67	-	-
+	chr6	30914293	GCTGGGGAACCTTCTAGGCA	DHS_67	-	-
+	chr6	30914297	GGGAACCTTCTAGGCATGGC	DHS_67	-	-
+	chr6	30914298	GGAACCTTCTAGGCATGGCA	DHS_67	-	-
+	chr6	30914299	GAACCTTCTAGGCATGGCAG	DHS_67	-	-
+	chr6	30919929	GCACTTCTTCCTTATATGCT	DHS_68	CTCF_28	enhancer_10
-	chr6	30919938	GCCTTATATGCTTGGAGTGTG	DHS_68	CTCF_28	enhancer_10
+	chr6	30919958	GTGGAATGCTGCTCACCACTC	DHS_68	CTCF_28	enhancer_10
+	chr6	30919959	GGAATGCTGCTCACCACTCT	DHS_68	CTCF_28	enhancer_10
+	chr6	30919967	GCTCACCACTCTGGGGCAGT	DHS_68	CTCF_28	enhancer_10
+	chr6	30919991	GACTGAGATAACTCCCTCCC	DHS_68	CTCF_28	enhancer_10
+	chr6	30920000	GAACTCCCTCCCTGGAATGTA	DHS_68	CTCF_28	enhancer_10
+	chr6	30920067	GTACCTTGCAGCAGCACAGC	DHS_68	CTCF_28	enhancer_10
+	chr6	30920068	GTACCTTGCAGCAGCACAGCT	DHS_68	CTCF_28	enhancer_10
+	chr6	30920078	GCAGCACAGCTGGGTTCTGGA	DHS_68	CTCF_28	enhancer_10
+	chr6	30920079	GAGCACAGCTGGGTTCTGGAT	DHS_68	CTCF_28	enhancer_10
+	chr6	30920100	GGCTCCATCTCTGAAAGAGA	DHS_68	CTCF_28	enhancer_10
+	chr6	30920101	GCTCCATCTCTGAAAGAGAG	DHS_68	CTCF_28	enhancer_10
+	chr6	30920108	GCTCTGAAAGAGAGGGGCAAA	DHS_68	CTCF_28	enhancer_10
+	chr6	30920114	GAAGAGAGGGGCAAAAGGGTT	DHS_68	CTCF_28	enhancer_10
+	chr6	30920120	GGGGCAAAAGGGTTGGGGAA	DHS_68	CTCF_28	enhancer_10
+	chr6	30920121	GGGCAAAAGGGTTGGGGAAG	DHS_68	CTCF_28	enhancer_10
+	chr6	30920143	GTAGCTGCCGGTCTTAGTGA	DHS_68	CTCF_28	enhancer_10
+	chr6	30920144	GTAGCTGCCGGTCTTAGTGAA	DHS_68	CTCF_28	enhancer_10
+	chr6	30920153	GTCTTAGTGAAGGGTCCCCG	DHS_68	CTCF_28	enhancer_10
+	chr6	30921133	GTGTGTCATGTTCCACACACG	DHS_69	-	-
+	chr6	30921134	GTGTCATGTTCCACACACGT	DHS_69	-	-
-	chr6	30923441	GCCTTTATGAAATCACCCAAA	DHS_70	-	-
+	chr6	30923973	GAGTCCTCCCACCCTCCGTCG	DHS_71	-	-
+	chr6	30923977	GCTCCCACCCTCCGTCGAGGT	DHS_71	-	-
+	chr6	30923978	GTCCCACCCTCCGTCGAGGTT	DHS_71	-	-
+	chr6	30923982	GACCCTCCGTCGAGGTTGGGC	DHS_71	-	-
+	chr6	30924064	GTTCTCTCTTAGCATAAGCCC	DHS_71	-	-
+	chr6	30925201	GATTTCTTGTCAAAAGTATAC	enhancer_11	-	-
+	chr6	30925259	GTATCCCTATAGTAAAGACAA	enhancer_11	-	-
+	chr6	30952113	GAAATGCAGGTACTCACAAGC	enhancer_12	-	-
+	chr6	30952114	GAATGCAGGTACTCACAAGCA	enhancer_12	-	-
+	chr6	30952119	GAGGTACTCACAAGCAGGGCC	enhancer_12	-	-
+	chr6	30952208	GTGGAACTTAATAGTTTTCAC	enhancer_12	-	-
+	chr6	30952226	GACAGGTATTCACGAGTCCTC	enhancer_12	-	-
+	chr6	30952282	GAGCACTGACCTTGACTTCCA	enhancer_12	-	-
+	chr6	30953599	GTCCTTCCATTTTCCAGTAAT	DHS_72	CTCF_29	enhancer_13
+	chr6	30953605	GCATTTTCCAGTAATTGGAGT	DHS_72	CTCF_29	enhancer_13
-	chr6	30953631	GCCTGTGCAGCAAGCGCCCCC	DHS_72	CTCF_29	enhancer_13
+	chr6	30953634	GTGCAGCAAGCGCCCCCAAG	DHS_72	CTCF_29	enhancer_13
+	chr6	30953654	GTGGCCTTCCTGTTCACTGTC	DHS_72	CTCF_29	enhancer_13
+	chr6	30953663	GTGTTCACTGTCCGGACCATA	DHS_72	CTCF_29	enhancer_13
+	chr6	30953694	GATACTCCGATAAGTTTATCA	DHS_72	CTCF_29	enhancer_13
+	chr6	30953698	GTCCGATAAGTTTATCAAGGC	DHS_72	CTCF_29	enhancer_13
-	chr6	30953699	GCCGATAAGTTTATCAAGGCC	DHS_72	CTCF_29	enhancer_13
-	chr6	30956561	GCCCTTCATCTCCTTTTGTCT	DHS_73	-	-
-	chr6	30956562	GCCTTCATCTCCTTTTGTCTG	DHS_73	-	-
+	chr6	30956575	GTTGTCTGGGGTTTCTTTGTC	DHS_73	-	-
+	chr6	30956576	GTGTCTGGGGTTTCTTTGTCT	DHS_73	-	-
+	chr6	30956656	GGCTGCTCAGTCCCTCTCTG	DHS_73	-	-
+	chr6	30956657	GCTGCTCAGTCCCTCTCTGC	DHS_73	-	-
+	chr6	30956658	GCTGCTCAGTCCCTCTCTGCG	DHS_73	-	-
+	chr6	30956667	GCCCTCTCTGCGGGGGCCTAG	DHS_73	-	-
+	chr6	30956672	GTCTGCGGGGGCCTAGAGGCT	DHS_73	-	-
+	chr6	30956677	GGGGGCCTAGAGGCTCGGTG	DHS_73	-	-
+	chr6	30956678	GGGGCCTAGAGGCTCGGTGA	DHS_73	-	-
+	chr6	30956679	GGGCCTAGAGGCTCGGTGAG	DHS_73	-	-
+	chr6	30956684	GTAGAGGCTCGGTGAGGGGAG	DHS_73	-	-
+	chr6	30956691	GTCGGTGAGGGGAGCGGGACT	DHS_73	-	-
+	chr6	30956725	GACATTGAAGCCAGCCGCAGC	DHS_73	-	-
+	chr6	30957720	GTCAGTTTCCAGTTTATTCAG	DHS_74	-	-
-	chr6	30957798	GCCGTCGCTTCTTACTCTCCC	DHS_74	-	-
+	chr6	30957826	GACCCAGCCTGCTCCTCCAG	DHS_74	-	-
+	chr6	30957842	GCCAGAGGCAGCTGCAGCTCC	DHS_74	-	-
+	chr6	30957847	GGCAGCTGCAGCTCCCGGAA	DHS_74	-	-
+	chr6	30957848	GCAGCTGCAGCTCCCGGAAG	DHS_74	-	-
-	chr6	30958315	GCCGTTGTCACTTGACTCCAC	DHS_75	-	-
+	chr6	30958316	GCGTTGTCACTTGACTCCACT	DHS_75	-	-
+	chr6	30958358	GCCACTCCTCCAGCCTAGAGC	DHS_75	-	-
+	chr6	30958359	GCACTCCTCCAGCCTAGAGCT	DHS_75	-	-
+	chr6	30958360	GACTCCTCCAGCCTAGAGCTG	DHS_75	-	-
+	chr6	30958365	GTCCAGCCTAGAGCTGGGGCG	DHS_75	-	-
+	chr6	30958369	GCCTAGAGCTGGGGCGAGGT	DHS_75	-	-
+	chr6	30958382	GCGAGGTGGGCATCACCACT	DHS_75	-	-
+	chr6	30958540	GATGTCCCACCAGGGTATGAC	DHS_76	Promoter_14	-
+	chr6	30958555	GATGACGGGCTGTAGCTTGCC	DHS_76	Promoter_14	-
+	chr6	30958559	GCGGGCTGTAGCTTGCCTGGC	DHS_76	Promoter_14	-
+	chr6	30958567	GAGCTTGCCTGGCAGGCCTGT	DHS_76	Promoter_14	-
+	chr6	30958568	GCTTGCCTGGCAGGCCTGTT	DHS_76	Promoter_14	-
+	chr6	30958621	GGGCTGTGGGCTGCCAGGTG	DHS_76	Promoter_14	-
+	chr6	30958629	GGCTGCCAGGTGAGGTGACT	DHS_76	Promoter_14	-
+	chr6	30958630	GCTGCCAGGTGAGGTGACTT	DHS_76	Promoter_14	-
-	chr6	30959507	GAGGGCGTTCTAAGGGACCCG	DHS_77	Promoter_15	-
+	chr6	30959562	GTGGGCCCGCCTTCAGGGTC	DHS_77	Promoter_15	-
+	chr6	30959563	GTGGGCCCGCCTTCAGGGTCT	DHS_77	Promoter_15	-
+	chr6	30959564	GGGCCCGCCTTCAGGGTCTG	DHS_77	Promoter_15	-
+	chr6	30959573	GTTCAGGGTCTGGGGCCTTCC	DHS_77	Promoter_15	-
+	chr6	30959578	GGTCTGGGGCCTTCCAGGTT	DHS_77	Promoter_15	-
+	chr6	30959585	GGCCTTCCAGGTTGGGTCGT	DHS_77	Promoter_15	-
+	chr6	30959586	GCCTTCCAGGTTGGGTCGTA	DHS_77	Promoter_15	-
-	chr6	30959587	GCCTTCCAGGTTGGGTCGTAG	DHS_77	Promoter_15	-
+	chr6	30959590	GTCCAGGTTGGGTCGTAGGGG	DHS_77	Promoter_15	-
+	chr6	30959591	GCCAGGTTGGGTCGTAGGGGC	DHS_77	Promoter_15	-
+	chr6	30959601	GTCGTAGGGGCGGGAGCGCAC	DHS_77	Promoter_15	-
+	chr6	30959613	GAGCGCACAGGCTGCGAGAG	DHS_77	Promoter_15	-
+	chr6	30959625	GTGCGAGAGAGGAGCAAAGGT	DHS_77	Promoter_15	-
+	chr6	30959632	GAGGAGCAAAGGTTGGTGGA	DHS_77	Promoter_15	-
+	chr6	30959663	GAGTCTGGGGCCTGGCTGGAC	DHS_77	Promoter_15	-
+	chr6	30959717	GTCTGGGCTAACTCCCGCAGC	DHS_77	Promoter_15	-
+	chr6	30959718	GCTGGGCTAACTCCCGCAGCT	DHS_77	Promoter_15	-
+	chr6	30959723	GCTAACTCCCGCAGCTGGGCT	DHS_77	Promoter_15	-
+	chr6	30960162	GAACGCGCGGCGAGAAGGCCG	DHS_78	Promoter_16	-
+	chr6	30960163	GACGCGCGGCGAGAAGGCCGA	DHS_78	Promoter_16	-
+	chr6	30960164	GCGCGCGGCGAGAAGGCCGAG	DHS_78	Promoter_16	-
+	chr6	30960167	GCGGCGAGAAGGCCGAGGGG	DHS_78	Promoter_16	-
+	chr6	30960168	GCGGCGAGAAGGCCGAGGGGA	DHS_78	Promoter_16	-
+	chr6	30960171	GCGAGAAGGCCGAGGGGAGGG	DHS_78	Promoter_16	-
+	chr6	30960230	GGCGAGGGGGAGGCGGCGCC	DHS_78	Promoter_16	-
+	chr6	30960252	GGCCCGAGCCGCCCCAGCCC	DHS_78	Promoter_16	-
-	chr6	30960270	GCCTGGCTCCTCTCCCCGGAA	DHS_78	Promoter_16	-
+	chr6	30960271	GCTGGCTCCTCTCCCCGGAAC	DHS_78	Promoter_16	-
+	chr6	30960292	GGCCCCCGACAGCTGCTCTC	DHS_78	Promoter_16	-
-	chr6	30960294	GCCCCCGACAGCTGCTCTCGG	DHS_78	Promoter_16	-
+	chr6	30960322	GTCCCGACACCCGAGCCCCGC	DHS_78	Promoter_16	-
+	chr6	30960561	GAGGACGTCCCGAGCCATGCT	DHS_79	-	-
-	chr6	30960569	GCCGAGCCATGCTTGGTCGTC	DHS_79	-	-
+	chr6	30960627	GCTGGCATACCGTCTGAAAAC	DHS_79	-	-
+	chr6	30960628	GTGGCATACCGTCTGAAAACC	DHS_79	-	-
+	chr6	30960629	GGCATACCGTCTGAAAACCG	DHS_79	-	-
+	chr6	30960630	GCATACCGTCTGAAAACCGG	DHS_79	-	-
+	chr6	30960633	GTACCGTCTGAAAACCGGGGG	DHS_79	-	-
+	chr6	30960634	GACCGTCTGAAAACCGGGGGC	DHS_79	-	-
+	chr6	30960640	GTGAAAACCGGGGGCGGGGAC	DHS_79	-	-
+	chr6	30960641	GAAAACCGGGGGCGGGGACT	DHS_79	-	-
+	chr6	30960695	GTTTTGAGCCTCCAGCCTTG	DHS_79	-	-
+	chr6	30960722	GTCCCCTCTCACTCAGTGCGG	DHS_79	-	-
+	chr6	30961969	GTCTCTGCCCCGGGCTCCTCT	DHS_80	enhancer_15	-
+	chr6	30961979	GGGCTCCTCTCGGCTCTGTG	DHS_80	enhancer_15	-
+	chr6	30961998	GTGGCTCTGATGACTCATCT	DHS_80	enhancer_15	-
+	chr6	30962003	GTCTGATGACTCATCTGGGAT	DHS_80	enhancer_15	-
+	chr6	30962011	GCTCATCTGGGATAGGCATGA	DHS_80	enhancer_15	-
+	chr6	30962020	GATAGGCATGAAGGTTACTT	DHS_80	enhancer_15	-
+	chr6	30962021	GATAGGCATGAAGGTTACTTA	DHS_80	enhancer_15	-
+	chr6	30962022	GTAGGCATGAAGGTTACTTAG	DHS_80	enhancer_15	-
-	chr6	30962054	GCCCGCTGTTCCCGAGAGAGG	DHS_80	enhancer_15	-
-	chr6	30962055	GCCGCTGTTCCCGAGAGAGGT	DHS_80	enhancer_15	-
+	chr6	30962056	GCGCTGTTCCCGAGAGAGGTG	DHS_80	enhancer_15	-
+	chr6	30962060	GTTCCCGAGAGAGGTGGGGT	DHS_80	enhancer_15	-
+	chr6	30962075	GGGGTTGGAGAGCGGCACCC	DHS_80	enhancer_15	-
+	chr6	30962096	GGAATTCCAAGCCAGTCTCC	DHS_80	enhancer_15	-
+	chr6	30962097	GAATTCCAAGCCAGTCTCCT	DHS_80	enhancer_15	-
+	chr6	30962104	GAAGCCAGTCTCCTGGGACTC	DHS_80	enhancer_15	-
+	chr6	30962134	GCTCCCCGGCGCTGGACCCTA	DHS_80	enhancer_15	-
+	chr6	30962135	GTCCCCGGCGCTGGACCCTAA	DHS_80	enhancer_15	-
+	chr6	30962156	GGACCAGGCGTGATGCCTTC	DHS_80	enhancer_15	-
-	chr6	30962214	GCCCCCTCAGCTGCTGCTTCA	DHS_80	enhancer_15	-
+	chr6	30962262	GATTCCTGCCCTAGTGCATTG	DHS_80	enhancer_15	-
-	chr6	30962265	GCCTGCCCTAGTGCATTGTGG	DHS_80	enhancer_15	-
+	chr6	30962272	GTAGTGCATTGTGGGAGCAGC	DHS_80	enhancer_15	-
+	chr6	30962290	GCTGGAGGAGGACAAAGGGA	DHS_80	enhancer_15	-
+	chr6	30962291	GCTGGAGGAGGACAAAGGGAT	DHS_80	enhancer_15	-
+	chr6	30962366	GTAGACCCGCCCTCGTCTCCA	DHS_80	enhancer_15	-
+	chr6	30968824	GTGTGGTGAACAATTCCTCTC	DHS_81	CTCF_30	Promoter_17
+	chr6	30968830	GAACAATTCCTCTCCGGCAC	DHS_81	CTCF_30	Promoter_17
+	chr6	30968831	GAACAATTCCTCTCCGGCACT	DHS_81	CTCF_30	Promoter_17
+	chr6	30968834	GAATTCCTCTCCGGCACTGGG	DHS_81	CTCF_30	Promoter_17
+	chr6	30968856	GCACCTTCCCGCCAGCCCCC	DHS_81	CTCF_30	Promoter_17
-	chr6	30968859	GCCTTCCCGCCAGCCCCCTGG	DHS_81	CTCF_30	Promoter_17
-	chr6	30968897	GCCCACCAACTTCAGCAGCTT	DHS_81	CTCF_30	Promoter_17
-	chr6	30968901	GCCAACTTCAGCAGCTTGGGT	DHS_81	CTCF_30	Promoter_17
-	chr6	30983700	GCGCGTGTAACCGGCTGGAGC	DHS_82	Promoter_18	-
-	chr6	30983706	GTAACGGCGCGTGTAACCGGC	DHS_82	Promoter_18	-
-	chr6	30983710	GCTGCTAACGGCGCGTGTAAC	DHS_82	Promoter_18	-
+	chr6	30983712	GTACACGCGCCGTTAGCAGCG	DHS_82	Promoter_18	-
+	chr6	30983713	GACACGCGCCGTTAGCAGCGT	DHS_82	Promoter_18	-
+	chr6	30983722	GTTAGCAGCGTGGGCGGAGT	DHS_82	Promoter_18	-
+	chr6	30983736	GCGGAGTTGGTTCTGCCTTCG	DHS_82	Promoter_18	-
+	chr6	30983746	GTCTGCCTTCGCGGAACCAAC	DHS_82	Promoter_18	-
+	chr6	30983758	GAACCAACTGGTCCAGCTTC	DHS_82	Promoter_18	-
-	chr6	30983786	GCCCCTCGCTCAATTAAAAGC	DHS_82	Promoter_18	-
+	chr6	30983812	GCTCTCCTTTCGGCTTCCCCA	DHS_82	Promoter_18	-
+	chr6	30983822	GGCTTCCCCACGGTGCCTTT	DHS_82	Promoter_18	-
+	chr6	30983823	GCTTCCCCACGGTGCCTTTC	DHS_82	Promoter_18	-
+	chr6	30983850	GTAGTCAGACGCGCTTCAGC	DHS_82	Promoter_18	-
+	chr6	30983858	GACGCGCTTCAGCCGGCTCTA	DHS_82	Promoter_18	-
+	chr6	30989612	GCTGGCCCACGCGCGGGAGC	DHS_83	Promoter_19	-
+	chr6	30989613	GCTGGCCCACGCGCGGGAGCT	DHS_83	Promoter_19	-
+	chr6	30989636	GCGTGCTCGTGTTCGAGAACT	DHS_83	Promoter_19	-
+	chr6	30989644	GTGTTCGAGAACTCGGCCAAG	DHS_83	Promoter_19	-
+	chr6	30989651	GAACTCGGCCAAGCGGCTCA	DHS_83	Promoter_19	-
+	chr6	30989654	GCTCGGCCAAGCGGCTCATGG	DHS_83	Promoter_19	-
+	chr6	30989663	GCGGCTCATGGTGGTGACCC	DHS_83	Promoter_19	-
+	chr6	30989667	GCTCATGGTGGTGACCCCGGC	DHS_83	Promoter_19	-
+	chr6	30989668	GTCATGGTGGTGACCCCGGCC	DHS_83	Promoter_19	-
+	chr6	30989692	GACAGCGACGTCAAGCGCTTT	DHS_83	Promoter_19	-
+	chr6	30989698	GACGTCAAGCGCTTTTGGAAG	DHS_83	Promoter_19	-
+	chr6	30989724	GAAACATAGCTCCTGAGAGCG	DHS_83	Promoter_19	-
+	chr6	30989725	GAACATAGCTCCTGAGAGCGC	DHS_83	Promoter_19	-
+	chr6	30989731	GCTCCTGAGAGCGCGGGACT	DHS_83	Promoter_19	-
+	chr6	30989737	GAGAGCGCGGGACTTGGACA	DHS_83	Promoter_19	-
+	chr6	30989744	GCGGGACTTGGACACGGACCT	DHS_83	Promoter_19	-
+	chr6	30989747	GACTTGGACACGGACCTCGG	DHS_83	Promoter_19	-
+	chr6	30989748	GACTTGGACACGGACCTCGGC	DHS_83	Promoter_19	-
+	chr6	30989751	GTGGACACGGACCTCGGCGGG	DHS_83	Promoter_19	-
+	chr6	30989757	GCGGACCTCGGCGGGCGGGAC	DHS_83	Promoter_19	-
-	chr6	30989761	GCCTCGGCGGGCGGGACTGGG	DHS_83	Promoter_19	-
+	chr6	30989763	GTCGGCGGGCGGGACTGGGCG	DHS_83	Promoter_19	-
+	chr6	30989880	GCCCCGTGGGGTTTGCCTTCG	DHS_84	Promoter_20	-
+	chr6	30989883	GCGTGGGGTTTGCCTTCGCGG	DHS_84	Promoter_20	-
+	chr6	30989897	GTCGCGGCGGACTCGCTCCTC	DHS_84	Promoter_20	-
+	chr6	30989911	GCTCCTCTGGTCTACAGCCTT	DHS_84	Promoter_20	-
+	chr6	30989916	GCTGGTCTACAGCCTTTGGAC	DHS_84	Promoter_20	-
+	chr6	30989920	GTCTACAGCCTTTGGACCGGT	DHS_84	Promoter_20	-
+	chr6	30989921	GCTACAGCCTTTGGACCGGTA	DHS_84	Promoter_20	-
+	chr6	30989926	GCCTTTGGACCGGTAGGGAG	DHS_84	Promoter_20	-
-	chr6	30989927	GCCTTTGGACCGGTAGGGAGA	DHS_84	Promoter_20	-
+	chr6	30989932	GGACCGGTAGGGAGAGGGTG	DHS_84	Promoter_20	-
+	chr6	30989964	GCTGCTGCGCATGCGCCGGC	DHS_84	Promoter_20	-
+	chr6	30989965	GCTGCTGCGCATGCGCCGGCC	DHS_84	Promoter_20	-
+	chr6	30989966	GTGCTGCGCATGCGCCGGCCG	DHS_84	Promoter_20	-
-	chr6	30989995	GCCCCATGCGCCGCGCGGCTC	DHS_84	Promoter_20	-
+	chr6	30989996	GCCCATGCGCCGCGCGGCTCC	DHS_84	Promoter_20	-
+	chr6	30989997	GCCATGCGCCGCGCGGCTCCA	DHS_84	Promoter_20	-
+	chr6	30990009	GCGGCTCCAGGGCCACGTTCC	DHS_84	Promoter_20	-
-	chr6	30990020	GCCACGTTCCAGGGTCGGGTT	DHS_84	Promoter_20	-
+	chr6	30990023	GCGTTCCAGGGTCGGGTTTGG	DHS_84	Promoter_20	-
+	chr6	30990047	GTTCCTCAGTCCCTGCCGCCG	DHS_84	Promoter_20	-
+	chr6	30991340	GTTCTCTTGGCAGGTTCCCCC	DHS_85	CTCF_31	enhancer_16
-	chr6	30991409	GCCTTGAAGTTCTTTCTGTTC	DHS_85	CTCF_31	enhancer_16
+	chr6	30991421	GTTCTGTTCTGGAGACAGTAG	DHS_85	CTCF_31	enhancer_16
+	chr6	30991422	GTCTGTTCTGGAGACAGTAGA	DHS_85	CTCF_31	enhancer_16
-	chr6	30991494	GCCTCTAGGCCCGGCTGCCCC	DHS_85	CTCF_31	enhancer_16
+	chr6	30991501	GCCCGGCTGCCCCAAGCTAC	DHS_85	CTCF_31	enhancer_16
+	chr6	30991502	GCCCGGCTGCCCCAAGCTACA	DHS_85	CTCF_31	enhancer_16
-	chr6	30991503	GCCGGCTGCCCCAAGCTACAG	DHS_85	CTCF_31	enhancer_16
+	chr6	30998148	GAGATCCCAAGGCACCTCCA	DHS_86	-	-
+	chr6	30998206	GTGCTTCTTCATCCCATGGTT	DHS_86	-	-
+	chr6	30998207	GCTTCTTCATCCCATGGTTC	DHS_86	-	-
+	chr6	30998212	GTTCATCCCATGGTTCGGGAC	DHS_86	-	-
+	chr6	30998216	GTCCCATGGTTCGGGACAGGC	DHS_86	-	-
+	chr6	30998217	GCCCATGGTTCGGGACAGGCA	DHS_86	-	-
+	chr6	30998221	GTGGTTCGGGACAGGCAGGGC	DHS_86	-	-
+	chr6	30998274	GACCCAAGAGACATCATCAG	DHS_86	-	-
+	chr6	30998275	GACCCAAGAGACATCATCAGT	DHS_86	-	-
+	chr6	30998276	GCCCAAGAGACATCATCAGTG	DHS_86	-	-
+	chr6	30998279	GAAGAGACATCATCAGTGGGG	DHS_86	-	-
+	chr6	30998439	GAATTGCCCCCTTCCATCCCC	DHS_87	-	-
-	chr6	30998447	GCCTTCCATCCCCAGGTGCTG	DHS_87	-	-
+	chr6	30998448	GCTTCCATCCCCAGGTGCTGC	DHS_87	-	-
+	chr6	30998472	GAAAGCTGAGAAGCGGAAATT	DHS_87	-	-
+	chr6	30998487	GAAATTTGGACCCTGCAGAGC	DHS_87	-	-
+	chr6	30998556	GCAGCTCTAGCTCACCACCTC	DHS_87	-	-
+	chr6	30998574	GTCTGGCTTCCTCTGCAACCC	DHS_87	-	-
+	chr6	30998580	GTTCCTCTGCAACCCAGGTCC	DHS_87	-	-
+	chr6	31018306	GATCTTTGAGCTGCCTCTGAA	DHS_88	CTCF_32	enhancer_17
+	chr6	31018364	GTGTCTGTCTCCCCTACCTTG	DHS_88	CTCF_32	enhancer_17
+	chr6	31018365	GTCTGTCTCCCCTACCTTGA	DHS_88	CTCF_32	enhancer_17
+	chr6	31018370	GTCTCCCCTACCTTGAGGGTC	DHS_88	CTCF_32	enhancer_17
+	chr6	31018446	GTCCTTCCCCTTCCTCTCAGG	DHS_88	CTCF_32	enhancer_17
+	chr6	31018458	GCTCTCAGGCGGATTGTCCAC	DHS_88	CTCF_32	enhancer_17
+	chr6	31018509	GTTAAGGAAGAGGAACCTGCA	DHS_88	CTCF_32	enhancer_17
+	chr6	31018510	GTAAGGAAGAGGAACCTGCAG	DHS_88	CTCF_32	enhancer_17
+	chr6	31018514	GAAGAGGAACCTGCAGGGGG	DHS_88	CTCF_32	enhancer_17
+	chr6	31018518	GAGGAACCTGCAGGGGGCGGA	DHS_88	CTCF_32	enhancer_17
+	chr6	31018519	GGAACCTGCAGGGGGCGGAA	DHS_88	CTCF_32	enhancer_17
+	chr6	31018559	GTCGCTCTGAGATTTGCTTC	DHS_88	CTCF_32	enhancer_17
+	chr6	31018560	GTCGCTCTGAGATTTGCTTCA	DHS_88	CTCF_32	enhancer_17
+	chr6	31018563	GCTCTGAGATTTGCTTCAGGG	DHS_88	CTCF_32	enhancer_17
+	chr6	31018590	GCTGAATTCCTGAGATTCCGA	DHS_88	CTCF_32	enhancer_17
+	chr6	31018591	GTGAATTCCTGAGATTCCGAT	DHS_88	CTCF_32	enhancer_17
+	chr6	31018592	GAATTCCTGAGATTCCGATG	DHS_88	CTCF_32	enhancer_17
+	chr6	31018600	GAGATTCCGATGGGGCCATG	DHS_88	CTCF_32	enhancer_17
-	chr6	31018606	GCCGATGGGGCCATGTGGGCG	DHS_88	CTCF_32	enhancer_17
+	chr6	31031427	GGCGCCGGAAGCTGCTGTCC	DHS_89	-	-
+	chr6	31031430	GCCGGAAGCTGCTGTCCCGG	DHS_89	-	-
+	chr6	31031441	GCTGTCCCGGCGGAGTCGCAG	DHS_89	-	-
+	chr6	31031442	GTGTCCCGGCGGAGTCGCAGC	DHS_89	-	-
+	chr6	31031443	GTCCCGGCGGAGTCGCAGCG	DHS_89	-	-
+	chr6	31031444	GTCCCGGCGGAGTCGCAGCGG	DHS_89	-	-
+	chr6	31031450	GCGGAGTCGCAGCGGGGGCTC	DHS_89	-	-
+	chr6	31031466	GCTCCGGTTCCCCGAGACTG	DHS_89	-	-
+	chr6	31031499	GTTCCTCCAGGTTCCGCTTTG	DHS_89	-	-
+	chr6	31031500	GTCCTCCAGGTTCCGCTTTGC	DHS_89	-	-
+	chr6	31031503	GTCCAGGTTCCGCTTTGCGGG	DHS_89	-	-
+	chr6	31031520	GGGCGGCTTCTGATCTCTTG	DHS_89	-	-
+	chr6	31031537	GTTGCGGACAGCTCAGATTAG	DHS_89	-	-
+	chr6	31031544	GCAGCTCAGATTAGTGGCTCG	DHS_89	-	-
-	chr6	31050322	GCCTCTTAGCACAACTCAAAT	CTCF_33	-	-
+	chr6	31050355	GCAAAACTTCATGAAACACTA	CTCF_33	-	-
+	chr6	31050382	GTTGACAAAGAAATGCCCTTC	CTCF_33	-	-
+	chr6	31050392	GAATGCCCTTCTGGAGAATGG	CTCF_33	-	-
+	chr6	31050413	GGCTGTAGAAACGCTCCCCC	CTCF_33	-	-
+	chr6	31050419	GAGAAACGCTCCCCCTGGTGT	CTCF_33	-	-
+	chr6	31050420	GAAACGCTCCCCCTGGTGTA	CTCF_33	-	-
+	chr6	31050421	GAAACGCTCCCCCTGGTGTAG	CTCF_33	-	-
+	chr6	31050424	GCGCTCCCCCTGGTGTAGGGG	CTCF_33	-	-
+	chr6	31050425	GCTCCCCCTGGTGTAGGGGA	CTCF_33	-	-
+	chr6	31050441	GGGAGGGTTTGACGTTCCAG	CTCF_33	-	-
-	chr6	31050464	GCCCCAGCCCTCCGCAGTTCT	CTCF_33	-	-
+	chr6	31050519	GCTGTGTTCTATTGTCCATCC	CTCF_33	-	-
-	chr6	31057703	GCCAGGACCCAACCTGTCACT	DHS_90	CTCF_34	enhancer_18
+	chr6	31057751	GAACTTCCCATCACAGCCACT	DHS_90	CTCF_34	enhancer_18
+	chr6	31058240	GCTATATGATCTGTGCAAAC	DHS_90	CTCF_34	enhancer_18
+	chr6	31058257	GAACCGGCTCCCCTTCTCCTT	DHS_90	CTCF_34	enhancer_18
+	chr6	31062099	GTCAGCACAGCCACCATCTC	DHS_91	-	-
+	chr6	31062165	GAGTTCCATACAACCTCCAG	DHS_91	-	-
+	chr6	31062166	GAGTTCCATACAACCTCCAGT	DHS_91	-	-
+	chr6	31084036	GTACTGTGTCTCAGAGTCGT	CTCF_35	-	-
+	chr6	31084049	GAGTCGTTGGATGCCAATGC	CTCF_35	-	-
+	chr6	31084067	GCAGGATCCCAGTGACCAGA	CTCF_35	-	-
-	chr6	31084075	GCCAGTGACCAGATGGAACGA	CTCF_35	-	-
+	chr6	31084085	GATGGAACGAGAGGGAGCTC	CTCF_35	-	-
+	chr6	31084102	GCTCAGGAGAGACCAGCTTGA	CTCF_35	-	-
+	chr6	31084133	GCTTGTTCCCACATTGCCAGT	CTCF_35	-	-
+	chr6	31084136	GTTCCCACATTGCCAGTAGG	CTCF_35	-	-
+	chr6	31084156	GAGGCATAAATTCCCCCTCAG	CTCF_35	-	-
+	chr6	31084175	GAGGACGTGCAGGAAAGAAG	CTCF_35	-	-
+	chr6	31084178	GACGTGCAGGAAAGAAGTGG	CTCF_35	-	-
+	chr6	31084179	GACGTGCAGGAAAGAAGTGGA	CTCF_35	-	-
+	chr6	31084199	GGGGAGAGCCCTTGAAATGG	CTCF_35	-	-
+	chr6	31084200	GGGAGAGCCCTTGAAATGGG	CTCF_35	-	-
+	chr6	31118616	GCATTCTGTGAAGGAACATCA	DHS_92	CTCF_36	-
+	chr6	31118659	GTGCAGCCCAGGTCCCCCTAG	DHS_92	CTCF_36	-
-	chr6	31118672	GCCCCTAGCGGTGCTTCTCTT	DHS_92	CTCF_36	-
+	chr6	31118679	GCGGTGCTTCTCTTCAGATTG	DHS_92	CTCF_36	-
+	chr6	31118692	GCAGATTGAGGACCTATTCTT	DHS_92	CTCF_36	-
-	chr6	31120239	GCCGCTTGATTATCTGCCCCC	CTCF_37	-	-
+	chr6	31120242	GCTTGATTATCTGCCCCCTAG	CTCF_37	-	-
+	chr6	31120262	GAGGAAGGGCACAATACTGTT	CTCF_37	-	-
+	chr6	31120267	GGGCACAATACTGTTTGGAG	CTCF_37	-	-
+	chr6	31120277	GCTGTTTGGAGAGGAGCTTGA	CTCF_37	-	-
+	chr6	31120278	GTGTTTGGAGAGGAGCTTGAT	CTCF_37	-	-
+	chr6	31120310	GTTTCTCTTACGTTCTTTAGT	CTCF_37	-	-
+	chr6	31120383	GTCTTGTAACTCCCCCATACC	CTCF_37	-	-
+	chr6	31120384	GCTTGTAACTCCCCCATACCT	CTCF_37	-	-
+	chr6	31120390	GACTCCCCCATACCTGGGATA	CTCF_37	-	-
+	chr6	31120409	GATGGAATAATGCATGGGTTA	CTCF_37	-	-
+	chr6	31120410	GTGGAATAATGCATGGGTTAA	CTCF_37	-	-
+	chr6	31120417	GATGCATGGGTTAAGGGCTTT	CTCF_37	-	-
+	chr6	31120418	GTGCATGGGTTAAGGGCTTTA	CTCF_37	-	-
+	chr6	31120419	GCATGGGTTAAGGGCTTTAG	CTCF_37	-	-
+	chr6	31120423	GGGTTAAGGGCTTTAGGGGC	CTCF_37	-	-
+	chr6	31120429	GAGGGCTTTAGGGGCTGGCTC	CTCF_37	-	-
-	chr6	31133843	GCAGGCCAGAAGCAGGAGGCT	CTCF_38	-	-
+	chr6	31133854	GCTTCTGGCCTGCTGCTTGA	CTCF_38	-	-
+	chr6	31133855	GCTTCTGGCCTGCTGCTTGAG	CTCF_38	-	-
+	chr6	31133856	GTTCTGGCCTGCTGCTTGAGG	CTCF_38	-	-
+	chr6	31133860	GGCCTGCTGCTTGAGGGGGA	CTCF_38	-	-
-	chr6	31133889	GTAGGTCAGGATGGCCAAAA	CTCF_38	-	-
+	chr6	31133891	GTTTTTGGCCATCCTGACCTA	CTCF_38	-	-
-	chr6	31133898	GACTTAATCCGTAGGTCAGGA	CTCF_38	-	-
-	chr6	31133902	GATGCACTTAATCCGTAGGTC	CTCF_38	-	-
-	chr6	31133907	GTCGACATGCACTTAATCCGT	CTCF_38	-	-
+	chr6	31133925	GTCGAAATTTTAACAAGTGG	CTCF_38	-	-
+	chr6	31133933	GTTTAACAAGTGGCGGCTTGC	CTCF_38	-	-
+	chr6	31133947	GCTTGCAGGATTAGCCAACT	CTCF_38	-	-
+	chr6	31133948	GCTTGCAGGATTAGCCAACTC	CTCF_38	-	-
+	chr6	31133952	GCAGGATTAGCCAACTCGGGC	CTCF_38	-	-
-	chr6	31133961	GCTTTAATGACCTGCCCGAGT	CTCF_38	-	-
+	chr6	31133979	GTAAAGCCTCGTTAATTCTTG	CTCF_38	-	-
-	chr6	31133984	GAATGACCGCAAGAATTAACG	CTCF_38	-	-
-	chr6	31134011	GAGCAGGGGTCAGTGCACAA	CTCF_38	-	-
-	chr6	31134025	GGATTTGCATCTTGGAGCAG	CTCF_38	-	-
-	chr6	31134026	GTGGATTTGCATCTTGGAGCA	CTCF_38	-	-
+	chr6	31134035	GAAGATGCAAATCCACAGCTT	CTCF_38	-	-
-	chr6	31134046	GTACAAACTGATCCAAAGCTG	CTCF_38	-	-
-	chr6	31134082	GTCTGTATCATGCATTACTTT	CTCF_38	-	-
+	chr6	31134087	GAGTAATGCATGATACAGATG	CTCF_38	-	-
-	chr6	31134196	GATGCATGAGTCAGGTACATA	CTCF_38	-	-
+	chr6	31134225	GTGTTCAGTATTCACCAGTAG	CTCF_38	-	-
+	chr6	31134226	GTTCAGTATTCACCAGTAGA	CTCF_38	-	-
+	chr6	31134229	GCAGTATTCACCAGTAGAGGG	CTCF_38	-	-
+	chr6	31134238	GCCAGTAGAGGGAGGACCTTC	CTCF_38	-	-
-	chr6	31134238	GCCAGAAGGTCCTCCCTCTAC	CTCF_38	-	-
-	chr6	31134253	GTGGTAACAGCGAAGTCCAGA	CTCF_38	-	-
+	chr6	31134264	GTCGCTGTTACCATAAACAAT	CTCF_38	-	-
+	chr6	31134298	GTGTGGATCACCATGAAAAGT	CTCF_38	-	-
-	chr6	31134307	GCAAGAGTGTCCAACTTTTCA	CTCF_38	-	-
+	chr6	31134345	GTGCTTTCCTTCCTCCAAACC	CTCF_38	-	-
-	chr6	31134351	GCCAATGCCTGGTTTGGAGGA	CTCF_38	-	-
+	chr6	31134351	GCCTTCCTCCAAACCAGGCAT	CTCF_38	-	-
+	chr6	31134361	GAACCAGGCATTGGCCCAGAG	CTCF_38	-	-
-	chr6	31134374	GCTAATGCTAGTGACCTCTCT	CTCF_38	-	-
-	chr6	31134375	GCTAATGCTAGTGACCTCTC	CTCF_38	-	-
+	chr6	31134430	GAGAGATGGCTCAAAAGGCTC	CTCF_38	-	-
+	chr6	31134431	GAGATGGCTCAAAAGGCTCA	CTCF_38	-	-
+	chr6	31134436	GGCTCAAAAGGCTCAGGGTG	CTCF_38	-	-
+	chr6	31134437	GCTCAAAAGGCTCAGGGTGT	CTCF_38	-	-
+	chr6	31134447	GCTCAGGGTGTGGGAAGTAAG	CTCF_38	-	-
+	chr6	31144721	GATCCATGGCAACAAATGGCC	DHS_93	CTCF_39	enhancer_19
+	chr6	31144725	GATGGCAACAAATGGCCTGGT	DHS_93	CTCF_39	enhancer_19
+	chr6	31144733	GAAATGGCCTGGTCGGAAGAG	DHS_93	CTCF_39	enhancer_19
+	chr6	31144771	GTGTCTTCCTGATGAAATGTC	DHS_93	CTCF_39	enhancer_19
+	chr6	31144795	GAGCCCCCTAGTGGCAATGAC	DHS_93	CTCF_39	enhancer_19
+	chr6	31144796	GCCCCCTAGTGGCAATGACC	DHS_93	CTCF_39	enhancer_19
-	chr6	31144799	GCCCTAGTGGCAATGACCGGG	DHS_93	CTCF_39	enhancer_19
+	chr6	31144802	GTAGTGGCAATGACCGGGTAG	DHS_93	CTCF_39	enhancer_19
+	chr6	31144817	GGTAGTGGCCCTCTGCGAGA	DHS_93	CTCF_39	enhancer_19
+	chr6	31144818	GTAGTGGCCCTCTGCGAGAT	DHS_93	CTCF_39	enhancer_19
+	chr6	31144829	GCTGCGAGATGGGCGCCTCTC	DHS_93	CTCF_39	enhancer_19
+	chr6	31144852	GAGATTGAGCGCCACTTCTGA	DHS_93	CTCF_39	enhancer_19
+	chr6	31144857	GAGCGCCACTTCTGAGGGCC	DHS_93	CTCF_39	enhancer_19
+	chr6	31144885	GTTGACTTGTTTTGCATCCCA	DHS_93	CTCF_39	enhancer_19
+	chr6	31144886	GTGACTTGTTTTGCATCCCAC	DHS_93	CTCF_39	enhancer_19
+	chr6	31144887	GACTTGTTTTGCATCCCACG	DHS_93	CTCF_39	enhancer_19
+	chr6	31146489	GCACTGGGGACCTGTATCCC	DHS_94	CTCF_40	enhancer_20
+	chr6	31146497	GACCTGTATCCCAGGTTTTC	DHS_94	CTCF_40	enhancer_20
+	chr6	31146498	GACCTGTATCCCAGGTTTTCA	DHS_94	CTCF_40	enhancer_20
+	chr6	31146503	GTATCCCAGGTTTTCAGGGCA	DHS_94	CTCF_40	enhancer_20
+	chr6	31146536	GATTTCCAGCAGACTAGTGTG	DHS_94	CTCF_40	enhancer_20
+	chr6	31146545	GAGACTAGTGTGAGGCATGCT	DHS_94	CTCF_40	enhancer_20
+	chr6	31146561	GTGCTAGGAAGCGAGCTGATG	DHS_94	CTCF_40	enhancer_20
+	chr6	31146587	GCGAGCTAATCCTGTCTGATG	DHS_94	CTCF_40	enhancer_20
+	chr6	31146598	GTGTCTGATGTGGCCACCTAC	DHS_94	CTCF_40	enhancer_20
+	chr6	31146608	GGCCACCTACAGGCATCAAC	DHS_94	CTCF_40	enhancer_20
+	chr6	31147579	GTTTATTGCTAGGATCTCCTC	enhancer_21	-	-
-	chr6	31147595	GCCTCAGGTAAGCTGTGCAGT	enhancer_21	-	-
+	chr6	31155601	GTGTTCCCACCTGGCCACTGA	DHS_95	CTCF_41	enhancer_22
+	chr6	31155602	GTTCCCACCTGGCCACTGAT	DHS_95	CTCF_41	enhancer_22
+	chr6	31155614	GCCACTGATGGGCCCTGCCGC	DHS_95	CTCF_41	enhancer_22
+	chr6	31155645	GAATCACAAACCATAGCTCC	DHS_95	CTCF_41	enhancer_22
-	chr6	31155760	GCCGCTTAATTCAATACAGAT	DHS_95	CTCF_41	enhancer_22
+	chr6	31155772	GATACAGATCAGTTAAGAGGA	DHS_95	CTCF_41	enhancer_22
+	chr6	31155780	GCAGTTAAGAGGATGGATTTA	DHS_95	CTCF_41	enhancer_22
+	chr6	31155788	GAGGATGGATTTACGGTTGAG	DHS_95	CTCF_41	enhancer_22
+	chr6	31159821	GTAAGCACCTACCAGCTGCAG	DHS_96	CTCF_42	enhancer_23
+	chr6	31159853	GGCCCTGAGGGAGATGTGTG	DHS_96	CTCF_42	enhancer_23
-	chr6	31159856	GCCTGAGGGAGATGTGTGTGG	DHS_96	CTCF_42	enhancer_23
+	chr6	31159864	GAGATGTGTGTGGCAGACTGC	DHS_96	CTCF_42	enhancer_23
+	chr6	31159886	GCCAAGTAAGTCCTTCTTTA	DHS_96	CTCF_42	enhancer_23
+	chr6	31159925	GTACTCAATGCCGCCTCCTGC	DHS_96	CTCF_42	enhancer_23
+	chr6	31159926	GACTCAATGCCGCCTCCTGCT	DHS_96	CTCF_42	enhancer_23
+	chr6	31159927	GCTCAATGCCGCCTCCTGCTG	DHS_96	CTCF_42	enhancer_23
+	chr6	31159931	GATGCCGCCTCCTGCTGGGGA	DHS_96	CTCF_42	enhancer_23
+	chr6	31159951	GAGGACACTTCACCCCTTTTA	DHS_96	CTCF_42	enhancer_23
+	chr6	31159962	GCCCCTTTTATGGAAGCCCAA	DHS_96	CTCF_42	enhancer_23
-	chr6	31159963	GCCCTTTTATGGAAGCCCAAC	DHS_96	CTCF_42	enhancer_23
+	chr6	31159967	GTTTATGGAAGCCCAACGGGA	DHS_96	CTCF_42	enhancer_23
+	chr6	31159975	GAGCCCAACGGGAAGGACTCA	DHS_96	CTCF_42	enhancer_23
+	chr6	31159976	GCCCAACGGGAAGGACTCAT	DHS_96	CTCF_42	enhancer_23
+	chr6	31159981	GACGGGAAGGACTCATGGGAC	DHS_96	CTCF_42	enhancer_23
+	chr6	31159982	GCGGGAAGGACTCATGGGACA	DHS_96	CTCF_42	enhancer_23
+	chr6	31160007	GGCTGCCCTGTCTCTTTTTT	DHS_96	CTCF_42	enhancer_23
+	chr6	31160051	GCTCACTAATCCAGTTCACTA	DHS_96	CTCF_42	enhancer_23
+	chr6	31160074	GTACGAAGCCACAATAAAGTT	DHS_96	CTCF_42	enhancer_23
+	chr6	31163362	GAGTGGAGATAAGCGGGGCTT	DHS_97	CTCF_43	-
+	chr6	31163380	GTTTGGAGCTCCTAAACTATT	DHS_97	CTCF_43	-
+	chr6	31163381	GTTGGAGCTCCTAAACTATTC	DHS_97	CTCF_43	-
+	chr6	31163411	GTTGACTCAGCGAGCTCAAAG	DHS_97	CTCF_43	-
+	chr6	31163412	GTGACTCAGCGAGCTCAAAGT	DHS_97	CTCF_43	-
+	chr6	31163415	GCTCAGCGAGCTCAAAGTGGG	DHS_97	CTCF_43	-
+	chr6	31163416	GTCAGCGAGCTCAAAGTGGGA	DHS_97	CTCF_43	-
+	chr6	31163420	GCGAGCTCAAAGTGGGAGGGC	DHS_97	CTCF_43	-
+	chr6	31163460	GAGATCGACAGCGCCATCTAC	DHS_97	CTCF_43	-
+	chr6	31163487	GAGCGCCCAACTCCCTTGCTA	DHS_97	CTCF_43	-
+	chr6	31163506	GAAGGATGATATCATTATGCT	DHS_97	CTCF_43	-
+	chr6	31163507	GAGGATGATATCATTATGCTA	DHS_97	CTCF_43	-
+	chr6	31178364	GTTTGCCAGGGCCTTCCCTTC	DHS_98	CTCF_44	-
+	chr6	31178365	GTTGCCAGGGCCTTCCCTTCA	DHS_98	CTCF_44	-
+	chr6	31186736	GTTCAGATTCCAGCACAATTC	DHS_99	CTCF_45	-
+	chr6	31186754	GTCTGGAACAGCTCTCCCACC	DHS_99	CTCF_45	-
+	chr6	31186758	GAACAGCTCTCCCACCTGGC	DHS_99	CTCF_45	-
+	chr6	31186759	GAACAGCTCTCCCACCTGGCC	DHS_99	CTCF_45	-
+	chr6	31186760	GACAGCTCTCCCACCTGGCCG	DHS_99	CTCF_45	-
+	chr6	31186771	GACCTGGCCGGGGTGAGACTG	DHS_99	CTCF_45	-
+	chr6	31186791	GAGGCTCCACCCTCAAGCACT	DHS_99	CTCF_45	-
+	chr6	31186792	GGCTCCACCCTCAAGCACTT	DHS_99	CTCF_45	-
+	chr6	31186811	GTGGGCACTGATCCTTTGTGA	DHS_99	CTCF_45	-
+	chr6	31186816	GACTGATCCTTTGTGAAGGAT	DHS_99	CTCF_45	-
+	chr6	31186817	GCTGATCCTTTGTGAAGGATG	DHS_99	CTCF_45	-
+	chr6	31186839	GATAGCAAGACAGCGTCTGC	DHS_99	CTCF_45	-
+	chr6	31186840	GATAGCAAGACAGCGTCTGCA	DHS_99	CTCF_45	-
+	chr6	31190066	GATTCCTTTGCAGCCAAGCAG	DHS_100	-	-
+	chr6	31190086	GAGGCTCTGAGAGGTGGCCTG	DHS_100	-	-
+	chr6	31190109	GTGGGGGGTGGGGCTCCTACA	DHS_100	-	-
+	chr6	31190138	GACAATCCACTCTGCCCTCCT	DHS_100	-	-
+	chr6	31190139	GCAATCCACTCTGCCCTCCTT	DHS_100	-	-
+	chr6	31190145	GACTCTGCCCTCCTTGGGATG	DHS_100	-	-
+	chr6	31190199	GTCTCAGGACTTAAGTCGCA	DHS_100	-	-
+	chr6	31190362	GTGTGAAGATGGAGAGACCAC	DHS_101	Promoter_21	-
-	chr6	31190381	GCCGGCAGCTCTGTTCTGCCA	DHS_101	Promoter_21	-
+	chr6	31190382	GCGGCAGCTCTGTTCTGCCAC	DHS_101	Promoter_21	-
+	chr6	31190387	GCTCTGTTCTGCCACAGGCT	DHS_101	Promoter_21	-
+	chr6	31190401	GCAGGCTGGGCCTCTTGATCT	DHS_101	Promoter_21	-
+	chr6	31190520	GTGGCCTCCTACTCAGCTGAC	DHS_101	Promoter_21	-
+	chr6	31190527	GCTACTCAGCTGACAGGAATC	DHS_101	Promoter_21	-
+	chr6	31190741	GGGGGACCCCACGGTGAATG	CTCF_46	-	-
+	chr6	31190746	GACCCCACGGTGAATGAGGAA	CTCF_46	-	-
-	chr6	31190747	GCCCCACGGTGAATGAGGAAT	CTCF_46	-	-
+	chr6	31190793	GATGAGAGAGGAGGGAAATGG	CTCF_46	-	-
+	chr6	31190803	GAGGGAAATGGCGGAAGGATC	CTCF_46	-	-
+	chr6	31190804	GGGAAATGGCGGAAGGATCT	CTCF_46	-	-
+	chr6	31190807	GAAATGGCGGAAGGATCTGGG	CTCF_46	-	-
+	chr6	31190812	GCGGAAGGATCTGGGAGGCC	CTCF_46	-	-
+	chr6	31190906	GAAACACAGCCCGCTTTTGA	CTCF_46	-	-
+	chr6	31190915	GCCCGCTTTTGAAGGAAAATG	CTCF_46	-	-
+	chr6	31190941	GACAGAGACCTCTAGAGGCGT	CTCF_46	-	-
+	chr6	31190988	GGAGACCCAGGACTCCAAGA	CTCF_46	-	-
-	chr6	31191024	GCCTAGTCCCCACAGTTTACT	CTCF_46	-	-
+	chr6	31191037	GTTTACTGAGCCATCTGTCC	CTCF_46	-	-
+	chr6	31191075	GGAGCCTGCTTCAACCTCTG	CTCF_46	-	-
+	chr6	31191076	GAGCCTGCTTCAACCTCTGA	CTCF_46	-	-
-	chr6	31191113	GCCTCACCCAGGGAATCATCT	CTCF_46	-	-
+	chr6	31191135	GCACTGAGGGAAGTGGCCAC	CTCF_46	-	-
+	chr6	31191141	GAGGGAAGTGGCCACAGGAAG	CTCF_46	-	-
-	chr6	31191151	GCCACAGGAAGGGGCTGAGAT	CTCF_46	-	-
+	chr6	31191152	GCACAGGAAGGGGCTGAGATA	CTCF_46	-	-
+	chr6	31191163	GCTGAGATAAGGGCCTTGAG	CTCF_46	-	-
+	chr6	31203970	GGGAGTGGATGACATTAGTG	DHS_102	CTCF_47	enhancer_24
+	chr6	31204017	GAACACCTGAGAGGAGTCTCT	DHS_102	CTCF_47	enhancer_24
+	chr6	31204068	GAGACCTGAGAGCCGCTACCT	DHS_102	CTCF_47	enhancer_24
-	chr6	31204085	GCCTTGGCTCTCAGCATTGCA	DHS_102	CTCF_47	enhancer_24
+	chr6	31204086	GCTTGGCTCTCAGCATTGCAC	DHS_102	CTCF_47	enhancer_24
+	chr6	31204096	GAGCATTGCACGGGAGTTTAG	DHS_102	CTCF_47	enhancer_24
+	chr6	31204132	GCCCCCTAAAGTCCCATCCCA	DHS_102	CTCF_47	enhancer_24
+	chr6	31204226	GATCCTGCCTGCCCCCATCAC	DHS_102	CTCF_47	enhancer_24
+	chr6	31204254	GAGATTATACTGCAAAAGGAA	DHS_102	CTCF_47	enhancer_24
+	chr6	31204258	GTATACTGCAAAAGGAAAGGT	DHS_102	CTCF_47	enhancer_24
+	chr6	31204286	GGTGGGGACTGGGGAATTTG	DHS_102	CTCF_47	enhancer_24
+	chr6	31204290	GGGACTGGGGAATTTGGGGA	DHS_102	CTCF_47	enhancer_24
+	chr6	31208728	GTCCACCGTTGGTTAAGGTC	weak_CTCF_1	-	-
+	chr6	31208729	GTCCACCGTTGGTTAAGGTCT	weak_CTCF_1	-	-
-	chr6	31208733	GCCCCAGACCTTAACCAACGG	weak_CTCF_1	-	-
+	chr6	31208843	GTCCCGGCAGAGGCATAGGCG	weak_CTCF_1	-	-
-	chr6	31209394	GAGCGCCAACGTAATAGCCT	weak_CTCF_1	-	-
+	chr6	31209560	GCGGCATTCGTGGACACATTG	weak_CTCF_1	-	-
+	chr6	31213338	GCTACTGATAGTTCCTGCCGC	DHS_103	CTCF_48	enhancer_25
+	chr6	31213346	GAGTTCCTGCCGCCGGCCACC	DHS_103	CTCF_48	enhancer_25
+	chr6	31213349	GTCCTGCCGCCGGCCACCAGG	DHS_103	CTCF_48	enhancer_25
+	chr6	31213356	GCCGGCCACCAGGTGGCAGA	DHS_103	CTCF_48	enhancer_25
-	chr6	31213357	GCCGGCCACCAGGTGGCAGAA	DHS_103	CTCF_48	enhancer_25
+	chr6	31213394	GCCCTGCCCCAGCGATCGCG	DHS_103	CTCF_48	enhancer_25
-	chr6	31213395	GCCCTGCCCCAGCGATCGCGC	DHS_103	CTCF_48	enhancer_25
-	chr6	31213402	GCCAGCGATCGCGCGGGCAGG	DHS_103	CTCF_48	enhancer_25
+	chr6	31213407	GATCGCGCGGGCAGGAAGAC	DHS_103	CTCF_48	enhancer_25
+	chr6	31213408	GATCGCGCGGGCAGGAAGACC	DHS_103	CTCF_48	enhancer_25
+	chr6	31213411	GCGCGGGCAGGAAGACCGGG	DHS_103	CTCF_48	enhancer_25
+	chr6	31213412	GCGCGGGCAGGAAGACCGGGT	DHS_103	CTCF_48	enhancer_25
+	chr6	31213419	GAGGAAGACCGGGTGGGAGGT	DHS_103	CTCF_48	enhancer_25
+	chr6	31213424	GACCGGGTGGGAGGTAGGTG	DHS_103	CTCF_48	enhancer_25
+	chr6	31213430	GTGGGAGGTAGGTGCGGCCG	DHS_103	CTCF_48	enhancer_25
+	chr6	31213435	GAGGTAGGTGCGGCCGAGGCC	DHS_103	CTCF_48	enhancer_25
+	chr6	31213438	GTAGGTGCGGCCGAGGCCTGG	DHS_103	CTCF_48	enhancer_25
+	chr6	31213443	GCGGCCGAGGCCTGGAGGCG	DHS_103	CTCF_48	enhancer_25
+	chr6	31213447	GCCGAGGCCTGGAGGCGAGGT	DHS_103	CTCF_48	enhancer_25
+	chr6	31213461	GCGAGGTAGGAGAGTAGGCTT	DHS_103	CTCF_48	enhancer_25
+	chr6	31213471	GAGTAGGCTTAGGCTGTCAG	DHS_103	CTCF_48	enhancer_25
+	chr6	31213480	GTAGGCTGTCAGAGGAAAAAA	DHS_103	CTCF_48	enhancer_25
+	chr6	31213491	GAGGAAAAAACGGGCGATGTG	DHS_103	CTCF_48	enhancer_25
+	chr6	31213502	GGCGATGTGAGGACTAAGTA	DHS_103	CTCF_48	enhancer_25
+	chr6	31213510	GAGGACTAAGTATGGATCTC	DHS_103	CTCF_48	enhancer_25
+	chr6	31213513	GACTAAGTATGGATCTCAGG	DHS_103	CTCF_48	enhancer_25
+	chr6	31213520	GTATGGATCTCAGGAGGGGAC	DHS_103	CTCF_48	enhancer_25
+	chr6	31213545	GATATTGAGAACACCACCTTA	DHS_103	CTCF_48	enhancer_25
+	chr6	31213546	GTATTGAGAACACCACCTTAC	DHS_103	CTCF_48	enhancer_25
+	chr6	31213564	GACGGGTTCAGAATAAAACCG	DHS_103	CTCF_48	enhancer_25
+	chr6	31213565	GCGGGTTCAGAATAAAACCGA	DHS_103	CTCF_48	enhancer_25
+	chr6	31213572	GAGAATAAAACCGAGGGAATG	DHS_103	CTCF_48	enhancer_25
+	chr6	31213578	GAAACCGAGGGAATGAGGAAG	DHS_103	CTCF_48	enhancer_25
+	chr6	31213585	GGGAATGAGGAAGAGGTTTA	DHS_103	CTCF_48	enhancer_25
+	chr6	31215149	GAATGGGAGCAAACCACGCGA	DHS_104	enhancer_26	-
+	chr6	31215156	GCAAACCACGCGATGGGCGT	DHS_104	enhancer_26	-
+	chr6	31215157	GCAAACCACGCGATGGGCGTT	DHS_104	enhancer_26	-
-	chr6	31215164	GCTTCCCAACGCCCATCGCG	DHS_104	enhancer_26	-
+	chr6	31215184	GACCGTAATTACAGGGTTGGG	DHS_104	enhancer_26	-
+	chr6	31215516	GTTTGCATCAGTCCTGCCAA	DHS_104	enhancer_26	-
+	chr6	31215522	GATCAGTCCTGCCAATGGCTC	DHS_104	enhancer_26	-
-	chr6	31215528	GCCTGCCAATGGCTCCGGAAG	DHS_104	enhancer_26	-
+	chr6	31215536	GTGGCTCCGGAAGAAGCTGCC	DHS_104	enhancer_26	-
+	chr6	31215593	GAATCCACCTATCCGCCTCT	DHS_104	enhancer_26	-
-	chr6	31215600	GCCTATCCGCCTCTAGGACCT	DHS_104	enhancer_26	-
+	chr6	31218119	GCTCACAATCTCCAAGAGAGA	DHS_105	-	-
+	chr6	31218126	GTCTCCAAGAGAGATGGCTGC	DHS_105	-	-
+	chr6	31218127	GCTCCAAGAGAGATGGCTGCA	DHS_105	-	-
-	chr6	31218129	GCCAAGAGAGATGGCTGCAGG	DHS_105	-	-
+	chr6	31218170	GAAATAACATTTCCAAACAA	DHS_105	-	-
-	chr6	31218182	GCCAAACAATGGCTCCTTCTG	DHS_105	-	-
+	chr6	31218218	GAGCAGAATTCAGACTCAGC	DHS_105	-	-
+	chr6	31218230	GACTCAGCTGGTATCCCCCA	DHS_105	-	-
+	chr6	31218799	GCAGATTTCTTCTTATCCAGT	DHS_106	enhancer_27	-
+	chr6	31218800	GAGATTTCTTCTTATCCAGTA	DHS_106	enhancer_27	-
+	chr6	31218804	GTTCTTCTTATCCAGTAGGGA	DHS_106	enhancer_27	-
+	chr6	31218838	GACAGTCGCTGCTGCTTGTAA	DHS_106	enhancer_27	-
+	chr6	31218839	GCAGTCGCTGCTGCTTGTAAC	DHS_106	enhancer_27	-
+	chr6	31218863	GAGGAGACCTTCCTGCTGCA	DHS_106	enhancer_27	-
+	chr6	31218866	GAGACCTTCCTGCTGCAAGG	DHS_106	enhancer_27	-
+	chr6	31218871	GCTTCCTGCTGCAAGGTGGCC	DHS_106	enhancer_27	-
+	chr6	31218872	GTTCCTGCTGCAAGGTGGCCT	DHS_106	enhancer_27	-
+	chr6	31218876	GTGCTGCAAGGTGGCCTGGGA	DHS_106	enhancer_27	-
+	chr6	31218897	GGAGAGGGTTAAACCTAGCC	DHS_106	enhancer_27	-
+	chr6	31218941	GTCTTTCCACACCTCTAGCCC	DHS_106	enhancer_27	-
+	chr6	31218953	GTCTAGCCCAGGAACCAGCCC	DHS_106	enhancer_27	-
+	chr6	31219004	GTCCTGTCTCCTACCAGCATG	DHS_106	enhancer_27	-
+	chr6	31219037	GTCTCTAGCTCCTGCAAGCGC	DHS_106	enhancer_27	-
+	chr6	31219038	GCTCTAGCTCCTGCAAGCGCC	DHS_106	enhancer_27	-
+	chr6	31219064	GTCGCTGCCCCTCCTCCTTC	DHS_106	enhancer_27	-
-	chr6	31233700	GGCTAGCGTACAGGGGGCGA	DHS_107	Promoter_22	-
-	chr6	31233706	GAGAGCCGGCTAGCGTACAGG	DHS_107	Promoter_22	-
-	chr6	31233707	GTAGAGCCGGCTAGCGTACAG	DHS_107	Promoter_22	-
-	chr6	31233708	GTAGAGCCGGCTAGCGTACA	DHS_107	Promoter_22	-
-	chr6	31233709	GAGTAGAGCCGGCTAGCGTAC	DHS_107	Promoter_22	-
-	chr6	31233919	GGGGGCTCTCGCGGTTGGTA	DHS_107	Promoter_22	-
-	chr6	31233992	GCCTTGCGCAGGCGCGGTCAG	DHS_107	Promoter_22	-
-	chr6	31233992	GCTGACCGCGCCTGCGCAAGG	DHS_107	Promoter_22	-
+	chr6	31234023	GAAGTCCTATTTCACTCTGTT	DHS_107	Promoter_22	-
+	chr6	31234029	GTATTTCACTCTGTTGGGAGG	DHS_107	Promoter_22	-
+	chr6	31234030	GATTTCACTCTGTTGGGAGGA	DHS_107	Promoter_22	-
+	chr6	31234055	GAAAGGTGTACGCAGGCGCAG	DHS_107	Promoter_22	-
+	chr6	31234068	GGCGCAGTGGCGTCTAAATT	DHS_107	Promoter_22	-
+	chr6	31234069	GCGCAGTGGCGTCTAAATTT	DHS_107	Promoter_22	-
+	chr6	31234086	GTTTGGGCCCACTAAATGCGT	DHS_107	Promoter_22	-
+	chr6	31234104	GTCGGAGCATCTCCGCGCCC	DHS_107	Promoter_22	-
+	chr6	31234107	GGAGCATCTCCGCGCCCAGG	DHS_107	Promoter_22	-
+	chr6	31234123	GCAGGCGGCTCCTCCTCACTG	DHS_107	Promoter_22	-
+	chr6	31234131	GTCCTCCTCACTGCGGCAACC	DHS_107	Promoter_22	-
-	chr6	31234132	GCCTCCTCACTGCGGCAACCC	DHS_107	Promoter_22	-
+	chr6	31234168	GTAATCAGAAAAAGTGGAAGG	DHS_107	Promoter_22	-
+	chr6	31234237	GTGGCCAATCGGGAACGGCAC	DHS_107	Promoter_22	-
+	chr6	31234239	GCCAATCGGGAACGGCACGG	DHS_107	Promoter_22	-
+	chr6	31234518	GGGTATGCCTTGCATGATCG	DHS_108	-	-
+	chr6	31234519	GGTATGCCTTGCATGATCGC	DHS_108	-	-
+	chr6	31234520	GTATGCCTTGCATGATCGCG	DHS_108	-	-
+	chr6	31234557	GTTTATCCCACCTAGAGAAGC	DHS_108	-	-
+	chr6	31234558	GTTATCCCACCTAGAGAAGCC	DHS_108	-	-
+	chr6	31234565	GACCTAGAGAAGCCGGGAAGT	DHS_108	-	-
-	chr6	31234566	GCCTAGAGAAGCCGGGAAGTA	DHS_108	-	-
+	chr6	31234567	GCTAGAGAAGCCGGGAAGTAG	DHS_108	-	-
+	chr6	31234573	GAAGCCGGGAAGTAGGGGTTT	DHS_108	-	-
+	chr6	31234586	GGGGTTTAGGTCCAATTTGT	DHS_108	-	-
+	chr6	31234597	GCCAATTTGTTGGAGTACTTA	DHS_108	-	-
+	chr6	31234619	GACTCGTTTGCACTTTCTTT	DHS_108	-	-
+	chr6	31234620	GACTCGTTTGCACTTTCTTTT	DHS_108	-	-
+	chr6	31234621	GCTCGTTTGCACTTTCTTTTG	DHS_108	-	-
+	chr6	31234622	GTCGTTTGCACTTTCTTTTGG	DHS_108	-	-
+	chr6	31234647	GACAGTGGATTCATTGCCCT	DHS_108	-	-
+	chr6	31234650	GAGTGGATTCATTGCCCTCGG	DHS_108	-	-
+	chr6	31235180	GATGGATGCCTGAAGTGGAAG	DHS_109	CTCF_49	-
+	chr6	31235192	GAGTGGAAGAGGTGGTGCAGA	DHS_109	CTCF_49	-
+	chr6	31235234	GTGCTTCCAACTGCTGCGCAT	DHS_109	CTCF_49	-
+	chr6	31235235	GCTTCCAACTGCTGCGCATA	DHS_109	CTCF_49	-
+	chr6	31235236	GCTTCCAACTGCTGCGCATAG	DHS_109	CTCF_49	-
+	chr6	31235237	GTTCCAACTGCTGCGCATAGG	DHS_109	CTCF_49	-
+	chr6	31235240	GCAACTGCTGCGCATAGGGGG	DHS_109	CTCF_49	-
+	chr6	31235244	GTGCTGCGCATAGGGGGCGGC	DHS_109	CTCF_49	-
+	chr6	31235245	GCTGCGCATAGGGGGCGGCA	DHS_109	CTCF_49	-
+	chr6	31235246	GCTGCGCATAGGGGGCGGCAG	DHS_109	CTCF_49	-
+	chr6	31235249	GCGCATAGGGGGCGGCAGGGG	DHS_109	CTCF_49	-
+	chr6	31235279	GTACACCTTCCACCCCCCCGC	DHS_109	CTCF_49	-
+	chr6	31235280	GACACCTTCCACCCCCCCGCC	DHS_109	CTCF_49	-
+	chr6	31235281	GCACCTTCCACCCCCCCGCCG	DHS_109	CTCF_49	-
+	chr6	31235285	GTTCCACCCCCCCGCCGGGGC	DHS_109	CTCF_49	-
+	chr6	31235302	GGCTGGCTGCACCTATCGCT	DHS_109	CTCF_49	-
+	chr6	31235303	GCTGGCTGCACCTATCGCTT	DHS_109	CTCF_49	-
+	chr6	31235310	GCACCTATCGCTTGGGCCAC	DHS_109	CTCF_49	-
+	chr6	31235311	GCACCTATCGCTTGGGCCACA	DHS_109	CTCF_49	-
+	chr6	31237355	GTTGCTGCCATTACCATCCCA	DHS_110	-	-
+	chr6	31237361	GCCATTACCATCCCACGGTCT	DHS_110	-	-
+	chr6	31237362	GCATTACCATCCCACGGTCTA	DHS_110	-	-
+	chr6	31237363	GATTACCATCCCACGGTCTAG	DHS_110	-	-
+	chr6	31237373	GCACGGTCTAGGGGAGAAGCC	DHS_110	-	-
+	chr6	31237374	GACGGTCTAGGGGAGAAGCCC	DHS_110	-	-
+	chr6	31237378	GTCTAGGGGAGAAGCCCGGGT	DHS_110	-	-
+	chr6	31237391	GCCCGGGTTGGGGCTGGTTTC	DHS_110	-	-
+	chr6	31237410	GCCGGCCTATGCTGCCCTCCC	DHS_110	-	-
+	chr6	31237411	GCGGCCTATGCTGCCCTCCCA	DHS_110	-	-
+	chr6	31237413	GCCTATGCTGCCCTCCCAGG	DHS_110	-	-
-	chr6	31237424	GCCTCCCAGGGGGCTCCACAG	DHS_110	-	-
+	chr6	31237480	GACACTGATCCTAAACTCCAT	DHS_110	-	-
+	chr6	31238221	GACTTCCTTCAGAAATCGACG	DHS_111	CTCF_50	enhancer_28
+	chr6	31238231	GAAATCGACGTGGCCGTCCT	DHS_111	CTCF_50	enhancer_28
+	chr6	31238256	GTACCCAGTGAGCGCTCCCA	DHS_111	CTCF_50	enhancer_28
-	chr6	31238272	GCCCATGGCTCCCCCTGCAGT	DHS_111	CTCF_50	enhancer_28
+	chr6	31238278	GCTCCCCCTGCAGTTGGGGG	DHS_111	CTCF_50	enhancer_28
+	chr6	31238279	GCTCCCCCTGCAGTTGGGGGC	DHS_111	CTCF_50	enhancer_28
+	chr6	31238280	GTCCCCCTGCAGTTGGGGGCG	DHS_111	CTCF_50	enhancer_28
-	chr6	31238328	GCCTGCCCCAGGAAGAGACAG	DHS_111	CTCF_50	enhancer_28
+	chr6	31238360	GAGTGTGATGGCTGTGACGTC	DHS_111	CTCF_50	enhancer_28
+	chr6	31244940	GATGAGATAATGATGTATAAA	DHS_112	-	-
+	chr6	31244954	GTATAAACGGAGCACACAGCC	DHS_112	-	-
+	chr6	31244962	GAGCACACAGCCAGGCACTT	DHS_112	-	-
+	chr6	31244968	GACAGCCAGGCACTTAGGAAG	DHS_112	-	-
+	chr6	31244998	GTTGCCAGCCATTATCATTCA	DHS_112	-	-
+	chr6	31245024	GAGCAGTGACCTCCTGCGAAG	DHS_112	-	-
+	chr6	31245028	GTGACCTCCTGCGAAGAGGT	DHS_112	-	-
+	chr6	31245029	GTGACCTCCTGCGAAGAGGTT	DHS_112	-	-
+	chr6	31245030	GACCTCCTGCGAAGAGGTTG	DHS_112	-	-
+	chr6	31245038	GCGAAGAGGTTGGGGCTTCT	DHS_112	-	-
+	chr6	31245072	GACCAGTCACACCTTTCTGTG	DHS_112	-	-
+	chr6	31245080	GCACCTTTCTGTGAGGTCTCA	DHS_112	-	-
+	chr6	31246407	GGTGAAATGAGGGCTTGCGA	DHS_113	Promoter_23	-
+	chr6	31246408	GTGAAATGAGGGCTTGCGAA	DHS_113	Promoter_23	-
+	chr6	31246462	GCACCCACTAGCCTTGACCTC	DHS_113	Promoter_23	-
+	chr6	31246475	GTGACCTCTGGCCCCGCCCCC	DHS_113	Promoter_23	-
+	chr6	31246479	GCTCTGGCCCCGCCCCCTGGA	DHS_113	Promoter_23	-
+	chr6	31246480	GTCTGGCCCCGCCCCCTGGAT	DHS_113	Promoter_23	-
+	chr6	31246483	GGCCCCGCCCCCTGGATGGG	DHS_113	Promoter_23	-
-	chr6	31246485	GCCCCGCCCCCTGGATGGGTG	DHS_113	Promoter_23	-
+	chr6	31246486	GCCCGCCCCCTGGATGGGTGG	DHS_113	Promoter_23	-
+	chr6	31246519	GGGGGGAGAAACTGAGGCGA	DHS_113	Promoter_23	-
+	chr6	31246534	GGCGAAGGATGTTTGCCTAA	DHS_113	Promoter_23	-
+	chr6	31246540	GGATGTTTGCCTAATGGTGG	DHS_113	Promoter_23	-
+	chr6	31246546	GTTGCCTAATGGTGGTGGCAA	DHS_113	Promoter_23	-
+	chr6	31246902	GCCGCCCAGTGTCATGATTAA	DHS_114	-	-
+	chr6	31246947	GTCAACTCCCAACCCGCTCCC	DHS_114	-	-
+	chr6	31246959	GCCGCTCCCTGGCACTCTCTC	DHS_114	-	-
+	chr6	31247578	GAACTCAGACATCTAATACCA	DHS_115	enhancer_29	-
+	chr6	31247582	GCAGACATCTAATACCACGGT	DHS_115	enhancer_29	-
+	chr6	31247630	GTGGCCCAGGCCTCCAGCCCT	DHS_115	enhancer_29	-
+	chr6	31247640	GCTCCAGCCCTAGGCCCTGGG	DHS_115	enhancer_29	-
+	chr6	31247651	GGCCCTGGGTGGGGAAAACC	DHS_115	enhancer_29	-
+	chr6	31247652	GCCCTGGGTGGGGAAAACCA	DHS_115	enhancer_29	-
+	chr6	31247657	GGGTGGGGAAAACCAGGGGG	DHS_115	enhancer_29	-
+	chr6	31247658	GGTGGGGAAAACCAGGGGGT	DHS_115	enhancer_29	-
+	chr6	31247703	GACTTCAGGTTCAAAGAAGCC	DHS_115	enhancer_29	-
+	chr6	31247704	GCTTCAGGTTCAAAGAAGCCT	DHS_115	enhancer_29	-
+	chr6	31247708	GAGGTTCAAAGAAGCCTGGGA	DHS_115	enhancer_29	-
+	chr6	31247715	GAAGAAGCCTGGGAGGGACTG	DHS_115	enhancer_29	-
+	chr6	31247734	GGGGGAAGGGGGCAGGACAA	DHS_115	enhancer_29	-
+	chr6	31247744	GGCAGGACAATGGCCTTGGC	DHS_115	enhancer_29	-
+	chr6	31247754	GTGGCCTTGGCTGGACAATCC	DHS_115	enhancer_29	-
+	chr6	31247764	GTGGACAATCCCGGTCCCCAG	DHS_115	enhancer_29	-
+	chr6	31247765	GGACAATCCCGGTCCCCAGA	DHS_115	enhancer_29	-
+	chr6	31247766	GACAATCCCGGTCCCCAGAG	DHS_115	enhancer_29	-
+	chr6	31247767	GACAATCCCGGTCCCCAGAGG	DHS_115	enhancer_29	-
+	chr6	31247805	GACAAGTGCTCAACCCTTGAA	DHS_115	enhancer_29	-
+	chr6	31247806	GCAAGTGCTCAACCCTTGAAT	DHS_115	enhancer_29	-
+	chr6	31247815	GAACCCTTGAATGGGCCTGGA	DHS_115	enhancer_29	-
+	chr6	31247824	GATGGGCCTGGATGGCTCCCC	DHS_115	enhancer_29	-
+	chr6	31247825	GTGGGCCTGGATGGCTCCCCT	DHS_115	enhancer_29	-
+	chr6	31247826	GGGCCTGGATGGCTCCCCTG	DHS_115	enhancer_29	-
-	chr6	31247872	GCCAGTCCCAATCCCCTCACA	DHS_115	enhancer_29	-
-	chr6	31247899	GCCCTTCAGAGACGCTAAAAG	DHS_115	enhancer_29	-
+	chr6	31248372	GAGGGCTCCCCACAGCTTCGA	DHS_116	-	-
-	chr6	31248379	GCCCACAGCTTCGAAGGCCAG	DHS_116	-	-
+	chr6	31248380	GCCACAGCTTCGAAGGCCAGA	DHS_116	-	-
+	chr6	31248385	GCTTCGAAGGCCAGAAGGCC	DHS_116	-	-
+	chr6	31248390	GAAGGCCAGAAGGCCAGGTC	DHS_116	-	-
+	chr6	31248425	GACCTCTGTCGACTTAAGTA	DHS_116	-	-
+	chr6	31248439	GTAAGTAAGGCTTCTCATTGC	DHS_116	-	-
+	chr6	31248502	GTGGCTCTATCTGCCTTCTA	DHS_116	-	-
+	chr6	31248503	GTGGCTCTATCTGCCTTCTAA	DHS_116	-	-
+	chr6	31248504	GGCTCTATCTGCCTTCTAAG	DHS_116	-	-
+	chr6	31248508	GCTATCTGCCTTCTAAGGGGA	DHS_116	-	-
+	chr6	31248519	GCTAAGGGGATGGGTGTCCCG	DHS_116	-	-
+	chr6	31248836	GTCCCCAGGACAGAACCATCA	DHS_117	-	-
+	chr6	31248889	GCCAAGAAGACGGCCTCTCAG	DHS_117	-	-
+	chr6	31248920	GGGCAGGCCTGGGATTTGGC	DHS_117	-	-
-	chr6	31248971	GCCATCCTCCAGGTTCCCCAA	DHS_117	-	-
+	chr6	31250307	GCACACCTGTGAAGAGAAATG	enhancer_30	-	-
+	chr6	31250344	GAGTGGTGTTCAATGAGAAGT	enhancer_30	-	-
+	chr6	31250350	GTTCAATGAGAAGTTGGCAT	enhancer_30	-	-
+	chr6	31250392	GCTACCTCCAAGCATCCTTCC	enhancer_30	-	-
+	chr6	31250393	GTACCTCCAAGCATCCTTCCT	enhancer_30	-	-
+	chr6	31250394	GACCTCCAAGCATCCTTCCTG	enhancer_30	-	-
+	chr6	31250405	GTCCTTCCTGGGGAATCTGGC	enhancer_30	-	-
+	chr6	31250437	GAAGTTTGATCAAGAGATAT	enhancer_30	-	-
+	chr6	31250440	GTTTGATCAAGAGATATAGG	enhancer_30	-	-
+	chr6	31250443	GTGATCAAGAGATATAGGAGG	enhancer_30	-	-
+	chr6	31250447	GCAAGAGATATAGGAGGAGGC	enhancer_30	-	-
+	chr6	31250448	GAAGAGATATAGGAGGAGGCC	enhancer_30	-	-
-	chr6	31256188	GACGCGGGTGCTGAGTAGTAG	DHS_118	-	-
+	chr6	31256189	GTACTACTCAGCACCCGCGTG	DHS_118	-	-
-	chr6	31256190	GTCACGCGGGTGCTGAGTAGT	DHS_118	-	-
-	chr6	31256480	GATTCCGCCGGCCTGGTTGCC	DHS_118	-	-
+	chr6	31256495	GGAATCACGTGCCATGCTCC	DHS_118	-	-
+	chr6	31256534	GCATCTTCCAGCTGAGCGTAC	DHS_118	-	-
+	chr6	31256535	GATCTTCCAGCTGAGCGTACC	DHS_118	-	-
+	chr6	31256538	GTTCCAGCTGAGCGTACCGGG	DHS_118	-	-
+	chr6	31256548	GCGTACCGGGAGGCTCCCAT	DHS_118	-	-
-	chr6	31256553	GCCGGGAGGCTCCCATTGGAC	DHS_118	-	-
+	chr6	31256564	GCCATTGGACTGGAGCTGCTA	DHS_118	-	-
+	chr6	31256567	GTTGGACTGGAGCTGCTACGG	DHS_118	-	-
+	chr6	31256570	GACTGGAGCTGCTACGGAGG	DHS_118	-	-
-	chr6	31256634	GCCGAGACAAGCGTCTCTCCT	DHS_118	-	-
+	chr6	31256640	GCAAGCGTCTCTCCTCAGCAG	DHS_118	-	-
+	chr6	31268404	GCCTTTACAAGGGATTCTAA	DHS_119	CTCF_51	enhancer_31
+	chr6	31268440	GTTGTGGCTTCAGTGAGCTCA	DHS_119	CTCF_51	enhancer_31
+	chr6	31268462	GTGCCCTCTGGTGTCCATGT	DHS_119	CTCF_51	enhancer_31
+	chr6	31268469	GCTGGTGTCCATGTGGGCCCA	DHS_119	CTCF_51	enhancer_31
+	chr6	31268505	GAAAAAACACTTGTAATTCTG	DHS_119	CTCF_51	enhancer_31
+	chr6	31268506	GAAAAACACTTGTAATTCTGG	DHS_119	CTCF_51	enhancer_31
+	chr6	31269081	GCTGCTAATAGTTGTCATACT	DHS_120	CTCF_52	-
+	chr6	31269114	GTTTGGATCAGAAGGTACGGT	DHS_120	CTCF_52	-
+	chr6	31269124	GAAGGTACGGTAGGAGCGCCT	DHS_120	CTCF_52	-
+	chr6	31269125	GAGGTACGGTAGGAGCGCCTA	DHS_120	CTCF_52	-
+	chr6	31269152	GATACCAGGCCCAAACAGCTG	DHS_120	CTCF_52	-
+	chr6	31269153	GTACCAGGCCCAAACAGCTGA	DHS_120	CTCF_52	-
+	chr6	31269174	GGCAGTAGAGTAAGTCCTGC	DHS_120	CTCF_52	-
+	chr6	31269191	GTGCAGGTCAATGCTTCGAGG	DHS_120	CTCF_52	-
+	chr6	31269192	GCAGGTCAATGCTTCGAGGA	DHS_120	CTCF_52	-
+	chr6	31269193	GCAGGTCAATGCTTCGAGGAG	DHS_120	CTCF_52	-
+	chr6	31269196	GTCAATGCTTCGAGGAGGGG	DHS_120	CTCF_52	-
+	chr6	31272806	GCTCCACTCTGCATTTGACCC	DHS_120_2	CTCF_52_2	-
+	chr6	31272851	GCACACGTGACCACGTCTGCC	DHS_120_2	CTCF_52_2	-
+	chr6	31272852	GACACGTGACCACGTCTGCCT	DHS_120_2	CTCF_52_2	-
+	chr6	31272853	GCACGTGACCACGTCTGCCTG	DHS_120_2	CTCF_52_2	-
+	chr6	31272876	GCAGTTGAAGTAAAGGACGCG	DHS_120_2	CTCF_52_2	-
+	chr6	31272879	GTTGAAGTAAAGGACGCGAGG	DHS_120_2	CTCF_52_2	-
+	chr6	31272915	GTTCTGTGAACCGCAGCGCTC	DHS_120_2	CTCF_52_2	-
+	chr6	31272916	GTCTGTGAACCGCAGCGCTCT	DHS_120_2	CTCF_52_2	-
+	chr6	31272929	GCGCTCTGGGTCCCTCCCGC	DHS_120_2	CTCF_52_2	-
+	chr6	31273527	GACCTGTCTCCGAATCCGTCG	DHS_121	Promoter_24	-
+	chr6	31273565	GAAGATTCCAGATCGCGCCCC	DHS_121	Promoter_24	-
+	chr6	31278398	GTTTTCAGAGGACCAGGGTTG	DHS_121	-	-
+	chr6	31278402	GCAGAGGACCAGGGTTGAGGT	DHS_121	-	-
+	chr6	31278427	GCATCTCATCCAGACCCTGC	DHS_121	-	-
+	chr6	31278448	GGCATCTGCCCCAGAACCCA	DHS_121	-	-
+	chr6	31278449	GCATCTGCCCCAGAACCCAA	DHS_121	-	-
+	chr6	31278532	GCTCACACATCACCCCTTATT	DHS_121	-	-
+	chr6	31279804	GTTTCCGGTGCCATGACTCAG	DHS_122	enhancer_32	-
+	chr6	31279821	GCAGAGGTTTGTCTGCTTCGT	DHS_122	enhancer_32	-
+	chr6	31279844	GTTTCAGTTTCCCTTCACTAC	DHS_122	enhancer_32	-
+	chr6	31328534	GTCTCTGATTTGCGATTCATA	CTCF_54	-	-
+	chr6	31328699	GCTGAGGTCAGTGGATCTATT	CTCF_54	-	-
+	chr6	31328702	GAGGTCAGTGGATCTATTAGG	CTCF_54	-	-
+	chr6	31347068	GGTCGCAGCCAGACATCCTC	DHS_124	-	-
+	chr6	31347071	GCGCAGCCAGACATCCTCTGG	DHS_124	-	-
+	chr6	31347072	GCAGCCAGACATCCTCTGGA	DHS_124	-	-
+	chr6	31347816	GATGACCCGCATCTCGGCCTC	DHS_125	Promoter_25	-
+	chr6	31347817	GTGACCCGCATCTCGGCCTCT	DHS_125	Promoter_25	-
+	chr6	31347818	GACCCGCATCTCGGCCTCTG	DHS_125	Promoter_25	-
-	chr6	31347820	GCCCGCATCTCGGCCTCTGGG	DHS_125	Promoter_25	-
+	chr6	31347833	GCTCTGGGGAGAATGTGAGTC	DHS_125	Promoter_25	-
+	chr6	31347845	GTGTGAGTCCGGGTGGGTGAC	DHS_125	Promoter_25	-
+	chr6	31347846	GTGAGTCCGGGTGGGTGACT	DHS_125	Promoter_25	-
+	chr6	31347907	GCTCTAGAACCCGACACCCAA	DHS_125	Promoter_25	-
+	chr6	31347908	GTCTAGAACCCGACACCCAAT	DHS_125	Promoter_25	-
+	chr6	31347942	GGGACGCGTCATGAGTATTC	DHS_125	Promoter_25	-
-	chr6	31384164	GGAAAGTTCTCGAAGACCGC	DHS_126	-	-
-	chr6	31383678	GCGGCTCAAAGAGCGGCTTGG	DHS_126	-	-
-	chr6	31383742	GCTTTAAGTCCGCCTACGACA	DHS_126	-	-
+	chr6	31383751	GCGGACTTAAAGTGTCCTTCG	DHS_126	-	-
+	chr6	31383900	GCTCCTTCCTCCCTCTGTCAT	DHS_126	-	-
-	chr6	31383906	GCCTCCCTCTGTCATTGGTCA	DHS_126	-	-
+	chr6	31383935	GTCAGTCATGATCCAGATTGA	DHS_126	-	-
+	chr6	31383945	GTCCAGATTGAAGGAGAAACC	DHS_126	-	-
-	chr6	31383979	GCCCAGCGCTTCCCCACCTGA	DHS_126	-	-
+	chr6	31383980	GCCAGCGCTTCCCCACCTGAG	DHS_126	-	-
+	chr6	31384013	GGCCCCGCCCCCCCATCCCT	DHS_126	-	-
+	chr6	31384021	GCCCCCCATCCCTGGGAGAAC	DHS_126	-	-
+	chr6	31384022	GCCCCCATCCCTGGGAGAACC	DHS_126	-	-
+	chr6	31384035	GAGAACCGGGCTGGTCACTC	DHS_126	-	-
+	chr6	31384043	GGCTGGTCACTCTGGGGTCG	DHS_126	-	-
+	chr6	31384046	GTGGTCACTCTGGGGTCGGGG	DHS_126	-	-
+	chr6	31384047	GGTCACTCTGGGGTCGGGGC	DHS_126	-	-
+	chr6	31384048	GTCACTCTGGGGTCGGGGCG	DHS_126	-	-
+	chr6	31412978	GCAAATAAGGTAAAGGTGCAA	DHS_127	-	-
+	chr6	31412979	GAAATAAGGTAAAGGTGCAAT	DHS_127	-	-
+	chr6	31420836	GCATAGCAGTTACACTGCTT	CTCF_56	-	-
+	chr6	31420918	GTCTCTGATTTGTGATAGATA	CTCF_56	-	-
-	chr6	31421090	GCCTTTATAAGGTCTCCCTGT	CTCF_56	-	-
+	chr6	31421093	GTTATAAGGTCTCCCTGTCAG	CTCF_56	-	-
+	chr6	31421103	GTCCCTGTCAGTGGATCTATT	CTCF_56	-	-
-	chr6	31421105	GCCTGTCAGTGGATCTATTAG	CTCF_56	-	-
+	chr6	31421106	GCTGTCAGTGGATCTATTAGG	CTCF_56	-	-
+	chr6	31432905	GACCAGCATCTCGGCGTCTG	DHS_128	Promoter_26	-
-	chr6	31432907	GCCAGCATCTCGGCGTCTGAG	DHS_128	Promoter_26	-
+	chr6	31432920	GTCTGAGGAGACTCTGAGTC	DHS_128	Promoter_26	-
+	chr6	31432921	GTCTGAGGAGACTCTGAGTCC	DHS_128	Promoter_26	-
+	chr6	31432924	GAGGAGACTCTGAGTCCGGG	DHS_128	Promoter_26	-
+	chr6	31432925	GAGGAGACTCTGAGTCCGGGT	DHS_128	Promoter_26	-
+	chr6	31432995	GTCTAGATATCCAATACCCAA	DHS_128	Promoter_26	-
+	chr6	31432996	GCTAGATATCCAATACCCAAT	DHS_128	Promoter_26	-
+	chr6	31433001	GTATCCAATACCCAATGGGAG	DHS_128	Promoter_26	-
+	chr6	31433002	GATCCAATACCCAATGGGAGT	DHS_128	Promoter_26	-
+	chr6	31433030	GGGACGCGTCACGAGTATCC	DHS_128	Promoter_26	-
-	chr6	31433062	GCCGACACAAGTTGGGAGAAG	DHS_128	Promoter_26	-
+	chr6	31442700	GCGCGGCCAAGATTGGCCGGA	DHS_129	CTCF_57	enhancer_33
+	chr6	31442711	GTTGGCCGGAAGGTTTTTACT	DHS_129	CTCF_57	enhancer_33
+	chr6	31442891	GCGCACCACGCATTTCTTCAC	DHS_129	CTCF_57	enhancer_33
+	chr6	31442944	GCAAAAGAAGCGTGAGGTTGG	DHS_129	CTCF_57	enhancer_33
+	chr6	31442945	GAAAAGAAGCGTGAGGTTGGT	DHS_129	CTCF_57	enhancer_33
+	chr6	31442946	GAAAGAAGCGTGAGGTTGGTG	DHS_129	CTCF_57	enhancer_33
+	chr6	31442947	GAAGAAGCGTGAGGTTGGTGG	DHS_129	CTCF_57	enhancer_33
+	chr6	31442950	GAAGCGTGAGGTTGGTGGGGG	DHS_129	CTCF_57	enhancer_33
+	chr6	31443050	GAGAGGAGGCTCTGGCCGTGA	DHS_129	CTCF_57	enhancer_33
+	chr6	31443059	GTCTGGCCGTGAAGGCGCCTG	DHS_129	CTCF_57	enhancer_33
+	chr6	31443064	GCCGTGAAGGCGCCTGTGGAG	DHS_129	CTCF_57	enhancer_33
+	chr6	31449979	GACTCTAAGTCTGCTAAGTAG	CTCF_58	-	-
+	chr6	31449980	GCTCTAAGTCTGCTAAGTAGT	CTCF_58	-	-
-	chr6	31472883	GCCAGATGGGCTAGATTCTCA	DHS_130	CTCF_59	-
+	chr6	31472884	GCAGATGGGCTAGATTCTCAC	DHS_130	CTCF_59	-
+	chr6	31475510	GTCTGAGCGCCGCAGCTCCCT	DHS_131	CTCF_60	-
-	chr6	31475533	GCCCCTTGTATCATTTCAGTG	DHS_131	CTCF_60	-
+	chr6	31475534	GCCCTTGTATCATTTCAGTGA	DHS_131	CTCF_60	-
+	chr6	31475553	GAAGGTCACTCCAGTCTTTCA	DHS_131	CTCF_60	-
+	chr6	31475567	GCTTTCATGGAGGCCAAACTA	DHS_131	CTCF_60	-
+	chr6	31475568	GTTTCATGGAGGCCAAACTAA	DHS_131	CTCF_60	-
-	chr6	31475846	GCCGGATTCCAGATCACGCTC	DHS_132	-	-
+	chr6	31475893	GCGGGTCTGCATTTTCATAAC	DHS_132	-	-
+	chr6	31476378	GAACTCCGTCGCAAAAACTTT	DHS_133	-	-
+	chr6	31476379	GACTCCGTCGCAAAAACTTTC	DHS_133	-	-
+	chr6	31476380	GCTCCGTCGCAAAAACTTTCG	DHS_133	-	-
+	chr6	31476381	GTCCGTCGCAAAAACTTTCGG	DHS_133	-	-
+	chr6	31476384	GTCGCAAAAACTTTCGGGGG	DHS_133	-	-
+	chr6	31476389	GAAAAACTTTCGGGGGCGGAG	DHS_133	-	-
+	chr6	31478315	GGAAGGCTGTGCAGTAATCT	enhancer_34	-	-
+	chr6	31478781	GAAGAGAGTTTGTGGTCTGAG	DHS_134	-	-
+	chr6	31478792	GTGGTCTGAGCGGTTCTACTG	DHS_134	-	-
+	chr6	31478796	GCTGAGCGGTTCTACTGCGGC	DHS_134	-	-
+	chr6	31478969	GAGCCGGTTTAATGGGGCGGC	DHS_135	DHS_135	-
-	chr6	31478974	GCGCCGGCCGCCCCATTAAAC	DHS_135	DHS_135	-
+	chr6	31479214	GGAATTTTCTCTTCCAAGCG	DHS_135	DHS_135	-
+	chr6	31479268	GTTCCGGGCCCCAGTTTCAT	DHS_135	Promoter_27	-
+	chr6	31479276	GCCCCAGTTTCATTGGATGAG	DHS_135	Promoter_27	-
+	chr6	31479280	GAGTTTCATTGGATGAGCGGT	DHS_135	Promoter_27	-
+	chr6	31479281	GTTTCATTGGATGAGCGGTC	DHS_135	Promoter_27	-
+	chr6	31479282	GTTTCATTGGATGAGCGGTCG	DHS_135	Promoter_27	-
+	chr6	31479283	GTTCATTGGATGAGCGGTCGG	DHS_135	Promoter_27	-
+	chr6	31479288	GTGGATGAGCGGTCGGGGGAC	DHS_135	Promoter_27	-
+	chr6	31479289	GGATGAGCGGTCGGGGGACC	DHS_135	Promoter_27	-
+	chr6	31479311	GCCAGGTGACTAAGTTTCCG	DHS_135	Promoter_27	-
+	chr6	31479325	GTTTCCGCGGCGCCTTCTCCC	DHS_135	Promoter_27	-
+	chr6	31479492	GGAGCAGTGGGACGTTTCCG	DHS_135	Promoter_27	-
+	chr6	31479502	GACGTTTCCGGGGGTCGGGT	DHS_135	Promoter_27	-
+	chr6	31517527	GTCAGAATCCGAGAGCACTG	DHS_136	CTCF_61	enhancer_35
+	chr6	31517530	GAGAATCCGAGAGCACTGTGG	DHS_136	CTCF_61	enhancer_35
+	chr6	31517543	GACTGTGGCGGCGCCCCCGTG	DHS_136	CTCF_61	enhancer_35
-	chr6	31517557	GCCCGTGTGGCCACAGGACTG	DHS_136	CTCF_61	enhancer_35
+	chr6	31517631	GCCCTGTTCCCCGCACCTGGA	DHS_136	CTCF_61	enhancer_35
+	chr6	31517658	GCTGCACAGAAGAGAGTCTCC	DHS_136	CTCF_61	enhancer_35
+	chr6	31517670	GAGTCTCCCGGTCTCGTGTC	DHS_136	CTCF_61	enhancer_35
-	chr6	31517677	GCCGGTCTCGTGTCAGGCTCT	DHS_136	CTCF_61	enhancer_35
+	chr6	31518340	GTCCTAGCAGAGTCCAGCCC	DHS_137	CTCF_62	-
+	chr6	31518341	GTCCTAGCAGAGTCCAGCCCC	DHS_137	CTCF_62	-
+	chr6	31518350	GAGTCCAGCCCCGGGAAGCCT	DHS_137	CTCF_62	-
+	chr6	31518351	GTCCAGCCCCGGGAAGCCTG	DHS_137	CTCF_62	-
+	chr6	31518364	GAAGCCTGGGGTCACAGCACT	DHS_137	CTCF_62	-
+	chr6	31518372	GGTCACAGCACTCGGCTTGC	DHS_137	CTCF_62	-
+	chr6	31518376	GACAGCACTCGGCTTGCTGGA	DHS_137	CTCF_62	-
+	chr6	31518486	GGCAGCCAAGGAGATGCTCT	DHS_137	CTCF_62	-
-	chr6	31538789	GCCACCTTTCCCAACCTGTGT	DHS_138	Promoter_28	-
+	chr6	31538790	GCACCTTTCCCAACCTGTGTC	DHS_138	Promoter_28	-
+	chr6	31538818	GTTACCTGGATACTCATGATG	DHS_138	Promoter_28	-
+	chr6	31538840	GCCTCAGTTCTCACTTCCAT	DHS_138	Promoter_28	-
-	chr6	31538841	GCCTCAGTTCTCACTTCCATT	DHS_138	Promoter_28	-
+	chr6	31538879	GTCAGCCAATCAGTGTCGCCG	DHS_138	Promoter_28	-
+	chr6	31538886	GATCAGTGTCGCCGCGGTTCC	DHS_138	Promoter_28	-
-	chr6	31538904	GCCTGGTTCTAAAGTCCTCGC	DHS_138	Promoter_28	-
+	chr6	31538912	GTAAAGTCCTCGCCGGCCCAC	DHS_138	Promoter_28	-
+	chr6	31538913	GAAAGTCCTCGCCGGCCCACC	DHS_138	Promoter_28	-
+	chr6	31550795	GCCATCCACCAGTGCCTTGGC	DHS_139	CTCF_63	-
+	chr6	31550825	GTCACTCAACCCTCCCCCTGG	DHS_139	CTCF_63	-
-	chr6	31550838	GCCCCTGGTGGTAGTCCCTGG	DHS_139	CTCF_63	-
+	chr6	31550887	GCCGCACAAATCCCCAAGAA	DHS_139	CTCF_63	-
+	chr6	31550894	GAAATCCCCAAGAATGGCACG	DHS_139	CTCF_63	-
+	chr6	31550902	GAAGAATGGCACGTGGGTACA	DHS_139	CTCF_63	-
+	chr6	31550903	GAGAATGGCACGTGGGTACAA	DHS_139	CTCF_63	-
-	chr6	31567881	GAGAAGAATCTAGCCCATCT	CTCF_64	-	-
-	chr6	31568017	GCTTGGATGGAGACAAAGTCG	CTCF_64	-	-
+	chr6	31568018	GCTCGACTTTGTCTCCATCCA	CTCF_64	-	-
+	chr6	31568027	GTCTCCATCCAAGGACGCTA	CTCF_64	-	-
+	chr6	31568237	GATCCTCTTGAAAGAGTTTC	CTCF_64	-	-
+	chr6	31568240	GCCTCTTGAAAGAGTTTCTGG	CTCF_64	-	-
-	chr6	31568240	GCCACCAGAAACTCTTTCAAG	CTCF_64	-	-
+	chr6	31568243	GCTTGAAAGAGTTTCTGGTGG	CTCF_64	-	-
+	chr6	31568293	GACTCTGTAACCATTTTGGTG	CTCF_64	-	-
+	chr6	31568294	GCTCTGTAACCATTTTGGTGT	CTCF_64	-	-
-	chr6	31568302	GAGCTAAGCCCCACACCAAAA	CTCF_64	-	-
-	chr6	31568362	GATTGTGAACTTGGATTTATG	CTCF_64	-	-
-	chr6	31569567	GGGGACGTGTTAAGAAAGGA	DHS_140	CTCF_65	-
-	chr6	31569568	GGGGGACGTGTTAAGAAAGG	DHS_140	CTCF_65	-
-	chr6	31569571	GATAGGGGGACGTGTTAAGAA	DHS_140	CTCF_65	-
-	chr6	31569599	GTGCAGAGAGTGGTGAAAGG	DHS_140	CTCF_65	-
+	chr6	31569719	GTTCTATGCGCCCCAGCGCCC	DHS_140	CTCF_65	-
+	chr6	31569720	GTCTATGCGCCCCAGCGCCCT	DHS_140	CTCF_65	-
+	chr6	31569729	GCCCAGCGCCCTGGGCCGCGC	DHS_140	CTCF_65	-
-	chr6	31569729	GCCAGCGCGGCCCAGGGCGCT	DHS_140	CTCF_65	-
-	chr6	31569730	GACCAGCGCGGCCCAGGGCGC	DHS_140	CTCF_65	-
-	chr6	31569736	GTACAAGACCAGCGCGGCCCA	DHS_140	CTCF_65	-
-	chr6	31569737	GATACAAGACCAGCGCGGCCC	DHS_140	CTCF_65	-
+	chr6	31569767	GTGGTCCCTCCCGTCTTTGA	DHS_140	CTCF_65	-
+	chr6	31569768	GTGGTCCCTCCCGTCTTTGAC	DHS_140	CTCF_65	-
+	chr6	31569769	GGTCCCTCCCGTCTTTGACG	DHS_140	CTCF_65	-
-	chr6	31569772	GTGGCCCCGTCAAAGACGGGA	DHS_140	CTCF_65	-
-	chr6	31569773	GTTGGCCCCGTCAAAGACGGG	DHS_140	CTCF_65	-
-	chr6	31569776	GAGTTTGGCCCCGTCAAAGAC	DHS_140	CTCF_65	-
-	chr6	31569777	GAGTTTGGCCCCGTCAAAGA	DHS_140	CTCF_65	-
+	chr6	31569930	GTTCCAGGGGTGAAGTGTTTT	DHS_141	-	-
+	chr6	31569937	GGTGAAGTGTTTTCGGACCC	DHS_141	-	-
+	chr6	31569946	GTTTTCGGACCCCGGAATCTG	DHS_141	-	-
+	chr6	31569947	GTTTCGGACCCCGGAATCTGT	DHS_141	-	-
+	chr6	31569950	GCGGACCCCGGAATCTGTGGG	DHS_141	-	-
-	chr6	31569954	GCAGGCCGCCCACAGATTCCG	DHS_141	-	-
-	chr6	31569955	GCAGGCCGCCCACAGATTCC	DHS_141	-	-
-	chr6	31569956	GCGCAGGCCGCCCACAGATTC	DHS_141	-	-
+	chr6	31569957	GCGGAATCTGTGGGCGGCCTG	DHS_141	-	-
+	chr6	31569958	GGAATCTGTGGGCGGCCTGC	DHS_141	-	-
+	chr6	31569961	GATCTGTGGGCGGCCTGCGGG	DHS_141	-	-
+	chr6	31569962	GTCTGTGGGCGGCCTGCGGGA	DHS_141	-	-
+	chr6	31569991	GCGCAGTTCCCTACTCACCC	DHS_141	-	-
+	chr6	31570141	GACCAGAAGCCTGAGGCAGCT	DHS_141	-	-
-	chr6	31570272	GCGTTTTGAATTTTGTGGCC	DHS_141	-	-
-	chr6	31570277	GCGCAAGCGTTTTGAATTTTG	DHS_141	-	-
+	chr6	31570279	GACAAAATTCAAAACGCTTGC	DHS_141	-	-
+	chr6	31570294	GCTTGCGGGCAAAGCCGTGCG	DHS_141	-	-
+	chr6	31570847	GCTTGGTGGGGGAGGGGACCC	DHS_142	-	-
+	chr6	31570853	GGGGGAGGGGACCCAGGCCT	DHS_142	-	-
-	chr6	31570864	GCTTCTCAGCGCCGAGGCCT	DHS_142	-	-
-	chr6	31570865	GTGCTTCTCAGCGCCGAGGCC	DHS_142	-	-
-	chr6	31570870	GGAGTTGCTTCTCAGCGCCG	DHS_142	-	-
+	chr6	31570875	GCGCTGAGAAGCAACTCCCC	DHS_142	-	-
+	chr6	31573428	GCATTGCAGTAACGCTGTGCG	DHS_143	Promoter_29	-
+	chr6	31573473	GAAACCACGCGTTGTCTGTCC	DHS_143	Promoter_29	-
+	chr6	31573505	GCCAGTGAGAGCCGGCCTGA	DHS_143	Promoter_29	-
+	chr6	31573506	GCCAGTGAGAGCCGGCCTGAT	DHS_143	Promoter_29	-
-	chr6	31573506	GCCCATCAGGCCGGCTCTCAC	DHS_143	Promoter_29	-
+	chr6	31573509	GTGAGAGCCGGCCTGATGGG	DHS_143	Promoter_29	-
+	chr6	31573514	GAGCCGGCCTGATGGGAGGAC	DHS_143	Promoter_29	-
-	chr6	31573516	GCGCCGGTCCTCCCATCAGGC	DHS_143	Promoter_29	-
-	chr6	31573520	GCTTTCGCCGGTCCTCCCATC	DHS_143	Promoter_29	-
+	chr6	31573521	GCTGATGGGAGGACCGGCGAA	DHS_143	Promoter_29	-
+	chr6	31573522	GTGATGGGAGGACCGGCGAAA	DHS_143	Promoter_29	-
+	chr6	31573523	GATGGGAGGACCGGCGAAAG	DHS_143	Promoter_29	-
+	chr6	31573550	GTGAAGCCCGCGCTCCTTGG	DHS_143	Promoter_29	-
+	chr6	31573553	GAAGCCCGCGCTCCTTGGGGG	DHS_143	Promoter_29	-
+	chr6	31573554	GAGCCCGCGCTCCTTGGGGGT	DHS_143	Promoter_29	-
-	chr6	31573556	GTTCCCACCCCCAAGGAGCGC	DHS_143	Promoter_29	-
-	chr6	31573557	GATTCCCACCCCCAAGGAGCG	DHS_143	Promoter_29	-
+	chr6	31573561	GCTCCTTGGGGGTGGGAATG	DHS_143	Promoter_29	-
+	chr6	31573562	GCTCCTTGGGGGTGGGAATGC	DHS_143	Promoter_29	-
+	chr6	31573563	GTCCTTGGGGGTGGGAATGCG	DHS_143	Promoter_29	-
-	chr6	31573740	GTCTAGCGGCCTGGAGACCTG	DHS_144	Promoter_30	-
-	chr6	31573742	GATTCTAGCGGCCTGGAGACC	DHS_144	Promoter_30	-
-	chr6	31573750	GAAGAGAAAATTCTAGCGGCC	DHS_144	Promoter_30	-
-	chr6	31573817	GATCCAGTGAAAACTGAGGCC	DHS_144	Promoter_30	-
-	chr6	31573822	GCGCTTATCCAGTGAAAACTG	DHS_144	Promoter_30	-
+	chr6	31573823	GCTCAGTTTTCACTGGATAAG	DHS_144	Promoter_30	-
+	chr6	31573834	GCTGGATAAGCGGTCGCTGAG	DHS_144	Promoter_30	-
+	chr6	31573835	GTGGATAAGCGGTCGCTGAGC	DHS_144	Promoter_30	-
+	chr6	31573836	GGATAAGCGGTCGCTGAGCG	DHS_144	Promoter_30	-
+	chr6	31573842	GCGGTCGCTGAGCGGGGCGC	DHS_144	Promoter_30	-
+	chr6	31573859	GCGCAGGTGACTAAATTTCGA	DHS_144	Promoter_30	-
+	chr6	31573860	GCAGGTGACTAAATTTCGAC	DHS_144	Promoter_30	-
+	chr6	31573861	GCAGGTGACTAAATTTCGACG	DHS_144	Promoter_30	-
-	chr6	31574560	GCAGGAGAGACCAGAAAATGC	DHS_145	-	-
-	chr6	31574561	GCAGGAGAGACCAGAAAATG	DHS_145	-	-
+	chr6	31574680	GATTGGAAGGCCGTTCCAGCG	DHS_145	-	-

## Sheet: control-gDNA sequences
strand	chr	start	seq
+	chr6	30527181	GGATAGCCCAATCGGATGCT
+	chr6	30527182	GATAGCCCAATCGGATGCTG
+	chr6	30527184	GTAGCCCAATCGGATGCTGGG
-	chr6	30527191	GCGGACCCCCCAGCATCCGAT
+	chr6	30527193	GCGGATGCTGGGGGGTCCGTT
-	chr6	30527517	GATATGTCGCAGGACCGGTGG
+	chr6	30527955	GCCACGGAGGTACTTCGCCTG
+	chr6	30527959	GGAGGTACTTCGCCTGAGGC
-	chr6	30528817	GCGACGATCACCGACCAGGAG
-	chr6	30528817	GCTCCTGGTCGGTGATCGTCG
-	chr6	30528822	GTCCGCGACGATCACCGACC
+	chr6	30539901	GATGGCCCAATCGGGCGCTG
+	chr6	30539904	GGCCCAATCGGGCGCTGTGG
-	chr6	30540233	GCCGGTAGCCGGTGACGGGGC
+	chr6	30540235	GCCCGTCACCGGCTACCGGCT
+	chr6	30540240	GCACCGGCTACCGGCTAGGTC
-	chr6	30540283	GTGGACGCCGAGCGCCCGCT
-	chr6	30541797	GGGATACCCTTAGAACAGAC
-	chr6	30542373	GTCGCTGTCGGCGCCGCGGCG
-	chr6	30542373	GCGCCGCGGCGCCGACAGCGA
+	chr6	30542614	GACGAGGACGATCTGTCGCCC
-	chr6	30543280	GAGTCATCCTACTGACAACGA
+	chr6	30544651	GTTCTTCCGCCCGCTGTTGG
-	chr6	30544683	GAGCCCGCAGTGTGGTCCGAA
+	chr6	30563643	GCACTAGTGAGGCGGCTAGTG
+	chr6	30563644	GACTAGTGAGGCGGCTAGTGA
+	chr6	30565808	GCGCGGGTCCCCTCGAATCTT
+	chr6	30568185	GCTGAGTGTAAGTGCGGGGC
-	chr6	30571234	GACATAGCCTGCCGATATGGC
-	chr6	30571238	GCAAACATAGCCTGCCGATA
+	chr6	30572763	GCCAGACTAGGATCTTAACGG
-	chr6	30572765	GCCCCGTTAAGATCCTAGTCT
-	chr6	30576763	GCCACCACTAACTCGGCGGCT
-	chr6	30585737	GATAAGAAACCACGTTTACGC
+	chr6	30592112	GGGCGACCCCTGAAGCGTAG
+	chr6	30592119	GCCCTGAAGCGTAGAGGAACC
+	chr6	30595216	GAGTGGGGATCACGTGCGTAG
-	chr6	30604074	GCGATTAGTCCCCACTTCTC
+	chr6	30605014	GCATAACCCCTGTTGAGGTCC
+	chr6	30609398	GACGTGATTGGCGGCATTTT
+	chr6	30619739	GGGTGCGTATTTCAGCGTGG
+	chr6	30619740	GGTGCGTATTTCAGCGTGGA
-	chr6	30621510	GATCCCGTTATCTACATGGGG
+	chr6	30621853	GCATAAGGGTTTCGGCCAGCC
+	chr6	30622406	GCCTACGCTATAGCAGGGGGC
+	chr6	30622407	GCTACGCTATAGCAGGGGGCT
+	chr6	30622539	GCACATCATTCCGAGCCGCCT
-	chr6	30623244	GCTCGCTGATCAATGGGCTGG
-	chr6	30628219	GACCATCGGCTGTGTGGGTA
+	chr6	30629295	GTGGCGGGAAATTCACAACCT
-	chr6	30630190	GTAGTGCTGATGTCCGCAGTT
+	chr6	30630637	GTAGCTCCAAGGAGGACGTCG
+	chr6	30631659	GGACGGCGCCCCGTGCTAGC
-	chr6	30631752	GCCCTCGCGGCCTATCGCGGA
-	chr6	30631753	GACCCTCGCGGCCTATCGCGG
-	chr6	30631756	GTCAACCCTCGCGGCCTATCG
+	chr6	30631758	GATAGGCCGCGAGGGTTGACG
-	chr6	30632549	GTCCCAACAGGTCGGCACCC
+	chr6	30633236	GCTGTCAAGCCCGTCCGGGCA
+	chr6	30633237	GTGTCAAGCCCGTCCGGGCAA
+	chr6	30633244	GCCCGTCCGGGCAAGGGGCTA
+	chr6	30633454	GCGCAGCCGCAGAACAGTAG
+	chr6	30633631	GTGTTTTGGATAGCGACGGTA
+	chr6	30645364	GTGTCCGAACACTCCTGTCAC
+	chr6	30645365	GTCCGAACACTCCTGTCACA
-	chr6	30647210	GACAGCTACTGTGGCGGCGCC
+	chr6	30648576	GATCATCGTGAATTAGCAAG
+	chr6	30653841	GAGCGAGATACCCGAAAAGGC
-	chr6	30654307	GATCCGATTCTTCTCCGGCT
+	chr6	30655008	GTTCGCTATCTAGTCTGAAGC
-	chr6	30655564	GCATGCTCCTCCATTTACGAC
+	chr6	30658312	GCAACTAGGGGACATGCGATT
+	chr6	30658327	GCGATTGGGGACACGAAGGAA
-	chr6	30658892	GGCGGGAGGACATCTCCGCC
-	chr6	30659419	GGCGGCCGGCTACAATGTAC
+	chr6	30659423	GATTGTAGCCGGCCGCCGCTA
-	chr6	30659437	GTCCTACCAGCCCGTAGCGG
+	chr6	30659441	GTACGGGCTGGTAGGACCCAA
-	chr6	30661408	GCCTATAGTAGTGGAGCCGCT
-	chr6	30661409	GCCCTATAGTAGTGGAGCCGC
-	chr6	30661831	GCGCGGCAGTCCTTGAAATGT
+	chr6	30661832	GCATTTCAAGGACTGCCGCGC
-	chr6	30661981	GTGTACTCCTTAGGGCGCTTC
+	chr6	30662227	GAGGTGTGACATTCGGCTACC
-	chr6	30664594	GTCACGAATGGTACATCGTAA
+	chr6	30664605	GCATTCGTGAGTCTCGCTGTA
+	chr6	30665127	GTTGGTGTATGGACGAGGTC
+	chr6	30665663	GCGCAAGTGCCTGGGCCGCTT
-	chr6	30670603	GATATAAGGCCCCGTGTGTAT
+	chr6	30671400	GAAGATAGACCCCGTTGCACC
+	chr6	30671402	GATAGACCCCGTTGCACCTG
-	chr6	30676620	GCATCCGGTGCAAGTTTTAGC
+	chr6	30676926	GATGTGGGGACCCGCAATAGA
-	chr6	30678284	GCGGCCTCTATGGTATGGTCC
-	chr6	30678284	GGACCATACCATAGAGGCCG
+	chr6	30678326	GCGCATTGGGCCACCCCGCAT
+	chr6	30678335	GCCACCCCGCATAGGGTCGCC
-	chr6	30678338	GCCGGGCGACCCTATGCGGGG
-	chr6	30679385	GACTCCGTATGTTGAGACTC
+	chr6	30679554	GTTAGGGGGTATGGGCTCGTA
-	chr6	30679815	GTAGTCAGGAGCGATATATCC
-	chr6	30680194	GCCTAACCAACTGACCCGGAA
-	chr6	30680745	GACCTACGGCTGCCAAGGTAT
-	chr6	30680949	GATCGTGTCCTAAGTTGAGGC
+	chr6	30681662	GCCCACTTTAGACTCACGCTG
-	chr6	30684655	GTGCAGATTTATTGACGTTGG
-	chr6	30685372	GTTGGACGTCCACGGTCCCAA
+	chr6	30692243	GTTTTGCGACGTCAGCACCTC
-	chr6	30694064	GCTGGTTGTGGCGCTCGCTT
-	chr6	30696181	GAAACGGACTGTAGGGCCTCC
-	chr6	30700819	GACAGGGGACAATGTAACGTC
-	chr6	30709359	GACAGCGGTGATCCGATGCAA
+	chr6	30711774	GATGTCATTGAATGGGCGGCG
+	chr6	30716337	GCAGTCGATCCCACGCCCGC
-	chr6	30716349	GCAGGCTTTACCAGCGGGCGT
-	chr6	30718556	GCGGCGAGGGGCCCTGTTTA
-	chr6	30718557	GCGCGGCGAGGGGCCCTGTTT
+	chr6	30718745	GCAGCTCAACGTCGTCGCACC
-	chr6	30718746	GTGGTGCGACGACGTTGAGCT
-	chr6	30718747	GCTGGTGCGACGACGTTGAGC
+	chr6	30718752	GACGTCGTCGCACCAGGTAAT
+	chr6	30719019	GAACACCGAGATCCATCGAGT
+	chr6	30719021	GCACCGAGATCCATCGAGTTG
+	chr6	30719022	GACCGAGATCCATCGAGTTGG
+	chr6	30719075	GCGCTTAATACTTGCTGGGGA
-	chr6	30720094	GATATCGGGACCTAGCTACCA
+	chr6	30722373	GAACGTCGCAGCACCAGGCCT
+	chr6	30722693	GAATACAGCGCTTGGGGGGGC
+	chr6	30722694	GATACAGCGCTTGGGGGGGCG
+	chr6	30722695	GTACAGCGCTTGGGGGGGCGG
+	chr6	30725238	GTGATCCCCTGGATGCTCAAC
+	chr6	30725238	GTTGAGCATCCAGGGGATCA
+	chr6	30725760	GGGTAATCCTTGGACGTACA
+	chr6	30730589	GTCCGAGTCAACCGTGCCGTG
-	chr6	30730932	GGACTATATCCGTGTACGCA
-	chr6	30731020	GTCAGATCGATGCGCCGAGCC
+	chr6	30732061	GAGGTTTCCCGCTACTACTAC
-	chr6	30732421	GGCCTATCAGCACGAGCTTG
-	chr6	30735221	GCTGGGGCACGAAAGGTCAGT
+	chr6	30735257	GATACGGGCCTGCATGTCAG
-	chr6	30738433	GTCCTCCGCTACATGACAGA
+	chr6	30740769	GTGAGCTAAATAGCTCGCTAC
-	chr6	30741315	GGCGAGTGCGGGATCTCGCC
-	chr6	30741326	GCAAATATAAGCGGCGAGTGC
+	chr6	30752203	GTTGATAAAGGCGGCACAATG
-	chr6	30758698	GCCGGAAATGCTACCCGGGTG
-	chr6	30758868	GATACGGGTTAAGCCTTGGG
-	chr6	30760246	GAAGCGGTACCCAACTGCCG
-	chr6	30761321	GTCCGAGGGAGACCAGAGAG
-	chr6	30761492	GACCGATTCATCCGGCAGGAG
+	chr6	30761502	GATGAATCGGTTCTGGTGCAC
-	chr6	30761622	GAGCGCCGCCGGGCCAAGCT
-	chr6	30761729	GTACAGCTGCTAGCCCGGCGC
+	chr6	30762506	GATAGCCACCCCCGAGACTTT
+	chr6	30762514	GCCCCGAGACTTTCGGAACCC
-	chr6	30762519	GCGCCCGGGTTCCGAAAGTCT
+	chr6	30762522	GCTTTCGGAACCCGGGCGTCA
-	chr6	30763138	GACCCCGCGTGGGACTCGCTG
-	chr6	30763138	GCAGCGAGTCCCACGCGGGGT
+	chr6	30763423	GCCTTTGTTTTGCGGGGTCGA
-	chr6	30765439	GTACTACTTTGCGTAGCTATC
+	chr6	30766355	GACTCCGGTCACCGCCCTTTT
+	chr6	30766646	GAAAGCGCACGAACTCCACTC
+	chr6	30766763	GTCGGGATTCCCGCTGCCAC
-	chr6	30772312	GACTTCACGGGCAACCAGTCT
-	chr6	30772313	GACTTCACGGGCAACCAGTC
-	chr6	30778310	GCAGCATGCCTCGGTCCTATA
-	chr6	30778509	GTCGGGAGCGAAGGCTGCTAG
-	chr6	30778622	GCGTCCTTAGTCCCGCAAGGC
-	chr6	30778928	GTGGTCACTGATCGCATCCGC
-	chr6	30779209	GTACCAAGCCGCAGCCTCCGA
-	chr6	30779537	GAGGTAGATCTAGGTTCACCC
-	chr6	30780515	GCCTACGTCTCAGGCTACTA
+	chr6	30781272	GTTCAGAGGTGACAGGTCGGT
-	chr6	30781695	GAGCCAACCGTTCGTAAGACC
+	chr6	30782858	GTCCACACGTGGATGATGGTA
+	chr6	30782972	GACAACGGGTGCCGAGGATAA
-	chr6	30783262	GCCTCGTGATAATCAACCCCT
+	chr6	30784013	GCCTCAAGGTGCGTGTCAAA
+	chr6	30784316	GTCATAGCCTTAGGCGGGCA
-	chr6	30790818	GGGCGGCTACATATCTTTAG
-	chr6	30791812	GACCATAGGCTTTTGCGGGCG
+	chr6	30792840	GTAAACTCGGAGCGGGGCGCC
-	chr6	30792915	GGGCGTACCTTGGGTGCGAC
-	chr6	30792925	GAAGGCGGGAGGGGCGTACCT
+	chr6	30792927	GTACGCCCCTCCCGCCTTCT
-	chr6	30793002	GCGCGCGCGGGGACTTAAAGT
-	chr6	30793016	GACCGTTACTGGTGGCGCGCG
-	chr6	30793025	GTGGGTCGCGACCGTTACTGG
+	chr6	30793373	GTCATAGACGTCCGACGTGTC
+	chr6	30793466	GTTGCGCGTTGCAGTCGTGGC
+	chr6	30793469	GCGCGTTGCAGTCGTGGCTGG
-	chr6	30793597	GTCCGTCAGAGACGTATTCCC
+	chr6	30793704	GTCCCCACCTTTCGAGGGGCG
+	chr6	30793705	GCCCCACCTTTCGAGGGGCGA
+	chr6	30794707	GATACATTGATCTGCCCAGCG
-	chr6	30795380	GTTTAGAGAAACCGACATCG
+	chr6	30796531	GTAAAAGGGCTCTTCGGGTT
+	chr6	30796532	GTAAAAGGGCTCTTCGGGTTT
+	chr6	30796595	GCTTCTAACGGTCCGAGAAC
+	chr6	30796596	GCTTCTAACGGTCCGAGAACC
-	chr6	30801970	GCATAGGTTGACTAAGCCCAC
+	chr6	30802653	GTAGGCGGGATTGCTACCTTA
-	chr6	30807360	GCTCTAGAAGGGGGCACACGT
-	chr6	30808610	GCACCGGTGTAGAGGGCAACG
-	chr6	30810804	GATCAGATGTTTCTCCGTACA
+	chr6	30814488	GTCATAGCCCGCTTGCACTAA
-	chr6	30814680	GACACGCACAGTACCCAGGTG
+	chr6	30814713	GTGAAAGTGCTGCGACTTTAT
-	chr6	30815939	GGTCAACACCCGCCGAGCAC
-	chr6	30815960	GAAGGCCGCCTATGACATCG
+	chr6	30827954	GTTCAGACACCCCGTATTTAC
-	chr6	30828225	GCACGCGATCCCCACTGGGTA
+	chr6	30828232	GTGGGGATCGCGTGTCAGTAC
+	chr6	30828239	GCGCGTGTCAGTACTGGGGTT
-	chr6	30829191	GAACGGTTATAGGGTCCAAT
+	chr6	30846420	GAGAGGTCCGTGAACAATCC
+	chr6	30850298	GCTAGCCCCTCAATAGCGCAG
+	chr6	30852533	GCGTGGCTACGTGACTTACTG
+	chr6	30855430	GCAAGTTTGCAGGAACGGACG
+	chr6	30855442	GAACGGACGGGGTTTGCTCCA
+	chr6	30883766	GCCCACCATTAGACAAGCGT
-	chr6	30895643	GTGATAGTGGGTGGGATCGCC
-	chr6	30895643	GGCGATCCCACCCACTATCA
+	chr6	30895742	GTGAACAGGCCGGCAAAGTGT
-	chr6	30900625	GCAAGCGGAACGTGCTATGGA
+	chr6	30910694	GCAACTCACTTTGCCGGGTTG
+	chr6	30910922	GTGGATTATGCGCAAACACCT
+	chr6	30915578	GCTCAGCCGGTATCCAGTCCA
-	chr6	30918830	GAATGTACCATTCGGACTAGT
-	chr6	30918831	GCAATGTACCATTCGGACTAG
+	chr6	30918832	GTAGTCCGAATGGTACATTGT
+	chr6	30931048	GCAATTCCCATTGAGCGTGGC
+	chr6	30931048	GCCACGCTCAATGGGAATTG
+	chr6	30932024	GTCCAGTGCCCCCGGCAATTG
-	chr6	30938328	GTAACTCCAGGCGATAGAGC
+	chr6	30938410	GCTACGCCTGACAGTCATCCG
+	chr6	30941516	GGCCTATTCAGTTTGCGCCT
-	chr6	30951475	GACACACGCGAGGAGTCGCG
+	chr6	30958841	GTCAGCCGTTGGAACGTCCTT
+	chr6	30959900	GGTTCTCGTTTGGGGAAGCG
+	chr6	30960013	GCTTGGCGGGCGGGTTACCT
+	chr6	30961067	GAGGCAGGCGCCCAAGCTCGC
-	chr6	30964681	GGTCCGGTCCTGCATGCCCA
-	chr6	30965116	GAGTAACGCAGCCGGTAGCTC
-	chr6	30965139	GCATCCAGCGGCGACCATCCC
-	chr6	30965140	GCCATCCAGCGGCGACCATCC
+	chr6	30965142	GATGGTCGCCGCTGGATGGGC
-	chr6	30966786	GCGAACCAGTCGGGCAACCA
+	chr6	30966795	GACTGGTTCGCTTCTACCCC
+	chr6	30966795	GGGGTAGAAGCGAACCAGTC
-	chr6	30966817	GCGCTCATGACCCGGTCAGCC
-	chr6	30967199	GCGTCATAGGTGGAGTCGTTG
-	chr6	30967210	GCACGGTATGTCCGTCATAGG
+	chr6	30968099	GTGGAATGTCGCTTCCGGCG
-	chr6	30968251	GTAACCAGGGCCCCGCAAAG
-	chr6	30968411	GCCTAATTGAGAAGTTTCGGT
-	chr6	30968501	GCAATAATAGTCACGGGCAAG
-	chr6	30969669	GCAGCCGGAAGACGTGGCTTG
-	chr6	30972735	GTCGTTTGCTAGGCGGTCACA
-	chr6	30972736	GTTCGTTTGCTAGGCGGTCAC
+	chr6	30972783	GGTCGACAGCCCTCAAGATC
+	chr6	30972831	GCGTAAGGGACACCCTTTGC
-	chr6	30973917	GCCCAACTAGGCAGTTCCGCG
-	chr6	30974642	GTCGCAGTCGTGAACTTCCCC
+	chr6	30974651	GCACGACTGCGAGTGACGTGT
+	chr6	30974756	GAACGCGGGGGAGTTCTTCC
-	chr6	30977618	GACTATTAGATTCGGGACCT
-	chr6	30984109	GTCTCGGGCCGTCGCTTAAT
+	chr6	30984110	GTTAAGCGACGGCCCGAGACT
+	chr6	30984137	GCGCGAGGAGGATCGACAGAG
+	chr6	30984350	GACCGCCGTACTTAGCAGAAG
-	chr6	30984805	GTCGGTTCAGTCCCCTTGAAG
+	chr6	30984876	GGGGTATTGGACCGATTGTA
+	chr6	30984877	GGGTATTGGACCGATTGTAT
+	chr6	30984955	GATGTAATGGGGTCTGCGGAG
+	chr6	30985710	GTGCTGAGCGGCCTCCGGATC
-	chr6	30986460	GACGTCCCGGGCATGCTTGTC
-	chr6	30986485	GCTCGGCGTACTTGTCAAGGG
-	chr6	30986488	GCTCCTCGGCGTACTTGTCAA
+	chr6	30986492	GCAAGTACGCCGAGGAGCGAT
+	chr6	30986495	GTACGCCGAGGAGCGATGGG
+	chr6	30987780	GCGTTACTACCCCACACGCC
+	chr6	30987889	GTATGCCTACACGGGTGAGGC
-	chr6	30988692	GCGTTGCTGCTCCCAGCAACG
-	chr6	30988692	GCGTTGCTGGGAGCAGCAACG
+	chr6	30989086	GTCACCGACCAGATCCGGCTC
+	chr6	30989087	GCACCGACCAGATCCGGCTCT
+	chr6	30992000	GAGGCGTGAGTATGATGGGC
+	chr6	30992958	GATCAGCCATCTCGGACATTG
+	chr6	30993281	GACTGCACGAGCATTGGGTG
-	chr6	30994645	GTCGCGAGTCGTCTGGATGAA
-	chr6	30995509	GTCGCCCGTGTAGATGCTGA
-	chr6	30998858	GACAGGTGCAAGTCGCCCGC
-	chr6	31000278	GTAGGGGGCAACCGAGATGC
+	chr6	31001215	GGGCCAACCCCCCCGTTAGG
-	chr6	31001227	GTACCCTGCACCTCCTAACGG
-	chr6	31001665	GTACCTTCGGGCGGCTAACAG
-	chr6	31005788	GAGGTCGTCGGCAGGATGGTA
-	chr6	31005789	GTAGGTCGTCGGCAGGATGGT
+	chr6	31005795	GCTGCCGACGACCTATAAGAC
-	chr6	31005797	GCTGTCTTATAGGTCGTCGGC
-	chr6	31007553	GAGCTGTACTTCTGGATCCGC
+	chr6	31008536	GAACGCATCCTGGATTGTCAG
-	chr6	31009562	GCAGGCGCTTATGCGCTATAA
+	chr6	31009568	GCGCATAAGCGCCTGTGAAGT
+	chr6	31012482	GATACCACGCGGGAAGTCTGA
+	chr6	31013210	GGCCGAGAAAAACACCGGTC
-	chr6	31013789	GAGGGTACGATGGGTTAATCT
-	chr6	31015167	GACGGTGGTTCTGTACAGGG
-	chr6	31016030	GCCAAGAGATGCTCGGTGTAC
+	chr6	31016212	GCTGCAGCGAGGGTCATTCGA
+	chr6	31020523	GCGGGCTATGATGGTTGTACG
+	chr6	31020586	GCACTACCAAAGTAGATCGTC
+	chr6	31020587	GACTACCAAAGTAGATCGTCT
-	chr6	31023188	GTCAAGGCGGCAACCGGAACC
+	chr6	31023194	GGTTGCCGCCTTGAGCTAAC
-	chr6	31024616	GAGCGCTGGTTCCGGATCAT
-	chr6	31028733	GCGGCGTGTCCGCATCATAT
+	chr6	31031177	GGAGGTTCTTCGCCCGGCAA
+	chr6	31031187	GCGCCCGGCAAAGGCGGACTG
+	chr6	31031333	GACTTAATCAGTAGGACGGGA
-	chr6	31031374	GCCCCGAGGTGTACTCCCCGA
-	chr6	31031588	GGATTCGGCGCAGTAGGGCT
-	chr6	31031594	GAGGAGGGGATTCGGCGCAGT
+	chr6	31031663	GAGCTCCTACCCCCGTGACAT
-	chr6	31031743	GTAACTCGCAGGGTGATCGG
+	chr6	31031744	GCGATCACCCTGCGAGTTACG
-	chr6	31033071	GGGGTCAAAATCGTGGTTAG
+	chr6	31033357	GCATAATCCCCGGATAGAGAC
-	chr6	31037373	GCATAGCAACGACTGTGCAGC
+	chr6	31038940	GAACGTCCCAAAGAGTGATGG
-	chr6	31040241	GTAGAGACCGTGGTGAAGGCC
+	chr6	31047022	GCGTAATAGCATATGGGCTG
-	chr6	31050942	GAATAGGAGTACGCATCCCCA
-	chr6	31051804	GGGACTGCGCGCTTAGTCTG
-	chr6	31052258	GTATGCGAATGAGTCAACTGT
-	chr6	31060838	GCTGACGAGGAATTAGGTGTA
+	chr6	31063682	GCCAGAAGGCGTACGTGGTAA
+	chr6	31074230	GACCGAGGGACCCATTTCGC
-	chr6	31074471	GCGTTGTCCTAGACGGTCACA
+	chr6	31075599	GTATACTCACGCTGCACAACG
-	chr6	31080464	GTATGTACGCCCAAGATGTGG
-	chr6	31080465	GTTATGTACGCCCAAGATGTG
-	chr6	31080467	GCTTTATGTACGCCCAAGATG
+	chr6	31083325	GATCTAAGCCGGTACAGGGTG
+	chr6	31083462	GCTACGTAATTGCCGGGTCCC
+	chr6	31087697	GAAACCGGAGTTCGGCCACTG
-	chr6	31088486	GATCCACTGTAATGGGGCTAC
-	chr6	31094722	GCTGACTGAGATCGCTTGTC
-	chr6	31102148	GTTCTCGGATCCTGCCGTAG
-	chr6	31106928	GTGGCGGCTTAGGTAGCGAT
-	chr6	31107667	GTATCGCGATGGGTTCAGAAG
-	chr6	31107678	GTGAGGAAACGTTATCGCGAT
-	chr6	31109138	GACAATCGGAAGCCCGCATTT
+	chr6	31113122	GCGTCTGCAGAATGGATCGCT
+	chr6	31113740	GTAAGTATGCCCAGTCTAGTG
-	chr6	31117188	GCGGCACACCACCTTTTCGAG
+	chr6	31122130	GCTTTACAGACGTGTGTTGCA
+	chr6	31122134	GACAGACGTGTGTTGCATGGC
-	chr6	31122405	GTGAGGATCTAGACCGTAGCA
+	chr6	31130239	GACAGGGCCAGTCCCGAGCGA
+	chr6	31130250	GCCCGAGCGAAGGTACGGAAT
-	chr6	31130253	GCCTATTCCGTACCTTCGCTC
-	chr6	31130254	GACCTATTCCGTACCTTCGCT
-	chr6	31136140	GTACGGTGGCCAGTCCCACAC
+	chr6	31142002	GCCCAGTCTGAAAACAAGTCG
-	chr6	31142262	GGAAACTCACGAATACCTCG
-	chr6	31153628	GCGTTGAGTTAGGAGATCTA
-	chr6	31154122	GGTTTCTCTATTAATCGGCC
-	chr6	31154616	GACCGCAGAGGTAGAACGCGT
-	chr6	31154617	GTACCGCAGAGGTAGAACGCG
+	chr6	31165550	GACGTATCCATTTCAGCTACT
-	chr6	31169265	GTTTCGGCGGTTATTCCTTGG
-	chr6	31180003	GATCGACCGGCACCTGCATG
-	chr6	31183084	GATAGTTCTTCGTCCCACAG
-	chr6	31183364	GAGGGCGCTTATCCAGAAGTT
-	chr6	31186243	GTTGGAGTGACGGCAGCGAA
+	chr6	31187568	GATTAGAACGGGGCAGTCGTC
-	chr6	31187735	GTGCTGCGGCTGAGGACCGCC
-	chr6	31187921	GTGAACATCCGCAGCCCGCTC
+	chr6	31191864	GATATCCCGGATGGAGCGGC
-	chr6	31192481	GCAAATCCTATGGTGGCTACG
-	chr6	31192585	GTGGTGGACCAGCACGGTTC
+	chr6	31192698	GTCGGGGATGTCCGAACTAC
+	chr6	31192699	GTCGGGGATGTCCGAACTACA
+	chr6	31192710	GCGAACTACAGGGACGCTGGT
+	chr6	31193228	GTACGCGTGGGGTCCTTACAA
+	chr6	31193973	GGCACTCGAGGACTAAGATT
-	chr6	31194199	GAGGTTCGTGGGGTTTCGTCC
-	chr6	31194436	GTGTTTGTAACACGTGGGACC
+	chr6	31195182	GTACCCGGTGGTCAACAACAC
-	chr6	31196440	GGTTAGGCAATGAGGAGCCG
-	chr6	31196440	GCGGCTCCTCATTGCCTAACC
-	chr6	31196538	GTACGGTAGGCAGGAGAGTTA
+	chr6	31197333	GTGCGGGAGTATCAGTATCGG
-	chr6	31198912	GCTGCACCGCCAGTCCACGT
+	chr6	31199304	GCCGTGCCCGTGCATTGGACC
-	chr6	31199306	GCCGGTCCAATGCACGGGCAC
-	chr6	31199307	GCCCGGTCCAATGCACGGGCA
-	chr6	31199313	GTTCTCACCCGGTCCAATGCA
+	chr6	31199640	GCGGGTAGGCACTTGGCTTC
+	chr6	31202926	GAGGCCGGAAAGACTTGTACC
+	chr6	31203212	GAGAGACCGGCGCCGACTCCT
-	chr6	31214484	GTCGGTCAGGATTAACGTGG
-	chr6	31214486	GAAGTCGGTCAGGATTAACGT
-	chr6	31214487	GAAAGTCGGTCAGGATTAACG
+	chr6	31216079	GTACATCACGCGGGCCTGGTG
-	chr6	31216619	GTTTCCGCATCAGGTCCACGT
-	chr6	31216620	GTTTCCGCATCAGGTCCACG
+	chr6	31219247	GACGCTGGGTCACCAACTCTG
-	chr6	31220631	GCTACGGGCAAGGTGTCGAGA
-	chr6	31220632	GTCTACGGGCAAGGTGTCGAG
-	chr6	31220987	GCGGGAAGAACGGAACCGCC
+	chr6	31221437	GTTGTCCTACGCACCCCGAA
-	chr6	31221445	GCCACACCATTCGGGGTGCGT
+	chr6	31222144	GTGTCGATCTAGCACCAATGA
+	chr6	31222149	GATCTAGCACCAATGACGGGC
-	chr6	31223768	GTTACGGGCAATCCGTTTCAC
+	chr6	31231853	GTAGCAGCGATCTGTAGGCTA
-	chr6	31241869	GTAGGTTCTTGAATCCCGAA
+	chr6	31244515	GCAGAAAACGCGGTAGTCATC
-	chr6	31245941	GTTCGACGGGGTTGGGGTGTG
-	chr6	31245948	GAGTGAGCTTCGACGGGGTTG
-	chr6	31245949	GAAGTGAGCTTCGACGGGGTT
-	chr6	31247226	GATTTGGCCAGTATCGGGAT
+	chr6	31249151	GTCCCGAGAGGGACGCAGACA
+	chr6	31249732	GACTTGCTCTCGACCCGGTCT
+	chr6	31251050	GACCAAGGGGGCTAGCGGGAC
-	chr6	31251122	GAGGATGTACGGCAGCTTGAT
-	chr6	31255955	GAGCTTAAACTTGGCCGTAGG
+	chr6	31258010	GAGCTCTGCGTATAACCCGGT
+	chr6	31258011	GCTCTGCGTATAACCCGGTG
-	chr6	31276289	GTGGGTCCGAGACTAGAAAGT
+	chr6	31276530	GTCTTAACGCATACAAACGCC
+	chr6	31276921	GCGCTCCATACAACATGGGCT
+	chr6	31277979	GCGTCGTATAAGAGCCACAGC
+	chr6	31277979	GCTGTGGCTCTTATACGACG
+	chr6	31277985	GCTCTTATACGACGTGGAGT
-	chr6	31280900	GAAGCCGGACGATGGAGTCCA
-	chr6	31280901	GTAAGCCGGACGATGGAGTCC
-	chr6	31296394	GCCGAGATTGCGTTCTGCAGG
-	chr6	31300752	GCCACGTCATAGACATCAAG
-	chr6	31304742	GCCTTCTACACAGGTGCCGGC
+	chr6	31337699	GCCGCACAGCAGGTCACTAGT
+	chr6	31341938	GTGATCCAGGGGCGTGGGCTA
+	chr6	31342461	GCATAACAAGCCTTACAGGCG
-	chr6	31345233	GTGCGTGTAAGTGATGGCGGC
+	chr6	31347273	GCGGGGAGACTCTGGGCGACC
+	chr6	31351571	GATGGCAGCACGTTGGCTAA
+	chr6	31356036	GGCAAATATGCTCTACCGGC
+	chr6	31363499	GTAGTGTGGGGGCGAATGCA
+	chr6	31370627	GCTCGATCTACCTGAGCTACA
+	chr6	31373342	GCAGAAATGACCGGGTCTACG
+	chr6	31374379	GGTGGGTCTCTAGCCTAGCA
-	chr6	31375894	GTCATCACGTACTTGGGCTG
+	chr6	31376625	GATGGCTTAAATAGCGGGTCC
+	chr6	31376631	GTAAATAGCGGGTCCGGGGCC
+	chr6	31377231	GTAGCGAACGCTGTCTGGTAG
+	chr6	31377515	GAGCACTTCCGGTAACCCGCG
+	chr6	31377523	GCGGTAACCCGCGTGGGGTGT
-	chr6	31377525	GCAACACCCCACGCGGGTTAC
+	chr6	31380116	GTGTAATTACCAGAAGTTCG
+	chr6	31380996	GCACTGAGTTAAGCGACCCTT
-	chr6	31381518	GTCCCGACTGGGGAGTCATG
-	chr6	31381519	GAGTCCCGACTGGGGAGTCAT
+	chr6	31384226	GTCACGCTCTGATTCTCGCCG
+	chr6	31384271	GTGTCGCCCACGAAGGCGCCG
+	chr6	31384328	GCGGCGGCCTTCAAGTACCCG
+	chr6	31384363	GCTCCGGGAACCCGCACATTG
+	chr6	31384364	GTCCGGGAACCCGCACATTGC
+	chr6	31384379	GATTGCGGGCGGGAGAGGCGC
-	chr6	31384489	GTGAGCGGCTCCGGTGCCGGG
-	chr6	31385893	GTGACTCCGATAGACGAACGT
-	chr6	31385894	GTGACTCCGATAGACGAACG
-	chr6	31386979	GTTATTAACTTCCGGATCACG
-	chr6	31388550	GACTGCGCTTTCCATCACGT
-	chr6	31404602	GGCCTAACTCGTAGTCTGCC
+	chr6	31406233	GCTACCATGCGGTCCGTATC
-	chr6	31406712	GCTACGGAACACCAAAGGTCC
+	chr6	31408304	GAAGGATTCGTTTGATGTCG
+	chr6	31417032	GTAGCGGCAGATGCGATAGGC
+	chr6	31419328	GCTTGGCTAAAGCGTCGTGCC
+	chr6	31419336	GAAGCGTCGTGCCTGGATAAG
+	chr6	31425669	GGTTGCGGGGTAGTGCTTCT
-	chr6	31431872	GCTCCTATAGGTCGCCGGGGA
+	chr6	31431874	GCCCGGCGACCTATAGGAGAT
-	chr6	31432161	GAGCATGTACGGCTGCGACGT
-	chr6	31432162	GAGCATGTACGGCTGCGACG
-	chr6	31432162	GCGTCGCAGCCGTACATGCTC
-	chr6	31433128	GCCGAGGGCCGCGTCTGCAAT
-	chr6	31433129	GTCCGAGGGCCGCGTCTGCAA
+	chr6	31433387	GTGTAGGGAAACTGAGCACG
+	chr6	31441708	GTATACACGTAAGGAGCTTT
+	chr6	31441829	GGCAAGAGTCCCATATGCGA
+	chr6	31442143	GAATACATCCGAGAGAACGCC
+	chr6	31444969	GGCCGAGTGTGTGACGATAG
-	chr6	31453013	GTGCAACTCCCGAATAGGCT
-	chr6	31458128	GTAACTATGGGAGACGGATG
-	chr6	31458910	GTGAGCGAAATTCAACGTGA
+	chr6	31460851	GCTAGTTCGGCCTTGGTAGG
+	chr6	31462300	GCCTGGGACGTAATATCGCTT
-	chr6	31462303	GCCGAAGCGATATTACGTCCC
+	chr6	31462304	GGACGTAATATCGCTTCGGT
+	chr6	31462310	GAATATCGCTTCGGTTGGGAT
+	chr6	31462311	GATATCGCTTCGGTTGGGATA
+	chr6	31462312	GTATCGCTTCGGTTGGGATAG
-	chr6	31471866	GCGTGCCCGACACAAGGGTCC
-	chr6	31477678	GACGCACATCTCTTAGTCGTT
-	chr6	31477678	GAACGACTAAGAGATGTGCGT
-	chr6	31477679	GACGACTAAGAGATGTGCGTT
-	chr6	31477679	GAACGCACATCTCTTAGTCGT
+	chr6	31477680	GCGACTAAGAGATGTGCGTTG
-	chr6	31485718	GAGCAACGAACGGTGTGGGCT
+	chr6	31487072	GCTACGGCGATATCTAGAATC
+	chr6	31488506	GAACTCACTAGGGCGCATCC
+	chr6	31520997	GTAGTCGTGGCCTGACTAAAC
+	chr6	31525443	GTAAGTGAGGACCGTGACCT
-	chr6	31542507	GTGGTGAGCCGTGATGTGTCC
-	chr6	31542507	GGACACATCACGGCTCACCA
-	chr6	31543247	GCTTATAAAGCACGGTTCCGG
-	chr6	31543247	GCCGGAACCGTGCTTTATAAG
+	chr6	31543248	GTTATAAAGCACGGTTCCGGT
+	chr6	31547006	GCAACCTACTCGTGGGTGCCC
+	chr6	31551912	GTGACGATTCTTTCACTCCA
-	chr6	31556524	GCGCAATGGATCGGTGGTCT
+	chr6	31556526	GACCACCGATCCATTGCGCCC
+	chr6	31556624	GAGCTGCCGCTCGTTGCCATC
-	chr6	31558419	GAAGGATGGCGCAGACTCTTA
-	chr6	31566711	GCGGGTAGCGGAGGAAAGTCA
+	chr6	31570600	GCAAAAAGCTTTCGGGCGCCG
-	chr6	31570635	GCGGTCGCTCACAAAATTCA
-	chr6	31570636	GCGCGGTCGCTCACAAAATTC
-	chr6	31573676	GCGCGAGCGCAGCCAAAATCA
+	chr6	31575061	GCTGCCCATCTTACGGCGCCC
-	chr6	31575067	GACCCAGGGCGCCGTAAGAT
-	chr6	31586209	GACTGAACAAAGGGCGAACGT
-	chr6	31586795	GCATAACGGTGTGACGGGGCG
-	chr6	31591429	GTATGCTTAGAGCGGGATAC

## Sheet: ineffective-gDNA
strand	chr	start	seq	Candidate regulatory regions
-	chr6	30523114	GCCATTGGACTTGGAGACTCA	DHS_1	CTCF_1	-
-	chr6	30523209	GCCCAGCCAGCTAGTGTGCAG	DHS_1	CTCF_1	-
-	chr6	30523210	GCCAGCCAGCTAGTGTGCAGG	DHS_1	CTCF_1	-
-	chr6	30523214	GCCAGCTAGTGTGCAGGTTGC	DHS_1	CTCF_1	-
-	chr6	30526786	GCCTCAACTTAAATAGTGCTG	DHS_2	-	-
-	chr6	30526822	GCCGCGGCTTGTAGTCGAGGA	DHS_2	-	-
-	chr6	30526846	GCCCACGAGGCTTTAGCTGCT	DHS_2	-	-
-	chr6	30526847	GCCACGAGGCTTTAGCTGCTG	DHS_2	-	-
-	chr6	30526900	GCCCGGGCTCAGGGAACCAGC	DHS_2	-	-
-	chr6	30526901	GCCGGGCTCAGGGAACCAGCG	DHS_2	-	-
-	chr6	30526915	GCCAGCGCTGCTTCTCTCCGA	DHS_2	-	-
-	chr6	30526931	GCCGAGGCTCGCGGCCTGAGA	DHS_2	-	-
-	chr6	30529487	GCCGACACGGGAGCAGGGCGC	DHS_3	CTCF_2	-
-	chr6	30529524	GCCTGTTCTGCAGCTGGAAAC	DHS_3	CTCF_2	-
-	chr6	30529543	GCCGAACGGGACCCTGTGGAA	DHS_3	CTCF_2	-
-	chr6	30529554	GCCTGTGGAAGTCGCGGGTGG	DHS_3	CTCF_2	-
-	chr6	30539492	GCCGCAAACCGCAGCCATGGC	DHS_4	-	-
-	chr6	30539499	GCCGCAGCCATGGCAGAGGAA	DHS_4	-	-
-	chr6	30539505	GCCATGGCAGAGGAACCTCAG	DHS_4	-	-
-	chr6	30539519	GCCTCAGCTTAAATAGTGTGG	DHS_4	-	-
-	chr6	30540922	GCCCAAGCTCCATTCAGCCTG	DHS_5	-	-
-	chr6	30540923	GCCAAGCTCCATTCAGCCTGG	DHS_5	-	-
-	chr6	30557923	GCCGAAGGGGAACCTGGGGAG	DHS_6	CTCF_3	-
-	chr6	30558006	GCCGCTGCCGCTCTACGCTTG	DHS_6	CTCF_3	-
-	chr6	30558012	GCCGCTCTACGCTTGGGTTCT	DHS_6	CTCF_3	-
-	chr6	30559505	GCCCTTTAAAAGCTGTTTGGG	CTCF_4	-	-
-	chr6	30559506	GCCTTTAAAAGCTGTTTGGGC	CTCF_4	-	-
-	chr6	30559534	GCCATTCAATGAGAAACTTCA	CTCF_4	-	-
-	chr6	30559615	GCCATTAGGGGTCGCACCAGT	CTCF_4	-	-
-	chr6	30559712	GCCTATACTAGGCACACTATT	CTCF_4	-	-
-	chr6	30565109	GCCCGTTCCTCTCGTAACCTG	DHS_7	Promoter_1	-
-	chr6	30565110	GCCGTTCCTCTCGTAACCTGG	DHS_7	Promoter_1	-
-	chr6	30565115	GCCTCTCGTAACCTGGTCATG	DHS_7	Promoter_1	-
-	chr6	30565125	GCCTGGTCATGTGTCCTTCTT	DHS_7	Promoter_1	-
-	chr6	30565145	GCCTGGATACTCATGACGCAG	DHS_7	Promoter_1	-
-	chr6	30565207	GCCAATCAGCGTCGCCACGAC	DHS_7	Promoter_1	-
-	chr6	30565220	GCCACGACTCCCGACTATAAA	DHS_7	Promoter_1	-
-	chr6	30565228	GCCCGACTATAAAGTCCCCAT	DHS_7	Promoter_1	-
-	chr6	30565242	GCCCCATCCGGACTCAAGAAG	DHS_7	Promoter_1	-
-	chr6	30565243	GCCCATCCGGACTCAAGAAGT	DHS_7	Promoter_1	-
-	chr6	30565244	GCCATCCGGACTCAAGAAGTT	DHS_7	Promoter_1	-
-	chr6	30565248	GCCGGACTCAAGAAGTTCTCA	DHS_7	Promoter_1	-
-	chr6	30565679	GCCAGGGACACCGCACAGATT	DHS_8	-	-
-	chr6	30565688	GCCGCACAGATTTTCCGAGTG	DHS_8	-	-
-	chr6	30566004	GCCCTGCAGTGGATGCATGGC	DHS_9	-	-
-	chr6	30566005	GCCTGCAGTGGATGCATGGCT	DHS_9	-	-
-	chr6	30569570	GCCAGGCCACAGGAGAGAGTG	DHS_10	CTCF_5	-
-	chr6	30569689	GCCAGCCTGCAACCCATTCGA	DHS_10	CTCF_5	-
-	chr6	30569693	GCCTGCAACCCATTCGAGCAG	DHS_10	CTCF_5	-
-	chr6	30569700	GCCCATTCGAGCAGCCACGTA	DHS_10	CTCF_5	-
-	chr6	30569701	GCCATTCGAGCAGCCACGTAG	DHS_10	CTCF_5	-
-	chr6	30590996	GCCTCAAAGGAAGGCTAGGAA	DHS_11	enhancer_1	-
-	chr6	30591031	GCCCTAGTCGTAGTTCTTCAC	DHS_11	enhancer_1	-
-	chr6	30591102	GCCCCACAGAGCAAGACAAAA	DHS_11	enhancer_1	-
-	chr6	30591278	GCCCCGATCCCTACCAACCCA	DHS_11	enhancer_1	-
-	chr6	30591279	GCCCGATCCCTACCAACCCAC	DHS_11	enhancer_1	-
-	chr6	30591280	GCCGATCCCTACCAACCCACT	DHS_11	enhancer_1	-
-	chr6	30591285	GCCCTACCAACCCACTGCAGG	DHS_11	enhancer_1	-
-	chr6	30591286	GCCTACCAACCCACTGCAGGC	DHS_11	enhancer_1	-
-	chr6	30591295	GCCACTGCAGGCATATGAGCC	DHS_11	enhancer_1	-
-	chr6	30591313	GCCCTAAAATCTGGGAAAGGC	DHS_11	enhancer_1	-
-	chr6	30591314	GCCTAAAATCTGGGAAAGGCT	DHS_11	enhancer_1	-
-	chr6	30591340	GCCTAGGGGCCCTGGCCTCAC	DHS_11	enhancer_1	-
-	chr6	30591348	GCCCTGGCCTCACAGACTTGC	DHS_11	enhancer_1	-
-	chr6	30591367	GCCCAGGGGGGTAAATTCTCA	DHS_11	enhancer_1	-
-	chr6	30591405	GCCTCACGTCCTCACCGGCAG	DHS_11	enhancer_1	-
-	chr6	30591413	GCCTCACCGGCAGCCTAGATA	DHS_11	enhancer_1	-
-	chr6	30591418	GCCGGCAGCCTAGATAGATAG	DHS_11	enhancer_1	-
-	chr6	30591859	GCCGTGCGAAAGGCTGTTTGA	DHS_12	-	-
-	chr6	30591899	GCCCGCTCAGGTTACCCTCAG	DHS_12	-	-
-	chr6	30591912	GCCCTCAGAAAGGCTATGGAC	DHS_12	-	-
-	chr6	30591913	GCCTCAGAAAGGCTATGGACC	DHS_12	-	-
-	chr6	30591931	GCCCCGGACTCCGCCCCAGAT	DHS_12	-	-
-	chr6	30591932	GCCCGGACTCCGCCCCAGATT	DHS_12	-	-
-	chr6	30591933	GCCGGACTCCGCCCCAGATTG	DHS_12	-	-
-	chr6	30591940	GCCGCCCCAGATTGCATAACA	DHS_12	-	-
-	chr6	30591982	GCCTCTCTGGGATCTGTAGCC	DHS_12	-	-
-	chr6	30592028	GCCGAGTTTCTCTCAGCCGAG	DHS_12	-	-
-	chr6	30592288	GCCCTGTTTCCTGGATAGGAG	DHS_13	-	-
-	chr6	30592289	GCCTGTTTCCTGGATAGGAGA	DHS_13	-	-
-	chr6	30592296	GCCTGGATAGGAGACTACGTC	DHS_13	-	-
-	chr6	30592346	GCCTGTTTCCTGGCACAGACT	DHS_13	-	-
-	chr6	30592353	GCCTGGCACAGACTTGTAAGT	DHS_13	-	-
-	chr6	30592379	GCCTGCCCGCCTCCGCCCACA	DHS_13	-	-
-	chr6	30592384	GCCGCCTCCGCCCACAGCGTA	DHS_13	-	-
-	chr6	30592387	GCCTCCGCCCACAGCGTAAGC	DHS_13	-	-
-	chr6	30592390	GCCGCCCACAGCGTAAGCCGC	DHS_13	-	-
-	chr6	30592393	GCCCACAGCGTAAGCCGCGCT	DHS_13	-	-
-	chr6	30592394	GCCACAGCGTAAGCCGCGCTG	DHS_13	-	-
-	chr6	30592406	GCCGCGCTGGAACAGCTCACT	DHS_13	-	-
-	chr6	30592431	GCCCCAGATGTATGTGGAGTA	DHS_13	-	-
-	chr6	30592432	GCCCAGATGTATGTGGAGTAA	DHS_13	-	-
-	chr6	30592433	GCCAGATGTATGTGGAGTAAC	DHS_13	-	-
-	chr6	30608194	GCCCGGCCCATCCCACCGCCT	CTCF_6	-	-
-	chr6	30608200	GCCATCCCACCGCCTTGCTGT	CTCF_6	-	-
-	chr6	30608205	GCCACCGCCTTGCTGTGGCAG	CTCF_6	-	-
-	chr6	30608263	GCCAATCCCATTATGCCCCCA	CTCF_6	-	-
-	chr6	30608268	GCCCATTATGCCCCCATGACT	CTCF_6	-	-
-	chr6	30608269	GCCATTATGCCCCCATGACTT	CTCF_6	-	-
-	chr6	30608278	GCCCCATGACTTTATCCAAAC	CTCF_6	-	-
-	chr6	30608279	GCCCATGACTTTATCCAAACC	CTCF_6	-	-
-	chr6	30608280	GCCATGACTTTATCCAAACCT	CTCF_6	-	-
-	chr6	30608292	GCCAAACCTCATTATAGCCCA	CTCF_6	-	-
-	chr6	30608297	GCCTCATTATAGCCCAGGCCC	CTCF_6	-	-
-	chr6	30608420	GCCCTCTAGTGTGCAAAAAAG	CTCF_6	-	-
-	chr6	30608523	GCCAGGCATGGTACAGTAGCA	CTCF_6	-	-
-	chr6	30617354	GCCTCTCAGCCTGCAGTGATG	DHS_14	CTCF_7	-
-	chr6	30617362	GCCTGCAGTGATGCTACGACA	DHS_14	CTCF_7	-
-	chr6	30617382	GCCGGCAGATGGCGCTGCAAA	DHS_14	CTCF_7	-
-	chr6	30617425	GCCATTTACCAACGGCTGTTG	DHS_14	CTCF_7	-
-	chr6	30617432	GCCAACGGCTGTTGCGATCTC	DHS_14	CTCF_7	-
-	chr6	30617562	GCCGTATCAGTGCGAACCAGC	DHS_15	-	-
-	chr6	30617577	GCCAGCTGAATGTCAGCGCTG	DHS_15	-	-
-	chr6	30617599	GCCCTCCTGTGACAGAAGCCA	DHS_15	-	-
-	chr6	30617616	GCCACCGGCGCCTGCCTGAGG	DHS_15	-	-
-	chr6	30617619	GCCGGCGCCTGCCTGAGGGCA	DHS_15	-	-
-	chr6	30617625	GCCTGCCTGAGGGCACTCCCC	DHS_15	-	-
-	chr6	30617641	GCCCCTCACTGGGACTCTCAG	DHS_15	-	-
-	chr6	30617642	GCCCTCACTGGGACTCTCAGT	DHS_15	-	-
-	chr6	30617643	GCCTCACTGGGACTCTCAGTA	DHS_15	-	-
-	chr6	30617663	GCCACGCCCACCTGTCCCCAA	DHS_15	-	-
-	chr6	30617668	GCCCACCTGTCCCCAAGGTTT	DHS_15	-	-
-	chr6	30617669	GCCACCTGTCCCCAAGGTTTG	DHS_15	-	-
-	chr6	30617672	GCCTGTCCCCAAGGTTTGTTT	DHS_15	-	-
-	chr6	30617677	GCCCCAAGGTTTGTTTCATCA	DHS_15	-	-
-	chr6	30617678	GCCCAAGGTTTGTTTCATCAC	DHS_15	-	-
-	chr6	30617704	GCCACCTTCCAGCATTTTCAC	DHS_15	-	-
-	chr6	30618020	GCCCATCAGCAGCGTTCCACG	DHS_16	-	-
-	chr6	30618021	GCCATCAGCAGCGTTCCACGC	DHS_16	-	-
-	chr6	30618060	GCCTCCCCTAGCTTCATCACA	DHS_16	-	-
-	chr6	30618064	GCCCTAGCTTCATCACACCAC	DHS_16	-	-
-	chr6	30618065	GCCTAGCTTCATCACACCACG	DHS_16	-	-
-	chr6	30618080	GCCACGTTACTAGGTTTTTCC	DHS_16	-	-
-	chr6	30618153	GCCTCAGCCTTCTCTGCTCCC	DHS_16	-	-
-	chr6	30618170	GCCCCACACCTATATGTTGAT	DHS_16	-	-
-	chr6	30618171	GCCCACACCTATATGTTGATG	DHS_16	-	-
-	chr6	30618172	GCCACACCTATATGTTGATGA	DHS_16	-	-
-	chr6	30620464	GCCAAACACCTTAGCCTCTTT	DHS_17	CTCF_8	-
-	chr6	30620471	GCCTTAGCCTCTTTAAATATA	DHS_17	CTCF_8	-
-	chr6	30620503	GCCTTGGTTAACAGGGTCTGT	DHS_17	CTCF_8	-
-	chr6	30620607	GCCATCTAGTGGGCAACCTGT	DHS_17	CTCF_8	-
-	chr6	30620622	GCCTGTCCAACTACACTTTTT	DHS_17	CTCF_8	-
-	chr6	30620627	GCCAACTACACTTTTTGCTAT	DHS_17	CTCF_8	-
-	chr6	30631339	GCCCCTGAGAAGGCTGCTGGT	DHS_18	-	-
-	chr6	30631389	GCCCCGTCCGAGGTGTCGGTC	DHS_18	-	-
-	chr6	30631390	GCCCGTCCGAGGTGTCGGTCT	DHS_18	-	-
-	chr6	30631391	GCCGTCCGAGGTGTCGGTCTG	DHS_18	-	-
-	chr6	30631395	GCCGAGGTGTCGGTCTGTTCC	DHS_18	-	-
-	chr6	30631433	GCCGCTGCGGCTGTTGGAACT	DHS_18	-	-
-	chr6	30631462	GCCCATCTTGAAGCCCTGCGG	DHS_18	-	-
-	chr6	30631474	GCCCTGCGGGGAGGGGCCGGT	DHS_18	-	-
-	chr6	30631475	GCCTGCGGGGAGGGGCCGGTG	DHS_18	-	-
-	chr6	30631987	GCCGCCGAGCTCCCGCCGCCT	DHS_19	-	-
-	chr6	30631990	GCCGAGCTCCCGCCGCCTCAA	DHS_19	-	-
-	chr6	30631997	GCCCGCCGCCTCAACTGACTG	DHS_19	-	-
-	chr6	30632001	GCCGCCTCAACTGACTGCCCC	DHS_19	-	-
-	chr6	30632031	GCCCCGCCGCAGGGGCCCGGG	DHS_19	-	-
-	chr6	30632032	GCCCGCCGCAGGGGCCCGGGA	DHS_19	-	-
-	chr6	30632033	GCCGCCGCAGGGGCCCGGGAC	DHS_19	-	-
-	chr6	30632036	GCCGCAGGGGCCCGGGACCCT	DHS_19	-	-
-	chr6	30632052	GCCCTAGAGGAGGCGGGGCTA	DHS_19	-	-
-	chr6	30632094	GCCCGACAGAATTACCGCCGC	DHS_19	-	-
-	chr6	30632095	GCCGACAGAATTACCGCCGCG	DHS_19	-	-
-	chr6	30632107	GCCGCCGCGGCGGCGATGGAA	DHS_19	-	-
-	chr6	30632330	GCCTTGCGCTCCCGGGAGAAC	DHS_20	CTCF_9	-
-	chr6	30632339	GCCCGGGAGAACCTACCACTC	DHS_20	CTCF_9	-
-	chr6	30632340	GCCGGGAGAACCTACCACTCA	DHS_20	CTCF_9	-
-	chr6	30632349	GCCTACCACTCACCTGGAGGG	DHS_20	CTCF_9	-
-	chr6	30632353	GCCACTCACCTGGAGGGGGCG	DHS_20	CTCF_9	-
-	chr6	30632360	GCCTGGAGGGGGCGGCGGAGC	DHS_20	CTCF_9	-
-	chr6	30632398	GCCTAGGGGAGAGGGGGCGTG	DHS_20	CTCF_9	-
-	chr6	30632443	GCCCCGGGCTTGACCTTAGTG	DHS_20	CTCF_9	-
-	chr6	30632444	GCCCGGGCTTGACCTTAGTGG	DHS_20	CTCF_9	-
-	chr6	30632455	GCCTTAGTGGAAAGCCGAGAC	DHS_20	CTCF_9	-
-	chr6	30632468	GCCGAGACTGCGTCCAGGTTG	DHS_20	CTCF_9	-
-	chr6	30632643	GCCCAAGCGGGACAAGGACTT	DHS_21	Promoter_2	-
-	chr6	30632707	GCCATAGTAACCGAGGACCGG	DHS_21	Promoter_2	-
-	chr6	30632716	GCCGAGGACCGGATGTGGCGA	DHS_21	Promoter_2	-
-	chr6	30632723	GCCGGATGTGGCGATCTTACG	DHS_21	Promoter_2	-
-	chr6	30632948	GCCGCCGCAGATGTTCTCCGC	DHS_22	-	-
-	chr6	30632951	GCCGCAGATGTTCTCCGCAAC	DHS_22	-	-
-	chr6	30632964	GCCGCAACCTTCCGGAAGTGG	DHS_22	-	-
-	chr6	30632974	GCCGGAAGTGGAATGGCGGGA	DHS_22	-	-
-	chr6	30632995	GCCTCAGCATTGCTGCCCACC	DHS_22	-	-
-	chr6	30633009	GCCCACCGACCCCCCGGAAGC	DHS_22	-	-
-	chr6	30633010	GCCACCGACCCCCCGGAAGCG	DHS_22	-	-
-	chr6	30633013	GCCGACCCCCCGGAAGCGGAA	DHS_22	-	-
-	chr6	30633017	GCCCCCCGGAAGCGGAAACAG	DHS_22	-	-
-	chr6	30633018	GCCCCCGGAAGCGGAAACAGA	DHS_22	-	-
-	chr6	30633019	GCCCCGGAAGCGGAAACAGAA	DHS_22	-	-
-	chr6	30633020	GCCCGGAAGCGGAAACAGAAT	DHS_22	-	-
-	chr6	30633021	GCCGGAAGCGGAAACAGAATC	DHS_22	-	-
-	chr6	30633040	GCCCCGCGTGCCCCTTCCTCA	DHS_22	-	-
-	chr6	30633042	GCCGCGTGCCCCTTCCTCACT	DHS_22	-	-
-	chr6	30633055	GCCTCACTACCCTCCAAATCC	DHS_22	-	-
-	chr6	30633063	GCCCTCCAAATCCCGCTGCAG	DHS_22	-	-
-	chr6	30633064	GCCTCCAAATCCCGCTGCAGC	DHS_22	-	-
-	chr6	30633073	GCCCGCTGCAGCCATTGCCGC	DHS_22	-	-
-	chr6	30633074	GCCGCTGCAGCCATTGCCGCA	DHS_22	-	-
-	chr6	30633083	GCCATTGCCGCAGACACGATG	DHS_22	-	-
-	chr6	30633089	GCCGCAGACACGATGCCGAAA	DHS_22	-	-
-	chr6	30646993	GCCCAGACAGTCGTAAACGCC	DHS_23	Promoter_3	-
-	chr6	30646994	GCCAGACAGTCGTAAACGCCA	DHS_23	Promoter_3	-
-	chr6	30647011	GCCATGTGTTTACGCGACTGG	DHS_23	Promoter_3	-
-	chr6	30647047	GCCCCGCTCCGTCATTGCAGG	DHS_23	Promoter_3	-
-	chr6	30647048	GCCCGCTCCGTCATTGCAGGC	DHS_23	Promoter_3	-
-	chr6	30647049	GCCGCTCCGTCATTGCAGGCC	DHS_23	Promoter_3	-
-	chr6	30647054	GCCGTCATTGCAGGCCACGCC	DHS_23	Promoter_3	-
-	chr6	30647067	GCCACGCCTCCACTGAACCAG	DHS_23	Promoter_3	-
-	chr6	30647072	GCCTCCACTGAACCAGGGCCA	DHS_23	Promoter_3	-
-	chr6	30647083	GCCAGGGCCACGCCCCCGAGA	DHS_23	Promoter_3	-
-	chr6	30647089	GCCACGCCCCCGAGATGACGG	DHS_23	Promoter_3	-
-	chr6	30647094	GCCCCCGAGATGACGGCGAAG	DHS_23	Promoter_3	-
-	chr6	30647095	GCCCCGAGATGACGGCGAAGC	DHS_23	Promoter_3	-
-	chr6	30647096	GCCCGAGATGACGGCGAAGCT	DHS_23	Promoter_3	-
-	chr6	30647097	GCCGAGATGACGGCGAAGCTC	DHS_23	Promoter_3	-
-	chr6	30647408	GCCGGGCCCCTGCGGGAGTTA	DHS_24	-	-
-	chr6	30647413	GCCCCTGCGGGAGTTACTGCG	DHS_24	-	-
-	chr6	30647414	GCCCTGCGGGAGTTACTGCGC	DHS_24	-	-
-	chr6	30647415	GCCTGCGGGAGTTACTGCGCA	DHS_24	-	-
-	chr6	30647441	GCCGTGGGCCCGGGAGGAGTT	DHS_24	-	-
-	chr6	30647463	GCCGGGGAGGAGTGGGTTTGG	DHS_24	-	-
-	chr6	30647523	GCCTAAGTGAGACTGGGCGAG	DHS_24	-	-
-	chr6	30673211	GCCACTTTGGGCCTACATGCA	DHS_25	CTCF_10	-
-	chr6	30673237	GCCTTTCAGATACTGATAAAA	DHS_25	CTCF_10	-
-	chr6	30673267	GCCCTCATGTGGCCAATGCTG	DHS_25	CTCF_10	-
-	chr6	30673268	GCCTCATGTGGCCAATGCTGG	DHS_25	CTCF_10	-
-	chr6	30677478	GCCTTGTCCATGACATCCTGA	DHS_26	-	-
-	chr6	30677588	GCCTCACGTTCTGCCTAGCTA	DHS_26	-	-
-	chr6	30677600	GCCTAGCTACCAACAGTAGTG	DHS_26	-	-
-	chr6	30677608	GCCAACAGTAGTGACTCTCAC	DHS_26	-	-
-	chr6	30677627	GCCCACTCCCCAAAAGCTTGT	DHS_26	-	-
-	chr6	30677633	GCCCCAAAAGCTTGTATGGGA	DHS_26	-	-
-	chr6	30677634	GCCCAAAAGCTTGTATGGGAC	DHS_26	-	-
-	chr6	30677635	GCCAAAAGCTTGTATGGGACA	DHS_26	-	-
-	chr6	30689785	GCCTAGAACCTCCACGCTTCA	enhancer_2	-	-
-	chr6	30689792	GCCTCCACGCTTCAGTGCAGG	enhancer_2	-	-
-	chr6	30689795	GCCACGCTTCAGTGCAGGACT	enhancer_2	-	-
-	chr6	30689893	GCCAATACCACCCTCAGATAG	enhancer_2	-	-
-	chr6	30689899	GCCACCCTCAGATAGGGCATG	enhancer_2	-	-
-	chr6	30689902	GCCCTCAGATAGGGCATGGCT	enhancer_2	-	-
-	chr6	30689934	GCCAAATGCCACAGCACTGCA	enhancer_2	-	-
-	chr6	30689941	GCCACAGCACTGCATGAGTTG	enhancer_2	-	-
-	chr6	30690705	GCCTAGCAGCAACGAGCACAG	DHS_27	CTCF_11	-
-	chr6	30690814	GCCTCCCACTTGACCAAGTTT	DHS_27	CTCF_11	-
-	chr6	30690818	GCCACTTGACCAAGTTTCTAG	DHS_27	CTCF_11	-
-	chr6	30690826	GCCAAGTTTCTAGGGCGGCCC	DHS_27	CTCF_11	-
-	chr6	30691141	GCCGGCTACCATCGACCACCC	DHS_28	CTCF_12	-
-	chr6	30691148	GCCATCGACCACCCCCATCCT	DHS_28	CTCF_12	-
-	chr6	30691158	GCCCCCATCCTCCCTATAGAG	DHS_28	CTCF_12	-
-	chr6	30691159	GCCCCATCCTCCCTATAGAGG	DHS_28	CTCF_12	-
-	chr6	30691262	GCCTGCAACGCCGCTTGGAAG	DHS_28	CTCF_12	-
-	chr6	30691827	GCCACAAGATCCACCATCTCT	DHS_29	-	-
-	chr6	30691836	GCCACCATCTCTTGTATGTGA	DHS_29	-	-
-	chr6	30691865	GCCCTTTTGAAGACTGCTGCT	DHS_29	-	-
-	chr6	30691866	GCCTTTTGAAGACTGCTGCTA	DHS_29	-	-
-	chr6	30691909	GCCTTATATAAACACATATGG	DHS_29	-	-
-	chr6	30691958	GCCAAGGGTTAACCATCAAAA	DHS_29	-	-
-	chr6	30692004	GCCTCTCTTTGCCTGCAGCAA	DHS_29	-	-
-	chr6	30693039	GCCGCCCAACGCGCCCAAACG	DHS_30	Promoter_4	-
-	chr6	30693043	GCCAACGCGCCCAAACGTGCT	DHS_30	Promoter_4	-
-	chr6	30693051	GCCCAAACGTGCTAGTGAAAC	DHS_30	Promoter_4	-
-	chr6	30693052	GCCAAACGTGCTAGTGAAACG	DHS_30	Promoter_4	-
-	chr6	30693072	GCCCTTGTCGCGAGACATTAT	DHS_30	Promoter_4	-
-	chr6	30693073	GCCTTGTCGCGAGACATTATA	DHS_30	Promoter_4	-
-	chr6	30693118	GCCCAAATGACAACTCGCCAA	DHS_30	Promoter_4	-
-	chr6	30693119	GCCAAATGACAACTCGCCAAC	DHS_30	Promoter_4	-
-	chr6	30693134	GCCAACTGATTGGCTACTCTC	DHS_30	Promoter_4	-
-	chr6	30693160	GCCTTTGCTCCGCCCCTTTCC	DHS_30	Promoter_4	-
-	chr6	30693199	GCCTTCCTGCCTCCCTGTCGC	DHS_30	Promoter_4	-
-	chr6	30693203	GCCTGCCTCCCTGTCGCGTGC	DHS_30	Promoter_4	-
-	chr6	30693207	GCCTCCCTGTCGCGTGCGCGT	DHS_30	Promoter_4	-
-	chr6	30693471	GCCCCCATGCCTTCCCTTTCA	DHS_31	Promoter_5	-
-	chr6	30693472	GCCCCATGCCTTCCCTTTCAC	DHS_31	Promoter_5	-
-	chr6	30693473	GCCCATGCCTTCCCTTTCACG	DHS_31	Promoter_5	-
-	chr6	30693474	GCCATGCCTTCCCTTTCACGC	DHS_31	Promoter_5	-
-	chr6	30693479	GCCTTCCCTTTCACGCTTCCG	DHS_31	Promoter_5	-
-	chr6	30693483	GCCCTTTCACGCTTCCGTCCT	DHS_31	Promoter_5	-
-	chr6	30693484	GCCTTTCACGCTTCCGTCCTG	DHS_31	Promoter_5	-
-	chr6	30693496	GCCGTCCTGACGCAAACGTGG	DHS_31	Promoter_5	-
-	chr6	30693500	GCCTGACGCAAACGTGGGGCC	DHS_31	Promoter_5	-
-	chr6	30693518	GCCGCCTTCCGCACTGCGGGC	DHS_31	Promoter_5	-
-	chr6	30693521	GCCTTCCGCACTGCGGGCTTG	DHS_31	Promoter_5	-
-	chr6	30693553	GCCCTACTCAGTTTCCTGAAG	DHS_31	Promoter_5	-
-	chr6	30693554	GCCTACTCAGTTTCCTGAAGC	DHS_31	Promoter_5	-
-	chr6	30693566	GCCTGAAGCATGCGCAGTTGC	DHS_31	Promoter_5	-
-	chr6	30693590	GCCGTCAATTCCTGTCCTGGG	DHS_31	Promoter_5	-
-	chr6	30693599	GCCTGTCCTGGGCGTACGTCA	DHS_31	Promoter_5	-
-	chr6	30693604	GCCTGGGCGTACGTCAAGATG	DHS_31	Promoter_5	-
-	chr6	30702621	GCCGACCGCGCACAATGGGCC	DHS_32	CTCF_13	Promoter_6
-	chr6	30702625	GCCGCGCACAATGGGCCATGG	DHS_32	CTCF_13	Promoter_6
-	chr6	30702639	GCCATGGAGTTCCCGTTCGAT	DHS_32	CTCF_13	Promoter_6
-	chr6	30702649	GCCCGTTCGATGTGGACGCGC	DHS_32	CTCF_13	Promoter_6
-	chr6	30702650	GCCGTTCGATGTGGACGCGCT	DHS_32	CTCF_13	Promoter_6
-	chr6	30702674	GCCGGAGCGGATCACGGTGCT	DHS_32	CTCF_13	Promoter_6
-	chr6	30722205	GCCATCTCCCCACCTACCAGG	DHS_33	-	-
-	chr6	30722211	GCCCCACCTACCAGGTCTGCC	DHS_33	-	-
-	chr6	30722212	GCCCACCTACCAGGTCTGCCA	DHS_33	-	-
-	chr6	30722213	GCCACCTACCAGGTCTGCCAG	DHS_33	-	-
-	chr6	30722216	GCCTACCAGGTCTGCCAGTGA	DHS_33	-	-
-	chr6	30722229	GCCAGTGAGGAGCAGGCCTTG	DHS_33	-	-
-	chr6	30722304	GCCCCGCCAGCCCAGTCCTGG	DHS_33	-	-
-	chr6	30722365	GCCTGCAGGAACGTCGCAGCA	DHS_33	-	-
-	chr6	30722758	GCCCGCGGGCGCAGGCGCGCT	DHS_34	Promoter_7	-
-	chr6	30722759	GCCGCGGGCGCAGGCGCGCTT	DHS_34	Promoter_7	-
-	chr6	30722783	GCCGACAGAGCGCTTCAGCCG	DHS_34	Promoter_7	-
-	chr6	30722800	GCCGCTTCCCTCGAGCCTGCA	DHS_34	Promoter_7	-
-	chr6	30722807	GCCTCGAGCCTGCAGTGCGCA	DHS_34	Promoter_7	-
-	chr6	30722868	GCCCTACCCCCCCGCCCCGGC	DHS_34	Promoter_7	-
-	chr6	30746489	GCCTCAGATTTCACCCTGGGA	CTCF_14	-	-
-	chr6	30746501	GCCCTGGGATCTTGGGGATTT	CTCF_14	-	-
-	chr6	30746536	GCCTATTCACCTTCTTGTCTG	CTCF_14	-	-
-	chr6	30746557	GCCGTTCCAGGACATTTCGAG	CTCF_14	-	-
-	chr6	30746562	GCCAGGACATTTCGAGTCCGA	CTCF_14	-	-
-	chr6	30746578	GCCGATCCTTGTCCCGCTGTC	CTCF_14	-	-
-	chr6	30746583	GCCTTGTCCCGCTGTCGAACC	CTCF_14	-	-
-	chr6	30746589	GCCCGCTGTCGAACCCGCTCA	CTCF_14	-	-
-	chr6	30746590	GCCGCTGTCGAACCCGCTCAG	CTCF_14	-	-
-	chr6	30746601	GCCCGCTCAGCAAAGGCATCA	CTCF_14	-	-
-	chr6	30746602	GCCGCTCAGCAAAGGCATCAC	CTCF_14	-	-
-	chr6	30746628	GCCAGGTCCTGAAGGCGTTCA	CTCF_14	-	-
-	chr6	30746634	GCCTGAAGGCGTTCACGCTCT	CTCF_14	-	-
-	chr6	30746656	GCCGTTCCCACTCATCTTCCG	CTCF_14	-	-
-	chr6	30746661	GCCCACTCATCTTCCGACTCT	CTCF_14	-	-
-	chr6	30746662	GCCACTCATCTTCCGACTCTG	CTCF_14	-	-
-	chr6	30746706	GCCCTGCAGCCCATCCAGGGG	CTCF_14	-	-
-	chr6	30746707	GCCTGCAGCCCATCCAGGGGA	CTCF_14	-	-
-	chr6	30746719	GCCAGGGGATTAAATAAGGGC	CTCF_14	-	-
-	chr6	30746774	GCCCTGCTTCTGACTTACCCT	CTCF_14	-	-
-	chr6	30746775	GCCTGCTTCTGACTTACCCTG	CTCF_14	-	-
-	chr6	30746850	GCCTGAGGTGTTTCCGCTTTT	CTCF_14	-	-
-	chr6	30746862	GCCGCTTTTTACGTTTCTTCT	CTCF_14	-	-
-	chr6	30746893	GCCAGCCCTACTCACAGTCTC	CTCF_14	-	-
-	chr6	30746897	GCCCTACTCACAGTCTCCTCA	CTCF_14	-	-
-	chr6	30748473	GCCTCGGCAGAGGTGCAGCGC	DHS_35	-	-
-	chr6	30748502	GCCGATCAGAAACTGGGCGAC	DHS_35	-	-
-	chr6	30748525	GCCGCTCGCTCAGCCCCAACA	DHS_35	-	-
-	chr6	30748537	GCCCCAACACCGAGTGCAGCT	DHS_35	-	-
-	chr6	30748538	GCCCAACACCGAGTGCAGCTC	DHS_35	-	-
-	chr6	30748545	GCCGAGTGCAGCTCGTCCTGA	DHS_35	-	-
-	chr6	30748560	GCCTGAACCCAGCGCTCCAGA	DHS_35	-	-
-	chr6	30748566	GCCCAGCGCTCCAGACCCGCC	DHS_35	-	-
-	chr6	30748567	GCCAGCGCTCCAGACCCGCCG	DHS_35	-	-
-	chr6	30748575	GCCAGACCCGCCGGCGTCGCC	DHS_35	-	-
-	chr6	30748580	GCCCGCCGGCGTCGCCATGGC	DHS_35	-	-
-	chr6	30748581	GCCGCCGGCGTCGCCATGGCG	DHS_35	-	-
-	chr6	30748584	GCCGGCGTCGCCATGGCGACT	DHS_35	-	-
-	chr6	30748593	GCCATGGCGACTCACGCTCCC	DHS_35	-	-
-	chr6	30748718	GCCTCTAGGATCTTCCGACAT	DHS_36	CTCF_15	Promoter_8
-	chr6	30748731	GCCGACATCCCAAAGCTGTCT	DHS_36	CTCF_15	Promoter_8
-	chr6	30748738	GCCCAAAGCTGTCTTCCCGTA	DHS_36	CTCF_15	Promoter_8
-	chr6	30748739	GCCAAAGCTGTCTTCCCGTAC	DHS_36	CTCF_15	Promoter_8
-	chr6	30748758	GCCGCGGAGCCCGGAAGGGGC	DHS_36	CTCF_15	Promoter_8
-	chr6	30748766	GCCCGGAAGGGGCTGTACTTT	DHS_36	CTCF_15	Promoter_8
-	chr6	30748767	GCCGGAAGGGGCTGTACTTTT	DHS_36	CTCF_15	Promoter_8
-	chr6	30748791	GCCTCTAAGCACTACGGTGGC	DHS_36	CTCF_15	Promoter_8
-	chr6	30748825	GCCTCGCGGAACCATACCTGA	DHS_36	CTCF_15	Promoter_8
-	chr6	30748835	GCCATACCTGAAAACTCGGGG	DHS_36	CTCF_15	Promoter_8
-	chr6	30748840	GCCTGAAAACTCGGGGTAATT	DHS_36	CTCF_15	Promoter_8
-	chr6	30748884	GCCAGTTTCTCTGACGCCCCC	DHS_36	CTCF_15	Promoter_8
-	chr6	30754822	GCCCGCCAAGCCCCTTCCGAG	DHS_37	CTCF_16	enhancer_3
-	chr6	30754823	GCCGCCAAGCCCCTTCCGAGT	DHS_37	CTCF_16	enhancer_3
-	chr6	30754831	GCCCCTTCCGAGTGCCTACAT	DHS_37	CTCF_16	enhancer_3
-	chr6	30754832	GCCCTTCCGAGTGCCTACATG	DHS_37	CTCF_16	enhancer_3
-	chr6	30754833	GCCTTCCGAGTGCCTACATGT	DHS_37	CTCF_16	enhancer_3
-	chr6	30754837	GCCGAGTGCCTACATGTAATC	DHS_37	CTCF_16	enhancer_3
-	chr6	30754863	GCCTCTCTCCTGGACCACAGC	DHS_37	CTCF_16	enhancer_3
-	chr6	30754870	GCCTGGACCACAGCGCCCGCT	DHS_37	CTCF_16	enhancer_3
-	chr6	30754876	GCCACAGCGCCCGCTCTGACA	DHS_37	CTCF_16	enhancer_3
-	chr6	30754906	GCCCTCGGGCCGGCGGAGCCT	DHS_37	CTCF_16	enhancer_3
-	chr6	30754907	GCCTCGGGCCGGCGGAGCCTC	DHS_37	CTCF_16	enhancer_3
-	chr6	30754914	GCCGGCGGAGCCTCCGCTTAC	DHS_37	CTCF_16	enhancer_3
-	chr6	30754926	GCCGCTTACCCACAATCAGGG	DHS_37	CTCF_16	enhancer_3
-	chr6	30754933	GCCCACAATCAGGGCCTTGGT	DHS_37	CTCF_16	enhancer_3
-	chr6	30754934	GCCACAATCAGGGCCTTGGTG	DHS_37	CTCF_16	enhancer_3
-	chr6	30754997	GCCTCATCCTCTTCGTCGTCG	DHS_37	CTCF_16	enhancer_3
-	chr6	30755003	GCCTCTTCGTCGTCGGGTTGG	DHS_37	CTCF_16	enhancer_3
-	chr6	30755060	GCCGGGCCCAGCTCCTCCAGT	DHS_37	CTCF_16	enhancer_3
-	chr6	30755065	GCCCAGCTCCTCCAGTACCGA	DHS_37	CTCF_16	enhancer_3
-	chr6	30755066	GCCAGCTCCTCCAGTACCGAA	DHS_37	CTCF_16	enhancer_3
-	chr6	30755196	GCCGCGGGGGTTGAGGGAGAG	DHS_37	CTCF_16	enhancer_3
-	chr6	30757938	GCCAACTTCTGACTGGGCTTC	DHS_38	enhancer_4	-
-	chr6	30758062	GCCCAACCAAGAGGCCTCTGG	DHS_38	enhancer_4	-
-	chr6	30758063	GCCAACCAAGAGGCCTCTGGG	DHS_38	enhancer_4	-
-	chr6	30758067	GCCAAGAGGCCTCTGGGGTAG	DHS_38	enhancer_4	-
-	chr6	30758364	GCCACCCCCACCCAAGCAGCG	DHS_39	enhancer_5	-
-	chr6	30758368	GCCCCACCCAAGCAGCGGCTG	DHS_39	enhancer_5	-
-	chr6	30758369	GCCCACCCAAGCAGCGGCTGC	DHS_39	enhancer_5	-
-	chr6	30758373	GCCCAAGCAGCGGCTGCTTCC	DHS_39	enhancer_5	-
-	chr6	30758374	GCCAAGCAGCGGCTGCTTCCT	DHS_39	enhancer_5	-
-	chr6	30758410	GCCTGAGCACAGATCTGGCAG	DHS_39	enhancer_5	-
-	chr6	30758439	GCCAGGGCCCAGGGTTCCCCA	DHS_39	enhancer_5	-
-	chr6	30758487	GCCCCAGGCTTCCTGTTTGGG	DHS_39	enhancer_5	-
-	chr6	30758488	GCCCAGGCTTCCTGTTTGGGC	DHS_39	enhancer_5	-
-	chr6	30758489	GCCAGGCTTCCTGTTTGGGCG	DHS_39	enhancer_5	-
-	chr6	30758497	GCCTGTTTGGGCGATCTGCTT	DHS_39	enhancer_5	-
-	chr6	30763041	GCCGGGCGGGGGCGGCGACCG	DHS_41	Promoter_9	-
-	chr6	30763678	GCCCCAGCGGTTGCCAGAGGG	DHS_42	CTCF_17	-
-	chr6	30763679	GCCCAGCGGTTGCCAGAGGGC	DHS_42	CTCF_17	-
-	chr6	30763690	GCCAGAGGGCGTGGTGGCTGC	DHS_42	CTCF_17	-
-	chr6	30763709	GCCCAGACTCCAGTTCGGTGC	DHS_42	CTCF_17	-
-	chr6	30763710	GCCAGACTCCAGTTCGGTGCT	DHS_42	CTCF_17	-
-	chr6	30763717	GCCAGTTCGGTGCTCCCAGGC	DHS_42	CTCF_17	-
-	chr6	30766388	GCCTCACTCTCCCGCCTCTCC	DHS_43	-	-
-	chr6	30766397	GCCCGCCTCTCCAAAACTCTA	DHS_43	-	-
-	chr6	30766398	GCCGCCTCTCCAAAACTCTAA	DHS_43	-	-
-	chr6	30766401	GCCTCTCCAAAACTCTAATCC	DHS_43	-	-
-	chr6	30766406	GCCAAAACTCTAATCCTTGAG	DHS_43	-	-
-	chr6	30766428	GCCTAATTTAGAACTCAGGTC	DHS_43	-	-
-	chr6	30766450	GCCTCCCCTGTAGCTTCTCGG	DHS_43	-	-
-	chr6	30766453	GCCCCTGTAGCTTCTCGGCCG	DHS_43	-	-
-	chr6	30766454	GCCCTGTAGCTTCTCGGCCGC	DHS_43	-	-
-	chr6	30766455	GCCTGTAGCTTCTCGGCCGCT	DHS_43	-	-
-	chr6	30766470	GCCGCTTTCAAGGTTCGAGTT	DHS_43	-	-
-	chr6	30766505	GCCCCTGTCATTTGTTTCCAA	DHS_43	-	-
-	chr6	30766506	GCCCTGTCATTTGTTTCCAAG	DHS_43	-	-
-	chr6	30766521	GCCAAGCCCCGCCCTCAATCC	DHS_43	-	-
-	chr6	30766526	GCCCCGCCCTCAATCCCTCTC	DHS_43	-	-
-	chr6	30766528	GCCGCCCTCAATCCCTCTCCT	DHS_43	-	-
-	chr6	30766531	GCCCTCAATCCCTCTCCTACG	DHS_43	-	-
-	chr6	30766532	GCCTCAATCCCTCTCCTACGG	DHS_43	-	-
-	chr6	30766539	GCCCTCTCCTACGGCTCCACC	DHS_43	-	-
-	chr6	30766540	GCCTCTCCTACGGCTCCACCT	DHS_43	-	-
-	chr6	30766545	GCCTACGGCTCCACCTTCCTC	DHS_43	-	-
-	chr6	30776287	GCCAGTCAGCAGGAACTCAGG	DHS_44	-	-
-	chr6	30776322	GCCCAACCCGTAGTGGAATGG	DHS_44	-	-
-	chr6	30776323	GCCAACCCGTAGTGGAATGGA	DHS_44	-	-
-	chr6	30776327	GCCCGTAGTGGAATGGAGCAA	DHS_44	-	-
-	chr6	30776357	GCCTGAGGGCATGTGATCACA	DHS_44	-	-
-	chr6	30793179	GCCCAGGCTGCTGAGATCAGT	DHS_45	CTCF_18	Promoter_10
-	chr6	30793180	GCCAGGCTGCTGAGATCAGTT	DHS_45	CTCF_18	Promoter_10
-	chr6	30793220	GCCGCCGTGCGCCAACAGAAT	DHS_45	CTCF_18	Promoter_10
-	chr6	30793223	GCCGTGCGCCAACAGAATAAT	DHS_45	CTCF_18	Promoter_10
-	chr6	30793230	GCCAACAGAATAATGCACGTC	DHS_45	CTCF_18	Promoter_10
-	chr6	30793262	GCCAAGGGACAACCCACTACC	DHS_45	CTCF_18	Promoter_10
-	chr6	30793273	GCCCACTACCGCTTGCCCGCC	DHS_45	CTCF_18	Promoter_10
-	chr6	30793274	GCCACTACCGCTTGCCCGCCC	DHS_45	CTCF_18	Promoter_10
-	chr6	30793280	GCCGCTTGCCCGCCCACCACC	DHS_45	CTCF_18	Promoter_10
-	chr6	30793288	GCCGCCCACCACCCACTTCCC	DHS_45	CTCF_18	Promoter_10
-	chr6	30793292	GCCACCACCCACTTCCCGCGC	DHS_45	CTCF_18	Promoter_10
-	chr6	30793295	GCCACCCACTTCCCGCGCAGT	DHS_45	CTCF_18	Promoter_10
-	chr6	30793298	GCCCACTTCCCGCGCAGTTCC	DHS_45	CTCF_18	Promoter_10
-	chr6	30793299	GCCACTTCCCGCGCAGTTCCA	DHS_45	CTCF_18	Promoter_10
-	chr6	30793305	GCCCGCGCAGTTCCAAACCGC	DHS_45	CTCF_18	Promoter_10
-	chr6	30793306	GCCGCGCAGTTCCAAACCGCG	DHS_45	CTCF_18	Promoter_10
-	chr6	30793316	GCCAAACCGCGACCAGAGAGT	DHS_45	CTCF_18	Promoter_10
-	chr6	30793321	GCCGCGACCAGAGAGTCTGGC	DHS_45	CTCF_18	Promoter_10
-	chr6	30793327	GCCAGAGAGTCTGGCGCCAGC	DHS_45	CTCF_18	Promoter_10
-	chr6	30795091	GCCGTCTTGAACCCACTCAAT	DHS_46	-	-
-	chr6	30795115	GCCCCCATCAATTACCCCTCT	DHS_46	-	-
-	chr6	30795116	GCCCCATCAATTACCCCTCTC	DHS_46	-	-
-	chr6	30795117	GCCCATCAATTACCCCTCTCT	DHS_46	-	-
-	chr6	30795128	GCCCCTCTCTCGTTTTTCAAT	DHS_46	-	-
-	chr6	30795129	GCCCTCTCTCGTTTTTCAATA	DHS_46	-	-
-	chr6	30795178	GCCACCTGGTCAGTGAAATCA	DHS_46	-	-
-	chr6	30795840	GCCAAACCGGTACCCACCCAT	DHS_47	Promoter_11	-
-	chr6	30795855	GCCCATTCGTCACTTCATTTT	DHS_47	Promoter_11	-
-	chr6	30795906	GCCCAAAGAGGACTGCGCTCG	DHS_47	Promoter_11	-
-	chr6	30795907	GCCAAAGAGGACTGCGCTCGT	DHS_47	Promoter_11	-
-	chr6	30795942	GCCAATGGACGCCTGGTACAT	DHS_47	Promoter_11	-
-	chr6	30795952	GCCTGGTACATGACCGGCATC	DHS_47	Promoter_11	-
-	chr6	30795964	GCCGGCATCGACTAATCAGGG	DHS_47	Promoter_11	-
-	chr6	30795984	GCCAGGCTCGATGAGGCTTTG	DHS_47	Promoter_11	-
-	chr6	30796007	GCCCTACCGCGCGCGGGGCCG	DHS_47	Promoter_11	-
-	chr6	30796008	GCCTACCGCGCGCGGGGCCGA	DHS_47	Promoter_11	-
-	chr6	30796669	GCCCATGTGCATCCCGCCCAA	DHS_48	-	-
-	chr6	30796670	GCCATGTGCATCCCGCCCAAC	DHS_48	-	-
-	chr6	30796680	GCCCGCCCAACCCCCCTGCGG	DHS_48	-	-
-	chr6	30796681	GCCGCCCAACCCCCCTGCGGG	DHS_48	-	-
-	chr6	30796684	GCCCAACCCCCCTGCGGGGTA	DHS_48	-	-
-	chr6	30796685	GCCAACCCCCCTGCGGGGTAC	DHS_48	-	-
-	chr6	30796689	GCCCCCCTGCGGGGTACTTAG	DHS_48	-	-
-	chr6	30796690	GCCCCCTGCGGGGTACTTAGG	DHS_48	-	-
-	chr6	30796691	GCCCCTGCGGGGTACTTAGGG	DHS_48	-	-
-	chr6	30796692	GCCCTGCGGGGTACTTAGGGC	DHS_48	-	-
-	chr6	30796693	GCCTGCGGGGTACTTAGGGCC	DHS_48	-	-
-	chr6	30796711	GCCAAACCGGAGCGGGAAGGG	DHS_48	-	-
-	chr6	30796716	GCCGGAGCGGGAAGGGGTGAG	DHS_48	-	-
-	chr6	30796760	GCCAGCGCAAGGGTGGGGGGC	DHS_48	-	-
-	chr6	30797196	GCCGTGGGCGCGCGGGGACAA	DHS_49	CTCF_19	-
-	chr6	30797226	GCCCGCCGGCAGGGGCGCGCT	DHS_49	CTCF_19	-
-	chr6	30797227	GCCGCCGGCAGGGGCGCGCTA	DHS_49	CTCF_19	-
-	chr6	30797254	GCCCCGCCCCTCGCGCGCGGA	DHS_49	CTCF_19	-
-	chr6	30797255	GCCCGCCCCTCGCGCGCGGAA	DHS_49	CTCF_19	-
-	chr6	30797256	GCCGCCCCTCGCGCGCGGAAT	DHS_49	CTCF_19	-
-	chr6	30797259	GCCCCTCGCGCGCGGAATTTT	DHS_49	CTCF_19	-
-	chr6	30797260	GCCCTCGCGCGCGGAATTTTT	DHS_49	CTCF_19	-
-	chr6	30797261	GCCTCGCGCGCGGAATTTTTG	DHS_49	CTCF_19	-
-	chr6	30797282	GCCCTGGCCCCGCCCACGCGC	DHS_49	CTCF_19	-
-	chr6	30797288	GCCCCGCCCACGCGCGAAGTC	DHS_49	CTCF_19	-
-	chr6	30798466	GCCATTTCTGGGCACGCCTTA	DHS_50	CTCF_20	-
-	chr6	30798481	GCCTTATCCCCTTTGGGTGAA	DHS_50	CTCF_20	-
-	chr6	30798487	GCCCCTTTGGGTGAATCTGTC	DHS_50	CTCF_20	-
-	chr6	30798526	GCCACCGTCGGGGCCAAAGAC	DHS_50	CTCF_20	-
-	chr6	30798529	GCCGTCGGGGCCAAAGACGTC	DHS_50	CTCF_20	-
-	chr6	30798538	GCCAAAGACGTCTGCTGCCAC	DHS_50	CTCF_20	-
-	chr6	30798554	GCCACCTGGTGGCGGGACCTG	DHS_50	CTCF_20	-
-	chr6	30798557	GCCTGGTGGCGGGACCTGGAA	DHS_50	CTCF_20	-
-	chr6	30798570	GCCTGGAATGACAAGTCTCTG	DHS_50	CTCF_20	-
-	chr6	30798603	GCCCATTTCCAGTATATCTAT	DHS_50	CTCF_20	-
-	chr6	30801873	GCCAGATGTACTGAACCATAA	DHS_52	-	-
-	chr6	30801887	GCCATAAATGGTTGAACTGGC	DHS_52	-	-
-	chr6	30801920	GCCCAGGATTCCTTTGGGTTA	DHS_52	-	-
-	chr6	30801921	GCCAGGATTCCTTTGGGTTAT	DHS_52	-	-
-	chr6	30806177	GCCAGACCTGGGGCAGCTTCT	DHS_53	-	-
-	chr6	30806182	GCCTGGGGCAGCTTCTCTAGC	DHS_53	-	-
-	chr6	30806209	GCCAGCTGAGCAGCCTCTTGG	DHS_53	-	-
-	chr6	30806221	GCCTCTTGGTACAGCTGGAAG	DHS_53	-	-
-	chr6	30806269	GCCTCGGCTCGGGCTCGGGCC	DHS_53	-	-
-	chr6	30806288	GCCCTATGGCAAAGGCCTCAG	DHS_53	-	-
-	chr6	30806289	GCCTATGGCAAAGGCCTCAGC	DHS_53	-	-
-	chr6	30806424	GCCTCTTAACTCACCCGCACA	DHS_54	-	-
-	chr6	30806436	GCCCGCACAGACGCGGCTTCT	DHS_54	-	-
-	chr6	30806460	GCCGCCTGCATAATTAGTTGG	DHS_54	-	-
-	chr6	30806482	GCCTGTGGACAGAAGGGAAGT	DHS_54	-	-
-	chr6	30806513	GCCCAGCAGCCCTTACTCCCA	DHS_54	-	-
-	chr6	30806522	GCCTTACTCCCAGGAGAAAGG	DHS_54	-	-
-	chr6	30806529	GCCCAGGAGAAAGGCCCAGTG	DHS_54	-	-
-	chr6	30806543	GCCAGTGCTGCAGAGGCAGAC	DHS_54	-	-
-	chr6	30806566	GCCTGAAACCTGAAATCCATA	DHS_54	-	-
-	chr6	30806681	GCCTCGGCTAGGCGCTCCAGC	DHS_55	CTCF_21	-
-	chr6	30806696	GCCAGCTTGTAGCGCTCCGCT	DHS_55	CTCF_21	-
-	chr6	30806711	GCCGCTTCCGCTGGCTTCCGC	DHS_55	CTCF_21	-
-	chr6	30806717	GCCGCTGGCTTCCGCACCCGG	DHS_55	CTCF_21	-
-	chr6	30806727	GCCGCACCCGGGCCTCCAGCT	DHS_55	CTCF_21	-
-	chr6	30806741	GCCAGCTCCTTCTCCCGCCGG	DHS_55	CTCF_21	-
-	chr6	30806747	GCCTTCTCCCGCCGGGCGATC	DHS_55	CTCF_21	-
-	chr6	30806754	GCCGCCGGGCGATCTCCTGCT	DHS_55	CTCF_21	-
-	chr6	30806757	GCCGGGCGATCTCCTGCTCCT	DHS_55	CTCF_21	-
-	chr6	30806813	GCCTGCACCCGCTGCTCCTCA	DHS_55	CTCF_21	-
-	chr6	30806820	GCCGCTGCTCCTCAATCTGCT	DHS_55	CTCF_21	-
-	chr6	30806828	GCCTCAATCTGCTGCTTAGTC	DHS_55	CTCF_21	-
-	chr6	30818550	GCCGCCCGCTGGCTCTCGGGC	DHS_56	Promoter_12	-
-	chr6	30818553	GCCCGCTGGCTCTCGGGCCCA	DHS_56	Promoter_12	-
-	chr6	30818554	GCCGCTGGCTCTCGGGCCCAG	DHS_56	Promoter_12	-
-	chr6	30818569	GCCCAGCCGGGCTGCCTGGTT	DHS_56	Promoter_12	-
-	chr6	30818570	GCCAGCCGGGCTGCCTGGTTA	DHS_56	Promoter_12	-
-	chr6	30818582	GCCTGGTTAGCCCGGGGAGGG	DHS_56	Promoter_12	-
-	chr6	30818591	GCCCGGGGAGGGCCACATCCC	DHS_56	Promoter_12	-
-	chr6	30818592	GCCGGGGAGGGCCACATCCCT	DHS_56	Promoter_12	-
-	chr6	30818609	GCCTGCCGCCCCAGTCACCGC	DHS_56	Promoter_12	-
-	chr6	30818613	GCCGCCCCAGTCACCGCCCTT	DHS_56	Promoter_12	-
-	chr6	30818618	GCCAGTCACCGCCCTTCTTGA	DHS_56	Promoter_12	-
-	chr6	30818625	GCCGCCCTTCTTGAGCCGGGA	DHS_56	Promoter_12	-
-	chr6	30818628	GCCCTTCTTGAGCCGGGAATC	DHS_56	Promoter_12	-
-	chr6	30818629	GCCTTCTTGAGCCGGGAATCC	DHS_56	Promoter_12	-
-	chr6	30818639	GCCGGGAATCCCGCCCACGCC	DHS_56	Promoter_12	-
-	chr6	30818647	GCCCGCCCACGCCGCGCCACG	DHS_56	Promoter_12	-
-	chr6	30818648	GCCGCCCACGCCGCGCCACGC	DHS_56	Promoter_12	-
-	chr6	30818669	GCCGCCCCCGGGTGAGGGACT	DHS_56	Promoter_12	-
-	chr6	30818672	GCCCCCGGGTGAGGGACTTGA	DHS_56	Promoter_12	-
-	chr6	30818673	GCCCCGGGTGAGGGACTTGAC	DHS_56	Promoter_12	-
-	chr6	30818674	GCCCGGGTGAGGGACTTGACC	DHS_56	Promoter_12	-
-	chr6	30818675	GCCGGGTGAGGGACTTGACCT	DHS_56	Promoter_12	-
-	chr6	30818692	GCCTCCGCCTGGCACCCTGGC	DHS_56	Promoter_12	-
-	chr6	30818698	GCCTGGCACCCTGGCGTAAGG	DHS_56	Promoter_12	-
-	chr6	30818705	GCCCTGGCGTAAGGGTGATTG	DHS_56	Promoter_12	-
-	chr6	30818706	GCCTGGCGTAAGGGTGATTGC	DHS_56	Promoter_12	-
-	chr6	30820315	GCCGGCAGAGGTAATTTATGT	DHS_57	CTCF_22	Promoter_13
-	chr6	30820338	GCCTGAAAATTGGGCGGGTCC	DHS_57	CTCF_22	Promoter_13
-	chr6	30820366	GCCTCCTCCCGCAGCTGGGGA	DHS_57	CTCF_22	Promoter_13
-	chr6	30820369	GCCTCCCGCAGCTGGGGAGCG	DHS_57	CTCF_22	Promoter_13
-	chr6	30820372	GCCCGCAGCTGGGGAGCGGTT	DHS_57	CTCF_22	Promoter_13
-	chr6	30820373	GCCGCAGCTGGGGAGCGGTTG	DHS_57	CTCF_22	Promoter_13
-	chr6	30820413	GCCGACGATTAAACAAAGGGA	DHS_57	CTCF_22	Promoter_13
-	chr6	30820459	GCCTAGGCGCCCAACTGCACG	DHS_57	CTCF_22	Promoter_13
-	chr6	30820467	GCCCAACTGCACGTTGTGAGT	DHS_57	CTCF_22	Promoter_13
-	chr6	30822451	GCCACCGTGCAGAATTTAACA	CTCF_23	-	-
-	chr6	30822486	GCCTGTTTCAGGCGCCCTCTG	CTCF_23	-	-
-	chr6	30822499	GCCCTCTGTTGAGGGTACTAC	CTCF_23	-	-
-	chr6	30822500	GCCTCTGTTGAGGGTACTACT	CTCF_23	-	-
-	chr6	30822559	GCCATGCAGCTGCCTGAGGAA	CTCF_23	-	-
-	chr6	30822570	GCCTGAGGAAAGCCAGATAAA	CTCF_23	-	-
-	chr6	30822581	GCCAGATAAAGCTGATACTCC	CTCF_23	-	-
-	chr6	30822603	GCCATGAGGGCCTTACCCTCC	CTCF_23	-	-
-	chr6	30822617	GCCCTCCGGCATGAGGAGGGA	CTCF_23	-	-
-	chr6	30822618	GCCTCCGGCATGAGGAGGGAA	CTCF_23	-	-
-	chr6	30822644	GCCAGGAGAGCTCTCTATCTG	CTCF_23	-	-
-	chr6	30822716	GCCTGAAGGAAAGGCAAGCTT	CTCF_23	-	-
-	chr6	30835371	GCCCCATGATGAATGTCAAAC	DHS_58	-	-
-	chr6	30835372	GCCCATGATGAATGTCAAACA	DHS_58	-	-
-	chr6	30835373	GCCATGATGAATGTCAAACAA	DHS_58	-	-
-	chr6	30835491	GCCAGCAGGAATGTGGGGTAG	DHS_58	-	-
-	chr6	30839829	GCCAGGGAGGCTTAGAGCCCT	enhancer_6	-	-
-	chr6	30839846	GCCTGTTGCTTCCTGCAGGCA	enhancer_6	-	-
-	chr6	30839926	GCCAGGTGGGATTCGAGAACA	enhancer_6	-	-
-	chr6	30845438	GCCCCAGCCTCACCTCCACGG	DHS_59	enhancer_7	-
-	chr6	30845449	GCCTCCACGGGCCCTGATGCA	DHS_59	enhancer_7	-
-	chr6	30845452	GCCACGGGCCCTGATGCACTG	DHS_59	enhancer_7	-
-	chr6	30845459	GCCCTGATGCACTGGCTTCGG	DHS_59	enhancer_7	-
-	chr6	30845460	GCCTGATGCACTGGCTTCGGC	DHS_59	enhancer_7	-
-	chr6	30845518	GCCCCACTGATGGGCCTCCTG	DHS_59	enhancer_7	-
-	chr6	30845534	GCCTGCCCTCCCCCATGCAGG	DHS_59	enhancer_7	-
-	chr6	30845538	GCCCTCCCCCATGCAGGACTT	DHS_59	enhancer_7	-
-	chr6	30845539	GCCTCCCCCATGCAGGACTTA	DHS_59	enhancer_7	-
-	chr6	30845542	GCCCCCATGCAGGACTTAGTC	DHS_59	enhancer_7	-
-	chr6	30845543	GCCCCATGCAGGACTTAGTCA	DHS_59	enhancer_7	-
-	chr6	30845544	GCCCATGCAGGACTTAGTCAC	DHS_59	enhancer_7	-
-	chr6	30845595	GCCCTCCTCCAGACACCCATG	DHS_59	enhancer_7	-
-	chr6	30845596	GCCTCCTCCAGACACCCATGC	DHS_59	enhancer_7	-
-	chr6	30845599	GCCTCCAGACACCCATGCTCC	DHS_59	enhancer_7	-
-	chr6	30845610	GCCATGCTCCCCACATCCTTT	DHS_59	enhancer_7	-
-	chr6	30845656	GCCCCCCAACCCCCATGATTA	DHS_59	enhancer_7	-
-	chr6	30845657	GCCCCCAACCCCCATGATTAA	DHS_59	enhancer_7	-
-	chr6	30845665	GCCCCATGATTAAAATAGTAC	DHS_59	enhancer_7	-
-	chr6	30857773	GCCGCCATCTGGACCAGGTGA	DHS_60	-	-
-	chr6	30857785	GCCAGGTGACGTCAGCTATCT	DHS_60	-	-
-	chr6	30857814	GCCAGCATTCCCCGGCCCAGG	DHS_60	-	-
-	chr6	30857822	GCCCCGGCCCAGGAAACAGAC	DHS_60	-	-
-	chr6	30857823	GCCCGGCCCAGGAAACAGACT	DHS_60	-	-
-	chr6	30857824	GCCGGCCCAGGAAACAGACTT	DHS_60	-	-
-	chr6	30857828	GCCCAGGAAACAGACTTCCGG	DHS_60	-	-
-	chr6	30857844	GCCGGCTGTCTGGGCTCTGAG	DHS_60	-	-
-	chr6	30857874	GCCTCCTGGGTGAGTGGGTCT	DHS_60	-	-
-	chr6	30857877	GCCTGGGTGAGTGGGTCTTGC	DHS_60	-	-
-	chr6	30866479	GCCTGGCTCCCTCCCATGGCA	DHS_61	CTCF_24	-
-	chr6	30866487	GCCTCCCATGGCAACTCCCTG	DHS_61	CTCF_24	-
-	chr6	30866490	GCCCATGGCAACTCCCTGAGT	DHS_61	CTCF_24	-
-	chr6	30866491	GCCATGGCAACTCCCTGAGTC	DHS_61	CTCF_24	-
-	chr6	30866502	GCCCTGAGTCTGAGTAGAGAA	DHS_61	CTCF_24	-
-	chr6	30866503	GCCTGAGTCTGAGTAGAGAAG	DHS_61	CTCF_24	-
-	chr6	30866544	GCCACCCCTCCTGTGAAAGGC	DHS_61	CTCF_24	-
-	chr6	30866548	GCCCTCCTGTGAAAGGCTCCC	DHS_61	CTCF_24	-
-	chr6	30866549	GCCTCCTGTGAAAGGCTCCCT	DHS_61	CTCF_24	-
-	chr6	30866565	GCCCTTCTGAGTTCCAGGTCC	DHS_61	CTCF_24	-
-	chr6	30866584	GCCTATCTGATGACCCACCTC	DHS_61	CTCF_24	-
-	chr6	30866597	GCCACCTCACCTATGCCTGCC	DHS_61	CTCF_24	-
-	chr6	30866600	GCCTCACCTATGCCTGCCTAA	DHS_61	CTCF_24	-
-	chr6	30866605	GCCTATGCCTGCCTAATACCT	DHS_61	CTCF_24	-
-	chr6	30886551	GCCTAGAAGCAAAGAACTCGC	DHS_62	enhancer_8	-
-	chr6	30886570	GCCTGTCATATGTAGATCAAC	DHS_62	enhancer_8	-
-	chr6	30886589	GCCAAGCTAGACCCCATCCTC	DHS_62	enhancer_8	-
-	chr6	30886616	GCCACCTTCATCAGGCTCTGC	DHS_62	enhancer_8	-
-	chr6	30886619	GCCTTCATCAGGCTCTGCCAC	DHS_62	enhancer_8	-
-	chr6	30886635	GCCACTCCTAGCTGCAATTCC	DHS_62	enhancer_8	-
-	chr6	30886640	GCCTAGCTGCAATTCCCCTAG	DHS_62	enhancer_8	-
-	chr6	30886653	GCCCCTAGTCAGCCCAGGACC	DHS_62	enhancer_8	-
-	chr6	30886664	GCCCAGGACCAGTACTAGAGA	DHS_62	enhancer_8	-
-	chr6	30886665	GCCAGGACCAGTACTAGAGAG	DHS_62	enhancer_8	-
-	chr6	30886671	GCCAGTACTAGAGAGCTAGGG	DHS_62	enhancer_8	-
-	chr6	30890097	GCCTTCAACCATGGAAACTTG	DHS_63	-	-
-	chr6	30890188	GCCACATGACTGGGTAATGAG	DHS_63	-	-
-	chr6	30897878	GCCACCAGATGGCATAACTGG	CTCF_25	-	-
-	chr6	30897881	GCCAGATGGCATAACTGGGCT	CTCF_25	-	-
-	chr6	30897979	GCCCCTGAGAAAGCTCATTTC	CTCF_25	-	-
-	chr6	30897981	GCCTGAGAAAGCTCATTTCTA	CTCF_25	-	-
-	chr6	30898043	GCCCATCTTTGGAATTTTAAG	CTCF_25	-	-
-	chr6	30898044	GCCATCTTTGGAATTTTAAGG	CTCF_25	-	-
-	chr6	30902893	GCCTGCCCTGGGATAACCCTG	DHS_64	-	-
-	chr6	30902897	GCCCTGGGATAACCCTGGGAA	DHS_64	-	-
-	chr6	30902898	GCCTGGGATAACCCTGGGAAT	DHS_64	-	-
-	chr6	30902932	GCCCATGGCTGTGGGTGGCTC	DHS_64	-	-
-	chr6	30902933	GCCATGGCTGTGGGTGGCTCA	DHS_64	-	-
-	chr6	30902959	GCCCAGGTGTGGTGCCGTTTG	DHS_64	-	-
-	chr6	30902960	GCCAGGTGTGGTGCCGTTTGG	DHS_64	-	-
-	chr6	30902972	GCCGTTTGGTAACCACGGGCC	DHS_64	-	-
-	chr6	30902993	GCCCTAGGCCACAGTCCCAGG	DHS_64	-	-
-	chr6	30903000	GCCACAGTCCCAGGCGAAGTT	DHS_64	-	-
-	chr6	30903007	GCCCAGGCGAAGTTAGTAGCA	DHS_64	-	-
-	chr6	30904394	GCCATGGGGGAACCTCTGGCA	DHS_65	CTCF_26	enhancer_9
-	chr6	30904416	GCCCACCAGGGGGAGCCCTTT	DHS_65	CTCF_26	enhancer_9
-	chr6	30904417	GCCACCAGGGGGAGCCCTTTC	DHS_65	CTCF_26	enhancer_9
-	chr6	30904420	GCCAGGGGGAGCCCTTTCCCC	DHS_65	CTCF_26	enhancer_9
-	chr6	30904430	GCCCTTTCCCCATCTTGGGGC	DHS_65	CTCF_26	enhancer_9
-	chr6	30904431	GCCTTTCCCCATCTTGGGGCT	DHS_65	CTCF_26	enhancer_9
-	chr6	30904437	GCCCATCTTGGGGCTGTGGAT	DHS_65	CTCF_26	enhancer_9
-	chr6	30904438	GCCATCTTGGGGCTGTGGATC	DHS_65	CTCF_26	enhancer_9
-	chr6	30904686	GCCAAATGCAGTCATTTAGCA	DHS_65	CTCF_26	enhancer_9
-	chr6	30904710	GCCTCTTTCAGAGTCCTGTAT	DHS_65	CTCF_26	enhancer_9
-	chr6	30904730	GCCCAGCGATGGGGATCAAGA	DHS_65	CTCF_26	enhancer_9
-	chr6	30904731	GCCAGCGATGGGGATCAAGAT	DHS_65	CTCF_26	enhancer_9
-	chr6	30914235	GCCGGCCACCCAGCAGGCTGC	DHS_67	-	-
-	chr6	30914242	GCCCAGCAGGCTGCCTATTGT	DHS_67	-	-
-	chr6	30914243	GCCAGCAGGCTGCCTATTGTG	DHS_67	-	-
-	chr6	30914254	GCCTATTGTGCTGTTTGAGAT	DHS_67	-	-
-	chr6	30919923	GCCTACTGCACTTCTTCCTTA	DHS_68	CTCF_28	enhancer_10
-	chr6	30920004	GCCCTCCCTGGAATGTAGGGA	DHS_68	CTCF_28	enhancer_10
-	chr6	30920005	GCCTCCCTGGAATGTAGGGAA	DHS_68	CTCF_28	enhancer_10
-	chr6	30920009	GCCTGGAATGTAGGGAATTTG	DHS_68	CTCF_28	enhancer_10
-	chr6	30920070	GCCTTGCAGCAGCACAGCTGG	DHS_68	CTCF_28	enhancer_10
-	chr6	30920104	GCCATCTCTGAAAGAGAGGGG	DHS_68	CTCF_28	enhancer_10
-	chr6	30920150	GCCGGTCTTAGTGAAGGGTCC	DHS_68	CTCF_28	enhancer_10
-	chr6	30920168	GCCCCGAGGCACTAGCGTGTC	DHS_68	CTCF_28	enhancer_10
-	chr6	30920169	GCCCGAGGCACTAGCGTGTCC	DHS_68	CTCF_28	enhancer_10
-	chr6	30920170	GCCGAGGCACTAGCGTGTCCT	DHS_68	CTCF_28	enhancer_10
-	chr6	30923411	GCCAGGTAAATCTGCCCTCCC	DHS_70	-	-
-	chr6	30923950	GCCACCGAATTGAACGCAATC	DHS_71	-	-
-	chr6	30923953	GCCGAATTGAACGCAATCTCT	DHS_71	-	-
-	chr6	30923976	GCCTCCCACCCTCCGTCGAGG	DHS_71	-	-
-	chr6	30923979	GCCCACCCTCCGTCGAGGTTG	DHS_71	-	-
-	chr6	30923980	GCCACCCTCCGTCGAGGTTGG	DHS_71	-	-
-	chr6	30923983	GCCCTCCGTCGAGGTTGGGCT	DHS_71	-	-
-	chr6	30923984	GCCTCCGTCGAGGTTGGGCTG	DHS_71	-	-
-	chr6	30923987	GCCGTCGAGGTTGGGCTGGCT	DHS_71	-	-
-	chr6	30924013	GCCCAATCCTTTTATTATGTG	DHS_71	-	-
-	chr6	30924046	GCCAACCTCCCATCGTGAGTT	DHS_71	-	-
-	chr6	30924050	GCCTCCCATCGTGAGTTCTCT	DHS_71	-	-
-	chr6	30924054	GCCATCGTGAGTTCTCTCTTA	DHS_71	-	-
-	chr6	30925262	GCCCTATAGTAAAGACAATGG	enhancer_11	-	-
-	chr6	30925263	GCCTATAGTAAAGACAATGGT	enhancer_11	-	-
-	chr6	30925346	GCCGTGAGTATATAATGAGTC	enhancer_11	-	-
-	chr6	30952080	GCCAAGACAATTAAAGCTATA	enhancer_12	-	-
-	chr6	30952137	GCCAGGATCAGTTACAAATGA	enhancer_12	-	-
-	chr6	30952259	GCCTCAGTTTGAGAACACTAT	enhancer_12	-	-
-	chr6	30952279	GCCTAGCACTGACCTTGACTT	enhancer_12	-	-
-	chr6	30952290	GCCTTGACTTCCAGGGTGACC	enhancer_12	-	-
-	chr6	30953558	GCCCTGCCCAAGCCTGAATCT	DHS_72	CTCF_29	enhancer_13
-	chr6	30953569	GCCTGAATCTCTTTCCTGGCC	DHS_72	CTCF_29	enhancer_13
-	chr6	30953582	GCCTGGCCGCTTTCACTTTCC	DHS_72	CTCF_29	enhancer_13
-	chr6	30953587	GCCGCTTTCACTTTCCTTCCA	DHS_72	CTCF_29	enhancer_13
-	chr6	30953600	GCCTTCCATTTTCCAGTAATT	DHS_72	CTCF_29	enhancer_13
-	chr6	30953604	GCCATTTTCCAGTAATTGGAG	DHS_72	CTCF_29	enhancer_13
-	chr6	30953611	GCCAGTAATTGGAGTTGGTCA	DHS_72	CTCF_29	enhancer_13
-	chr6	30953646	GCCCCCAAGTGGCCTTCCTGT	DHS_72	CTCF_29	enhancer_13
-	chr6	30953647	GCCCCAAGTGGCCTTCCTGTT	DHS_72	CTCF_29	enhancer_13
-	chr6	30953648	GCCCAAGTGGCCTTCCTGTTC	DHS_72	CTCF_29	enhancer_13
-	chr6	30953649	GCCAAGTGGCCTTCCTGTTCA	DHS_72	CTCF_29	enhancer_13
-	chr6	30953657	GCCTTCCTGTTCACTGTCCGG	DHS_72	CTCF_29	enhancer_13
-	chr6	30953661	GCCTGTTCACTGTCCGGACCA	DHS_72	CTCF_29	enhancer_13
-	chr6	30953678	GCCATAAGGCCTAAAGAATAC	DHS_72	CTCF_29	enhancer_13
-	chr6	30953686	GCCTAAAGAATACTCCGATAA	DHS_72	CTCF_29	enhancer_13
-	chr6	30955155	GCCTGGTGCCCTATGCAAACT	enhancer_14	-	-
-	chr6	30955162	GCCCTATGCAAACTCTTATTT	enhancer_14	-	-
-	chr6	30956603	GCCCTTTGGTTCTGTTTCACA	DHS_73	-	-
-	chr6	30956604	GCCTTTGGTTCTGTTTCACAG	DHS_73	-	-
-	chr6	30956647	GCCACAGCCAGGCTGCTCAGT	DHS_73	-	-
-	chr6	30956668	GCCTCTCTGCGGGGGCCTAGA	DHS_73	-	-
-	chr6	30956682	GCCTAGAGGCTCGGTGAGGGG	DHS_73	-	-
-	chr6	30956717	GCCATGGTCACATTGAAGCCA	DHS_73	-	-
-	chr6	30957718	GCCTCAGTTTCCAGTTTATTC	DHS_74	-	-
-	chr6	30957761	GCCCAAAGCCTTGTACACTCC	DHS_74	-	-
-	chr6	30957762	GCCAAAGCCTTGTACACTCCT	DHS_74	-	-
-	chr6	30957768	GCCTTGTACACTCCTTCACCC	DHS_74	-	-
-	chr6	30957785	GCCCTGCCCCCCACCCGTCGC	DHS_74	-	-
-	chr6	30957786	GCCTGCCCCCCACCCGTCGCT	DHS_74	-	-
-	chr6	30957790	GCCCCCCACCCGTCGCTTCTT	DHS_74	-	-
-	chr6	30957791	GCCCCCACCCGTCGCTTCTTA	DHS_74	-	-
-	chr6	30957792	GCCCCACCCGTCGCTTCTTAC	DHS_74	-	-
-	chr6	30957793	GCCCACCCGTCGCTTCTTACT	DHS_74	-	-
-	chr6	30957794	GCCACCCGTCGCTTCTTACTC	DHS_74	-	-
-	chr6	30957797	GCCCGTCGCTTCTTACTCTCC	DHS_74	-	-
-	chr6	30957860	GCCCGGAAGGGGACTGCAGCT	DHS_74	-	-
-	chr6	30957861	GCCGGAAGGGGACTGCAGCTA	DHS_74	-	-
-	chr6	30958279	GCCGAGTCCCGCATTCCAGCT	DHS_75	-	-
-	chr6	30958285	GCCCGCATTCCAGCTGGCTCC	DHS_75	-	-
-	chr6	30958286	GCCGCATTCCAGCTGGCTCCA	DHS_75	-	-
-	chr6	30958293	GCCAGCTGGCTCCAGCTCCCT	DHS_75	-	-
-	chr6	30958303	GCCAGCTCCCTTTCCGTTGTC	DHS_75	-	-
-	chr6	30958309	GCCCTTTCCGTTGTCACTTGA	DHS_75	-	-
-	chr6	30958310	GCCTTTCCGTTGTCACTTGAC	DHS_75	-	-
-	chr6	30958331	GCCACTGGGCCCCAGCCTTGC	DHS_75	-	-
-	chr6	30958340	GCCCAGCCTTGCATCCCTCCC	DHS_75	-	-
-	chr6	30958357	GCCCACTCCTCCAGCCTAGAG	DHS_75	-	-
-	chr6	30958363	GCCTCCAGCCTAGAGCTGGGG	DHS_75	-	-
-	chr6	30958370	GCCTAGAGCTGGGGCGAGGTG	DHS_75	-	-
-	chr6	30958397	GCCACTAGGAATTTCTCCTGA	DHS_75	-	-
-	chr6	30958573	GCCTGGCAGGCCTGTTGGGGC	DHS_76	Promoter_14	-
-	chr6	30958582	GCCTGTTGGGGCTTTCCCAGA	DHS_76	Promoter_14	-
-	chr6	30958597	GCCAGAGCACAGCTCCTGGAA	DHS_76	Promoter_14	-
-	chr6	30958685	GCCCCAGTCCAGCGTCTCCTG	DHS_76	Promoter_14	-
-	chr6	30959567	GCCCGCCTTCAGGGTCTGGGG	DHS_77	Promoter_15	-
-	chr6	30959568	GCCGCCTTCAGGGTCTGGGGC	DHS_77	Promoter_15	-
-	chr6	30959571	GCCTTCAGGGTCTGGGGCCTT	DHS_77	Promoter_15	-
-	chr6	30959690	GCCCTGAGACCTGAGCTCTGC	DHS_77	Promoter_15	-
-	chr6	30959691	GCCTGAGACCTGAGCTCTGCT	DHS_77	Promoter_15	-
-	chr6	30959711	GCCCTTCTCTGGGCTAACTCC	DHS_77	Promoter_15	-
-	chr6	30959712	GCCTTCTCTGGGCTAACTCCC	DHS_77	Promoter_15	-
-	chr6	30960158	GCCCGAACGCGCGGCGAGAAG	DHS_78	Promoter_16	-
-	chr6	30960159	GCCGAACGCGCGGCGAGAAGG	DHS_78	Promoter_16	-
-	chr6	30960226	GCCGAGGCGAGGGGGAGGCGG	DHS_78	Promoter_16	-
-	chr6	30960248	GCCTGGGCCCGAGCCGCCCCA	DHS_78	Promoter_16	-
-	chr6	30960269	GCCCTGGCTCCTCTCCCCGGA	DHS_78	Promoter_16	-
-	chr6	30960282	GCCCCGGAACAGGCCCCCGAC	DHS_78	Promoter_16	-
-	chr6	30960283	GCCCGGAACAGGCCCCCGACA	DHS_78	Promoter_16	-
-	chr6	30960284	GCCGGAACAGGCCCCCGACAG	DHS_78	Promoter_16	-
-	chr6	30960295	GCCCCGACAGCTGCTCTCGGG	DHS_78	Promoter_16	-
-	chr6	30960296	GCCCGACAGCTGCTCTCGGGA	DHS_78	Promoter_16	-
-	chr6	30960297	GCCGACAGCTGCTCTCGGGAG	DHS_78	Promoter_16	-
-	chr6	30960320	GCCTCCCGACACCCGAGCCCC	DHS_78	Promoter_16	-
-	chr6	30960324	GCCGACACCCGAGCCCCGCCG	DHS_78	Promoter_16	-
-	chr6	30960568	GCCCGAGCCATGCTTGGTCGT	DHS_79	-	-
-	chr6	30960574	GCCATGCTTGGTCGTCCAGCT	DHS_79	-	-
-	chr6	30960605	GCCCTGCCCGCCTCCCCGATG	DHS_79	-	-
-	chr6	30960606	GCCTGCCCGCCTCCCCGATGC	DHS_79	-	-
-	chr6	30960610	GCCCGCCTCCCCGATGCTCTG	DHS_79	-	-
-	chr6	30960611	GCCGCCTCCCCGATGCTCTGG	DHS_79	-	-
-	chr6	30960614	GCCTCCCCGATGCTCTGGCAT	DHS_79	-	-
-	chr6	30960617	GCCCCGATGCTCTGGCATACC	DHS_79	-	-
-	chr6	30960618	GCCCGATGCTCTGGCATACCG	DHS_79	-	-
-	chr6	30960619	GCCGATGCTCTGGCATACCGT	DHS_79	-	-
-	chr6	30960675	GCCCGTGACCTCCCAGAAAGA	DHS_79	-	-
-	chr6	30960676	GCCGTGACCTCCCAGAAAGAG	DHS_79	-	-
-	chr6	30960682	GCCTCCCAGAAAGAGTTTTGA	DHS_79	-	-
-	chr6	30960706	GCCAGCCTTGAGGCAAGTCCC	DHS_79	-	-
-	chr6	30960710	GCCTTGAGGCAAGTCCCCTCT	DHS_79	-	-
-	chr6	30960724	GCCCTCTCACTCAGTGCGGAG	DHS_79	-	-
-	chr6	30960725	GCCTCTCACTCAGTGCGGAGG	DHS_79	-	-
-	chr6	30961939	GCCTGCCTCGTATCCTCTGCC	DHS_80	enhancer_15	-
-	chr6	30961961	GCCTTTGTATCTCTGCCCCGG	DHS_80	enhancer_15	-
-	chr6	30961975	GCCCCGGGCTCCTCTCGGCTC	DHS_80	enhancer_15	-
-	chr6	30961977	GCCGGGCTCCTCTCGGCTCTG	DHS_80	enhancer_15	-
-	chr6	30962063	GCCCGAGAGAGGTGGGGTTGG	DHS_80	enhancer_15	-
-	chr6	30962093	GCCAGGAATTCCAAGCCAGTC	DHS_80	enhancer_15	-
-	chr6	30962102	GCCAAGCCAGTCTCCTGGGAC	DHS_80	enhancer_15	-
-	chr6	30962114	GCCTGGGACTCTGGCAGCCTG	DHS_80	enhancer_15	-
-	chr6	30962136	GCCCCGGCGCTGGACCCTAAG	DHS_80	enhancer_15	-
-	chr6	30962137	GCCCGGCGCTGGACCCTAAGG	DHS_80	enhancer_15	-
-	chr6	30962138	GCCGGCGCTGGACCCTAAGGG	DHS_80	enhancer_15	-
-	chr6	30962159	GCCAGGCGTGATGCCTTCTGG	DHS_80	enhancer_15	-
-	chr6	30962185	GCCTCTGAGTGCCCCCCACAA	DHS_80	enhancer_15	-
-	chr6	30962195	GCCCCCCACAACTCAGTCGTC	DHS_80	enhancer_15	-
-	chr6	30962196	GCCCCCACAACTCAGTCGTCC	DHS_80	enhancer_15	-
-	chr6	30962197	GCCCCACAACTCAGTCGTCCC	DHS_80	enhancer_15	-
-	chr6	30962198	GCCCACAACTCAGTCGTCCCC	DHS_80	enhancer_15	-
-	chr6	30962199	GCCACAACTCAGTCGTCCCCC	DHS_80	enhancer_15	-
-	chr6	30962254	GCCTCTTACATTCCTGCCCTA	DHS_80	enhancer_15	-
-	chr6	30962329	GCCTCCTACCTCCTGGGGTGA	DHS_80	enhancer_15	-
-	chr6	30962332	GCCTACCTCCTGGGGTGACCT	DHS_80	enhancer_15	-
-	chr6	30962336	GCCTCCTGGGGTGACCTGCCT	DHS_80	enhancer_15	-
-	chr6	30962349	GCCTGCCTTCCTTGTCTTTAG	DHS_80	enhancer_15	-
-	chr6	30962353	GCCTTCCTTGTCTTTAGACCC	DHS_80	enhancer_15	-
-	chr6	30962357	GCCTTGTCTTTAGACCCGCCC	DHS_80	enhancer_15	-
-	chr6	30962371	GCCGCCCTCGTCTCCAAGGCA	DHS_80	enhancer_15	-
-	chr6	30962375	GCCTCGTCTCCAAGGCAACTC	DHS_80	enhancer_15	-
-	chr6	30962383	GCCAAGGCAACTCAGCCTTTC	DHS_80	enhancer_15	-
-	chr6	30968767	GCCCTTGGGTCTCCTCCTCAT	DHS_81	CTCF_30	Promoter_17
-	chr6	30968768	GCCTTGGGTCTCCTCCTCATT	DHS_81	CTCF_30	Promoter_17
-	chr6	30968811	GCCTTCTCCCCAGATGTGGTG	DHS_81	CTCF_30	Promoter_17
-	chr6	30968817	GCCCCAGATGTGGTGAACAAT	DHS_81	CTCF_30	Promoter_17
-	chr6	30968818	GCCCAGATGTGGTGAACAATT	DHS_81	CTCF_30	Promoter_17
-	chr6	30968819	GCCAGATGTGGTGAACAATTC	DHS_81	CTCF_30	Promoter_17
-	chr6	30968843	GCCGGCACTGGGAGGCACCTT	DHS_81	CTCF_30	Promoter_17
-	chr6	30968863	GCCCGCCAGCCCCCTGGTGGC	DHS_81	CTCF_30	Promoter_17
-	chr6	30968874	GCCTGGTGGCCGCCTGGCCCA	DHS_81	CTCF_30	Promoter_17
-	chr6	30968882	GCCGCCTGGCCCACCTCCCAC	DHS_81	CTCF_30	Promoter_17
-	chr6	30968885	GCCTGGCCCACCTCCCACCAA	DHS_81	CTCF_30	Promoter_17
-	chr6	30983720	GCCGTTAGCAGCGTGGGCGGA	DHS_82	Promoter_18	-
-	chr6	30983750	GCCTTCGCGGAACCAACTGGT	DHS_82	Promoter_18	-
-	chr6	30983761	GCCAACTGGTCCAGCTTCTGG	DHS_82	Promoter_18	-
-	chr6	30983770	GCCAGCTTCTGGTGTCTCCCC	DHS_82	Promoter_18	-
-	chr6	30983787	GCCCTCGCTCAATTAAAAGCC	DHS_82	Promoter_18	-
-	chr6	30983788	GCCTCGCTCAATTAAAAGCCA	DHS_82	Promoter_18	-
-	chr6	30983805	GCCAGCTCCTCTCCTTTCGGC	DHS_82	Promoter_18	-
-	chr6	30983811	GCCTCTCCTTTCGGCTTCCCC	DHS_82	Promoter_18	-
-	chr6	30983816	GCCTTTCGGCTTCCCCACGGT	DHS_82	Promoter_18	-
-	chr6	30983827	GCCCCACGGTGCCTTTCGGGA	DHS_82	Promoter_18	-
-	chr6	30983828	GCCCACGGTGCCTTTCGGGAT	DHS_82	Promoter_18	-
-	chr6	30983829	GCCACGGTGCCTTTCGGGATT	DHS_82	Promoter_18	-
-	chr6	30983837	GCCTTTCGGGATTTGTAGTCA	DHS_82	Promoter_18	-
-	chr6	30983869	GCCGGCTCTAAGGAGAGCAAA	DHS_82	Promoter_18	-
-	chr6	30989617	GCCCACGCGCGGGAGCTGGGC	DHS_83	Promoter_19	-
-	chr6	30989618	GCCACGCGCGGGAGCTGGGCG	DHS_83	Promoter_19	-
-	chr6	30989680	GCCCCGGCCGGGCACAGCGAC	DHS_83	Promoter_19	-
-	chr6	30989681	GCCCGGCCGGGCACAGCGACG	DHS_83	Promoter_19	-
-	chr6	30989682	GCCGGCCGGGCACAGCGACGT	DHS_83	Promoter_19	-
-	chr6	30989686	GCCGGGCACAGCGACGTCAAG	DHS_83	Promoter_19	-
-	chr6	30989734	GCCTGAGAGCGCGGGACTTGG	DHS_83	Promoter_19	-
-	chr6	30989881	GCCCGTGGGGTTTGCCTTCGC	DHS_84	Promoter_20	-
-	chr6	30989882	GCCGTGGGGTTTGCCTTCGCG	DHS_84	Promoter_20	-
-	chr6	30989894	GCCTTCGCGGCGGACTCGCTC	DHS_84	Promoter_20	-
-	chr6	30989913	GCCTCTGGTCTACAGCCTTTG	DHS_84	Promoter_20	-
-	chr6	30989935	GCCGGTAGGGAGAGGGTGGGG	DHS_84	Promoter_20	-
-	chr6	30989955	GCCAAAGCCAGCTGCTGCGCA	DHS_84	Promoter_20	-
-	chr6	30989979	GCCGGCCGGGGCCCCGCCCCC	DHS_84	Promoter_20	-
-	chr6	30989990	GCCCGCCCCCATGCGCCGCGC	DHS_84	Promoter_20	-
-	chr6	30989991	GCCGCCCCCATGCGCCGCGCG	DHS_84	Promoter_20	-
-	chr6	30989994	GCCCCCATGCGCCGCGCGGCT	DHS_84	Promoter_20	-
-	chr6	30990004	GCCGCGCGGCTCCAGGGCCAC	DHS_84	Promoter_20	-
-	chr6	30990027	GCCAGGGTCGGGTTTGGTGGA	DHS_84	Promoter_20	-
-	chr6	30991355	GCCCCCTGGCCAATTCCCTCC	DHS_85	CTCF_31	enhancer_16
-	chr6	30991385	GCCTCTTATTTGCAGGACAGT	DHS_85	CTCF_31	enhancer_16
-	chr6	30991454	GCCCAATCCAATTCTCTCTTG	DHS_85	CTCF_31	enhancer_16
-	chr6	30991455	GCCAATCCAATTCTCTCTTGC	DHS_85	CTCF_31	enhancer_16
-	chr6	30998153	GCCCAAGGCACCTCCAAGGAA	DHS_86	-	-
-	chr6	30998154	GCCAAGGCACCTCCAAGGAAA	DHS_86	-	-
-	chr6	30998162	GCCTCCAAGGAAACCCCCCTC	DHS_86	-	-
-	chr6	30998165	GCCAAGGAAACCCCCCTCTGT	DHS_86	-	-
-	chr6	30998174	GCCCCCCTCTGTTGACCCCTC	DHS_86	-	-
-	chr6	30998175	GCCCCCTCTGTTGACCCCTCC	DHS_86	-	-
-	chr6	30998198	GCCCCCAGGTGCTTCTTCATC	DHS_86	-	-
-	chr6	30998199	GCCCCAGGTGCTTCTTCATCC	DHS_86	-	-
-	chr6	30998218	GCCATGGTTCGGGACAGGCAG	DHS_86	-	-
-	chr6	30998451	GCCATCCCCAGGTGCTGCAGG	DHS_87	-	-
-	chr6	30998497	GCCTGCAGAGCTGGCCATTGT	DHS_87	-	-
-	chr6	30998552	GCCACCAGCTCTAGCTCACCA	DHS_87	-	-
-	chr6	30998569	GCCACCTCTGGCTTCCTCTGC	DHS_87	-	-
-	chr6	30998572	GCCTCTGGCTTCCTCTGCAAC	DHS_87	-	-
-	chr6	30998603	GCCCTGCAGCCACAAAGGCAT	DHS_87	-	-
-	chr6	30998604	GCCTGCAGCCACAAAGGCATC	DHS_87	-	-
-	chr6	31018318	GCCTCTGAAAGGTCTCAGCAG	DHS_88	CTCF_32	enhancer_17
-	chr6	31018343	GCCTGTCTGTGCCCTGACTTG	DHS_88	CTCF_32	enhancer_17
-	chr6	31018353	GCCCTGACTTGATGTCTGTCT	DHS_88	CTCF_32	enhancer_17
-	chr6	31018354	GCCTGACTTGATGTCTGTCTC	DHS_88	CTCF_32	enhancer_17
-	chr6	31018374	GCCCTACCTTGAGGGTCTGGA	DHS_88	CTCF_32	enhancer_17
-	chr6	31018375	GCCTACCTTGAGGGTCTGGAG	DHS_88	CTCF_32	enhancer_17
-	chr6	31018423	GCCCGGCCCCATCTCTCCCGC	DHS_88	CTCF_32	enhancer_17
-	chr6	31018424	GCCGGCCCCATCTCTCCCGCC	DHS_88	CTCF_32	enhancer_17
-	chr6	31018447	GCCTTCCCCTTCCTCTCAGGC	DHS_88	CTCF_32	enhancer_17
-	chr6	31018451	GCCCCTTCCTCTCAGGCGGAT	DHS_88	CTCF_32	enhancer_17
-	chr6	31018452	GCCCTTCCTCTCAGGCGGATT	DHS_88	CTCF_32	enhancer_17
-	chr6	31018453	GCCTTCCTCTCAGGCGGATTG	DHS_88	CTCF_32	enhancer_17
-	chr6	31018457	GCCTCTCAGGCGGATTGTCCA	DHS_88	CTCF_32	enhancer_17
-	chr6	31018493	GCCTTCCATCTTGCAGCTTAA	DHS_88	CTCF_32	enhancer_17
-	chr6	31018545	GCCACTCCATACACAGTCGCT	DHS_88	CTCF_32	enhancer_17
-	chr6	31018550	GCCATACACAGTCGCTCTGAG	DHS_88	CTCF_32	enhancer_17
-	chr6	31018597	GCCTGAGATTCCGATGGGGCC	DHS_88	CTCF_32	enhancer_17
-	chr6	31031423	GCCGGGGCGCCGGAAGCTGCT	DHS_89	-	-
-	chr6	31031431	GCCGGAAGCTGCTGTCCCGGC	DHS_89	-	-
-	chr6	31031445	GCCCGGCGGAGTCGCAGCGGG	DHS_89	-	-
-	chr6	31031469	GCCGGTTCCCCGAGACTGCGG	DHS_89	-	-
-	chr6	31031475	GCCCCGAGACTGCGGCCCTCC	DHS_89	-	-
-	chr6	31031476	GCCCGAGACTGCGGCCCTCCC	DHS_89	-	-
-	chr6	31031477	GCCGAGACTGCGGCCCTCCCT	DHS_89	-	-
-	chr6	31031493	GCCCTCGTTCCTCCAGGTTCC	DHS_89	-	-
-	chr6	31031494	GCCTCGTTCCTCCAGGTTCCG	DHS_89	-	-
-	chr6	31031501	GCCTCCAGGTTCCGCTTTGCG	DHS_89	-	-
-	chr6	31031504	GCCAGGTTCCGCTTTGCGGGC	DHS_89	-	-
-	chr6	31031511	GCCGCTTTGCGGGCGGCTTCT	DHS_89	-	-
-	chr6	31050265	GCCCACCTCATGCCTTTATGA	CTCF_33	-	-
-	chr6	31050269	GCCTCATGCCTTTATGATTTT	CTCF_33	-	-
-	chr6	31050276	GCCTTTATGATTTTACCCAAG	CTCF_33	-	-
-	chr6	31050290	GCCCAAGTGAAAACAAATTCA	CTCF_33	-	-
-	chr6	31050428	GCCCCCTGGTGTAGGGGAGGG	CTCF_33	-	-
-	chr6	31050429	GCCCCTGGTGTAGGGGAGGGT	CTCF_33	-	-
-	chr6	31050465	GCCCAGCCCTCCGCAGTTCTT	CTCF_33	-	-
-	chr6	31050466	GCCAGCCCTCCGCAGTTCTTG	CTCF_33	-	-
-	chr6	31050470	GCCCTCCGCAGTTCTTGGTGC	CTCF_33	-	-
-	chr6	31050471	GCCTCCGCAGTTCTTGGTGCC	CTCF_33	-	-
-	chr6	31050474	GCCGCAGTTCTTGGTGCCAAT	CTCF_33	-	-
-	chr6	31050508	GCCAGCAGCAGACTGTGTTCT	CTCF_33	-	-
-	chr6	31057710	GCCAACCTGTCACTGAGCGTT	DHS_90	CTCF_34	enhancer_18
-	chr6	31057714	GCCTGTCACTGAGCGTTCCCG	DHS_90	CTCF_34	enhancer_18
-	chr6	31057730	GCCCGCATACCTGACCCTCTG	DHS_90	CTCF_34	enhancer_18
-	chr6	31057731	GCCGCATACCTGACCCTCTGG	DHS_90	CTCF_34	enhancer_18
-	chr6	31057766	GCCACTAGGCAGACTCACTTC	DHS_90	CTCF_34	enhancer_18
-	chr6	31057795	GCCCAGCACACCGCTGACCCT	DHS_90	CTCF_34	enhancer_18
-	chr6	31057804	GCCGCTGACCCTTTCTGTTTC	DHS_90	CTCF_34	enhancer_18
-	chr6	31057825	GCCAGCTCACTCATTCAGAGC	DHS_90	CTCF_34	enhancer_18
-	chr6	31058137	GCCATTCTCAACCAGTGAGTT	DHS_90	CTCF_34	enhancer_18
-	chr6	31062133	GCCTCCAATGGGGTCAGCATA	DHS_91	-	-
-	chr6	31062170	GCCATACAACCTCCAGTGGGA	DHS_91	-	-
-	chr6	31084082	GCCAGATGGAACGAGAGGGAG	CTCF_35	-	-
-	chr6	31084113	GCCAGCTTGAAGGGCCGAAGT	CTCF_35	-	-
-	chr6	31084139	GCCCACATTGCCAGTAGGAGG	CTCF_35	-	-
-	chr6	31084140	GCCACATTGCCAGTAGGAGGC	CTCF_35	-	-
-	chr6	31084168	GCCCCTCAGAGGACGTGCAGG	CTCF_35	-	-
-	chr6	31084170	GCCTCAGAGGACGTGCAGGAA	CTCF_35	-	-
-	chr6	31084231	GCCTGAGAGGGGCATTAAATT	CTCF_35	-	-
-	chr6	31084270	GCCCAAAAGAGACCTGAAACA	CTCF_35	-	-
-	chr6	31084271	GCCAAAAGAGACCTGAAACAT	CTCF_35	-	-
-	chr6	31118664	GCCCAGGTCCCCCTAGCGGTG	DHS_92	CTCF_36	-
-	chr6	31118665	GCCAGGTCCCCCTAGCGGTGC	DHS_92	CTCF_36	-
-	chr6	31118671	GCCCCCTAGCGGTGCTTCTCT	DHS_92	CTCF_36	-
-	chr6	31118673	GCCCTAGCGGTGCTTCTCTTC	DHS_92	CTCF_36	-
-	chr6	31118674	GCCTAGCGGTGCTTCTCTTCA	DHS_92	CTCF_36	-
-	chr6	31118703	GCCTATTCTTTGGAGTTCCGA	DHS_92	CTCF_36	-
-	chr6	31118719	GCCGAATTCCTAGTAGTCCAG	DHS_92	CTCF_36	-
-	chr6	31118726	GCCTAGTAGTCCAGCCCTCAG	DHS_92	CTCF_36	-
-	chr6	31118735	GCCAGCCCTCAGATCTCCACC	DHS_92	CTCF_36	-
-	chr6	31118739	GCCCTCAGATCTCCACCTTGA	DHS_92	CTCF_36	-
-	chr6	31118750	GCCACCTTGAGACTCCACCCT	DHS_92	CTCF_36	-
-	chr6	31118766	GCCCTCAAGATTCTCATTTTC	DHS_92	CTCF_36	-
-	chr6	31118767	GCCTCAAGATTCTCATTTTCT	DHS_92	CTCF_36	-
-	chr6	31120161	GCCAGCCCCAAACTTTTGTGT	CTCF_37	-	-
-	chr6	31120194	GCCGATGTAGTAAAAATGCAC	CTCF_37	-	-
-	chr6	31120222	GCCCCTCCCAAACCGATTCCG	CTCF_37	-	-
-	chr6	31120223	GCCCTCCCAAACCGATTCCGC	CTCF_37	-	-
-	chr6	31120224	GCCTCCCAAACCGATTCCGCT	CTCF_37	-	-
-	chr6	31120227	GCCCAAACCGATTCCGCTTGA	CTCF_37	-	-
-	chr6	31120228	GCCAAACCGATTCCGCTTGAT	CTCF_37	-	-
-	chr6	31120233	GCCGATTCCGCTTGATTATCT	CTCF_37	-	-
-	chr6	31120254	GCCCCCTAGAGGAAGGGCACA	CTCF_37	-	-
-	chr6	31120255	GCCCCTAGAGGAAGGGCACAA	CTCF_37	-	-
-	chr6	31120363	GCCATCCCCTGTAAACCCTGG	CTCF_37	-	-
-	chr6	31120367	GCCCCTGTAAACCCTGGTCTT	CTCF_37	-	-
-	chr6	31120368	GCCCTGTAAACCCTGGTCTTG	CTCF_37	-	-
-	chr6	31120369	GCCTGTAAACCCTGGTCTTGT	CTCF_37	-	-
-	chr6	31120377	GCCCTGGTCTTGTAACTCCCC	CTCF_37	-	-
-	chr6	31120378	GCCTGGTCTTGTAACTCCCCC	CTCF_37	-	-
-	chr6	31120393	GCCCCCATACCTGGGATATGG	CTCF_37	-	-
-	chr6	31120394	GCCCCATACCTGGGATATGGA	CTCF_37	-	-
-	chr6	31120395	GCCCATACCTGGGATATGGAA	CTCF_37	-	-
-	chr6	31120396	GCCATACCTGGGATATGGAAT	CTCF_37	-	-
-	chr6	31144723	GCCATGGCAACAAATGGCCTG	DHS_93	CTCF_39	enhancer_19
-	chr6	31144739	GCCTGGTCGGAAGAGAGGCCC	DHS_93	CTCF_39	enhancer_19
-	chr6	31144777	GCCTGATGAAATGTCTGGTAG	DHS_93	CTCF_39	enhancer_19
-	chr6	31144797	GCCCCCTAGTGGCAATGACCG	DHS_93	CTCF_39	enhancer_19
-	chr6	31144798	GCCCCTAGTGGCAATGACCGG	DHS_93	CTCF_39	enhancer_19
-	chr6	31144800	GCCTAGTGGCAATGACCGGGT	DHS_93	CTCF_39	enhancer_19
-	chr6	31144814	GCCGGGTAGTGGCCCTCTGCG	DHS_93	CTCF_39	enhancer_19
-	chr6	31144825	GCCCTCTGCGAGATGGGCGCC	DHS_93	CTCF_39	enhancer_19
-	chr6	31144826	GCCTCTGCGAGATGGGCGCCT	DHS_93	CTCF_39	enhancer_19
-	chr6	31144843	GCCTCTCTGGAGATTGAGCGC	DHS_93	CTCF_39	enhancer_19
-	chr6	31144875	GCCTGGAGAAGTTGACTTGTT	DHS_93	CTCF_39	enhancer_19
-	chr6	31146499	GCCTGTATCCCAGGTTTTCAG	DHS_94	CTCF_40	enhancer_20
-	chr6	31146540	GCCAGCAGACTAGTGTGAGGC	DHS_94	CTCF_40	enhancer_20
-	chr6	31146586	GCCGAGCTAATCCTGTCTGAT	DHS_94	CTCF_40	enhancer_20
-	chr6	31146610	GCCACCTACAGGCATCAACAG	DHS_94	CTCF_40	enhancer_20
-	chr6	31146613	GCCTACAGGCATCAACAGGCC	DHS_94	CTCF_40	enhancer_20
-	chr6	31155593	GCCACCGGATGTTCCCACCTG	DHS_95	CTCF_41	enhancer_22
-	chr6	31155596	GCCGGATGTTCCCACCTGGCC	DHS_95	CTCF_41	enhancer_22
-	chr6	31155605	GCCCACCTGGCCACTGATGGG	DHS_95	CTCF_41	enhancer_22
-	chr6	31155606	GCCACCTGGCCACTGATGGGC	DHS_95	CTCF_41	enhancer_22
-	chr6	31155609	GCCTGGCCACTGATGGGCCCT	DHS_95	CTCF_41	enhancer_22
-	chr6	31155626	GCCTGCCGCAGGAGCAACAAG	DHS_95	CTCF_41	enhancer_22
-	chr6	31155655	GCCATAGCTCCCGGAACCAGA	DHS_95	CTCF_41	enhancer_22
-	chr6	31155663	GCCCGGAACCAGAGATAAAAG	DHS_95	CTCF_41	enhancer_22
-	chr6	31155664	GCCGGAACCAGAGATAAAAGA	DHS_95	CTCF_41	enhancer_22
-	chr6	31155692	GCCTCTGGCAGTGTCCCTCCG	DHS_95	CTCF_41	enhancer_22
-	chr6	31159827	GCCTACCAGCTGCAGAGGCCC	DHS_96	CTCF_42	enhancer_23
-	chr6	31159855	GCCCTGAGGGAGATGTGTGTG	DHS_96	CTCF_42	enhancer_23
-	chr6	31159887	GCCAAGTAAGTCCTTCTTTAA	DHS_96	CTCF_42	enhancer_23
-	chr6	31159937	GCCTCCTGCTGGGGAAGGACA	DHS_96	CTCF_42	enhancer_23
-	chr6	31159964	GCCTTTTATGGAAGCCCAACG	DHS_96	CTCF_42	enhancer_23
-	chr6	31159977	GCCCAACGGGAAGGACTCATG	DHS_96	CTCF_42	enhancer_23
-	chr6	31159978	GCCAACGGGAAGGACTCATGG	DHS_96	CTCF_42	enhancer_23
-	chr6	31160012	GCCCTGTCTCTTTTTTAGGCA	DHS_96	CTCF_42	enhancer_23
-	chr6	31160060	GCCAGTTCACTAAGGTACGAA	DHS_96	CTCF_42	enhancer_23
-	chr6	31160081	GCCACAATAAAGTTTGGAGCC	DHS_96	CTCF_42	enhancer_23
-	chr6	31163389	GCCTAAACTATTCGGGCTGTG	DHS_97	CTCF_43	-
-	chr6	31163472	GCCATCTACCGGTAAGAGCGC	DHS_97	CTCF_43	-
-	chr6	31163479	GCCGGTAAGAGCGCCCAACTC	DHS_97	CTCF_43	-
-	chr6	31163498	GCCCTTGCTAAGGATGATATC	DHS_97	CTCF_43	-
-	chr6	31163499	GCCTTGCTAAGGATGATATCA	DHS_97	CTCF_43	-
-	chr6	31178305	GCCTGTGGCCGTCACTGGGAC	DHS_98	CTCF_44	-
-	chr6	31178368	GCCAGGGCCTTCCCTTCAGGG	DHS_98	CTCF_44	-
-	chr6	31186680	GCCTTGCCCCCTGCTGCAGGT	DHS_99	CTCF_45	-
-	chr6	31186688	GCCTGCTGCAGGTGCCATCTC	DHS_99	CTCF_45	-
-	chr6	31186701	GCCATCTCAATTAGTCCTGCT	DHS_99	CTCF_45	-
-	chr6	31186730	GCCCCCTTTCAGATTCCAGCA	DHS_99	CTCF_45	-
-	chr6	31186731	GCCCCTTTCAGATTCCAGCAC	DHS_99	CTCF_45	-
-	chr6	31186732	GCCCTTTCAGATTCCAGCACA	DHS_99	CTCF_45	-
-	chr6	31186733	GCCTTTCAGATTCCAGCACAA	DHS_99	CTCF_45	-
-	chr6	31186744	GCCAGCACAATTCTGGAACAG	DHS_99	CTCF_45	-
-	chr6	31186768	GCCCACCTGGCCGGGGTGAGA	DHS_99	CTCF_45	-
-	chr6	31186769	GCCACCTGGCCGGGGTGAGAC	DHS_99	CTCF_45	-
-	chr6	31186777	GCCGGGGTGAGACTGAGGCTC	DHS_99	CTCF_45	-
-	chr6	31186796	GCCACCCTCAAGCACTTGGGC	DHS_99	CTCF_45	-
-	chr6	31186799	GCCCTCAAGCACTTGGGCACT	DHS_99	CTCF_45	-
-	chr6	31186800	GCCTCAAGCACTTGGGCACTG	DHS_99	CTCF_45	-
-	chr6	31186822	GCCTTTGTGAAGGATGGGGAT	DHS_99	CTCF_45	-
-	chr6	31190069	GCCTTTGCAGCCAAGCAGAGG	DHS_100	-	-
-	chr6	31190123	GCCTACAGGGACAAGCACAAT	DHS_100	-	-
-	chr6	31190151	GCCCTCCTTGGGATGCGGGAA	DHS_100	-	-
-	chr6	31190152	GCCTCCTTGGGATGCGGGAAC	DHS_100	-	-
-	chr6	31190155	GCCTTGGGATGCGGGAACTTC	DHS_100	-	-
-	chr6	31190177	GCCGCCTCAGCCTCTCCCTGC	DHS_100	-	-
-	chr6	31190192	GCCTGCCTGTCTCAGGACTTA	DHS_100	-	-
-	chr6	31190196	GCCTGTCTCAGGACTTAAGTC	DHS_100	-	-
-	chr6	31190224	GCCCACCACACACTCCACTTT	DHS_100	-	-
-	chr6	31190378	GCCACCGGCAGCTCTGTTCTG	DHS_101	Promoter_21	-
-	chr6	31190410	GCCTCTTGATCTAGGCCAGTG	DHS_101	Promoter_21	-
-	chr6	31190464	GCCCATCCTCTCAGTCCTTTA	DHS_101	Promoter_21	-
-	chr6	31190469	GCCTCTCAGTCCTTTACTCTC	DHS_101	Promoter_21	-
-	chr6	31190478	GCCTTTACTCTCTCCACCCCC	DHS_101	Promoter_21	-
-	chr6	31190490	GCCACCCCCAGCTCCAGGAAC	DHS_101	Promoter_21	-
-	chr6	31190494	GCCCCAGCTCCAGGAACAACG	DHS_101	Promoter_21	-
-	chr6	31190502	GCCAGGAACAACGCCCAACTG	DHS_101	Promoter_21	-
-	chr6	31190514	GCCCAACTGGCCTCCTACTCA	DHS_101	Promoter_21	-
-	chr6	31190515	GCCAACTGGCCTCCTACTCAG	DHS_101	Promoter_21	-
-	chr6	31190526	GCCTACTCAGCTGACAGGAAT	DHS_101	Promoter_21	-
-	chr6	31190748	GCCCACGGTGAATGAGGAATG	CTCF_46	-	-
-	chr6	31190749	GCCACGGTGAATGAGGAATGG	CTCF_46	-	-
-	chr6	31190830	GCCAGGCAATCTCTGCTTTCA	CTCF_46	-	-
-	chr6	31190916	GCCGCTTTTGAAGGAAAATGA	CTCF_46	-	-
-	chr6	31190948	GCCTCTAGAGGCGTAGGAAGA	CTCF_46	-	-
-	chr6	31190974	GCCCAGACTCTCAGAGGAGAC	CTCF_46	-	-
-	chr6	31190994	GCCAGGACTCCAAGAAGGCAA	CTCF_46	-	-
-	chr6	31191030	GCCCCACAGTTTACTGAGCCA	CTCF_46	-	-
-	chr6	31191031	GCCCACAGTTTACTGAGCCAT	CTCF_46	-	-
-	chr6	31191032	GCCACAGTTTACTGAGCCATC	CTCF_46	-	-
-	chr6	31191112	GCCCTCACCCAGGGAATCATC	CTCF_46	-	-
-	chr6	31191119	GCCAGGGAATCATCTGAGCAC	CTCF_46	-	-
-	chr6	31203967	GCCAGGGAGTGGATGACATTA	DHS_102	CTCF_47	enhancer_24
-	chr6	31204021	GCCTGAGAGGAGTCTCTAGGC	DHS_102	CTCF_47	enhancer_24
-	chr6	31204043	GCCCTCTGGTGGCAGTTCTTG	DHS_102	CTCF_47	enhancer_24
-	chr6	31204044	GCCTCTGGTGGCAGTTCTTGG	DHS_102	CTCF_47	enhancer_24
-	chr6	31204071	GCCTGAGAGCCGCTACCTTGG	DHS_102	CTCF_47	enhancer_24
-	chr6	31204079	GCCGCTACCTTGGCTCTCAGC	DHS_102	CTCF_47	enhancer_24
-	chr6	31204133	GCCCCTAAAGTCCCATCCCAA	DHS_102	CTCF_47	enhancer_24
-	chr6	31204134	GCCCTAAAGTCCCATCCCAAG	DHS_102	CTCF_47	enhancer_24
-	chr6	31204135	GCCTAAAGTCCCATCCCAAGG	DHS_102	CTCF_47	enhancer_24
-	chr6	31204143	GCCCATCCCAAGGTCACATAG	DHS_102	CTCF_47	enhancer_24
-	chr6	31204144	GCCATCCCAAGGTCACATAGA	DHS_102	CTCF_47	enhancer_24
-	chr6	31204191	GCCCAAGTCACAGTCTGTTGA	DHS_102	CTCF_47	enhancer_24
-	chr6	31204192	GCCAAGTCACAGTCTGTTGAT	DHS_102	CTCF_47	enhancer_24
-	chr6	31204219	GCCATGCTATCCTGCCTGCCC	DHS_102	CTCF_47	enhancer_24
-	chr6	31204236	GCCCCCATCACAGGAGTTGAG	DHS_102	CTCF_47	enhancer_24
-	chr6	31204237	GCCCCATCACAGGAGTTGAGA	DHS_102	CTCF_47	enhancer_24
-	chr6	31204238	GCCCATCACAGGAGTTGAGAT	DHS_102	CTCF_47	enhancer_24
-	chr6	31204239	GCCATCACAGGAGTTGAGATT	DHS_102	CTCF_47	enhancer_24
-	chr6	31213350	GCCTGCCGCCGGCCACCAGGT	DHS_103	CTCF_48	enhancer_25
-	chr6	31213354	GCCGCCGGCCACCAGGTGGCA	DHS_103	CTCF_48	enhancer_25
-	chr6	31213389	GCCATAGCCCTGCCCCAGCGA	DHS_103	CTCF_48	enhancer_25
-	chr6	31213396	GCCTGCCCCAGCGATCGCGCG	DHS_103	CTCF_48	enhancer_25
-	chr6	31213401	GCCCAGCGATCGCGCGGGCAG	DHS_103	CTCF_48	enhancer_25
-	chr6	31213426	GCCGGGTGGGAGGTAGGTGCG	DHS_103	CTCF_48	enhancer_25
-	chr6	31213453	GCCTGGAGGCGAGGTAGGAGA	DHS_103	CTCF_48	enhancer_25
-	chr6	31213557	GCCACCTTACGGGTTCAGAAT	DHS_103	CTCF_48	enhancer_25
-	chr6	31213581	GCCGAGGGAATGAGGAAGAGG	DHS_103	CTCF_48	enhancer_25
-	chr6	31215507	GCCCAGAGCTGTTTGCATCAG	DHS_104	enhancer_26	-
-	chr6	31215508	GCCAGAGCTGTTTGCATCAGT	DHS_104	enhancer_26	-
-	chr6	31215532	GCCAATGGCTCCGGAAGAAGC	DHS_104	enhancer_26	-
-	chr6	31215541	GCCGGAAGAAGCTGCCAGGCT	DHS_104	enhancer_26	-
-	chr6	31215554	GCCAGGCTCCAGCAACCTCAG	DHS_104	enhancer_26	-
-	chr6	31215586	GCCCTCAGGAATCCACCTATC	DHS_104	enhancer_26	-
-	chr6	31215587	GCCTCAGGAATCCACCTATCC	DHS_104	enhancer_26	-
-	chr6	31215597	GCCACCTATCCGCCTCTAGGA	DHS_104	enhancer_26	-
-	chr6	31215617	GCCTTGGCTCCAACTCTATTG	DHS_104	enhancer_26	-
-	chr6	31215625	GCCAACTCTATTGTACTCGTC	DHS_104	enhancer_26	-
-	chr6	31215654	GCCATTCTCCTTTTGGTCTCA	DHS_104	enhancer_26	-
-	chr6	31215677	GCCTTGATCTAAGCCTCCCAG	DHS_104	enhancer_26	-
-	chr6	31215689	GCCTCCCAGAGAGACCCCTAG	DHS_104	enhancer_26	-
-	chr6	31215692	GCCCAGAGAGACCCCTAGAAC	DHS_104	enhancer_26	-
-	chr6	31215693	GCCAGAGAGACCCCTAGAACG	DHS_104	enhancer_26	-
-	chr6	31218156	GCCCACAGATTCCCAGAAATA	DHS_105	-	-
-	chr6	31218157	GCCACAGATTCCCAGAAATAA	DHS_105	-	-
-	chr6	31218256	GCCCCAGGATGGGGAAGGGCT	DHS_105	-	-
-	chr6	31218257	GCCCAGGATGGGGAAGGGCTG	DHS_105	-	-
-	chr6	31218258	GCCAGGATGGGGAAGGGCTGG	DHS_105	-	-
-	chr6	31218796	GCCACAGATTTCTTCTTATCC	DHS_106	enhancer_27	-
-	chr6	31218889	GCCTGGGAAGGAGAGGGTTAA	DHS_106	enhancer_27	-
-	chr6	31218910	GCCTAGCCCGGATAGAGCCTC	DHS_106	enhancer_27	-
-	chr6	31218915	GCCCGGATAGAGCCTCCCTCA	DHS_106	enhancer_27	-
-	chr6	31218916	GCCGGATAGAGCCTCCCTCAC	DHS_106	enhancer_27	-
-	chr6	31218939	GCCTCTTTCCACACCTCTAGC	DHS_106	enhancer_27	-
-	chr6	31218946	GCCACACCTCTAGCCCAGGAA	DHS_106	enhancer_27	-
-	chr6	31218959	GCCAGGAACCAGCCCAGGATG	DHS_106	enhancer_27	-
-	chr6	31218966	GCCAGCCCAGGATGGGCCCTA	DHS_106	enhancer_27	-
-	chr6	31218970	GCCCAGGATGGGCCCTAGTGT	DHS_106	enhancer_27	-
-	chr6	31218971	GCCAGGATGGGCCCTAGTGTC	DHS_106	enhancer_27	-
-	chr6	31219005	GCCTGTCTCCTACCAGCATGA	DHS_106	enhancer_27	-
-	chr6	31219012	GCCTACCAGCATGAGGTTCTT	DHS_106	enhancer_27	-
-	chr6	31219016	GCCAGCATGAGGTTCTTATCC	DHS_106	enhancer_27	-
-	chr6	31219034	GCCCTCTCTAGCTCCTGCAAG	DHS_106	enhancer_27	-
-	chr6	31219035	GCCTCTCTAGCTCCTGCAAGC	DHS_106	enhancer_27	-
-	chr6	31219046	GCCTGCAAGCGCCGGGCCAGT	DHS_106	enhancer_27	-
-	chr6	31219056	GCCGGGCCAGTCGCTGCCCCT	DHS_106	enhancer_27	-
-	chr6	31219061	GCCAGTCGCTGCCCCTCCTCC	DHS_106	enhancer_27	-
-	chr6	31234001	GCCTGCGCAAGGCGGGCGCCC	DHS_107	Promoter_22	-
-	chr6	31234018	GCCCTAAAGTCCTATTTCACT	DHS_107	Promoter_22	-
-	chr6	31234019	GCCTAAAGTCCTATTTCACTC	DHS_107	Promoter_22	-
-	chr6	31234027	GCCTATTTCACTCTGTTGGGA	DHS_107	Promoter_22	-
-	chr6	31234092	GCCCACTAAATGCGTCGGAGC	DHS_107	Promoter_22	-
-	chr6	31234093	GCCACTAAATGCGTCGGAGCA	DHS_107	Promoter_22	-
-	chr6	31234116	GCCGCGCCCAGGCGGCTCCTC	DHS_107	Promoter_22	-
-	chr6	31234122	GCCAGGCGGCTCCTCCTCACT	DHS_107	Promoter_22	-
-	chr6	31234135	GCCTCACTGCGGCAACCCGGG	DHS_107	Promoter_22	-
-	chr6	31234149	GCCCGGGAAAACTTGTGAACT	DHS_107	Promoter_22	-
-	chr6	31234150	GCCGGGAAAACTTGTGAACTA	DHS_107	Promoter_22	-
-	chr6	31234516	GCCGGGTATGCCTTGCATGAT	DHS_108	-	-
-	chr6	31234525	GCCTTGCATGATCGCGGGGAG	DHS_108	-	-
-	chr6	31234551	GCCTGTTTTTATCCCACCTAG	DHS_108	-	-
-	chr6	31234562	GCCCACCTAGAGAAGCCGGGA	DHS_108	-	-
-	chr6	31234563	GCCACCTAGAGAAGCCGGGAA	DHS_108	-	-
-	chr6	31234576	GCCGGGAAGTAGGGGTTTAGG	DHS_108	-	-
-	chr6	31234663	GCCCTCGGAGGTTCAACCAGT	DHS_108	-	-
-	chr6	31234664	GCCTCGGAGGTTCAACCAGTT	DHS_108	-	-
-	chr6	31235219	GCCGCCCATGCTGCCCTGCTT	DHS_109	CTCF_49	-
-	chr6	31235223	GCCATGCTGCCCTGCTTCCAA	DHS_109	CTCF_49	-
-	chr6	31235231	GCCCTGCTTCCAACTGCTGCG	DHS_109	CTCF_49	-
-	chr6	31235232	GCCTGCTTCCAACTGCTGCGC	DHS_109	CTCF_49	-
-	chr6	31235239	GCCAACTGCTGCGCATAGGGG	DHS_109	CTCF_49	-
-	chr6	31235283	GCCTTCCACCCCCCCGCCGGG	DHS_109	CTCF_49	-
-	chr6	31235287	GCCACCCCCCCGCCGGGGCTG	DHS_109	CTCF_49	-
-	chr6	31235292	GCCCCCGCCGGGGCTGGCTGC	DHS_109	CTCF_49	-
-	chr6	31235294	GCCCGCCGGGGCTGGCTGCAC	DHS_109	CTCF_49	-
-	chr6	31235295	GCCGCCGGGGCTGGCTGCACC	DHS_109	CTCF_49	-
-	chr6	31235298	GCCGGGGCTGGCTGCACCTAT	DHS_109	CTCF_49	-
-	chr6	31235313	GCCTATCGCTTGGGCCACAGG	DHS_109	CTCF_49	-
-	chr6	31235326	GCCACAGGGCCGACCTGTGTG	DHS_109	CTCF_49	-
-	chr6	31235334	GCCGACCTGTGTGATGTGGCC	DHS_109	CTCF_49	-
-	chr6	31237345	GCCTCAGGACTTTGCTGCCAT	DHS_110	-	-
-	chr6	31237367	GCCATCCCACGGTCTAGGGGA	DHS_110	-	-
-	chr6	31237371	GCCCACGGTCTAGGGGAGAAG	DHS_110	-	-
-	chr6	31237372	GCCACGGTCTAGGGGAGAAGC	DHS_110	-	-
-	chr6	31237392	GCCGGGTTGGGGCTGGTTTCC	DHS_110	-	-
-	chr6	31237423	GCCCTCCCAGGGGGCTCCACA	DHS_110	-	-
-	chr6	31237447	GCCTCTCAGCACCTTCTCCCC	DHS_110	-	-
-	chr6	31237465	GCCTGCCCCCAAGGCCACACT	DHS_110	-	-
-	chr6	31237472	GCCAAGGCCACACTGATCCTA	DHS_110	-	-
-	chr6	31237478	GCCACACTGATCCTAAACTCC	DHS_110	-	-
-	chr6	31237488	GCCTAAACTCCATAGGCAGCC	DHS_110	-	-
-	chr6	31238198	GCCGGTGACCCTTGTGTCTGT	DHS_111	CTCF_50	enhancer_28
-	chr6	31238225	GCCTTCAGAAATCGACGTGGC	DHS_111	CTCF_50	enhancer_28
-	chr6	31238244	GCCGTCCTCGGAAGTACCCAG	DHS_111	CTCF_50	enhancer_28
-	chr6	31238248	GCCTCGGAAGTACCCAGTGAG	DHS_111	CTCF_50	enhancer_28
-	chr6	31238259	GCCCAGTGAGCGCTCCCATGG	DHS_111	CTCF_50	enhancer_28
-	chr6	31238260	GCCAGTGAGCGCTCCCATGGC	DHS_111	CTCF_50	enhancer_28
-	chr6	31238305	GCCCTGTGCAGCTCCTTGTTG	DHS_111	CTCF_50	enhancer_28
-	chr6	31238306	GCCTGTGCAGCTCCTTGTTGC	DHS_111	CTCF_50	enhancer_28
-	chr6	31238317	GCCTTGTTGCTGCCTGCCCCA	DHS_111	CTCF_50	enhancer_28
-	chr6	31238332	GCCCCAGGAAGAGACAGTGGC	DHS_111	CTCF_50	enhancer_28
-	chr6	31244992	GCCACAATTGCCAGCCATTAT	DHS_112	-	-
-	chr6	31245001	GCCAGCCATTATCATTCAAGG	DHS_112	-	-
-	chr6	31245005	GCCATTATCATTCAAGGCTCA	DHS_112	-	-
-	chr6	31245032	GCCTCCTGCGAAGAGGTTGGG	DHS_112	-	-
-	chr6	31245035	GCCTGCGAAGAGGTTGGGGCT	DHS_112	-	-
-	chr6	31245066	GCCAGAAACCAGTCACACCTT	DHS_112	-	-
-	chr6	31245073	GCCAGTCACACCTTTCTGTGA	DHS_112	-	-
-	chr6	31246404	GCCTGGTGAAATGAGGGCTTG	DHS_113	Promoter_23	-
-	chr6	31246450	GCCTCCCCAGTCCCACCCACT	DHS_113	Promoter_23	-
-	chr6	31246461	GCCACCCACTAGCCTTGACCT	DHS_113	Promoter_23	-
-	chr6	31246464	GCCCACTAGCCTTGACCTCTG	DHS_113	Promoter_23	-
-	chr6	31246478	GCCTCTGGCCCCGCCCCCTGG	DHS_113	Promoter_23	-
-	chr6	31246487	GCCGCCCCCTGGATGGGTGGA	DHS_113	Promoter_23	-
-	chr6	31246892	GCCCGCCTCTGCCGCCCAGTG	DHS_114	-	-
-	chr6	31246893	GCCGCCTCTGCCGCCCAGTGT	DHS_114	-	-
-	chr6	31246896	GCCTCTGCCGCCCAGTGTCAT	DHS_114	-	-
-	chr6	31246906	GCCAGTGTCATGATTAAAGGC	DHS_114	-	-
-	chr6	31246940	GCCAACTTTCAACTCCCAACC	DHS_114	-	-
-	chr6	31246953	GCCCAACCCGCTCCCTGGCAC	DHS_114	-	-
-	chr6	31246964	GCCCTGGCACTCTCTCAGGCT	DHS_114	-	-
-	chr6	31247595	GCCACGGTAGGCCCCGTTCTC	DHS_115	enhancer_29	-
-	chr6	31247639	GCCTCCAGCCCTAGGCCCTGG	DHS_115	enhancer_29	-
-	chr6	31247647	GCCTAGGCCCTGGGTGGGGAA	DHS_115	enhancer_29	-
-	chr6	31247757	GCCTTGGCTGGACAATCCCGG	DHS_115	enhancer_29	-
-	chr6	31247772	GCCCGGTCCCCAGAGGGGGCA	DHS_115	enhancer_29	-
-	chr6	31247773	GCCGGTCCCCAGAGGGGGCAG	DHS_115	enhancer_29	-
-	chr6	31247778	GCCCCAGAGGGGGCAGCTCTA	DHS_115	enhancer_29	-
-	chr6	31247799	GCCCTAAACAAGTGCTCAACC	DHS_115	enhancer_29	-
-	chr6	31247800	GCCTAAACAAGTGCTCAACCC	DHS_115	enhancer_29	-
-	chr6	31247817	GCCCTTGAATGGGCCTGGATG	DHS_115	enhancer_29	-
-	chr6	31247818	GCCTTGAATGGGCCTGGATGG	DHS_115	enhancer_29	-
-	chr6	31247864	GCCAACCCCCCAGTCCCAATC	DHS_115	enhancer_29	-
-	chr6	31247869	GCCCCCAGTCCCAATCCCCTC	DHS_115	enhancer_29	-
-	chr6	31247871	GCCCAGTCCCAATCCCCTCAC	DHS_115	enhancer_29	-
-	chr6	31247877	GCCCAATCCCCTCACACAGAA	DHS_115	enhancer_29	-
-	chr6	31247878	GCCAATCCCCTCACACAGAAT	DHS_115	enhancer_29	-
-	chr6	31247898	GCCCCTTCAGAGACGCTAAAA	DHS_115	enhancer_29	-
-	chr6	31247900	GCCTTCAGAGACGCTAAAAGG	DHS_115	enhancer_29	-
-	chr6	31248370	GCCAGGGCTCCCCACAGCTTC	DHS_116	-	-
-	chr6	31248378	GCCCCACAGCTTCGAAGGCCA	DHS_116	-	-
-	chr6	31248403	GCCAGGTCTGGACTGGGCACG	DHS_116	-	-
-	chr6	31248427	GCCTCTGTCGACTTAAGTAAG	DHS_116	-	-
-	chr6	31248479	GCCTGGGCTTGTCTGCTGGGG	DHS_116	-	-
-	chr6	31248515	GCCTTCTAAGGGGATGGGTGT	DHS_116	-	-
-	chr6	31248818	GCCTCCCCAGCCATCTCAATC	DHS_117	-	-
-	chr6	31248827	GCCATCTCAATCCCCAGGACA	DHS_117	-	-
-	chr6	31248837	GCCCCAGGACAGAACCATCAC	DHS_117	-	-
-	chr6	31248838	GCCCAGGACAGAACCATCACG	DHS_117	-	-
-	chr6	31248839	GCCAGGACAGAACCATCACGG	DHS_117	-	-
-	chr6	31248850	GCCATCACGGCACCTTTGTCA	DHS_117	-	-
-	chr6	31248861	GCCTTTGTCATGCATCTCTCT	DHS_117	-	-
-	chr6	31248927	GCCTGGGATTTGGCTGGAATC	DHS_117	-	-
-	chr6	31248975	GCCTCCAGGTTCCCCAAAAGC	DHS_117	-	-
-	chr6	31248978	GCCAGGTTCCCCAAAAGCGCT	DHS_117	-	-
-	chr6	31248985	GCCCCAAAAGCGCTCTTCCCA	DHS_117	-	-
-	chr6	31248986	GCCCAAAAGCGCTCTTCCCAA	DHS_117	-	-
-	chr6	31248987	GCCAAAAGCGCTCTTCCCAAG	DHS_117	-	-
-	chr6	31250373	GCCTCCCTGTACCCTGCCACC	enhancer_30	-	-
-	chr6	31250376	GCCCTGTACCCTGCCACCTAC	enhancer_30	-	-
-	chr6	31250377	GCCTGTACCCTGCCACCTACC	enhancer_30	-	-
-	chr6	31250391	GCCTACCTCCAAGCATCCTTC	enhancer_30	-	-
-	chr6	31250395	GCCTCCAAGCATCCTTCCTGG	enhancer_30	-	-
-	chr6	31250398	GCCAAGCATCCTTCCTGGGGA	enhancer_30	-	-
-	chr6	31250406	GCCTTCCTGGGGAATCTGGCA	enhancer_30	-	-
-	chr6	31256478	GCCGGCAACCAGGCCGGCGGA	DHS_118	-	-
-	chr6	31256485	GCCAGGCCGGCGGAATCACGT	DHS_118	-	-
-	chr6	31256490	GCCGGCGGAATCACGTGCCAT	DHS_118	-	-
-	chr6	31256506	GCCATGCTCCAGGCCAGCGTA	DHS_118	-	-
-	chr6	31256513	GCCAGGCCAGCGTAGTCCCGC	DHS_118	-	-
-	chr6	31256518	GCCAGCGTAGTCCCGCCCATC	DHS_118	-	-
-	chr6	31256528	GCCCGCCCATCTTCCAGCTGA	DHS_118	-	-
-	chr6	31256529	GCCGCCCATCTTCCAGCTGAG	DHS_118	-	-
-	chr6	31256532	GCCCATCTTCCAGCTGAGCGT	DHS_118	-	-
-	chr6	31256533	GCCATCTTCCAGCTGAGCGTA	DHS_118	-	-
-	chr6	31256540	GCCAGCTGAGCGTACCGGGAG	DHS_118	-	-
-	chr6	31256563	GCCCATTGGACTGGAGCTGCT	DHS_118	-	-
-	chr6	31256613	GCCCCATTGGGTTAAGTCCAG	DHS_118	-	-
-	chr6	31256614	GCCCATTGGGTTAAGTCCAGT	DHS_118	-	-
-	chr6	31256615	GCCATTGGGTTAAGTCCAGTC	DHS_118	-	-
-	chr6	31256629	GCCAGTCCGAGACAAGCGTCT	DHS_118	-	-
-	chr6	31268400	GCCTGGCCTTTACAAGGGATT	DHS_119	CTCF_51	enhancer_31
-	chr6	31268405	GCCTTTACAAGGGATTCTAAT	DHS_119	CTCF_51	enhancer_31
-	chr6	31268465	GCCCTCTGGTGTCCATGTGGG	DHS_119	CTCF_51	enhancer_31
-	chr6	31268476	GCCATGTGGGCCCAAGGATGT	DHS_119	CTCF_51	enhancer_31
-	chr6	31268543	GCCACTTGCCAACTTTTCAAG	DHS_119	CTCF_51	enhancer_31
-	chr6	31268550	GCCAACTTTTCAAGATTCTTA	DHS_119	CTCF_51	enhancer_31
-	chr6	31269038	GCCAAAGATTCTCATTCTTAG	DHS_120	CTCF_52	-
-	chr6	31269058	GCCCATTCTGTTATCCCTATG	DHS_120	CTCF_52	-
-	chr6	31269059	GCCATTCTGTTATCCCTATGA	DHS_120	CTCF_52	-
-	chr6	31269071	GCCCTATGAGTCTGCTAATAG	DHS_120	CTCF_52	-
-	chr6	31269072	GCCTATGAGTCTGCTAATAGT	DHS_120	CTCF_52	-
-	chr6	31269141	GCCTAGGGTCATATACCAGGC	DHS_120	CTCF_52	-
-	chr6	31269160	GCCCAAACAGCTGAGGGCAGT	DHS_120	CTCF_52	-
-	chr6	31269189	GCCTGCAGGTCAATGCTTCGA	DHS_120	CTCF_52	-
-	chr6	31272801	GCCTTTCTCCACTCTGCATTT	DHS_120_2	CTCF_52_2	-
-	chr6	31272808	GCCACTCTGCATTTGACCCCG	DHS_120_2	CTCF_52_2	-
-	chr6	31272842	GCCAGGCCAACACACGTGACC	DHS_120_2	CTCF_52_2	-
-	chr6	31272847	GCCAACACACGTGACCACGTC	DHS_120_2	CTCF_52_2	-
-	chr6	31272860	GCCACGTCTGCCTGGGGCAGT	DHS_120_2	CTCF_52_2	-
-	chr6	31272940	GCCCTCCCGCTGGTCTAGTAT	DHS_120_2	CTCF_52_2	-
-	chr6	31272941	GCCTCCCGCTGGTCTAGTATC	DHS_120_2	CTCF_52_2	-
-	chr6	31273528	GCCTGTCTCCGAATCCGTCGT	DHS_121	Promoter_24	-
-	chr6	31273535	GCCGAATCCGTCGTGGTGTTT	DHS_121	Promoter_24	-
-	chr6	31273541	GCCGTCGTGGTGTTTCAAGCG	DHS_121	Promoter_24	-
-	chr6	31273581	GCCCCAGGCTGGACTCGGAAT	DHS_121	Promoter_24	-
-	chr6	31273582	GCCCAGGCTGGACTCGGAATT	DHS_121	Promoter_24	-
-	chr6	31278409	GCCAGGGTTGAGGTTGGGGGC	DHS_121	-	-
-	chr6	31278436	GCCAGACCCTGCCGGCATCTG	DHS_121	-	-
-	chr6	31278441	GCCCTGCCGGCATCTGCCCCA	DHS_121	-	-
-	chr6	31278446	GCCGGCATCTGCCCCAGAACC	DHS_121	-	-
-	chr6	31278488	GCCTCAATGGAAATGCTGGAG	DHS_121	-	-
-	chr6	31278543	GCCCCTTATTTGGAAATTTTT	DHS_121	-	-
-	chr6	31278545	GCCTTATTTGGAAATTTTTCT	DHS_121	-	-
-	chr6	31279813	GCCATGACTCAGAGGTTTGTC	DHS_122	enhancer_32	-
-	chr6	31279853	GCCCTTCACTACTGGTGAGTA	DHS_122	enhancer_32	-
-	chr6	31279854	GCCTTCACTACTGGTGAGTAC	DHS_122	enhancer_32	-
-	chr6	31279882	GCCAGAGACCCCTGATTGACT	DHS_122	enhancer_32	-
-	chr6	31322417	GCCCAAAGGAAAAGGCAGACT	DHS_123	-	-
-	chr6	31322418	GCCAAAGGAAAAGGCAGACTA	DHS_123	-	-
-	chr6	31328691	GCCCCTTATCTGAGGTCAGTG	CTCF_54	-	-
-	chr6	31328692	GCCCTTATCTGAGGTCAGTGG	CTCF_54	-	-
-	chr6	31328693	GCCTTATCTGAGGTCAGTGGA	CTCF_54	-	-
-	chr6	31328783	GCCATAGAGAATCCAACATCT	CTCF_54	-	-
-	chr6	31347076	GCCAGACATCCTCTGGAGGGT	DHS_124	-	-
-	chr6	31347821	GCCGCATCTCGGCCTCTGGGG	DHS_125	Promoter_25	-
-	chr6	31347832	GCCTCTGGGGAGAATGTGAGT	DHS_125	Promoter_25	-
-	chr6	31347879	GCCGGGACTGCGGAGACGCTG	DHS_125	Promoter_25	-
-	chr6	31383902	GCCTTCCTCCCTCTGTCATTG	DHS_126	-	-
-	chr6	31383909	GCCCTCTGTCATTGGTCACAG	DHS_126	-	-
-	chr6	31383910	GCCTCTGTCATTGGTCACAGA	DHS_126	-	-
-	chr6	31383963	GCCTGGAGCAAAATGGCCCCA	DHS_126	-	-
-	chr6	31384020	GCCCCCCCATCCCTGGGAGAA	DHS_126	-	-
-	chr6	31384024	GCCCATCCCTGGGAGAACCGG	DHS_126	-	-
-	chr6	31384025	GCCATCCCTGGGAGAACCGGG	DHS_126	-	-
-	chr6	31384029	GCCCTGGGAGAACCGGGCTGG	DHS_126	-	-
-	chr6	31397659	GCCTGAATGGTTCATTTCTGT	CTCF_55	-	-
-	chr6	31397683	GCCTGTAGGAGCATTCCTCCT	CTCF_55	-	-
-	chr6	31397697	GCCTCCTTTTGTAAACCTCTA	CTCF_55	-	-
-	chr6	31420745	GCCCAACCTTTTTGATGGCTC	CTCF_56	-	-
-	chr6	31420746	GCCAACCTTTTTGATGGCTCA	CTCF_56	-	-
-	chr6	31420750	GCCTTTTTGATGGCTCACAAG	CTCF_56	-	-
-	chr6	31421088	GCCCCTTTATAAGGTCTCCCT	CTCF_56	-	-
-	chr6	31421089	GCCCTTTATAAGGTCTCCCTG	CTCF_56	-	-
-	chr6	31433061	GCCCGACACAAGTTGGGAGAA	DHS_128	Promoter_26	-
-	chr6	31442705	GCCAAGATTGGCCGGAAGGTT	DHS_129	CTCF_57	enhancer_33
-	chr6	31442758	GCCCTCTCTCCACCTCAAAGC	DHS_129	CTCF_57	enhancer_33
-	chr6	31442824	GCCACCTGGTGGTCGATGCGC	DHS_129	CTCF_57	enhancer_33
-	chr6	31442827	GCCTGGTGGTCGATGCGCTTC	DHS_129	CTCF_57	enhancer_33
-	chr6	31442846	GCCTTTGCAGATCACGCACAG	DHS_129	CTCF_57	enhancer_33
-	chr6	31442866	GCCCTGAGATCCACCTCTCCT	DHS_129	CTCF_57	enhancer_33
-	chr6	31442867	GCCTGAGATCCACCTCTCCTT	DHS_129	CTCF_57	enhancer_33
-	chr6	31442878	GCCTCTCCTTCCTACGCACCA	DHS_129	CTCF_57	enhancer_33
-	chr6	31442887	GCCTACGCACCACGCATTTCT	DHS_129	CTCF_57	enhancer_33
-	chr6	31442895	GCCACGCATTTCTTCACTGGA	DHS_129	CTCF_57	enhancer_33
-	chr6	31442917	GCCAGCCTGCGTCAATCTTCC	DHS_129	CTCF_57	enhancer_33
-	chr6	31472854	GCCACTAGGTGGAAGCAGAGC	DHS_130	CTCF_59	-
-	chr6	31472882	GCCCAGATGGGCTAGATTCTC	DHS_130	CTCF_59	-
-	chr6	31475518	GCCGCAGCTCCCTGGGCCCCT	DHS_131	CTCF_60	-
-	chr6	31475526	GCCCTGGGCCCCTTGTATCAT	DHS_131	CTCF_60	-
-	chr6	31475562	GCCAGTCTTTCATGGAGGCCA	DHS_131	CTCF_60	-
-	chr6	31475889	GCCTGCGGGTCTGCATTTTCA	DHS_132	-	-
-	chr6	31476382	GCCGTCGCAAAAACTTTCGGG	DHS_133	-	-
-	chr6	31479227	GCCAAGCGTGGCCCCGCCCTC	DHS_135	Promoter_27	-
-	chr6	31479271	GCCGGGCCCCAGTTTCATTGG	DHS_135	Promoter_27	-
-	chr6	31479277	GCCCAGTTTCATTGGATGAGC	DHS_135	Promoter_27	-
-	chr6	31479278	GCCAGTTTCATTGGATGAGCG	DHS_135	Promoter_27	-
-	chr6	31479307	GCCGGGCCAGGTGACTAAGTT	DHS_135	Promoter_27	-
-	chr6	31479312	GCCAGGTGACTAAGTTTCCGC	DHS_135	Promoter_27	-
-	chr6	31517489	GCCCCACTCAGCCCGCAGCCT	DHS_136	CTCF_61	enhancer_35
-	chr6	31517490	GCCCACTCAGCCCGCAGCCTG	DHS_136	CTCF_61	enhancer_35
-	chr6	31517491	GCCACTCAGCCCGCAGCCTGG	DHS_136	CTCF_61	enhancer_35
-	chr6	31517499	GCCCGCAGCCTGGTCCCCGAA	DHS_136	CTCF_61	enhancer_35
-	chr6	31517500	GCCGCAGCCTGGTCCCCGAAA	DHS_136	CTCF_61	enhancer_35
-	chr6	31517506	GCCTGGTCCCCGAAAGCGCTC	DHS_136	CTCF_61	enhancer_35
-	chr6	31517512	GCCCCGAAAGCGCTCAGTCAG	DHS_136	CTCF_61	enhancer_35
-	chr6	31517513	GCCCGAAAGCGCTCAGTCAGA	DHS_136	CTCF_61	enhancer_35
-	chr6	31517514	GCCGAAAGCGCTCAGTCAGAA	DHS_136	CTCF_61	enhancer_35
-	chr6	31517535	GCCGAGAGCACTGTGGCGGCG	DHS_136	CTCF_61	enhancer_35
-	chr6	31517556	GCCCCGTGTGGCCACAGGACT	DHS_136	CTCF_61	enhancer_35
-	chr6	31517558	GCCGTGTGGCCACAGGACTGA	DHS_136	CTCF_61	enhancer_35
-	chr6	31517566	GCCACAGGACTGAAGACAGAG	DHS_136	CTCF_61	enhancer_35
-	chr6	31517610	GCCAGGACGTCCCAGGCTCTC	DHS_136	CTCF_61	enhancer_35
-	chr6	31517619	GCCCAGGCTCTCCCCCTGTTC	DHS_136	CTCF_61	enhancer_35
-	chr6	31517620	GCCAGGCTCTCCCCCTGTTCC	DHS_136	CTCF_61	enhancer_35
-	chr6	31517629	GCCCCCTGTTCCCCGCACCTG	DHS_136	CTCF_61	enhancer_35
-	chr6	31517630	GCCCCTGTTCCCCGCACCTGG	DHS_136	CTCF_61	enhancer_35
-	chr6	31517639	GCCCGCACCTGGACGGGACTC	DHS_136	CTCF_61	enhancer_35
-	chr6	31517640	GCCGCACCTGGACGGGACTCT	DHS_136	CTCF_61	enhancer_35
-	chr6	31517676	GCCCGGTCTCGTGTCAGGCTC	DHS_136	CTCF_61	enhancer_35
-	chr6	31518353	GCCAGCCCCGGGAAGCCTGGG	DHS_137	CTCF_62	-
-	chr6	31518358	GCCCGGGAAGCCTGGGGTCAC	DHS_137	CTCF_62	-
-	chr6	31518367	GCCTGGGGTCACAGCACTCGG	DHS_137	CTCF_62	-
-	chr6	31518443	GCCAGTGGCCACAGGGTCACA	DHS_137	CTCF_62	-
-	chr6	31518450	GCCACAGGGTCACAGGCAGAG	DHS_137	CTCF_62	-
-	chr6	31538767	GCCCGAGCTCCGCTCTCTCTC	DHS_138	Promoter_28	-
-	chr6	31538775	GCCGCTCTCTCTCTTCCACCT	DHS_138	Promoter_28	-
-	chr6	31538802	GCCTGTGTCAGGTCCTTTTAC	DHS_138	Promoter_28	-
-	chr6	31538814	GCCTTTTACCTGGATACTCAT	DHS_138	Promoter_28	-
-	chr6	31538821	GCCTGGATACTCATGATGCGG	DHS_138	Promoter_28	-
-	chr6	31538896	GCCGCGGTTCCTGGTTCTAAA	DHS_138	Promoter_28	-
-	chr6	31538918	GCCTCGCCGGCCCACCGGGAC	DHS_138	Promoter_28	-
-	chr6	31538923	GCCGGCCCACCGGGACTCAGA	DHS_138	Promoter_28	-
-	chr6	31550747	GCCTTGGAGCAAACGTCTGCC	DHS_139	CTCF_63	-
-	chr6	31550767	GCCTGCCAGTGCATCCCGTAG	DHS_139	CTCF_63	-
-	chr6	31550771	GCCAGTGCATCCCGTAGGTAT	DHS_139	CTCF_63	-
-	chr6	31550780	GCCCGTAGGTATCATCCCATC	DHS_139	CTCF_63	-
-	chr6	31550781	GCCGTAGGTATCATCCCATCC	DHS_139	CTCF_63	-
-	chr6	31550799	GCCACCAGTGCCTTGGCAGGA	DHS_139	CTCF_63	-
-	chr6	31550802	GCCAGTGCCTTGGCAGGACCC	DHS_139	CTCF_63	-
-	chr6	31550808	GCCTTGGCAGGACCCCACTCA	DHS_139	CTCF_63	-
-	chr6	31550821	GCCACTCACTCAACCCTCCCC	DHS_139	CTCF_63	-
-	chr6	31550833	GCCCTCCCCCTGGTGGTAGTC	DHS_139	CTCF_63	-
-	chr6	31550837	GCCCCCTGGTGGTAGTCCCTG	DHS_139	CTCF_63	-
-	chr6	31550839	GCCCTGGTGGTAGTCCCTGGT	DHS_139	CTCF_63	-
-	chr6	31550840	GCCTGGTGGTAGTCCCTGGTG	DHS_139	CTCF_63	-
-	chr6	31550877	GCCTGCCTCCAGCCGCACAAA	DHS_139	CTCF_63	-
-	chr6	31550881	GCCTCCAGCCGCACAAATCCC	DHS_139	CTCF_63	-
-	chr6	31550884	GCCAGCCGCACAAATCCCCAA	DHS_139	CTCF_63	-
-	chr6	31550888	GCCGCACAAATCCCCAAGAAT	DHS_139	CTCF_63	-
-	chr6	31550898	GCCCCAAGAATGGCACGTGGG	DHS_139	CTCF_63	-
-	chr6	31550899	GCCCAAGAATGGCACGTGGGT	DHS_139	CTCF_63	-
-	chr6	31550900	GCCAAGAATGGCACGTGGGTA	DHS_139	CTCF_63	-
