# Supplementary material for: A new class of temporarily phenotypic enhancers identified by CRISPR/Cas9-mediated genetic screening
Source: HighWire-hosted journal article supplement (doi:10.1101/gr.197152.115), 2016-01-26
Supplement: Table_S3.xlsx [file Table_S3.xlsx]

## Sheet: Table legend
SUPPLEMENTAL Table S3. Data analysis of CRISPR/Cas9 screening experiments. We first identified sgRNA candidates that are enriched in eGFP- population by meeting the criteria of (a) each sgRNA should have a sequencing coverage of 50 reads and (b) each sgRNA should have at least two fold enrichment in eGFP- population. We then generated the high confident elements that control POU5F1 expression if …

## Sheet: raw reads
strand	chr	start	ref	seq	sgRNA category	Candidate regulatory regions			Low_1(YD36)	Ctrl_1(YD37)	Low_2(YD38)	Ctrl_2(YD39)	Low_3(YD44)	Ctrl_3(YD45)	Low_4(YD46)	Ctrl_4(YD47)	pred_Low_1	pred_Low_2	pred_Low_3	pred_Low_4	Fold Rep_1	Fold Rep_2	Fold Rep_3	Fold Rep_4
+	chr6	30523104	GATAGAAAATCCATTGGACTTGG	GATAGAAAATCCATTGGACT	regulatory-gDNA sequences	CTCF_1	DHS_1	-	0	0	0	0	0	0	0	0	2.64249	1.25247	5.82205	6.00696	0	0	0	0
-	chr6	30523114	CCATTGGACTTGGAGACTCAGTG	GCCATTGGACTTGGAGACTCA	ineffective-gDNA	CTCF_1	DHS_1	-	37	102	0	0	145	239	46	117	110.993	1.25247	199.425	149.197	0.333355	0	0.727091	0.308316
+	chr6	30523140	TGTATTCCCGATCTCACCACTGG	GTGTATTCCCGATCTCACCAC	regulatory-gDNA sequences	CTCF_1	DHS_1	-	0	0	0	0	0	0	0	0	2.64249	1.25247	5.82205	6.00696	0	0	0	0
+	chr6	30523143	ATTCCCGATCTCACCACTGGAGG	GATTCCCGATCTCACCACTGG	regulatory-gDNA sequences	CTCF_1	DHS_1	-	194	97	99	153	142	123	135	120	105.979	144.383	113.882	152.629	1.83055	0.685676	1.2469	0.884496
+	chr6	30523144	TTCCCGATCTCACCACTGGAGGG	GTTCCCGATCTCACCACTGGA	regulatory-gDNA sequences	CTCF_1	DHS_1	-	0	0	0	0	0	0	0	0	2.64249	1.25247	5.82205	6.00696	0	0	0	0
-	chr6	30523146	CCCGATCTCACCACTGGAGGGAG	GCCCGATCTCACCACTGGAGG	ineffective-gDNA	CTCF_1	DHS_1	-	0	0	0	0	0	0	1	0	2.64249	1.25247	5.82205	6.00696	0	0	0	0.166474
+	chr6	30523147	CCGATCTCACCACTGGAGGGAGG	GCCGATCTCACCACTGGAGGG	regulatory-gDNA sequences	CTCF_1	DHS_1	-	12	19	32	76	150	180	21	98	25.2399	79.3692	156.848	127.202	0.475437	0.403179	0.956338	0.165092
+	chr6	30523150	ATCTCACCACTGGAGGGAGGTGG	GATCTCACCACTGGAGGGAGG	regulatory-gDNA sequences	CTCF_1	DHS_1	-	48	93	103	152	119	310	135	127	101.993	143.564	250.006	160.595	0.47062	0.717449	0.475988	0.840624
+	chr6	30523151	TCTCACCACTGGAGGGAGGTGGG	GTCTCACCACTGGAGGGAGGT	regulatory-gDNA sequences	CTCF_1	DHS_1	-	7	0	19	23	21	28	0	44	2.64249	27.546	32.4976	62.0388	2.64902	0.689756	0.646201	0
+	chr6	30523173	GAGAGGCATATGAGTGAGTGTGG	GAGAGGCATATGAGTGAGTG	regulatory-gDNA sequences	CTCF_1	DHS_1	-	11	42	0	0	51	0	164	73	50.9045	1.25247	5.82205	97.5426	0.216091	0	8.75981	1.68132
-	chr6	30523209	CCCAGCCAGCTAGTGTGCAGGTT	GCCCAGCCAGCTAGTGTGCAG	ineffective-gDNA	CTCF_1	DHS_1	-	4404	3711	2148	3937	4818	8662	6908	7496	4450.84	3899.97	6882.95	8077.43	0.989476	0.550773	0.699991	0.855222
-	chr6	30523210	CCAGCCAGCTAGTGTGCAGGTTG	GCCAGCCAGCTAGTGTGCAGG	ineffective-gDNA	CTCF_1	DHS_1	-	55	162	13	63	111	149	181	314	172.94	67.52	133.844	352.586	0.31803	0.192536	0.829325	0.513349
-	chr6	30523214	CCAGCTAGTGTGCAGGTTGCCCT	GCCAGCTAGTGTGCAGGTTGC	ineffective-gDNA	CTCF_1	DHS_1	-	12788	16895	16008	17574	24803	33624	30363	30744	19315.5	16347.4	26156.8	32688.4	0.662058	0.979237	0.948244	0.92886
+	chr6	30523230	TTGCCCTGCAGATTCTCACCAGG	GTTGCCCTGCAGATTCTCACC	regulatory-gDNA sequences	CTCF_1	DHS_1	-	0	8	0	0	0	26	27	0	12.3235	1.25247	30.6334	6.00696	0	0	0	4.49479
+	chr6	30523231	TGCCCTGCAGATTCTCACCAGGG	GTGCCCTGCAGATTCTCACCA	regulatory-gDNA sequences	CTCF_1	DHS_1	-	0	62	61	88	179	238	146	52	71.4241	89.97	198.71	71.9546	0	0.678004	0.900809	2.02906
+	chr6	30523262	AAGCCCAGAGGGCACCCCAGAGG	GAAGCCCAGAGGGCACCCCAG	regulatory-gDNA sequences	CTCF_1	DHS_1	-	0	0	0	0	0	0	0	0	2.64249	1.25247	5.82205	6.00696	0	0	0	0
-	chr6	30526786	CCTCAACTTAAATAGTGCTGAGC	GCCTCAACTTAAATAGTGCTG	ineffective-gDNA	DHS_2	-	-	0	0	0	0	0	0	0	0	2.64249	1.25247	5.82205	6.00696	0	0	0	0
+	chr6	30526805	GAGCTGCAACTTGTTTTCCGCGG	GAGCTGCAACTTGTTTTCCG	regulatory-gDNA sequences	DHS_2	-	-	370	475	350	716	966	883	1203	1075	466.202	598.997	720.743	1225.48	0.793648	0.58431	1.34028	0.981658
+	chr6	30526818	TTTTCCGCGGCTTGTAGTCGAGG	GTTTTCCGCGGCTTGTAGTCG	regulatory-gDNA sequences	DHS_2	-	-	904	686	332	650	2013	1442	1519	1207	672.745	548.782	1202.61	1380.32	1.34375	0.604976	1.67385	1.10047
+	chr6	30526821	TCCGCGGCTTGTAGTCGAGGAGG	GTCCGCGGCTTGTAGTCGAGG	regulatory-gDNA sequences	DHS_2	-	-	0	0	0	0	0	0	0	0	2.64249	1.25247	5.82205	6.00696	0	0	0	0
-	chr6	30526822	CCGCGGCTTGTAGTCGAGGAGGA	GCCGCGGCTTGTAGTCGAGGA	ineffective-gDNA	DHS_2	-	-	0	0	0	0	0	0	0	0	2.64249	1.25247	5.82205	6.00696	0	0	0	0
+	chr6	30526832	TAGTCGAGGAGGAGCCCACGAGG	GTAGTCGAGGAGGAGCCCACG	regulatory-gDNA sequences	DHS_2	-	-	0	0	0	0	0	0	0	0	2.64249	1.25247	5.82205	6.00696	0	0	0	0
-	chr6	30526846	CCCACGAGGCTTTAGCTGCTGCA	GCCCACGAGGCTTTAGCTGCT	ineffective-gDNA	DHS_2	-	-	0	0	0	0	0	0	0	0	2.64249	1.25247	5.82205	6.00696	0	0	0	0
-	chr6	30526847	CCACGAGGCTTTAGCTGCTGCAA	GCCACGAGGCTTTAGCTGCTG	ineffective-gDNA	DHS_2	-	-	159	242	135	186	470	599	675	496	254.858	171.537	475.472	540.874	0.623876	0.787	0.988492	1.24798
+	chr6	30526873	CCAAGCGCGCTCCCGCCCAGCGG	GCCAAGCGCGCTCCCGCCCAG	regulatory-gDNA sequences	DHS_2	-	-	74	115	0	0	261	243	195	193	124.175	1.25247	202.282	232.847	0.595935	0	1.29028	0.83746
+	chr6	30526876	AGCGCGCTCCCGCCCAGCGGTGG	GAGCGCGCTCCCGCCCAGCGG	regulatory-gDNA sequences	DHS_2	-	-	0	0	0	0	0	0	0	0	2.64249	1.25247	5.82205	6.00696	0	0	0	0
-	chr6	30526900	CCCGGGCTCAGGGAACCAGCGCT	GCCCGGGCTCAGGGAACCAGC	ineffective-gDNA	DHS_2	-	-	0	0	0	0	0	0	0	0	2.64249	1.25247	5.82205	6.00696	0	0	0	0
-	chr6	30526901	CCGGGCTCAGGGAACCAGCGCTG	GCCGGGCTCAGGGAACCAGCG	ineffective-gDNA	DHS_2	-	-	0	0	0	0	0	0	0	0	2.64249	1.25247	5.82205	6.00696	0	0	0	0
-	chr6	30526915	CCAGCGCTGCTTCTCTCCGAGGC	GCCAGCGCTGCTTCTCTCCGA	ineffective-gDNA	DHS_2	-	-	361	180	119	300	411	784	883	595	191.749	276.248	634.346	654.942	1.88267	0.430773	0.647912	1.34821
+	chr6	30526921	CTGCTTCTCTCCGAGGCTCGCGG	GCTGCTTCTCTCCGAGGCTCG	regulatory-gDNA sequences	DHS_2	-	-	779	1291	2143	1574	2628	2510	2471	2733	1433.98	1476.84	2048.44	3018.2	0.543243	1.45107	1.28293	0.818699
-	chr6	30526931	CCGAGGCTCGCGGCCTGAGAAAC	GCCGAGGCTCGCGGCCTGAGA	ineffective-gDNA	DHS_2	-	-	21	46	0	0	69	59	28	187	55.1187	1.25247	60.6825	226.529	0.380996	0	1.13707	0.123605
+	chr6	30526949	GAAACCTTCCGCTCCGAATG	GAAACCTTCCGCTCCGAATG	control-gDNA sequences	-	-	-	0	8	17	29	165	0	1	0	12.3235	33.9591	5.82205	6.00696	0	0.500602	28.3406	0.166474
+	chr6	30527181	GGATAGCCCAATCGGATGCT	GGATAGCCCAATCGGATGCT	control-gDNA sequences	-	-	-	102	157	218	302	226	281	278	324	167.711	278.179	229.348	362.209	0.608191	0.783667	0.985404	0.767512
+	chr6	30527182	GATAGCCCAATCGGATGCTG	GATAGCCCAATCGGATGCTG	control-gDNA sequences	-	-	-	52	78	6	23	115	347	244	118	87.2165	27.546	276.543	150.343	0.596218	0.217818	0.415849	1.62296
+	chr6	30527184	TAGCCCAATCGGATGCTGGG	GTAGCCCAATCGGATGCTGGG	control-gDNA sequences	-	-	-	0	3	0	0	0	69	0	0	6.30508	1.25247	69.4668	6.00696	0	0	0	0
-	chr6	30527191	CGGACCCCCCAGCATCCGAT	GCGGACCCCCCAGCATCCGAT	control-gDNA sequences	-	-	-	102	252	268	373	315	258	422	281	264.562	342.247	212.977	320.801	0.385543	0.783059	1.47903	1.31546
+	chr6	30527193	CGGATGCTGGGGGGTCCGTT	GCGGATGCTGGGGGGTCCGTT	control-gDNA sequences	-	-	-	611	855	625	950	1669	1994	2079	1522	879.321	822.135	1641.11	1730.26	0.694854	0.760216	1.01699	1.20155
-	chr6	30527517	ATATGTCGCAGGACCGGTGG	GATATGTCGCAGGACCGGTGG	control-gDNA sequences	-	-	-	342	67	1	0	214	365	191	272	76.3912	1.25247	289.582	312.082	4.47695	0.798421	0.738997	0.612019
+	chr6	30527955	CCACGGAGGTACTTCGCCTG	GCCACGGAGGTACTTCGCCTG	control-gDNA sequences	-	-	-	12	24	11	45	39	64	170	108	30.991	50.2891	65.0996	138.835	0.38721	0.218735	0.599082	1.22447
+	chr6	30527959	GGAGGTACTTCGCCTGAGGC	GGAGGTACTTCGCCTGAGGC	control-gDNA sequences	-	-	-	6	4	0	0	15	44	0	23	7.51709	1.25247	47.2043	35.6247	0.798182	0	0.317768	0
-	chr6	30528817	CGACGATCACCGACCAGGAG	GCGACGATCACCGACCAGGAG	control-gDNA sequences	-	-	-	0	0	0	0	0	0	0	0	2.64249	1.25247	5.82205	6.00696	0	0	0	0
-	chr6	30528817	CTCCTGGTCGGTGATCGTCG	GCTCCTGGTCGGTGATCGTCG	control-gDNA sequences	-	-	-	0	0	0	0	0	0	0	0	2.64249	1.25247	5.82205	6.00696	0	0	0	0
-	chr6	30528822	GTCCGCGACGATCACCGACC	GTCCGCGACGATCACCGACC	control-gDNA sequences	-	-	-	0	14	0	0	0	33	0	0	19.4187	1.25247	37.1323	6.00696	0	0	0	0
+	chr6	30529453	GGAGGAAACATCTGTACTCCAGG	GGAGGAAACATCTGTACTCC	regulatory-gDNA sequences	CTCF_2	DHS_3	-	0	0	0	0	0	0	0	0	2.64249	1.25247	5.82205	6.00696	0	0	0	0
+	chr6	30529473	AGGATTTAGAGACACCGACACGG	GAGGATTTAGAGACACCGACA	regulatory-gDNA sequences	CTCF_2	DHS_3	-	36	74	54	74	0	47	49	1	83.2896	77.5735	49.9228	7.31069	0.432227	0.696114	0	6.70251
+	chr6	30529474	GGATTTAGAGACACCGACACGGG	GGATTTAGAGACACCGACAC	regulatory-gDNA sequences	CTCF_2	DHS_3	-	26	116	44	48	290	178	124	209	125.196	53.2378	155.384	249.441	0.207674	0.826481	1.86635	0.497111
+	chr6	30529480	AGAGACACCGACACGGGAGCAGG	GAGAGACACCGACACGGGAGC	regulatory-gDNA sequences	CTCF_2	DHS_3	-	171	160	0	4	257	263	267	203	170.848	6.03616	216.538	243.26	1.00089	0	1.18686	1.09759
+	chr6	30529481	GAGACACCGACACGGGAGCAGGG	GAGACACCGACACGGGAGCA	regulatory-gDNA sequences	CTCF_2	DHS_3	-	174	453	667	213	930	1215	1527	1691	446.494	194.345	1010.67	1910.04	0.389703	3.43204	0.92018	0.799459
-	chr6	30529487	CCGACACGGGAGCAGGGCGCCCC	GCCGACACGGGAGCAGGGCGC	ineffective-gDNA	CTCF_2	DHS_3	-	464	909	651	877	1922	1962	2184	1875	948.206	745.129	1615.84	2105.76	0.489345	0.873674	1.18947	1.03715
-	chr6	30529524	CCTGTTCTGCAGCTGGAAACCGA	GCCTGTTCTGCAGCTGGAAAC	ineffective-gDNA	CTCF_2	DHS_3	-	0	0	0	0	0	0	0	0	2.64249	1.25247	5.82205	6.00696	0	0	0	0
+	chr6	30529529	TCTGCAGCTGGAAACCGAACGGG	GTCTGCAGCTGGAAACCGAAC	regulatory-gDNA sequences	CTCF_2	DHS_3	-	0	0	0	0	0	0	0	0	2.64249	1.25247	5.82205	6.00696	0	0	0	0
+	chr6	30529538	GGAAACCGAACGGGACCCTGTGG	GGAAACCGAACGGGACCCTG	regulatory-gDNA sequences	CTCF_2	DHS_3	-	18	43	69	133	138	143	73	113	51.9644	127.966	129.301	144.604	0.346391	0.539205	1.06728	0.504826
-	chr6	30529543	CCGAACGGGACCCTGTGGAAGTC	GCCGAACGGGACCCTGTGGAA	ineffective-gDNA	CTCF_2	DHS_3	-	0	0	0	0	0	0	0	0	2.64249	1.25247	5.82205	6.00696	0	0	0	0
+	chr6	30529547	ACGGGACCCTGTGGAAGTCGCGG	GACGGGACCCTGTGGAAGTCG	regulatory-gDNA sequences	CTCF_2	DHS_3	-	1	26	0	0	190	178	272	74	33.2744	1.25247	155.384	98.7454	0.0300531	0	1.22278	2.75456
+	chr6	30529548	CGGGACCCTGTGGAAGTCGCGGG	GCGGGACCCTGTGGAAGTCGC	regulatory-gDNA sequences	CTCF_2	DHS_3	-	364	565	289	524	869	1337	1173	1056	549.298	458.357	1114.92	1202.95	0.662664	0.630513	0.779431	0.9751
+	chr6	30529551	GACCCTGTGGAAGTCGCGGGTGG	GACCCTGTGGAAGTCGCGGG	regulatory-gDNA sequences	CTCF_2	DHS_3	-	1457	243	97	163	446	424	431	254	255.837	152.575	333.271	294.519	5.69504	0.635754	1.33825	1.4634
+	chr6	30529552	ACCCTGTGGAAGTCGCGGGTGGG	GACCCTGTGGAAGTCGCGGGT	regulatory-gDNA sequences	CTCF_2	DHS_3	-	486	424	52	146	593	759	881	825	420.688	138.649	612.642	927.059	1.15525	0.375049	0.967939	0.950317
-	chr6	30529553	CCCTGTGGAAGTCGCGGGTGGGG	GCCCTGTGGAAGTCGCGGGTG	ineffective-gDNA	CTCF_2	DHS_3	-	517	1058	692	1314	1669	1262	2337	2018	1138	1204.81	1051.08	2257.86	0.454305	0.574362	1.58789	1.03505
-	chr6	30529554	CCTGTGGAAGTCGCGGGTGGGGA	GCCTGTGGAAGTCGCGGGTGG	ineffective-gDNA	CTCF_2	DHS_3	-	3167	4740	4122	5259	8019	9707	11027	10400	5703.03	5218.01	7700.31	11157.7	0.555319	0.789957	1.04139	0.988286
+	chr6	30529563	GTCGCGGGTGGGGAAGCGAAAGG	GTCGCGGGTGGGGAAGCGAA	regulatory-gDNA sequences	CTCF_2	DHS_3	-	0	0	0	0	0	0	0	0	2.64249	1.25247	5.82205	6.00696	0	0	0	0
+	chr6	30529564	TCGCGGGTGGGGAAGCGAAAGGG	GTCGCGGGTGGGGAAGCGAAA	regulatory-gDNA sequences	CTCF_2	DHS_3	-	0	0	0	0	0	0	0	0	2.64249	1.25247	5.82205	6.00696	0	0	0	0
+	chr6	30529592	GAGCGTCTGTCCTCAGTCCTTGG	GAGCGTCTGTCCTCAGTCCT	regulatory-gDNA sequences	CTCF_2	DHS_3	-	6	51	20	27	72	146	154	106	60.299	31.8401	131.577	136.519	0.0995042	0.628138	0.54721	1.12805
+	chr6	30529593	AGCGTCTGTCCTCAGTCCTTGGG	GAGCGTCTGTCCTCAGTCCTT	regulatory-gDNA sequences	CTCF_2	DHS_3	-	0	0	0	0	0	0	0	0	2.64249	1.25247	5.82205	6.00696	0	0	0	0
+	chr6	30539387	AGTACACTAAGTACAATAAATGG	GAGTACACTAAGTACAATAAA	regulatory-gDNA sequences	DHS_4	-	-	0	0	0	0	0	0	0	0	2.64249	1.25247	5.82205	6.00696	0	0	0	0
+	chr6	30539396	AGTACAATAAATGGTAAACTTGG	GAGTACAATAAATGGTAAACT	regulatory-gDNA sequences	DHS_4	-	-	0	0	0	0	0	0	0	0	2.64249	1.25247	5.82205	6.00696	0	0	0	0
+	chr6	30539454	GTAATAATATTAGTACTAAGTGG	GTAATAATATTAGTACTAAG	regulatory-gDNA sequences	DHS_4	-	-	0	0	0	0	0	0	0	0	2.64249	1.25247	5.82205	6.00696	0	0	0	0
+	chr6	30539488	GAAACCGCAAACCGCAGCCATGG	GAAACCGCAAACCGCAGCCA	regulatory-gDNA sequences	DHS_4	-	-	782	977	487	845	1551	2182	1990	1596	1034.87	712.452	1789.55	1808.98	0.755647	0.683554	0.866697	1.10007
-	chr6	30539492	CCGCAAACCGCAGCCATGGCAGA	GCCGCAAACCGCAGCCATGGC	ineffective-gDNA	DHS_4	-	-	2260	4178	2935	5479	4515	7181	6949	7386	5021.33	5434.8	5722.7	7960.7	0.45008	0.540038	0.788964	0.872914
+	chr6	30539494	GCAAACCGCAGCCATGGCAGAGG	GCAAACCGCAGCCATGGCAG	regulatory-gDNA sequences	DHS_4	-	-	253	600	15	111	796	1223	708	969	583.278	109.66	1017.57	1099.32	0.433755	0.136787	0.782256	0.644033
-	chr6	30539499	CCGCAGCCATGGCAGAGGAACCT	GCCGCAGCCATGGCAGAGGAA	ineffective-gDNA	DHS_4	-	-	0	0	0	0	0	0	0	0	2.64249	1.25247	5.82205	6.00696	0	0	0	0
-	chr6	30539505	CCATGGCAGAGGAACCTCAGCTT	GCCATGGCAGAGGAACCTCAG	ineffective-gDNA	DHS_4	-	-	0	0	0	0	0	0	0	0	2.64249	1.25247	5.82205	6.00696	0	0	0	0
+	chr6	30539516	GAACCTCAGCTTAAATAGTGTGG	GAACCTCAGCTTAAATAGTG	regulatory-gDNA sequences	DHS_4	-	-	0	0	0	0	0	0	0	0	2.64249	1.25247	5.82205	6.00696	0	0	0	0
-	chr6	30539519	CCTCAGCTTAAATAGTGTGGAGC	GCCTCAGCTTAAATAGTGTGG	ineffective-gDNA	DHS_4	-	-	127	190	113	278	966	294	230	157	202.156	254.484	238.601	194.097	0.628227	0.444035	4.0486	1.18498
+	chr6	30539521	TCAGCTTAAATAGTGTGGAGCGG	GTCAGCTTAAATAGTGTGGAG	regulatory-gDNA sequences	DHS_4	-	-	0	0	0	0	0	0	0	0	2.64249	1.25247	5.82205	6.00696	0	0	0	0
+	chr6	30539528	AAATAGTGTGGAGCGGCCACTGG	GAAATAGTGTGGAGCGGCCAC	regulatory-gDNA sequences	DHS_4	-	-	220	482	750	369	872	1113	1100	1081	472.506	338.849	922.163	1232.58	0.465602	2.21338	0.945603	0.892436
+	chr6	30539537	GGAGCGGCCACTGGTTTCCG	GGAGCGGCCACTGGTTTCCG	control-gDNA sequences	-	-	-	1599	1368	453	925	2086	2546	2534	2788	1531.58	795.773	2076.85	3076.68	1.04402	0.569258	1.00441	0.823615
-	chr6	30539547	CTACGAGCCGCGGAAACCAG	GCTACGAGCCGCGGAAACCAG	control-gDNA sequences	-	-	-	2	10	0	0	105	0	0	31	14.703	1.25247	5.82205	45.7543	0.136027	0	18.0349	0
-	chr6	30539557	GCGGGCGCGACTACGAGCCG	GCGGGCGCGACTACGAGCCG	control-gDNA sequences	-	-	-	0	4	0	0	0	0	45	65	7.51709	1.25247	5.82205	87.8697	0	0	0	0.512122
+	chr6	30539558	GGCTCGTAGTCGCGCCCGCG	GGCTCGTAGTCGCGCCCGCG	control-gDNA sequences	-	-	-	7	41	150	158	12	150	219	35	49.8403	148.478	134.598	50.7877	0.140449	1.01025	0.0891545	4.31207
+	chr6	30539901	GATGGCCCAATCGGGCGCTG	GATGGCCCAATCGGGCGCTG	control-gDNA sequences	-	-	-	153	264	195	317	837	426	237	396	275.976	292.428	334.784	432.813	0.554395	0.666832	2.50012	0.547581
+	chr6	30539904	GGCCCAATCGGGCGCTGTGG	GGCCCAATCGGGCGCTGTGG	control-gDNA sequences	-	-	-	0	0	0	0	0	0	0	0	2.64249	1.25247	5.82205	6.00696	0	0	0	0
-	chr6	30540233	CCGGTAGCCGGTGACGGGGC	GCCGGTAGCCGGTGACGGGGC	control-gDNA sequences	-	-	-	2	45	28	23	103	114	196	375	54.0713	27.546	106.786	411.842	0.0369882	1.01648	0.964542	0.475911
+	chr6	30540235	CCCGTCACCGGCTACCGGCT	GCCCGTCACCGGCTACCGGCT	control-gDNA sequences	-	-	-	1261	247	49	76	271	384	887	278	259.733	79.3692	303.473	317.898	4.85499	0.617368	0.892996	2.7902
+	chr6	30540240	CACCGGCTACCGGCTAGGTC	GCACCGGCTACCGGCTAGGTC	control-gDNA sequences	-	-	-	84	133	47	154	217	348	284	227	142.703	145.202	277.264	267.719	0.588633	0.323687	0.782647	1.06081
-	chr6	30540283	GTGGACGCCGAGCGCCCGCT	GTGGACGCCGAGCGCCCGCT	control-gDNA sequences	-	-	-	279	457	215	517	341	761	601	704	450.067	453.321	614.376	783.004	0.619908	0.474278	0.555035	0.767557
-	chr6	30540922	CCCAAGCTCCATTCAGCCTGGGC	GCCCAAGCTCCATTCAGCCTG	ineffective-gDNA	DHS_5	-	-	1099	659	232	548	967	973	1545	1488	643.605	475.522	799.628	1694.09	1.70757	0.487885	1.20931	0.911994
-	chr6	30540923	CCAAGCTCCATTCAGCCTGGGCT	GCCAAGCTCCATTCAGCCTGG	ineffective-gDNA	DHS_5	-	-	244	363	283	658	179	614	546	458	366.482	554.69	488.175	498.009	0.66579	0.510195	0.366671	1.09636
-	chr6	30541797	GGGATACCCTTAGAACAGAC	GGGATACCCTTAGAACAGAC	control-gDNA sequences	-	-	-	0	0	0	0	0	0	0	0	2.64249	1.25247	5.82205	6.00696	0	0	0	0
-	chr6	30542373	TCGCTGTCGGCGCCGCGGCG	GTCGCTGTCGGCGCCGCGGCG	control-gDNA sequences	-	-	-	0	0	0	0	0	0	0	0	2.64249	1.25247	5.82205	6.00696	0	0	0	0
-	chr6	30542373	CGCCGCGGCGCCGACAGCGA	GCGCCGCGGCGCCGACAGCGA	control-gDNA sequences	-	-	-	454	950	4185	1494	1730	2070	2535	1617	1000.47	1393.26	1701.12	1831.32	0.453786	3.00375	1.01697	1.38425
+	chr6	30542614	ACGAGGACGATCTGTCGCCC	GACGAGGACGATCTGTCGCCC	control-gDNA sequences	-	-	-	213	468	64	77	629	868	894	723	459.915	80.2637	707.617	805.523	0.463129	0.797372	0.888899	1.10984
-	chr6	30543280	AGTCATCCTACTGACAACGA	GAGTCATCCTACTGACAACGA	control-gDNA sequences	-	-	-	0	0	0	0	0	0	0	0	2.64249	1.25247	5.82205	6.00696	0	0	0	0
+	chr6	30544651	GTTCTTCCGCCCGCTGTTGG	GTTCTTCCGCCCGCTGTTGG	control-gDNA sequences	-	-	-	3930	4628	2807	4635	7738	9802	9846	8338	5567.59	4599.17	7774.56	8970.85	0.70587	0.610328	0.995297	1.09756
-	chr6	30544683	AGCCCGCAGTGTGGTCCGAA	GAGCCCGCAGTGTGGTCCGAA	control-gDNA sequences	-	-	-	334	31	0	10	131	105	76	83	38.929	13.0382	99.5804	109.508	8.57973	0	1.31552	0.694014
-	chr6	30557906	CCCTGTTCTGCCGAGATCCGAAG	GCCCTGTTCTGCCGAGATCCG	ineffective-gDNA	CTCF_3	DHS_6	-	1432	1699	1181	1545	4093	3818	4635	3060	1949.89	1446.56	3079.67	3365.86	0.734401	0.816422	1.32904	1.37706
+	chr6	30557907	CCTGTTCTGCCGAGATCCGAAGG	GCCTGTTCTGCCGAGATCCGA	regulatory-gDNA sequences	CTCF_3	DHS_6	-	26	104	0	0	96	55	246	246	113.007	1.25247	57.1159	286.643	0.230073	0	1.68079	0.858209
+	chr6	30557908	CTGTTCTGCCGAGATCCGAAGGG	GCTGTTCTGCCGAGATCCGAA	regulatory-gDNA sequences	CTCF_3	DHS_6	-	0	0	0	0	0	0	0	0	2.64249	1.25247	5.82205	6.00696	0	0	0	0
+	chr6	30557909	TGTTCTGCCGAGATCCGAAGGGG	GTGTTCTGCCGAGATCCGAAG	regulatory-gDNA sequences	CTCF_3	DHS_6	-	0	0	0	0	0	0	0	0	2.64249	1.25247	5.82205	6.00696	0	0	0	0
-	chr6	30557916	CCGAGATCCGAAGGGGAACCTGG	GCCGAGATCCGAAGGGGAACC	ineffective-gDNA	CTCF_3	DHS_6	-	0	0	0	0	0	0	0	0	2.64249	1.25247	5.82205	6.00696	0	0	0	0
+	chr6	30557917	CGAGATCCGAAGGGGAACCTGGG	GCGAGATCCGAAGGGGAACCT	regulatory-gDNA sequences	CTCF_3	DHS_6	-	0	0	0	0	0	0	0	0	2.64249	1.25247	5.82205	6.00696	0	0	0	0
+	chr6	30557918	GAGATCCGAAGGGGAACCTGGGG	GAGATCCGAAGGGGAACCTG	regulatory-gDNA sequences	CTCF_3	DHS_6	-	0	0	0	0	0	0	0	0	2.64249	1.25247	5.82205	6.00696	0	0	0	0
-	chr6	30557923	CCGAAGGGGAACCTGGGGAGGTC	GCCGAAGGGGAACCTGGGGAG	ineffective-gDNA	CTCF_3	DHS_6	-	0	0	0	0	0	0	0	0	2.64249	1.25247	5.82205	6.00696	0	0	0	0
+	chr6	30557932	AACCTGGGGAGGTCCCAGATGGG	GAACCTGGGGAGGTCCCAGAT	regulatory-gDNA sequences	CTCF_3	DHS_6	-	2	24	0	0	30	260	68	108	30.991	1.25247	214.402	138.835	0.064535	0	0.139924	0.489789
+	chr6	30557973	GGTGTCTCTCCTCAGTCCTTCGG	GGTGTCTCTCCTCAGTCCTT	regulatory-gDNA sequences	CTCF_3	DHS_6	-	0	0	0	0	0	0	0	0	2.64249	1.25247	5.82205	6.00696	0	0	0	0
+	chr6	30558004	GGCCGCTGCCGCTCTACGCTTGG	GGCCGCTGCCGCTCTACGCT	regulatory-gDNA sequences	CTCF_3	DHS_6	-	20	45	0	0	72	0	1	47	54.0713	1.25247	5.82205	65.7671	0.369882	0	12.3668	0.0152052
+	chr6	30558005	GCCGCTGCCGCTCTACGCTTGGG	GCCGCTGCCGCTCTACGCTT	regulatory-gDNA sequences	CTCF_3	DHS_6	-	36	88	0	5	0	128	34	82	97.0446	7.21734	117.78	108.318	0.370963	0	0	0.313892
-	chr6	30558006	CCGCTGCCGCTCTACGCTTGGGT	GCCGCTGCCGCTCTACGCTTG	ineffective-gDNA	CTCF_3	DHS_6	-	518	702	1603	1078	902	1193	1249	895	690.532	956.949	991.667	1010.81	0.750146	1.67512	0.90958	1.23564
-	chr6	30558012	CCGCTCTACGCTTGGGTTCTGAT	GCCGCTCTACGCTTGGGTTCT	ineffective-gDNA	CTCF_3	DHS_6	-	327	641	704	711	857	1574	1389	1111	624.743	595.056	1309.34	1268.02	0.523415	1.18308	0.654527	1.09541
+	chr6	30559501	TCGACCCTTTAAAAGCTGTTTGG	GTCGACCCTTTAAAAGCTGTT	regulatory-gDNA sequences	CTCF_4	-	-	0	0	0	0	0	0	0	0	2.64249	1.25247	5.82205	6.00696	0	0	0	0
+	chr6	30559502	CGACCCTTTAAAAGCTGTTTGGG	GCGACCCTTTAAAAGCTGTTT	regulatory-gDNA sequences	CTCF_4	-	-	0	0	0	0	0	0	0	0	2.64249	1.25247	5.82205	6.00696	0	0	0	0
-	chr6	30559505	CCCTTTAAAAGCTGTTTGGGCTA	GCCCTTTAAAAGCTGTTTGGG	ineffective-gDNA	CTCF_4	-	-	0	0	0	0	0	0	0	0	2.64249	1.25247	5.82205	6.00696	0	0	0	0
-	chr6	30559506	CCTTTAAAAGCTGTTTGGGCTAT	GCCTTTAAAAGCTGTTTGGGC	ineffective-gDNA	CTCF_4	-	-	155	276	170	300	539	830	864	575	287.255	276.248	674.414	631.701	0.53959	0.61539	0.799212	1.36774
-	chr6	30559534	CCATTCAATGAGAAACTTCAGTC	GCCATTCAATGAGAAACTTCA	ineffective-gDNA	CTCF_4	-	-	0	0	0	0	0	0	0	0	2.64249	1.25247	5.82205	6.00696	0	0	0	0
+	chr6	30559601	AATAAACAAAATTGCCATTAGGG	GAATAAACAAAATTGCCATTA	regulatory-gDNA sequences	CTCF_4	-	-	0	0	0	0	0	0	0	0	2.64249	1.25247	5.82205	6.00696	0	0	0	0
+	chr6	30559602	ATAAACAAAATTGCCATTAGGGG	GATAAACAAAATTGCCATTAG	regulatory-gDNA sequences	CTCF_4	-	-	0	0	0	0	0	0	0	0	2.64249	1.25247	5.82205	6.00696	0	0	0	0
-	chr6	30559615	CCATTAGGGGTCGCACCAGTCTC	GCCATTAGGGGTCGCACCAGT	ineffective-gDNA	CTCF_4	-	-	166	269	96	194	378	523	211	353	280.689	178.214	411.73	390.265	0.591401	0.538677	0.918077	0.540658
+	chr6	30559628	CACCAGTCTCAAGAAAAATCTGG	GCACCAGTCTCAAGAAAAATC	regulatory-gDNA sequences	CTCF_4	-	-	0	0	0	0	0	0	0	0	2.64249	1.25247	5.82205	6.00696	0	0	0	0
-	chr6	30559712	CCTATACTAGGCACACTATTAAA	GCCTATACTAGGCACACTATT	ineffective-gDNA	CTCF_4	-	-	0	0	0	0	0	0	0	0	2.64249	1.25247	5.82205	6.00696	0	0	0	0
+	chr6	30559749	AGCCTCTACCATTTCCTCACAGG	GAGCCTCTACCATTTCCTCAC	regulatory-gDNA sequences	CTCF_4	-	-	0	0	0	0	0	0	0	0	2.64249	1.25247	5.82205	6.00696	0	0	0	0
+	chr6	30559750	GCCTCTACCATTTCCTCACAGGG	GCCTCTACCATTTCCTCACA	regulatory-gDNA sequences	CTCF_4	-	-	0	0	0	0	0	0	0	0	2.64249	1.25247	5.82205	6.00696	0	0	0	0
+	chr6	30563643	CACTAGTGAGGCGGCTAGTG	GCACTAGTGAGGCGGCTAGTG	control-gDNA sequences	-	-	-	32	108	62	122	343	283	233	262	117.052	118.861	230.771	302.349	0.273383	0.521619	1.48632	0.770634
+	chr6	30563644	ACTAGTGAGGCGGCTAGTGA	GACTAGTGAGGCGGCTAGTGA	control-gDNA sequences	-	-	-	0	0	0	0	0	0	0	0	2.64249	1.25247	5.82205	6.00696	0	0	0	0
+	chr6	30565107	TTCCCGTTCCTCTCGTAACCTGG	GTTCCCGTTCCTCTCGTAACC	regulatory-gDNA sequences	DHS_7	Promoter_1	-	192	136	56	83	66	311	358	122	145.815	85.5866	250.72	154.911	1.31674	0.654308	0.263242	2.311
-	chr6	30565109	CCCGTTCCTCTCGTAACCTGGTC	GCCCGTTCCTCTCGTAACCTG	ineffective-gDNA	DHS_7	Promoter_1	-	38	90	10	10	30	49	687	208	99.0199	13.0382	51.7286	248.414	0.383761	0.766976	0.57995	2.76554
-	chr6	30565110	CCGTTCCTCTCGTAACCTGGTCA	GCCGTTCCTCTCGTAACCTGG	ineffective-gDNA	DHS_7	Promoter_1	-	66	103	121	271	259	158	292	422	111.999	247.512	140.597	459.463	0.589289	0.488866	1.84214	0.635525
-	chr6	30565115	CCTCTCGTAACCTGGTCATGTGT	GCCTCTCGTAACCTGGTCATG	ineffective-gDNA	DHS_7	Promoter_1	-	1113	2281	2276	3397	2661	3829	3464	3294	2680.64	3353.93	3088.33	3614.61	0.4152	0.678607	0.86163	0.958333
-	chr6	30565125	CCTGGTCATGTGTCCTTCTTCCT	GCCTGGTCATGTGTCCTTCTT	ineffective-gDNA	DHS_7	Promoter_1	-	0	0	0	0	0	0	0	0	2.64249	1.25247	5.82205	6.00696	0	0	0	0
-	chr6	30565145	CCTGGATACTCATGACGCAGACT	GCCTGGATACTCATGACGCAG	ineffective-gDNA	DHS_7	Promoter_1	-	40	52	135	220	798	295	792	344	61.3246	200.41	239.313	381.523	0.652267	0.673619	3.33455	2.07589
-	chr6	30565207	CCAATCAGCGTCGCCACGACTCC	GCCAATCAGCGTCGCCACGAC	ineffective-gDNA	DHS_7	Promoter_1	-	634	1303	563	967	2758	2565	2451	2710	1449.2	840.056	2091.84	2993.75	0.437483	0.670194	1.31846	0.818706
-	chr6	30565220	CCACGACTCCCGACTATAAAGTC	GCCACGACTCCCGACTATAAA	ineffective-gDNA	DHS_7	Promoter_1	-	0	0	0	0	0	0	0	0	2.64249	1.25247	5.82205	6.00696	0	0	0	0
-	chr6	30565228	CCCGACTATAAAGTCCCCATCCG	GCCCGACTATAAAGTCCCCAT	ineffective-gDNA	DHS_7	Promoter_1	-	100	164	467	299	159	230	156	312	175.031	275.279	192.987	350.663	0.571326	1.69646	0.823889	0.444872
+	chr6	30565229	CCGACTATAAAGTCCCCATCCGG	GCCGACTATAAAGTCCCCATC	regulatory-gDNA sequences	DHS_7	Promoter_1	-	104	164	105	237	298	574	830	443	175.031	215.485	454.385	481.684	0.594179	0.487274	0.655831	1.72312
-	chr6	30565242	CCCCATCCGGACTCAAGAAGTTC	GCCCCATCCGGACTCAAGAAG	ineffective-gDNA	DHS_7	Promoter_1	-	0	0	0	0	0	0	0	0	2.64249	1.25247	5.82205	6.00696	0	0	0	0
-	chr6	30565243	CCCATCCGGACTCAAGAAGTTCT	GCCCATCCGGACTCAAGAAGT	ineffective-gDNA	DHS_7	Promoter_1	-	0	0	0	0	0	0	0	0	2.64249	1.25247	5.82205	6.00696	0	0	0	0
-	chr6	30565244	CCATCCGGACTCAAGAAGTTCTC	GCCATCCGGACTCAAGAAGTT	ineffective-gDNA	DHS_7	Promoter_1	-	0	0	0	0	0	0	0	0	2.64249	1.25247	5.82205	6.00696	0	0	0	0
+	chr6	30565247	TCCGGACTCAAGAAGTTCTCAGG	GTCCGGACTCAAGAAGTTCTC	regulatory-gDNA sequences	DHS_7	Promoter_1	-	0	0	0	0	0	0	0	0	2.64249	1.25247	5.82205	6.00696	0	0	0	0
-	chr6	30565248	CCGGACTCAAGAAGTTCTCAGGA	GCCGGACTCAAGAAGTTCTCA	ineffective-gDNA	DHS_7	Promoter_1	-	0	0	0	0	0	0	0	0	2.64249	1.25247	5.82205	6.00696	0	0	0	0
+	chr6	30565260	AGTTCTCAGGACTCAGAGGCTGG	GAGTTCTCAGGACTCAGAGGC	regulatory-gDNA sequences	DHS_7	Promoter_1	-	0	5	0	0	0	20	0	0	8.72483	1.25247	25.0043	6.00696	0	0	0	0
+	chr6	30565261	GTTCTCAGGACTCAGAGGCTGGG	GTTCTCAGGACTCAGAGGCT	regulatory-gDNA sequences	DHS_7	Promoter_1	-	0	0	0	0	0	0	0	0	2.64249	1.25247	5.82205	6.00696	0	0	0	0
-	chr6	30565662	CCGGGAGACACGGAGCGCCAGGG	GCCGGGAGACACGGAGCGCCA	ineffective-gDNA	DHS_8	-	-	20	55	73	122	155	108	422	244	64.3826	118.861	101.995	284.667	0.310643	0.614164	1.51968	1.48244
-	chr6	30565679	CCAGGGACACCGCACAGATTTTC	GCCAGGGACACCGCACAGATT	ineffective-gDNA	DHS_8	-	-	8	68	50	157	171	115	115	91	77.38	147.659	107.58	118.982	0.103386	0.338619	1.58951	0.966532
-	chr6	30565688	CCGCACAGATTTTCCGAGTGAAT	GCCGCACAGATTTTCCGAGTG	ineffective-gDNA	DHS_8	-	-	2076	2065	1210	2146	2106	3546	3039	3065	2410.14	2071.48	2865.38	3371.18	0.861362	0.584123	0.734982	0.901466
+	chr6	30565705	GTGAATCTGCGGACGCTGCGCGG	GTGAATCTGCGGACGCTGCG	regulatory-gDNA sequences	DHS_8	-	-	520	833	862	860	1570	2267	1939	1821	851.241	727.501	1856.65	2048.33	0.610873	1.18488	0.845607	0.946627
+	chr6	30565808	CGCGGGTCCCCTCGAATCTT	GCGCGGGTCCCCTCGAATCTT	control-gDNA sequences	-	-	-	0	0	0	0	0	0	0	0	2.64249	1.25247	5.82205	6.00696	0	0	0	0
+	chr6	30565900	ACCCGGTTCTTTTTCAGTTTAGG	GACCCGGTTCTTTTTCAGTTT	regulatory-gDNA sequences	DHS_9	-	-	79	131	0	1	71	114	241	143	140.632	2.4568	106.786	178.588	0.561749	0	0.664878	1.34948
+	chr6	30565916	GTTTAGGCCAAAATGCCCACAGG	GTTTAGGCCAAAATGCCCAC	regulatory-gDNA sequences	DHS_9	-	-	0	0	0	0	0	0	0	0	2.64249	1.25247	5.82205	6.00696	0	0	0	0
+	chr6	30565917	TTTAGGCCAAAATGCCCACAGGG	GTTTAGGCCAAAATGCCCACA	regulatory-gDNA sequences	DHS_9	-	-	0	0	0	0	0	0	0	0	2.64249	1.25247	5.82205	6.00696	0	0	0	0
+	chr6	30565923	CCAAAATGCCCACAGGGTGGTGG	GCCAAAATGCCCACAGGGTGG	regulatory-gDNA sequences	DHS_9	-	-	102	185	55	64	145	294	324	411	196.959	68.4473	238.601	448.082	0.517875	0.803538	0.60771	0.723081
+	chr6	30565929	TGCCCACAGGGTGGTGGCGACGG	GTGCCCACAGGGTGGTGGCGA	regulatory-gDNA sequences	DHS_9	-	-	259	472	612	889	465	960	1328	1263	463.505	757.794	788.227	1444.86	0.558786	0.807608	0.589932	0.919119
+	chr6	30565930	GCCCACAGGGTGGTGGCGACGGG	GCCCACAGGGTGGTGGCGAC	regulatory-gDNA sequences	DHS_9	-	-	0	1	0	0	0	0	0	0	3.86787	1.25247	5.82205	6.00696	0	0	0	0
+	chr6	30565931	CCCACAGGGTGGTGGCGACGGGG	GCCCACAGGGTGGTGGCGACG	regulatory-gDNA sequences	DHS_9	-	-	0	0	0	0	0	0	0	0	2.64249	1.25247	5.82205	6.00696	0	0	0	0
+	chr6	30565932	CCACAGGGTGGTGGCGACGGGGG	GCCACAGGGTGGTGGCGACGG	regulatory-gDNA sequences	DHS_9	-	-	0	0	0	0	0	0	0	0	2.64249	1.25247	5.82205	6.00696	0	0	0	0
+	chr6	30565942	GTGGCGACGGGGGCGGGGCTTGG	GTGGCGACGGGGGCGGGGCT	regulatory-gDNA sequences	DHS_9	-	-	416	758	790	1277	1200	2201	1135	1340	756.191	1166.01	1804.55	1532.16	0.550125	0.677522	0.664985	0.740782
+	chr6	30565961	TTGGTGGGCGGGACTGACTAAGG	GTTGGTGGGCGGGACTGACTA	regulatory-gDNA sequences	DHS_9	-	-	29	83	0	0	184	162	157	119	92.1241	1.25247	143.577	151.487	0.314793	0	1.28154	1.0364
+	chr6	30565962	TGGTGGGCGGGACTGACTAAGGG	GTGGTGGGCGGGACTGACTAA	regulatory-gDNA sequences	DHS_9	-	-	0	0	0	0	0	0	0	0	2.64249	1.25247	5.82205	6.00696	0	0	0	0
+	chr6	30565963	GGTGGGCGGGACTGACTAAGGGG	GGTGGGCGGGACTGACTAAG	regulatory-gDNA sequences	DHS_9	-	-	0	0	0	0	0	0	0	0	2.64249	1.25247	5.82205	6.00696	0	0	0	0
+	chr6	30565966	GGGCGGGACTGACTAAGGGGCGG	GGGCGGGACTGACTAAGGGG	regulatory-gDNA sequences	DHS_9	-	-	38	58	0	16	0	213	154	152	67.4151	19.8428	180.781	188.582	0.563672	0	0	0.81662
+	chr6	30565967	GGCGGGACTGACTAAGGGGCGGG	GGCGGGACTGACTAAGGGGC	regulatory-gDNA sequences	DHS_9	-	-	120	274	85	217	19	11	13	25	285.383	197.802	16.4545	38.1651	0.420488	0.429723	1.1547	0.340626
+	chr6	30565968	GCGGGACTGACTAAGGGGCGGGG	GCGGGACTGACTAAGGGGCG	regulatory-gDNA sequences	DHS_9	-	-	89	219	240	261	239	264	322	407	231.933	237.792	217.25	443.984	0.383731	1.00929	1.10012	0.725252
+	chr6	30565973	ACTGACTAAGGGGCGGGGCCAGG	GACTGACTAAGGGGCGGGGCC	regulatory-gDNA sequences	DHS_9	-	-	888	929	667	1200	1180	1631	874	1492	973.706	1085.2	1354.38	1698.35	0.91198	0.614636	0.871246	0.514618
+	chr6	30565974	CTGACTAAGGGGCGGGGCCAGGG	GCTGACTAAGGGGCGGGGCCA	regulatory-gDNA sequences	DHS_9	-	-	189	583	461	601	652	732	946	654	566.627	513.287	589.269	723.996	0.333553	0.898133	1.10645	1.30664
+	chr6	30566000	CACACCCTGCAGTGGATGCATGG	GCACACCCTGCAGTGGATGCA	regulatory-gDNA sequences	DHS_9	-	-	484	590	438	705	883	1051	855	1041	573.448	590.361	867.986	1185.14	0.844017	0.741919	1.0173	0.721434
-	chr6	30566004	CCCTGCAGTGGATGCATGGCTGC	GCCCTGCAGTGGATGCATGGC	ineffective-gDNA	DHS_9	-	-	1448	794	396	864	1239	1742	1832	1993	801.441	731.593	1442.07	2231.27	1.80675	0.541284	0.859179	0.821056
-	chr6	30566005	CCTGCAGTGGATGCATGGCTGCG	GCCTGCAGTGGATGCATGGCT	ineffective-gDNA	DHS_9	-	-	752	1493	664	1274	1635	1862	2434	2345	1689.78	1162.87	1536.86	2605.63	0.445028	0.571003	1.06386	0.934131
+	chr6	30566011	GTGGATGCATGGCTGCGAGCTGG	GTGGATGCATGGCTGCGAGC	regulatory-gDNA sequences	DHS_9	-	-	35	85	8	27	91	199	106	324	94.0899	31.8401	170.673	362.209	0.371985	0.251255	0.533183	0.292649
+	chr6	30566012	TGGATGCATGGCTGCGAGCTGGG	GTGGATGCATGGCTGCGAGCT	regulatory-gDNA sequences	DHS_9	-	-	255	505	2838	336	1338	1013	591	643	493.372	309.899	834.7	711.071	0.516851	9.15783	1.60297	0.831141
+	chr6	30566013	GGATGCATGGCTGCGAGCTGGGG	GGATGCATGGCTGCGAGCTG	regulatory-gDNA sequences	DHS_9	-	-	59	138	0	0	283	190	193	304	147.893	1.25247	164.142	342.969	0.398938	0	1.72411	0.562733
+	chr6	30568185	GCTGAGTGTAAGTGCGGGGC	GCTGAGTGTAAGTGCGGGGC	control-gDNA sequences	-	-	-	52	225	89	173	471	416	367	661	237.985	160.788	327.242	732.233	0.218501	0.553524	1.4393	0.501207
-	chr6	30569570	CCAGGCCACAGGAGAGAGTGCCT	GCCAGGCCACAGGAGAGAGTG	ineffective-gDNA	CTCF_5	DHS_10	-	174	362	203	459	554	947	629	574	365.589	410.687	776.826	630.541	0.475944	0.494294	0.713158	0.997556
-	chr6	30569575	CCACAGGAGAGAGTGCCTTGTGG	GCCACAGGAGAGAGTGCCTTG	ineffective-gDNA	CTCF_5	DHS_10	-	522	25	13	20	0	22	89	0	32.1338	24.2747	26.8868	6.00696	16.2446	0.535538	0	14.8162
+	chr6	30569583	GAGAGTGCCTTGTGGAGCGCTGG	GAGAGTGCCTTGTGGAGCGC	regulatory-gDNA sequences	CTCF_5	DHS_10	-	221	388	236	483	441	860	1138	570	388.739	428.565	700.621	625.905	0.568505	0.550674	0.629442	1.81817
+	chr6	30569584	AGAGTGCCTTGTGGAGCGCTGGG	GAGAGTGCCTTGTGGAGCGCT	regulatory-gDNA sequences	CTCF_5	DHS_10	-	116	254	99	184	225	486	259	259	266.481	169.876	381.468	299.417	0.435303	0.582776	0.589827	0.865013
+	chr6	30569607	AGCAGGACCTGACCACCACCAGG	GAGCAGGACCTGACCACCACC	regulatory-gDNA sequences	CTCF_5	DHS_10	-	0	0	0	0	0	0	0	0	2.64249	1.25247	5.82205	6.00696	0	0	0	0
+	chr6	30569652	GGCAGCATGCAGCGCCCCCTTGG	GGCAGCATGCAGCGCCCCCT	regulatory-gDNA sequences	CTCF_5	DHS_10	-	173	317	45	137	560	721	360	589	325.058	131.26	579.77	647.96	0.532213	0.342831	0.965901	0.55559
+	chr6	30569653	GCAGCATGCAGCGCCCCCTTGGG	GCAGCATGCAGCGCCCCCTT	regulatory-gDNA sequences	CTCF_5	DHS_10	-	225	571	119	260	339	1094	484	579	555.042	236.835	905.583	636.342	0.405375	0.50246	0.374344	0.760598
+	chr6	30569664	CGCCCCCTTGGGAAAGCTTTAGG	GCGCCCCCTTGGGAAAGCTTT	regulatory-gDNA sequences	CTCF_5	DHS_10	-	8	31	2	10	0	0	24	53	38.929	13.0382	5.82205	73.1876	0.205502	0.153395	0	0.327924
-	chr6	30569689	CCAGCCTGCAACCCATTCGAGCA	GCCAGCCTGCAACCCATTCGA	ineffective-gDNA	CTCF_5	DHS_10	-	0	0	0	0	0	0	0	0	2.64249	1.25247	5.82205	6.00696	0	0	0	0
-	chr6	30569693	CCTGCAACCCATTCGAGCAGCCA	GCCTGCAACCCATTCGAGCAG	ineffective-gDNA	CTCF_5	DHS_10	-	0	0	0	0	0	0	0	0	2.64249	1.25247	5.82205	6.00696	0	0	0	0
+	chr6	30569699	ACCCATTCGAGCAGCCACGTAGG	GACCCATTCGAGCAGCCACGT	regulatory-gDNA sequences	CTCF_5	DHS_10	-	1204	1148	3013	1697	2626	2707	2249	2367	1252.45	1605.15	2203.88	2629.02	0.961319	1.87708	1.19154	0.85545
-	chr6	30569700	CCCATTCGAGCAGCCACGTAGGC	GCCCATTCGAGCAGCCACGTA	ineffective-gDNA	CTCF_5	DHS_10	-	2538	3190	1961	3187	3843	4639	4644	4156	3810	3140.36	3726	4530.73	0.666142	0.62445	1.0314	1.025
-	chr6	30569701	CCATTCGAGCAGCCACGTAGGCT	GCCATTCGAGCAGCCACGTAG	ineffective-gDNA	CTCF_5	DHS_10	-	1313	1565	962	1894	2463	3574	4097	3427	1780.78	1810.15	2887.44	3755.98	0.737317	0.531447	0.853005	1.09079
-	chr6	30571234	ACATAGCCTGCCGATATGGC	GACATAGCCTGCCGATATGGC	control-gDNA sequences	-	-	-	473	674	674	1235	1916	1848	2267	1693	659.663	1121.94	1525.8	1912.17	0.717033	0.600743	1.25573	1.18556
-	chr6	30571238	GCAAACATAGCCTGCCGATA	GCAAACATAGCCTGCCGATA	control-gDNA sequences	-	-	-	582	164	123	148	118	410	325	105	175.031	140.288	322.745	135.359	3.32512	0.87677	0.365614	2.40103
+	chr6	30572763	CCAGACTAGGATCTTAACGG	GCCAGACTAGGATCTTAACGG	control-gDNA sequences	-	-	-	0	0	0	0	0	0	0	0	2.64249	1.25247	5.82205	6.00696	0	0	0	0
-	chr6	30572765	CCCCGTTAAGATCCTAGTCT	GCCCCGTTAAGATCCTAGTCT	control-gDNA sequences	-	-	-	0	0	0	0	0	0	0	0	2.64249	1.25247	5.82205	6.00696	0	0	0	0
-	chr6	30576763	CCACCACTAACTCGGCGGCT	GCCACCACTAACTCGGCGGCT	control-gDNA sequences	-	-	-	2958	2818	1685	2620	4540	5361	3869	5837	3349.56	2560.29	4293.81	6316.34	0.8831	0.658128	1.05734	0.612539
-	chr6	30585737	ATAAGAAACCACGTTTACGC	GATAAGAAACCACGTTTACGC	control-gDNA sequences	-	-	-	20	19	0	0	0	56	0	71	25.2399	1.25247	58.0095	95.1329	0.792395	0	0	0
+	chr6	30590982	GAAATACGGCTACTCCTCAAAGG	GAAATACGGCTACTCCTCAA	regulatory-gDNA sequences	DHS_11	enhancer_1	-	0	0	0	0	0	0	0	0	2.64249	1.25247	5.82205	6.00696	0	0	0	0
+	chr6	30590986	TACGGCTACTCCTCAAAGGAAGG	GTACGGCTACTCCTCAAAGGA	regulatory-gDNA sequences	DHS_11	enhancer_1	-	0	0	0	0	0	0	0	0	2.64249	1.25247	5.82205	6.00696	0	0	0	0
+	chr6	30590991	CTACTCCTCAAAGGAAGGCTAGG	GCTACTCCTCAAAGGAAGGCT	regulatory-gDNA sequences	DHS_11	enhancer_1	-	0	2	0	0	0	0	62	44	5.0887	1.25247	5.82205	62.0388	0	0	0	0.999374
-	chr6	30590996	CCTCAAAGGAAGGCTAGGAATTT	GCCTCAAAGGAAGGCTAGGAA	ineffective-gDNA	DHS_11	enhancer_1	-	0	0	0	0	0	0	0	0	2.64249	1.25247	5.82205	6.00696	0	0	0	0
-	chr6	30591031	CCCTAGTCGTAGTTCTTCACAGA	GCCCTAGTCGTAGTTCTTCAC	ineffective-gDNA	DHS_11	enhancer_1	-	0	0	0	0	0	0	0	0	2.64249	1.25247	5.82205	6.00696	0	0	0	0
-	chr6	30591032	CCTAGTCGTAGTTCTTCACAGAG	GCCTAGTCGTAGTTCTTCACA	ineffective-gDNA	DHS_11	enhancer_1	-	0	0	0	0	0	0	0	0	2.64249	1.25247	5.82205	6.00696	0	0	0	0
+	chr6	30591033	CTAGTCGTAGTTCTTCACAGAGG	GCTAGTCGTAGTTCTTCACAG	regulatory-gDNA sequences	DHS_11	enhancer_1	-	0	38	8	11	0	31	21	34	46.6199	14.1857	35.2828	49.5313	0	0.563946	0	0.423975
+	chr6	30591034	TAGTCGTAGTTCTTCACAGAGGG	GTAGTCGTAGTTCTTCACAGA	regulatory-gDNA sequences	DHS_11	enhancer_1	-	0	0	0	0	0	0	0	0	2.64249	1.25247	5.82205	6.00696	0	0	0	0
-	chr6	30591102	CCCCACAGAGCAAGACAAAAGAA	GCCCCACAGAGCAAGACAAAA	ineffective-gDNA	DHS_11	enhancer_1	-	0	0	0	0	0	0	0	0	2.64249	1.25247	5.82205	6.00696	0	0	0	0
-	chr6	30591103	CCCACAGAGCAAGACAAAAGAAG	GCCCACAGAGCAAGACAAAAG	ineffective-gDNA	DHS_11	enhancer_1	-	0	0	0	0	0	0	0	0	2.64249	1.25247	5.82205	6.00696	0	0	0	0
+	chr6	30591116	ACAAAAGAAGCCGGCAAGGATGG	GACAAAAGAAGCCGGCAAGGA	regulatory-gDNA sequences	DHS_11	enhancer_1	-	9	20	0	0	0	2	0	0	26.3954	1.25247	7.77071	6.00696	0.340969	0	0	0
+	chr6	30591122	GAAGCCGGCAAGGATGGCTCTGG	GAAGCCGGCAAGGATGGCTC	regulatory-gDNA sequences	DHS_11	enhancer_1	-	0	0	0	0	0	0	0	0	2.64249	1.25247	5.82205	6.00696	0	0	0	0
-	chr6	30591126	CCGGCAAGGATGGCTCTGGTCAG	GCCGGCAAGGATGGCTCTGGT	ineffective-gDNA	DHS_11	enhancer_1	-	65	97	0	0	401	180	23	81	105.979	1.25247	156.848	107.126	0.61333	0	2.55661	0.214701
-	chr6	30591278	CCCCGATCCCTACCAACCCACTG	GCCCCGATCCCTACCAACCCA	ineffective-gDNA	DHS_11	enhancer_1	-	0	0	0	0	0	0	0	0	2.64249	1.25247	5.82205	6.00696	0	0	0	0
-	chr6	30591279	CCCGATCCCTACCAACCCACTGC	GCCCGATCCCTACCAACCCAC	ineffective-gDNA	DHS_11	enhancer_1	-	15	24	0	0	70	31	31	25	30.991	1.25247	35.2828	38.1651	0.484012	0	1.98397	0.812261
-	chr6	30591280	CCGATCCCTACCAACCCACTGCA	GCCGATCCCTACCAACCCACT	ineffective-gDNA	DHS_11	enhancer_1	-	0	0	0	0	0	0	0	0	2.64249	1.25247	5.82205	6.00696	0	0	0	0
+	chr6	30591282	GATCCCTACCAACCCACTGCAGG	GATCCCTACCAACCCACTGC	regulatory-gDNA sequences	DHS_11	enhancer_1	-	0	0	0	0	0	0	76	88	2.64249	1.25247	5.82205	115.439	0	0	0	0.658355
-	chr6	30591285	CCCTACCAACCCACTGCAGGCAT	GCCCTACCAACCCACTGCAGG	ineffective-gDNA	DHS_11	enhancer_1	-	21	40	0	0	49	0	143	157	48.7715	1.25247	5.82205	194.097	0.430579	0	8.41629	0.736746
-	chr6	30591286	CCTACCAACCCACTGCAGGCATA	GCCTACCAACCCACTGCAGGC	ineffective-gDNA	DHS_11	enhancer_1	-	157	346	236	532	655	1302	706	787	351.263	464.093	1085.23	881.679	0.446958	0.508518	0.603556	0.800745
-	chr6	30591295	CCACTGCAGGCATATGAGCCCTA	GCCACTGCAGGCATATGAGCC	ineffective-gDNA	DHS_11	enhancer_1	-	157	475	683	818	656	892	1616	937	466.202	686.477	728.623	1061.07	0.336764	0.994935	0.900328	1.52299
+	chr6	30591303	GGCATATGAGCCCTAAAATCTGG	GGCATATGAGCCCTAAAATC	regulatory-gDNA sequences	DHS_11	enhancer_1	-	0	0	0	0	0	0	0	0	2.64249	1.25247	5.82205	6.00696	0	0	0	0
+	chr6	30591304	GCATATGAGCCCTAAAATCTGGG	GCATATGAGCCCTAAAATCT	regulatory-gDNA sequences	DHS_11	enhancer_1	-	0	0	0	0	0	0	0	0	2.64249	1.25247	5.82205	6.00696	0	0	0	0
+	chr6	30591309	TGAGCCCTAAAATCTGGGAAAGG	GTGAGCCCTAAAATCTGGGAA	regulatory-gDNA sequences	DHS_11	enhancer_1	-	0	0	0	0	0	0	0	0	2.64249	1.25247	5.82205	6.00696	0	0	0	0
-	chr6	30591313	CCCTAAAATCTGGGAAAGGCTTT	GCCCTAAAATCTGGGAAAGGC	ineffective-gDNA	DHS_11	enhancer_1	-	28	61	28	112	121	82	206	76	70.4252	110.501	80.5993	101.147	0.397585	0.253391	1.50125	2.03665
-	chr6	30591314	CCTAAAATCTGGGAAAGGCTTTT	GCCTAAAATCTGGGAAAGGCT	ineffective-gDNA	DHS_11	enhancer_1	-	58	114	149	252	104	133	176	425	123.154	229.268	121.648	462.596	0.470955	0.649894	0.854929	0.380462
+	chr6	30591323	TGGGAAAGGCTTTTTTCCCTAGG	GTGGGAAAGGCTTTTTTCCCT	regulatory-gDNA sequences	DHS_11	enhancer_1	-	0	0	0	0	0	0	0	0	2.64249	1.25247	5.82205	6.00696	0	0	0	0
+	chr6	30591324	GGGAAAGGCTTTTTTCCCTAGGG	GGGAAAGGCTTTTTTCCCTA	regulatory-gDNA sequences	DHS_11	enhancer_1	-	0	0	0	0	0	0	0	0	2.64249	1.25247	5.82205	6.00696	0	0	0	0
+	chr6	30591325	GGAAAGGCTTTTTTCCCTAGGGG	GGAAAGGCTTTTTTCCCTAG	regulatory-gDNA sequences	DHS_11	enhancer_1	-	0	0	0	0	0	0	0	0	2.64249	1.25247	5.82205	6.00696	0	0	0	0
-	chr6	30591339	CCCTAGGGGCCCTGGCCTCACAG	GCCCTAGGGGCCCTGGCCTCA	ineffective-gDNA	DHS_11	enhancer_1	-	0	0	0	0	0	0	0	0	2.64249	1.25247	5.82205	6.00696	0	0	0	0
-	chr6	30591340	CCTAGGGGCCCTGGCCTCACAGA	GCCTAGGGGCCCTGGCCTCAC	ineffective-gDNA	DHS_11	enhancer_1	-	0	0	0	0	0	0	0	0	2.64249	1.25247	5.82205	6.00696	0	0	0	0
-	chr6	30591348	CCCTGGCCTCACAGACTTGCCCA	GCCCTGGCCTCACAGACTTGC	ineffective-gDNA	DHS_11	enhancer_1	-	396	606	446	972	851	1790	830	876	589.226	845.325	1479.99	988.068	0.672068	0.527608	0.575003	0.840023
-	chr6	30591349	CCTGGCCTCACAGACTTGCCCAG	GCCTGGCCTCACAGACTTGCC	ineffective-gDNA	DHS_11	enhancer_1	-	4914	5923	2832	5256	8873	10385	10051	9674	7121.04	5215.05	8230.05	10387.9	0.690067	0.543044	1.07812	0.967568
+	chr6	30591350	CTGGCCTCACAGACTTGCCCAGG	GCTGGCCTCACAGACTTGCCC	regulatory-gDNA sequences	DHS_11	enhancer_1	-	821	535	489	1023	1214	1198	891	1175	521.022	899.054	995.991	1343.09	1.57575	0.543905	1.21889	0.663395
-	chr6	30591367	CCCAGGGGGGTAAATTCTCAGTG	GCCCAGGGGGGTAAATTCTCA	ineffective-gDNA	DHS_11	enhancer_1	-	0	0	0	0	0	0	0	0	2.64249	1.25247	5.82205	6.00696	0	0	0	0
+	chr6	30591376	GTAAATTCTCAGTGGCTCAGTGG	GTAAATTCTCAGTGGCTCAG	regulatory-gDNA sequences	DHS_11	enhancer_1	-	0	0	0	0	0	0	0	0	2.64249	1.25247	5.82205	6.00696	0	0	0	0
+	chr6	30591399	CACGTGCCTCACGTCCTCACCGG	GCACGTGCCTCACGTCCTCAC	regulatory-gDNA sequences	DHS_11	enhancer_1	-	5	14	0	0	0	0	0	0	19.4187	1.25247	5.82205	6.00696	0.257484	0	0	0
-	chr6	30591405	CCTCACGTCCTCACCGGCAGCCT	GCCTCACGTCCTCACCGGCAG	ineffective-gDNA	DHS_11	enhancer_1	-	27	39	0	0	0	0	70	18	47.6981	1.25247	5.82205	29.2498	0.566061	0	0	2.39318
-	chr6	30591413	CCTCACCGGCAGCCTAGATAGAT	GCCTCACCGGCAGCCTAGATA	ineffective-gDNA	DHS_11	enhancer_1	-	0	0	0	0	0	0	0	0	2.64249	1.25247	5.82205	6.00696	0	0	0	0
-	chr6	30591418	CCGGCAGCCTAGATAGATAGATA	GCCGGCAGCCTAGATAGATAG	ineffective-gDNA	DHS_11	enhancer_1	-	0	0	0	0	0	0	0	0	2.64249	1.25247	5.82205	6.00696	0	0	0	0
-	chr6	30591859	CCGTGCGAAAGGCTGTTTGAGAT	GCCGTGCGAAAGGCTGTTTGA	ineffective-gDNA	DHS_12	-	-	0	0	0	0	0	0	0	0	2.64249	1.25247	5.82205	6.00696	0	0	0	0
+	chr6	30591886	CGCAACAACTTCTCCCGCTCAGG	GCGCAACAACTTCTCCCGCTC	regulatory-gDNA sequences	DHS_12	-	-	0	0	0	0	1	0	0	0	2.64249	1.25247	5.82205	6.00696	0	0	0.171761	0
-	chr6	30591899	CCCGCTCAGGTTACCCTCAGAAA	GCCCGCTCAGGTTACCCTCAG	ineffective-gDNA	DHS_12	-	-	0	0	0	0	0	0	0	0	2.64249	1.25247	5.82205	6.00696	0	0	0	0
-	chr6	30591900	CCGCTCAGGTTACCCTCAGAAAG	GCCGCTCAGGTTACCCTCAGA	ineffective-gDNA	DHS_12	-	-	0	0	0	0	0	0	0	0	2.64249	1.25247	5.82205	6.00696	0	0	0	0
+	chr6	30591907	GGTTACCCTCAGAAAGGCTATGG	GGTTACCCTCAGAAAGGCTA	regulatory-gDNA sequences	DHS_12	-	-	0	0	0	0	0	0	0	0	2.64249	1.25247	5.82205	6.00696	0	0	0	0
-	chr6	30591912	CCCTCAGAAAGGCTATGGACCCC	GCCCTCAGAAAGGCTATGGAC	ineffective-gDNA	DHS_12	-	-	0	0	0	0	0	0	0	0	2.64249	1.25247	5.82205	6.00696	0	0	0	0
-	chr6	30591913	CCTCAGAAAGGCTATGGACCCCG	GCCTCAGAAAGGCTATGGACC	ineffective-gDNA	DHS_12	-	-	11	22	0	0	58	39	108	124	28.6982	1.25247	42.6468	157.188	0.383299	0	1.36001	0.687074
+	chr6	30591914	CTCAGAAAGGCTATGGACCCCGG	GCTCAGAAAGGCTATGGACCC	regulatory-gDNA sequences	DHS_12	-	-	96	147	2	8	409	147	113	295	157.265	10.7267	132.333	334.308	0.610435	0.186451	3.09068	0.338012
-	chr6	30591931	CCCCGGACTCCGCCCCAGATTGC	GCCCCGGACTCCGCCCCAGAT	ineffective-gDNA	DHS_12	-	-	19	40	21	29	112	0	109	106	48.7715	33.9591	5.82205	136.519	0.389572	0.61839	19.2372	0.798425
-	chr6	30591932	CCCGGACTCCGCCCCAGATTGCA	GCCCGGACTCCGCCCCAGATT	ineffective-gDNA	DHS_12	-	-	123	154	353	654	564	210	350	300	164.575	551.731	178.62	339.121	0.747382	0.639805	3.15754	1.03208
-	chr6	30591933	CCGGACTCCGCCCCAGATTGCAT	GCCGGACTCCGCCCCAGATTG	ineffective-gDNA	DHS_12	-	-	237	419	155	350	669	913	530	889	416.25	322.386	747.02	1003.63	0.569369	0.48079	0.895559	0.528084
-	chr6	30591940	CCGCCCCAGATTGCATAACAACT	GCCGCCCCAGATTGCATAACA	ineffective-gDNA	DHS_12	-	-	32	23	21	50	117	125	32	37	29.8458	55.1854	115.445	53.2967	1.07218	0.380536	1.01347	0.600413
-	chr6	30591943	CCCCAGATTGCATAACAACTGAG	GCCCCAGATTGCATAACAACT	ineffective-gDNA	DHS_12	-	-	0	0	0	0	0	0	0	0	2.64249	1.25247	5.82205	6.00696	0	0	0	0
+	chr6	30591944	CCCAGATTGCATAACAACTGAGG	GCCCAGATTGCATAACAACTG	regulatory-gDNA sequences	DHS_12	-	-	0	0	0	0	0	0	0	0	2.64249	1.25247	5.82205	6.00696	0	0	0	0
+	chr6	30591945	CCAGATTGCATAACAACTGAGGG	GCCAGATTGCATAACAACTGA	regulatory-gDNA sequences	DHS_12	-	-	0	0	0	0	0	0	0	0	2.64249	1.25247	5.82205	6.00696	0	0	0	0
+	chr6	30591946	CAGATTGCATAACAACTGAGGGG	GCAGATTGCATAACAACTGAG	regulatory-gDNA sequences	DHS_12	-	-	0	0	0	0	0	0	0	0	2.64249	1.25247	5.82205	6.00696	0	0	0	0
+	chr6	30591949	ATTGCATAACAACTGAGGGGTGG	GATTGCATAACAACTGAGGGG	regulatory-gDNA sequences	DHS_12	-	-	68	53	13	60	130	167	9	119	62.347	64.7205	147.285	151.487	1.09067	0.200864	0.882642	0.0594112
+	chr6	30591950	TTGCATAACAACTGAGGGGTGGG	GTTGCATAACAACTGAGGGGT	regulatory-gDNA sequences	DHS_12	-	-	14	50	113	311	0	148	159	110	59.27	286.778	133.089	141.147	0.236207	0.394033	0	1.12649
+	chr6	30591968	GTGGGTCCCTATTTCCTCTCTGG	GTGGGTCCCTATTTCCTCTC	regulatory-gDNA sequences	DHS_12	-	-	26	43	6	6	117	100	37	30	51.9644	8.39278	95.5259	44.4927	0.500343	0.7149	1.2248	0.831597
+	chr6	30591969	TGGGTCCCTATTTCCTCTCTGGG	GTGGGTCCCTATTTCCTCTCT	regulatory-gDNA sequences	DHS_12	-	-	0	0	0	0	0	0	0	0	2.64249	1.25247	5.82205	6.00696	0	0	0	0
-	chr6	30591982	CCTCTCTGGGATCTGTAGCCAAT	GCCTCTCTGGGATCTGTAGCC	ineffective-gDNA	DHS_12	-	-	1152	875	520	1138	974	1887	1671	1682	904.84	1020.05	1556.61	1900.47	1.27315	0.509778	0.625719	0.879257
+	chr6	30591993	TCTGTAGCCAATCATTCACGAGG	GTCTGTAGCCAATCATTCACG	regulatory-gDNA sequences	DHS_12	-	-	0	0	0	0	0	0	0	0	2.64249	1.25247	5.82205	6.00696	0	0	0	0
-	chr6	30592000	CCAATCATTCACGAGGTAAACAG	GCCAATCATTCACGAGGTAAA	ineffective-gDNA	DHS_12	-	-	0	0	0	0	0	0	0	0	2.64249	1.25247	5.82205	6.00696	0	0	0	0
-	chr6	30592028	CCGAGTTTCTCTCAGCCGAGAAC	GCCGAGTTTCTCTCAGCCGAG	ineffective-gDNA	DHS_12	-	-	9	28	0	0	0	0	246	75	35.5494	1.25247	5.82205	99.9467	0.253169	0	0	2.46131
+	chr6	30592112	GGGCGACCCCTGAAGCGTAG	GGGCGACCCCTGAAGCGTAG	control-gDNA sequences	-	-	-	32	27	0	0	141	174	0	0	34.4129	1.25247	152.447	6.00696	0.929883	0	0.924909	0
+	chr6	30592119	CCCTGAAGCGTAGAGGAACC	GCCCTGAAGCGTAGAGGAACC	control-gDNA sequences	-	-	-	0	0	0	0	0	0	0	0	2.64249	1.25247	5.82205	6.00696	0	0	0	0
+	chr6	30592278	GCGGCTCTGTCCCTGTTTCCTGG	GCGGCTCTGTCCCTGTTTCC	regulatory-gDNA sequences	DHS_13	-	-	4420	7457	6124	7558	10018	11103	10670	10502	8926.69	7448.59	8790.56	11265.8	0.495145	0.822169	1.13963	0.947111
+	chr6	30592283	TCTGTCCCTGTTTCCTGGATAGG	GTCTGTCCCTGTTTCCTGGAT	regulatory-gDNA sequences	DHS_13	-	-	33	68	117	227	105	213	277	499	77.38	206.554	180.781	544.292	0.426467	0.566438	0.580812	0.508918
-	chr6	30592288	CCCTGTTTCCTGGATAGGAGACT	GCCCTGTTTCCTGGATAGGAG	ineffective-gDNA	DHS_13	-	-	0	0	0	0	0	0	0	0	2.64249	1.25247	5.82205	6.00696	0	0	0	0
-	chr6	30592289	CCTGTTTCCTGGATAGGAGACTA	GCCTGTTTCCTGGATAGGAGA	ineffective-gDNA	DHS_13	-	-	0	0	0	0	0	0	0	0	2.64249	1.25247	5.82205	6.00696	0	0	0	0
-	chr6	30592296	CCTGGATAGGAGACTACGTCTGT	GCCTGGATAGGAGACTACGTC	ineffective-gDNA	DHS_13	-	-	110	102	53	69	126	144	180	152	110.993	73.0426	130.06	188.582	0.991056	0.725604	0.968781	0.954491
+	chr6	30592311	ACGTCTGTATCTTGTATCACAGG	GACGTCTGTATCTTGTATCAC	regulatory-gDNA sequences	DHS_13	-	-	7	19	0	0	0	75	73	0	25.2399	1.25247	74.6438	6.00696	0.277338	0	0	12.1526
+	chr6	30592314	TCTGTATCTTGTATCACAGGAGG	GTCTGTATCTTGTATCACAGG	regulatory-gDNA sequences	DHS_13	-	-	0	0	0	0	0	0	0	0	2.64249	1.25247	5.82205	6.00696	0	0	0	0
+	chr6	30592335	GGCACCTTCTTCCTGTTTCCTGG	GGCACCTTCTTCCTGTTTCC	regulatory-gDNA sequences	DHS_13	-	-	2631	2945	2505	3722	4643	5223	4321	4416	3507.02	3683.1	4185.32	4806.99	0.750209	0.680133	1.10935	0.898899
-	chr6	30592346	CCTGTTTCCTGGCACAGACTTGT	GCCTGTTTCCTGGCACAGACT	ineffective-gDNA	DHS_13	-	-	0	6	0	0	0	48	25	33	9.92841	1.25247	50.8263	48.2736	0	0	0	0.517882
-	chr6	30592353	CCTGGCACAGACTTGTAAGTGAA	GCCTGGCACAGACTTGTAAGT	ineffective-gDNA	DHS_13	-	-	0	26	92	182	100	0	0	33	33.2744	168.218	5.82205	48.2736	0	0.546908	17.1761	0
-	chr6	30592379	CCTGCCCGCCTCCGCCCACAGCG	GCCTGCCCGCCTCCGCCCACA	ineffective-gDNA	DHS_13	-	-	217	504	310	661	614	820	1055	1138	492.46	556.916	665.691	1299.78	0.440645	0.556637	0.922351	0.811674
-	chr6	30592383	CCCGCCTCCGCCCACAGCGTAAG	GCCCGCCTCCGCCCACAGCGT	ineffective-gDNA	DHS_13	-	-	107	142	144	424	303	475	128	237	152.054	383.785	372.703	277.721	0.703699	0.37521	0.812979	0.460894
-	chr6	30592384	CCGCCTCCGCCCACAGCGTAAGC	GCCGCCTCCGCCCACAGCGTA	ineffective-gDNA	DHS_13	-	-	435	325	144	218	515	514	887	289	332.323	198.67	404.26	328.525	1.30897	0.724821	1.27393	2.69994
-	chr6	30592387	CCTCCGCCCACAGCGTAAGCCGC	GCCTCCGCCCACAGCGTAAGC	ineffective-gDNA	DHS_13	-	-	0	0	0	0	0	0	0	0	2.64249	1.25247	5.82205	6.00696	0	0	0	0
-	chr6	30592390	CCGCCCACAGCGTAAGCCGCGCT	GCCGCCCACAGCGTAAGCCGC	ineffective-gDNA	DHS_13	-	-	0	0	0	0	0	0	0	0	2.64249	1.25247	5.82205	6.00696	0	0	0	0
+	chr6	30592392	GCCCACAGCGTAAGCCGCGCTGG	GCCCACAGCGTAAGCCGCGC	regulatory-gDNA sequences	DHS_13	-	-	0	5	0	0	30	19	0	0	8.72483	1.25247	24.0608	6.00696	0	0	1.24684	0
-	chr6	30592393	CCCACAGCGTAAGCCGCGCTGGA	GCCCACAGCGTAAGCCGCGCT	ineffective-gDNA	DHS_13	-	-	134	203	83	202	161	163	302	393	215.596	184.954	144.32	429.79	0.621534	0.448761	1.11558	0.702669
-	chr6	30592394	CCACAGCGTAAGCCGCGCTGGAA	GCCACAGCGTAAGCCGCGCTG	ineffective-gDNA	DHS_13	-	-	448	495	213	328	798	818	930	828	484.27	302.618	663.947	930.646	0.925105	0.703857	1.2019	0.999306
-	chr6	30592406	CCGCGCTGGAACAGCTCACTTAT	GCCGCGCTGGAACAGCTCACT	ineffective-gDNA	DHS_13	-	-	0	0	0	0	0	0	0	0	2.64249	1.25247	5.82205	6.00696	0	0	0	0
-	chr6	30592431	CCCCAGATGTATGTGGAGTAACC	GCCCCAGATGTATGTGGAGTA	ineffective-gDNA	DHS_13	-	-	54	126	69	202	81	460	45	112	135.466	184.954	360.91	143.453	0.398623	0.373066	0.224433	0.313692
-	chr6	30592432	CCCAGATGTATGTGGAGTAACCG	GCCCAGATGTATGTGGAGTAA	ineffective-gDNA	DHS_13	-	-	0	0	0	0	0	0	0	0	2.64249	1.25247	5.82205	6.00696	0	0	0	0
-	chr6	30592433	CCAGATGTATGTGGAGTAACCGC	GCCAGATGTATGTGGAGTAAC	ineffective-gDNA	DHS_13	-	-	100	195	67	163	299	723	553	411	207.339	152.575	581.496	448.082	0.482301	0.439129	0.514191	1.23415
+	chr6	30592447	AGTAACCGCCTTCAGTTTCCTGG	GAGTAACCGCCTTCAGTTTCC	regulatory-gDNA sequences	DHS_13	-	-	1671	3100	3388	3973	5360	5755	6337	5593	3698.82	3936.22	4603.43	6057.23	0.451766	0.860725	1.16435	1.04619
+	chr6	30595216	AGTGGGGATCACGTGCGTAG	GAGTGGGGATCACGTGCGTAG	control-gDNA sequences	-	-	-	6	41	21	35	91	312	50	126	49.8403	40.2085	251.434	159.461	0.120385	0.522278	0.361924	0.313557
-	chr6	30604074	GCGATTAGTCCCCACTTCTC	GCGATTAGTCCCCACTTCTC	control-gDNA sequences	-	-	-	0	0	0	0	0	0	0	0	2.64249	1.25247	5.82205	6.00696	0	0	0	0
+	chr6	30605014	CATAACCCCTGTTGAGGTCC	GCATAACCCCTGTTGAGGTCC	control-gDNA sequences	-	-	-	2016	2130	1230	1571	4672	5047	3984	4089	2491.62	1473.71	4046.93	4459.54	0.809111	0.834628	1.15445	0.893366
-	chr6	30608194	CCCGGCCCATCCCACCGCCTTGC	GCCCGGCCCATCCCACCGCCT	ineffective-gDNA	CTCF_6	-	-	322	251	121	239	225	314	227	334	263.6	217.294	252.862	371.85	1.22155	0.556848	0.889812	0.61046
-	chr6	30608200	CCATCCCACCGCCTTGCTGTGGC	GCCATCCCACCGCCTTGCTGT	ineffective-gDNA	CTCF_6	-	-	77	250	232	275	411	776	600	588	262.636	251.478	627.394	646.797	0.293181	0.922545	0.65509	0.927648
+	chr6	30608203	TCCCACCGCCTTGCTGTGGCAGG	GTCCCACCGCCTTGCTGTGGC	regulatory-gDNA sequences	CTCF_6	-	-	899	800	447	707	1567	1534	1350	1102	809.105	591.922	1277.47	1257.4	1.1111	0.755167	1.22664	1.07364
+	chr6	30608204	CCCACCGCCTTGCTGTGGCAGGG	GCCCACCGCCTTGCTGTGGCA	regulatory-gDNA sequences	CTCF_6	-	-	75	161	98	180	367	599	774	531	171.894	166.563	475.472	580.909	0.436316	0.588366	0.771865	1.33239
-	chr6	30608205	CCACCGCCTTGCTGTGGCAGGGA	GCCACCGCCTTGCTGTGGCAG	ineffective-gDNA	CTCF_6	-	-	127	298	350	659	463	414	449	408	307.668	555.431	325.741	445.007	0.412783	0.630141	1.42138	1.00897
-	chr6	30608208	CCGCCTTGCTGTGGCAGGGAGAG	GCCGCCTTGCTGTGGCAGGGA	ineffective-gDNA	CTCF_6	-	-	158	81	121	221	221	89	110	55	90.1603	201.283	86.4681	75.6493	1.75243	0.601144	2.55586	1.45408
-	chr6	30608263	CCAATCCCATTATGCCCCCATGA	GCCAATCCCATTATGCCCCCA	ineffective-gDNA	CTCF_6	-	-	100	149	51	124	85	436	536	309	159.352	120.522	342.387	347.778	0.627542	0.423158	0.248257	1.54121
-	chr6	30608268	CCCATTATGCCCCCATGACTTTA	GCCCATTATGCCCCCATGACT	ineffective-gDNA	CTCF_6	-	-	0	0	0	0	0	0	0	0	2.64249	1.25247	5.82205	6.00696	0	0	0	0
-	chr6	30608269	CCATTATGCCCCCATGACTTTAT	GCCATTATGCCCCCATGACTT	ineffective-gDNA	CTCF_6	-	-	21	36	10	6	0	30	47	105	44.4487	8.39278	34.3559	135.359	0.472455	1.1915	0	0.347226
-	chr6	30608278	CCCCATGACTTTATCCAAACCTC	GCCCCATGACTTTATCCAAAC	ineffective-gDNA	CTCF_6	-	-	0	0	0	0	0	0	0	0	2.64249	1.25247	5.82205	6.00696	0	0	0	0
-	chr6	30608279	CCCATGACTTTATCCAAACCTCA	GCCCATGACTTTATCCAAACC	ineffective-gDNA	CTCF_6	-	-	37	87	48	17	34	99	121	31	96.0588	20.9584	94.7104	45.7543	0.385181	2.29025	0.358989	2.64456
-	chr6	30608280	CCATGACTTTATCCAAACCTCAT	GCCATGACTTTATCCAAACCT	ineffective-gDNA	CTCF_6	-	-	0	0	0	0	0	0	0	0	2.64249	1.25247	5.82205	6.00696	0	0	0	0
+	chr6	30608291	TCCAAACCTCATTATAGCCCAGG	GTCCAAACCTCATTATAGCCC	regulatory-gDNA sequences	CTCF_6	-	-	1	1	70	217	0	0	0	0	3.86787	197.802	5.82205	6.00696	0.25854	0.35389	0	0
-	chr6	30608292	CCAAACCTCATTATAGCCCAGGC	GCCAAACCTCATTATAGCCCA	ineffective-gDNA	CTCF_6	-	-	0	0	0	0	0	0	0	0	2.64249	1.25247	5.82205	6.00696	0	0	0	0
-	chr6	30608297	CCTCATTATAGCCCAGGCCCCAC	GCCTCATTATAGCCCAGGCCC	ineffective-gDNA	CTCF_6	-	-	647	785	390	654	1148	1552	1781	1490	789.945	551.731	1291.87	1696.22	0.819044	0.706866	0.888636	1.04998
-	chr6	30608420	CCCTCTAGTGTGCAAAAAAGTAA	GCCCTCTAGTGTGCAAAAAAG	ineffective-gDNA	CTCF_6	-	-	0	0	0	0	0	0	0	0	2.64249	1.25247	5.82205	6.00696	0	0	0	0
-	chr6	30608421	CCTCTAGTGTGCAAAAAAGTAAG	GCCTCTAGTGTGCAAAAAAGT	ineffective-gDNA	CTCF_6	-	-	0	0	0	0	0	0	0	0	2.64249	1.25247	5.82205	6.00696	0	0	0	0
+	chr6	30608436	AAAGTAAGTACAAGAATTTTTGG	GAAAGTAAGTACAAGAATTTT	regulatory-gDNA sequences	CTCF_6	-	-	0	0	0	0	0	0	0	0	2.64249	1.25247	5.82205	6.00696	0	0	0	0
+	chr6	30608437	AAGTAAGTACAAGAATTTTTGGG	GAAGTAAGTACAAGAATTTTT	regulatory-gDNA sequences	CTCF_6	-	-	0	0	0	0	0	0	0	0	2.64249	1.25247	5.82205	6.00696	0	0	0	0
+	chr6	30608438	AGTAAGTACAAGAATTTTTGGGG	GAGTAAGTACAAGAATTTTTG	regulatory-gDNA sequences	CTCF_6	-	-	0	0	0	0	0	0	0	0	2.64249	1.25247	5.82205	6.00696	0	0	0	0
-	chr6	30608523	CCAGGCATGGTACAGTAGCATAA	GCCAGGCATGGTACAGTAGCA	ineffective-gDNA	CTCF_6	-	-	0	5	0	0	35	1	0	11	8.72483	1.25247	6.79725	20.2665	0	0	5.14914	0
+	chr6	30609398	GACGTGATTGGCGGCATTTT	GACGTGATTGGCGGCATTTT	control-gDNA sequences	-	-	-	1115	2098	1498	2395	1581	3882	3648	3681	2451.52	2328.71	3130.08	4025.95	0.45482	0.643276	0.505099	0.906121
+	chr6	30617281	GTAGCAACTCCATGATTCCAAGG	GTAGCAACTCCATGATTCCA	regulatory-gDNA sequences	CTCF_7	DHS_14	-	0	0	0	0	0	0	0	18	2.64249	1.25247	5.82205	29.2498	0	0	0	0
+	chr6	30617294	GATTCCAAGGTAATTTAAACAGG	GATTCCAAGGTAATTTAAAC	regulatory-gDNA sequences	CTCF_7	DHS_14	-	0	0	0	0	0	0	0	0	2.64249	1.25247	5.82205	6.00696	0	0	0	0
-	chr6	30617354	CCTCTCAGCCTGCAGTGATGCTA	GCCTCTCAGCCTGCAGTGATG	ineffective-gDNA	CTCF_7	DHS_14	-	26193	32992	24709	37214	49943	61542	63833	62608	35076.2	30952	47317.1	66548.2	0.746746	0.7983	1.0555	0.959199
-	chr6	30617362	CCTGCAGTGATGCTACGACACCG	GCCTGCAGTGATGCTACGACA	ineffective-gDNA	CTCF_7	DHS_14	-	0	0	0	0	0	0	0	0	2.64249	1.25247	5.82205	6.00696	0	0	0	0
+	chr6	30617363	CTGCAGTGATGCTACGACACCGG	GCTGCAGTGATGCTACGACAC	regulatory-gDNA sequences	CTCF_7	DHS_14	-	6	28	89	2	0	41	0	0	35.5494	3.6564	44.4738	6.00696	0.168779	24.3409	0	0
+	chr6	30617370	GATGCTACGACACCGGCAGATGG	GATGCTACGACACCGGCAGA	regulatory-gDNA sequences	CTCF_7	DHS_14	-	203	223	91	111	168	557	351	307	235.973	109.66	440.111	345.854	0.860268	0.829839	0.381722	1.01488
-	chr6	30617382	CCGGCAGATGGCGCTGCAAAGCT	GCCGGCAGATGGCGCTGCAAA	ineffective-gDNA	CTCF_7	DHS_14	-	0	0	0	0	0	0	0	0	2.64249	1.25247	5.82205	6.00696	0	0	0	0
+	chr6	30617397	GCAAAGCTTCTCAAATGCAGCGG	GCAAAGCTTCTCAAATGCAG	regulatory-gDNA sequences	CTCF_7	DHS_14	-	0	0	0	0	0	0	0	0	2.64249	1.25247	5.82205	6.00696	0	0	0	0
+	chr6	30617398	CAAAGCTTCTCAAATGCAGCGGG	GCAAAGCTTCTCAAATGCAGC	regulatory-gDNA sequences	CTCF_7	DHS_14	-	0	0	0	0	0	0	0	0	2.64249	1.25247	5.82205	6.00696	0	0	0	0
+	chr6	30617416	GCGGGAAGTCCATTTACCAACGG	GCGGGAAGTCCATTTACCAA	regulatory-gDNA sequences	CTCF_7	DHS_14	-	0	0	0	0	0	0	0	0	2.64249	1.25247	5.82205	6.00696	0	0	0	0
-	chr6	30617425	CCATTTACCAACGGCTGTTGCGA	GCCATTTACCAACGGCTGTTG	ineffective-gDNA	CTCF_7	DHS_14	-	1222	905	951	1648	1553	1918	2274	1736	943.106	1554.07	1581.09	1957.91	1.29572	0.611943	0.982233	1.16144
-	chr6	30617432	CCAACGGCTGTTGCGATCTCTTA	GCCAACGGCTGTTGCGATCTC	ineffective-gDNA	CTCF_7	DHS_14	-	247	553	531	534	686	857	768	1363	537.903	465.525	697.998	1557.87	0.459191	1.14065	0.982811	0.49298
-	chr6	30617562	CCGTATCAGTGCGAACCAGCTGA	GCCGTATCAGTGCGAACCAGC	ineffective-gDNA	DHS_15	-	-	0	0	0	0	0	0	0	0	2.64249	1.25247	5.82205	6.00696	0	0	0	0
-	chr6	30617577	CCAGCTGAATGTCAGCGCTGTTC	GCCAGCTGAATGTCAGCGCTG	ineffective-gDNA	DHS_15	-	-	403	395	179	405	546	690	479	438	394.955	368.673	553.073	476.33	1.02037	0.485525	0.987211	1.00561
-	chr6	30617599	CCCTCCTGTGACAGAAGCCACCG	GCCCTCCTGTGACAGAAGCCA	ineffective-gDNA	DHS_15	-	-	70	141	71	242	168	574	287	401	151.013	220.024	454.385	437.873	0.463537	0.322691	0.36973	0.655441
-	chr6	30617600	CCTCCTGTGACAGAAGCCACCGG	GCCTCCTGTGACAGAAGCCAC	ineffective-gDNA	DHS_15	-	-	21	37	17	32	246	328	221	291	45.5368	37.1036	262.88	330.454	0.461166	0.458176	0.935789	0.668777
+	chr6	30617614	AGCCACCGGCGCCTGCCTGAGGG	GAGCCACCGGCGCCTGCCTGA	regulatory-gDNA sequences	DHS_15	-	-	9	21	17	34	12	157	150	86	27.5481	39.1779	139.85	113.071	0.326702	0.433919	0.0858061	1.3266
-	chr6	30617616	CCACCGGCGCCTGCCTGAGGGCA	GCCACCGGCGCCTGCCTGAGG	ineffective-gDNA	DHS_15	-	-	60	146	19	35	219	248	62	161	156.222	40.2085	205.85	198.49	0.384069	0.472537	1.06388	0.312359
-	chr6	30617619	CCGGCGCCTGCCTGAGGGCACTC	GCCGGCGCCTGCCTGAGGGCA	ineffective-gDNA	DHS_15	-	-	0	0	0	0	28	16	37	36	2.64249	1.25247	21.2205	52.0428	0	0	1.31948	0.710953
-	chr6	30617625	CCTGCCTGAGGGCACTCCCCTCA	GCCTGCCTGAGGGCACTCCCC	ineffective-gDNA	DHS_15	-	-	307	710	818	1214	817	1485	1302	1314	699.579	1099.9	1237.86	1502.89	0.438835	0.743706	0.660012	0.86633
-	chr6	30617641	CCCCTCACTGGGACTCTCAGTAC	GCCCCTCACTGGGACTCTCAG	ineffective-gDNA	DHS_15	-	-	0	0	0	0	0	0	0	0	2.64249	1.25247	5.82205	6.00696	0	0	0	0
-	chr6	30617642	CCCTCACTGGGACTCTCAGTACC	GCCCTCACTGGGACTCTCAGT	ineffective-gDNA	DHS_15	-	-	121	244	81	97	336	380	512	633	256.813	97.76	300.536	699.339	0.471159	0.82856	1.118	0.732119
-	chr6	30617643	CCTCACTGGGACTCTCAGTACCA	GCCTCACTGGGACTCTCAGTA	ineffective-gDNA	DHS_15	-	-	0	0	0	0	0	0	0	0	2.64249	1.25247	5.82205	6.00696	0	0	0	0
-	chr6	30617663	CCACGCCCACCTGTCCCCAAGGT	GCCACGCCCACCTGTCCCCAA	ineffective-gDNA	DHS_15	-	-	2137	185	22	62	47	295	223	129	196.959	66.5898	239.313	162.86	10.85	0.330381	0.196396	1.36927
-	chr6	30617668	CCCACCTGTCCCCAAGGTTTGTT	GCCCACCTGTCCCCAAGGTTT	ineffective-gDNA	DHS_15	-	-	463	699	346	792	602	922	1755	1796	687.166	662.704	754.908	2021.73	0.673782	0.522103	0.797448	0.868067
-	chr6	30617669	CCACCTGTCCCCAAGGTTTGTTT	GCCACCTGTCCCCAAGGTTTG	ineffective-gDNA	DHS_15	-	-	2863	4332	2103	4176	4649	6858	6887	6424	5208.66	4140.22	5469.36	6939.59	0.549662	0.507944	0.850008	0.992422
-	chr6	30617672	CCTGTCCCCAAGGTTTGTTTCAT	GCCTGTCCCCAAGGTTTGTTT	ineffective-gDNA	DHS_15	-	-	10	21	0	0	164	31	24	0	27.5481	1.25247	35.2828	6.00696	0.363002	0	4.64815	3.99537
-	chr6	30617677	CCCCAAGGTTTGTTTCATCACTA	GCCCCAAGGTTTGTTTCATCA	ineffective-gDNA	DHS_15	-	-	0	0	0	0	0	0	0	0	2.64249	1.25247	5.82205	6.00696	0	0	0	0
-	chr6	30617678	CCCAAGGTTTGTTTCATCACTAA	GCCCAAGGTTTGTTTCATCAC	ineffective-gDNA	DHS_15	-	-	0	12	0	0	0	0	0	0	17.0678	1.25247	5.82205	6.00696	0	0	0	0
-	chr6	30617679	CCAAGGTTTGTTTCATCACTAAG	GCCAAGGTTTGTTTCATCACT	ineffective-gDNA	DHS_15	-	-	0	0	0	0	0	0	0	0	2.64249	1.25247	5.82205	6.00696	0	0	0	0
-	chr6	30617704	CCACCTTCCAGCATTTTCACCTT	GCCACCTTCCAGCATTTTCAC	ineffective-gDNA	DHS_15	-	-	51	187	115	361	109	420	714	427	199.039	331.983	330.252	464.692	0.256231	0.346404	0.330051	1.5365
-	chr6	30618020	CCCATCAGCAGCGTTCCACGCCG	GCCCATCAGCAGCGTTCCACG	ineffective-gDNA	DHS_16	-	-	270	447	252	265	798	1203	726	846	441.143	241.647	1000.31	952.171	0.612047	1.04284	0.797751	0.762468
-	chr6	30618021	CCATCAGCAGCGTTCCACGCCGC	GCCATCAGCAGCGTTCCACGC	ineffective-gDNA	DHS_16	-	-	0	0	0	0	0	0	0	0	2.64249	1.25247	5.82205	6.00696	0	0	0	0
-	chr6	30618060	CCTCCCCTAGCTTCATCACACCA	GCCTCCCCTAGCTTCATCACA	ineffective-gDNA	DHS_16	-	-	0	0	0	0	0	0	0	0	2.64249	1.25247	5.82205	6.00696	0	0	0	0
-	chr6	30618064	CCCTAGCTTCATCACACCACGTT	GCCCTAGCTTCATCACACCAC	ineffective-gDNA	DHS_16	-	-	0	0	0	0	0	0	0	0	2.64249	1.25247	5.82205	6.00696	0	0	0	0
-	chr6	30618065	CCTAGCTTCATCACACCACGTTA	GCCTAGCTTCATCACACCACG	ineffective-gDNA	DHS_16	-	-	23	40	70	113	211	192	201	89	48.7715	111.341	165.596	116.622	0.471587	0.628697	1.27418	1.72352
+	chr6	30618070	CTTCATCACACCACGTTACTAGG	GCTTCATCACACCACGTTACT	regulatory-gDNA sequences	DHS_16	-	-	0	0	0	0	0	0	0	0	2.64249	1.25247	5.82205	6.00696	0	0	0	0
-	chr6	30618080	CCACGTTACTAGGTTTTTCCTGT	GCCACGTTACTAGGTTTTTCC	ineffective-gDNA	DHS_16	-	-	56	91	57	46	0	65	121	93	100.009	51.2757	65.977	121.337	0.559947	1.11164	0	0.997221
-	chr6	30618153	CCTCAGCCTTCTCTGCTCCCCAC	GCCTCAGCCTTCTCTGCTCCC	ineffective-gDNA	DHS_16	-	-	400	785	913	1443	1003	1531	2549	1478	789.945	1339.92	1275.06	1683.43	0.506364	0.681385	0.786628	1.51417
-	chr6	30618170	CCCCACACCTATATGTTGATGAT	GCCCCACACCTATATGTTGAT	ineffective-gDNA	DHS_16	-	-	19	25	0	13	82	29	0	0	32.1338	16.4645	33.4275	6.00696	0.591278	0	2.45307	0
-	chr6	30618171	CCCACACCTATATGTTGATGATG	GCCCACACCTATATGTTGATG	ineffective-gDNA	DHS_16	-	-	162	324	242	560	671	661	1431	706	331.417	484.068	528.211	785.372	0.488811	0.49993	1.27033	1.82207
-	chr6	30618172	CCACACCTATATGTTGATGATGC	GCCACACCTATATGTTGATGA	ineffective-gDNA	DHS_16	-	-	0	0	0	0	0	0	0	0	2.64249	1.25247	5.82205	6.00696	0	0	0	0
+	chr6	30619739	GGGTGCGTATTTCAGCGTGG	GGGTGCGTATTTCAGCGTGG	control-gDNA sequences	-	-	-	163	348	58	87	307	549	539	605	353.058	89.0968	433.413	666.597	0.46168	0.650978	0.708332	0.808585
+	chr6	30619740	GGTGCGTATTTCAGCGTGGA	GGTGCGTATTTCAGCGTGGA	control-gDNA sequences	-	-	-	16	48	0	0	174	151	166	150	57.2017	1.25247	135.351	186.369	0.279712	0	1.28555	0.890707
-	chr6	30620464	CCAAACACCTTAGCCTCTTTAAA	GCCAAACACCTTAGCCTCTTT	ineffective-gDNA	CTCF_8	DHS_17	-	42	95	60	136	33	132	74	47	103.983	130.437	120.876	65.7671	0.403912	0.459991	0.273006	1.12518
-	chr6	30620471	CCTTAGCCTCTTTAAATATACTT	GCCTTAGCCTCTTTAAATATA	ineffective-gDNA	CTCF_8	DHS_17	-	0	0	0	0	0	0	0	0	2.64249	1.25247	5.82205	6.00696	0	0	0	0
+	chr6	30620494	TCCTTTGCTCCTTGGTTAACAGG	GTCCTTTGCTCCTTGGTTAAC	regulatory-gDNA sequences	CTCF_8	DHS_17	-	0	0	0	0	0	0	0	0	2.64249	1.25247	5.82205	6.00696	0	0	0	0
-	chr6	30620495	CCTTTGCTCCTTGGTTAACAGGG	GCCTTTGCTCCTTGGTTAACA	ineffective-gDNA	CTCF_8	DHS_17	-	0	0	0	0	0	0	0	0	2.64249	1.25247	5.82205	6.00696	0	0	0	0
-	chr6	30620503	CCTTGGTTAACAGGGTCTGTCTG	GCCTTGGTTAACAGGGTCTGT	ineffective-gDNA	CTCF_8	DHS_17	-	27	45	0	0	84	65	0	76	54.0713	1.25247	65.977	101.147	0.49934	0	1.27317	0
-	chr6	30620544	CCCAGTGACTCAGATCCTGAAAG	GCCCAGTGACTCAGATCCTGA	ineffective-gDNA	CTCF_8	DHS_17	-	0	0	0	0	0	0	0	0	2.64249	1.25247	5.82205	6.00696	0	0	0	0
+	chr6	30620545	CCAGTGACTCAGATCCTGAAAGG	GCCAGTGACTCAGATCCTGAA	regulatory-gDNA sequences	CTCF_8	DHS_17	-	0	0	0	0	0	0	0	0	2.64249	1.25247	5.82205	6.00696	0	0	0	0
-	chr6	30620607	CCATCTAGTGGGCAACCTGTCCA	GCCATCTAGTGGGCAACCTGT	ineffective-gDNA	CTCF_8	DHS_17	-	107	139	231	495	205	484	245	261	148.932	437.368	379.867	301.372	0.718448	0.528159	0.539663	0.812948
-	chr6	30620622	CCTGTCCAACTACACTTTTTGCT	GCCTGTCCAACTACACTTTTT	ineffective-gDNA	CTCF_8	DHS_17	-	0	0	0	0	0	0	0	0	2.64249	1.25247	5.82205	6.00696	0	0	0	0
-	chr6	30620627	CCAACTACACTTTTTGCTATCAT	GCCAACTACACTTTTTGCTAT	ineffective-gDNA	CTCF_8	DHS_17	-	15	49	55	67	53	79	39	30	58.2377	71.2125	78.0578	44.4927	0.257565	0.772336	0.678984	0.876548
+	chr6	30620646	TCATCCAATACAGACAACACTGG	GTCATCCAATACAGACAACAC	regulatory-gDNA sequences	CTCF_8	DHS_17	-	0	0	0	0	0	0	0	0	2.64249	1.25247	5.82205	6.00696	0	0	0	0
-	chr6	30621510	ATCCCGTTATCTACATGGGG	GATCCCGTTATCTACATGGGG	control-gDNA sequences	-	-	-	89	185	185	356	668	615	515	466	196.959	327.643	489.024	506.888	0.451872	0.564638	1.36599	1.016
+	chr6	30621853	CATAAGGGTTTCGGCCAGCC	GCATAAGGGTTTCGGCCAGCC	control-gDNA sequences	-	-	-	16	42	18	18	127	73	0	33	50.9045	22.0689	72.9257	48.2736	0.314314	0.815627	1.7415	0
+	chr6	30622406	CCTACGCTATAGCAGGGGGC	GCCTACGCTATAGCAGGGGGC	control-gDNA sequences	-	-	-	1036	1816	734	1484	2997	4106	3379	3362	2097.28	1382.8	3306.48	3686.89	0.493974	0.530806	0.906402	0.91649
+	chr6	30622407	CTACGCTATAGCAGGGGGCT	GCTACGCTATAGCAGGGGGCT	control-gDNA sequences	-	-	-	1695	1285	634	994	1908	2912	2462	2364	1426.37	868.508	2365.58	2625.83	1.18833	0.729988	0.806569	0.937607
+	chr6	30622539	CACATCATTCCGAGCCGCCT	GCACATCATTCCGAGCCGCCT	control-gDNA sequences	-	-	-	5221	5920	5046	5448	10634	12105	11101	10796	7117.48	5404.3	9571.96	11577.5	0.733546	0.933701	1.11095	0.958841
-	chr6	30623244	CTCGCTGATCAATGGGCTGG	GCTCGCTGATCAATGGGCTGG	control-gDNA sequences	-	-	-	140	313	295	719	378	403	587	377	321.413	601.374	317.523	413.821	0.435577	0.490543	1.19047	1.41849
-	chr6	30628219	GACCATCGGCTGTGTGGGTA	GACCATCGGCTGTGTGGGTA	control-gDNA sequences	-	-	-	105	125	202	222	309	644	741	699	134.435	202.157	513.691	777.086	0.781045	0.999223	0.601528	0.953563
+	chr6	30629295	TGGCGGGAAATTCACAACCT	GTGGCGGGAAATTCACAACCT	control-gDNA sequences	-	-	-	0	0	0	0	32	0	0	7	2.64249	1.25247	5.82205	15.1018	0	0	5.49635	0
-	chr6	30630190	TAGTGCTGATGTCCGCAGTT	GTAGTGCTGATGTCCGCAGTT	control-gDNA sequences	-	-	-	2068	886	390	842	1419	2172	1452	1598	918.873	709.497	1781.66	1811.11	2.25058	0.549685	0.79645	0.801718
+	chr6	30630637	TAGCTCCAAGGAGGACGTCG	GTAGCTCCAAGGAGGACGTCG	control-gDNA sequences	-	-	-	147	235	89	151	339	474	82	238	247.964	142.745	371.912	278.716	0.592829	0.623488	0.911507	0.294206
+	chr6	30631263	TCCGGGTAGGCGGGAAAGCC	GTCCGGGTAGGCGGGAAAGCC	control-gDNA sequences	-	-	-	0	0	0	0	0	0	0	0	2.64249	1.25247	5.82205	6.00696	0	0	0	0
+	chr6	30631310	CGATTTGGGTCGTAGCCTCG	GCGATTTGGGTCGTAGCCTCG	control-gDNA sequences	-	-	-	2364	1939	3113	1469	3413	4183	3724	3124	2251.96	1367.12	3367.1	3433.9	1.04975	2.27706	1.01363	1.08448
+	chr6	30631328	CGTGGACCCAGCCCCTGAGAAGG	GCGTGGACCCAGCCCCTGAGA	regulatory-gDNA sequences	DHS_18	-	-	0	0	0	0	0	0	0	0	2.64249	1.25247	5.82205	6.00696	0	0	0	0
-	chr6	30631335	CCAGCCCCTGAGAAGGCTGCTGG	GCCAGCCCCTGAGAAGGCTGC	ineffective-gDNA	DHS_18	-	-	143	271	194	345	187	592	280	327	282.569	317.962	469.557	365.099	0.506071	0.610135	0.398248	0.766915
-	chr6	30631339	CCCCTGAGAAGGCTGCTGGTTAA	GCCCCTGAGAAGGCTGCTGGT	ineffective-gDNA	DHS_18	-	-	360	379	153	243	902	794	955	831	380.739	220.939	643.042	934.232	0.945529	0.6925	1.40271	1.02223
-	chr6	30631340	CCCTGAGAAGGCTGCTGGTTAAG	GCCCTGAGAAGGCTGCTGGTT	ineffective-gDNA	DHS_18	-	-	314	518	100	243	930	821	763	779	505.286	220.939	666.563	872.138	0.62143	0.452614	1.39522	0.874861
+	chr6	30631347	AAGGCTGCTGGTTAAGCCTGCGG	GAAGGCTGCTGGTTAAGCCTG	regulatory-gDNA sequences	DHS_18	-	-	38	139	23	41	365	200	285	265	148.932	46.3048	171.397	305.274	0.25515	0.496709	2.12956	0.933586
+	chr6	30631356	GGTTAAGCCTGCGGATATGATGG	GGTTAAGCCTGCGGATATGA	regulatory-gDNA sequences	DHS_18	-	-	0	0	0	0	0	0	0	0	2.64249	1.25247	5.82205	6.00696	0	0	0	0
+	chr6	30631357	GTTAAGCCTGCGGATATGATGGG	GTTAAGCCTGCGGATATGAT	regulatory-gDNA sequences	DHS_18	-	-	0	0	0	0	0	0	0	0	2.64249	1.25247	5.82205	6.00696	0	0	0	0
-	chr6	30631363	CCTGCGGATATGATGGGTCACAG	GCCTGCGGATATGATGGGTCA	ineffective-gDNA	DHS_18	-	-	85	180	647	471	488	218	428	363	191.749	419.676	184.378	400.031	0.443287	1.54167	2.64673	1.06992
+	chr6	30631378	GGTCACAGACTCCCCGTCCGAGG	GGTCACAGACTCCCCGTCCG	regulatory-gDNA sequences	DHS_18	-	-	559	649	426	648	1219	1628	2481	1058	633.073	547.311	1352.01	1205.33	0.882994	0.778351	0.901619	2.05836
+	chr6	30631384	AGACTCCCCGTCCGAGGTGTCGG	GAGACTCCCCGTCCGAGGTGT	regulatory-gDNA sequences	DHS_18	-	-	770	906	421	705	1432	2425	1877	1576	944.381	590.361	1981.36	1787.71	0.815349	0.713123	0.722735	1.04995
-	chr6	30631389	CCCCGTCCGAGGTGTCGGTCTGT	GCCCCGTCCGAGGTGTCGGTC	ineffective-gDNA	DHS_18	-	-	678	1227	537	945	1268	2567	2467	2225	1352.78	816.864	2093.42	2478.01	0.50119	0.657393	0.605708	0.995555
-	chr6	30631390	CCCGTCCGAGGTGTCGGTCTGTT	GCCCGTCCGAGGTGTCGGTCT	ineffective-gDNA	DHS_18	-	-	492	577	513	870	644	959	925	902	560.818	737.795	787.35	1019.19	0.877291	0.695315	0.817934	0.907586
-	chr6	30631391	CCGTCCGAGGTGTCGGTCTGTTC	GCCGTCCGAGGTGTCGGTCTG	ineffective-gDNA	DHS_18	-	-	900	1751	777	1125	2521	3427	3287	3812	2015.43	1006.38	2771.6	4165.17	0.446556	0.772071	0.909583	0.789163
-	chr6	30631395	CCGAGGTGTCGGTCTGTTCCTCT	GCCGAGGTGTCGGTCTGTTCC	ineffective-gDNA	DHS_18	-	-	255	413	447	214	874	970	875	1002	410.926	195.207	796.997	1138.71	0.620549	2.28988	1.09662	0.768414
+	chr6	30631407	TCTGTTCCTCTCGCCGCTCCCGG	GTCTGTTCCTCTCGCCGCTCC	regulatory-gDNA sequences	DHS_18	-	-	71	142	403	141	275	370	207	114	152.054	134.547	293.223	145.754	0.466941	2.99524	0.937852	1.4202
+	chr6	30631419	GCCGCTCCCGGCTCCCGCTGCGG	GCCGCTCCCGGCTCCCGCTG	regulatory-gDNA sequences	DHS_18	-	-	64	95	0	3	387	146	232	217	103.983	4.84919	131.577	257.612	0.615485	0	2.94125	0.90058
-	chr6	30631426	CCGGCTCCCGCTGCGGCTGTTGG	GCCGGCTCCCGCTGCGGCTGT	ineffective-gDNA	DHS_18	-	-	101	232	160	322	249	248	405	293	244.985	297.086	205.85	332.381	0.41227	0.538565	1.20962	1.21848
-	chr6	30631432	CCCGCTGCGGCTGTTGGAACTGG	GCCCGCTGCGGCTGTTGGAAC	ineffective-gDNA	DHS_18	-	-	14	18	0	0	0	22	0	0	24.0817	1.25247	26.8868	6.00696	0.581355	0	0	0
-	chr6	30631433	CCGCTGCGGCTGTTGGAACTGGA	GCCGCTGCGGCTGTTGGAACT	ineffective-gDNA	DHS_18	-	-	1	0	0	0	0	0	0	0	2.64249	1.25247	5.82205	6.00696	0.378431	0	0	0
+	chr6	30631459	CAGCCCATCTTGAAGCCCTGCGG	GCAGCCCATCTTGAAGCCCTG	regulatory-gDNA sequences	DHS_18	-	-	24	61	0	0	0	112	37	69	70.4252	1.25247	105.195	92.7175	0.340787	0	0	0.399062
+	chr6	30631460	AGCCCATCTTGAAGCCCTGCGGG	GAGCCCATCTTGAAGCCCTGC	regulatory-gDNA sequences	DHS_18	-	-	0	8	0	0	0	0	10	0	12.3235	1.25247	5.82205	6.00696	0	0	0	1.66474
+	chr6	30631461	GCCCATCTTGAAGCCCTGCGGGG	GCCCATCTTGAAGCCCTGCG	regulatory-gDNA sequences	DHS_18	-	-	0	0	0	0	31	62	14	52	2.64249	1.25247	63.3389	71.9546	0	0	0.489431	0.194567
-	chr6	30631462	CCCATCTTGAAGCCCTGCGGGGA	GCCCATCTTGAAGCCCTGCGG	ineffective-gDNA	DHS_18	-	-	0	36	0	0	277	209	0	105	44.4487	1.25247	177.899	135.359	0	0	1.55706	0
-	chr6	30631463	CCATCTTGAAGCCCTGCGGGGAG	GCCATCTTGAAGCCCTGCGGG	ineffective-gDNA	DHS_18	-	-	142	95	186	360	176	377	313	293	103.983	331.118	298.338	332.381	1.36561	0.561734	0.589935	0.94169
+	chr6	30631464	CATCTTGAAGCCCTGCGGGGAGG	GCATCTTGAAGCCCTGCGGGG	regulatory-gDNA sequences	DHS_18	-	-	47	100	0	2	86	147	114	197	108.983	3.6564	132.333	237.029	0.43126	0	0.649874	0.480953
+	chr6	30631465	ATCTTGAAGCCCTGCGGGGAGGG	GATCTTGAAGCCCTGCGGGGA	regulatory-gDNA sequences	DHS_18	-	-	109	109	12	13	183	89	154	102	118.066	16.4645	86.4681	131.871	0.92321	0.72884	2.11639	1.16781
+	chr6	30631466	TCTTGAAGCCCTGCGGGGAGGGG	GTCTTGAAGCCCTGCGGGGAG	regulatory-gDNA sequences	DHS_18	-	-	33	65	23	31	168	62	47	0	74.4094	36.0599	63.3389	6.00696	0.443492	0.637827	2.6524	7.82426
-	chr6	30631474	CCCTGCGGGGAGGGGCCGGTGAC	GCCCTGCGGGGAGGGGCCGGT	ineffective-gDNA	DHS_18	-	-	0	0	0	0	0	0	1	0	2.64249	1.25247	5.82205	6.00696	0	0	0	0.166474
-	chr6	30631475	CCTGCGGGGAGGGGCCGGTGACG	GCCTGCGGGGAGGGGCCGGTG	ineffective-gDNA	DHS_18	-	-	0	0	0	0	22	62	0	0	2.64249	1.25247	63.3389	6.00696	0	0	0.347338	0
+	chr6	30631659	GGACGGCGCCCCGTGCTAGC	GGACGGCGCCCCGTGCTAGC	control-gDNA sequences	-	-	-	73	91	145	174	160	431	187	240	100.009	161.611	338.578	280.703	0.729931	0.897214	0.472565	0.666184
-	chr6	30631752	CCCTCGCGGCCTATCGCGGA	GCCCTCGCGGCCTATCGCGGA	control-gDNA sequences	-	-	-	0	0	0	0	0	0	0	0	2.64249	1.25247	5.82205	6.00696	0	0	0	0
-	chr6	30631753	ACCCTCGCGGCCTATCGCGG	GACCCTCGCGGCCTATCGCGG	control-gDNA sequences	-	-	-	47	154	45	174	115	244	100	155	164.575	161.611	202.996	191.894	0.285585	0.278446	0.566514	0.521121
-	chr6	30631756	TCAACCCTCGCGGCCTATCG	GTCAACCCTCGCGGCCTATCG	control-gDNA sequences	-	-	-	432	655	578	1082	1399	1594	1826	1714	639.376	961.158	1325.15	1934.51	0.675659	0.601358	1.05573	0.943909
+	chr6	30631758	ATAGGCCGCGAGGGTTGACG	GATAGGCCGCGAGGGTTGACG	control-gDNA sequences	-	-	-	87	204	104	217	583	786	633	879	216.624	197.802	636.084	991.659	0.401617	0.525779	0.916545	0.638324
-	chr6	30631987	CCGCCGAGCTCCCGCCGCCTCAA	GCCGCCGAGCTCCCGCCGCCT	ineffective-gDNA	DHS_19	-	-	2764	3112	2337	3877	4719	5854	5843	5771	3713.65	3839.52	4681.2	6246.25	0.744281	0.608669	1.00807	0.935441
-	chr6	30631990	CCGAGCTCCCGCCGCCTCAACTG	GCCGAGCTCCCGCCGCCTCAA	ineffective-gDNA	DHS_19	-	-	55	154	183	361	173	437	111	438	164.575	331.983	343.151	476.33	0.334195	0.551234	0.504151	0.233032
-	chr6	30631997	CCCGCCGCCTCAACTGACTGCCC	GCCCGCCGCCTCAACTGACTG	ineffective-gDNA	DHS_19	-	-	109	197	116	196	508	504	398	684	209.408	179.893	396.037	759.354	0.520515	0.644828	1.28271	0.52413
-	chr6	30632001	CCGCCTCAACTGACTGCCCCCCG	GCCGCCTCAACTGACTGCCCC	ineffective-gDNA	DHS_19	-	-	1191	1453	942	1635	2542	3731	3312	3723	1639.19	1540.51	3011.14	4070.59	0.726579	0.611487	0.8442	0.813642
+	chr6	30632002	CGCCTCAACTGACTGCCCCCCGG	GCGCCTCAACTGACTGCCCCC	regulatory-gDNA sequences	DHS_19	-	-	158	284	184	217	395	571	800	676	294.716	197.802	451.862	749.911	0.53611	0.930225	0.87416	1.06679
+	chr6	30632003	GCCTCAACTGACTGCCCCCCGGG	GCCTCAACTGACTGCCCCCC	regulatory-gDNA sequences	DHS_19	-	-	116	211	33	205	648	636	748	940	223.797	187.5	506.873	1064.66	0.518326	0.176	1.27843	0.702574
-	chr6	30632031	CCCCGCCGCAGGGGCCCGGGACC	GCCCCGCCGCAGGGGCCCGGG	ineffective-gDNA	DHS_19	-	-	0	0	0	0	0	0	0	0	2.64249	1.25247	5.82205	6.00696	0	0	0	0
-	chr6	30632032	CCCGCCGCAGGGGCCCGGGACCC	GCCCGCCGCAGGGGCCCGGGA	ineffective-gDNA	DHS_19	-	-	0	0	20	46	0	0	0	0	2.64249	51.2757	5.82205	6.00696	0	0.390048	0	0
-	chr6	30632033	CCGCCGCAGGGGCCCGGGACCCT	GCCGCCGCAGGGGCCCGGGAC	ineffective-gDNA	DHS_19	-	-	16	39	0	0	0	66	28	39	47.6981	1.25247	66.8524	55.8007	0.335443	0	0	0.501786
-	chr6	30632036	CCGCAGGGGCCCGGGACCCTAGA	GCCGCAGGGGCCCGGGACCCT	ineffective-gDNA	DHS_19	-	-	0	0	0	0	0	0	0	0	2.64249	1.25247	5.82205	6.00696	0	0	0	0
+	chr6	30632038	GCAGGGGCCCGGGACCCTAGAGG	GCAGGGGCCCGGGACCCTAG	regulatory-gDNA sequences	DHS_19	-	-	0	0	0	0	0	0	0	0	2.64249	1.25247	5.82205	6.00696	0	0	0	0
+	chr6	30632041	GGGGCCCGGGACCCTAGAGGAGG	GGGGCCCGGGACCCTAGAGG	regulatory-gDNA sequences	DHS_19	-	-	0	0	0	0	0	0	0	0	2.64249	1.25247	5.82205	6.00696	0	0	0	0
+	chr6	30632044	GCCCGGGACCCTAGAGGAGGCGG	GCCCGGGACCCTAGAGGAGG	regulatory-gDNA sequences	DHS_19	-	-	0	0	11	43	83	19	0	0	2.64249	48.3047	24.0608	6.00696	0	0.227721	3.4496	0
-	chr6	30632045	CCCGGGACCCTAGAGGAGGCGGG	GCCCGGGACCCTAGAGGAGGC	ineffective-gDNA	DHS_19	-	-	190	406	182	301	659	880	843	986	404.716	277.214	718.117	1119.62	0.469465	0.656531	0.917678	0.752932
-	chr6	30632046	CCGGGACCCTAGAGGAGGCGGGG	GCCGGGACCCTAGAGGAGGCG	ineffective-gDNA	DHS_19	-	-	72	74	80	85	399	314	77	87	83.2896	87.3452	252.862	114.256	0.864454	0.915906	1.57793	0.673927
-	chr6	30632052	CCCTAGAGGAGGCGGGGCTAGCA	GCCCTAGAGGAGGCGGGGCTA	ineffective-gDNA	DHS_19	-	-	0	0	0	0	0	0	0	0	2.64249	1.25247	5.82205	6.00696	0	0	0	0
-	chr6	30632053	CCTAGAGGAGGCGGGGCTAGCAG	GCCTAGAGGAGGCGGGGCTAG	ineffective-gDNA	DHS_19	-	-	0	0	0	0	0	0	0	0	2.64249	1.25247	5.82205	6.00696	0	0	0	0
+	chr6	30632054	CTAGAGGAGGCGGGGCTAGCAGG	GCTAGAGGAGGCGGGGCTAGC	regulatory-gDNA sequences	DHS_19	-	-	9	45	59	83	235	52	142	134	54.0713	85.5866	54.4279	168.503	0.166447	0.689361	4.31764	0.842715
+	chr6	30632066	GGGCTAGCAGGTGACGTCAGCGG	GGGCTAGCAGGTGACGTCAG	regulatory-gDNA sequences	DHS_19	-	-	0	0	0	0	0	0	0	0	2.64249	1.25247	5.82205	6.00696	0	0	0	0
+	chr6	30632067	GGCTAGCAGGTGACGTCAGCGGG	GGCTAGCAGGTGACGTCAGC	regulatory-gDNA sequences	DHS_19	-	-	32	104	0	10	190	235	12	73	113.007	13.0382	196.565	97.5426	0.283167	0	0.966599	0.123023
+	chr6	30632070	TAGCAGGTGACGTCAGCGGGCGG	GTAGCAGGTGACGTCAGCGGG	regulatory-gDNA sequences	DHS_19	-	-	347	443	248	418	976	923	1240	739	437.579	379.055	755.784	824.522	0.792999	0.654258	1.29137	1.5039
+	chr6	30632071	AGCAGGTGACGTCAGCGGGCGGG	GAGCAGGTGACGTCAGCGGGC	regulatory-gDNA sequences	DHS_19	-	-	1965	1647	1082	1639	2307	3452	2516	3131	1884.3	1544.68	2791.3	3441.34	1.04283	0.700469	0.826496	0.731111
+	chr6	30632093	GCCCGACAGAATTACCGCCGCGG	GCCCGACAGAATTACCGCCG	regulatory-gDNA sequences	DHS_19	-	-	73	145	218	374	98	135	308	308	155.179	343.094	123.187	346.816	0.470424	0.635395	0.79554	0.888079
-	chr6	30632094	CCCGACAGAATTACCGCCGCGGC	GCCCGACAGAATTACCGCCGC	ineffective-gDNA	DHS_19	-	-	1061	2169	1168	2436	4126	4125	3023	3989	2540.48	2370.97	3321.44	4353.27	0.417637	0.492626	1.24223	0.69442
-	chr6	30632095	CCGACAGAATTACCGCCGCGGCG	GCCGACAGAATTACCGCCGCG	ineffective-gDNA	DHS_19	-	-	1282	2655	2952	2012	4480	4440	4420	3868	3147.05	1932.65	3569.41	4224.69	0.407365	1.52744	1.25511	1.04623
+	chr6	30632096	CGACAGAATTACCGCCGCGGCGG	GCGACAGAATTACCGCCGCGG	regulatory-gDNA sequences	DHS_19	-	-	649	330	192	359	373	853	845	514	336.849	330.251	694.501	561.421	1.92668	0.581375	0.537076	1.50511
+	chr6	30632102	AATTACCGCCGCGGCGGCGATGG	GAATTACCGCCGCGGCGGCGA	regulatory-gDNA sequences	DHS_19	-	-	0	0	0	0	0	0	0	0	2.64249	1.25247	5.82205	6.00696	0	0	0	0
+	chr6	30632106	ACCGCCGCGGCGGCGATGGAAGG	GACCGCCGCGGCGGCGATGGA	regulatory-gDNA sequences	DHS_19	-	-	0	0	0	0	0	0	0	0	2.64249	1.25247	5.82205	6.00696	0	0	0	0
-	chr6	30632107	CCGCCGCGGCGGCGATGGAAGGC	GCCGCCGCGGCGGCGATGGAA	ineffective-gDNA	DHS_19	-	-	0	0	0	0	0	0	0	0	2.64249	1.25247	5.82205	6.00696	0	0	0	0
+	chr6	30632116	CGGCGATGGAAGGCGGACGGGGG	GCGGCGATGGAAGGCGGACGG	regulatory-gDNA sequences	DHS_19	-	-	10	4	3	0	65	0	0	0	7.51709	1.25247	5.82205	6.00696	1.3303	2.39526	11.1645	0
+	chr6	30632321	TCATCACTACCTTGCGCTCCCGG	GTCATCACTACCTTGCGCTCC	regulatory-gDNA sequences	CTCF_9	DHS_20	-	1369	492	384	758	895	1293	933	1554	481.548	633.241	1077.57	1764.3	2.84291	0.606404	0.830572	0.528821
+	chr6	30632322	CATCACTACCTTGCGCTCCCGGG	GCATCACTACCTTGCGCTCCC	regulatory-gDNA sequences	CTCF_9	DHS_20	-	836	1414	1044	1262	2686	3055	3704	3169	1589.83	1150.28	2478.35	3481.73	0.525843	0.907607	1.08379	1.06384
-	chr6	30632330	CCTTGCGCTCCCGGGAGAACCTA	GCCTTGCGCTCCCGGGAGAAC	ineffective-gDNA	CTCF_9	DHS_20	-	0	0	0	0	0	0	0	0	2.64249	1.25247	5.82205	6.00696	0	0	0	0
-	chr6	30632339	CCCGGGAGAACCTACCACTCACC	GCCCGGGAGAACCTACCACTC	ineffective-gDNA	CTCF_9	DHS_20	-	0	0	0	0	0	0	0	0	2.64249	1.25247	5.82205	6.00696	0	0	0	0
-	chr6	30632340	CCGGGAGAACCTACCACTCACCT	GCCGGGAGAACCTACCACTCA	ineffective-gDNA	CTCF_9	DHS_20	-	0	0	0	0	0	0	0	0	2.64249	1.25247	5.82205	6.00696	0	0	0	0
+	chr6	30632342	GGGAGAACCTACCACTCACCTGG	GGGAGAACCTACCACTCACC	regulatory-gDNA sequences	CTCF_9	DHS_20	-	18	36	11	33	26	57	66	40	44.4487	38.1429	58.9018	57.0508	0.404961	0.288389	0.441412	1.15686
+	chr6	30632346	GAACCTACCACTCACCTGGAGGG	GAACCTACCACTCACCTGGA	regulatory-gDNA sequences	CTCF_9	DHS_20	-	3	37	0	0	0	0	31	47	45.5368	1.25247	5.82205	65.7671	0.0658808	0	0	0.47136
+	chr6	30632347	AACCTACCACTCACCTGGAGGGG	GAACCTACCACTCACCTGGAG	regulatory-gDNA sequences	CTCF_9	DHS_20	-	0	0	0	0	0	0	0	0	2.64249	1.25247	5.82205	6.00696	0	0	0	0
+	chr6	30632348	ACCTACCACTCACCTGGAGGGGG	GACCTACCACTCACCTGGAGG	regulatory-gDNA sequences	CTCF_9	DHS_20	-	44	86	0	0	208	429	247	217	95.0739	1.25247	337.058	257.612	0.462798	0	0.617104	0.958808
-	chr6	30632349	CCTACCACTCACCTGGAGGGGGC	GCCTACCACTCACCTGGAGGG	ineffective-gDNA	CTCF_9	DHS_20	-	53	85	86	132	73	271	227	356	94.0899	127.142	222.232	393.188	0.563291	0.676411	0.328485	0.577331
+	chr6	30632351	TACCACTCACCTGGAGGGGGCGG	GTACCACTCACCTGGAGGGGG	regulatory-gDNA sequences	CTCF_9	DHS_20	-	103	101	67	157	298	193	141	289	109.987	147.659	166.322	328.525	0.936472	0.453749	1.7917	0.429191
-	chr6	30632353	CCACTCACCTGGAGGGGGCGGCG	GCCACTCACCTGGAGGGGGCG	ineffective-gDNA	CTCF_9	DHS_20	-	44	76	42	102	147	104	55	58	85.2537	102.038	98.7725	79.3307	0.516107	0.411611	1.48827	0.6933
+	chr6	30632354	CACTCACCTGGAGGGGGCGGCGG	GCACTCACCTGGAGGGGGCGG	regulatory-gDNA sequences	CTCF_9	DHS_20	-	606	584	131	259	619	1214	999	1633	567.598	235.88	1009.81	1848.34	1.06766	0.555367	0.612987	0.540484
-	chr6	30632360	CCTGGAGGGGGCGGCGGAGCGGA	GCCTGGAGGGGGCGGCGGAGC	ineffective-gDNA	CTCF_9	DHS_20	-	0	0	0	0	0	0	0	0	2.64249	1.25247	5.82205	6.00696	0	0	0	0
+	chr6	30632381	GAGGGCGGGGCCTACTACCTAGG	GAGGGCGGGGCCTACTACCT	regulatory-gDNA sequences	CTCF_9	DHS_20	-	0	0	0	0	0	0	0	0	2.64249	1.25247	5.82205	6.00696	0	0	0	0
+	chr6	30632382	AGGGCGGGGCCTACTACCTAGGG	GAGGGCGGGGCCTACTACCTA	regulatory-gDNA sequences	CTCF_9	DHS_20	-	0	0	0	0	0	0	0	0	2.64249	1.25247	5.82205	6.00696	0	0	0	0
+	chr6	30632383	GGGCGGGGCCTACTACCTAGGGG	GGGCGGGGCCTACTACCTAG	regulatory-gDNA sequences	CTCF_9	DHS_20	-	0	0	0	0	0	0	0	0	2.64249	1.25247	5.82205	6.00696	0	0	0	0
+	chr6	30632389	GGCCTACTACCTAGGGGAGAGGG	GGCCTACTACCTAGGGGAGA	regulatory-gDNA sequences	CTCF_9	DHS_20	-	0	0	0	0	0	0	0	0	2.64249	1.25247	5.82205	6.00696	0	0	0	0
+	chr6	30632390	GCCTACTACCTAGGGGAGAGGGG	GCCTACTACCTAGGGGAGAG	regulatory-gDNA sequences	CTCF_9	DHS_20	-	0	0	0	0	0	0	0	0	2.64249	1.25247	5.82205	6.00696	0	0	0	0
-	chr6	30632391	CCTACTACCTAGGGGAGAGGGGG	GCCTACTACCTAGGGGAGAGG	ineffective-gDNA	CTCF_9	DHS_20	-	0	0	0	0	0	0	0	0	2.64249	1.25247	5.82205	6.00696	0	0	0	0
+	chr6	30632396	TACCTAGGGGAGAGGGGGCGTGG	GTACCTAGGGGAGAGGGGGCG	regulatory-gDNA sequences	CTCF_9	DHS_20	-	73	176	148	232	320	406	198	413	187.575	210.996	319.758	450.139	0.389177	0.701437	1.00076	0.439864
-	chr6	30632398	CCTAGGGGAGAGGGGGCGTGGAC	GCCTAGGGGAGAGGGGGCGTG	ineffective-gDNA	CTCF_9	DHS_20	-	152	444	247	607	844	754	1341	639	438.47	517.585	608.308	706.376	0.34666	0.477216	1.38746	1.89842
+	chr6	30632426	GAGGCTATACTACAAAGCCCCGG	GAGGCTATACTACAAAGCCC	regulatory-gDNA sequences	CTCF_9	DHS_20	-	0	0	0	0	0	0	0	0	2.64249	1.25247	5.82205	6.00696	0	0	0	0
+	chr6	30632427	AGGCTATACTACAAAGCCCCGGG	GAGGCTATACTACAAAGCCCC	regulatory-gDNA sequences	CTCF_9	DHS_20	-	6	17	0	0	0	91	0	0	22.9205	1.25247	88.1296	6.00696	0.261774	0	0	0
+	chr6	30632441	AGCCCCGGGCTTGACCTTAGTGG	GAGCCCCGGGCTTGACCTTAG	regulatory-gDNA sequences	CTCF_9	DHS_20	-	3	27	0	0	32	37	0	0	34.4129	1.25247	40.8142	6.00696	0.0871766	0	0.78404	0
-	chr6	30632443	CCCCGGGCTTGACCTTAGTGGAA	GCCCCGGGCTTGACCTTAGTG	ineffective-gDNA	CTCF_9	DHS_20	-	0	0	0	0	0	0	0	0	2.64249	1.25247	5.82205	6.00696	0	0	0	0
-	chr6	30632444	CCCGGGCTTGACCTTAGTGGAAA	GCCCGGGCTTGACCTTAGTGG	ineffective-gDNA	CTCF_9	DHS_20	-	250	411	182	429	403	860	837	681	409.152	387.698	700.621	755.811	0.61102	0.469438	0.575204	1.10742
-	chr6	30632445	CCGGGCTTGACCTTAGTGGAAAG	GCCGGGCTTGACCTTAGTGGA	ineffective-gDNA	CTCF_9	DHS_20	-	0	0	0	0	0	0	0	0	2.64249	1.25247	5.82205	6.00696	0	0	0	0
-	chr6	30632455	CCTTAGTGGAAAGCCGAGACTGC	GCCTTAGTGGAAAGCCGAGAC	ineffective-gDNA	CTCF_9	DHS_20	-	55	65	72	96	115	135	151	92	74.4094	96.9002	123.187	120.16	0.739154	0.743032	0.933542	1.25665
+	chr6	30632462	GGAAAGCCGAGACTGCGTCCAGG	GGAAAGCCGAGACTGCGTCC	regulatory-gDNA sequences	CTCF_9	DHS_20	-	300	726	3426	1213	1658	1495	2214	1532	717.995	1098.85	1245.99	1740.9	0.41783	3.11781	1.33067	1.27176
-	chr6	30632468	CCGAGACTGCGTCCAGGTTGCTG	GCCGAGACTGCGTCCAGGTTG	ineffective-gDNA	CTCF_9	DHS_20	-	5240	6861	4754	8458	10971	13919	12512	12193	8229.49	8301.25	10984.2	13058.1	0.636734	0.572685	0.998796	0.958176
-	chr6	30632549	GTCCCAACAGGTCGGCACCC	GTCCCAACAGGTCGGCACCC	control-gDNA sequences	-	-	-	221	381	201	402	212	741	991	951	382.518	366.25	597.052	1077.81	0.577751	0.548805	0.355078	0.919457
+	chr6	30632581	TGGGAACGATGATAAGGAGCAGG	GTGGGAACGATGATAAGGAGC	regulatory-gDNA sequences	DHS_21	Promoter_2	-	0	0	0	0	0	0	0	0	2.64249	1.25247	5.82205	6.00696	0	0	0	0
+	chr6	30632607	ACAGATCATAAGTGCAAAAGCGG	GACAGATCATAAGTGCAAAAG	regulatory-gDNA sequences	DHS_21	Promoter_2	-	0	0	0	0	0	0	0	0	2.64249	1.25247	5.82205	6.00696	0	0	0	0
+	chr6	30632608	CAGATCATAAGTGCAAAAGCGGG	GCAGATCATAAGTGCAAAAGC	regulatory-gDNA sequences	DHS_21	Promoter_2	-	0	0	0	0	0	0	0	0	2.64249	1.25247	5.82205	6.00696	0	0	0	0
+	chr6	30632616	AAGTGCAAAAGCGGGCGAGAAGG	GAAGTGCAAAAGCGGGCGAGA	regulatory-gDNA sequences	DHS_21	Promoter_2	-	0	0	0	0	0	0	0	0	2.64249	1.25247	5.82205	6.00696	0	0	0	0
+	chr6	30632617	AGTGCAAAAGCGGGCGAGAAGGG	GAGTGCAAAAGCGGGCGAGAA	regulatory-gDNA sequences	DHS_21	Promoter_2	-	0	0	0	0	0	0	0	0	2.64249	1.25247	5.82205	6.00696	0	0	0	0
+	chr6	30632629	GGCGAGAAGGGAAACCCAAGCGG	GGCGAGAAGGGAAACCCAAG	regulatory-gDNA sequences	DHS_21	Promoter_2	-	0	0	0	0	0	0	0	0	2.64249	1.25247	5.82205	6.00696	0	0	0	0
+	chr6	30632630	GCGAGAAGGGAAACCCAAGCGGG	GCGAGAAGGGAAACCCAAGC	regulatory-gDNA sequences	DHS_21	Promoter_2	-	0	0	0	0	0	0	0	0	2.64249	1.25247	5.82205	6.00696	0	0	0	0
+	chr6	30632636	AGGGAAACCCAAGCGGGACAAGG	GAGGGAAACCCAAGCGGGACA	regulatory-gDNA sequences	DHS_21	Promoter_2	-	0	0	0	0	0	0	0	0	2.64249	1.25247	5.82205	6.00696	0	0	0	0
-	chr6	30632643	CCCAAGCGGGACAAGGACTTTTG	GCCCAAGCGGGACAAGGACTT	ineffective-gDNA	DHS_21	Promoter_2	-	0	0	0	0	0	0	0	0	2.64249	1.25247	5.82205	6.00696	0	0	0	0
-	chr6	30632644	CCAAGCGGGACAAGGACTTTTGG	GCCAAGCGGGACAAGGACTTT	ineffective-gDNA	DHS_21	Promoter_2	-	587	4	0	0	0	0	30	0	7.51709	1.25247	5.82205	6.00696	78.0888	0	0	4.99421
+	chr6	30632645	CAAGCGGGACAAGGACTTTTGGG	GCAAGCGGGACAAGGACTTTT	regulatory-gDNA sequences	DHS_21	Promoter_2	-	0	0	0	0	0	0	0	0	2.64249	1.25247	5.82205	6.00696	0	0	0	0
+	chr6	30632646	AAGCGGGACAAGGACTTTTGGGG	GAAGCGGGACAAGGACTTTTG	regulatory-gDNA sequences	DHS_21	Promoter_2	-	63	154	30	19	145	230	274	106	164.575	23.1743	192.987	136.519	0.382805	1.29454	0.751345	2.00705
+	chr6	30632647	AGCGGGACAAGGACTTTTGGGGG	GAGCGGGACAAGGACTTTTGG	regulatory-gDNA sequences	DHS_21	Promoter_2	-	52	86	0	2	208	125	137	138	95.0739	3.6564	115.445	172.996	0.546943	0	1.80173	0.791924
+	chr6	30632648	GCGGGACAAGGACTTTTGGGGGG	GCGGGACAAGGACTTTTGGG	regulatory-gDNA sequences	DHS_21	Promoter_2	-	11	30	0	0	62	47	47	0	37.8083	1.25247	49.9228	6.00696	0.290941	0	1.24192	7.82426
+	chr6	30632651	GGACAAGGACTTTTGGGGGGAGG	GGACAAGGACTTTTGGGGGG	regulatory-gDNA sequences	DHS_21	Promoter_2	-	1336	2020	791	1524	2999	3610	4614	3724	2353.68	1424.61	2915.81	4071.65	0.567622	0.555238	1.02853	1.1332
+	chr6	30632658	GACTTTTGGGGGGAGGTCAAAGG	GACTTTTGGGGGGAGGTCAA	regulatory-gDNA sequences	DHS_21	Promoter_2	-	0	0	0	0	0	0	0	0	2.64249	1.25247	5.82205	6.00696	0	0	0	0
+	chr6	30632659	ACTTTTGGGGGGAGGTCAAAGGG	GACTTTTGGGGGGAGGTCAAA	regulatory-gDNA sequences	DHS_21	Promoter_2	-	0	0	0	0	0	0	0	0	2.64249	1.25247	5.82205	6.00696	0	0	0	0
+	chr6	30632699	AGCTGTTACCATAGTAACCGAGG	GAGCTGTTACCATAGTAACCG	regulatory-gDNA sequences	DHS_21	Promoter_2	-	88	206	67	140	136	317	235	274	218.678	133.726	255.006	314.023	0.402418	0.501025	0.53332	0.748354
+	chr6	30632704	TTACCATAGTAACCGAGGACCGG	GTTACCATAGTAACCGAGGAC	regulatory-gDNA sequences	DHS_21	Promoter_2	-	69	131	99	119	141	141	140	210	140.632	116.362	127.778	250.467	0.490642	0.850791	1.10347	0.558956
-	chr6	30632707	CCATAGTAACCGAGGACCGGATG	GCCATAGTAACCGAGGACCGG	ineffective-gDNA	DHS_21	Promoter_2	-	154	349	957	302	452	692	733	874	353.955	278.179	554.792	985.674	0.435083	3.44023	0.814719	0.743653
+	chr6	30632710	TAGTAACCGAGGACCGGATGTGG	GTAGTAACCGAGGACCGGATG	regulatory-gDNA sequences	DHS_21	Promoter_2	-	7	39	0	0	228	0	337	194	47.6981	1.25247	5.82205	233.895	0.146757	0	39.1615	1.44082
-	chr6	30632716	CCGAGGACCGGATGTGGCGATCT	GCCGAGGACCGGATGTGGCGA	ineffective-gDNA	DHS_21	Promoter_2	-	132	230	54	98	130	188	466	256	242.992	98.6183	162.687	296.48	0.543227	0.547566	0.79908	1.57177
+	chr6	30632721	GACCGGATGTGGCGATCTTACGG	GACCGGATGTGGCGATCTTA	regulatory-gDNA sequences	DHS_21	Promoter_2	-	0	0	0	0	0	0	0	0	2.64249	1.25247	5.82205	6.00696	0	0	0	0
-	chr6	30632723	CCGGATGTGGCGATCTTACGGTG	GCCGGATGTGGCGATCTTACG	ineffective-gDNA	DHS_21	Promoter_2	-	0	0	0	0	0	0	0	0	2.64249	1.25247	5.82205	6.00696	0	0	0	0
+	chr6	30632742	GGTGCGACAGTCCTCTTCTCAGG	GGTGCGACAGTCCTCTTCTC	regulatory-gDNA sequences	DHS_21	Promoter_2	-	0	0	0	0	0	0	0	0	2.64249	1.25247	5.82205	6.00696	0	0	0	0
-	chr6	30632948	CCGCCGCAGATGTTCTCCGCAAC	GCCGCCGCAGATGTTCTCCGC	ineffective-gDNA	DHS_22	-	-	125	176	208	426	209	344	250	197	187.575	385.353	274.379	237.029	0.6664	0.539765	0.76172	1.05472
-	chr6	30632951	CCGCAGATGTTCTCCGCAACCTT	GCCGCAGATGTTCTCCGCAAC	ineffective-gDNA	DHS_22	-	-	0	0	0	0	0	0	0	0	2.64249	1.25247	5.82205	6.00696	0	0	0	0
+	chr6	30632955	AGATGTTCTCCGCAACCTTCCGG	GAGATGTTCTCCGCAACCTTC	regulatory-gDNA sequences	DHS_22	-	-	0	0	0	0	0	0	0	0	2.64249	1.25247	5.82205	6.00696	0	0	0	0
+	chr6	30632961	TCTCCGCAACCTTCCGGAAGTGG	GTCTCCGCAACCTTCCGGAAG	regulatory-gDNA sequences	DHS_22	-	-	0	0	0	0	0	0	0	0	2.64249	1.25247	5.82205	6.00696	0	0	0	0
-	chr6	30632964	CCGCAACCTTCCGGAAGTGGAAT	GCCGCAACCTTCCGGAAGTGG	ineffective-gDNA	DHS_22	-	-	752	1391	1308	1746	1910	3031	2259	2503	1560.71	1656.2	2459.42	2773.65	0.481833	0.789759	0.776606	0.814452
+	chr6	30632966	GCAACCTTCCGGAAGTGGAATGG	GCAACCTTCCGGAAGTGGAA	regulatory-gDNA sequences	DHS_22	-	-	0	0	0	0	0	0	0	0	2.64249	1.25247	5.82205	6.00696	0	0	0	0
+	chr6	30632969	ACCTTCCGGAAGTGGAATGGCGG	GACCTTCCGGAAGTGGAATGG	regulatory-gDNA sequences	DHS_22	-	-	18	30	60	148	33	166	31	125	37.8083	140.288	146.545	158.325	0.476086	0.427693	0.225187	0.1958
-	chr6	30632970	CCTTCCGGAAGTGGAATGGCGGG	GCCTTCCGGAAGTGGAATGGC	ineffective-gDNA	DHS_22	-	-	177	379	260	484	230	411	330	624	380.739	429.302	323.493	688.798	0.464885	0.605634	0.710989	0.479096
-	chr6	30632974	CCGGAAGTGGAATGGCGGGAGCC	GCCGGAAGTGGAATGGCGGGA	ineffective-gDNA	DHS_22	-	-	0	0	0	0	0	0	0	0	2.64249	1.25247	5.82205	6.00696	0	0	0	0
-	chr6	30632995	CCTCAGCATTGCTGCCCACCGAC	GCCTCAGCATTGCTGCCCACC	ineffective-gDNA	DHS_22	-	-	65	130	133	314	16	273	409	206	139.597	289.611	223.655	246.356	0.465625	0.459237	0.0715387	1.6602
+	chr6	30633002	ATTGCTGCCCACCGACCCCCCGG	GATTGCTGCCCACCGACCCCC	regulatory-gDNA sequences	DHS_22	-	-	2477	835	667	1189	2461	3392	2933	2873	853.794	1073.64	2744.01	3167.05	2.90117	0.62125	0.896861	0.926097
+	chr6	30633008	GCCCACCGACCCCCCGGAAGCGG	GCCCACCGACCCCCCGGAAG	regulatory-gDNA sequences	DHS_22	-	-	0	0	0	0	0	0	0	0	2.64249	1.25247	5.82205	6.00696	0	0	0	0
-	chr6	30633009	CCCACCGACCCCCCGGAAGCGGA	GCCCACCGACCCCCCGGAAGC	ineffective-gDNA	DHS_22	-	-	37	120	329	112	238	209	269	221	129.293	110.501	177.899	261.668	0.286171	2.97735	1.33784	1.02802
-	chr6	30633010	CCACCGACCCCCCGGAAGCGGAA	GCCACCGACCCCCCGGAAGCG	ineffective-gDNA	DHS_22	-	-	222	355	144	405	619	1005	799	633	359.331	368.673	827.687	699.339	0.617815	0.39059	0.747867	1.14251
-	chr6	30633013	CCGACCCCCCGGAAGCGGAAACA	GCCGACCCCCCGGAAGCGGAA	ineffective-gDNA	DHS_22	-	-	0	0	0	0	0	0	0	0	2.64249	1.25247	5.82205	6.00696	0	0	0	0
-	chr6	30633017	CCCCCCGGAAGCGGAAACAGAAT	GCCCCCCGGAAGCGGAAACAG	ineffective-gDNA	DHS_22	-	-	0	0	0	0	0	0	0	0	2.64249	1.25247	5.82205	6.00696	0	0	0	0
-	chr6	30633018	CCCCCGGAAGCGGAAACAGAATC	GCCCCCGGAAGCGGAAACAGA	ineffective-gDNA	DHS_22	-	-	0	0	0	0	0	0	0	0	2.64249	1.25247	5.82205	6.00696	0	0	0	0
-	chr6	30633019	CCCCGGAAGCGGAAACAGAATCC	GCCCCGGAAGCGGAAACAGAA	ineffective-gDNA	DHS_22	-	-	0	0	0	0	0	0	0	0	2.64249	1.25247	5.82205	6.00696	0	0	0	0
-	chr6	30633020	CCCGGAAGCGGAAACAGAATCCC	GCCCGGAAGCGGAAACAGAAT	ineffective-gDNA	DHS_22	-	-	0	0	0	0	0	0	0	0	2.64249	1.25247	5.82205	6.00696	0	0	0	0
-	chr6	30633021	CCGGAAGCGGAAACAGAATCCCC	GCCGGAAGCGGAAACAGAATC	ineffective-gDNA	DHS_22	-	-	0	0	0	0	0	0	0	0	2.64249	1.25247	5.82205	6.00696	0	0	0	0
-	chr6	30633040	CCCCGCGTGCCCCTTCCTCACTA	GCCCCGCGTGCCCCTTCCTCA	ineffective-gDNA	DHS_22	-	-	7	13	0	0	42	112	33	0	18.245	1.25247	105.195	6.00696	0.383668	0	0.399259	5.49363
-	chr6	30633042	CCGCGTGCCCCTTCCTCACTACC	GCCGCGTGCCCCTTCCTCACT	ineffective-gDNA	DHS_22	-	-	7	11	0	0	37	63	98	116	15.8872	1.25247	64.2202	148.051	0.440606	0	0.576142	0.661934
-	chr6	30633055	CCTCACTACCCTCCAAATCCCGC	GCCTCACTACCCTCCAAATCC	ineffective-gDNA	DHS_22	-	-	0	0	0	0	0	0	0	0	2.64249	1.25247	5.82205	6.00696	0	0	0	0
-	chr6	30633063	CCCTCCAAATCCCGCTGCAGCCA	GCCCTCCAAATCCCGCTGCAG	ineffective-gDNA	DHS_22	-	-	201	471	129	78	613	545	897	889	462.607	81.156	430.068	1003.63	0.434494	1.58953	1.42536	0.893758
-	chr6	30633064	CCTCCAAATCCCGCTGCAGCCAT	GCCTCCAAATCCCGCTGCAGC	ineffective-gDNA	DHS_22	-	-	0	0	44	43	0	0	104	85	2.64249	48.3047	5.82205	111.885	0	0.910885	0	0.92953
-	chr6	30633073	CCCGCTGCAGCCATTGCCGCAGA	GCCCGCTGCAGCCATTGCCGC	ineffective-gDNA	DHS_22	-	-	13465	16025	12373	15948	21704	29973	27819	27916	18403.6	14985.4	23365.8	29697.1	0.731649	0.825673	0.92888	0.936757
-	chr6	30633074	CCGCTGCAGCCATTGCCGCAGAC	GCCGCTGCAGCCATTGCCGCA	ineffective-gDNA	DHS_22	-	-	2585	3816	5489	4155	4847	6360	7245	5670	4579.43	4119.14	5078.55	6139	0.564481	1.33256	0.954406	1.18016
-	chr6	30633083	CCATTGCCGCAGACACGATGCCG	GCCATTGCCGCAGACACGATG	ineffective-gDNA	DHS_22	-	-	1461	1407	578	1204	1989	3074	1933	2357	1580.97	1089.4	2493.33	2618.39	0.924118	0.530569	0.797729	0.73824
-	chr6	30633089	CCGCAGACACGATGCCGAAACGA	GCCGCAGACACGATGCCGAAA	ineffective-gDNA	DHS_22	-	-	56	73	323	227	51	233	180	132	82.3068	206.554	195.135	166.249	0.680382	1.56376	0.261358	1.08271
+	chr6	30633236	CTGTCAAGCCCGTCCGGGCA	GCTGTCAAGCCCGTCCGGGCA	control-gDNA sequences	-	-	-	0	0	0	0	0	0	0	0	2.64249	1.25247	5.82205	6.00696	0	0	0	0
+	chr6	30633237	TGTCAAGCCCGTCCGGGCAA	GTGTCAAGCCCGTCCGGGCAA	control-gDNA sequences	-	-	-	0	0	0	0	0	0	0	0	2.64249	1.25247	5.82205	6.00696	0	0	0	0
+	chr6	30633244	CCCGTCCGGGCAAGGGGCTA	GCCCGTCCGGGCAAGGGGCTA	control-gDNA sequences	-	-	-	0	0	0	0	0	0	0	0	2.64249	1.25247	5.82205	6.00696	0	0	0	0
+	chr6	30633454	GCGCAGCCGCAGAACAGTAG	GCGCAGCCGCAGAACAGTAG	control-gDNA sequences	-	-	-	0	0	0	0	0	0	0	0	2.64249	1.25247	5.82205	6.00696	0	0	0	0
+	chr6	30633631	TGTTTTGGATAGCGACGGTA	GTGTTTTGGATAGCGACGGTA	control-gDNA sequences	-	-	-	25	28	0	0	0	0	27	42	35.5494	1.25247	5.82205	59.5473	0.703247	0	0	0.453421
+	chr6	30645364	TGTCCGAACACTCCTGTCAC	GTGTCCGAACACTCCTGTCAC	control-gDNA sequences	-	-	-	332	488	356	574	759	1234	913	993	477.926	494.03	1027.04	1127.98	0.694668	0.720604	0.739016	0.809415
+	chr6	30645365	GTCCGAACACTCCTGTCACA	GTCCGAACACTCCTGTCACA	control-gDNA sequences	-	-	-	2	5	0	0	0	0	39	0	8.72483	1.25247	5.82205	6.00696	0.229231	0	0	6.49247
+	chr6	30646954	TTGAGTCTCGCGGCGTCGGG	GTTGAGTCTCGCGGCGTCGGG	control-gDNA sequences	-	-	-	3251	4160	2717	3374	7018	8983	9049	7524	4999.41	3330.57	7134.14	8107.15	0.650276	0.815775	0.983721	1.11618
-	chr6	30646955	TCCCGACGCCGCGAGACTCA	GTCCCGACGCCGCGAGACTCA	control-gDNA sequences	-	-	-	19	142	70	144	120	83	627	205	152.054	137.009	81.4429	245.325	0.124956	0.510916	1.47343	2.55579
+	chr6	30646960	CTCGCGGCGTCGGGAGGTCACGG	GCTCGCGGCGTCGGGAGGTCA	regulatory-gDNA sequences	DHS_23	Promoter_3	-	139	135	41	82	81	215	324	452	144.777	84.7044	182.221	491.431	0.960095	0.484036	0.444515	0.659299
+	chr6	30646967	CGTCGGGAGGTCACGGCGTCAGG	GCGTCGGGAGGTCACGGCGTC	regulatory-gDNA sequences	DHS_23	Promoter_3	-	269	274	267	228	488	772	826	788	285.383	207.439	623.921	882.872	0.942593	1.28713	0.782151	0.935583
-	chr6	30646993	CCCAGACAGTCGTAAACGCCATG	GCCCAGACAGTCGTAAACGCC	ineffective-gDNA	DHS_23	Promoter_3	-	491	734	123	240	1185	1953	1264	992	727.369	218.202	1608.73	1126.78	0.675035	0.563697	0.736605	1.12178
-	chr6	30646994	CCAGACAGTCGTAAACGCCATGT	GCCAGACAGTCGTAAACGCCA	ineffective-gDNA	DHS_23	Promoter_3	-	21	20	0	0	50	28	33	0	26.3954	1.25247	32.4976	6.00696	0.795594	0	1.53857	5.49363
+	chr6	30647008	ACGCCATGTGTTTACGCGACTGG	GACGCCATGTGTTTACGCGAC	regulatory-gDNA sequences	DHS_23	Promoter_3	-	40	110	2978	297	280	204	302	243	119.082	273.336	174.29	283.677	0.335904	10.895	1.60652	1.06459
-	chr6	30647011	CCATGTGTTTACGCGACTGGAGC	GCCATGTGTTTACGCGACTGG	ineffective-gDNA	DHS_23	Promoter_3	-	635	1187	2087	1932	2451	2334	2499	2441	1301.99	1849.62	1909.54	2707.72	0.487714	1.12834	1.28356	0.922918
+	chr6	30647017	GTTTACGCGACTGGAGCAAGCGG	GTTTACGCGACTGGAGCAAG	regulatory-gDNA sequences	DHS_23	Promoter_3	-	0	18	0	0	61	32	0	56	24.0817	1.25247	36.2083	76.8779	0	0	1.6847	0
+	chr6	30647024	CGACTGGAGCAAGCGGACGCCGG	GCGACTGGAGCAAGCGGACGC	regulatory-gDNA sequences	DHS_23	Promoter_3	-	14	58	0	0	123	64	40	32	67.4151	1.25247	65.0996	47.0146	0.207669	0	1.88941	0.8508
-	chr6	30647043	CCGGCCCCGCTCCGTCATTGCAG	GCCGGCCCCGCTCCGTCATTG	ineffective-gDNA	DHS_23	Promoter_3	-	3133	4228	7109	4659	7229	8223	7048	7149	5082.2	4623.08	6539.25	7709.17	0.616466	1.53772	1.10548	0.914236
+	chr6	30647044	CGGCCCCGCTCCGTCATTGCAGG	GCGGCCCCGCTCCGTCATTGC	regulatory-gDNA sequences	DHS_23	Promoter_3	-	2709	3618	4841	4142	4047	4747	5949	5195	4336.79	4106.09	3810.97	5634.53	0.624656	1.17898	1.06193	1.05581
-	chr6	30647047	CCCCGCTCCGTCATTGCAGGCCA	GCCCCGCTCCGTCATTGCAGG	ineffective-gDNA	DHS_23	Promoter_3	-	32	93	5	7	249	206	6	328	101.993	9.56255	175.735	366.063	0.313747	0.522873	1.41691	0.0163906
-	chr6	30647048	CCCGCTCCGTCATTGCAGGCCAC	GCCCGCTCCGTCATTGCAGGC	ineffective-gDNA	DHS_23	Promoter_3	-	600	1112	503	1026	2144	1950	2138	2173	1206.69	902.213	1606.36	2422.71	0.49723	0.557518	1.33469	0.882482
-	chr6	30647049	CCGCTCCGTCATTGCAGGCCACG	GCCGCTCCGTCATTGCAGGCC	ineffective-gDNA	DHS_23	Promoter_3	-	2832	4664	2551	4680	7874	9911	9271	8620	5611.15	4643.99	7859.75	9270.01	0.504709	0.549312	1.00181	1.00011
-	chr6	30647054	CCGTCATTGCAGGCCACGCCTCC	GCCGTCATTGCAGGCCACGCC	ineffective-gDNA	DHS_23	Promoter_3	-	1573	1750	1221	1938	2398	3655	3740	3446	2014.17	1855.85	2951.26	3776.18	0.780969	0.657918	0.812534	0.990419
+	chr6	30647065	GGCCACGCCTCCACTGAACCAGG	GGCCACGCCTCCACTGAACC	regulatory-gDNA sequences	DHS_23	Promoter_3	-	0	0	0	0	0	0	0	0	2.64249	1.25247	5.82205	6.00696	0	0	0	0
+	chr6	30647066	GCCACGCCTCCACTGAACCAGGG	GCCACGCCTCCACTGAACCA	regulatory-gDNA sequences	DHS_23	Promoter_3	-	0	0	0	0	0	0	0	0	2.64249	1.25247	5.82205	6.00696	0	0	0	0
-	chr6	30647067	CCACGCCTCCACTGAACCAGGGC	GCCACGCCTCCACTGAACCAG	ineffective-gDNA	DHS_23	Promoter_3	-	0	0	0	0	0	0	0	0	2.64249	1.25247	5.82205	6.00696	0	0	0	0
-	chr6	30647072	CCTCCACTGAACCAGGGCCACGC	GCCTCCACTGAACCAGGGCCA	ineffective-gDNA	DHS_23	Promoter_3	-	345	581	264	515	523	1290	815	979	564.687	451.879	1075.01	1111.27	0.610958	0.584227	0.486506	0.733398
-	chr6	30647083	CCAGGGCCACGCCCCCGAGATGA	GCCAGGGCCACGCCCCCGAGA	ineffective-gDNA	DHS_23	Promoter_3	-	0	0	0	0	0	0	0	0	2.64249	1.25247	5.82205	6.00696	0	0	0	0
+	chr6	30647086	GGGCCACGCCCCCGAGATGACGG	GGGCCACGCCCCCGAGATGA	regulatory-gDNA sequences	DHS_23	Promoter_3	-	0	0	0	0	0	0	0	0	2.64249	1.25247	5.82205	6.00696	0	0	0	0
-	chr6	30647089	CCACGCCCCCGAGATGACGGCGA	GCCACGCCCCCGAGATGACGG	ineffective-gDNA	DHS_23	Promoter_3	-	92	152	5	10	127	389	420	277	162.485	13.0382	307.154	316.93	0.566207	0.383488	0.413474	1.32521
-	chr6	30647094	CCCCCGAGATGACGGCGAAGCTC	GCCCCCGAGATGACGGCGAAG	ineffective-gDNA	DHS_23	Promoter_3	-	24	69	34	104	211	115	118	275	78.3674	103.74	107.58	314.992	0.30625	0.327742	1.96133	0.374613
-	chr6	30647095	CCCCGAGATGACGGCGAAGCTCG	GCCCCGAGATGACGGCGAAGC	ineffective-gDNA	DHS_23	Promoter_3	-	0	0	0	0	0	0	0	0	2.64249	1.25247	5.82205	6.00696	0	0	0	0
-	chr6	30647096	CCCGAGATGACGGCGAAGCTCGC	GCCCGAGATGACGGCGAAGCT	ineffective-gDNA	DHS_23	Promoter_3	-	0	0	0	0	0	0	0	0	2.64249	1.25247	5.82205	6.00696	0	0	0	0
-	chr6	30647097	CCGAGATGACGGCGAAGCTCGCA	GCCGAGATGACGGCGAAGCTC	ineffective-gDNA	DHS_23	Promoter_3	-	0	0	0	0	0	0	0	0	2.64249	1.25247	5.82205	6.00696	0	0	0	0
+	chr6	30647111	AAGCTCGCACGTGCGCAGCCCGG	GAAGCTCGCACGTGCGCAGCC	regulatory-gDNA sequences	DHS_23	Promoter_3	-	0	0	0	0	0	0	0	0	2.64249	1.25247	5.82205	6.00696	0	0	0	0
+	chr6	30647112	AGCTCGCACGTGCGCAGCCCGGG	GAGCTCGCACGTGCGCAGCCC	regulatory-gDNA sequences	DHS_23	Promoter_3	-	14	34	64	75	0	0	46	80	42.257	78.4725	5.82205	105.933	0.331306	0.815572	0	0.434238
+	chr6	30647113	GCTCGCACGTGCGCAGCCCGGGG	GCTCGCACGTGCGCAGCCCG	regulatory-gDNA sequences	DHS_23	Promoter_3	-	0	0	0	0	0	0	0	0	2.64249	1.25247	5.82205	6.00696	0	0	0	0
+	chr6	30647114	CTCGCACGTGCGCAGCCCGGGGG	GCTCGCACGTGCGCAGCCCGG	regulatory-gDNA sequences	DHS_23	Promoter_3	-	0	0	0	0	0	0	0	0	2.64249	1.25247	5.82205	6.00696	0	0	0	0
+	chr6	30647117	GCACGTGCGCAGCCCGGGGGCGG	GCACGTGCGCAGCCCGGGGG	regulatory-gDNA sequences	DHS_23	Promoter_3	-	0	0	0	0	0	0	0	0	2.64249	1.25247	5.82205	6.00696	0	0	0	0
+	chr6	30647118	CACGTGCGCAGCCCGGGGGCGGG	GCACGTGCGCAGCCCGGGGGC	regulatory-gDNA sequences	DHS_23	Promoter_3	-	27	72	79	76	289	167	68	63	81.3232	79.3692	147.285	85.4372	0.332008	0.995348	1.96218	0.795906
-	chr6	30647210	ACAGCTACTGTGGCGGCGCC	GACAGCTACTGTGGCGGCGCC	control-gDNA sequences	-	-	-	3498	4596	5813	4838	8280	9921	9006	8916	5528.86	4801.13	7867.56	9583.99	0.63268	1.21076	1.05242	0.939692
+	chr6	30647399	CGAGACTGACCGGGCCCCTGCGG	GCGAGACTGACCGGGCCCCTG	regulatory-gDNA sequences	DHS_24	-	-	760	950	633	1040	903	1225	2006	1505	1000.47	916.954	1019.29	1712.18	0.759641	0.690329	0.885909	1.17161
+	chr6	30647400	GAGACTGACCGGGCCCCTGCGGG	GAGACTGACCGGGCCCCTGC	regulatory-gDNA sequences	DHS_24	-	-	520	808	625	1130	2306	1908	1219	1752	819.321	1011.64	1573.19	1974.93	0.634672	0.617808	1.46581	0.617237
-	chr6	30647408	CCGGGCCCCTGCGGGAGTTACTG	GCCGGGCCCCTGCGGGAGTTA	ineffective-gDNA	DHS_24	-	-	455	897	901	834	658	1355	1324	1143	932.903	701.703	1130.1	1305.65	0.487725	1.28402	0.58225	1.01405
-	chr6	30647413	CCCCTGCGGGAGTTACTGCGCAT	GCCCCTGCGGGAGTTACTGCG	ineffective-gDNA	DHS_24	-	-	214	567	481	782	830	1120	2158	750	551.209	653.858	928.266	837.6	0.388237	0.735634	0.894141	2.57641
-	chr6	30647414	CCCTGCGGGAGTTACTGCGCATG	GCCCTGCGGGAGTTACTGCGC	ineffective-gDNA	DHS_24	-	-	64	140	72	77	440	220	388	317	149.972	80.2637	185.815	355.472	0.426746	0.897043	2.36794	1.09151
-	chr6	30647415	CCTGCGGGAGTTACTGCGCATGC	GCCTGCGGGAGTTACTGCGCA	ineffective-gDNA	DHS_24	-	-	1868	2602	1297	2112	4299	4364	3957	4612	3081.11	2036.28	3509.59	5015.23	0.606276	0.636945	1.22493	0.788997
+	chr6	30647424	GTTACTGCGCATGCGTGCCGTGG	GTTACTGCGCATGCGTGCCG	regulatory-gDNA sequences	DHS_24	-	-	6155	6694	4844	8092	11346	14063	12672	13266	8033.15	7955.87	11096.2	14195	0.7662	0.608859	1.02251	0.892708
+	chr6	30647425	TTACTGCGCATGCGTGCCGTGGG	GTTACTGCGCATGCGTGCCGT	regulatory-gDNA sequences	DHS_24	-	-	4744	4796	2416	4450	5842	7232	7211	7054	5770.67	4414.57	5762.69	7608.34	0.822088	0.547278	1.01376	0.947776
+	chr6	30647430	GCGCATGCGTGCCGTGGGCCCGG	GCGCATGCGTGCCGTGGGCC	regulatory-gDNA sequences	DHS_24	-	-	357	707	220	408	725	1107	1253	1180	696.174	371.086	916.93	1348.92	0.512803	0.592854	0.790682	0.928889
+	chr6	30647431	CGCATGCGTGCCGTGGGCCCGGG	GCGCATGCGTGCCGTGGGCCC	regulatory-gDNA sequences	DHS_24	-	-	1331	561	587	1065	799	1183	1601	1010	545.486	943.269	983.011	1148.25	2.44002	0.622304	0.812809	1.3943
+	chr6	30647434	ATGCGTGCCGTGGGCCCGGGAGG	GATGCGTGCCGTGGGCCCGGG	regulatory-gDNA sequences	DHS_24	-	-	132	236	25	56	249	474	511	130	248.953	60.9455	371.912	163.991	0.53022	0.410203	0.669514	3.11602
-	chr6	30647441	CCGTGGGCCCGGGAGGAGTTTGC	GCCGTGGGCCCGGGAGGAGTT	ineffective-gDNA	DHS_24	-	-	887	305	95	110	343	469	323	452	314.098	108.818	367.965	491.431	2.82396	0.873021	0.932155	0.657265
+	chr6	30647444	TGGGCCCGGGAGGAGTTTGCCGG	GTGGGCCCGGGAGGAGTTTGC	regulatory-gDNA sequences	DHS_24	-	-	5224	4008	2347	4040	6191	8150	6650	7380	4814.08	4003.62	6482.08	7954.33	1.08515	0.58622	0.955094	0.836023
+	chr6	30647445	GGGCCCGGGAGGAGTTTGCCGGG	GGGCCCGGGAGGAGTTTGCC	regulatory-gDNA sequences	DHS_24	-	-	0	0	0	0	0	0	0	0	2.64249	1.25247	5.82205	6.00696	0	0	0	0
+	chr6	30647446	GGCCCGGGAGGAGTTTGCCGGGG	GGCCCGGGAGGAGTTTGCCG	regulatory-gDNA sequences	DHS_24	-	-	0	2	2	0	1	69	0	36	5.0887	1.25247	69.4668	52.0428	0	1.59684	0.0143954	0
-	chr6	30647448	CCCGGGAGGAGTTTGCCGGGGAG	GCCCGGGAGGAGTTTGCCGGG	ineffective-gDNA	DHS_24	-	-	728	664	471	1070	888	949	1478	1423	648.922	948.531	778.58	1624.03	1.12186	0.496557	1.14054	0.91008
+	chr6	30647449	CCGGGAGGAGTTTGCCGGGGAGG	GCCGGGAGGAGTTTGCCGGGG	regulatory-gDNA sequences	DHS_24	-	-	161	476	93	150	882	1230	1034	1126	467.101	141.926	1023.6	1285.68	0.344679	0.65527	0.861666	0.804244
+	chr6	30647454	AGGAGTTTGCCGGGGAGGAGTGG	GAGGAGTTTGCCGGGGAGGAG	regulatory-gDNA sequences	DHS_24	-	-	54	112	72	102	160	125	325	165	121.116	102.038	115.445	202.866	0.445855	0.70562	1.38594	1.60205
+	chr6	30647455	GGAGTTTGCCGGGGAGGAGTGGG	GGAGTTTGCCGGGGAGGAGT	regulatory-gDNA sequences	DHS_24	-	-	0	0	0	0	0	0	0	0	2.64249	1.25247	5.82205	6.00696	0	0	0	0
+	chr6	30647460	TTGCCGGGGAGGAGTGGGTTTGG	GTTGCCGGGGAGGAGTGGGTT	regulatory-gDNA sequences	DHS_24	-	-	1860	1683	1037	1966	2942	3876	3672	3579	1929.71	1884.92	3125.35	3917.54	0.963874	0.550156	0.941334	0.937322
-	chr6	30647463	CCGGGGAGGAGTGGGTTTGGAAT	GCCGGGGAGGAGTGGGTTTGG	ineffective-gDNA	DHS_24	-	-	35	86	0	0	216	113	25	118	95.0739	1.25247	105.991	150.343	0.368135	0	2.0379	0.166287
+	chr6	30647466	GGGAGGAGTGGGTTTGGAATCGG	GGGAGGAGTGGGTTTGGAAT	regulatory-gDNA sequences	DHS_24	-	-	0	0	0	0	0	0	0	0	2.64249	1.25247	5.82205	6.00696	0	0	0	0
+	chr6	30647475	GGGTTTGGAATCGGGGTTAAAGG	GGGTTTGGAATCGGGGTTAA	regulatory-gDNA sequences	DHS_24	-	-	0	0	0	0	0	0	0	0	2.64249	1.25247	5.82205	6.00696	0	0	0	0
-	chr6	30647506	CCAGATGTCGCACGTGACCTAAG	GCCAGATGTCGCACGTGACCT	ineffective-gDNA	DHS_24	-	-	37	52	0	0	0	78	0	27	61.3246	1.25247	77.207	40.7001	0.603347	0	0	0
+	chr6	30647515	GCACGTGACCTAAGTGAGACTGG	GCACGTGACCTAAGTGAGAC	regulatory-gDNA sequences	DHS_24	-	-	0	0	0	0	0	0	0	0	2.64249	1.25247	5.82205	6.00696	0	0	0	0
+	chr6	30647516	CACGTGACCTAAGTGAGACTGGG	GCACGTGACCTAAGTGAGACT	regulatory-gDNA sequences	DHS_24	-	-	0	49	0	0	0	0	0	23	58.2377	1.25247	5.82205	35.6247	0	0	0	0
-	chr6	30647523	CCTAAGTGAGACTGGGCGAGATA	GCCTAAGTGAGACTGGGCGAG	ineffective-gDNA	DHS_24	-	-	254	598	709	896	546	1181	1258	1316	581.304	765.18	981.278	1505.15	0.436949	0.926579	0.556417	0.835797
+	chr6	30648576	GATCATCGTGAATTAGCAAG	GATCATCGTGAATTAGCAAG	control-gDNA sequences	-	-	-	0	0	0	0	0	0	0	0	2.64249	1.25247	5.82205	6.00696	0	0	0	0
+	chr6	30653841	AGCGAGATACCCGAAAAGGC	GAGCGAGATACCCGAAAAGGC	control-gDNA sequences	-	-	-	0	0	0	0	0	0	0	0	2.64249	1.25247	5.82205	6.00696	0	0	0	0
-	chr6	30654307	GATCCGATTCTTCTCCGGCT	GATCCGATTCTTCTCCGGCT	control-gDNA sequences	-	-	-	4	33	47	112	70	44	75	15	41.1532	110.501	47.2043	25.4083	0.0971978	0.425335	1.48292	2.95179
+	chr6	30655008	TTCGCTATCTAGTCTGAAGC	GTTCGCTATCTAGTCTGAAGC	control-gDNA sequences	-	-	-	0	0	0	0	0	0	0	0	2.64249	1.25247	5.82205	6.00696	0	0	0	0
-	chr6	30655564	CATGCTCCTCCATTTACGAC	GCATGCTCCTCCATTTACGAC	control-gDNA sequences	-	-	-	0	0	0	0	0	0	0	0	2.64249	1.25247	5.82205	6.00696	0	0	0	0
+	chr6	30658312	CAACTAGGGGACATGCGATT	GCAACTAGGGGACATGCGATT	control-gDNA sequences	-	-	-	107	100	109	218	324	416	306	432	108.983	198.67	327.242	469.958	0.981804	0.54865	0.990092	0.651122
+	chr6	30658327	CGATTGGGGACACGAAGGAA	GCGATTGGGGACACGAAGGAA	control-gDNA sequences	-	-	-	0	0	0	0	0	0	0	0	2.64249	1.25247	5.82205	6.00696	0	0	0	0
-	chr6	30658892	GGCGGGAGGACATCTCCGCC	GGCGGGAGGACATCTCCGCC	control-gDNA sequences	-	-	-	11	10	0	0	0	1	0	2	14.703	1.25247	6.79725	8.61293	0.748146	0	0	0
-	chr6	30659419	GGCGGCCGGCTACAATGTAC	GGCGGCCGGCTACAATGTAC	control-gDNA sequences	-	-	-	3	52	0	0	0	0	0	0	61.3246	1.25247	5.82205	6.00696	0.04892	0	0	0
+	chr6	30659423	ATTGTAGCCGGCCGCCGCTA	GATTGTAGCCGGCCGCCGCTA	control-gDNA sequences	-	-	-	68	67	1727	49	270	126	180	86	76.3912	54.2133	116.224	113.071	0.890155	31.8556	2.3231	1.59192
-	chr6	30659437	GTCCTACCAGCCCGTAGCGG	GTCCTACCAGCCCGTAGCGG	control-gDNA sequences	-	-	-	0	0	0	0	0	0	0	0	2.64249	1.25247	5.82205	6.00696	0	0	0	0
+	chr6	30659441	TACGGGCTGGTAGGACCCAA	GTACGGGCTGGTAGGACCCAA	control-gDNA sequences	-	-	-	0	0	0	0	0	0	0	0	2.64249	1.25247	5.82205	6.00696	0	0	0	0
-	chr6	30661408	CCTATAGTAGTGGAGCCGCT	GCCTATAGTAGTGGAGCCGCT	control-gDNA sequences	-	-	-	0	1	0	0	0	0	0	0	3.86787	1.25247	5.82205	6.00696	0	0	0	0
-	chr6	30661409	CCCTATAGTAGTGGAGCCGC	GCCCTATAGTAGTGGAGCCGC	control-gDNA sequences	-	-	-	162	226	267	388	552	573	925	445	238.989	354.798	453.544	483.838	0.677854	0.752541	1.21708	1.9118
-	chr6	30661831	CGCGGCAGTCCTTGAAATGT	GCGCGGCAGTCCTTGAAATGT	control-gDNA sequences	-	-	-	0	0	0	0	0	0	0	0	2.64249	1.25247	5.82205	6.00696	0	0	0	0
+	chr6	30661832	CATTTCAAGGACTGCCGCGC	GCATTTCAAGGACTGCCGCGC	control-gDNA sequences	-	-	-	1870	3016	1494	2971	3505	6040	3736	4542	3594.93	2919.98	4827.29	4940.86	0.520177	0.511648	0.72608	0.756144
-	chr6	30661981	TGTACTCCTTAGGGCGCTTC	GTGTACTCCTTAGGGCGCTTC	control-gDNA sequences	-	-	-	275	656	296	285	714	1224	1537	858	640.431	261.513	1018.43	966.527	0.429398	1.13188	0.701078	1.59023
+	chr6	30662227	AGGTGTGACATTCGGCTACC	GAGGTGTGACATTCGGCTACC	control-gDNA sequences	-	-	-	63	258	34	160	622	650	814	639	270.295	150.116	518.811	706.376	0.233079	0.226491	1.19889	1.15236
-	chr6	30664594	TCACGAATGGTACATCGTAA	GTCACGAATGGTACATCGTAA	control-gDNA sequences	-	-	-	0	0	0	0	0	0	0	0	2.64249	1.25247	5.82205	6.00696	0	0	0	0
+	chr6	30664605	CATTCGTGAGTCTCGCTGTA	GCATTCGTGAGTCTCGCTGTA	control-gDNA sequences	-	-	-	66	132	34	38	52	172	138	136	141.667	43.2751	150.976	170.752	0.46588	0.785671	0.344426	0.80819
+	chr6	30665127	GTTGGTGTATGGACGAGGTC	GTTGGTGTATGGACGAGGTC	control-gDNA sequences	-	-	-	29	40	13	48	16	121	43	47	48.7715	53.2378	112.314	65.7671	0.59461	0.244188	0.142457	0.653822
+	chr6	30665663	CGCAAGTGCCTGGGCCGCTT	GCGCAAGTGCCTGGGCCGCTT	control-gDNA sequences	-	-	-	302	765	255	638	960	1410	1304	1176	764.803	539.99	1176.12	1344.26	0.394873	0.472231	0.816243	0.970052
-	chr6	30670603	ATATAAGGCCCCGTGTGTAT	GATATAAGGCCCCGTGTGTAT	control-gDNA sequences	-	-	-	5	24	8	12	188	69	79	94	30.991	15.3278	69.4668	122.513	0.161337	0.521927	2.70633	0.64483
+	chr6	30671400	AAGATAGACCCCGTTGCACC	GAAGATAGACCCCGTTGCACC	control-gDNA sequences	-	-	-	101	141	163	335	223	599	328	433	151.013	308.994	475.472	471.016	0.668818	0.527517	0.469008	0.696367
+	chr6	30671402	GATAGACCCCGTTGCACCTG	GATAGACCCCGTTGCACCTG	control-gDNA sequences	-	-	-	0	5	0	22	30	3	87	64	8.72483	26.4605	8.74242	86.6542	0	0	3.43155	1.00399
+	chr6	30673179	ACCAAGCCTGGGCAAGGGGAAGG	GACCAAGCCTGGGCAAGGGGA	regulatory-gDNA sequences	CTCF_10	DHS_25	-	39	48	7	18	1	31	175	185	57.2017	22.0689	35.2828	224.41	0.681797	0.317188	0.0283424	0.779821
-	chr6	30673211	CCACTTTGGGCCTACATGCAGTG	GCCACTTTGGGCCTACATGCA	ineffective-gDNA	CTCF_10	DHS_25	-	279	425	136	253	186	425	598	558	421.576	230.205	334.027	612.019	0.661802	0.590777	0.556841	0.977094
+	chr6	30673214	CTTTGGGCCTACATGCAGTGAGG	GCTTTGGGCCTACATGCAGTG	regulatory-gDNA sequences	CTCF_10	DHS_25	-	200	129	172	305	265	425	313	310	138.564	281.062	334.027	348.739	1.44338	0.611964	0.793349	0.897518
-	chr6	30673237	CCTTTCAGATACTGATAAAACAT	GCCTTTCAGATACTGATAAAA	ineffective-gDNA	CTCF_10	DHS_25	-	0	0	0	0	0	0	0	0	2.64249	1.25247	5.82205	6.00696	0	0	0	0
+	chr6	30673255	AACATTGTTGCCCCCTCATGTGG	GAACATTGTTGCCCCCTCATG	regulatory-gDNA sequences	CTCF_10	DHS_25	-	1662	635	236	348	978	835	1488	739	618.55	320.621	678.778	824.522	2.68693	0.736071	1.44082	1.80468
-	chr6	30673267	CCCTCATGTGGCCAATGCTGGAA	GCCCTCATGTGGCCAATGCTG	ineffective-gDNA	CTCF_10	DHS_25	-	305	517	535	1140	588	1005	1321	1550	504.366	1022.15	827.687	1760.05	0.604719	0.523405	0.710413	0.750548
-	chr6	30673268	CCTCATGTGGCCAATGCTGGAAA	GCCTCATGTGGCCAATGCTGG	ineffective-gDNA	CTCF_10	DHS_25	-	114	342	92	117	583	723	357	349	347.669	114.692	581.496	386.374	0.327898	0.802146	1.00259	0.923974
+	chr6	30673292	ACAGCTGAGACACGTATTCCAGG	GACAGCTGAGACACGTATTCC	regulatory-gDNA sequences	CTCF_10	DHS_25	-	219	249	19	46	145	534	358	325	261.67	51.2757	420.887	363.172	0.836932	0.370546	0.344511	0.985758
+	chr6	30673293	CAGCTGAGACACGTATTCCAGGG	GCAGCTGAGACACGTATTCCA	regulatory-gDNA sequences	CTCF_10	DHS_25	-	0	2	4	0	0	23	0	0	5.0887	1.25247	27.8258	6.00696	0	3.19369	0	0
-	chr6	30673310	CCAGGGCAGTGTAGCAGCCTCAG	GCCAGGGCAGTGTAGCAGCCT	ineffective-gDNA	CTCF_10	DHS_25	-	377	507	346	628	796	1284	1115	888	495.199	532.72	1069.89	1002.43	0.76131	0.649497	0.743999	1.1123
+	chr6	30673317	AGTGTAGCAGCCTCAGCAACTGG	GAGTGTAGCAGCCTCAGCAAC	regulatory-gDNA sequences	CTCF_10	DHS_25	-	57	64	58	121	22	197	218	74	73.4161	118.029	169.224	98.7454	0.776396	0.491405	0.130005	2.2077
+	chr6	30673318	GTGTAGCAGCCTCAGCAACTGGG	GTGTAGCAGCCTCAGCAACT	regulatory-gDNA sequences	CTCF_10	DHS_25	-	4	22	58	63	59	149	0	33	28.6982	67.52	133.844	48.2736	0.139382	0.859005	0.440812	0
-	chr6	30676620	CATCCGGTGCAAGTTTTAGC	GCATCCGGTGCAAGTTTTAGC	control-gDNA sequences	-	-	-	102	146	274	438	398	455	185	312	156.222	394.679	357.017	350.663	0.652917	0.694234	1.11479	0.527572
+	chr6	30676926	ATGTGGGGACCCGCAATAGA	GATGTGGGGACCCGCAATAGA	control-gDNA sequences	-	-	-	0	0	0	0	0	0	0	0	2.64249	1.25247	5.82205	6.00696	0	0	0	0
-	chr6	30677478	CCTTGTCCATGACATCCTGAGAA	GCCTTGTCCATGACATCCTGA	ineffective-gDNA	DHS_26	-	-	0	0	0	0	0	0	0	0	2.64249	1.25247	5.82205	6.00696	0	0	0	0
+	chr6	30677502	TGTCTTTCAGAGACAATCTTGGG	GTGTCTTTCAGAGACAATCTT	regulatory-gDNA sequences	DHS_26	-	-	0	0	0	0	0	0	0	0	2.64249	1.25247	5.82205	6.00696	0	0	0	0
+	chr6	30677503	GTCTTTCAGAGACAATCTTGGGG	GTCTTTCAGAGACAATCTTG	regulatory-gDNA sequences	DHS_26	-	-	0	0	0	0	0	0	0	0	2.64249	1.25247	5.82205	6.00696	0	0	0	0
+	chr6	30677509	CAGAGACAATCTTGGGGATTTGG	GCAGAGACAATCTTGGGGATT	regulatory-gDNA sequences	DHS_26	-	-	179	264	123	194	353	380	708	729	275.976	178.214	300.536	812.644	0.648606	0.69018	1.17457	0.87123
+	chr6	30677512	AGACAATCTTGGGGATTTGGGGG	GAGACAATCTTGGGGATTTGG	regulatory-gDNA sequences	DHS_26	-	-	567	256	180	425	141	398	1253	722	268.392	384.57	313.808	804.336	2.11258	0.468056	0.449319	1.55781
+	chr6	30677547	TAGGAACTGCTATGCATACTAGG	GTAGGAACTGCTATGCATACT	regulatory-gDNA sequences	DHS_26	-	-	0	0	0	0	0	0	0	0	2.64249	1.25247	5.82205	6.00696	0	0	0	0
+	chr6	30677562	ATACTAGGACATCAAAGAGACGG	GATACTAGGACATCAAAGAGA	regulatory-gDNA sequences	DHS_26	-	-	0	0	0	0	0	0	0	0	2.64249	1.25247	5.82205	6.00696	0	0	0	0
+	chr6	30677563	TACTAGGACATCAAAGAGACGGG	GTACTAGGACATCAAAGAGAC	regulatory-gDNA sequences	DHS_26	-	-	0	0	0	0	0	0	0	0	2.64249	1.25247	5.82205	6.00696	0	0	0	0
-	chr6	30677588	CCTCACGTTCTGCCTAGCTACCA	GCCTCACGTTCTGCCTAGCTA	ineffective-gDNA	DHS_26	-	-	0	0	0	0	0	0	0	0	2.64249	1.25247	5.82205	6.00696	0	0	0	0
-	chr6	30677600	CCTAGCTACCAACAGTAGTGACT	GCCTAGCTACCAACAGTAGTG	ineffective-gDNA	DHS_26	-	-	60	116	117	164	436	295	477	265	125.196	153.395	239.313	305.274	0.479247	0.762738	1.82188	1.56253
-	chr6	30677608	CCAACAGTAGTGACTCTCACCCA	GCCAACAGTAGTGACTCTCAC	ineffective-gDNA	DHS_26	-	-	0	0	0	0	0	0	0	0	2.64249	1.25247	5.82205	6.00696	0	0	0	0
-	chr6	30677627	CCCACTCCCCAAAAGCTTGTATG	GCCCACTCCCCAAAAGCTTGT	ineffective-gDNA	DHS_26	-	-	9	79	0	0	55	73	108	43	88.1977	1.25247	72.9257	60.7937	0.102044	0	0.754193	1.7765
+	chr6	30677628	CCACTCCCCAAAAGCTTGTATGG	GCCACTCCCCAAAAGCTTGTA	regulatory-gDNA sequences	DHS_26	-	-	0	0	0	0	0	0	0	0	2.64249	1.25247	5.82205	6.00696	0	0	0	0
+	chr6	30677629	CACTCCCCAAAAGCTTGTATGGG	GCACTCCCCAAAAGCTTGTAT	regulatory-gDNA sequences	DHS_26	-	-	0	0	0	0	0	0	0	0	2.64249	1.25247	5.82205	6.00696	0	0	0	0
-	chr6	30677633	CCCCAAAAGCTTGTATGGGACAA	GCCCCAAAAGCTTGTATGGGA	ineffective-gDNA	DHS_26	-	-	0	2	0	0	295	19	187	0	5.0887	1.25247	24.0608	6.00696	0	0	12.2606	31.1306
-	chr6	30677634	CCCAAAAGCTTGTATGGGACAAC	GCCCAAAAGCTTGTATGGGAC	ineffective-gDNA	DHS_26	-	-	0	0	0	0	0	0	0	0	2.64249	1.25247	5.82205	6.00696	0	0	0	0
-	chr6	30677635	CCAAAAGCTTGTATGGGACAACC	GCCAAAAGCTTGTATGGGACA	ineffective-gDNA	DHS_26	-	-	58	152	189	229	306	546	189	132	162.485	208.325	430.904	166.249	0.356956	0.907236	0.710135	1.13685
+	chr6	30677641	GCTTGTATGGGACAACCAAAAGG	GCTTGTATGGGACAACCAAA	regulatory-gDNA sequences	DHS_26	-	-	0	0	0	0	0	0	0	0	2.64249	1.25247	5.82205	6.00696	0	0	0	0
+	chr6	30677648	TGGGACAACCAAAAGGCATATGG	GTGGGACAACCAAAAGGCATA	regulatory-gDNA sequences	DHS_26	-	-	0	0	0	0	0	0	0	0	2.64249	1.25247	5.82205	6.00696	0	0	0	0
-	chr6	30678284	CGGCCTCTATGGTATGGTCC	GCGGCCTCTATGGTATGGTCC	control-gDNA sequences	-	-	-	88	333	285	716	97	483	525	484	339.56	598.997	379.067	527.23	0.259159	0.475795	0.255891	0.995771
-	chr6	30678284	GGACCATACCATAGAGGCCG	GGACCATACCATAGAGGCCG	control-gDNA sequences	-	-	-	1464	1470	1014	1900	3394	3562	3074	2550	1660.69	1816.39	2877.98	2823.62	0.881559	0.558251	1.1793	1.08867
+	chr6	30678326	CGCATTGGGCCACCCCGCAT	GCGCATTGGGCCACCCCGCAT	control-gDNA sequences	-	-	-	12	22	0	0	0	93	37	51	28.6982	1.25247	89.7845	70.72	0.418145	0	0	0.52319
+	chr6	30678335	CCACCCCGCATAGGGTCGCC	GCCACCCCGCATAGGGTCGCC	control-gDNA sequences	-	-	-	13364	16273	14666	18528	21779	32393	30305	27254	18664.4	17133.1	25216.6	28997	0.716015	0.856002	0.863677	1.04511
-	chr6	30678338	CCGGGCGACCCTATGCGGGG	GCCGGGCGACCCTATGCGGGG	control-gDNA sequences	-	-	-	0	1	0	0	30	0	0	0	3.86787	1.25247	5.82205	6.00696	0	0	5.15283	0
-	chr6	30679385	GACTCCGTATGTTGAGACTC	GACTCCGTATGTTGAGACTC	control-gDNA sequences	-	-	-	397	185	46	45	92	110	166	62	196.959	50.2891	103.598	84.2188	2.01565	0.914711	0.888049	1.97106
+	chr6	30679554	TTAGGGGGTATGGGCTCGTA	GTTAGGGGGTATGGGCTCGTA	control-gDNA sequences	-	-	-	0	0	0	0	0	0	0	0	2.64249	1.25247	5.82205	6.00696	0	0	0	0
-	chr6	30679815	TAGTCAGGAGCGATATATCC	GTAGTCAGGAGCGATATATCC	control-gDNA sequences	-	-	-	0	0	0	0	0	0	0	0	2.64249	1.25247	5.82205	6.00696	0	0	0	0
-	chr6	30680194	CCTAACCAACTGACCCGGAA	GCCTAACCAACTGACCCGGAA	control-gDNA sequences	-	-	-	0	0	0	0	0	0	0	0	2.64249	1.25247	5.82205	6.00696	0	0	0	0
-	chr6	30680745	ACCTACGGCTGCCAAGGTAT	GACCTACGGCTGCCAAGGTAT	control-gDNA sequences	-	-	-	20	51	102	138	140	30	2	105	60.299	132.082	34.3559	135.359	0.331681	0.772246	4.07499	0.0147756
-	chr6	30680949	ATCGTGTCCTAAGTTGAGGC	GATCGTGTCCTAAGTTGAGGC	control-gDNA sequences	-	-	-	33	97	13	32	122	415	46	95	105.979	37.1036	326.491	123.687	0.311383	0.35037	0.37367	0.371906
+	chr6	30681662	CCCACTTTAGACTCACGCTG	GCCCACTTTAGACTCACGCTG	control-gDNA sequences	-	-	-	54	24	0	0	45	96	33	58	30.991	1.25247	92.2546	79.3307	1.74244	0	0.487781	0.41598
-	chr6	30684655	TGCAGATTTATTGACGTTGG	GTGCAGATTTATTGACGTTGG	control-gDNA sequences	-	-	-	41	64	0	5	222	218	57	144	73.4161	7.21734	184.378	179.703	0.55846	0	1.20405	0.317191
-	chr6	30685372	TTGGACGTCCACGGTCCCAA	GTTGGACGTCCACGGTCCCAA	control-gDNA sequences	-	-	-	0	0	0	0	0	0	0	0	2.64249	1.25247	5.82205	6.00696	0	0	0	0
-	chr6	30689785	CCTAGAACCTCCACGCTTCAGTG	GCCTAGAACCTCCACGCTTCA	ineffective-gDNA	enhancer_2	-	-	42	67	0	0	66	57	0	94	76.3912	1.25247	58.9018	122.513	0.549801	0	1.12051	0
+	chr6	30689789	GAACCTCCACGCTTCAGTGCAGG	GAACCTCCACGCTTCAGTGC	regulatory-gDNA sequences	enhancer_2	-	-	1554	171	289	487	154	224	334	233	182.351	431.509	188.687	273.732	8.52201	0.669743	0.816168	1.22017
-	chr6	30689792	CCTCCACGCTTCAGTGCAGGACT	GCCTCCACGCTTCAGTGCAGG	ineffective-gDNA	enhancer_2	-	-	47	84	6	4	39	115	145	93	93.1067	6.03616	107.58	121.337	0.504797	0.99401	0.36252	1.19502
-	chr6	30689795	CCACGCTTCAGTGCAGGACTTTT	GCCACGCTTCAGTGCAGGACT	ineffective-gDNA	enhancer_2	-	-	35	104	62	156	100	162	253	201	113.007	146.84	143.577	241.188	0.309714	0.422229	0.69649	1.04897
+	chr6	30689891	ACCCAATACCACCCTCAGATAGG	GACCCAATACCACCCTCAGAT	regulatory-gDNA sequences	enhancer_2	-	-	32	37	0	0	115	71	0	83	45.5368	1.25247	71.2	109.508	0.702729	0	1.61517	0
+	chr6	30689892	CCCAATACCACCCTCAGATAGGG	GCCCAATACCACCCTCAGATA	regulatory-gDNA sequences	enhancer_2	-	-	0	0	0	0	0	0	0	0	2.64249	1.25247	5.82205	6.00696	0	0	0	0
-	chr6	30689893	CCAATACCACCCTCAGATAGGGC	GCCAATACCACCCTCAGATAG	ineffective-gDNA	enhancer_2	-	-	0	0	0	0	0	0	0	0	2.64249	1.25247	5.82205	6.00696	0	0	0	0
+	chr6	30689897	TACCACCCTCAGATAGGGCATGG	GTACCACCCTCAGATAGGGCA	regulatory-gDNA sequences	enhancer_2	-	-	0	0	0	0	0	0	0	0	2.64249	1.25247	5.82205	6.00696	0	0	0	0
-	chr6	30689899	CCACCCTCAGATAGGGCATGGCT	GCCACCCTCAGATAGGGCATG	ineffective-gDNA	enhancer_2	-	-	1066	226	304	534	162	768	514	642	238.989	465.525	620.449	709.897	4.46045	0.653026	0.261101	0.724049
-	chr6	30689902	CCCTCAGATAGGGCATGGCTTCT	GCCCTCAGATAGGGCATGGCT	ineffective-gDNA	enhancer_2	-	-	145	240	178	266	370	487	253	247	252.897	242.618	382.27	287.63	0.573357	0.733665	0.967903	0.879601
-	chr6	30689934	CCAAATGCCACAGCACTGCATGA	GCCAAATGCCACAGCACTGCA	ineffective-gDNA	enhancer_2	-	-	0	0	0	0	0	0	0	0	2.64249	1.25247	5.82205	6.00696	0	0	0	0
-	chr6	30689941	CCACAGCACTGCATGAGTTGAAA	GCCACAGCACTGCATGAGTTG	ineffective-gDNA	enhancer_2	-	-	3550	5248	5948	4573	8545	9899	8153	9587	6314.73	4537.36	7850.37	10295.6	0.562177	1.31089	1.08848	0.791888
+	chr6	30689996	TTTAGGAATTTCTTTTAGAAGGG	GTTTAGGAATTTCTTTTAGAA	regulatory-gDNA sequences	enhancer_2	-	-	0	0	0	0	0	0	0	0	2.64249	1.25247	5.82205	6.00696	0	0	0	0
+	chr6	30690703	TCCCTAGCAGCAACGAGCACAGG	GTCCCTAGCAGCAACGAGCAC	regulatory-gDNA sequences	CTCF_11	DHS_27	-	0	0	44	68	0	0	0	24	2.64249	72.1289	5.82205	36.8955	0	0.610019	0	0
-	chr6	30690705	CCTAGCAGCAACGAGCACAGGCA	GCCTAGCAGCAACGAGCACAG	ineffective-gDNA	CTCF_11	DHS_27	-	0	0	0	0	0	0	0	0	2.64249	1.25247	5.82205	6.00696	0	0	0	0
+	chr6	30690726	CAGTGCAAAAGCATCTGCTCAGG	GCAGTGCAAAAGCATCTGCTC	regulatory-gDNA sequences	CTCF_11	DHS_27	-	0	0	0	0	0	0	0	0	2.64249	1.25247	5.82205	6.00696	0	0	0	0
+	chr6	30690728	GTGCAAAAGCATCTGCTCAGGGG	GTGCAAAAGCATCTGCTCAG	regulatory-gDNA sequences	CTCF_11	DHS_27	-	2	24	0	0	0	41	0	0	30.991	1.25247	44.4738	6.00696	0.064535	0	0	0
+	chr6	30690786	GCTGATTACATCACCTTTCAAGG	GCTGATTACATCACCTTTCA	regulatory-gDNA sequences	CTCF_11	DHS_27	-	0	0	0	0	0	0	0	0	2.64249	1.25247	5.82205	6.00696	0	0	0	0
-	chr6	30690814	CCTCCCACTTGACCAAGTTTCTA	GCCTCCCACTTGACCAAGTTT	ineffective-gDNA	CTCF_11	DHS_27	-	11	25	0	0	0	75	67	116	32.1338	1.25247	74.6438	148.051	0.342319	0	0	0.452547
+	chr6	30690816	TCCCACTTGACCAAGTTTCTAGG	GTCCCACTTGACCAAGTTTCT	regulatory-gDNA sequences	CTCF_11	DHS_27	-	0	0	0	0	0	0	0	0	2.64249	1.25247	5.82205	6.00696	0	0	0	0
+	chr6	30690817	CCCACTTGACCAAGTTTCTAGGG	GCCCACTTGACCAAGTTTCTA	regulatory-gDNA sequences	CTCF_11	DHS_27	-	0	0	0	0	0	0	0	0	2.64249	1.25247	5.82205	6.00696	0	0	0	0
-	chr6	30690818	CCACTTGACCAAGTTTCTAGGGC	GCCACTTGACCAAGTTTCTAG	ineffective-gDNA	CTCF_11	DHS_27	-	0	0	0	0	0	0	0	0	2.64249	1.25247	5.82205	6.00696	0	0	0	0
+	chr6	30690820	ACTTGACCAAGTTTCTAGGGCGG	GACTTGACCAAGTTTCTAGGG	regulatory-gDNA sequences	CTCF_11	DHS_27	-	0	0	0	0	0	0	0	0	2.64249	1.25247	5.82205	6.00696	0	0	0	0
-	chr6	30690826	CCAAGTTTCTAGGGCGGCCCTAA	GCCAAGTTTCTAGGGCGGCCC	ineffective-gDNA	CTCF_11	DHS_27	-	1212	2237	1460	2651	3473	4021	3443	4532	2625.6	2592.14	3239.55	4930.24	0.461608	0.563242	1.07206	0.698344
+	chr6	30690833	TCTAGGGCGGCCCTAAGCTCAGG	GTCTAGGGCGGCCCTAAGCTC	regulatory-gDNA sequences	CTCF_11	DHS_27	-	0	0	0	0	0	0	0	0	2.64249	1.25247	5.82205	6.00696	0	0	0	0
+	chr6	30690837	GGGCGGCCCTAAGCTCAGGATGG	GGGCGGCCCTAAGCTCAGGA	regulatory-gDNA sequences	CTCF_11	DHS_27	-	0	0	0	0	0	0	0	0	2.64249	1.25247	5.82205	6.00696	0	0	0	0
-	chr6	30690843	CCCTAAGCTCAGGATGGCAAAAG	GCCCTAAGCTCAGGATGGCAA	ineffective-gDNA	CTCF_11	DHS_27	-	0	0	0	0	0	0	0	0	2.64249	1.25247	5.82205	6.00696	0	0	0	0
+	chr6	30690844	CCTAAGCTCAGGATGGCAAAAGG	GCCTAAGCTCAGGATGGCAAA	regulatory-gDNA sequences	CTCF_11	DHS_27	-	0	0	0	0	0	0	0	0	2.64249	1.25247	5.82205	6.00696	0	0	0	0
+	chr6	30691110	GGGAAGAACTGAATTTGCAACGG	GGGAAGAACTGAATTTGCAA	regulatory-gDNA sequences	CTCF_12	DHS_28	-	0	0	0	0	0	0	0	0	2.64249	1.25247	5.82205	6.00696	0	0	0	0
+	chr6	30691113	AAGAACTGAATTTGCAACGGAGG	GAAGAACTGAATTTGCAACGG	regulatory-gDNA sequences	CTCF_12	DHS_28	-	11	12	0	0	106	94	0	19	17.0678	1.25247	90.6094	30.5275	0.644488	0	1.16986	0
+	chr6	30691122	ATTTGCAACGGAGGTTCAACCGG	GATTTGCAACGGAGGTTCAAC	regulatory-gDNA sequences	CTCF_12	DHS_28	-	0	0	0	0	0	0	0	0	2.64249	1.25247	5.82205	6.00696	0	0	0	0
-	chr6	30691141	CCGGCTACCATCGACCACCCCCA	GCCGGCTACCATCGACCACCC	ineffective-gDNA	CTCF_12	DHS_28	-	393	631	444	762	1391	2188	2293	1713	614.446	636.62	1794.29	1933.44	0.639601	0.697434	0.775238	1.18597
-	chr6	30691148	CCATCGACCACCCCCATCCTCCC	GCCATCGACCACCCCCATCCT	ineffective-gDNA	CTCF_12	DHS_28	-	685	48	43	69	176	67	383	234	57.2017	73.0426	67.7258	274.731	11.9752	0.588698	2.59871	1.39409
-	chr6	30691155	CCACCCCCATCCTCCCTATAGAG	GCCACCCCCATCCTCCCTATA	ineffective-gDNA	CTCF_12	DHS_28	-	0	0	0	0	0	0	0	0	2.64249	1.25247	5.82205	6.00696	0	0	0	0
+	chr6	30691156	CACCCCCATCCTCCCTATAGAGG	GCACCCCCATCCTCCCTATAG	regulatory-gDNA sequences	CTCF_12	DHS_28	-	0	0	0	0	0	0	0	0	2.64249	1.25247	5.82205	6.00696	0	0	0	0
+	chr6	30691157	ACCCCCATCCTCCCTATAGAGGG	GACCCCCATCCTCCCTATAGA	regulatory-gDNA sequences	CTCF_12	DHS_28	-	0	0	0	0	0	0	0	0	2.64249	1.25247	5.82205	6.00696	0	0	0	0
-	chr6	30691158	CCCCCATCCTCCCTATAGAGGGA	GCCCCCATCCTCCCTATAGAG	ineffective-gDNA	CTCF_12	DHS_28	-	0	0	0	0	0	0	0	0	2.64249	1.25247	5.82205	6.00696	0	0	0	0
-	chr6	30691159	CCCCATCCTCCCTATAGAGGGAA	GCCCCATCCTCCCTATAGAGG	ineffective-gDNA	CTCF_12	DHS_28	-	0	0	0	0	0	0	0	0	2.64249	1.25247	5.82205	6.00696	0	0	0	0
+	chr6	30691162	CATCCTCCCTATAGAGGGAAAGG	GCATCCTCCCTATAGAGGGAA	regulatory-gDNA sequences	CTCF_12	DHS_28	-	0	0	0	0	0	0	0	0	2.64249	1.25247	5.82205	6.00696	0	0	0	0
+	chr6	30691163	ATCCTCCCTATAGAGGGAAAGGG	GATCCTCCCTATAGAGGGAAA	regulatory-gDNA sequences	CTCF_12	DHS_28	-	0	0	0	0	0	0	0	0	2.64249	1.25247	5.82205	6.00696	0	0	0	0
+	chr6	30691168	CCCTATAGAGGGAAAGGGGGAGG	GCCCTATAGAGGGAAAGGGGG	regulatory-gDNA sequences	CTCF_12	DHS_28	-	0	0	0	0	0	0	0	0	2.64249	1.25247	5.82205	6.00696	0	0	0	0
+	chr6	30691197	TTGGACCCCTCTCAACAAATAGG	GTTGGACCCCTCTCAACAAAT	regulatory-gDNA sequences	CTCF_12	DHS_28	-	0	0	0	0	0	0	0	0	2.64249	1.25247	5.82205	6.00696	0	0	0	0
+	chr6	30691198	TGGACCCCTCTCAACAAATAGGG	GTGGACCCCTCTCAACAAATA	regulatory-gDNA sequences	CTCF_12	DHS_28	-	0	0	0	0	0	0	0	0	2.64249	1.25247	5.82205	6.00696	0	0	0	0
-	chr6	30691203	CCCTCTCAACAAATAGGGTTGAG	GCCCTCTCAACAAATAGGGTT	ineffective-gDNA	CTCF_12	DHS_28	-	0	0	0	0	0	0	0	0	2.64249	1.25247	5.82205	6.00696	0	0	0	0
-	chr6	30691204	CCTCTCAACAAATAGGGTTGAGG	GCCTCTCAACAAATAGGGTTG	ineffective-gDNA	CTCF_12	DHS_28	-	11	54	153	302	0	237	299	26	63.3663	278.179	197.995	39.4333	0.173594	0.550005	0	7.58243
+	chr6	30691207	CTCAACAAATAGGGTTGAGGTGG	GCTCAACAAATAGGGTTGAGG	regulatory-gDNA sequences	CTCF_12	DHS_28	-	0	0	0	0	0	0	0	0	2.64249	1.25247	5.82205	6.00696	0	0	0	0
+	chr6	30691208	TCAACAAATAGGGTTGAGGTGGG	GTCAACAAATAGGGTTGAGGT	regulatory-gDNA sequences	CTCF_12	DHS_28	-	0	0	0	0	0	0	0	0	2.64249	1.25247	5.82205	6.00696	0	0	0	0
+	chr6	30691211	ACAAATAGGGTTGAGGTGGGAGG	GACAAATAGGGTTGAGGTGGG	regulatory-gDNA sequences	CTCF_12	DHS_28	-	51	129	128	211	208	391	158	433	138.564	192.626	308.629	471.016	0.368062	0.664501	0.673948	0.335445
+	chr6	30691256	ACACAACCTGCAACGCCGCTTGG	GACACAACCTGCAACGCCGCT	regulatory-gDNA sequences	CTCF_12	DHS_28	-	1019	355	196	270	560	707	605	651	359.331	246.527	567.699	720.469	2.83583	0.795044	0.986439	0.839731
-	chr6	30691262	CCTGCAACGCCGCTTGGAAGACA	GCCTGCAACGCCGCTTGGAAG	ineffective-gDNA	CTCF_12	DHS_28	-	0	0	0	0	0	0	0	0	2.64249	1.25247	5.82205	6.00696	0	0	0	0
+	chr6	30691267	AACGCCGCTTGGAAGACAAAAGG	GAACGCCGCTTGGAAGACAAA	regulatory-gDNA sequences	CTCF_12	DHS_28	-	0	0	0	0	0	0	0	0	2.64249	1.25247	5.82205	6.00696	0	0	0	0
+	chr6	30691751	GTACAGATTGCTTATTAATCTGG	GTACAGATTGCTTATTAATC	regulatory-gDNA sequences	DHS_29	-	-	0	0	0	0	0	0	0	0	2.64249	1.25247	5.82205	6.00696	0	0	0	0
+	chr6	30691763	TATTAATCTGGCAAATTGAAAGG	GTATTAATCTGGCAAATTGAA	regulatory-gDNA sequences	DHS_29	-	-	0	0	0	0	0	0	0	0	2.64249	1.25247	5.82205	6.00696	0	0	0	0
+	chr6	30691803	ACACAAAGAAGTGGTACTTCTGG	GACACAAAGAAGTGGTACTTC	regulatory-gDNA sequences	DHS_29	-	-	0	0	0	0	0	0	0	0	2.64249	1.25247	5.82205	6.00696	0	0	0	0
+	chr6	30691804	CACAAAGAAGTGGTACTTCTGGG	GCACAAAGAAGTGGTACTTCT	regulatory-gDNA sequences	DHS_29	-	-	0	17	0	0	0	0	0	25	22.9205	1.25247	5.82205	38.1651	0	0	0	0
-	chr6	30691827	CCACAAGATCCACCATCTCTTGT	GCCACAAGATCCACCATCTCT	ineffective-gDNA	DHS_29	-	-	0	0	0	0	0	0	0	0	2.64249	1.25247	5.82205	6.00696	0	0	0	0
-	chr6	30691836	CCACCATCTCTTGTATGTGAGCT	GCCACCATCTCTTGTATGTGA	ineffective-gDNA	DHS_29	-	-	0	0	0	0	0	0	0	0	2.64249	1.25247	5.82205	6.00696	0	0	0	0
-	chr6	30691865	CCCTTTTGAAGACTGCTGCTAAC	GCCCTTTTGAAGACTGCTGCT	ineffective-gDNA	DHS_29	-	-	0	0	0	0	0	0	0	0	2.64249	1.25247	5.82205	6.00696	0	0	0	0
-	chr6	30691866	CCTTTTGAAGACTGCTGCTAACC	GCCTTTTGAAGACTGCTGCTA	ineffective-gDNA	DHS_29	-	-	69	222	234	366	334	484	1321	374	234.965	336.285	379.867	410.853	0.293661	0.695839	0.879256	3.21526
+	chr6	30691875	GACTGCTGCTAACCAGAGGAAGG	GACTGCTGCTAACCAGAGGA	regulatory-gDNA sequences	DHS_29	-	-	0	0	0	0	0	0	0	0	2.64249	1.25247	5.82205	6.00696	0	0	0	0
-	chr6	30691906	CCTCCTTATATAAACACATATGG	GCCTCCTTATATAAACACATA	ineffective-gDNA	DHS_29	-	-	0	0	0	0	0	0	0	0	2.64249	1.25247	5.82205	6.00696	0	0	0	0
-	chr6	30691909	CCTTATATAAACACATATGGCTT	GCCTTATATAAACACATATGG	ineffective-gDNA	DHS_29	-	-	0	0	0	0	0	0	0	0	2.64249	1.25247	5.82205	6.00696	0	0	0	0
+	chr6	30691920	CACATATGGCTTTGGCAGTCTGG	GCACATATGGCTTTGGCAGTC	regulatory-gDNA sequences	DHS_29	-	-	5480	8626	8163	8424	12813	15928	14053	14436	10278.6	8269.24	12544.9	15434.3	0.533147	0.987152	1.02138	0.910505
+	chr6	30691931	TTGGCAGTCTGGAAATTGGCTGG	GTTGGCAGTCTGGAAATTGGC	regulatory-gDNA sequences	DHS_29	-	-	71	128	80	199	245	397	121	242	137.53	182.418	313.067	282.687	0.51625	0.438552	0.78258	0.428036
+	chr6	30691941	GGAAATTGGCTGGATTACCAAGG	GGAAATTGGCTGGATTACCA	regulatory-gDNA sequences	DHS_29	-	-	0	0	0	0	0	0	0	0	2.64249	1.25247	5.82205	6.00696	0	0	0	0
+	chr6	30691942	GAAATTGGCTGGATTACCAAGGG	GAAATTGGCTGGATTACCAA	regulatory-gDNA sequences	DHS_29	-	-	0	0	0	0	0	0	0	0	2.64249	1.25247	5.82205	6.00696	0	0	0	0
-	chr6	30691958	CCAAGGGTTAACCATCAAAATCC	GCCAAGGGTTAACCATCAAAA	ineffective-gDNA	DHS_29	-	-	0	0	0	0	0	0	0	0	2.64249	1.25247	5.82205	6.00696	0	0	0	0
+	chr6	30692003	CCCTCTCTTTGCCTGCAGCAAGG	GCCCTCTCTTTGCCTGCAGCA	regulatory-gDNA sequences	DHS_29	-	-	1243	1810	3094	2153	3830	3724	3686	3204	2089.73	2078.73	3005.62	3518.94	0.594815	1.48841	1.27428	1.04747
-	chr6	30692004	CCTCTCTTTGCCTGCAGCAAGGC	GCCTCTCTTTGCCTGCAGCAA	ineffective-gDNA	DHS_29	-	-	394	757	363	680	664	1073	644	833	754.969	571.163	887.234	936.623	0.521876	0.635546	0.748394	0.687576
+	chr6	30692025	GCAGGGAAGAGATAGGTGGTAGG	GCAGGGAAGAGATAGGTGGT	regulatory-gDNA sequences	DHS_29	-	-	0	0	0	0	0	0	0	0	2.64249	1.25247	5.82205	6.00696	0	0	0	0
+	chr6	30692027	AGGGAAGAGATAGGTGGTAGGGG	GAGGGAAGAGATAGGTGGTAG	regulatory-gDNA sequences	DHS_29	-	-	57	29	0	0	0	11	0	26	36.6818	1.25247	16.4545	39.4333	1.5539	0	0	0
+	chr6	30692057	ACAAGACTGTTTAGACCCACAGG	GACAAGACTGTTTAGACCCAC	regulatory-gDNA sequences	DHS_29	-	-	31	29	0	0	0	223	28	25	36.6818	1.25247	187.969	38.1651	0.845105	0	0	0.733655
+	chr6	30692243	TTTTGCGACGTCAGCACCTC	GTTTTGCGACGTCAGCACCTC	control-gDNA sequences	-	-	-	10	38	0	0	0	116	13	45	46.6199	1.25247	108.372	63.2828	0.214501	0	0	0.205427
-	chr6	30692856	AAAGCGGTTGCGATCAGGAT	GAAAGCGGTTGCGATCAGGAT	control-gDNA sequences	-	-	-	788	39	0	1	147	0	86	55	47.6981	2.4568	5.82205	75.6493	16.5206	0	25.2489	1.13683
-	chr6	30692861	GGCTTAAAGCGGTTGCGATC	GGCTTAAAGCGGTTGCGATC	control-gDNA sequences	-	-	-	331	358	65	145	702	869	811	566	362.015	137.829	708.492	621.272	0.914328	0.4716	0.990837	1.30539
-	chr6	30692993	AGCGGGCGGCCGCCATTCTG	GAGCGGGCGGCCGCCATTCTG	control-gDNA sequences	-	-	-	524	235	19	99	263	310	566	430	247.964	99.4752	250.006	467.847	2.11321	0.191002	1.05197	1.2098
-	chr6	30692993	CAGAATGGCGGCCGCCCGCT	GCAGAATGGCGGCCGCCCGCT	control-gDNA sequences	-	-	-	38	126	96	216	134	333	496	213	135.466	196.935	266.467	253.536	0.280513	0.48747	0.502877	1.95633
-	chr6	30692994	AGAATGGCGGCCGCCCGCTC	GAGAATGGCGGCCGCCCGCTC	control-gDNA sequences	-	-	-	0	0	0	0	25	0	45	24	2.64249	1.25247	5.82205	36.8955	0	0	4.29402	1.21966
-	chr6	30692994	GAGCGGGCGGCCGCCATTCT	GAGCGGGCGGCCGCCATTCT	control-gDNA sequences	-	-	-	50	63	0	0	129	100	108	99	72.4211	1.25247	95.5259	128.371	0.690407	0	1.35042	0.84131
+	chr6	30693013	CGGGTGGAGTCTTTTATACC	GCGGGTGGAGTCTTTTATACC	control-gDNA sequences	-	-	-	0	0	0	0	0	0	0	0	2.64249	1.25247	5.82205	6.00696	0	0	0	0
-	chr6	30693039	CCGCCCAACGCGCCCAAACGTGC	GCCGCCCAACGCGCCCAAACG	ineffective-gDNA	DHS_30	Promoter_4	-	525	36	23	66	81	30	0	41	44.4487	70.2935	34.3559	58.2996	11.8114	0.327199	2.35767	0
-	chr6	30693042	CCCAACGCGCCCAAACGTGCTAG	GCCCAACGCGCCCAAACGTGC	ineffective-gDNA	DHS_30	Promoter_4	-	42	51	49	117	462	131	282	55	60.299	114.692	120.104	75.6493	0.696529	0.42723	3.84667	3.72773
-	chr6	30693043	CCAACGCGCCCAAACGTGCTAGT	GCCAACGCGCCCAAACGTGCT	ineffective-gDNA	DHS_30	Promoter_4	-	131	221	59	153	299	306	400	289	233.955	144.383	247.152	328.525	0.559936	0.408635	1.20978	1.21756
-	chr6	30693051	CCCAAACGTGCTAGTGAAACGCC	GCCCAAACGTGCTAGTGAAAC	ineffective-gDNA	DHS_30	Promoter_4	-	0	0	0	0	0	0	0	0	2.64249	1.25247	5.82205	6.00696	0	0	0	0
-	chr6	30693052	CCAAACGTGCTAGTGAAACGCCC	GCCAAACGTGCTAGTGAAACG	ineffective-gDNA	DHS_30	Promoter_4	-	0	0	0	0	0	0	0	0	2.64249	1.25247	5.82205	6.00696	0	0	0	0
-	chr6	30693072	CCCTTGTCGCGAGACATTATACG	GCCCTTGTCGCGAGACATTAT	ineffective-gDNA	DHS_30	Promoter_4	-	0	0	0	0	0	0	0	0	2.64249	1.25247	5.82205	6.00696	0	0	0	0
-	chr6	30693073	CCTTGTCGCGAGACATTATACGC	GCCTTGTCGCGAGACATTATA	ineffective-gDNA	DHS_30	Promoter_4	-	0	0	0	0	0	0	0	0	2.64249	1.25247	5.82205	6.00696	0	0	0	0
+	chr6	30693077	GTCGCGAGACATTATACGCGAGG	GTCGCGAGACATTATACGCG	regulatory-gDNA sequences	DHS_30	Promoter_4	-	27	56	61	112	150	74	42	63	65.3961	110.501	73.7857	85.4372	0.412868	0.552031	2.03292	0.491589
+	chr6	30693091	TACGCGAGGCGTGAACTCATTGG	GTACGCGAGGCGTGAACTCAT	regulatory-gDNA sequences	DHS_30	Promoter_4	-	0	0	0	0	0	0	0	0	2.64249	1.25247	5.82205	6.00696	0	0	0	0
-	chr6	30693118	CCCAAATGACAACTCGCCAACTG	GCCCAAATGACAACTCGCCAA	ineffective-gDNA	DHS_30	Promoter_4	-	11	37	7	81	0	152	153	242	45.5368	83.8203	136.103	282.687	0.241563	0.0835119	0	0.541235
-	chr6	30693119	CCAAATGACAACTCGCCAACTGA	GCCAAATGACAACTCGCCAAC	ineffective-gDNA	DHS_30	Promoter_4	-	0	0	0	0	0	0	0	0	2.64249	1.25247	5.82205	6.00696	0	0	0	0
+	chr6	30693123	ATGACAACTCGCCAACTGATTGG	GATGACAACTCGCCAACTGAT	regulatory-gDNA sequences	DHS_30	Promoter_4	-	24	36	85	47	143	121	47	44	44.4487	52.2586	112.314	62.0388	0.539948	1.62653	1.27321	0.75759
-	chr6	30693134	CCAACTGATTGGCTACTCTCACT	GCCAACTGATTGGCTACTCTC	ineffective-gDNA	DHS_30	Promoter_4	-	28	65	0	0	48	42	69	117	74.4094	1.25247	45.3853	149.197	0.376296	0	1.05761	0.462475
-	chr6	30693160	CCTTTGCTCCGCCCCTTTCCCTG	GCCTTTGCTCCGCCCCTTTCC	ineffective-gDNA	DHS_30	Promoter_4	-	336	706	623	1235	704	960	1185	1397	695.042	1121.94	788.227	1595.53	0.483424	0.555287	0.893144	0.7427
+	chr6	30693161	CTTTGCTCCGCCCCTTTCCCTGG	GCTTTGCTCCGCCCCTTTCCC	regulatory-gDNA sequences	DHS_30	Promoter_4	-	563	724	473	879	825	1308	2203	1381	715.669	747.24	1090.34	1577.86	0.786677	0.632996	0.756647	1.39619
-	chr6	30693199	CCTTCCTGCCTCCCTGTCGCGTG	GCCTTCCTGCCTCCCTGTCGC	ineffective-gDNA	DHS_30	Promoter_4	-	2856	3008	1463	2463	3541	5122	4057	4782	3585.03	2398.78	4105.91	5195.83	0.796646	0.609893	0.862415	0.780819
-	chr6	30693203	CCTGCCTCCCTGTCGCGTGCGCG	GCCTGCCTCCCTGTCGCGTGC	ineffective-gDNA	DHS_30	Promoter_4	-	3086	4240	2743	4354	6656	10086	7697	10007	5096.8	4318.58	7996.49	10741	0.605478	0.635163	0.832365	0.716599
-	chr6	30693207	CCTCCCTGTCGCGTGCGCGTGAC	GCCTCCCTGTCGCGTGCGCGT	ineffective-gDNA	DHS_30	Promoter_4	-	922	1844	1303	2524	2127	3546	3991	3597	2132.51	2461.58	2865.38	3936.67	0.432353	0.529335	0.742311	1.0138
-	chr6	30693471	CCCCCATGCCTTCCCTTTCACGC	GCCCCCATGCCTTCCCTTTCA	ineffective-gDNA	DHS_31	Promoter_5	-	0	7	0	0	46	174	19	0	11.1279	1.25247	152.447	6.00696	0	0	0.301743	3.163
-	chr6	30693472	CCCCATGCCTTCCCTTTCACGCT	GCCCCATGCCTTCCCTTTCAC	ineffective-gDNA	DHS_31	Promoter_5	-	29	46	0	0	0	55	101	100	55.1187	1.25247	57.1159	129.539	0.526137	0	0	0.779688
-	chr6	30693473	CCCATGCCTTCCCTTTCACGCTT	GCCCATGCCTTCCCTTTCACG	ineffective-gDNA	DHS_31	Promoter_5	-	520	790	535	671	1554	1596	1582	1829	796.332	564.381	1326.73	2056.83	0.652994	0.947941	1.1713	0.769143
-	chr6	30693474	CCATGCCTTCCCTTTCACGCTTC	GCCATGCCTTCCCTTTCACGC	ineffective-gDNA	DHS_31	Promoter_5	-	642	816	453	831	1151	1042	1217	1455	829.537	698.811	860.107	1658.75	0.773926	0.648244	1.33821	0.733687
-	chr6	30693479	CCTTCCCTTTCACGCTTCCGTCC	GCCTTCCCTTTCACGCTTCCG	ineffective-gDNA	DHS_31	Promoter_5	-	4626	5658	3025	4583	8518	10125	10294	9573	6805.37	4547.33	8026.96	10280.8	0.679758	0.665225	1.06117	1.00128
-	chr6	30693483	CCCTTTCACGCTTCCGTCCTGAC	GCCCTTTCACGCTTCCGTCCT	ineffective-gDNA	DHS_31	Promoter_5	-	0	0	0	0	0	1	0	0	2.64249	1.25247	6.79725	6.00696	0	0	0	0
-	chr6	30693484	CCTTTCACGCTTCCGTCCTGACG	GCCTTTCACGCTTCCGTCCTG	ineffective-gDNA	DHS_31	Promoter_5	-	1280	908	546	698	990	1538	1910	1681	946.931	584.928	1280.68	1899.4	1.35173	0.933448	0.773028	1.00558
+	chr6	30693493	CTTCCGTCCTGACGCAAACGTGG	GCTTCCGTCCTGACGCAAACG	regulatory-gDNA sequences	DHS_31	Promoter_5	-	15	11	0	0	0	0	200	36	15.8872	1.25247	5.82205	52.0428	0.944156	0	0	3.84299
+	chr6	30693494	TTCCGTCCTGACGCAAACGTGGG	GTTCCGTCCTGACGCAAACGT	regulatory-gDNA sequences	DHS_31	Promoter_5	-	0	0	0	0	0	0	0	0	2.64249	1.25247	5.82205	6.00696	0	0	0	0
+	chr6	30693495	TCCGTCCTGACGCAAACGTGGGG	GTCCGTCCTGACGCAAACGTG	regulatory-gDNA sequences	DHS_31	Promoter_5	-	0	0	0	0	0	0	0	0	2.64249	1.25247	5.82205	6.00696	0	0	0	0
-	chr6	30693496	CCGTCCTGACGCAAACGTGGGGC	GCCGTCCTGACGCAAACGTGG	ineffective-gDNA	DHS_31	Promoter_5	-	0	0	0	0	0	0	0	0	2.64249	1.25247	5.82205	6.00696	0	0	0	0
-	chr6	30693500	CCTGACGCAAACGTGGGGCCGCC	GCCTGACGCAAACGTGGGGCC	ineffective-gDNA	DHS_31	Promoter_5	-	3000	5504	9091	5941	6834	9243	9635	9124	6621.4	5887.74	7337.52	9804.61	0.453076	1.54406	0.931378	0.982701
+	chr6	30693514	GGGGCCGCCTTCCGCACTGCGGG	GGGGCCGCCTTCCGCACTGC	regulatory-gDNA sequences	DHS_31	Promoter_5	-	401	440	250	437	193	862	825	975	434.909	393.908	702.369	1106.49	0.922033	0.634667	0.274784	0.745601
-	chr6	30693518	CCGCCTTCCGCACTGCGGGCTTG	GCCGCCTTCCGCACTGCGGGC	ineffective-gDNA	DHS_31	Promoter_5	-	48	136	41	76	163	143	150	108	145.815	79.3692	129.301	138.835	0.329184	0.516573	1.26063	1.08042
-	chr6	30693521	CCTTCCGCACTGCGGGCTTGTCC	GCCTTCCGCACTGCGGGCTTG	ineffective-gDNA	DHS_31	Promoter_5	-	3144	5000	3684	3806	5836	7340	7780	7380	6016.63	3767.92	5847.37	7954.33	0.522551	0.977728	0.998056	0.978084
-	chr6	30693525	CCGCACTGCGGGCTTGTCCTTGG	GCCGCACTGCGGGCTTGTCCT	ineffective-gDNA	DHS_31	Promoter_5	-	21	49	0	1	24	12	184	106	58.2377	2.4568	17.411	136.519	0.360591	0	1.37844	1.3478
-	chr6	30693553	CCCTACTCAGTTTCCTGAAGCAT	GCCCTACTCAGTTTCCTGAAG	ineffective-gDNA	DHS_31	Promoter_5	-	0	0	0	0	0	0	0	0	2.64249	1.25247	5.82205	6.00696	0	0	0	0
-	chr6	30693554	CCTACTCAGTTTCCTGAAGCATG	GCCTACTCAGTTTCCTGAAGC	ineffective-gDNA	DHS_31	Promoter_5	-	29	89	37	50	77	99	289	172	98.0316	55.1854	94.7104	210.481	0.295823	0.670468	0.813005	1.37305
-	chr6	30693566	CCTGAAGCATGCGCAGTTGCCTT	GCCTGAAGCATGCGCAGTTGC	ineffective-gDNA	DHS_31	Promoter_5	-	3420	4428	3047	4903	4861	7019	6071	7859	5325.23	4865.67	5595.65	8462.63	0.642226	0.626225	0.868711	0.717389
+	chr6	30693587	TTTCCGTCAATTCCTGTCCTGGG	GTTTCCGTCAATTCCTGTCCT	regulatory-gDNA sequences	DHS_31	Promoter_5	-	77	119	38	100	209	190	121	326	128.268	100.331	164.142	364.136	0.600307	0.378747	1.27329	0.332294
-	chr6	30693590	CCGTCAATTCCTGTCCTGGGCGT	GCCGTCAATTCCTGTCCTGGG	ineffective-gDNA	DHS_31	Promoter_5	-	330	561	729	710	959	923	1721	1398	545.486	594.271	755.784	1596.63	0.604965	1.22671	1.26888	1.0779
-	chr6	30693599	CCTGTCCTGGGCGTACGTCAAGA	GCCTGTCCTGGGCGTACGTCA	ineffective-gDNA	DHS_31	Promoter_5	-	0	0	0	0	0	0	0	0	2.64249	1.25247	5.82205	6.00696	0	0	0	0
+	chr6	30693602	GTCCTGGGCGTACGTCAAGATGG	GTCCTGGGCGTACGTCAAGA	regulatory-gDNA sequences	DHS_31	Promoter_5	-	0	0	0	0	0	0	0	0	2.64249	1.25247	5.82205	6.00696	0	0	0	0
-	chr6	30693604	CCTGGGCGTACGTCAAGATGGCG	GCCTGGGCGTACGTCAAGATG	ineffective-gDNA	DHS_31	Promoter_5	-	95	137	41	72	475	563	287	426	146.854	75.7685	445.143	463.643	0.646903	0.541122	1.06707	0.619011
+	chr6	30693605	CTGGGCGTACGTCAAGATGGCGG	GCTGGGCGTACGTCAAGATGG	regulatory-gDNA sequences	DHS_31	Promoter_5	-	4	14	16	33	83	24	180	95	19.4187	38.1429	28.7632	123.687	0.205987	0.419475	2.88563	1.45528
-	chr6	30693746	GTGGAGCGACAACCTCGAGA	GTGGAGCGACAACCTCGAGA	control-gDNA sequences	-	-	-	0	0	0	0	0	0	0	0	2.64249	1.25247	5.82205	6.00696	0	0	0	0
-	chr6	30693849	TCGGGATTAGAAAATGCGCG	GTCGGGATTAGAAAATGCGCG	control-gDNA sequences	-	-	-	45	67	30	49	121	182	243	223	76.3912	54.2133	158.311	263.689	0.589073	0.553369	0.764318	0.921538
-	chr6	30693850	CTCGGGATTAGAAAATGCGC	GCTCGGGATTAGAAAATGCGC	control-gDNA sequences	-	-	-	7	17	16	56	42	49	41	50	22.9205	60.9455	51.7286	69.484	0.305403	0.26253	0.81193	0.590064
+	chr6	30693866	CGAGCCGAGGACTAAACGCC	GCGAGCCGAGGACTAAACGCC	control-gDNA sequences	-	-	-	43	80	161	31	114	204	388	122	89.1789	36.0599	174.29	154.911	0.482177	4.46479	0.654082	2.50466
+	chr6	30693867	GAGCCGAGGACTAAACGCCA	GAGCCGAGGACTAAACGCCA	control-gDNA sequences	-	-	-	0	0	0	0	0	0	0	0	2.64249	1.25247	5.82205	6.00696	0	0	0	0
+	chr6	30693867	TGGCGTTTAGTCCTCGGCTC	GTGGCGTTTAGTCCTCGGCTC	control-gDNA sequences	-	-	-	0	0	0	0	0	0	0	0	2.64249	1.25247	5.82205	6.00696	0	0	0	0
-	chr6	30694064	GCTGGTTGTGGCGCTCGCTT	GCTGGTTGTGGCGCTCGCTT	control-gDNA sequences	-	-	-	54	169	51	93	421	488	426	453	180.26	94.3125	383.072	492.523	0.299567	0.540756	1.09901	0.864935
-	chr6	30696181	AAACGGACTGTAGGGCCTCC	GAAACGGACTGTAGGGCCTCC	control-gDNA sequences	-	-	-	1569	2420	1803	2239	3221	3897	3919	3687	2854.27	2167.67	3141.89	4032.33	0.549702	0.831769	1.02518	0.971895
-	chr6	30700819	ACAGGGGACAATGTAACGTC	GACAGGGGACAATGTAACGTC	control-gDNA sequences	-	-	-	13	38	16	29	36	116	133	38	46.6199	33.9591	108.372	54.5493	0.278851	0.471155	0.332188	2.43816
+	chr6	30702521	CGCTAGGGGGCAAGGTCTACAGG	GCGCTAGGGGGCAAGGTCTAC	regulatory-gDNA sequences	CTCF_13	DHS_32	Promoter_6	0	0	0	0	0	0	0	0	2.64249	1.25247	5.82205	6.00696	0	0	0	0
+	chr6	30702524	TAGGGGGCAAGGTCTACAGGCGG	GTAGGGGGCAAGGTCTACAGG	regulatory-gDNA sequences	CTCF_13	DHS_32	Promoter_6	0	0	0	0	0	0	0	0	2.64249	1.25247	5.82205	6.00696	0	0	0	0
+	chr6	30702525	AGGGGGCAAGGTCTACAGGCGGG	GAGGGGGCAAGGTCTACAGGC	regulatory-gDNA sequences	CTCF_13	DHS_32	Promoter_6	2	16	10	18	178	34	0	19	21.7564	22.0689	38.0549	30.5275	0.091927	0.453126	4.67745	0
+	chr6	30702526	GGGGGCAAGGTCTACAGGCGGGG	GGGGGCAAGGTCTACAGGCG	regulatory-gDNA sequences	CTCF_13	DHS_32	Promoter_6	60	174	79	127	114	183	98	139	185.486	123.01	159.042	174.117	0.323474	0.642227	0.716794	0.56284
+	chr6	30702533	AGGTCTACAGGCGGGGCTCCTGG	GAGGTCTACAGGCGGGGCTCC	regulatory-gDNA sequences	CTCF_13	DHS_32	Promoter_6	280	123	323	173	12	16	27	34	132.376	160.788	21.2205	49.5313	2.11519	2.00886	0.565491	0.54511
-	chr6	30702551	CCTGGAAATAAAGACTCCGAGAG	GCCTGGAAATAAAGACTCCGA	ineffective-gDNA	CTCF_13	DHS_32	Promoter_6	0	0	0	0	0	0	0	0	2.64249	1.25247	5.82205	6.00696	0	0	0	0
+	chr6	30702552	CTGGAAATAAAGACTCCGAGAGG	GCTGGAAATAAAGACTCCGAG	regulatory-gDNA sequences	CTCF_13	DHS_32	Promoter_6	0	0	0	0	0	42	0	11	2.64249	1.25247	45.3853	20.2665	0	0	0	0
+	chr6	30702555	GAAATAAAGACTCCGAGAGGCGG	GAAATAAAGACTCCGAGAGG	regulatory-gDNA sequences	CTCF_13	DHS_32	Promoter_6	0	0	0	0	0	0	0	0	2.64249	1.25247	5.82205	6.00696	0	0	0	0
+	chr6	30702560	AAAGACTCCGAGAGGCGGTGCGG	GAAAGACTCCGAGAGGCGGTG	regulatory-gDNA sequences	CTCF_13	DHS_32	Promoter_6	651	422	285	505	452	787	559	512	418.913	444.646	636.954	559.133	1.55402	0.64096	0.709628	0.999762
+	chr6	30702567	CCGAGAGGCGGTGCGGCGAGAGG	GCCGAGAGGCGGTGCGGCGAG	regulatory-gDNA sequences	CTCF_13	DHS_32	Promoter_6	0	0	0	0	0	0	0	0	2.64249	1.25247	5.82205	6.00696	0	0	0	0
+	chr6	30702570	AGAGGCGGTGCGGCGAGAGGAGG	GAGAGGCGGTGCGGCGAGAGG	regulatory-gDNA sequences	CTCF_13	DHS_32	Promoter_6	0	5	0	0	0	41	0	0	8.72483	1.25247	44.4738	6.00696	0	0	0	0
+	chr6	30702571	GAGGCGGTGCGGCGAGAGGAGGG	GAGGCGGTGCGGCGAGAGGA	regulatory-gDNA sequences	CTCF_13	DHS_32	Promoter_6	0	0	0	0	0	0	0	0	2.64249	1.25247	5.82205	6.00696	0	0	0	0
+	chr6	30702572	AGGCGGTGCGGCGAGAGGAGGGG	GAGGCGGTGCGGCGAGAGGAG	regulatory-gDNA sequences	CTCF_13	DHS_32	Promoter_6	0	0	0	0	0	0	0	0	2.64249	1.25247	5.82205	6.00696	0	0	0	0
+	chr6	30702591	GGGGCGGAAGTGACGTCGTGTGG	GGGGCGGAAGTGACGTCGTG	regulatory-gDNA sequences	CTCF_13	DHS_32	Promoter_6	4931	4591	6131	5761	6068	7635	7199	7290	5522.81	5711.64	6078.61	7858.81	0.892843	1.07342	0.998255	0.916042
+	chr6	30702592	GGGCGGAAGTGACGTCGTGTGGG	GGGCGGAAGTGACGTCGTGT	regulatory-gDNA sequences	CTCF_13	DHS_32	Promoter_6	8886	4606	8186	5186	5225	5730	9028	6453	5540.97	5145.91	4583.79	6970.37	1.60369	1.59078	1.13989	1.2952
+	chr6	30702593	GGCGGAAGTGACGTCGTGTGGGG	GGCGGAAGTGACGTCGTGTG	regulatory-gDNA sequences	CTCF_13	DHS_32	Promoter_6	7727	6197	5249	4839	7027	8710	12437	9400	7446.27	4802.12	6920.51	10097.3	1.0377	1.09306	1.01539	1.23171
+	chr6	30702596	GGAAGTGACGTCGTGTGGGGCGG	GGAAGTGACGTCGTGTGGGG	regulatory-gDNA sequences	CTCF_13	DHS_32	Promoter_6	3334	2528	3358	2851	2385	4002	4546	4094	2988.95	2797.23	3224.59	4464.85	1.11544	1.20048	0.73963	1.01818
+	chr6	30702597	GAAGTGACGTCGTGTGGGGCGGG	GAAGTGACGTCGTGTGGGGC	regulatory-gDNA sequences	CTCF_13	DHS_32	Promoter_6	1727	2280	1305	2256	3951	3939	6039	4340	2679.39	2185.24	3174.97	4726.24	0.64455	0.59719	1.24442	1.27776
+	chr6	30702615	GCGGGTCCGACCGCGCACAATGG	GCGGGTCCGACCGCGCACAA	regulatory-gDNA sequences	CTCF_13	DHS_32	Promoter_6	0	0	0	0	0	0	0	0	2.64249	1.25247	5.82205	6.00696	0	0	0	0
+	chr6	30702616	CGGGTCCGACCGCGCACAATGGG	GCGGGTCCGACCGCGCACAAT	regulatory-gDNA sequences	CTCF_13	DHS_32	Promoter_6	0	0	0	0	0	0	0	0	2.64249	1.25247	5.82205	6.00696	0	0	0	0
-	chr6	30702621	CCGACCGCGCACAATGGGCCATG	GCCGACCGCGCACAATGGGCC	ineffective-gDNA	CTCF_13	DHS_32	Promoter_6	935	1814	1018	2049	2622	3986	2572	3504	2094.76	1971.01	3211.99	3837.83	0.446352	0.516486	0.816317	0.670171
+	chr6	30702622	CGACCGCGCACAATGGGCCATGG	GCGACCGCGCACAATGGGCCA	regulatory-gDNA sequences	CTCF_13	DHS_32	Promoter_6	60	64	10	19	207	262	235	142	73.4161	23.1743	215.826	177.472	0.817259	0.431512	0.959106	1.32415
-	chr6	30702625	CCGCGCACAATGGGCCATGGAGT	GCCGCGCACAATGGGCCATGG	ineffective-gDNA	CTCF_13	DHS_32	Promoter_6	325	591	476	719	763	1308	979	1161	574.427	601.374	1090.34	1326.74	0.565782	0.79152	0.699784	0.737901
-	chr6	30702639	CCATGGAGTTCCCGTTCGATGTG	GCCATGGAGTTCCCGTTCGAT	ineffective-gDNA	CTCF_13	DHS_32	Promoter_6	1918	3072	5303	3518	3133	4868	4753	4609	3664.2	3476.68	3906.15	5012.04	0.523442	1.52531	0.802068	0.948316
+	chr6	30702640	CATGGAGTTCCCGTTCGATGTGG	GCATGGAGTTCCCGTTCGATG	regulatory-gDNA sequences	CTCF_13	DHS_32	Promoter_6	839	442	284	560	694	1133	1095	1107	436.689	484.068	939.589	1263.3	1.92128	0.586694	0.738621	0.866778
-	chr6	30702649	CCCGTTCGATGTGGACGCGCTGT	GCCCGTTCGATGTGGACGCGC	ineffective-gDNA	CTCF_13	DHS_32	Promoter_6	55	126	30	81	165	253	115	124	135.466	83.8203	209.415	157.188	0.406005	0.357908	0.787909	0.731607
-	chr6	30702650	CCGTTCGATGTGGACGCGCTGTT	GCCGTTCGATGTGGACGCGCT	ineffective-gDNA	CTCF_13	DHS_32	Promoter_6	301	652	599	718	763	1486	1133	1146	636.218	600.581	1238.67	1309.17	0.473108	0.997368	0.615983	0.865434
+	chr6	30702655	CGATGTGGACGCGCTGTTCCCGG	GCGATGTGGACGCGCTGTTCC	regulatory-gDNA sequences	CTCF_13	DHS_32	Promoter_6	129	532	433	648	999	987	982	1176	518.231	547.311	811.905	1344.26	0.248924	0.791141	1.23044	0.730514
+	chr6	30702660	TGGACGCGCTGTTCCCGGAGCGG	GTGGACGCGCTGTTCCCGGAG	regulatory-gDNA sequences	CTCF_13	DHS_32	Promoter_6	170	220	235	293	151	448	614	283	232.945	269.426	351.598	322.734	0.729786	0.872223	0.429468	1.9025
+	chr6	30702667	GCTGTTCCCGGAGCGGATCACGG	GCTGTTCCCGGAGCGGATCA	regulatory-gDNA sequences	CTCF_13	DHS_32	Promoter_6	0	0	0	0	0	0	0	0	2.64249	1.25247	5.82205	6.00696	0	0	0	0
-	chr6	30702673	CCCGGAGCGGATCACGGTGCTGG	GCCCGGAGCGGATCACGGTGC	ineffective-gDNA	CTCF_13	DHS_32	Promoter_6	60	119	84	150	79	296	234	153	128.268	141.926	240.025	189.687	0.467771	0.591857	0.329132	1.23361
-	chr6	30702674	CCGGAGCGGATCACGGTGCTGGA	GCCGGAGCGGATCACGGTGCT	ineffective-gDNA	CTCF_13	DHS_32	Promoter_6	221	385	414	827	253	768	704	561	386.074	694.983	620.449	615.487	0.57243	0.595698	0.407769	1.14381
+	chr6	30702687	CGGTGCTGGACCAGCACCTGAGG	GCGGTGCTGGACCAGCACCTG	regulatory-gDNA sequences	CTCF_13	DHS_32	Promoter_6	0	0	0	0	0	0	0	0	2.64249	1.25247	5.82205	6.00696	0	0	0	0
-	chr6	30709359	ACAGCGGTGATCCGATGCAA	GACAGCGGTGATCCGATGCAA	control-gDNA sequences	-	-	-	1	20	53	101	154	0	143	93	26.3954	101.185	5.82205	121.337	0.0378854	0.523793	26.4512	1.17853
+	chr6	30711774	ATGTCATTGAATGGGCGGCG	GATGTCATTGAATGGGCGGCG	control-gDNA sequences	-	-	-	4766	6780	8977	8378	12442	16092	13749	14211	8134.31	8225.91	12672.1	15196	0.585913	1.09131	0.981842	0.904778
+	chr6	30716337	GCAGTCGATCCCACGCCCGC	GCAGTCGATCCCACGCCCGC	control-gDNA sequences	-	-	-	198	183	157	370	675	757	384	576	194.876	339.701	610.908	632.861	1.01603	0.462172	1.10491	0.606769
-	chr6	30716349	CAGGCTTTACCAGCGGGCGT	GCAGGCTTTACCAGCGGGCGT	control-gDNA sequences	-	-	-	464	259	91	110	606	755	540	663	271.244	108.818	609.175	734.588	1.71064	0.836262	0.994789	0.735106
-	chr6	30718556	GCGGCGAGGGGCCCTGTTTA	GCGGCGAGGGGCCCTGTTTA	control-gDNA sequences	-	-	-	0	0	0	0	0	0	0	0	2.64249	1.25247	5.82205	6.00696	0	0	0	0
-	chr6	30718557	CGCGGCGAGGGGCCCTGTTT	GCGCGGCGAGGGGCCCTGTTT	control-gDNA sequences	-	-	-	2	24	95	16	89	0	144	17	30.991	19.8428	5.82205	27.9707	0.064535	4.78764	15.2867	5.14824
+	chr6	30718745	CAGCTCAACGTCGTCGCACC	GCAGCTCAACGTCGTCGCACC	control-gDNA sequences	-	-	-	33	49	0	15	87	59	99	62	58.2377	18.7219	60.6825	84.2188	0.566644	0	1.43369	1.17551
-	chr6	30718746	TGGTGCGACGACGTTGAGCT	GTGGTGCGACGACGTTGAGCT	control-gDNA sequences	-	-	-	538	338	280	414	629	622	853	927	344.069	375.881	494.966	1049.11	1.56364	0.744917	1.27079	0.813074
-	chr6	30718747	CTGGTGCGACGACGTTGAGC	GCTGGTGCGACGACGTTGAGC	control-gDNA sequences	-	-	-	208	469	225	412	1171	849	1150	970	460.812	374.287	691.006	1100.52	0.451377	0.601143	1.69463	1.04496
+	chr6	30718752	ACGTCGTCGCACCAGGTAAT	GACGTCGTCGCACCAGGTAAT	control-gDNA sequences	-	-	-	0	0	0	0	0	0	0	0	2.64249	1.25247	5.82205	6.00696	0	0	0	0
+	chr6	30719019	AACACCGAGATCCATCGAGT	GAACACCGAGATCCATCGAGT	control-gDNA sequences	-	-	-	14	5	0	0	34	47	38	0	8.72483	1.25247	49.9228	6.00696	1.60462	0	0.681052	6.326
+	chr6	30719021	CACCGAGATCCATCGAGTTG	GCACCGAGATCCATCGAGTTG	control-gDNA sequences	-	-	-	732	1327	1429	2222	1779	3075	2697	3063	1479.62	2150.1	2494.12	3369.05	0.49472	0.664622	0.713279	0.800523
+	chr6	30719022	ACCGAGATCCATCGAGTTGG	GACCGAGATCCATCGAGTTGG	control-gDNA sequences	-	-	-	2001	877	370	712	1514	1531	2925	1621	907.392	595.842	1275.06	1835.58	2.20522	0.62097	1.18739	1.5935
+	chr6	30719075	CGCTTAATACTTGCTGGGGA	GCGCTTAATACTTGCTGGGGA	control-gDNA sequences	-	-	-	33	72	4	26	281	242	258	117	81.3232	30.7737	201.568	149.197	0.405788	0.129981	1.39407	1.72925
-	chr6	30720094	ATATCGGGACCTAGCTACCA	GATATCGGGACCTAGCTACCA	control-gDNA sequences	-	-	-	0	0	0	0	0	0	0	0	2.64249	1.25247	5.82205	6.00696	0	0	0	0
-	chr6	30722205	CCATCTCCCCACCTACCAGGTCT	GCCATCTCCCCACCTACCAGG	ineffective-gDNA	DHS_33	-	-	0	8	0	0	47	110	0	1	12.3235	1.25247	103.598	7.31069	0	0	0.453677	0
-	chr6	30722211	CCCCACCTACCAGGTCTGCCAGT	GCCCCACCTACCAGGTCTGCC	ineffective-gDNA	DHS_33	-	-	1507	1781	2022	2317	3159	3612	3475	3165	2053.21	2248.23	2917.38	3477.48	0.733972	0.899372	1.08282	0.999286
-	chr6	30722212	CCCACCTACCAGGTCTGCCAGTG	GCCCACCTACCAGGTCTGCCA	ineffective-gDNA	DHS_33	-	-	167	327	70	163	590	909	635	935	334.135	152.575	743.515	1058.68	0.499798	0.458791	0.793528	0.599806
-	chr6	30722213	CCACCTACCAGGTCTGCCAGTGA	GCCACCTACCAGGTCTGCCAG	ineffective-gDNA	DHS_33	-	-	128	254	821	679	486	814	613	606	266.481	570.406	660.46	667.763	0.480335	1.43933	0.735851	0.91799
+	chr6	30722215	ACCTACCAGGTCTGCCAGTGAGG	GACCTACCAGGTCTGCCAGTG	regulatory-gDNA sequences	DHS_33	-	-	173	438	254	589	658	691	641	1116	433.129	504.715	553.933	1273.91	0.399419	0.503254	1.18787	0.503176
-	chr6	30722216	CCTACCAGGTCTGCCAGTGAGGA	GCCTACCAGGTCTGCCAGTGA	ineffective-gDNA	DHS_33	-	-	2318	3914	5117	3409	5840	6920	6925	7771	4699.28	3366.11	5517.99	8369.25	0.493267	1.52015	1.05836	0.827433
-	chr6	30722220	CCAGGTCTGCCAGTGAGGAGCAG	GCCAGGTCTGCCAGTGAGGAG	ineffective-gDNA	DHS_33	-	-	96	136	80	137	264	410	96	173	145.815	131.26	322.745	211.563	0.658368	0.609477	0.817984	0.453767
+	chr6	30722221	CAGGTCTGCCAGTGAGGAGCAGG	GCAGGTCTGCCAGTGAGGAGC	regulatory-gDNA sequences	DHS_33	-	-	8	28	7	4	0	0	116	71	35.5494	6.03616	5.82205	95.1329	0.225039	1.15968	0	1.21935
-	chr6	30722229	CCAGTGAGGAGCAGGCCTTGTCA	GCCAGTGAGGAGCAGGCCTTG	ineffective-gDNA	DHS_33	-	-	27	56	0	0	26	239	225	95	65.3961	1.25247	199.425	123.687	0.412868	0	0.130375	1.81911
+	chr6	30722233	TGAGGAGCAGGCCTTGTCACAGG	GTGAGGAGCAGGCCTTGTCAC	regulatory-gDNA sequences	DHS_33	-	-	101	96	185	147	336	456	506	425	104.98	139.468	357.794	462.596	0.962085	1.32647	0.939088	1.09383
+	chr6	30722243	GCCTTGTCACAGGATGGGTCTGG	GCCTTGTCACAGGATGGGTC	regulatory-gDNA sequences	DHS_33	-	-	1391	539	117	254	781	761	903	613	524.752	231.145	614.376	675.935	2.65077	0.506176	1.27121	1.33593
-	chr6	30722244	CCTTGTCACAGGATGGGTCTGGG	GCCTTGTCACAGGATGGGTCT	ineffective-gDNA	DHS_33	-	-	114	176	42	59	352	277	254	151	187.575	63.7814	226.502	187.476	0.607757	0.658499	1.55407	1.35484
+	chr6	30722245	CTTGTCACAGGATGGGTCTGGGG	GCTTGTCACAGGATGGGTCTG	regulatory-gDNA sequences	DHS_33	-	-	282	686	99	209	961	1196	1408	1403	672.745	190.912	994.261	1602.13	0.419178	0.518564	0.966547	0.87883
-	chr6	30722274	CCATGCACACAGCTCCTCCACAG	GCCATGCACACAGCTCCTCCA	ineffective-gDNA	DHS_33	-	-	167	393	150	249	532	1181	712	798	393.179	226.471	981.278	894.806	0.424742	0.662336	0.54215	0.795703
+	chr6	30722275	CATGCACACAGCTCCTCCACAGG	GCATGCACACAGCTCCTCCAC	regulatory-gDNA sequences	DHS_33	-	-	108	313	50	104	632	659	701	664	321.413	103.74	526.501	735.765	0.336016	0.481974	1.20038	0.952749
+	chr6	30722281	CACAGCTCCTCCACAGGCCCCGG	GCACAGCTCCTCCACAGGCCC	regulatory-gDNA sequences	DHS_33	-	-	780	341	113	126	1366	885	724	644	346.769	122.181	722.494	712.245	2.24933	0.924856	1.89067	1.0165
+	chr6	30722301	CGGCCCCGCCAGCCCAGTCCTGG	GCGGCCCCGCCAGCCCAGTCC	regulatory-gDNA sequences	DHS_33	-	-	79	135	77	130	427	206	280	204	144.777	125.491	175.735	244.293	0.545666	0.613592	2.4298	1.14616
-	chr6	30722304	CCCCGCCAGCCCAGTCCTGGACA	GCCCCGCCAGCCCAGTCCTGG	ineffective-gDNA	DHS_33	-	-	606	329	220	355	512	469	651	836	335.945	326.771	367.965	940.211	1.80387	0.673254	1.39144	0.692398
+	chr6	30722308	GCCAGCCCAGTCCTGGACAGTGG	GCCAGCCCAGTCCTGGACAG	regulatory-gDNA sequences	DHS_33	-	-	0	0	0	0	0	0	0	0	2.64249	1.25247	5.82205	6.00696	0	0	0	0
+	chr6	30722331	GTGGGGACATACTCAACGCCAGG	GTGGGGACATACTCAACGCC	regulatory-gDNA sequences	DHS_33	-	-	10	42	5	18	134	178	65	98	50.9045	22.0689	155.384	127.202	0.196446	0.226563	0.862382	0.510998
-	chr6	30722349	CCAGGTTCATTCGAAACCTGCAG	GCCAGGTTCATTCGAAACCTG	ineffective-gDNA	DHS_33	-	-	0	0	0	0	0	0	0	0	2.64249	1.25247	5.82205	6.00696	0	0	0	0
+	chr6	30722350	CAGGTTCATTCGAAACCTGCAGG	GCAGGTTCATTCGAAACCTGC	regulatory-gDNA sequences	DHS_33	-	-	0	0	0	0	0	0	0	0	2.64249	1.25247	5.82205	6.00696	0	0	0	0
-	chr6	30722365	CCTGCAGGAACGTCGCAGCACCA	GCCTGCAGGAACGTCGCAGCA	ineffective-gDNA	DHS_33	-	-	8	24	18	65	140	0	153	0	30.991	69.3718	5.82205	6.00696	0.25814	0.259471	24.0465	25.4705
+	chr6	30722367	TGCAGGAACGTCGCAGCACCAGG	GTGCAGGAACGTCGCAGCACC	regulatory-gDNA sequences	DHS_33	-	-	1470	107	97	123	375	148	414	394	116.039	119.692	133.089	430.796	12.6681	0.810413	2.81766	0.961011
+	chr6	30722373	AACGTCGCAGCACCAGGCCT	GAACGTCGCAGCACCAGGCCT	control-gDNA sequences	-	-	-	37	119	153	437	320	278	204	308	128.268	393.908	227.213	346.816	0.288459	0.388416	1.40837	0.588208
+	chr6	30722693	AATACAGCGCTTGGGGGGGC	GAATACAGCGCTTGGGGGGGC	control-gDNA sequences	-	-	-	3117	4031	2727	4718	8686	8984	9450	8676	4842.15	4681.82	7134.92	9329.41	0.643722	0.582466	1.21739	1.01293
+	chr6	30722694	ATACAGCGCTTGGGGGGGCG	GATACAGCGCTTGGGGGGGCG	control-gDNA sequences	-	-	-	14229	14965	11446	16590	23209	31845	30772	27654	17281.3	15526.7	24797.8	29420	0.823377	0.737184	0.93593	1.04595
+	chr6	30722695	TACAGCGCTTGGGGGGGCGG	GTACAGCGCTTGGGGGGGCGG	control-gDNA sequences	-	-	-	1911	1688	1126	1877	2968	4161	4073	3745	1936.02	1792.49	3349.78	4093.97	0.987077	0.628178	0.886027	0.994878
+	chr6	30722742	TCAGGCAGTCTCCGAGCCCGCGG	GTCAGGCAGTCTCCGAGCCCG	regulatory-gDNA sequences	DHS_34	Promoter_7	-	600	1023	1015	1577	1292	2375	2159	2056	1093.46	1479.98	1941.9	2298.28	0.548719	0.685822	0.665328	0.939399
+	chr6	30722743	CAGGCAGTCTCCGAGCCCGCGGG	GCAGGCAGTCTCCGAGCCCGC	regulatory-gDNA sequences	DHS_34	Promoter_7	-	427	485	222	276	927	1420	1125	978	475.214	252.477	1184.42	1110.07	0.898542	0.879287	0.78266	1.01345
+	chr6	30722749	GTCTCCGAGCCCGCGGGCGCAGG	GTCTCCGAGCCCGCGGGCGC	regulatory-gDNA sequences	DHS_34	Promoter_7	-	0	27	49	77	47	18	63	28	34.4129	80.2637	23.1156	41.9656	0	0.610488	2.03326	1.50123
-	chr6	30722758	CCCGCGGGCGCAGGCGCGCTTAC	GCCCGCGGGCGCAGGCGCGCT	ineffective-gDNA	DHS_34	Promoter_7	-	0	0	0	0	0	0	0	0	2.64249	1.25247	5.82205	6.00696	0	0	0	0
-	chr6	30722759	CCGCGGGCGCAGGCGCGCTTACA	GCCGCGGGCGCAGGCGCGCTT	ineffective-gDNA	DHS_34	Promoter_7	-	0	0	0	0	0	0	0	0	2.64249	1.25247	5.82205	6.00696	0	0	0	0
-	chr6	30722783	CCGACAGAGCGCTTCAGCCGCTT	GCCGACAGAGCGCTTCAGCCG	ineffective-gDNA	DHS_34	Promoter_7	-	286	634	311	622	584	1430	1014	1050	617.522	528.379	1192.7	1195.83	0.463141	0.588593	0.489644	0.847946
-	chr6	30722800	CCGCTTCCCTCGAGCCTGCAGTG	GCCGCTTCCCTCGAGCCTGCA	ineffective-gDNA	DHS_34	Promoter_7	-	5770	4957	3582	4948	6670	9503	7711	8293	5964.85	4910.31	7540.83	8923.1	0.967334	0.729486	0.884518	0.864161
-	chr6	30722806	CCCTCGAGCCTGCAGTGCGCAAG	GCCCTCGAGCCTGCAGTGCGC	ineffective-gDNA	DHS_34	Promoter_7	-	12270	15951	11634	18676	23173	34298	33615	31555	18325.7	17254.2	26671.2	33546.4	0.669552	0.674271	0.868841	1.00205
-	chr6	30722807	CCTCGAGCCTGCAGTGCGCAAGC	GCCTCGAGCCTGCAGTGCGCA	ineffective-gDNA	DHS_34	Promoter_7	-	1960	3185	2092	3376	4471	6784	5180	5204	3803.82	3332.6	5411.3	5644.09	0.515271	0.627737	0.826234	0.917774
+	chr6	30722812	AGCCTGCAGTGCGCAAGCGCGGG	GAGCCTGCAGTGCGCAAGCGC	regulatory-gDNA sequences	DHS_34	Promoter_7	-	0	8	18	26	108	94	0	29	12.3235	30.7737	90.6094	43.2298	0	0.584915	1.19193	0
-	chr6	30722868	CCCTACCCCCCCGCCCCGGCCTC	GCCCTACCCCCCCGCCCCGGC	ineffective-gDNA	DHS_34	Promoter_7	-	46	81	34	63	242	635	554	311	90.1603	67.52	506.022	349.701	0.510202	0.503555	0.47824	1.58421
+	chr6	30722895	CCCCTTCACGAAGCCGGCTC	GCCCCTTCACGAAGCCGGCTC	control-gDNA sequences	-	-	-	196	52	1	2	0	48	41	19	61.3246	3.6564	50.8263	30.5275	3.19611	0.273493	0	1.34305
-	chr6	30723028	CCTGGTAGGCGCGCAGGCAA	GCCTGGTAGGCGCGCAGGCAA	control-gDNA sequences	-	-	-	0	0	0	0	0	0	0	0	2.64249	1.25247	5.82205	6.00696	0	0	0	0
-	chr6	30723034	GTCGAGCCTGGTAGGCGCGC	GTCGAGCCTGGTAGGCGCGC	control-gDNA sequences	-	-	-	9	3	10	78	118	31	45	20	6.30508	81.156	35.2828	31.8039	1.42742	0.123219	3.3444	1.41492
-	chr6	30723111	CGCCCCACGCACCGGCTTTG	GCGCCCCACGCACCGGCTTTG	control-gDNA sequences	-	-	-	3078	3947	2705	4453	4822	6737	6602	5998	4739.6	4417.57	5374.43	6487.29	0.649422	0.612328	0.897212	1.01768
+	chr6	30723199	CGTGGACAGGCTAGGGGTCG	GCGTGGACAGGCTAGGGGTCG	control-gDNA sequences	-	-	-	872	1520	919	1399	2722	4088	3825	2411	1723.92	1293.87	3292.31	2675.81	0.505825	0.710274	0.826776	1.42947
+	chr6	30723244	ACGTCCTTGCGCGACAGGCC	GACGTCCTTGCGCGACAGGCC	control-gDNA sequences	-	-	-	0	0	0	0	0	0	0	0	2.64249	1.25247	5.82205	6.00696	0	0	0	0
+	chr6	30723244	GGCCTGTCGCGCAAGGACGT	GGCCTGTCGCGCAAGGACGT	control-gDNA sequences	-	-	-	177	303	189	365	423	606	754	733	312.264	335.427	481.395	817.393	0.566829	0.56346	0.878695	0.922444
-	chr6	30723249	GACCGACGTCCTTGCGCGAC	GACCGACGTCCTTGCGCGAC	control-gDNA sequences	-	-	-	33	60	8	5	148	67	24	37	69.4241	7.21734	67.7258	53.2967	0.475339	1.10844	2.18528	0.450309
+	chr6	30723261	CGTCGGTCCTCCCAGGTTTG	GCGTCGGTCCTCCCAGGTTTG	control-gDNA sequences	-	-	-	4999	5443	3819	6577	6990	8305	10769	9127	6548.42	6506.15	6603.47	9807.79	0.76339	0.586983	1.05854	1.098
+	chr6	30723341	CCGCGGTTACCTGTGCCTAG	GCCGCGGTTACCTGTGCCTAG	control-gDNA sequences	-	-	-	210	187	106	172	357	385	426	643	199.039	159.965	304.208	711.071	1.05507	0.662645	1.17354	0.599097
-	chr6	30723468	CCGCTCTCCGAGTGCAAGAC	GCCGCTCTCCGAGTGCAAGAC	control-gDNA sequences	-	-	-	0	0	0	0	0	0	0	0	2.64249	1.25247	5.82205	6.00696	0	0	0	0
+	chr6	30723471	TTGCACTCGGAGAGCGGTCC	GTTGCACTCGGAGAGCGGTCC	control-gDNA sequences	-	-	-	13	36	79	234	76	57	102	34	44.4487	212.785	58.9018	49.5313	0.292472	0.371266	1.29028	2.05931
+	chr6	30723503	CGGCCAGTGTGCACCCGGTT	GCGGCCAGTGTGCACCCGGTT	control-gDNA sequences	-	-	-	3065	3308	2116	3107	6086	6959	6710	4805	3955.55	3058.82	5548.59	5220.26	0.774861	0.691769	1.09686	1.28538
-	chr6	30723590	TCGGGTACCTCGGTCCCCGA	GTCGGGTACCTCGGTCCCCGA	control-gDNA sequences	-	-	-	0	0	0	0	0	27	0	1	2.64249	1.25247	31.5663	7.31069	0	0	0	0
-	chr6	30723600	GGCGGACCGCTCGGGTACCT	GGCGGACCGCTCGGGTACCT	control-gDNA sequences	-	-	-	0	5	0	0	0	0	0	27	8.72483	1.25247	5.82205	40.7001	0	0	0	0
-	chr6	30723706	TACCGACGTTGAAACTGCAA	GTACCGACGTTGAAACTGCAA	control-gDNA sequences	-	-	-	0	0	0	0	0	0	0	0	2.64249	1.25247	5.82205	6.00696	0	0	0	0
+	chr6	30725238	TGATCCCCTGGATGCTCAAC	GTGATCCCCTGGATGCTCAAC	control-gDNA sequences	-	-	-	0	0	0	0	176	14	0	0	2.64249	1.25247	19.319	6.00696	0	0	9.11021	0
+	chr6	30725238	GTTGAGCATCCAGGGGATCA	GTTGAGCATCCAGGGGATCA	control-gDNA sequences	-	-	-	0	2	0	0	0	0	0	0	5.0887	1.25247	5.82205	6.00696	0	0	0	0
+	chr6	30725760	GGGTAATCCTTGGACGTACA	GGGTAATCCTTGGACGTACA	control-gDNA sequences	-	-	-	0	0	0	0	0	0	0	0	2.64249	1.25247	5.82205	6.00696	0	0	0	0
+	chr6	30730589	TCCGAGTCAACCGTGCCGTG	GTCCGAGTCAACCGTGCCGTG	control-gDNA sequences	-	-	-	41	101	48	113	208	202	175	96	109.987	111.341	172.844	124.86	0.372771	0.431107	1.2034	1.40157
-	chr6	30730932	GGACTATATCCGTGTACGCA	GGACTATATCCGTGTACGCA	control-gDNA sequences	-	-	-	0	0	0	0	0	0	0	0	2.64249	1.25247	5.82205	6.00696	0	0	0	0
-	chr6	30731020	TCAGATCGATGCGCCGAGCC	GTCAGATCGATGCGCCGAGCC	control-gDNA sequences	-	-	-	426	874	200	369	1189	1071	1594	1450	903.565	338.849	885.485	1653.35	0.471466	0.590234	1.34277	0.964103
+	chr6	30732061	AGGTTTCCCGCTACTACTAC	GAGGTTTCCCGCTACTACTAC	control-gDNA sequences	-	-	-	0	0	0	0	0	0	0	0	2.64249	1.25247	5.82205	6.00696	0	0	0	0
-	chr6	30732421	GGCCTATCAGCACGAGCTTG	GGCCTATCAGCACGAGCTTG	control-gDNA sequences	-	-	-	16	4	34	88	44	0	206	52	7.51709	89.97	5.82205	71.9546	2.12848	0.377904	7.55748	2.86292
-	chr6	30735221	CTGGGGCACGAAAGGTCAGT	GCTGGGGCACGAAAGGTCAGT	control-gDNA sequences	-	-	-	0	0	0	0	0	0	0	0	2.64249	1.25247	5.82205	6.00696	0	0	0	0
+	chr6	30735257	GATACGGGCCTGCATGTCAG	GATACGGGCCTGCATGTCAG	control-gDNA sequences	-	-	-	0	16	29	71	15	0	125	86	21.7564	74.8623	5.82205	113.071	0	0.387378	2.57641	1.1055
-	chr6	30738433	GTCCTCCGCTACATGACAGA	GTCCTCCGCTACATGACAGA	control-gDNA sequences	-	-	-	0	0	0	0	0	0	0	0	2.64249	1.25247	5.82205	6.00696	0	0	0	0
+	chr6	30740769	TGAGCTAAATAGCTCGCTAC	GTGAGCTAAATAGCTCGCTAC	control-gDNA sequences	-	-	-	0	0	0	0	0	0	0	0	2.64249	1.25247	5.82205	6.00696	0	0	0	0
-	chr6	30741315	GGCGAGTGCGGGATCTCGCC	GGCGAGTGCGGGATCTCGCC	control-gDNA sequences	-	-	-	0	0	0	0	0	0	0	0	2.64249	1.25247	5.82205	6.00696	0	0	0	0
-	chr6	30741326	CAAATATAAGCGGCGAGTGC	GCAAATATAAGCGGCGAGTGC	control-gDNA sequences	-	-	-	224	565	252	373	983	1256	827	1144	549.298	342.247	1045.94	1306.82	0.407793	0.736309	0.939826	0.632832
+	chr6	30746485	CCAACCTCAGATTTCACCCTGGG	GCCAACCTCAGATTTCACCCT	regulatory-gDNA sequences	CTCF_14	-	-	35	52	41	75	75	119	168	250	61.3246	78.4725	110.741	290.587	0.570734	0.522476	0.677253	0.57814
-	chr6	30746489	CCTCAGATTTCACCCTGGGATCT	GCCTCAGATTTCACCCTGGGA	ineffective-gDNA	CTCF_14	-	-	111	99	63	83	131	163	210	106	107.98	85.5866	144.32	136.519	1.02797	0.736097	0.907704	1.53825
+	chr6	30746492	CAGATTTCACCCTGGGATCTTGG	GCAGATTTCACCCTGGGATCT	regulatory-gDNA sequences	CTCF_14	-	-	1109	628	325	428	651	860	806	1002	611.381	386.917	700.621	1138.71	1.81393	0.839973	0.929176	0.707819
+	chr6	30746493	AGATTTCACCCTGGGATCTTGGG	GAGATTTCACCCTGGGATCTT	regulatory-gDNA sequences	CTCF_14	-	-	0	0	0	0	0	0	0	0	2.64249	1.25247	5.82205	6.00696	0	0	0	0
+	chr6	30746494	GATTTCACCCTGGGATCTTGGGG	GATTTCACCCTGGGATCTTG	regulatory-gDNA sequences	CTCF_14	-	-	0	0	0	0	0	0	0	0	2.64249	1.25247	5.82205	6.00696	0	0	0	0
-	chr6	30746501	CCCTGGGATCTTGGGGATTTACA	GCCCTGGGATCTTGGGGATTT	ineffective-gDNA	CTCF_14	-	-	25	75	72	161	222	251	341	319	84.2718	150.936	207.989	357.396	0.296659	0.477025	1.06736	0.954123
-	chr6	30746536	CCTATTCACCTTCTTGTCTGACC	GCCTATTCACCTTCTTGTCTG	ineffective-gDNA	CTCF_14	-	-	125	163	43	115	309	298	557	380	173.986	113.019	241.45	416.797	0.718451	0.380468	1.27977	1.33638
-	chr6	30746544	CCTTCTTGTCTGACCGTTCCAGG	GCCTTCTTGTCTGACCGTTCC	ineffective-gDNA	CTCF_14	-	-	190	386	826	579	350	951	149	587	386.962	497.589	780.334	645.635	0.491004	1.66	0.448526	0.230781
-	chr6	30746557	CCGTTCCAGGACATTTCGAGTCC	GCCGTTCCAGGACATTTCGAG	ineffective-gDNA	CTCF_14	-	-	6	1	0	0	0	0	85	28	3.86787	1.25247	5.82205	41.9656	1.55124	0	0	2.02547
-	chr6	30746562	CCAGGACATTTCGAGTCCGATCC	GCCAGGACATTTCGAGTCCGA	ineffective-gDNA	CTCF_14	-	-	70	88	160	227	145	229	54	84	97.0446	206.554	192.271	110.697	0.721317	0.774616	0.754144	0.487819
-	chr6	30746578	CCGATCCTTGTCCCGCTGTCGAA	GCCGATCCTTGTCCCGCTGTC	ineffective-gDNA	CTCF_14	-	-	1384	1939	1749	2530	2660	2996	3482	3207	2251.96	2467.75	2431.82	3522.13	0.614575	0.708742	1.09383	0.988606
-	chr6	30746583	CCTTGTCCCGCTGTCGAACCCGC	GCCTTGTCCCGCTGTCGAACC	ineffective-gDNA	CTCF_14	-	-	15	15	33	50	56	174	23	28	20.5891	55.1854	152.447	41.9656	0.72854	0.597985	0.36734	0.548067
-	chr6	30746589	CCCGCTGTCGAACCCGCTCAGCA	GCCCGCTGTCGAACCCGCTCA	ineffective-gDNA	CTCF_14	-	-	2	84	37	36	147	108	37	273	93.1067	41.2349	101.995	313.053	0.0214807	0.897298	1.44124	0.118191
-	chr6	30746590	CCGCTGTCGAACCCGCTCAGCAA	GCCGCTGTCGAACCCGCTCAG	ineffective-gDNA	CTCF_14	-	-	0	0	0	0	0	0	0	0	2.64249	1.25247	5.82205	6.00696	0	0	0	0
+	chr6	30746593	CTGTCGAACCCGCTCAGCAAAGG	GCTGTCGAACCCGCTCAGCAA	regulatory-gDNA sequences	CTCF_14	-	-	4	2	0	0	0	0	0	0	5.0887	1.25247	5.82205	6.00696	0.786055	0	0	0
-	chr6	30746601	CCCGCTCAGCAAAGGCATCACGC	GCCCGCTCAGCAAAGGCATCA	ineffective-gDNA	CTCF_14	-	-	44	53	28	138	104	0	89	114	62.347	132.082	5.82205	145.754	0.705728	0.211989	17.8631	0.610616
-	chr6	30746602	CCGCTCAGCAAAGGCATCACGCT	GCCGCTCAGCAAAGGCATCAC	ineffective-gDNA	CTCF_14	-	-	0	6	0	0	0	141	0	0	9.92841	1.25247	127.778	6.00696	0	0	0	0
+	chr6	30746610	CAAAGGCATCACGCTCCTCCAGG	GCAAAGGCATCACGCTCCTCC	regulatory-gDNA sequences	CTCF_14	-	-	78	155	125	162	392	141	400	529	165.62	151.755	127.778	578.612	0.470958	0.823696	3.06781	0.691309
+	chr6	30746619	CACGCTCCTCCAGGTCCTGAAGG	GCACGCTCCTCCAGGTCCTGA	regulatory-gDNA sequences	CTCF_14	-	-	0	19	0	0	53	13	0	26	25.2399	1.25247	18.3658	39.4333	0	0	2.8858	0
-	chr6	30746628	CCAGGTCCTGAAGGCGTTCACGC	GCCAGGTCCTGAAGGCGTTCA	ineffective-gDNA	CTCF_14	-	-	0	0	0	0	55	0	1	0	2.64249	1.25247	5.82205	6.00696	0	0	9.44685	0.166474
-	chr6	30746634	CCTGAAGGCGTTCACGCTCTGTC	GCCTGAAGGCGTTCACGCTCT	ineffective-gDNA	CTCF_14	-	-	0	0	0	0	0	0	0	0	2.64249	1.25247	5.82205	6.00696	0	0	0	0
-	chr6	30746656	CCGTTCCCACTCATCTTCCGACT	GCCGTTCCCACTCATCTTCCG	ineffective-gDNA	CTCF_14	-	-	134	256	3946	508	9	278	310	185	268.392	446.82	227.213	224.41	0.49927	8.83129	0.0396104	1.3814
+	chr6	30746660	TCCCACTCATCTTCCGACTCTGG	GTCCCACTCATCTTCCGACTC	regulatory-gDNA sequences	CTCF_14	-	-	672	30	0	0	42	163	50	0	37.8083	1.25247	144.32	6.00696	17.7739	0	0.29102	8.32368
-	chr6	30746661	CCCACTCATCTTCCGACTCTGGC	GCCCACTCATCTTCCGACTCT	ineffective-gDNA	CTCF_14	-	-	173	108	17	29	220	229	0	221	117.052	33.9591	192.271	261.668	1.47797	0.500602	1.14422	0
-	chr6	30746662	CCACTCATCTTCCGACTCTGGCT	GCCACTCATCTTCCGACTCTG	ineffective-gDNA	CTCF_14	-	-	448	829	374	901	1657	2159	1417	1791	846.135	770.456	1771.39	2016.41	0.529467	0.485427	0.935422	0.702733
+	chr6	30746701	ACTCCCCCTGCAGCCCATCCAGG	GACTCCCCCTGCAGCCCATCC	regulatory-gDNA sequences	CTCF_14	-	-	345	566	2615	872	838	1612	1492	1480	550.253	739.88	1339.37	1685.57	0.626984	3.53436	0.625667	0.885163
+	chr6	30746703	TCCCCCTGCAGCCCATCCAGGGG	GTCCCCCTGCAGCCCATCCAG	regulatory-gDNA sequences	CTCF_14	-	-	12	52	73	115	167	85	0	0	61.3246	113.019	83.1248	6.00696	0.19568	0.64591	2.00903	0
-	chr6	30746706	CCCTGCAGCCCATCCAGGGGATT	GCCCTGCAGCCCATCCAGGGG	ineffective-gDNA	CTCF_14	-	-	0	0	0	0	0	0	0	0	2.64249	1.25247	5.82205	6.00696	0	0	0	0
-	chr6	30746707	CCTGCAGCCCATCCAGGGGATTA	GCCTGCAGCCCATCCAGGGGA	ineffective-gDNA	CTCF_14	-	-	2	1	32	38	0	0	59	23	3.86787	43.2751	5.82205	35.6247	0.51708	0.739455	0	1.65616
+	chr6	30746715	CCATCCAGGGGATTAAATAAGGG	GCCATCCAGGGGATTAAATAA	regulatory-gDNA sequences	CTCF_14	-	-	0	0	0	0	0	0	0	0	2.64249	1.25247	5.82205	6.00696	0	0	0	0
-	chr6	30746719	CCAGGGGATTAAATAAGGGCATA	GCCAGGGGATTAAATAAGGGC	ineffective-gDNA	CTCF_14	-	-	0	0	0	0	0	0	0	0	2.64249	1.25247	5.82205	6.00696	0	0	0	0
-	chr6	30746774	CCCTGCTTCTGACTTACCCTGTT	GCCCTGCTTCTGACTTACCCT	ineffective-gDNA	CTCF_14	-	-	5	10	4	18	0	54	45	0	14.703	22.0689	56.2211	6.00696	0.340067	0.181251	0	7.49131
-	chr6	30746775	CCTGCTTCTGACTTACCCTGTTT	GCCTGCTTCTGACTTACCCTG	ineffective-gDNA	CTCF_14	-	-	19	30	18	108	0	102	0	59	37.8083	107.13	97.1522	80.5549	0.502535	0.168021	0	0
+	chr6	30746834	CTTCCTCACGCTTCTTCCTGAGG	GCTTCCTCACGCTTCTTCCTG	regulatory-gDNA sequences	CTCF_14	-	-	8	6	0	0	8	8	0	65	9.92841	1.25247	13.5752	87.8697	0.805768	0	0.589312	0
-	chr6	30746850	CCTGAGGTGTTTCCGCTTTTTAC	GCCTGAGGTGTTTCCGCTTTT	ineffective-gDNA	CTCF_14	-	-	0	0	0	0	0	0	0	0	2.64249	1.25247	5.82205	6.00696	0	0	0	0
+	chr6	30746861	TCCGCTTTTTACGTTTCTTCTGG	GTCCGCTTTTTACGTTTCTTC	regulatory-gDNA sequences	CTCF_14	-	-	22	104	0	0	38	61	12	115	113.007	1.25247	62.4555	146.903	0.194677	0	0.608434	0.0816864
-	chr6	30746862	CCGCTTTTTACGTTTCTTCTGGA	GCCGCTTTTTACGTTTCTTCT	ineffective-gDNA	CTCF_14	-	-	0	0	0	0	0	0	0	0	2.64249	1.25247	5.82205	6.00696	0	0	0	0
-	chr6	30746893	CCAGCCCTACTCACAGTCTCCTC	GCCAGCCCTACTCACAGTCTC	ineffective-gDNA	CTCF_14	-	-	763	539	495	755	745	1284	779	739	524.752	630.721	1069.89	824.522	1.45402	0.784816	0.69633	0.94479
-	chr6	30746897	CCCTACTCACAGTCTCCTCACTG	GCCCTACTCACAGTCTCCTCA	ineffective-gDNA	CTCF_14	-	-	115	174	72	80	493	433	500	183	185.486	82.9343	340.1	222.286	0.619992	0.868157	1.44958	2.24936
+	chr6	30748456	TAGGCGCTGCACGAACTCCTCGG	GTAGGCGCTGCACGAACTCCT	regulatory-gDNA sequences	DHS_35	-	-	0	0	0	0	0	0	0	0	2.64249	1.25247	5.82205	6.00696	0	0	0	0
+	chr6	30748462	CTGCACGAACTCCTCGGCAGAGG	GCTGCACGAACTCCTCGGCAG	regulatory-gDNA sequences	DHS_35	-	-	40	101	84	189	111	376	109	233	109.987	174.035	297.606	273.732	0.363679	0.482662	0.372976	0.398199
-	chr6	30748473	CCTCGGCAGAGGTGCAGCGCTGT	GCCTCGGCAGAGGTGCAGCGC	ineffective-gDNA	DHS_35	-	-	0	2	0	9	0	66	0	0	5.0887	11.8852	66.8524	6.00696	0	0	0	0
+	chr6	30748477	GGCAGAGGTGCAGCGCTGTGCGG	GGCAGAGGTGCAGCGCTGTG	regulatory-gDNA sequences	DHS_35	-	-	20	52	9	18	85	102	31	37	61.3246	22.0689	97.1522	53.2967	0.326134	0.407814	0.874916	0.58165
+	chr6	30748494	GTGCGGTACCGATCAGAAACTGG	GTGCGGTACCGATCAGAAAC	regulatory-gDNA sequences	DHS_35	-	-	0	0	0	0	0	0	0	0	2.64249	1.25247	5.82205	6.00696	0	0	0	0
+	chr6	30748495	TGCGGTACCGATCAGAAACTGGG	GTGCGGTACCGATCAGAAACT	regulatory-gDNA sequences	DHS_35	-	-	0	0	0	0	0	0	0	0	2.64249	1.25247	5.82205	6.00696	0	0	0	0
-	chr6	30748502	CCGATCAGAAACTGGGCGACGTG	GCCGATCAGAAACTGGGCGAC	ineffective-gDNA	DHS_35	-	-	241	381	315	424	514	409	659	858	382.518	383.785	321.997	966.527	0.630036	0.820772	1.59629	0.681822
-	chr6	30748525	CCGCTCGCTCAGCCCCAACACCG	GCCGCTCGCTCAGCCCCAACA	ineffective-gDNA	DHS_35	-	-	51	64	93	76	91	325	34	97	73.4161	79.3692	260.73	126.032	0.69467	1.17174	0.34902	0.269773
-	chr6	30748537	CCCCAACACCGAGTGCAGCTCGT	GCCCCAACACCGAGTGCAGCT	ineffective-gDNA	DHS_35	-	-	298	207	64	146	284	181	223	237	219.704	138.649	157.58	277.721	1.35637	0.461599	1.80226	0.802964
-	chr6	30748538	CCCAACACCGAGTGCAGCTCGTC	GCCCAACACCGAGTGCAGCTC	ineffective-gDNA	DHS_35	-	-	0	0	0	0	0	0	0	0	2.64249	1.25247	5.82205	6.00696	0	0	0	0
-	chr6	30748545	CCGAGTGCAGCTCGTCCTGAACC	GCCGAGTGCAGCTCGTCCTGA	ineffective-gDNA	DHS_35	-	-	0	0	0	0	0	0	0	0	2.64249	1.25247	5.82205	6.00696	0	0	0	0
-	chr6	30748560	CCTGAACCCAGCGCTCCAGACCC	GCCTGAACCCAGCGCTCCAGA	ineffective-gDNA	DHS_35	-	-	3	26	24	60	126	0	70	127	33.2744	64.7205	5.82205	160.595	0.0901593	0.370825	21.6419	0.435879
-	chr6	30748566	CCCAGCGCTCCAGACCCGCCGGC	GCCCAGCGCTCCAGACCCGCC	ineffective-gDNA	DHS_35	-	-	4047	4472	3236	5048	5854	8242	7499	7130	5378.61	5009.4	6554.13	7689	0.752425	0.645985	0.893177	0.975289
-	chr6	30748567	CCAGCGCTCCAGACCCGCCGGCG	GCCAGCGCTCCAGACCCGCCG	ineffective-gDNA	DHS_35	-	-	77	268	154	159	324	795	2398	858	279.748	149.297	643.913	966.527	0.275248	1.0315	0.503174	2.48105
-	chr6	30748575	CCAGACCCGCCGGCGTCGCCATG	GCCAGACCCGCCGGCGTCGCC	ineffective-gDNA	DHS_35	-	-	1074	2032	1763	1694	3374	4546	3724	3890	2368.74	1602.03	3652.82	4248.07	0.453406	1.10048	0.923669	0.876634
+	chr6	30748576	CAGACCCGCCGGCGTCGCCATGG	GCAGACCCGCCGGCGTCGCCA	regulatory-gDNA sequences	DHS_35	-	-	47	40	0	9	92	163	101	22	48.7715	11.8852	144.32	34.3524	0.963678	0	0.637472	2.94011
-	chr6	30748580	CCCGCCGGCGTCGCCATGGCGAC	GCCCGCCGGCGTCGCCATGGC	ineffective-gDNA	DHS_35	-	-	1310	1763	1419	2603	2245	3252	2615	3136	2030.54	2542.82	2633.66	3446.65	0.645148	0.558041	0.852425	0.758707
-	chr6	30748581	CCGCCGGCGTCGCCATGGCGACT	GCCGCCGGCGTCGCCATGGCG	ineffective-gDNA	DHS_35	-	-	77	191	7	52	126	130	135	315	203.194	57.1189	119.33	353.548	0.378948	0.122551	1.05589	0.381843
-	chr6	30748584	CCGGCGTCGCCATGGCGACTCAC	GCCGGCGTCGCCATGGCGACT	ineffective-gDNA	DHS_35	-	-	0	0	0	0	0	0	0	0	2.64249	1.25247	5.82205	6.00696	0	0	0	0
-	chr6	30748593	CCATGGCGACTCACGCTCCCTGC	GCCATGGCGACTCACGCTCCC	ineffective-gDNA	DHS_35	-	-	1520	3168	1742	3217	3323	5294	4194	5238	3782.83	3170.91	4241.14	5680.2	0.401815	0.549368	0.783516	0.738354
+	chr6	30748599	CGACTCACGCTCCCTGCTCCCGG	GCGACTCACGCTCCCTGCTCC	regulatory-gDNA sequences	DHS_35	-	-	855	1416	3486	1318	1656	2503	2923	2466	1592.36	1209.01	2042.92	2734.3	0.536938	2.88336	0.810606	1.06901
-	chr6	30748718	CCTCTAGGATCTTCCGACATCCC	GCCTCTAGGATCTTCCGACAT	ineffective-gDNA	CTCF_15	DHS_36	Promoter_8	0	0	0	0	0	0	0	0	2.64249	1.25247	5.82205	6.00696	0	0	0	0
-	chr6	30748731	CCGACATCCCAAAGCTGTCTTCC	GCCGACATCCCAAAGCTGTCT	ineffective-gDNA	CTCF_15	DHS_36	Promoter_8	69	152	109	137	485	438	528	311	162.485	131.26	343.916	349.701	0.424655	0.830413	1.41023	1.50986
-	chr6	30748738	CCCAAAGCTGTCTTCCCGTACCG	GCCCAAAGCTGTCTTCCCGTA	ineffective-gDNA	CTCF_15	DHS_36	Promoter_8	1466	167	37	73	63	105	68	153	178.169	76.6722	99.5804	189.687	8.22814	0.482574	0.632655	0.358485
-	chr6	30748739	CCAAAGCTGTCTTCCCGTACCGC	GCCAAAGCTGTCTTCCCGTAC	ineffective-gDNA	CTCF_15	DHS_36	Promoter_8	176	445	349	713	381	837	973	588	439.361	596.629	680.524	646.797	0.400582	0.584953	0.559863	1.50434
+	chr6	30748741	AAAGCTGTCTTCCCGTACCGCGG	GAAAGCTGTCTTCCCGTACCG	regulatory-gDNA sequences	CTCF_15	DHS_36	Promoter_8	105	155	108	201	285	773	103	473	165.62	184.108	624.789	514.76	0.633982	0.586614	0.456154	0.200093
+	chr6	30748748	TCTTCCCGTACCGCGGAGCCCGG	GTCTTCCCGTACCGCGGAGCC	regulatory-gDNA sequences	CTCF_15	DHS_36	Promoter_8	119	167	38	52	433	308	397	745	178.169	57.1189	248.579	831.654	0.667905	0.665279	1.7419	0.477362
+	chr6	30748752	CCCGTACCGCGGAGCCCGGAAGG	GCCCGTACCGCGGAGCCCGGA	regulatory-gDNA sequences	CTCF_15	DHS_36	Promoter_8	0	0	0	0	0	0	0	0	2.64249	1.25247	5.82205	6.00696	0	0	0	0
-	chr6	30748753	CCGTACCGCGGAGCCCGGAAGGG	GCCGTACCGCGGAGCCCGGAA	ineffective-gDNA	CTCF_15	DHS_36	Promoter_8	2	2	0	0	0	0	0	0	5.0887	1.25247	5.82205	6.00696	0.393027	0	0	0
+	chr6	30748754	CGTACCGCGGAGCCCGGAAGGGG	GCGTACCGCGGAGCCCGGAAG	regulatory-gDNA sequences	CTCF_15	DHS_36	Promoter_8	0	0	0	0	0	0	0	0	2.64249	1.25247	5.82205	6.00696	0	0	0	0
-	chr6	30748758	CCGCGGAGCCCGGAAGGGGCTGT	GCCGCGGAGCCCGGAAGGGGC	ineffective-gDNA	CTCF_15	DHS_36	Promoter_8	0	0	0	0	0	0	0	0	2.64249	1.25247	5.82205	6.00696	0	0	0	0
-	chr6	30748766	CCCGGAAGGGGCTGTACTTTTTC	GCCCGGAAGGGGCTGTACTTT	ineffective-gDNA	CTCF_15	DHS_36	Promoter_8	0	0	0	0	0	0	0	0	2.64249	1.25247	5.82205	6.00696	0	0	0	0
-	chr6	30748767	CCGGAAGGGGCTGTACTTTTTCG	GCCGGAAGGGGCTGTACTTTT	ineffective-gDNA	CTCF_15	DHS_36	Promoter_8	0	0	0	0	0	0	0	0	2.64249	1.25247	5.82205	6.00696	0	0	0	0
+	chr6	30748768	CGGAAGGGGCTGTACTTTTTCGG	GCGGAAGGGGCTGTACTTTTT	regulatory-gDNA sequences	CTCF_15	DHS_36	Promoter_8	0	0	0	0	0	0	0	0	2.64249	1.25247	5.82205	6.00696	0	0	0	0
+	chr6	30748784	TTTTCGGCCTCTAAGCACTACGG	GTTTTCGGCCTCTAAGCACTA	regulatory-gDNA sequences	CTCF_15	DHS_36	Promoter_8	0	0	0	0	0	0	0	0	2.64249	1.25247	5.82205	6.00696	0	0	0	0
+	chr6	30748787	TCGGCCTCTAAGCACTACGGTGG	GTCGGCCTCTAAGCACTACGG	regulatory-gDNA sequences	CTCF_15	DHS_36	Promoter_8	10	27	0	0	0	0	55	13	34.4129	1.25247	5.82205	22.8403	0.290589	0	0	2.40803
-	chr6	30748791	CCTCTAAGCACTACGGTGGCCGA	GCCTCTAAGCACTACGGTGGC	ineffective-gDNA	CTCF_15	DHS_36	Promoter_8	670	1120	618	1393	1508	1789	1270	1839	1216.86	1287.58	1479.2	2067.47	0.550599	0.479968	1.01947	0.614277
+	chr6	30748810	CCGAGCGAGTTCAAACCTCGCGG	GCCGAGCGAGTTCAAACCTCG	regulatory-gDNA sequences	CTCF_15	DHS_36	Promoter_8	0	0	0	0	0	0	0	0	2.64249	1.25247	5.82205	6.00696	0	0	0	0
-	chr6	30748825	CCTCGCGGAACCATACCTGAAAA	GCCTCGCGGAACCATACCTGA	ineffective-gDNA	CTCF_15	DHS_36	Promoter_8	0	0	0	0	0	0	0	0	2.64249	1.25247	5.82205	6.00696	0	0	0	0
+	chr6	30748830	CGGAACCATACCTGAAAACTCGG	GCGGAACCATACCTGAAAACT	regulatory-gDNA sequences	CTCF_15	DHS_36	Promoter_8	0	0	0	0	0	0	0	0	2.64249	1.25247	5.82205	6.00696	0	0	0	0
+	chr6	30748831	GGAACCATACCTGAAAACTCGGG	GGAACCATACCTGAAAACTC	regulatory-gDNA sequences	CTCF_15	DHS_36	Promoter_8	0	0	0	0	0	0	0	0	2.64249	1.25247	5.82205	6.00696	0	0	0	0
+	chr6	30748832	GAACCATACCTGAAAACTCGGGG	GAACCATACCTGAAAACTCG	regulatory-gDNA sequences	CTCF_15	DHS_36	Promoter_8	0	0	0	0	0	0	0	0	2.64249	1.25247	5.82205	6.00696	0	0	0	0
-	chr6	30748835	CCATACCTGAAAACTCGGGGTAA	GCCATACCTGAAAACTCGGGG	ineffective-gDNA	CTCF_15	DHS_36	Promoter_8	0	0	0	0	0	0	0	0	2.64249	1.25247	5.82205	6.00696	0	0	0	0
-	chr6	30748840	CCTGAAAACTCGGGGTAATTCTT	GCCTGAAAACTCGGGGTAATT	ineffective-gDNA	CTCF_15	DHS_36	Promoter_8	0	1	34	36	0	48	0	0	3.86787	41.2349	50.8263	6.00696	0	0.824544	0	0
-	chr6	30748884	CCAGTTTCTCTGACGCCCCCTGA	GCCAGTTTCTCTGACGCCCCC	ineffective-gDNA	CTCF_15	DHS_36	Promoter_8	1566	2907	1677	2899	4377	6102	5712	4704	3459.94	2846.35	4875.98	5112.97	0.452609	0.589175	0.897665	1.11716
+	chr6	30748887	GTTTCTCTGACGCCCCCTGATGG	GTTTCTCTGACGCCCCCTGA	regulatory-gDNA sequences	CTCF_15	DHS_36	Promoter_8	84	240	277	572	367	590	268	431	252.897	492.607	467.868	468.902	0.332152	0.562314	0.784409	0.571548
+	chr6	30752203	TTGATAAAGGCGGCACAATG	GTTGATAAAGGCGGCACAATG	control-gDNA sequences	-	-	-	51	67	0	0	27	65	0	11	76.3912	1.25247	65.977	20.2665	0.667616	0	0.409234	0
-	chr6	30754822	CCCGCCAAGCCCCTTCCGAGTGC	GCCCGCCAAGCCCCTTCCGAG	ineffective-gDNA	CTCF_16	DHS_37	enhancer_3	115	142	118	80	258	318	103	119	152.054	82.9343	255.721	151.487	0.756312	1.42281	1.00891	0.679928
-	chr6	30754823	CCGCCAAGCCCCTTCCGAGTGCC	GCCGCCAAGCCCCTTCCGAGT	ineffective-gDNA	CTCF_16	DHS_37	enhancer_3	90	271	93	246	169	408	295	414	282.569	223.695	321.25	451.17	0.318506	0.415745	0.52607	0.653856
-	chr6	30754831	CCCCTTCCGAGTGCCTACATGTA	GCCCCTTCCGAGTGCCTACAT	ineffective-gDNA	CTCF_16	DHS_37	enhancer_3	60	109	235	314	74	424	129	261	118.066	289.611	333.271	301.372	0.508189	0.811433	0.222042	0.428042
-	chr6	30754832	CCCTTCCGAGTGCCTACATGTAA	GCCCTTCCGAGTGCCTACATG	ineffective-gDNA	CTCF_16	DHS_37	enhancer_3	1575	2061	898	1534	1975	3513	4148	3464	2405.12	1435.06	2839.37	3795.31	0.654853	0.625756	0.695576	1.09293
-	chr6	30754833	CCTTCCGAGTGCCTACATGTAAT	GCCTTCCGAGTGCCTACATGT	ineffective-gDNA	CTCF_16	DHS_37	enhancer_3	2201	1206	749	1330	1747	2009	2209	2652	1326.12	1221.59	1652.96	2932.08	1.65973	0.613137	1.05689	0.75339
-	chr6	30754837	CCGAGTGCCTACATGTAATCCTC	GCCGAGTGCCTACATGTAATC	ineffective-gDNA	CTCF_16	DHS_37	enhancer_3	94	117	33	26	23	158	402	153	126.219	30.7737	140.597	189.687	0.744736	1.07234	0.163588	2.11928
-	chr6	30754863	CCTCTCTCCTGGACCACAGCGCC	GCCTCTCTCCTGGACCACAGC	ineffective-gDNA	CTCF_16	DHS_37	enhancer_3	0	0	0	0	0	26	0	0	2.64249	1.25247	30.6334	6.00696	0	0	0	0
-	chr6	30754870	CCTGGACCACAGCGCCCGCTCTG	GCCTGGACCACAGCGCCCGCT	ineffective-gDNA	CTCF_16	DHS_37	enhancer_3	304	710	279	447	584	1034	1537	2081	699.579	401.586	853.1	2324.87	0.434547	0.694745	0.684562	0.661113
-	chr6	30754876	CCACAGCGCCCGCTCTGACAGCA	GCCACAGCGCCCGCTCTGACA	ineffective-gDNA	CTCF_16	DHS_37	enhancer_3	409	28	0	0	30	41	0	74	35.5494	1.25247	44.4738	98.7454	11.5051	0	0.674554	0
+	chr6	30754878	ACAGCGCCCGCTCTGACAGCAGG	GACAGCGCCCGCTCTGACAGC	regulatory-gDNA sequences	CTCF_16	DHS_37	enhancer_3	80	167	293	529	258	99	225	265	178.169	461.944	94.7104	305.274	0.449012	0.634276	2.72409	0.737042
+	chr6	30754879	CAGCGCCCGCTCTGACAGCAGGG	GCAGCGCCCGCTCTGACAGCA	regulatory-gDNA sequences	CTCF_16	DHS_37	enhancer_3	29	74	8	26	823	205	116	284	83.2896	30.7737	175.012	323.7	0.348183	0.259962	4.70252	0.358357
+	chr6	30754880	AGCGCCCGCTCTGACAGCAGGGG	GAGCGCCCGCTCTGACAGCAG	regulatory-gDNA sequences	CTCF_16	DHS_37	enhancer_3	30	86	0	0	152	59	215	147	95.0739	1.25247	60.6825	183.041	0.315544	0	2.50484	1.1746
+	chr6	30754881	GCGCCCGCTCTGACAGCAGGGGG	GCGCCCGCTCTGACAGCAGG	regulatory-gDNA sequences	CTCF_16	DHS_37	enhancer_3	0	0	0	0	0	0	0	0	2.64249	1.25247	5.82205	6.00696	0	0	0	0
+	chr6	30754891	TGACAGCAGGGGGCGCCCTCGGG	GTGACAGCAGGGGGCGCCCTC	regulatory-gDNA sequences	CTCF_16	DHS_37	enhancer_3	1646	1930	1588	2671	2477	2756	3171	3019	2240.65	2612.67	2242.53	3322.27	0.734608	0.607806	1.10456	0.954467
-	chr6	30754906	CCCTCGGGCCGGCGGAGCCTCCG	GCCCTCGGGCCGGCGGAGCCT	ineffective-gDNA	CTCF_16	DHS_37	enhancer_3	0	0	0	0	0	0	0	0	2.64249	1.25247	5.82205	6.00696	0	0	0	0
-	chr6	30754907	CCTCGGGCCGGCGGAGCCTCCGC	GCCTCGGGCCGGCGGAGCCTC	ineffective-gDNA	CTCF_16	DHS_37	enhancer_3	0	0	0	0	0	0	0	0	2.64249	1.25247	5.82205	6.00696	0	0	0	0
-	chr6	30754914	CCGGCGGAGCCTCCGCTTACCCA	GCCGGCGGAGCCTCCGCTTAC	ineffective-gDNA	CTCF_16	DHS_37	enhancer_3	1511	81	78	139	55	258	69	41	90.1603	132.904	212.977	58.2996	16.759	0.586889	0.258243	1.18354
+	chr6	30754922	GCCTCCGCTTACCCACAATCAGG	GCCTCCGCTTACCCACAATC	regulatory-gDNA sequences	CTCF_16	DHS_37	enhancer_3	0	0	0	0	0	0	0	0	2.64249	1.25247	5.82205	6.00696	0	0	0	0
-	chr6	30754923	CCTCCGCTTACCCACAATCAGGG	GCCTCCGCTTACCCACAATCA	ineffective-gDNA	CTCF_16	DHS_37	enhancer_3	0	0	0	0	0	0	0	0	2.64249	1.25247	5.82205	6.00696	0	0	0	0
-	chr6	30754926	CCGCTTACCCACAATCAGGGCCT	GCCGCTTACCCACAATCAGGG	ineffective-gDNA	CTCF_16	DHS_37	enhancer_3	0	0	0	0	0	0	0	0	2.64249	1.25247	5.82205	6.00696	0	0	0	0
+	chr6	30754929	CTTACCCACAATCAGGGCCTTGG	GCTTACCCACAATCAGGGCCT	regulatory-gDNA sequences	CTCF_16	DHS_37	enhancer_3	0	0	0	0	0	0	0	0	2.64249	1.25247	5.82205	6.00696	0	0	0	0
-	chr6	30754933	CCCACAATCAGGGCCTTGGTGCG	GCCCACAATCAGGGCCTTGGT	ineffective-gDNA	CTCF_16	DHS_37	enhancer_3	82	167	258	407	98	525	300	298	178.169	370.283	413.393	337.196	0.460237	0.696764	0.237063	0.889691
-	chr6	30754934	CCACAATCAGGGCCTTGGTGCGC	GCCACAATCAGGGCCTTGGTG	ineffective-gDNA	CTCF_16	DHS_37	enhancer_3	1335	2517	1298	2260	3695	6348	4705	5497	2975.24	2189.37	5069.13	5955.28	0.448703	0.592865	0.728922	0.790056
-	chr6	30754946	CCTTGGTGCGCAGCCCGCCCTGG	GCCTTGGTGCGCAGCCCGCCC	ineffective-gDNA	CTCF_16	DHS_37	enhancer_3	75	146	63	158	212	0	0	103	156.222	148.478	5.82205	133.035	0.480086	0.424306	36.4133	0
+	chr6	30754954	CGCAGCCCGCCCTGGAGCTCTGG	GCGCAGCCCGCCCTGGAGCTC	regulatory-gDNA sequences	CTCF_16	DHS_37	enhancer_3	6	14	57	90	0	0	23	42	19.4187	91.7115	5.82205	59.5473	0.308981	0.621514	0	0.386248
+	chr6	30754995	TTCCTCATCCTCTTCGTCGTCGG	GTTCCTCATCCTCTTCGTCGT	regulatory-gDNA sequences	CTCF_16	DHS_37	enhancer_3	967	313	359	573	274	587	535	569	321.413	493.319	465.337	624.746	3.00859	0.727724	0.588821	0.856348
+	chr6	30754996	TCCTCATCCTCTTCGTCGTCGGG	GTCCTCATCCTCTTCGTCGTC	regulatory-gDNA sequences	CTCF_16	DHS_37	enhancer_3	53	34	62	81	164	151	121	0	42.257	83.8203	135.351	6.00696	1.25423	0.739677	1.21167	20.1433
-	chr6	30754997	CCTCATCCTCTTCGTCGTCGGGT	GCCTCATCCTCTTCGTCGTCG	ineffective-gDNA	CTCF_16	DHS_37	enhancer_3	301	684	601	1238	1390	2132	1469	1948	670.55	1125.09	1750.08	2183.41	0.448886	0.534179	0.794251	0.672801
+	chr6	30755000	CATCCTCTTCGTCGTCGGGTTGG	GCATCCTCTTCGTCGTCGGGT	regulatory-gDNA sequences	CTCF_16	DHS_37	enhancer_3	164	272	217	345	1083	936	952	1067	283.508	317.962	767.181	1216	0.578467	0.682471	1.41166	0.782895
+	chr6	30755001	ATCCTCTTCGTCGTCGGGTTGGG	GATCCTCTTCGTCGTCGGGTT	regulatory-gDNA sequences	CTCF_16	DHS_37	enhancer_3	5507	6645	5314	5652	11051	14473	15998	12624	7975.46	5604.78	11414.9	13514.8	0.690493	0.94812	0.968117	1.18374
-	chr6	30755003	CCTCTTCGTCGTCGGGTTGGGCT	GCCTCTTCGTCGTCGGGTTGG	ineffective-gDNA	CTCF_16	DHS_37	enhancer_3	18830	19153	13838	21927	30039	36869	38336	35396	21645.6	19856.8	28631.2	37610.8	0.869924	0.696889	1.04917	1.01928
+	chr6	30755008	TCGTCGTCGGGTTGGGCTGCTGG	GTCGTCGTCGGGTTGGGCTGC	regulatory-gDNA sequences	CTCF_16	DHS_37	enhancer_3	5404	5753	5595	5976	10304	11188	12396	11111	6918.66	5921.93	8856.88	11911.4	0.781076	0.944794	1.16339	1.04068
+	chr6	30755011	TCGTCGGGTTGGGCTGCTGGAGG	GTCGTCGGGTTGGGCTGCTGG	regulatory-gDNA sequences	CTCF_16	DHS_37	enhancer_3	2697	1306	724	890	2519	2475	3005	2753	1453	758.849	2020.82	3039.47	1.85616	0.954076	1.24652	0.98866
+	chr6	30755012	CGTCGGGTTGGGCTGCTGGAGGG	GCGTCGGGTTGGGCTGCTGGA	regulatory-gDNA sequences	CTCF_16	DHS_37	enhancer_3	27	57	46	77	117	100	82	75	66.4069	80.2637	95.5259	99.9467	0.406584	0.573111	1.2248	0.820437
+	chr6	30755018	GTTGGGCTGCTGGAGGGTTGGGG	GTTGGGCTGCTGGAGGGTTG	regulatory-gDNA sequences	CTCF_16	DHS_37	enhancer_3	786	1662	1075	1806	4232	4909	5112	4508	1903.23	1718.66	3938.4	4904.74	0.412983	0.625489	1.07455	1.04226
+	chr6	30755035	TTGGGGGCACTGGGGACCTCAGG	GTTGGGGGCACTGGGGACCTC	regulatory-gDNA sequences	CTCF_16	DHS_37	enhancer_3	110	107	183	259	333	418	219	178	116.039	235.88	328.746	216.945	0.947956	0.775818	1.01294	1.00947
+	chr6	30755041	GCACTGGGGACCTCAGGCTCCGG	GCACTGGGGACCTCAGGCTC	regulatory-gDNA sequences	CTCF_16	DHS_37	enhancer_3	2	1	0	0	0	0	0	0	3.86787	1.25247	5.82205	6.00696	0.51708	0	0	0
+	chr6	30755042	CACTGGGGACCTCAGGCTCCGGG	GCACTGGGGACCTCAGGCTCC	regulatory-gDNA sequences	CTCF_16	DHS_37	enhancer_3	904	376	443	564	910	629	556	1165	378.07	486.915	500.916	1331.41	2.39109	0.90981	1.81667	0.417601
-	chr6	30755060	CCGGGCCCAGCTCCTCCAGTACC	GCCGGGCCCAGCTCCTCCAGT	ineffective-gDNA	CTCF_16	DHS_37	enhancer_3	447	765	378	579	878	1634	1515	1526	764.803	497.589	1356.75	1734.52	0.584464	0.759662	0.647134	0.873442
-	chr6	30755065	CCCAGCTCCTCCAGTACCGAACT	GCCCAGCTCCTCCAGTACCGA	ineffective-gDNA	CTCF_16	DHS_37	enhancer_3	553	898	1082	1138	1532	1937	2482	1371	934.179	1020.05	1596.1	1566.77	0.591964	1.06073	0.959841	1.58415
-	chr6	30755066	CCAGCTCCTCCAGTACCGAACTC	GCCAGCTCCTCCAGTACCGAA	ineffective-gDNA	CTCF_16	DHS_37	enhancer_3	0	0	0	0	0	0	0	0	2.64249	1.25247	5.82205	6.00696	0	0	0	0
+	chr6	30755070	CTCCTCCAGTACCGAACTCTCGG	GCTCCTCCAGTACCGAACTCT	regulatory-gDNA sequences	CTCF_16	DHS_37	enhancer_3	0	0	0	0	0	0	0	0	2.64249	1.25247	5.82205	6.00696	0	0	0	0
-	chr6	30755072	CCTCCAGTACCGAACTCTCGGAG	GCCTCCAGTACCGAACTCTCG	ineffective-gDNA	CTCF_16	DHS_37	enhancer_3	226	463	296	702	757	880	956	638	455.434	588.027	718.117	705.203	0.49623	0.503378	1.05415	1.35564
+	chr6	30755073	CTCCAGTACCGAACTCTCGGAGG	GCTCCAGTACCGAACTCTCGG	regulatory-gDNA sequences	CTCF_16	DHS_37	enhancer_3	6	9	18	42	22	32	121	62	13.5151	47.3067	36.2083	84.2188	0.443947	0.380496	0.607596	1.43673
+	chr6	30755074	TCCAGTACCGAACTCTCGGAGGG	GTCCAGTACCGAACTCTCGGA	regulatory-gDNA sequences	CTCF_16	DHS_37	enhancer_3	0	0	0	0	0	0	0	0	2.64249	1.25247	5.82205	6.00696	0	0	0	0
+	chr6	30755075	CCAGTACCGAACTCTCGGAGGGG	GCCAGTACCGAACTCTCGGAG	regulatory-gDNA sequences	CTCF_16	DHS_37	enhancer_3	4	7	0	0	0	79	1	77	11.1279	1.25247	78.0578	102.345	0.359456	0	0	0.00977084
-	chr6	30755081	CCGAACTCTCGGAGGGGTATTGG	GCCGAACTCTCGGAGGGGTAT	ineffective-gDNA	CTCF_16	DHS_37	enhancer_3	2	27	0	1	0	124	39	0	34.4129	2.4568	114.664	6.00696	0.0581177	0	0	6.49247
+	chr6	30755088	CTCGGAGGGGTATTGGTACGTGG	GCTCGGAGGGGTATTGGTACG	regulatory-gDNA sequences	CTCF_16	DHS_37	enhancer_3	32	88	2	0	115	85	1	66	97.0446	1.25247	83.1248	89.0838	0.329745	1.59684	1.38346	0.0112254
+	chr6	30755096	GGTATTGGTACGTGGTCTCCAGG	GGTATTGGTACGTGGTCTCC	regulatory-gDNA sequences	CTCF_16	DHS_37	enhancer_3	305	453	208	449	1493	1684	1674	1382	446.494	403.111	1396.26	1578.97	0.6831	0.515987	1.06929	1.06019
+	chr6	30755097	GTATTGGTACGTGGTCTCCAGGG	GTATTGGTACGTGGTCTCCA	regulatory-gDNA sequences	CTCF_16	DHS_37	enhancer_3	63	117	1678	166	138	269	217	82	126.219	155.035	220.809	108.318	0.499131	10.8233	0.624975	2.00337
+	chr6	30755112	CTCCAGGGCTGTCTCGCTGAAGG	GCTCCAGGGCTGTCTCGCTGA	regulatory-gDNA sequences	CTCF_16	DHS_37	enhancer_3	8	18	5	4	0	25	17	101	24.0817	6.03616	29.699	130.706	0.332203	0.828342	0	0.130063
-	chr6	30755114	CCAGGGCTGTCTCGCTGAAGGAG	GCCAGGGCTGTCTCGCTGAAG	ineffective-gDNA	CTCF_16	DHS_37	enhancer_3	0	8	73	79	0	19	119	26	12.3235	82.0462	24.0608	39.4333	0	0.889743	0	3.01776
+	chr6	30755129	TGAAGGAGATCTTAAGCTGAAGG	GTGAAGGAGATCTTAAGCTGA	regulatory-gDNA sequences	CTCF_16	DHS_37	enhancer_3	0	0	0	0	0	0	0	0	2.64249	1.25247	5.82205	6.00696	0	0	0	0
+	chr6	30755132	AGGAGATCTTAAGCTGAAGGAGG	GAGGAGATCTTAAGCTGAAGG	regulatory-gDNA sequences	CTCF_16	DHS_37	enhancer_3	0	0	0	0	0	0	0	0	2.64249	1.25247	5.82205	6.00696	0	0	0	0
+	chr6	30755133	GGAGATCTTAAGCTGAAGGAGGG	GGAGATCTTAAGCTGAAGGA	regulatory-gDNA sequences	CTCF_16	DHS_37	enhancer_3	0	0	0	0	0	0	0	0	2.64249	1.25247	5.82205	6.00696	0	0	0	0
+	chr6	30755179	GTCAGCAGGGGAGAAGCCCGCGG	GTCAGCAGGGGAGAAGCCCG	regulatory-gDNA sequences	CTCF_16	DHS_37	enhancer_3	0	0	0	0	0	0	0	0	2.64249	1.25247	5.82205	6.00696	0	0	0	0
+	chr6	30755180	TCAGCAGGGGAGAAGCCCGCGGG	GTCAGCAGGGGAGAAGCCCGC	regulatory-gDNA sequences	CTCF_16	DHS_37	enhancer_3	16	29	0	1	54	11	51	0	36.6818	2.4568	16.4545	6.00696	0.436183	0	3.28177	8.49016
+	chr6	30755181	CAGCAGGGGAGAAGCCCGCGGGG	GCAGCAGGGGAGAAGCCCGCG	regulatory-gDNA sequences	CTCF_16	DHS_37	enhancer_3	0	0	0	0	0	0	0	0	2.64249	1.25247	5.82205	6.00696	0	0	0	0
+	chr6	30755182	AGCAGGGGAGAAGCCCGCGGGGG	GAGCAGGGGAGAAGCCCGCGG	regulatory-gDNA sequences	CTCF_16	DHS_37	enhancer_3	0	2	0	0	0	0	0	0	5.0887	1.25247	5.82205	6.00696	0	0	0	0
+	chr6	30755188	GGAGAAGCCCGCGGGGGTTGAGG	GGAGAAGCCCGCGGGGGTTG	regulatory-gDNA sequences	CTCF_16	DHS_37	enhancer_3	791	1286	2099	1360	2574	2850	2929	2051	1427.64	1253.02	2316.68	2292.96	0.554061	1.67515	1.11107	1.27739
+	chr6	30755189	GAGAAGCCCGCGGGGGTTGAGGG	GAGAAGCCCGCGGGGGTTGA	regulatory-gDNA sequences	CTCF_16	DHS_37	enhancer_3	20	90	4	9	178	221	0	64	99.0199	11.8852	186.534	86.6542	0.20198	0.336553	0.954252	0
-	chr6	30755196	CCGCGGGGGTTGAGGGAGAGAAA	GCCGCGGGGGTTGAGGGAGAG	ineffective-gDNA	CTCF_16	DHS_37	enhancer_3	0	0	0	0	0	0	0	0	2.64249	1.25247	5.82205	6.00696	0	0	0	0
+	chr6	30757625	CTGGGGAAACGATCTGCGGG	GCTGGGGAAACGATCTGCGGG	control-gDNA sequences	-	-	-	321	145	8	8	145	199	274	264	155.179	10.7267	170.673	304.3	2.06858	0.745804	0.849577	0.900428
+	chr6	30757930	ACCCCCCACCAACTTCTGACTGG	GACCCCCCACCAACTTCTGAC	regulatory-gDNA sequences	DHS_38	enhancer_4	-	0	0	0	0	0	0	0	0	2.64249	1.25247	5.82205	6.00696	0	0	0	0
-	chr6	30757931	CCCCCCACCAACTTCTGACTGGG	GCCCCCCACCAACTTCTGACT	ineffective-gDNA	DHS_38	enhancer_4	-	0	0	0	0	0	0	0	0	2.64249	1.25247	5.82205	6.00696	0	0	0	0
-	chr6	30757938	CCAACTTCTGACTGGGCTTCTCA	GCCAACTTCTGACTGGGCTTC	ineffective-gDNA	DHS_38	enhancer_4	-	3687	5788	4600	7137	8115	11356	10228	8849	6960.37	7045.82	8987.95	9512.92	0.529713	0.652869	0.902876	1.07517
+	chr6	30757958	TCAGAAATGCACAGCCTGCATGG	GTCAGAAATGCACAGCCTGCA	regulatory-gDNA sequences	DHS_38	enhancer_4	-	679	1150	258	469	1670	1648	2055	2112	1254.99	418.185	1367.81	2357.84	0.541041	0.616952	1.22093	0.871562
+	chr6	30757959	CAGAAATGCACAGCCTGCATGGG	GCAGAAATGCACAGCCTGCAT	regulatory-gDNA sequences	DHS_38	enhancer_4	-	339	608	304	586	993	1028	960	1108	591.218	502.576	847.844	1264.48	0.573393	0.604884	1.17121	0.759206
+	chr6	30757964	ATGCACAGCCTGCATGGGAGTGG	GATGCACAGCCTGCATGGGAG	regulatory-gDNA sequences	DHS_38	enhancer_4	-	961	1138	1314	2279	1839	1505	2255	2042	1239.74	2209	1254.1	2283.39	0.775164	0.59484	1.46639	0.987568
+	chr6	30757965	TGCACAGCCTGCATGGGAGTGGG	GTGCACAGCCTGCATGGGAGT	regulatory-gDNA sequences	DHS_38	enhancer_4	-	1596	1161	669	1276	2061	2462	1541	2024	1268.96	1164.96	2010.56	2264.24	1.25772	0.574266	1.02509	0.680581
+	chr6	30757966	GCACAGCCTGCATGGGAGTGGGG	GCACAGCCTGCATGGGAGTG	regulatory-gDNA sequences	DHS_38	enhancer_4	-	3996	3795	2421	2569	5850	7039	7097	5859	4553.73	2507.87	5611.34	6339.7	0.877523	0.965361	1.04253	1.11945
-	chr6	30757972	CCTGCATGGGAGTGGGGGGGTAG	GCCTGCATGGGAGTGGGGGGG	ineffective-gDNA	DHS_38	enhancer_4	-	293	533	384	727	886	1119	1011	924	519.161	607.762	927.394	1045.52	0.564373	0.631826	0.955365	0.966987
+	chr6	30757977	ATGGGAGTGGGGGGGTAGAGAGG	GATGGGAGTGGGGGGGTAGAG	regulatory-gDNA sequences	DHS_38	enhancer_4	-	1	2	0	0	0	0	0	0	5.0887	1.25247	5.82205	6.00696	0.196514	0	0	0
+	chr6	30758016	CCTCTCCCATCAGCTATATAAGG	GCCTCTCCCATCAGCTATATA	regulatory-gDNA sequences	DHS_38	enhancer_4	-	0	0	0	0	0	0	0	0	2.64249	1.25247	5.82205	6.00696	0	0	0	0
+	chr6	30758025	TCAGCTATATAAGGTCACAATGG	GTCAGCTATATAAGGTCACAA	regulatory-gDNA sequences	DHS_38	enhancer_4	-	0	0	0	0	0	0	0	0	2.64249	1.25247	5.82205	6.00696	0	0	0	0
+	chr6	30758026	CAGCTATATAAGGTCACAATGGG	GCAGCTATATAAGGTCACAAT	regulatory-gDNA sequences	DHS_38	enhancer_4	-	0	0	0	0	0	0	0	0	2.64249	1.25247	5.82205	6.00696	0	0	0	0
+	chr6	30758027	AGCTATATAAGGTCACAATGGGG	GAGCTATATAAGGTCACAATG	regulatory-gDNA sequences	DHS_38	enhancer_4	-	0	0	0	0	0	0	0	0	2.64249	1.25247	5.82205	6.00696	0	0	0	0
+	chr6	30758031	ATATAAGGTCACAATGGGGCTGG	GATATAAGGTCACAATGGGGC	regulatory-gDNA sequences	DHS_38	enhancer_4	-	38	35	179	362	40	133	16	87	43.3555	332.846	121.648	114.256	0.876475	0.537786	0.328819	0.140037
+	chr6	30758052	GGTCTCTCAGCCCAACCAAGAGG	GGTCTCTCAGCCCAACCAAG	regulatory-gDNA sequences	DHS_38	enhancer_4	-	0	0	0	0	0	0	0	0	2.64249	1.25247	5.82205	6.00696	0	0	0	0
+	chr6	30758059	CAGCCCAACCAAGAGGCCTCTGG	GCAGCCCAACCAAGAGGCCTC	regulatory-gDNA sequences	DHS_38	enhancer_4	-	0	0	0	0	0	0	0	0	2.64249	1.25247	5.82205	6.00696	0	0	0	0
+	chr6	30758060	AGCCCAACCAAGAGGCCTCTGGG	GAGCCCAACCAAGAGGCCTCT	regulatory-gDNA sequences	DHS_38	enhancer_4	-	0	0	0	0	0	0	0	0	2.64249	1.25247	5.82205	6.00696	0	0	0	0
-	chr6	30758062	CCCAACCAAGAGGCCTCTGGGGT	GCCCAACCAAGAGGCCTCTGG	ineffective-gDNA	DHS_38	enhancer_4	-	0	0	0	0	0	0	0	0	2.64249	1.25247	5.82205	6.00696	0	0	0	0
-	chr6	30758063	CCAACCAAGAGGCCTCTGGGGTA	GCCAACCAAGAGGCCTCTGGG	ineffective-gDNA	DHS_38	enhancer_4	-	0	0	0	0	0	0	0	0	2.64249	1.25247	5.82205	6.00696	0	0	0	0
+	chr6	30758065	AACCAAGAGGCCTCTGGGGTAGG	GAACCAAGAGGCCTCTGGGGT	regulatory-gDNA sequences	DHS_38	enhancer_4	-	286	109	218	62	228	209	278	266	118.066	66.5898	177.899	306.249	2.42237	3.27378	1.28162	0.907759
+	chr6	30758066	ACCAAGAGGCCTCTGGGGTAGGG	GACCAAGAGGCCTCTGGGGTA	regulatory-gDNA sequences	DHS_38	enhancer_4	-	17	9	0	0	0	34	0	0	13.5151	1.25247	38.0549	6.00696	1.25785	0	0	0
-	chr6	30758067	CCAAGAGGCCTCTGGGGTAGGGC	GCCAAGAGGCCTCTGGGGTAG	ineffective-gDNA	DHS_38	enhancer_4	-	186	418	134	199	721	1030	868	874	415.363	182.418	849.596	985.674	0.447801	0.734575	0.848638	0.880615
-	chr6	30758283	CCTGAAGAACAGGTTGCTGACAG	GCCTGAAGAACAGGTTGCTGA	ineffective-gDNA	DHS_39	enhancer_5	-	0	0	0	0	0	0	0	0	2.64249	1.25247	5.82205	6.00696	0	0	0	0
+	chr6	30758284	CTGAAGAACAGGTTGCTGACAGG	GCTGAAGAACAGGTTGCTGAC	regulatory-gDNA sequences	DHS_39	enhancer_5	-	33	21	5	29	40	90	148	84	27.5481	33.9591	87.2997	110.697	1.19791	0.147236	0.458192	1.33698
+	chr6	30758285	TGAAGAACAGGTTGCTGACAGGG	GTGAAGAACAGGTTGCTGACA	regulatory-gDNA sequences	DHS_39	enhancer_5	-	0	0	0	0	0	0	0	0	2.64249	1.25247	5.82205	6.00696	0	0	0	0
+	chr6	30758286	GAAGAACAGGTTGCTGACAGGGG	GAAGAACAGGTTGCTGACAG	regulatory-gDNA sequences	DHS_39	enhancer_5	-	0	0	0	0	0	0	0	0	2.64249	1.25247	5.82205	6.00696	0	0	0	0
+	chr6	30758287	AAGAACAGGTTGCTGACAGGGGG	GAAGAACAGGTTGCTGACAGG	regulatory-gDNA sequences	DHS_39	enhancer_5	-	0	0	0	0	0	0	0	19	2.64249	1.25247	5.82205	30.5275	0	0	0	0
+	chr6	30758293	AGGTTGCTGACAGGGGGTAGAGG	GAGGTTGCTGACAGGGGGTAG	regulatory-gDNA sequences	DHS_39	enhancer_5	-	332	528	37	45	1198	778	746	619	514.52	50.2891	629.132	682.948	0.645262	0.735745	1.90421	1.09232
+	chr6	30758294	GGTTGCTGACAGGGGGTAGAGGG	GGTTGCTGACAGGGGGTAGA	regulatory-gDNA sequences	DHS_39	enhancer_5	-	0	2	0	2	64	0	70	133	5.0887	3.6564	5.82205	167.377	0	0	10.9927	0.418218
+	chr6	30758297	TGCTGACAGGGGGTAGAGGGTGG	GTGCTGACAGGGGGTAGAGGG	regulatory-gDNA sequences	DHS_39	enhancer_5	-	0	0	0	0	0	0	0	0	2.64249	1.25247	5.82205	6.00696	0	0	0	0
+	chr6	30758321	GGGTGAGGCGTCTGGGTCAGAGG	GGGTGAGGCGTCTGGGTCAG	regulatory-gDNA sequences	DHS_39	enhancer_5	-	32	55	88	84	321	127	46	127	64.3826	86.4668	117.003	160.595	0.497028	1.01773	2.74353	0.286435
-	chr6	30758364	CCACCCCCACCCAAGCAGCGGCT	GCCACCCCCACCCAAGCAGCG	ineffective-gDNA	DHS_39	enhancer_5	-	1287	655	344	594	652	1175	858	745	639.376	508.283	976.079	831.654	2.0129	0.676788	0.667979	1.03168
-	chr6	30758368	CCCCACCCAAGCAGCGGCTGCTT	GCCCCACCCAAGCAGCGGCTG	ineffective-gDNA	DHS_39	enhancer_5	-	288	400	208	250	579	463	602	624	399.392	227.401	363.255	688.798	0.721095	0.914683	1.59392	0.873987
-	chr6	30758369	CCCACCCAAGCAGCGGCTGCTTC	GCCCACCCAAGCAGCGGCTGC	ineffective-gDNA	DHS_39	enhancer_5	-	1910	2365	2010	2350	5193	6113	5567	5894	2785.61	2282.29	4884.62	6376.86	0.685667	0.880694	1.06313	0.873
-	chr6	30758373	CCCAAGCAGCGGCTGCTTCCTTA	GCCCAAGCAGCGGCTGCTTCC	ineffective-gDNA	DHS_39	enhancer_5	-	181	478	393	714	788	961	925	857	468.901	597.418	789.104	965.331	0.386009	0.657831	0.998601	0.958221
-	chr6	30758374	CCAAGCAGCGGCTGCTTCCTTAT	GCCAAGCAGCGGCTGCTTCCT	ineffective-gDNA	DHS_39	enhancer_5	-	0	27	0	0	0	21	0	0	34.4129	1.25247	25.9464	6.00696	0	0	0	0
-	chr6	30758410	CCTGAGCACAGATCTGGCAGGCC	GCCTGAGCACAGATCTGGCAG	ineffective-gDNA	DHS_39	enhancer_5	-	0	0	0	0	0	0	0	0	2.64249	1.25247	5.82205	6.00696	0	0	0	0
-	chr6	30758439	CCAGGGCCCAGGGTTCCCCACTC	GCCAGGGCCCAGGGTTCCCCA	ineffective-gDNA	DHS_39	enhancer_5	-	33	48	1	0	0	117	0	54	57.2017	1.25247	109.163	74.4192	0.576906	0.798421	0	0
+	chr6	30758458	ACTCAGCCCCACCAGCCTTCCGG	GACTCAGCCCCACCAGCCTTC	regulatory-gDNA sequences	DHS_39	enhancer_5	-	170	344	194	248	82	328	641	489	349.467	225.543	262.88	532.91	0.486456	0.860145	0.31193	1.20283
+	chr6	30758484	CCACCCCAGGCTTCCTGTTTGGG	GCCACCCCAGGCTTCCTGTTT	regulatory-gDNA sequences	DHS_39	enhancer_5	-	1168	801	323	453	1573	1702	1201	1343	810.382	406.151	1410.48	1535.53	1.4413	0.79527	1.11523	0.782142
-	chr6	30758487	CCCCAGGCTTCCTGTTTGGGCGA	GCCCCAGGCTTCCTGTTTGGG	ineffective-gDNA	DHS_39	enhancer_5	-	1183	2043	1329	2128	3343	3605	3944	3464	2382.54	2052.85	2911.87	3795.31	0.496529	0.647393	1.14806	1.03918
-	chr6	30758488	CCCAGGCTTCCTGTTTGGGCGAT	GCCCAGGCTTCCTGTTTGGGC	ineffective-gDNA	DHS_39	enhancer_5	-	3114	3483	3601	5152	5078	6288	6292	5948	4170.97	5112.31	5022.03	6434.2	0.74659	0.704379	1.01115	0.977899
-	chr6	30758489	CCAGGCTTCCTGTTTGGGCGATC	GCCAGGCTTCCTGTTTGGGCG	ineffective-gDNA	DHS_39	enhancer_5	-	4927	7133	5167	8626	12412	15092	13331	13346	8548.35	8459.16	11895.9	14279.8	0.576369	0.610817	1.04339	0.933559
-	chr6	30758497	CCTGTTTGGGCGATCTGCTTCCG	GCCTGTTTGGGCGATCTGCTT	ineffective-gDNA	DHS_39	enhancer_5	-	4	19	61	142	101	44	0	32	25.2399	135.368	47.2043	47.0146	0.158479	0.450624	2.13964	0
+	chr6	30758498	CTGTTTGGGCGATCTGCTTCCGG	GCTGTTTGGGCGATCTGCTTC	regulatory-gDNA sequences	DHS_39	enhancer_5	-	36	99	37	128	191	123	107	128	107.98	123.837	113.882	161.728	0.333394	0.298779	1.67717	0.661604
-	chr6	30758698	CCGGAAATGCTACCCGGGTG	GCCGGAAATGCTACCCGGGTG	control-gDNA sequences	-	-	-	1183	1053	3999	710	1994	2769	2732	2449	1131.64	594.271	2252.78	2716.22	1.04539	6.72925	0.885127	1.00581
-	chr6	30758868	GATACGGGTTAAGCCTTGGG	GATACGGGTTAAGCCTTGGG	control-gDNA sequences	-	-	-	0	4	15	45	37	53	43	40	7.51709	50.2891	55.3251	57.0508	0	0.298275	0.668774	0.753715
-	chr6	30760246	GAAGCGGTACCCAACTGCCG	GAAGCGGTACCCAACTGCCG	control-gDNA sequences	-	-	-	214	392	110	195	1027	973	1207	624	392.292	179.053	799.628	688.798	0.545513	0.614343	1.28435	1.75233
-	chr6	30761321	GTCCGAGGGAGACCAGAGAG	GTCCGAGGGAGACCAGAGAG	control-gDNA sequences	-	-	-	0	0	0	0	0	0	0	0	2.64249	1.25247	5.82205	6.00696	0	0	0	0
-	chr6	30761492	ACCGATTCATCCGGCAGGAG	GACCGATTCATCCGGCAGGAG	control-gDNA sequences	-	-	-	9	49	0	20	94	40	75	116	58.2377	24.2747	43.561	148.051	0.154539	0	2.15789	0.506582
+	chr6	30761502	ATGAATCGGTTCTGGTGCAC	GATGAATCGGTTCTGGTGCAC	control-gDNA sequences	-	-	-	286	546	285	530	1205	953	1575	1193	531.309	462.661	782.088	1364.06	0.538293	0.616002	1.54075	1.15464
-	chr6	30761622	GAGCGCCGCCGGGCCAAGCT	GAGCGCCGCCGGGCCAAGCT	control-gDNA sequences	-	-	-	16	31	54	124	68	36	0	15	38.929	120.522	39.8959	25.4083	0.411005	0.448049	1.70444	0
-	chr6	30761729	TACAGCTGCTAGCCCGGCGC	GTACAGCTGCTAGCCCGGCGC	control-gDNA sequences	-	-	-	50	122	210	125	210	189	134	263	131.348	121.352	163.415	303.324	0.380669	1.7305	1.28507	0.441771
+	chr6	30761764	TGGTGGCCATGGTCGTCTTGAGG	GTGGTGGCCATGGTCGTCTTG	regulatory-gDNA sequences	DHS_40	-	-	538	709	373	604	1275	1291	1582	1353	698.442	515.435	1075.87	1546.72	0.770285	0.723661	1.18509	1.02281
+	chr6	30761769	GCCATGGTCGTCTTGAGGTGAGG	GCCATGGTCGTCTTGAGGTG	regulatory-gDNA sequences	DHS_40	-	-	147	396	198	303	1064	1116	3734	941	395.843	279.142	924.779	1065.85	0.37136	0.709316	1.15055	3.5033
+	chr6	30761770	CCATGGTCGTCTTGAGGTGAGGG	GCCATGGTCGTCTTGAGGTGA	regulatory-gDNA sequences	DHS_40	-	-	74	158	11	42	47	29	189	231	168.756	47.3067	33.4275	271.732	0.438502	0.232525	1.40603	0.695539
+	chr6	30761774	GGTCGTCTTGAGGTGAGGGTAGG	GGTCGTCTTGAGGTGAGGGT	regulatory-gDNA sequences	DHS_40	-	-	54	65	3	17	727	70	20	66	74.4094	20.9584	70.3344	89.0838	0.725714	0.143141	10.3363	0.224508
+	chr6	30761775	GTCGTCTTGAGGTGAGGGTAGGG	GTCGTCTTGAGGTGAGGGTA	regulatory-gDNA sequences	DHS_40	-	-	0	0	0	0	0	0	0	0	2.64249	1.25247	5.82205	6.00696	0	0	0	0
+	chr6	30761784	AGGTGAGGGTAGGGAGCACTGGG	GAGGTGAGGGTAGGGAGCACT	regulatory-gDNA sequences	DHS_40	-	-	10	55	0	0	130	45	58	41	64.3826	1.25247	48.1117	58.2996	0.155321	0	2.70204	0.994861
+	chr6	30761785	GGTGAGGGTAGGGAGCACTGGGG	GGTGAGGGTAGGGAGCACTG	regulatory-gDNA sequences	DHS_40	-	-	0	0	5	13	0	0	69	91	2.64249	16.4645	5.82205	118.982	0	0.303683	0	0.579919
+	chr6	30761829	CTCCAGAGAGTGAGACAGCCCGG	GCTCCAGAGAGTGAGACAGCC	regulatory-gDNA sequences	DHS_40	-	-	33	106	96	123	1	111	117	153	115.027	119.692	104.397	189.687	0.286888	0.802058	0.0095788	0.616805
+	chr6	30761830	TCCAGAGAGTGAGACAGCCCGGG	GTCCAGAGAGTGAGACAGCCC	regulatory-gDNA sequences	DHS_40	-	-	0	0	0	0	0	0	0	0	2.64249	1.25247	5.82205	6.00696	0	0	0	0
+	chr6	30761831	CCAGAGAGTGAGACAGCCCGGGG	GCCAGAGAGTGAGACAGCCCG	regulatory-gDNA sequences	DHS_40	-	-	4	10	0	0	0	32	0	0	14.703	1.25247	36.2083	6.00696	0.272053	0	0	0
+	chr6	30761843	ACAGCCCGGGGGTGAGACTGAGG	GACAGCCCGGGGGTGAGACTG	regulatory-gDNA sequences	DHS_40	-	-	56	237	81	149	475	373	231	517	249.942	141.107	295.413	564.854	0.224052	0.574033	1.60792	0.408955
-	chr6	30761847	CCCGGGGGTGAGACTGAGGGTGG	GCCCGGGGGTGAGACTGAGGG	ineffective-gDNA	DHS_40	-	-	0	0	0	0	0	0	0	0	2.64249	1.25247	5.82205	6.00696	0	0	0	0
+	chr6	30761851	GGGGTGAGACTGAGGGTGGGAGG	GGGGTGAGACTGAGGGTGGG	regulatory-gDNA sequences	DHS_40	-	-	11	13	81	84	270	95	153	36	18.245	86.4668	91.4328	52.0428	0.602906	0.936776	2.95299	2.93989
+	chr6	30761910	GGGCAGAGGGGCTAAGGATGAGG	GGGCAGAGGGGCTAAGGATG	regulatory-gDNA sequences	DHS_40	-	-	7	3	0	0	0	36	0	24	6.30508	1.25247	39.8959	36.8955	1.11022	0	0	0
+	chr6	30761918	GGGCTAAGGATGAGGACAGAGGG	GGGCTAAGGATGAGGACAGA	regulatory-gDNA sequences	DHS_40	-	-	0	0	0	0	0	0	0	0	2.64249	1.25247	5.82205	6.00696	0	0	0	0
+	chr6	30762506	ATAGCCACCCCCGAGACTTT	GATAGCCACCCCCGAGACTTT	control-gDNA sequences	-	-	-	100	157	116	170	485	414	353	357	167.711	158.32	325.741	394.164	0.596265	0.732692	1.48891	0.895566
+	chr6	30762514	CCCCGAGACTTTCGGAACCC	GCCCCGAGACTTTCGGAACCC	control-gDNA sequences	-	-	-	16	26	0	4	95	253	145	140	33.2744	6.03616	209.415	175.236	0.48085	0	0.453645	0.827454
-	chr6	30762519	CGCCCGGGTTCCGAAAGTCT	GCGCCCGGGTTCCGAAAGTCT	control-gDNA sequences	-	-	-	19	66	156	314	194	134	86	46	75.4011	289.611	122.418	64.5256	0.251986	0.538654	1.58474	1.33281
+	chr6	30762522	CTTTCGGAACCCGGGCGTCA	GCTTTCGGAACCCGGGCGTCA	control-gDNA sequences	-	-	-	38	70	74	89	180	316	237	173	79.3537	90.8416	254.291	211.563	0.478869	0.814605	0.707849	1.12024
+	chr6	30762935	GAGAGGGACCGAGGGAGATCCGG	GAGAGGGACCGAGGGAGATC	regulatory-gDNA sequences	DHS_41	Promoter_9	-	0	0	0	0	0	0	0	0	2.64249	1.25247	5.82205	6.00696	0	0	0	0
+	chr6	30762942	ACCGAGGGAGATCCGGAGACTGG	GACCGAGGGAGATCCGGAGAC	regulatory-gDNA sequences	DHS_41	Promoter_9	-	0	0	0	0	0	0	0	0	2.64249	1.25247	5.82205	6.00696	0	0	0	0
+	chr6	30762951	GATCCGGAGACTGGAGGGAGGGG	GATCCGGAGACTGGAGGGAG	regulatory-gDNA sequences	DHS_41	Promoter_9	-	28	80	0	3	506	381	399	177	89.1789	4.84919	301.27	215.872	0.313976	0	1.67956	1.84832
+	chr6	30763001	AGGCAGCAAAGGAGGAGGGACGG	GAGGCAGCAAAGGAGGAGGGA	regulatory-gDNA sequences	DHS_41	Promoter_9	-	0	0	0	0	0	0	0	0	2.64249	1.25247	5.82205	6.00696	0	0	0	0
+	chr6	30763018	GGACGGAGACAGAGACCAGGGGG	GGACGGAGACAGAGACCAGG	regulatory-gDNA sequences	DHS_41	Promoter_9	-	0	0	0	0	0	0	0	0	2.64249	1.25247	5.82205	6.00696	0	0	0	0
+	chr6	30763026	ACAGAGACCAGGGGGCCGGGCGG	GACAGAGACCAGGGGGCCGGG	regulatory-gDNA sequences	DHS_41	Promoter_9	-	53	90	23	38	44	197	50	26	99.0199	43.2751	169.224	39.4333	0.535246	0.531483	0.26001	1.26797
+	chr6	30763027	CAGAGACCAGGGGGCCGGGCGGG	GCAGAGACCAGGGGGCCGGGC	regulatory-gDNA sequences	DHS_41	Promoter_9	-	358	433	169	424	1141	724	1243	864	428.683	383.785	582.359	973.707	0.835116	0.440351	1.95927	1.27656
+	chr6	30763028	AGAGACCAGGGGGCCGGGCGGGG	GAGAGACCAGGGGGCCGGGCG	regulatory-gDNA sequences	DHS_41	Promoter_9	-	241	505	265	579	446	1198	967	812	493.372	497.589	995.991	911.525	0.488475	0.532568	0.447795	1.06086
-	chr6	30763041	CCGGGCGGGGGCGGCGACCGCTT	GCCGGGCGGGGGCGGCGACCG	ineffective-gDNA	DHS_41	Promoter_9	-	0	0	0	0	0	0	0	11	2.64249	1.25247	5.82205	20.2665	0	0	0	0
+	chr6	30763050	GGCGGCGACCGCTTTGTCTAAGG	GGCGGCGACCGCTTTGTCTA	regulatory-gDNA sequences	DHS_41	Promoter_9	-	0	0	0	0	0	0	0	0	2.64249	1.25247	5.82205	6.00696	0	0	0	0
-	chr6	30763058	CCGCTTTGTCTAAGGACAATGAG	GCCGCTTTGTCTAAGGACAAT	ineffective-gDNA	DHS_41	Promoter_9	-	0	0	0	0	0	0	0	0	2.64249	1.25247	5.82205	6.00696	0	0	0	0
+	chr6	30763059	CGCTTTGTCTAAGGACAATGAGG	GCGCTTTGTCTAAGGACAATG	regulatory-gDNA sequences	DHS_41	Promoter_9	-	0	0	0	0	0	0	0	0	2.64249	1.25247	5.82205	6.00696	0	0	0	0
+	chr6	30763064	TGTCTAAGGACAATGAGGAGAGG	GTGTCTAAGGACAATGAGGAG	regulatory-gDNA sequences	DHS_41	Promoter_9	-	1	32	16	55	0	35	0	46	40.0439	59.9938	38.9761	64.5256	0.0249726	0.266694	0	0
+	chr6	30763065	GTCTAAGGACAATGAGGAGAGGG	GTCTAAGGACAATGAGGAGA	regulatory-gDNA sequences	DHS_41	Promoter_9	-	0	0	0	0	0	0	0	0	2.64249	1.25247	5.82205	6.00696	0	0	0	0
-	chr6	30763138	CAGCGAGTCCCACGCGGGGT	GCAGCGAGTCCCACGCGGGGT	control-gDNA sequences	-	-	-	122	231	41	63	458	388	425	448	243.99	67.52	306.416	487.081	0.500021	0.607228	1.4947	0.872544
-	chr6	30763138	ACCCCGCGTGGGACTCGCTG	GACCCCGCGTGGGACTCGCTG	control-gDNA sequences	-	-	-	261	483	46	124	449	1002	838	851	473.409	120.522	825.057	958.152	0.551321	0.381671	0.544205	0.8746
+	chr6	30763423	CCTTTGTTTTGCGGGGTCGA	GCCTTTGTTTTGCGGGGTCGA	control-gDNA sequences	-	-	-	1136	1614	1446	2677	2035	2825	4767	3430	1842.66	2618.83	2296.96	3759.17	0.616501	0.552154	0.885955	1.2681
+	chr6	30763599	AAAAAGGGGATTTGAAGGAATGG	GAAAAAGGGGATTTGAAGGAA	regulatory-gDNA sequences	CTCF_17	DHS_42	-	0	0	0	0	0	0	0	0	2.64249	1.25247	5.82205	6.00696	0	0	0	0
+	chr6	30763605	GGGATTTGAAGGAATGGGAATGG	GGGATTTGAAGGAATGGGAA	regulatory-gDNA sequences	CTCF_17	DHS_42	-	0	0	0	0	0	0	0	0	2.64249	1.25247	5.82205	6.00696	0	0	0	0
+	chr6	30763607	GATTTGAAGGAATGGGAATGGGG	GATTTGAAGGAATGGGAATG	regulatory-gDNA sequences	CTCF_17	DHS_42	-	0	11	0	0	21	32	0	0	15.8872	1.25247	36.2083	6.00696	0	0	0.579978	0
+	chr6	30763613	AAGGAATGGGAATGGGGACCCGG	GAAGGAATGGGAATGGGGACC	regulatory-gDNA sequences	CTCF_17	DHS_42	-	10	2	0	0	0	0	0	32	5.0887	1.25247	5.82205	47.0146	1.96514	0	0	0
+	chr6	30763622	GAATGGGGACCCGGCCGCTCTGG	GAATGGGGACCCGGCCGCTC	regulatory-gDNA sequences	CTCF_17	DHS_42	-	3	5	0	0	75	0	0	0	8.72483	1.25247	5.82205	6.00696	0.343846	0	12.8821	0
+	chr6	30763630	ACCCGGCCGCTCTGGCAAAGTGG	GACCCGGCCGCTCTGGCAAAG	regulatory-gDNA sequences	CTCF_17	DHS_42	-	0	0	0	0	0	0	0	0	2.64249	1.25247	5.82205	6.00696	0	0	0	0
-	chr6	30763631	CCCGGCCGCTCTGGCAAAGTGGG	GCCCGGCCGCTCTGGCAAAGT	ineffective-gDNA	CTCF_17	DHS_42	-	0	20	0	0	0	0	0	0	26.3954	1.25247	5.82205	6.00696	0	0	0	0
-	chr6	30763632	CCGGCCGCTCTGGCAAAGTGGGG	GCCGGCCGCTCTGGCAAAGTG	ineffective-gDNA	CTCF_17	DHS_42	-	23	35	2	12	49	161	0	94	43.3555	15.3278	142.833	122.513	0.530498	0.130482	0.343057	0
+	chr6	30763633	CGGCCGCTCTGGCAAAGTGGGGG	GCGGCCGCTCTGGCAAAGTGG	regulatory-gDNA sequences	CTCF_17	DHS_42	-	63	43	91	203	187	230	84	77	51.9644	185.801	192.987	102.345	1.21237	0.489771	0.968976	0.820751
-	chr6	30763636	CCGCTCTGGCAAAGTGGGGGCGG	GCCGCTCTGGCAAAGTGGGGG	ineffective-gDNA	CTCF_17	DHS_42	-	70	162	141	226	40	201	251	188	172.94	205.671	172.121	227.586	0.404766	0.68556	0.232395	1.10288
+	chr6	30763637	CGCTCTGGCAAAGTGGGGGCGGG	GCGCTCTGGCAAAGTGGGGGC	regulatory-gDNA sequences	CTCF_17	DHS_42	-	403	632	73	127	1003	858	805	1480	615.47	123.01	698.872	1685.57	0.654784	0.59345	1.43517	0.477584
+	chr6	30763644	GCAAAGTGGGGGCGGGTCTGCGG	GCAAAGTGGGGGCGGGTCTG	regulatory-gDNA sequences	CTCF_17	DHS_42	-	982	1655	1211	1289	1566	1851	1720	1788	1894.4	1178.6	1528.17	2013.22	0.518371	1.02749	1.02475	0.854351
+	chr6	30763645	CAAAGTGGGGGCGGGTCTGCGGG	GCAAAGTGGGGGCGGGTCTGC	regulatory-gDNA sequences	CTCF_17	DHS_42	-	9532	10823	6714	11303	14622	20045	19418	19559	12765.9	10924	15732.3	20857.3	0.746678	0.614608	0.929427	0.930994
+	chr6	30763646	AAAGTGGGGGCGGGTCTGCGGGG	GAAAGTGGGGGCGGGTCTGCG	regulatory-gDNA sequences	CTCF_17	DHS_42	-	7040	5036	3249	5712	7416	9263	8930	8284	6059.97	5663.62	7353.16	8913.56	1.16172	0.573661	1.00855	1.00184
+	chr6	30763647	AAGTGGGGGCGGGTCTGCGGGGG	GAAGTGGGGGCGGGTCTGCGG	regulatory-gDNA sequences	CTCF_17	DHS_42	-	96	148	143	213	323	365	224	505	158.308	194.345	289.582	551.136	0.606412	0.735804	1.1154	0.406433
+	chr6	30763664	CGGGGGTGGCCGAACCCCAGCGG	GCGGGGGTGGCCGAACCCCAG	regulatory-gDNA sequences	CTCF_17	DHS_42	-	0	0	0	0	0	0	0	0	2.64249	1.25247	5.82205	6.00696	0	0	0	0
-	chr6	30763673	CCGAACCCCAGCGGTTGCCAGAG	GCCGAACCCCAGCGGTTGCCA	ineffective-gDNA	CTCF_17	DHS_42	-	1360	2973	1692	2369	4434	5366	5328	5511	3541.7	2301.89	4297.74	5970.14	0.383996	0.735047	1.03171	0.892441
+	chr6	30763674	CGAACCCCAGCGGTTGCCAGAGG	GCGAACCCCAGCGGTTGCCAG	regulatory-gDNA sequences	CTCF_17	DHS_42	-	286	560	247	464	1540	1083	719	905	544.536	414.445	895.975	1022.78	0.525218	0.595978	1.7188	0.702987
+	chr6	30763675	GAACCCCAGCGGTTGCCAGAGGG	GAACCCCAGCGGTTGCCAGA	regulatory-gDNA sequences	CTCF_17	DHS_42	-	22	54	0	0	0	195	0	6	63.3663	1.25247	167.774	13.807	0.347188	0	0	0
-	chr6	30763678	CCCCAGCGGTTGCCAGAGGGCGT	GCCCCAGCGGTTGCCAGAGGG	ineffective-gDNA	CTCF_17	DHS_42	-	0	0	0	0	0	0	0	0	2.64249	1.25247	5.82205	6.00696	0	0	0	0
-	chr6	30763679	CCCAGCGGTTGCCAGAGGGCGTG	GCCCAGCGGTTGCCAGAGGGC	ineffective-gDNA	CTCF_17	DHS_42	-	132	344	91	164	360	556	572	510	349.467	153.395	439.273	556.847	0.377718	0.593241	0.819536	1.02721
-	chr6	30763680	CCAGCGGTTGCCAGAGGGCGTGG	GCCAGCGGTTGCCAGAGGGCG	ineffective-gDNA	CTCF_17	DHS_42	-	434	499	882	366	490	937	1427	529	487.905	336.285	768.058	578.612	0.889518	2.62278	0.637973	2.46625
+	chr6	30763683	GCGGTTGCCAGAGGGCGTGGTGG	GCGGTTGCCAGAGGGCGTGG	regulatory-gDNA sequences	CTCF_17	DHS_42	-	61	107	89	219	85	108	375	112	116.039	199.539	101.995	143.453	0.525685	0.446028	0.833372	2.6141
-	chr6	30763690	CCAGAGGGCGTGGTGGCTGCCCA	GCCAGAGGGCGTGGTGGCTGC	ineffective-gDNA	CTCF_17	DHS_42	-	434	336	146	189	429	593	577	694	342.266	174.035	470.401	771.171	1.26802	0.838913	0.911988	0.748212
+	chr6	30763703	TGGCTGCCCAGACTCCAGTTCGG	GTGGCTGCCCAGACTCCAGTT	regulatory-gDNA sequences	CTCF_17	DHS_42	-	2776	1855	1342	2731	2345	3578	3536	2642	2146.35	2674.25	2890.59	2921.45	1.29336	0.501823	0.811253	1.21036
-	chr6	30763709	CCCAGACTCCAGTTCGGTGCTCC	GCCCAGACTCCAGTTCGGTGC	ineffective-gDNA	CTCF_17	DHS_42	-	13271	15551	21350	16985	22757	31249	31385	31774	17903.3	15857.4	24342.1	33778.1	0.741259	1.34637	0.934882	0.929153
-	chr6	30763710	CCAGACTCCAGTTCGGTGCTCCC	GCCAGACTCCAGTTCGGTGCT	ineffective-gDNA	CTCF_17	DHS_42	-	5456	6664	6025	8939	10522	11752	12098	11491	7997.84	8752.33	9296.78	12314.2	0.682184	0.688388	1.13179	0.982443
+	chr6	30763713	GACTCCAGTTCGGTGCTCCCAGG	GACTCCAGTTCGGTGCTCCC	regulatory-gDNA sequences	CTCF_17	DHS_42	-	166	306	232	563	564	606	536	478	315.014	486.203	481.395	520.424	0.52696	0.477167	1.17159	1.02993
-	chr6	30763717	CCAGTTCGGTGCTCCCAGGCTCC	GCCAGTTCGGTGCTCCCAGGC	ineffective-gDNA	CTCF_17	DHS_42	-	426	999	822	1561	1474	1511	1712	1798	1062.9	1463.27	1258.95	2023.86	0.400792	0.561757	1.17082	0.845908
+	chr6	30763755	CCAAACTCAGCCCTGTAGCTTGG	GCCAAACTCAGCCCTGTAGCT	regulatory-gDNA sequences	CTCF_17	DHS_42	-	0	29	0	2	0	106	21	0	36.6818	3.6564	100.387	6.00696	0	0	0	3.49595
-	chr6	30765439	TACTACTTTGCGTAGCTATC	GTACTACTTTGCGTAGCTATC	control-gDNA sequences	-	-	-	0	0	0	0	0	0	0	0	2.64249	1.25247	5.82205	6.00696	0	0	0	0
+	chr6	30766355	ACTCCGGTCACCGCCCTTTT	GACTCCGGTCACCGCCCTTTT	control-gDNA sequences	-	-	-	168	286	99	274	472	747	879	945	296.574	250.482	602.245	1070.64	0.566469	0.395238	0.783734	0.821007
-	chr6	30766388	CCTCACTCTCCCGCCTCTCCAAA	GCCTCACTCTCCCGCCTCTCC	ineffective-gDNA	DHS_43	-	-	844	1267	441	812	1973	2151	2079	1854	1403.54	680.888	1765.08	2083.43	0.601337	0.647684	1.1178	0.997875
-	chr6	30766397	CCCGCCTCTCCAAAACTCTAATC	GCCCGCCTCTCCAAAACTCTA	ineffective-gDNA	DHS_43	-	-	0	0	0	0	0	0	0	0	2.64249	1.25247	5.82205	6.00696	0	0	0	0
-	chr6	30766398	CCGCCTCTCCAAAACTCTAATCC	GCCGCCTCTCCAAAACTCTAA	ineffective-gDNA	DHS_43	-	-	0	0	0	0	0	0	0	0	2.64249	1.25247	5.82205	6.00696	0	0	0	0
-	chr6	30766401	CCTCTCCAAAACTCTAATCCTTG	GCCTCTCCAAAACTCTAATCC	ineffective-gDNA	DHS_43	-	-	0	0	0	0	0	0	0	0	2.64249	1.25247	5.82205	6.00696	0	0	0	0
-	chr6	30766406	CCAAAACTCTAATCCTTGAGTTC	GCCAAAACTCTAATCCTTGAG	ineffective-gDNA	DHS_43	-	-	0	0	0	0	0	0	0	0	2.64249	1.25247	5.82205	6.00696	0	0	0	0
-	chr6	30766428	CCTAATTTAGAACTCAGGTCTCC	GCCTAATTTAGAACTCAGGTC	ineffective-gDNA	DHS_43	-	-	0	0	0	0	0	0	0	0	2.64249	1.25247	5.82205	6.00696	0	0	0	0
+	chr6	30766447	CTCCCTCCCCTGTAGCTTCTCGG	GCTCCCTCCCCTGTAGCTTCT	regulatory-gDNA sequences	DHS_43	-	-	25	60	145	262	88	155	57	116	69.4241	238.752	138.354	148.051	0.360106	0.607326	0.63605	0.385003
-	chr6	30766450	CCTCCCCTGTAGCTTCTCGGCCG	GCCTCCCCTGTAGCTTCTCGG	ineffective-gDNA	DHS_43	-	-	527	773	686	1344	1116	1973	1288	1384	774.763	1236.26	1624.53	1581.18	0.680208	0.5549	0.686969	0.814581
-	chr6	30766453	CCCCTGTAGCTTCTCGGCCGCTT	GCCCCTGTAGCTTCTCGGCCG	ineffective-gDNA	DHS_43	-	-	1772	2041	2851	1641	3283	3591	4126	3733	2380.03	1546.77	2900.84	4081.22	0.744528	1.8432	1.13174	1.01097
-	chr6	30766454	CCCTGTAGCTTCTCGGCCGCTTT	GCCCTGTAGCTTCTCGGCCGC	ineffective-gDNA	DHS_43	-	-	5645	7116	6143	7109	12473	13593	11930	13927	8528.45	7018.95	10730.6	14895.2	0.661902	0.875202	1.16237	0.800929
-	chr6	30766455	CCTGTAGCTTCTCGGCCGCTTTC	GCCTGTAGCTTCTCGGCCGCT	ineffective-gDNA	DHS_43	-	-	1484	2347	1796	3024	3424	5133	4472	5071	2763.13	2974.12	4114.56	5502.82	0.537073	0.603876	0.832167	0.812674
+	chr6	30766459	TAGCTTCTCGGCCGCTTTCAAGG	GTAGCTTCTCGGCCGCTTTCA	regulatory-gDNA sequences	DHS_43	-	-	26	40	87	98	32	75	165	45	48.7715	98.6183	74.6438	63.2828	0.533098	0.88219	0.428703	2.60734
-	chr6	30766470	CCGCTTTCAAGGTTCGAGTTCCC	GCCGCTTTCAAGGTTCGAGTT	ineffective-gDNA	DHS_43	-	-	414	682	225	505	781	990	1472	913	668.36	444.646	814.536	1032.35	0.619426	0.506021	0.958829	1.42587
+	chr6	30766478	AAGGTTCGAGTTCCCTCTCTTGG	GAAGGTTCGAGTTCCCTCTCT	regulatory-gDNA sequences	DHS_43	-	-	52	65	3	5	56	118	58	68	74.4094	7.21734	109.953	91.5077	0.698836	0.415666	0.509308	0.633827
-	chr6	30766505	CCCCTGTCATTTGTTTCCAAGCC	GCCCCTGTCATTTGTTTCCAA	ineffective-gDNA	DHS_43	-	-	2	50	0	4	46	34	745	60	59.27	6.03616	38.0549	81.7777	0.0337439	0	1.20878	9.11007
-	chr6	30766506	CCCTGTCATTTGTTTCCAAGCCC	GCCCTGTCATTTGTTTCCAAG	ineffective-gDNA	DHS_43	-	-	50	82	2953	189	45	190	219	162	91.142	174.035	164.142	199.585	0.548594	16.9679	0.274152	1.09728
-	chr6	30766521	CCAAGCCCCGCCCTCAATCCCTC	GCCAAGCCCCGCCCTCAATCC	ineffective-gDNA	DHS_43	-	-	132	268	260	434	135	130	225	336	279.748	391.586	119.33	373.782	0.471853	0.663966	1.13131	0.601955
-	chr6	30766526	CCCCGCCCTCAATCCCTCTCCTA	GCCCCGCCCTCAATCCCTCTC	ineffective-gDNA	DHS_43	-	-	0	0	0	0	0	0	0	0	2.64249	1.25247	5.82205	6.00696	0	0	0	0
-	chr6	30766528	CCGCCCTCAATCCCTCTCCTACG	GCCGCCCTCAATCCCTCTCCT	ineffective-gDNA	DHS_43	-	-	60	100	45	56	142	181	48	92	108.983	60.9455	157.58	120.16	0.550544	0.738365	0.90113	0.399466
+	chr6	30766529	CGCCCTCAATCCCTCTCCTACGG	GCGCCCTCAATCCCTCTCCTA	regulatory-gDNA sequences	DHS_43	-	-	15	20	44	126	97	42	26	12	26.3954	122.181	45.3853	21.5541	0.568282	0.360121	2.13726	1.20627
-	chr6	30766531	CCCTCAATCCCTCTCCTACGGCT	GCCCTCAATCCCTCTCCTACG	ineffective-gDNA	DHS_43	-	-	32	78	80	123	0	53	57	45	87.2165	119.692	55.3251	63.2828	0.366903	0.668382	0	0.900719
-	chr6	30766532	CCTCAATCCCTCTCCTACGGCTC	GCCTCAATCCCTCTCCTACGG	ineffective-gDNA	DHS_43	-	-	41	73	8	18	45	153	113	102	82.3068	22.0689	136.854	131.871	0.498137	0.362501	0.328818	0.8569
-	chr6	30766539	CCCTCTCCTACGGCTCCACCTTC	GCCCTCTCCTACGGCTCCACC	ineffective-gDNA	DHS_43	-	-	1061	2276	2176	3103	4349	4686	3638	4637	2674.39	3054.74	3762.98	5041.79	0.396727	0.712335	1.15573	0.721569
-	chr6	30766540	CCTCTCCTACGGCTCCACCTTCC	GCCTCTCCTACGGCTCCACCT	ineffective-gDNA	DHS_43	-	-	850	1294	482	737	1177	2669	2034	2438	1437.79	615.851	2173.9	2704.53	0.591187	0.782657	0.541424	0.752073
-	chr6	30766545	CCTACGGCTCCACCTTCCTCCTC	GCCTACGGCTCCACCTTCCTC	ineffective-gDNA	DHS_43	-	-	0	0	0	0	0	0	0	0	2.64249	1.25247	5.82205	6.00696	0	0	0	0
+	chr6	30766646	AAAGCGCACGAACTCCACTC	GAAAGCGCACGAACTCCACTC	control-gDNA sequences	-	-	-	0	0	0	0	0	0	0	0	2.64249	1.25247	5.82205	6.00696	0	0	0	0
+	chr6	30766763	GTCGGGATTCCCGCTGCCAC	GTCGGGATTCCCGCTGCCAC	control-gDNA sequences	-	-	-	1707	2293	2657	2100	2518	3736	3990	3559	2695.64	2023.85	3015.07	3896.29	0.633244	1.31284	0.835137	1.02405
-	chr6	30772312	ACTTCACGGGCAACCAGTCT	GACTTCACGGGCAACCAGTCT	control-gDNA sequences	-	-	-	89	99	27	46	271	293	420	365	107.98	51.2757	237.889	401.992	0.824224	0.526565	1.13919	1.0448
-	chr6	30772313	GACTTCACGGGCAACCAGTC	GACTTCACGGGCAACCAGTC	control-gDNA sequences	-	-	-	30	40	197	338	38	160	110	155	48.7715	311.702	142.089	191.894	0.615114	0.632014	0.267439	0.573233
+	chr6	30776205	AGGGTAGTGGAGTTCTCAGGTGG	GAGGGTAGTGGAGTTCTCAGG	regulatory-gDNA sequences	DHS_44	-	-	0	8	0	0	0	21	0	45	12.3235	1.25247	25.9464	63.2828	0	0	0	0
+	chr6	30776221	CAGGTGGATGACATCTCCAAAGG	GCAGGTGGATGACATCTCCAA	regulatory-gDNA sequences	DHS_44	-	-	0	0	0	0	0	0	0	0	2.64249	1.25247	5.82205	6.00696	0	0	0	0
+	chr6	30776222	AGGTGGATGACATCTCCAAAGGG	GAGGTGGATGACATCTCCAAA	regulatory-gDNA sequences	DHS_44	-	-	0	0	0	0	0	0	0	0	2.64249	1.25247	5.82205	6.00696	0	0	0	0
+	chr6	30776223	GGTGGATGACATCTCCAAAGGGG	GGTGGATGACATCTCCAAAG	regulatory-gDNA sequences	DHS_44	-	-	0	0	0	0	0	0	0	0	2.64249	1.25247	5.82205	6.00696	0	0	0	0
+	chr6	30776242	GGGGAGAGGACAAAGGCCTCTGG	GGGGAGAGGACAAAGGCCTC	regulatory-gDNA sequences	DHS_44	-	-	0	0	0	0	0	0	0	0	2.64249	1.25247	5.82205	6.00696	0	0	0	0
+	chr6	30776247	GAGGACAAAGGCCTCTGGCTTGG	GAGGACAAAGGCCTCTGGCT	regulatory-gDNA sequences	DHS_44	-	-	0	0	0	0	0	36	33	0	2.64249	1.25247	39.8959	6.00696	0	0	0	5.49363
+	chr6	30776276	GCTTCAGCACTCCAGTCAGCAGG	GCTTCAGCACTCCAGTCAGC	regulatory-gDNA sequences	DHS_44	-	-	301	755	379	573	1333	1809	2082	1716	752.53	493.319	1495	1936.64	0.399984	0.768266	0.891639	1.07506
+	chr6	30776284	ACTCCAGTCAGCAGGAACTCAGG	GACTCCAGTCAGCAGGAACTC	regulatory-gDNA sequences	DHS_44	-	-	10	79	0	14	0	28	27	82	88.1977	17.5959	32.4976	108.318	0.113382	0	0	0.249267
-	chr6	30776287	CCAGTCAGCAGGAACTCAGGCGA	GCCAGTCAGCAGGAACTCAGG	ineffective-gDNA	DHS_44	-	-	0	0	0	0	0	0	0	0	2.64249	1.25247	5.82205	6.00696	0	0	0	0
+	chr6	30776291	TCAGCAGGAACTCAGGCGAGAGG	GTCAGCAGGAACTCAGGCGAG	regulatory-gDNA sequences	DHS_44	-	-	0	6	0	0	5	0	34	83	9.92841	1.25247	5.82205	109.508	0	0	0.858805	0.31048
+	chr6	30776314	AGGGGCAGCCCAACCCGTAGTGG	GAGGGGCAGCCCAACCCGTAG	regulatory-gDNA sequences	DHS_44	-	-	0	0	0	0	0	0	0	0	2.64249	1.25247	5.82205	6.00696	0	0	0	0
+	chr6	30776319	CAGCCCAACCCGTAGTGGAATGG	GCAGCCCAACCCGTAGTGGAA	regulatory-gDNA sequences	DHS_44	-	-	0	0	0	0	0	0	0	0	2.64249	1.25247	5.82205	6.00696	0	0	0	0
-	chr6	30776322	CCCAACCCGTAGTGGAATGGAGC	GCCCAACCCGTAGTGGAATGG	ineffective-gDNA	DHS_44	-	-	236	323	145	245	361	439	973	1090	330.51	222.774	344.681	1243.23	0.714048	0.650884	1.04735	0.782641
-	chr6	30776323	CCAACCCGTAGTGGAATGGAGCA	GCCAACCCGTAGTGGAATGGA	ineffective-gDNA	DHS_44	-	-	0	0	0	0	0	0	0	0	2.64249	1.25247	5.82205	6.00696	0	0	0	0
-	chr6	30776327	CCCGTAGTGGAATGGAGCAATGA	GCCCGTAGTGGAATGGAGCAA	ineffective-gDNA	DHS_44	-	-	1	21	0	0	0	59	32	30	27.5481	1.25247	60.6825	44.4927	0.0363002	0	0	0.719219
-	chr6	30776328	CCGTAGTGGAATGGAGCAATGAG	GCCGTAGTGGAATGGAGCAAT	ineffective-gDNA	DHS_44	-	-	0	0	0	0	0	0	0	0	2.64249	1.25247	5.82205	6.00696	0	0	0	0
+	chr6	30776329	CGTAGTGGAATGGAGCAATGAGG	GCGTAGTGGAATGGAGCAATG	regulatory-gDNA sequences	DHS_44	-	-	5	18	0	0	44	1	0	0	24.0817	1.25247	6.79725	6.00696	0.207627	0	6.4732	0
+	chr6	30776330	GTAGTGGAATGGAGCAATGAGGG	GTAGTGGAATGGAGCAATGA	regulatory-gDNA sequences	DHS_44	-	-	0	0	0	0	0	0	0	0	2.64249	1.25247	5.82205	6.00696	0	0	0	0
+	chr6	30776341	GAGCAATGAGGGAAGTCCTGAGG	GAGCAATGAGGGAAGTCCTG	regulatory-gDNA sequences	DHS_44	-	-	0	0	0	0	0	0	0	0	2.64249	1.25247	5.82205	6.00696	0	0	0	0
-	chr6	30776357	CCTGAGGGCATGTGATCACAACT	GCCTGAGGGCATGTGATCACA	ineffective-gDNA	DHS_44	-	-	32	42	6	4	17	132	115	37	50.9045	6.03616	120.876	53.2967	0.628628	0.99401	0.14064	2.15773
-	chr6	30778310	CAGCATGCCTCGGTCCTATA	GCAGCATGCCTCGGTCCTATA	control-gDNA sequences	-	-	-	0	0	0	0	0	0	0	0	2.64249	1.25247	5.82205	6.00696	0	0	0	0
-	chr6	30778509	TCGGGAGCGAAGGCTGCTAG	GTCGGGAGCGAAGGCTGCTAG	control-gDNA sequences	-	-	-	0	0	0	0	0	0	0	0	2.64249	1.25247	5.82205	6.00696	0	0	0	0
-	chr6	30778622	CGTCCTTAGTCCCGCAAGGC	GCGTCCTTAGTCCCGCAAGGC	control-gDNA sequences	-	-	-	5	6	0	0	77	85	0	21	9.92841	1.25247	83.1248	33.0788	0.503605	0	0.926318	0
-	chr6	30778928	TGGTCACTGATCGCATCCGC	GTGGTCACTGATCGCATCCGC	control-gDNA sequences	-	-	-	9	44	0	0	112	142	48	53	53.0199	1.25247	128.54	73.1876	0.169747	0	0.871324	0.655849
-	chr6	30779209	TACCAAGCCGCAGCCTCCGA	GTACCAAGCCGCAGCCTCCGA	control-gDNA sequences	-	-	-	122	301	41	59	624	977	478	373	310.427	63.7814	803.136	409.866	0.393007	0.64282	0.776955	1.16624
-	chr6	30779537	AGGTAGATCTAGGTTCACCC	GAGGTAGATCTAGGTTCACCC	control-gDNA sequences	-	-	-	0	0	0	0	0	0	0	0	2.64249	1.25247	5.82205	6.00696	0	0	0	0
-	chr6	30780515	GCCTACGTCTCAGGCTACTA	GCCTACGTCTCAGGCTACTA	control-gDNA sequences	-	-	-	0	0	0	0	0	0	0	0	2.64249	1.25247	5.82205	6.00696	0	0	0	0
+	chr6	30781272	TTCAGAGGTGACAGGTCGGT	GTTCAGAGGTGACAGGTCGGT	control-gDNA sequences	-	-	-	105	193	26	55	492	588	604	552	205.268	59.9938	466.18	605.09	0.511527	0.433378	1.05539	0.998199
-	chr6	30781695	AGCCAACCGTTCGTAAGACC	GAGCCAACCGTTCGTAAGACC	control-gDNA sequences	-	-	-	5	17	0	0	33	65	0	0	22.9205	1.25247	65.977	6.00696	0.218145	0	0.500174	0
+	chr6	30782858	TCCACACGTGGATGATGGTA	GTCCACACGTGGATGATGGTA	control-gDNA sequences	-	-	-	0	6	0	0	27	0	0	19	9.92841	1.25247	5.82205	30.5275	0	0	4.63755	0
+	chr6	30782972	ACAACGGGTGCCGAGGATAA	GACAACGGGTGCCGAGGATAA	control-gDNA sequences	-	-	-	0	0	0	0	0	46	0	0	2.64249	1.25247	49.0179	6.00696	0	0	0	0
-	chr6	30783262	CCTCGTGATAATCAACCCCT	GCCTCGTGATAATCAACCCCT	control-gDNA sequences	-	-	-	0	0	0	0	0	0	0	0	2.64249	1.25247	5.82205	6.00696	0	0	0	0
+	chr6	30784013	GCCTCAAGGTGCGTGTCAAA	GCCTCAAGGTGCGTGTCAAA	control-gDNA sequences	-	-	-	0	0	0	0	0	0	0	0	2.64249	1.25247	5.82205	6.00696	0	0	0	0
+	chr6	30784316	GTCATAGCCTTAGGCGGGCA	GTCATAGCCTTAGGCGGGCA	control-gDNA sequences	-	-	-	92	125	164	218	184	268	209	404	134.435	198.67	220.097	440.923	0.684344	0.825491	0.835994	0.474006
-	chr6	30790818	GGGCGGCTACATATCTTTAG	GGGCGGCTACATATCTTTAG	control-gDNA sequences	-	-	-	0	0	0	0	0	0	0	0	2.64249	1.25247	5.82205	6.00696	0	0	0	0
-	chr6	30791812	ACCATAGGCTTTTGCGGGCG	GACCATAGGCTTTTGCGGGCG	control-gDNA sequences	-	-	-	3198	4507	2791	4613	7209	9623	8591	9027	5421.04	4577.24	7634.65	9701.73	0.589923	0.609756	0.944248	0.885513
+	chr6	30792840	TAAACTCGGAGCGGGGCGCC	GTAAACTCGGAGCGGGGCGCC	control-gDNA sequences	-	-	-	28339	24462	14774	21758	34991	49677	52350	45638	26942.9	19724.1	38352.3	48464.8	1.05182	0.749034	0.912357	1.08017
-	chr6	30792915	GGGCGTACCTTGGGTGCGAC	GGGCGTACCTTGGGTGCGAC	control-gDNA sequences	-	-	-	54	32	0	0	0	76	0	98	40.0439	1.25247	75.5	127.202	1.34852	0	0	0
-	chr6	30792925	AAGGCGGGAGGGGCGTACCT	GAAGGCGGGAGGGGCGTACCT	control-gDNA sequences	-	-	-	19	12	0	0	0	23	0	37	17.0678	1.25247	27.8258	53.2967	1.11321	0	0	0
+	chr6	30792927	GTACGCCCCTCCCGCCTTCT	GTACGCCCCTCCCGCCTTCT	control-gDNA sequences	-	-	-	0	0	0	0	0	0	0	0	2.64249	1.25247	5.82205	6.00696	0	0	0	0
-	chr6	30793002	CGCGCGCGGGGACTTAAAGT	GCGCGCGCGGGGACTTAAAGT	control-gDNA sequences	-	-	-	0	0	0	0	0	0	0	0	2.64249	1.25247	5.82205	6.00696	0	0	0	0
-	chr6	30793016	ACCGTTACTGGTGGCGCGCG	GACCGTTACTGGTGGCGCGCG	control-gDNA sequences	-	-	-	1183	1945	1183	2029	3138	3958	4757	3657	2259.5	1950.28	3189.94	4000.44	0.523567	0.606581	0.983719	1.18912
-	chr6	30793025	TGGGTCGCGACCGTTACTGG	GTGGGTCGCGACCGTTACTGG	control-gDNA sequences	-	-	-	61	117	112	147	59	27	274	179	126.219	139.468	31.5663	218.016	0.483286	0.80305	1.86908	1.25679
+	chr6	30793162	TCAAATAGGTGGTGTCTCCCAGG	GTCAAATAGGTGGTGTCTCCC	regulatory-gDNA sequences	CTCF_18	DHS_45	Promoter_10	175	157	27	49	275	268	161	240	167.711	54.2133	220.097	280.703	1.04346	0.498032	1.24945	0.57356
-	chr6	30793179	CCCAGGCTGCTGAGATCAGTTAA	GCCCAGGCTGCTGAGATCAGT	ineffective-gDNA	CTCF_18	DHS_45	Promoter_10	72	92	0	0	0	28	97	104	101	1.25247	32.4976	134.197	0.712868	0	0	0.722816
-	chr6	30793180	CCAGGCTGCTGAGATCAGTTAAT	GCCAGGCTGCTGAGATCAGTT	ineffective-gDNA	CTCF_18	DHS_45	Promoter_10	182	231	36	83	506	578	481	433	243.99	85.5866	457.752	471.016	0.745933	0.420627	1.1054	1.0212
+	chr6	30793187	GCTGAGATCAGTTAATGAGACGG	GCTGAGATCAGTTAATGAGA	regulatory-gDNA sequences	CTCF_18	DHS_45	Promoter_10	0	0	0	0	0	0	0	0	2.64249	1.25247	5.82205	6.00696	0	0	0	0
-	chr6	30793220	CCGCCGTGCGCCAACAGAATAAT	GCCGCCGTGCGCCAACAGAAT	ineffective-gDNA	CTCF_18	DHS_45	Promoter_10	0	0	0	0	0	0	0	0	2.64249	1.25247	5.82205	6.00696	0	0	0	0
-	chr6	30793223	CCGTGCGCCAACAGAATAATGCA	GCCGTGCGCCAACAGAATAAT	ineffective-gDNA	CTCF_18	DHS_45	Promoter_10	0	0	0	0	0	0	0	0	2.64249	1.25247	5.82205	6.00696	0	0	0	0
-	chr6	30793230	CCAACAGAATAATGCACGTCGAT	GCCAACAGAATAATGCACGTC	ineffective-gDNA	CTCF_18	DHS_45	Promoter_10	74	183	73	191	1199	282	252	319	194.876	175.704	230.059	357.396	0.379728	0.415472	5.2117	0.7051
+	chr6	30793233	ACAGAATAATGCACGTCGATTGG	GACAGAATAATGCACGTCGAT	regulatory-gDNA sequences	CTCF_18	DHS_45	Promoter_10	981	47	1	1	86	77	99	122	56.1621	2.4568	76.3544	154.911	17.4673	0.407033	1.12633	0.639076
+	chr6	30793234	CAGAATAATGCACGTCGATTGGG	GCAGAATAATGCACGTCGATT	regulatory-gDNA sequences	CTCF_18	DHS_45	Promoter_10	710	93	95	309	53	127	36	125	101.993	284.88	117.003	158.325	6.96125	0.333473	0.452982	0.22738
+	chr6	30793245	ACGTCGATTGGGCAGCTCCAAGG	GACGTCGATTGGGCAGCTCCA	regulatory-gDNA sequences	CTCF_18	DHS_45	Promoter_10	177	258	252	375	593	679	639	341	270.295	343.938	543.63	378.617	0.654841	0.732689	1.09082	1.68772
+	chr6	30793246	CGTCGATTGGGCAGCTCCAAGGG	GCGTCGATTGGGCAGCTCCAA	regulatory-gDNA sequences	CTCF_18	DHS_45	Promoter_10	0	0	0	0	0	0	0	0	2.64249	1.25247	5.82205	6.00696	0	0	0	0
-	chr6	30793262	CCAAGGGACAACCCACTACCGCT	GCCAAGGGACAACCCACTACC	ineffective-gDNA	CTCF_18	DHS_45	Promoter_10	0	0	0	0	0	0	0	0	2.64249	1.25247	5.82205	6.00696	0	0	0	0
-	chr6	30793273	CCCACTACCGCTTGCCCGCCCAC	GCCCACTACCGCTTGCCCGCC	ineffective-gDNA	CTCF_18	DHS_45	Promoter_10	4001	5693	3501	5961	6972	8725	9049	10441	6847.12	5907.28	6932.25	11201.2	0.584333	0.592659	1.00573	0.807862
-	chr6	30793274	CCACTACCGCTTGCCCGCCCACC	GCCACTACCGCTTGCCCGCCC	ineffective-gDNA	CTCF_18	DHS_45	Promoter_10	5678	7401	11422	6248	10431	16253	13311	14000	8861.41	6186.99	12797	14972.5	0.640756	1.84613	0.815114	0.889029
-	chr6	30793280	CCGCTTGCCCGCCCACCACCCAC	GCCGCTTGCCCGCCCACCACC	ineffective-gDNA	CTCF_18	DHS_45	Promoter_10	136	268	47	125	379	435	594	426	279.748	121.352	341.624	463.643	0.486151	0.387302	1.10941	1.28116
-	chr6	30793288	CCGCCCACCACCCACTTCCCGCG	GCCGCCCACCACCCACTTCCC	ineffective-gDNA	CTCF_18	DHS_45	Promoter_10	797	1231	1083	1601	2755	3452	4621	4149	1357.86	1505.03	2791.3	4523.29	0.586954	0.719587	0.986995	1.0216
-	chr6	30793292	CCACCACCCACTTCCCGCGCAGT	GCCACCACCCACTTCCCGCGC	ineffective-gDNA	CTCF_18	DHS_45	Promoter_10	1174	1606	913	1984	2273	3551	3589	3874	1832.56	1903.6	2869.32	4231.06	0.640635	0.479617	0.792175	0.84825
-	chr6	30793295	CCACCCACTTCCCGCGCAGTTCC	GCCACCCACTTCCCGCGCAGT	ineffective-gDNA	CTCF_18	DHS_45	Promoter_10	4108	2227	1890	3774	3892	4844	4535	4472	2613.09	3735.62	3887.28	4866.49	1.57208	0.50594	1.00122	0.931883
-	chr6	30793298	CCCACTTCCCGCGCAGTTCCAAA	GCCCACTTCCCGCGCAGTTCC	ineffective-gDNA	CTCF_18	DHS_45	Promoter_10	33543	34487	29366	40031	46672	60867	60767	61348	36472.3	32850.7	46807.6	65199.6	0.919684	0.893923	0.997103	0.932015
-	chr6	30793299	CCACTTCCCGCGCAGTTCCAAAC	GCCACTTCCCGCGCAGTTCCA	ineffective-gDNA	CTCF_18	DHS_45	Promoter_10	8003	9738	9674	11781	14177	17718	16828	16378	11546	11354.2	13932.4	17490.6	0.693139	0.852016	1.01756	0.962117
-	chr6	30793305	CCCGCGCAGTTCCAAACCGCGAC	GCCCGCGCAGTTCCAAACCGC	ineffective-gDNA	CTCF_18	DHS_45	Promoter_10	314	471	126	135	457	808	950	707	462.607	129.614	655.231	786.556	0.678762	0.972117	0.697464	1.2078
-	chr6	30793306	CCGCGCAGTTCCAAACCGCGACC	GCCGCGCAGTTCCAAACCGCG	ineffective-gDNA	CTCF_18	DHS_45	Promoter_10	63	82	14	6	131	137	70	362	91.142	8.39278	124.722	399.052	0.691229	1.6681	1.05034	0.175416
-	chr6	30793316	CCAAACCGCGACCAGAGAGTCTG	GCCAAACCGCGACCAGAGAGT	ineffective-gDNA	CTCF_18	DHS_45	Promoter_10	50	62	40	27	221	322	74	57	71.4241	31.8401	258.582	78.105	0.700044	1.25628	0.85466	0.947442
+	chr6	30793317	CAAACCGCGACCAGAGAGTCTGG	GCAAACCGCGACCAGAGAGTC	regulatory-gDNA sequences	CTCF_18	DHS_45	Promoter_10	1937	1446	2267	1851	2006	2814	2855	2317	1630.33	1765.46	2288.28	2575.85	1.1881	1.28408	0.876641	1.10837
-	chr6	30793321	CCGCGACCAGAGAGTCTGGCGCC	GCCGCGACCAGAGAGTCTGGC	ineffective-gDNA	CTCF_18	DHS_45	Promoter_10	99	146	5	15	377	296	256	379	156.222	18.7219	240.025	415.804	0.633714	0.267066	1.57067	0.615674
-	chr6	30793327	CCAGAGAGTCTGGCGCCAGCTGC	GCCAGAGAGTCTGGCGCCAGC	ineffective-gDNA	CTCF_18	DHS_45	Promoter_10	0	0	0	0	0	0	0	0	2.64249	1.25247	5.82205	6.00696	0	0	0	0
+	chr6	30793373	TCATAGACGTCCGACGTGTC	GTCATAGACGTCCGACGTGTC	control-gDNA sequences	-	-	-	444	527	267	358	481	720	570	470	513.593	329.384	578.907	511.374	0.864497	0.810605	0.830877	1.11464
+	chr6	30793466	TTGCGCGTTGCAGTCGTGGC	GTTGCGCGTTGCAGTCGTGGC	control-gDNA sequences	-	-	-	2524	4051	2190	4090	6307	8562	7562	7209	4866.55	4053.87	6804.67	7772.85	0.518642	0.540225	0.926863	0.972874
+	chr6	30793469	CGCGTTGCAGTCGTGGCTGG	GCGCGTTGCAGTCGTGGCTGG	control-gDNA sequences	-	-	-	1229	1088	925	1802	1620	1494	1973	1390	1176.17	1714.49	1245.18	1587.81	1.04492	0.539518	1.30102	1.24259
-	chr6	30793597	TCCGTCAGAGACGTATTCCC	GTCCGTCAGAGACGTATTCCC	control-gDNA sequences	-	-	-	4	5	1	14	0	169	1	0	8.72483	17.5959	148.763	6.00696	0.458461	0.0568315	0	0.166474
+	chr6	30793704	TCCCCACCTTTCGAGGGGCG	GTCCCCACCTTTCGAGGGGCG	control-gDNA sequences	-	-	-	335	174	72	168	214	530	334	562	185.486	156.677	417.554	616.644	1.80606	0.459544	0.512508	0.541642
+	chr6	30793705	CCCCACCTTTCGAGGGGCGA	GCCCCACCTTTCGAGGGGCGA	control-gDNA sequences	-	-	-	0	0	0	0	0	0	0	0	2.64249	1.25247	5.82205	6.00696	0	0	0	0
+	chr6	30794707	ATACATTGATCTGCCCAGCG	GATACATTGATCTGCCCAGCG	control-gDNA sequences	-	-	-	231	526	429	555	716	684	1607	840	512.668	480.509	547.92	944.994	0.450584	0.892804	1.30676	1.70054
-	chr6	30795091	CCGTCTTGAACCCACTCAATTTT	GCCGTCTTGAACCCACTCAAT	ineffective-gDNA	DHS_46	-	-	0	0	0	0	0	0	0	0	2.64249	1.25247	5.82205	6.00696	0	0	0	0
-	chr6	30795115	CCCCCATCAATTACCCCTCTCTC	GCCCCCATCAATTACCCCTCT	ineffective-gDNA	DHS_46	-	-	0	0	0	0	0	0	0	0	2.64249	1.25247	5.82205	6.00696	0	0	0	0
-	chr6	30795116	CCCCATCAATTACCCCTCTCTCG	GCCCCATCAATTACCCCTCTC	ineffective-gDNA	DHS_46	-	-	0	0	0	0	0	0	0	10	2.64249	1.25247	5.82205	18.9775	0	0	0	0
-	chr6	30795117	CCCATCAATTACCCCTCTCTCGT	GCCCATCAATTACCCCTCTCT	ineffective-gDNA	DHS_46	-	-	0	0	0	0	0	0	0	0	2.64249	1.25247	5.82205	6.00696	0	0	0	0
-	chr6	30795128	CCCCTCTCTCGTTTTTCAATACT	GCCCCTCTCTCGTTTTTCAAT	ineffective-gDNA	DHS_46	-	-	0	0	0	0	0	0	0	0	2.64249	1.25247	5.82205	6.00696	0	0	0	0
-	chr6	30795129	CCCTCTCTCGTTTTTCAATACTG	GCCCTCTCTCGTTTTTCAATA	ineffective-gDNA	DHS_46	-	-	0	0	0	0	0	0	0	0	2.64249	1.25247	5.82205	6.00696	0	0	0	0
-	chr6	30795130	CCTCTCTCGTTTTTCAATACTGG	GCCTCTCTCGTTTTTCAATAC	ineffective-gDNA	DHS_46	-	-	0	0	0	0	0	0	0	0	2.64249	1.25247	5.82205	6.00696	0	0	0	0
+	chr6	30795131	CTCTCTCGTTTTTCAATACTGGG	GCTCTCTCGTTTTTCAATACT	regulatory-gDNA sequences	DHS_46	-	-	0	0	0	0	0	0	0	0	2.64249	1.25247	5.82205	6.00696	0	0	0	0
+	chr6	30795152	GGTCTCTTGCAGAGTTGCAGTGG	GGTCTCTTGCAGAGTTGCAG	regulatory-gDNA sequences	DHS_46	-	-	82	68	126	286	96	90	81	103	77.38	262.509	87.2997	133.035	1.05971	0.479984	1.09966	0.608864
+	chr6	30795155	CTCTTGCAGAGTTGCAGTGGCGG	GCTCTTGCAGAGTTGCAGTGG	regulatory-gDNA sequences	DHS_46	-	-	4766	3696	2579	3692	6043	8156	9383	7351	4432.45	3652.79	6486.78	7923.55	1.07525	0.706036	0.931587	1.18419
+	chr6	30795163	GAGTTGCAGTGGCGGCCACCTGG	GAGTTGCAGTGGCGGCCACC	regulatory-gDNA sequences	DHS_46	-	-	1188	776	1570	1289	1402	2014	2441	1932	778.531	1178.6	1656.9	2166.39	1.52595	1.33209	0.846156	1.12676
-	chr6	30795178	CCACCTGGTCAGTGAAATCAGCG	GCCACCTGGTCAGTGAAATCA	ineffective-gDNA	DHS_46	-	-	0	0	0	0	0	0	0	0	2.64249	1.25247	5.82205	6.00696	0	0	0	0
+	chr6	30795218	CTTCATTAACATGTCTAAAGAGG	GCTTCATTAACATGTCTAAAG	regulatory-gDNA sequences	DHS_46	-	-	0	0	0	0	0	0	0	0	2.64249	1.25247	5.82205	6.00696	0	0	0	0
+	chr6	30795222	ATTAACATGTCTAAAGAGGCAGG	GATTAACATGTCTAAAGAGGC	regulatory-gDNA sequences	DHS_46	-	-	0	0	0	0	0	0	0	0	2.64249	1.25247	5.82205	6.00696	0	0	0	0
-	chr6	30795380	GTTTAGAGAAACCGACATCG	GTTTAGAGAAACCGACATCG	control-gDNA sequences	-	-	-	32	64	0	8	43	20	73	87	73.4161	10.7267	25.0043	114.256	0.435871	0	1.7197	0.638918
-	chr6	30795840	CCAAACCGGTACCCACCCATTCG	GCCAAACCGGTACCCACCCAT	ineffective-gDNA	DHS_47	Promoter_11	-	63	266	10	8	454	412	125	462	277.864	10.7267	324.242	502.433	0.22673	0.932255	1.40019	0.248789
-	chr6	30795855	CCCATTCGTCACTTCATTTTGCA	GCCCATTCGTCACTTCATTTT	ineffective-gDNA	DHS_47	Promoter_11	-	0	0	0	0	0	0	0	0	2.64249	1.25247	5.82205	6.00696	0	0	0	0
+	chr6	30795861	CGTCACTTCATTTTGCAGCATGG	GCGTCACTTCATTTTGCAGCA	regulatory-gDNA sequences	DHS_47	Promoter_11	-	187	557	179	288	542	973	975	923	541.688	264.495	799.628	1044.32	0.345217	0.676761	0.677816	0.933623
+	chr6	30795872	TTTGCAGCATGGACAACAATAGG	GTTTGCAGCATGGACAACAAT	regulatory-gDNA sequences	DHS_47	Promoter_11	-	0	0	0	0	0	0	0	0	2.64249	1.25247	5.82205	6.00696	0	0	0	0
+	chr6	30795873	TTGCAGCATGGACAACAATAGGG	GTTGCAGCATGGACAACAATA	regulatory-gDNA sequences	DHS_47	Promoter_11	-	0	0	0	0	0	0	0	0	2.64249	1.25247	5.82205	6.00696	0	0	0	0
+	chr6	30795874	TGCAGCATGGACAACAATAGGGG	GTGCAGCATGGACAACAATAG	regulatory-gDNA sequences	DHS_47	Promoter_11	-	0	0	0	0	0	0	0	0	2.64249	1.25247	5.82205	6.00696	0	0	0	0
-	chr6	30795906	CCCAAAGAGGACTGCGCTCGTCC	GCCCAAAGAGGACTGCGCTCG	ineffective-gDNA	DHS_47	Promoter_11	-	2769	241	102	173	907	427	406	539	253.878	160.788	335.542	590.107	10.9068	0.634376	2.70309	0.688011
-	chr6	30795907	CCAAAGAGGACTGCGCTCGTCCA	GCCAAAGAGGACTGCGCTCGT	ineffective-gDNA	DHS_47	Promoter_11	-	508	345	1756	352	931	866	821	686	350.365	324.145	705.868	761.716	1.44992	5.41733	1.31894	1.07783
+	chr6	30795911	AGAGGACTGCGCTCGTCCACTGG	GAGAGGACTGCGCTCGTCCAC	regulatory-gDNA sequences	DHS_47	Promoter_11	-	41	196	80	128	0	336	290	378	208.374	123.837	268.622	414.813	0.196762	0.64601	0	0.699111
+	chr6	30795919	GCGCTCGTCCACTGGCTCAGAGG	GCGCTCGTCCACTGGCTCAG	regulatory-gDNA sequences	DHS_47	Promoter_11	-	1	45	100	204	111	99	144	52	54.0713	186.65	94.7104	71.9546	0.0184941	0.535763	1.17199	2.00126
+	chr6	30795934	CTCAGAGGCCAATGGACGCCTGG	GCTCAGAGGCCAATGGACGCC	regulatory-gDNA sequences	DHS_47	Promoter_11	-	937	490	378	576	1161	1500	1325	946	479.736	495.454	1250.05	1071.83	1.95316	0.762937	0.928765	1.2362
-	chr6	30795942	CCAATGGACGCCTGGTACATGAC	GCCAATGGACGCCTGGTACAT	ineffective-gDNA	DHS_47	Promoter_11	-	22	47	118	129	45	213	61	49	56.1621	124.664	180.781	68.2465	0.391723	0.946543	0.248919	0.893819
+	chr6	30795945	ATGGACGCCTGGTACATGACCGG	GATGGACGCCTGGTACATGAC	regulatory-gDNA sequences	DHS_47	Promoter_11	-	82	69	48	103	170	126	157	186	78.3674	102.89	116.224	225.47	1.04635	0.466519	1.46269	0.696322
-	chr6	30795952	CCTGGTACATGACCGGCATCGAC	GCCTGGTACATGACCGGCATC	ineffective-gDNA	DHS_47	Promoter_11	-	209	321	102	92	641	681	530	282	328.694	93.4469	545.345	321.767	0.635849	1.09153	1.1754	1.64715
+	chr6	30795960	ATGACCGGCATCGACTAATCAGG	GATGACCGGCATCGACTAATC	regulatory-gDNA sequences	DHS_47	Promoter_11	-	25	21	0	0	0	33	0	0	27.5481	1.25247	37.1323	6.00696	0.907504	0	0	0
+	chr6	30795961	TGACCGGCATCGACTAATCAGGG	GTGACCGGCATCGACTAATCA	regulatory-gDNA sequences	DHS_47	Promoter_11	-	0	1	0	0	0	0	0	0	3.86787	1.25247	5.82205	6.00696	0	0	0	0
-	chr6	30795964	CCGGCATCGACTAATCAGGGCCA	GCCGGCATCGACTAATCAGGG	ineffective-gDNA	DHS_47	Promoter_11	-	64	173	11	9	110	201	297	195	184.441	11.8852	172.121	234.941	0.346994	0.92552	0.639086	1.26415
+	chr6	30795966	GGCATCGACTAATCAGGGCCAGG	GGCATCGACTAATCAGGGCC	regulatory-gDNA sequences	DHS_47	Promoter_11	-	787	1598	1809	1918	2420	2749	2801	2775	1822.46	1835.08	2237.01	3062.86	0.431835	0.985785	1.0818	0.914505
+	chr6	30795976	AATCAGGGCCAGGCTCGATGAGG	GAATCAGGGCCAGGCTCGATG	regulatory-gDNA sequences	DHS_47	Promoter_11	-	602	627	398	377	1224	1531	2357	1474	610.362	345.624	1275.06	1679.15	0.986301	1.15154	0.959952	1.40368
-	chr6	30795984	CCAGGCTCGATGAGGCTTTGTCT	GCCAGGCTCGATGAGGCTTTG	ineffective-gDNA	DHS_47	Promoter_11	-	616	380	326	761	1033	821	446	890	381.629	635.773	666.563	1004.82	1.61413	0.512762	1.54974	0.443859
+	chr6	30795999	CTTTGTCTCCCTACCGCGCGCGG	GCTTTGTCTCCCTACCGCGCG	regulatory-gDNA sequences	DHS_47	Promoter_11	-	132	384	133	225	762	1039	1215	845	385.185	204.79	857.48	950.975	0.342692	0.649445	0.888651	1.27764
+	chr6	30796000	TTTGTCTCCCTACCGCGCGCGGG	GTTTGTCTCCCTACCGCGCGC	regulatory-gDNA sequences	DHS_47	Promoter_11	-	619	918	1084	882	2148	2142	2329	1723	959.682	750.407	1757.97	1944.08	0.645005	1.44455	1.22186	1.19799
+	chr6	30796001	TTGTCTCCCTACCGCGCGCGGGG	GTTGTCTCCCTACCGCGCGCG	regulatory-gDNA sequences	DHS_47	Promoter_11	-	116	258	279	334	391	606	345	372	270.295	308.089	481.395	408.879	0.429161	0.905583	0.812222	0.843771
-	chr6	30796007	CCCTACCGCGCGCGGGGCCGATT	GCCCTACCGCGCGCGGGGCCG	ineffective-gDNA	DHS_47	Promoter_11	-	398	792	306	498	910	1789	1257	1497	798.887	439.556	1479.2	1703.67	0.498193	0.696156	0.615197	0.737821
-	chr6	30796008	CCTACCGCGCGCGGGGCCGATTC	GCCTACCGCGCGCGGGGCCGA	ineffective-gDNA	DHS_47	Promoter_11	-	1341	693	242	617	827	1546	1085	1322	680.477	524.772	1287.08	1511.92	1.97068	0.461152	0.642541	0.71763
+	chr6	30796531	GTAAAAGGGCTCTTCGGGTT	GTAAAAGGGCTCTTCGGGTT	control-gDNA sequences	-	-	-	233	546	108	148	879	787	713	972	531.309	140.288	636.954	1102.91	0.438539	0.769847	1.38001	0.646474
+	chr6	30796532	TAAAAGGGCTCTTCGGGTTT	GTAAAAGGGCTCTTCGGGTTT	control-gDNA sequences	-	-	-	343	625	218	362	327	859	692	915	608.327	332.846	699.746	1034.75	0.563842	0.654958	0.467312	0.668763
+	chr6	30796595	GCTTCTAACGGTCCGAGAAC	GCTTCTAACGGTCCGAGAAC	control-gDNA sequences	-	-	-	0	0	0	0	0	0	0	0	2.64249	1.25247	5.82205	6.00696	0	0	0	0
+	chr6	30796596	CTTCTAACGGTCCGAGAACC	GCTTCTAACGGTCCGAGAACC	control-gDNA sequences	-	-	-	0	0	0	0	0	0	0	0	2.64249	1.25247	5.82205	6.00696	0	0	0	0
+	chr6	30796600	TAACGGTCCGAGAACCGGGCAGG	GTAACGGTCCGAGAACCGGGC	regulatory-gDNA sequences	DHS_48	-	-	0	0	0	0	0	0	0	0	2.64249	1.25247	5.82205	6.00696	0	0	0	0
+	chr6	30796601	AACGGTCCGAGAACCGGGCAGGG	GAACGGTCCGAGAACCGGGCA	regulatory-gDNA sequences	DHS_48	-	-	0	0	0	0	0	0	0	0	2.64249	1.25247	5.82205	6.00696	0	0	0	0
+	chr6	30796634	GGAAACGGTCGCAGACAAAGCGG	GGAAACGGTCGCAGACAAAG	regulatory-gDNA sequences	DHS_48	-	-	0	0	0	0	0	0	0	0	2.64249	1.25247	5.82205	6.00696	0	0	0	0
+	chr6	30796635	GAAACGGTCGCAGACAAAGCGGG	GAAACGGTCGCAGACAAAGC	regulatory-gDNA sequences	DHS_48	-	-	0	2	0	0	0	0	0	8	5.0887	1.25247	5.82205	16.3952	0	0	0	0
+	chr6	30796636	AAACGGTCGCAGACAAAGCGGGG	GAAACGGTCGCAGACAAAGCG	regulatory-gDNA sequences	DHS_48	-	-	0	27	0	0	0	125	0	0	34.4129	1.25247	115.445	6.00696	0	0	0	0
+	chr6	30796641	GTCGCAGACAAAGCGGGGCGAGG	GTCGCAGACAAAGCGGGGCG	regulatory-gDNA sequences	DHS_48	-	-	35	152	46	74	248	402	293	500	162.485	77.5735	316.779	545.432	0.215405	0.592986	0.78288	0.537189
-	chr6	30796669	CCCATGTGCATCCCGCCCAACCC	GCCCATGTGCATCCCGCCCAA	ineffective-gDNA	DHS_48	-	-	2	29	0	0	40	256	251	156	36.6818	1.25247	211.553	192.996	0.0545229	0	0.189078	1.30054
-	chr6	30796670	CCATGTGCATCCCGCCCAACCCC	GCCATGTGCATCCCGCCCAAC	ineffective-gDNA	DHS_48	-	-	0	0	0	0	0	0	0	0	2.64249	1.25247	5.82205	6.00696	0	0	0	0
+	chr6	30796677	CATCCCGCCCAACCCCCCTGCGG	GCATCCCGCCCAACCCCCCTG	regulatory-gDNA sequences	DHS_48	-	-	85	52	45	93	47	194	124	100	61.3246	94.3125	167.048	129.539	1.38607	0.477137	0.281356	0.95724
+	chr6	30796678	ATCCCGCCCAACCCCCCTGCGGG	GATCCCGCCCAACCCCCCTGC	regulatory-gDNA sequences	DHS_48	-	-	192	99	108	210	111	527	274	23	107.98	191.768	415.057	35.6247	1.7781	0.563181	0.267433	7.6913
+	chr6	30796679	TCCCGCCCAACCCCCCTGCGGGG	GTCCCGCCCAACCCCCCTGCG	regulatory-gDNA sequences	DHS_48	-	-	8	42	77	163	0	0	215	47	50.9045	152.575	5.82205	65.7671	0.157157	0.50467	0	3.26911
-	chr6	30796680	CCCGCCCAACCCCCCTGCGGGGT	GCCCGCCCAACCCCCCTGCGG	ineffective-gDNA	DHS_48	-	-	22	134	219	418	122	322	393	213	143.74	379.055	258.582	253.536	0.153054	0.577752	0.471803	1.55007
-	chr6	30796681	CCGCCCAACCCCCCTGCGGGGTA	GCCGCCCAACCCCCCTGCGGG	ineffective-gDNA	DHS_48	-	-	0	0	0	0	0	0	0	0	2.64249	1.25247	5.82205	6.00696	0	0	0	0
-	chr6	30796684	CCCAACCCCCCTGCGGGGTACTT	GCCCAACCCCCCTGCGGGGTA	ineffective-gDNA	DHS_48	-	-	0	0	0	0	0	0	0	0	2.64249	1.25247	5.82205	6.00696	0	0	0	0
-	chr6	30796685	CCAACCCCCCTGCGGGGTACTTA	GCCAACCCCCCTGCGGGGTAC	ineffective-gDNA	DHS_48	-	-	314	679	301	711	756	880	1189	717	665.088	595.056	718.117	798.406	0.472118	0.505835	1.05275	1.48922
+	chr6	30796687	AACCCCCCTGCGGGGTACTTAGG	GAACCCCCCTGCGGGGTACTT	regulatory-gDNA sequences	DHS_48	-	-	118	215	313	417	1057	372	519	309	227.874	378.263	294.683	347.778	0.51783	0.827466	3.58691	1.49233
+	chr6	30796688	ACCCCCCTGCGGGGTACTTAGGG	GACCCCCCTGCGGGGTACTTA	regulatory-gDNA sequences	DHS_48	-	-	0	0	0	0	0	0	0	0	2.64249	1.25247	5.82205	6.00696	0	0	0	0
-	chr6	30796689	CCCCCCTGCGGGGTACTTAGGGC	GCCCCCCTGCGGGGTACTTAG	ineffective-gDNA	DHS_48	-	-	0	0	0	0	0	0	0	0	2.64249	1.25247	5.82205	6.00696	0	0	0	0
-	chr6	30796690	CCCCCTGCGGGGTACTTAGGGCC	GCCCCCTGCGGGGTACTTAGG	ineffective-gDNA	DHS_48	-	-	0	0	0	0	0	0	0	0	2.64249	1.25247	5.82205	6.00696	0	0	0	0
-	chr6	30796691	CCCCTGCGGGGTACTTAGGGCCA	GCCCCTGCGGGGTACTTAGGG	ineffective-gDNA	DHS_48	-	-	0	0	0	0	0	0	0	0	2.64249	1.25247	5.82205	6.00696	0	0	0	0
-	chr6	30796692	CCCTGCGGGGTACTTAGGGCCAA	GCCCTGCGGGGTACTTAGGGC	ineffective-gDNA	DHS_48	-	-	0	0	0	0	0	0	0	0	2.64249	1.25247	5.82205	6.00696	0	0	0	0
-	chr6	30796693	CCTGCGGGGTACTTAGGGCCAAA	GCCTGCGGGGTACTTAGGGCC	ineffective-gDNA	DHS_48	-	-	181	346	245	352	417	545	966	538	351.263	324.145	430.068	588.957	0.515283	0.755835	0.969614	1.64019
+	chr6	30796697	CGGGGTACTTAGGGCCAAACCGG	GCGGGGTACTTAGGGCCAAAC	regulatory-gDNA sequences	DHS_48	-	-	0	0	0	0	0	0	0	0	2.64249	1.25247	5.82205	6.00696	0	0	0	0
+	chr6	30796702	TACTTAGGGCCAAACCGGAGCGG	GTACTTAGGGCCAAACCGGAG	regulatory-gDNA sequences	DHS_48	-	-	0	0	0	0	0	0	0	0	2.64249	1.25247	5.82205	6.00696	0	0	0	0
+	chr6	30796703	ACTTAGGGCCAAACCGGAGCGGG	GACTTAGGGCCAAACCGGAGC	regulatory-gDNA sequences	DHS_48	-	-	0	0	0	0	0	0	0	0	2.64249	1.25247	5.82205	6.00696	0	0	0	0
+	chr6	30796707	AGGGCCAAACCGGAGCGGGAAGG	GAGGGCCAAACCGGAGCGGGA	regulatory-gDNA sequences	DHS_48	-	-	0	0	0	0	0	0	0	0	2.64249	1.25247	5.82205	6.00696	0	0	0	0
+	chr6	30796708	GGGCCAAACCGGAGCGGGAAGGG	GGGCCAAACCGGAGCGGGAA	regulatory-gDNA sequences	DHS_48	-	-	0	0	0	0	0	36	0	0	2.64249	1.25247	39.8959	6.00696	0	0	0	0
+	chr6	30796709	GGCCAAACCGGAGCGGGAAGGGG	GGCCAAACCGGAGCGGGAAG	regulatory-gDNA sequences	DHS_48	-	-	0	0	0	0	0	0	0	0	2.64249	1.25247	5.82205	6.00696	0	0	0	0
-	chr6	30796711	CCAAACCGGAGCGGGAAGGGGTG	GCCAAACCGGAGCGGGAAGGG	ineffective-gDNA	DHS_48	-	-	156	282	302	307	1009	581	473	381	292.855	282.975	460.278	417.791	0.532687	1.06723	2.19215	1.13215
+	chr6	30796714	AACCGGAGCGGGAAGGGGTGAGG	GAACCGGAGCGGGAAGGGGTG	regulatory-gDNA sequences	DHS_48	-	-	238	517	154	493	819	801	1047	680	504.366	435.906	649.135	754.631	0.471879	0.353287	1.26168	1.38743
-	chr6	30796716	CCGGAGCGGGAAGGGGTGAGGCC	GCCGGAGCGGGAAGGGGTGAG	ineffective-gDNA	DHS_48	-	-	13	53	2	5	193	115	97	69	62.347	7.21734	107.58	92.7175	0.208511	0.277111	1.79401	1.04619
+	chr6	30796721	GCGGGAAGGGGTGAGGCCATCGG	GCGGGAAGGGGTGAGGCCAT	regulatory-gDNA sequences	DHS_48	-	-	0	0	0	0	0	0	0	0	2.64249	1.25247	5.82205	6.00696	0	0	0	0
+	chr6	30796722	CGGGAAGGGGTGAGGCCATCGGG	GCGGGAAGGGGTGAGGCCATC	regulatory-gDNA sequences	DHS_48	-	-	0	0	0	0	0	0	0	0	2.64249	1.25247	5.82205	6.00696	0	0	0	0
+	chr6	30796725	GAAGGGGTGAGGCCATCGGGCGG	GAAGGGGTGAGGCCATCGGG	regulatory-gDNA sequences	DHS_48	-	-	0	0	0	0	0	0	0	0	2.64249	1.25247	5.82205	6.00696	0	0	0	0
+	chr6	30796748	CTGCAGAGAGCTCCAGCGCAAGG	GCTGCAGAGAGCTCCAGCGCA	regulatory-gDNA sequences	DHS_48	-	-	20	6	0	0	0	0	0	0	9.92841	1.25247	5.82205	6.00696	2.01442	0	0	0
+	chr6	30796749	TGCAGAGAGCTCCAGCGCAAGGG	GTGCAGAGAGCTCCAGCGCAA	regulatory-gDNA sequences	DHS_48	-	-	3	5	0	0	0	0	0	0	8.72483	1.25247	5.82205	6.00696	0.343846	0	0	0
+	chr6	30796752	AGAGAGCTCCAGCGCAAGGGTGG	GAGAGAGCTCCAGCGCAAGGG	regulatory-gDNA sequences	DHS_48	-	-	19	1	0	6	0	34	0	0	3.86787	8.39278	38.0549	6.00696	4.91226	0	0	0
+	chr6	30796753	GAGAGCTCCAGCGCAAGGGTGGG	GAGAGCTCCAGCGCAAGGGT	regulatory-gDNA sequences	DHS_48	-	-	0	4	0	0	0	1	0	0	7.51709	1.25247	6.79725	6.00696	0	0	0	0
+	chr6	30796754	AGAGCTCCAGCGCAAGGGTGGGG	GAGAGCTCCAGCGCAAGGGTG	regulatory-gDNA sequences	DHS_48	-	-	255	337	85	194	346	272	342	428	343.168	178.214	222.944	465.742	0.743077	0.476954	1.55196	0.734312
+	chr6	30796755	GAGCTCCAGCGCAAGGGTGGGGG	GAGCTCCAGCGCAAGGGTGG	regulatory-gDNA sequences	DHS_48	-	-	25	44	175	410	249	356	667	236	53.0199	372.689	283.049	276.725	0.471521	0.469561	0.879707	2.41033
+	chr6	30796756	AGCTCCAGCGCAAGGGTGGGGGG	GAGCTCCAGCGCAAGGGTGGG	regulatory-gDNA sequences	DHS_48	-	-	72	91	140	284	162	214	254	504	100.009	260.514	181.501	549.995	0.719932	0.537399	0.892555	0.461823
-	chr6	30796760	CCAGCGCAAGGGTGGGGGGCGAT	GCCAGCGCAAGGGTGGGGGGC	ineffective-gDNA	DHS_48	-	-	648	1027	776	1297	1473	1956	1510	1477	1098.55	1186.99	1611.1	1682.36	0.58987	0.653754	0.914281	0.897548
+	chr6	30796768	AGGGTGGGGGGCGATGCGCCAGG	GAGGGTGGGGGGCGATGCGCC	regulatory-gDNA sequences	DHS_48	-	-	62	140	53	92	191	101	240	145	149.972	93.4469	96.3398	180.816	0.41341	0.567167	1.98257	1.32731
+	chr6	30797144	GGCTGCTACGTTGTAGCAGAAGG	GGCTGCTACGTTGTAGCAGA	regulatory-gDNA sequences	CTCF_19	DHS_49	-	0	0	0	0	0	0	0	0	2.64249	1.25247	5.82205	6.00696	0	0	0	0
+	chr6	30797145	GCTGCTACGTTGTAGCAGAAGGG	GCTGCTACGTTGTAGCAGAA	regulatory-gDNA sequences	CTCF_19	DHS_49	-	0	0	0	0	0	0	0	0	2.64249	1.25247	5.82205	6.00696	0	0	0	0
+	chr6	30797148	GCTACGTTGTAGCAGAAGGGCGG	GCTACGTTGTAGCAGAAGGG	regulatory-gDNA sequences	CTCF_19	DHS_49	-	0	0	0	0	0	0	0	0	2.64249	1.25247	5.82205	6.00696	0	0	0	0
+	chr6	30797149	CTACGTTGTAGCAGAAGGGCGGG	GCTACGTTGTAGCAGAAGGGC	regulatory-gDNA sequences	CTCF_19	DHS_49	-	18	25	0	0	0	38	69	46	32.1338	1.25247	41.7312	64.5256	0.560158	0	0	1.06934
+	chr6	30797150	TACGTTGTAGCAGAAGGGCGGGG	GTACGTTGTAGCAGAAGGGCG	regulatory-gDNA sequences	CTCF_19	DHS_49	-	358	188	0	0	44	36	59	57	200.079	1.25247	39.8959	78.105	1.7893	0	1.10287	0.755393
+	chr6	30797158	AGCAGAAGGGCGGGGCCCTGCGG	GAGCAGAAGGGCGGGGCCCTG	regulatory-gDNA sequences	CTCF_19	DHS_49	-	8	11	0	0	86	34	6	63	15.8872	1.25247	38.0549	85.4372	0.50355	0	2.25989	0.070227
+	chr6	30797187	GCCGGGGCGCCGTGGGCGCGCGG	GCCGGGGCGCCGTGGGCGCG	regulatory-gDNA sequences	CTCF_19	DHS_49	-	0	0	0	0	0	0	0	0	2.64249	1.25247	5.82205	6.00696	0	0	0	0
-	chr6	30797196	CCGTGGGCGCGCGGGGACAATGC	GCCGTGGGCGCGCGGGGACAA	ineffective-gDNA	CTCF_19	DHS_49	-	0	0	0	0	0	0	0	0	2.64249	1.25247	5.82205	6.00696	0	0	0	0
+	chr6	30797198	GTGGGCGCGCGGGGACAATGCGG	GTGGGCGCGCGGGGACAATG	regulatory-gDNA sequences	CTCF_19	DHS_49	-	57	72	56	55	23	283	351	32	81.3232	59.9938	230.771	47.0146	0.700907	0.93343	0.099666	7.46577
+	chr6	30797211	GACAATGCGGCGTTGCCCGCCGG	GACAATGCGGCGTTGCCCGC	regulatory-gDNA sequences	CTCF_19	DHS_49	-	8	36	0	0	44	115	106	110	44.4487	1.25247	107.58	141.147	0.179983	0	0.408997	0.750992
+	chr6	30797215	ATGCGGCGTTGCCCGCCGGCAGG	GATGCGGCGTTGCCCGCCGGC	regulatory-gDNA sequences	CTCF_19	DHS_49	-	0	0	0	0	0	0	0	0	2.64249	1.25247	5.82205	6.00696	0	0	0	0
+	chr6	30797216	TGCGGCGTTGCCCGCCGGCAGGG	GTGCGGCGTTGCCCGCCGGCA	regulatory-gDNA sequences	CTCF_19	DHS_49	-	83	215	89	95	166	272	96	125	227.874	96.0391	222.944	158.325	0.364236	0.926706	0.744582	0.606347
+	chr6	30797217	GCGGCGTTGCCCGCCGGCAGGGG	GCGGCGTTGCCCGCCGGCAG	regulatory-gDNA sequences	CTCF_19	DHS_49	-	0	0	0	0	0	0	0	0	2.64249	1.25247	5.82205	6.00696	0	0	0	0
-	chr6	30797226	CCCGCCGGCAGGGGCGCGCTACC	GCCCGCCGGCAGGGGCGCGCT	ineffective-gDNA	CTCF_19	DHS_49	-	0	0	0	0	0	0	0	0	2.64249	1.25247	5.82205	6.00696	0	0	0	0
-	chr6	30797227	CCGCCGGCAGGGGCGCGCTACCT	GCCGCCGGCAGGGGCGCGCTA	ineffective-gDNA	CTCF_19	DHS_49	-	0	0	0	0	0	0	0	0	2.64249	1.25247	5.82205	6.00696	0	0	0	0
-	chr6	30797230	CCGGCAGGGGCGCGCTACCTTGG	GCCGGCAGGGGCGCGCTACCT	ineffective-gDNA	CTCF_19	DHS_49	-	2	76	0	0	33	80	92	75	85.2537	1.25247	78.9067	99.9467	0.0234594	0	0.418215	0.92049
+	chr6	30797231	CGGCAGGGGCGCGCTACCTTGGG	GCGGCAGGGGCGCGCTACCTT	regulatory-gDNA sequences	CTCF_19	DHS_49	-	0	0	0	0	0	0	0	0	2.64249	1.25247	5.82205	6.00696	0	0	0	0
-	chr6	30797254	CCCCGCCCCTCGCGCGCGGAATT	GCCCCGCCCCTCGCGCGCGGA	ineffective-gDNA	CTCF_19	DHS_49	-	67	136	81	299	158	380	345	393	145.815	275.279	300.536	429.79	0.459486	0.294247	0.525727	0.802718
-	chr6	30797255	CCCGCCCCTCGCGCGCGGAATTT	GCCCGCCCCTCGCGCGCGGAA	ineffective-gDNA	CTCF_19	DHS_49	-	0	0	0	0	0	0	0	0	2.64249	1.25247	5.82205	6.00696	0	0	0	0
-	chr6	30797256	CCGCCCCTCGCGCGCGGAATTTT	GCCGCCCCTCGCGCGCGGAAT	ineffective-gDNA	CTCF_19	DHS_49	-	0	0	0	0	0	0	0	0	2.64249	1.25247	5.82205	6.00696	0	0	0	0
-	chr6	30797259	CCCCTCGCGCGCGGAATTTTTGT	GCCCCTCGCGCGCGGAATTTT	ineffective-gDNA	CTCF_19	DHS_49	-	94	198	57	135	312	439	158	165	210.441	129.614	344.681	202.866	0.446681	0.439767	0.905185	0.778841
-	chr6	30797260	CCCTCGCGCGCGGAATTTTTGTC	GCCCTCGCGCGCGGAATTTTT	ineffective-gDNA	CTCF_19	DHS_49	-	0	0	0	0	0	0	0	0	2.64249	1.25247	5.82205	6.00696	0	0	0	0
-	chr6	30797261	CCTCGCGCGCGGAATTTTTGTCC	GCCTCGCGCGCGGAATTTTTG	ineffective-gDNA	CTCF_19	DHS_49	-	0	3	0	0	51	37	0	31	6.30508	1.25247	40.8142	45.7543	0	0	1.24956	0
+	chr6	30797265	GCGCGCGGAATTTTTGTCCCTGG	GCGCGCGGAATTTTTGTCCC	regulatory-gDNA sequences	CTCF_19	DHS_49	-	487	835	236	491	1197	1130	1545	1478	853.794	434.443	936.977	1683.43	0.570395	0.543225	1.27751	0.917769
-	chr6	30797282	CCCTGGCCCCGCCCACGCGCGAA	GCCCTGGCCCCGCCCACGCGC	ineffective-gDNA	CTCF_19	DHS_49	-	222	359	476	834	600	615	604	682	362.909	701.703	489.024	756.992	0.611724	0.67835	1.22693	0.797895
-	chr6	30797288	CCCCGCCCACGCGCGAAGTCTTT	GCCCCGCCCACGCGCGAAGTC	ineffective-gDNA	CTCF_19	DHS_49	-	12	5	0	0	0	25	12	40	8.72483	1.25247	29.699	57.0508	1.37538	0	0	0.210339
-	chr6	30798466	CCATTTCTGGGCACGCCTTATCC	GCCATTTCTGGGCACGCCTTA	ineffective-gDNA	CTCF_20	DHS_50	-	129	243	127	278	380	537	288	493	255.837	254.484	423.389	537.459	0.504228	0.499049	0.897521	0.535855
+	chr6	30798473	TGGGCACGCCTTATCCCCTTTGG	GTGGGCACGCCTTATCCCCTT	regulatory-gDNA sequences	CTCF_20	DHS_50	-	13	9	3	16	0	42	0	18	13.5151	19.8428	45.3853	29.2498	0.961885	0.151189	0	0
+	chr6	30798474	GGGCACGCCTTATCCCCTTTGGG	GGGCACGCCTTATCCCCTTT	regulatory-gDNA sequences	CTCF_20	DHS_50	-	7	2	8	10	0	0	0	0	5.0887	13.0382	5.82205	6.00696	1.3756	0.613581	0	0
-	chr6	30798481	CCTTATCCCCTTTGGGTGAATCT	GCCTTATCCCCTTTGGGTGAA	ineffective-gDNA	CTCF_20	DHS_50	-	0	0	0	0	0	0	0	0	2.64249	1.25247	5.82205	6.00696	0	0	0	0
-	chr6	30798487	CCCCTTTGGGTGAATCTGTCATT	GCCCCTTTGGGTGAATCTGTC	ineffective-gDNA	CTCF_20	DHS_50	-	0	0	0	0	0	0	0	0	2.64249	1.25247	5.82205	6.00696	0	0	0	0
+	chr6	30798513	TCCCTTTCGTGAACCACCGTCGG	GTCCCTTTCGTGAACCACCGT	regulatory-gDNA sequences	CTCF_20	DHS_50	-	16	7	0	0	0	44	50	0	11.1279	1.25247	47.2043	6.00696	1.43782	0	0	8.32368
-	chr6	30798514	CCCTTTCGTGAACCACCGTCGGG	GCCCTTTCGTGAACCACCGTC	ineffective-gDNA	CTCF_20	DHS_50	-	0	0	0	0	0	0	0	0	2.64249	1.25247	5.82205	6.00696	0	0	0	0
-	chr6	30798515	CCTTTCGTGAACCACCGTCGGGG	GCCTTTCGTGAACCACCGTCG	ineffective-gDNA	CTCF_20	DHS_50	-	30	19	0	15	74	44	66	0	25.2399	18.7219	47.2043	6.00696	1.18859	0	1.56766	10.9873
-	chr6	30798526	CCACCGTCGGGGCCAAAGACGTC	GCCACCGTCGGGGCCAAAGAC	ineffective-gDNA	CTCF_20	DHS_50	-	0	0	0	0	0	0	0	0	2.64249	1.25247	5.82205	6.00696	0	0	0	0
-	chr6	30798529	CCGTCGGGGCCAAAGACGTCTGC	GCCGTCGGGGCCAAAGACGTC	ineffective-gDNA	CTCF_20	DHS_50	-	135	325	207	289	1299	486	240	363	332.323	265.485	381.468	400.031	0.406231	0.779704	3.40527	0.599953
-	chr6	30798538	CCAAAGACGTCTGCTGCCACCTG	GCCAAAGACGTCTGCTGCCAC	ineffective-gDNA	CTCF_20	DHS_50	-	3100	4047	2370	4172	5999	7381	8248	8422	4861.67	4136.2	5879.51	9059.96	0.637641	0.572989	1.02032	0.910379
+	chr6	30798539	CAAAGACGTCTGCTGCCACCTGG	GCAAAGACGTCTGCTGCCACC	regulatory-gDNA sequences	CTCF_20	DHS_50	-	5873	6131	5089	7993	11075	14180	14835	12765	7368.04	7862.12	11187.2	13664.2	0.797092	0.647281	0.989973	1.08568
-	chr6	30798554	CCACCTGGTGGCGGGACCTGGAA	GCCACCTGGTGGCGGGACCTG	ineffective-gDNA	CTCF_20	DHS_50	-	0	0	0	0	0	0	0	0	2.64249	1.25247	5.82205	6.00696	0	0	0	0
-	chr6	30798557	CCTGGTGGCGGGACCTGGAATGA	GCCTGGTGGCGGGACCTGGAA	ineffective-gDNA	CTCF_20	DHS_50	-	0	0	0	0	0	0	0	0	2.64249	1.25247	5.82205	6.00696	0	0	0	0
-	chr6	30798570	CCTGGAATGACAAGTCTCTGATC	GCCTGGAATGACAAGTCTCTG	ineffective-gDNA	CTCF_20	DHS_50	-	0	0	0	0	0	0	0	0	2.64249	1.25247	5.82205	6.00696	0	0	0	0
-	chr6	30798603	CCCATTTCCAGTATATCTATAAA	GCCCATTTCCAGTATATCTAT	ineffective-gDNA	CTCF_20	DHS_50	-	0	0	0	0	0	0	0	0	2.64249	1.25247	5.82205	6.00696	0	0	0	0
+	chr6	30801042	TGCTTCCCCCCTCACACACTTGG	GTGCTTCCCCCCTCACACACT	regulatory-gDNA sequences	DHS_51	-	-	11	3	8	37	158	0	0	0	6.30508	42.2571	5.82205	6.00696	1.74463	0.189317	27.1382	0
+	chr6	30801814	AGACCAGCATCCACATCCTCTGG	GAGACCAGCATCCACATCCTC	regulatory-gDNA sequences	DHS_52	-	-	0	0	0	0	0	0	0	0	2.64249	1.25247	5.82205	6.00696	0	0	0	0
-	chr6	30801824	CCACATCCTCTGGGAACTTGCAG	GCCACATCCTCTGGGAACTTG	ineffective-gDNA	DHS_52	-	-	97	145	200	380	85	210	463	211	155.179	348.142	178.62	251.491	0.625084	0.574478	0.47587	1.84102
-	chr6	30801873	CCAGATGTACTGAACCATAAATG	GCCAGATGTACTGAACCATAA	ineffective-gDNA	DHS_52	-	-	0	0	0	0	0	0	0	0	2.64249	1.25247	5.82205	6.00696	0	0	0	0
+	chr6	30801874	CAGATGTACTGAACCATAAATGG	GCAGATGTACTGAACCATAAA	regulatory-gDNA sequences	DHS_52	-	-	0	0	0	0	0	0	0	0	2.64249	1.25247	5.82205	6.00696	0	0	0	0
-	chr6	30801887	CCATAAATGGTTGAACTGGCCTT	GCCATAAATGGTTGAACTGGC	ineffective-gDNA	DHS_52	-	-	85	167	250	286	523	600	262	259	178.169	262.509	476.318	299.417	0.477075	0.952349	1.09801	0.875033
+	chr6	30801889	ATAAATGGTTGAACTGGCCTTGG	GATAAATGGTTGAACTGGCCT	regulatory-gDNA sequences	DHS_52	-	-	0	5	0	0	0	0	63	103	8.72483	1.25247	5.82205	133.035	0	0	0	0.473561
-	chr6	30801920	CCCAGGATTCCTTTGGGTTATGT	GCCCAGGATTCCTTTGGGTTA	ineffective-gDNA	DHS_52	-	-	0	0	0	0	0	0	0	0	2.64249	1.25247	5.82205	6.00696	0	0	0	0
-	chr6	30801921	CCAGGATTCCTTTGGGTTATGTG	GCCAGGATTCCTTTGGGTTAT	ineffective-gDNA	DHS_52	-	-	0	0	0	0	0	0	0	0	2.64249	1.25247	5.82205	6.00696	0	0	0	0
-	chr6	30801970	CATAGGTTGACTAAGCCCAC	GCATAGGTTGACTAAGCCCAC	control-gDNA sequences	-	-	-	11	32	0	0	39	0	42	43	40.0439	1.25247	5.82205	60.7937	0.274699	0	6.69868	0.690862
+	chr6	30802653	TAGGCGGGATTGCTACCTTA	GTAGGCGGGATTGCTACCTTA	control-gDNA sequences	-	-	-	0	0	0	0	0	0	0	0	2.64249	1.25247	5.82205	6.00696	0	0	0	0
+	chr6	30806164	GCCCACATGACCTCCAGACCTGG	GCCCACATGACCTCCAGACC	regulatory-gDNA sequences	DHS_53	-	-	4	24	19	120	0	26	67	27	30.991	117.196	30.6334	40.7001	0.12907	0.162122	0	1.64619
+	chr6	30806165	CCCACATGACCTCCAGACCTGGG	GCCCACATGACCTCCAGACCT	regulatory-gDNA sequences	DHS_53	-	-	0	0	0	0	0	0	0	0	2.64249	1.25247	5.82205	6.00696	0	0	0	0
+	chr6	30806166	CCACATGACCTCCAGACCTGGGG	GCCACATGACCTCCAGACCTG	regulatory-gDNA sequences	DHS_53	-	-	4	4	8	21	62	153	46	0	7.51709	25.37	136.854	6.00696	0.532121	0.315333	0.453038	7.65779
-	chr6	30806177	CCAGACCTGGGGCAGCTTCTCTA	GCCAGACCTGGGGCAGCTTCT	ineffective-gDNA	DHS_53	-	-	0	0	0	0	0	0	0	0	2.64249	1.25247	5.82205	6.00696	0	0	0	0
-	chr6	30806182	CCTGGGGCAGCTTCTCTAGCAGC	GCCTGGGGCAGCTTCTCTAGC	ineffective-gDNA	DHS_53	-	-	0	0	0	0	0	0	0	0	2.64249	1.25247	5.82205	6.00696	0	0	0	0
+	chr6	30806206	TGTCCAGCTGAGCAGCCTCTTGG	GTGTCCAGCTGAGCAGCCTCT	regulatory-gDNA sequences	DHS_53	-	-	10	31	29	54	57	229	139	47	38.929	59.0388	192.271	65.7671	0.256878	0.491202	0.296457	2.11352
-	chr6	30806209	CCAGCTGAGCAGCCTCTTGGTAC	GCCAGCTGAGCAGCCTCTTGG	ineffective-gDNA	DHS_53	-	-	209	395	505	615	506	783	914	866	394.955	523.332	633.476	976.1	0.529174	0.96497	0.798767	0.936379
+	chr6	30806215	GAGCAGCCTCTTGGTACAGCTGG	GAGCAGCCTCTTGGTACAGC	regulatory-gDNA sequences	DHS_53	-	-	228	46	0	1	0	187	352	34	55.1187	2.4568	161.959	49.5313	4.13653	0	0	7.10662
+	chr6	30806219	AGCCTCTTGGTACAGCTGGAAGG	GAGCCTCTTGGTACAGCTGGA	regulatory-gDNA sequences	DHS_53	-	-	0	0	0	0	0	0	0	0	2.64249	1.25247	5.82205	6.00696	0	0	0	0
-	chr6	30806221	CCTCTTGGTACAGCTGGAAGGCT	GCCTCTTGGTACAGCTGGAAG	ineffective-gDNA	DHS_53	-	-	59	170	119	287	138	422	428	181	181.306	263.503	331.76	220.154	0.325417	0.451608	0.415963	1.94409
+	chr6	30806234	CTGGAAGGCTTCTGCCTTCTTGG	GCTGGAAGGCTTCTGCCTTCT	regulatory-gDNA sequences	DHS_53	-	-	0	0	0	0	0	0	0	0	2.64249	1.25247	5.82205	6.00696	0	0	0	0
+	chr6	30806257	CCATCTGCTCAGCCTCGGCTCGG	GCCATCTGCTCAGCCTCGGCT	regulatory-gDNA sequences	DHS_53	-	-	1172	1273	945	1630	2423	3198	3039	2196	1411.15	1535.29	2591.09	2447.17	0.830527	0.615519	0.935127	1.24184
+	chr6	30806258	CATCTGCTCAGCCTCGGCTCGGG	GCATCTGCTCAGCCTCGGCTC	regulatory-gDNA sequences	DHS_53	-	-	17	13	128	180	0	71	19	43	18.245	166.563	71.2	60.7937	0.931765	0.768478	0	0.312533
-	chr6	30806269	CCTCGGCTCGGGCTCGGGCCCCT	GCCTCGGCTCGGGCTCGGGCC	ineffective-gDNA	DHS_53	-	-	19	35	0	0	0	19	16	0	43.3555	1.25247	24.0608	6.00696	0.438237	0	0	2.66358
+	chr6	30806273	GGCTCGGGCTCGGGCCCCTATGG	GGCTCGGGCTCGGGCCCCTA	regulatory-gDNA sequences	DHS_53	-	-	15	9	24	33	0	67	60	9	13.5151	38.1429	67.7258	17.6871	1.10987	0.629212	0	3.39231
+	chr6	30806279	GGCTCGGGCCCCTATGGCAAAGG	GGCTCGGGCCCCTATGGCAA	regulatory-gDNA sequences	DHS_53	-	-	0	0	0	0	0	0	0	79	2.64249	1.25247	5.82205	104.738	0	0	0	0
-	chr6	30806288	CCCTATGGCAAAGGCCTCAGCTT	GCCCTATGGCAAAGGCCTCAG	ineffective-gDNA	DHS_53	-	-	0	0	0	0	0	0	0	0	2.64249	1.25247	5.82205	6.00696	0	0	0	0
-	chr6	30806289	CCTATGGCAAAGGCCTCAGCTTC	GCCTATGGCAAAGGCCTCAGC	ineffective-gDNA	DHS_53	-	-	28	58	41	107	0	7	53	43	67.4151	106.284	12.612	60.7937	0.415337	0.385759	0	0.871801
+	chr6	30806304	TCAGCTTCCCCACGCATCTGAGG	GTCAGCTTCCCCACGCATCTG	regulatory-gDNA sequences	DHS_53	-	-	0	27	54	76	23	275	100	78	34.4129	79.3692	225.078	103.543	0	0.680365	0.102187	0.965787
-	chr6	30806314	CCTTAACCCTCAGATGCGTG	GCCTTAACCCTCAGATGCGTG	control-gDNA sequences	-	-	-	8	14	29	30	47	350	216	30	19.4187	35.0118	278.709	44.4927	0.411974	0.828293	0.168635	4.85473
-	chr6	30806424	CCTCTTAACTCACCCGCACAGAC	GCCTCTTAACTCACCCGCACA	ineffective-gDNA	DHS_54	-	-	0	0	0	0	0	0	0	0	2.64249	1.25247	5.82205	6.00696	0	0	0	0
+	chr6	30806428	TTAACTCACCCGCACAGACGCGG	GTTAACTCACCCGCACAGACG	regulatory-gDNA sequences	DHS_54	-	-	128	46	40	54	70	127	135	46	55.1187	59.0388	117.003	64.5256	2.32226	0.67752	0.598278	2.09219
-	chr6	30806436	CCCGCACAGACGCGGCTTCTGCC	GCCCGCACAGACGCGGCTTCT	ineffective-gDNA	DHS_54	-	-	115	277	171	100	195	259	803	447	288.19	100.331	213.69	485.998	0.399042	1.70436	0.912538	1.65227
-	chr6	30806457	CCTCCGCCTGCATAATTAGTTGG	GCCTCCGCCTGCATAATTAGT	ineffective-gDNA	DHS_54	-	-	0	0	0	0	0	0	0	0	2.64249	1.25247	5.82205	6.00696	0	0	0	0
+	chr6	30806458	CTCCGCCTGCATAATTAGTTGGG	GCTCCGCCTGCATAATTAGTT	regulatory-gDNA sequences	DHS_54	-	-	0	0	0	0	0	0	0	0	2.64249	1.25247	5.82205	6.00696	0	0	0	0
-	chr6	30806460	CCGCCTGCATAATTAGTTGGGAC	GCCGCCTGCATAATTAGTTGG	ineffective-gDNA	DHS_54	-	-	33	70	122	164	61	95	10	48	79.3537	153.395	91.4328	67.0075	0.41586	0.795334	0.667157	0.149237
+	chr6	30806466	GCATAATTAGTTGGGACCTGTGG	GCATAATTAGTTGGGACCTG	regulatory-gDNA sequences	DHS_54	-	-	74	137	71	233	189	244	43	234	146.854	211.889	202.996	274.731	0.503903	0.33508	0.931054	0.156517
+	chr6	30806474	AGTTGGGACCTGTGGACAGAAGG	GAGTTGGGACCTGTGGACAGA	regulatory-gDNA sequences	DHS_54	-	-	0	0	0	0	0	0	0	0	2.64249	1.25247	5.82205	6.00696	0	0	0	0
+	chr6	30806481	ACCTGTGGACAGAAGGGAAGTGG	GACCTGTGGACAGAAGGGAAG	regulatory-gDNA sequences	DHS_54	-	-	0	0	0	0	0	0	0	0	2.64249	1.25247	5.82205	6.00696	0	0	0	0
-	chr6	30806482	CCTGTGGACAGAAGGGAAGTGGA	GCCTGTGGACAGAAGGGAAGT	ineffective-gDNA	DHS_54	-	-	0	0	0	0	0	0	0	0	2.64249	1.25247	5.82205	6.00696	0	0	0	0
-	chr6	30806513	CCCAGCAGCCCTTACTCCCAGGA	GCCCAGCAGCCCTTACTCCCA	ineffective-gDNA	DHS_54	-	-	290	349	132	309	456	678	490	535	353.955	284.88	542.772	585.506	0.819313	0.463352	0.840132	0.836883
-	chr6	30806522	CCTTACTCCCAGGAGAAAGGCCC	GCCTTACTCCCAGGAGAAAGG	ineffective-gDNA	DHS_54	-	-	0	0	0	0	0	0	0	0	2.64249	1.25247	5.82205	6.00696	0	0	0	0
-	chr6	30806529	CCCAGGAGAAAGGCCCAGTGCTG	GCCCAGGAGAAAGGCCCAGTG	ineffective-gDNA	DHS_54	-	-	11	19	0	0	0	0	49	77	25.2399	1.25247	5.82205	102.345	0.435817	0	0	0.478771
-	chr6	30806543	CCAGTGCTGCAGAGGCAGACGCT	GCCAGTGCTGCAGAGGCAGAC	ineffective-gDNA	DHS_54	-	-	0	0	0	0	0	0	0	0	2.64249	1.25247	5.82205	6.00696	0	0	0	0
+	chr6	30806565	TCCTGAAACCTGAAATCCATAGG	GTCCTGAAACCTGAAATCCAT	regulatory-gDNA sequences	DHS_54	-	-	0	0	0	0	0	0	0	0	2.64249	1.25247	5.82205	6.00696	0	0	0	0
-	chr6	30806566	CCTGAAACCTGAAATCCATAGGA	GCCTGAAACCTGAAATCCATA	ineffective-gDNA	DHS_54	-	-	0	0	0	0	0	0	0	0	2.64249	1.25247	5.82205	6.00696	0	0	0	0
+	chr6	30806573	CCTGAAATCCATAGGAGTCCAGG	GCCTGAAATCCATAGGAGTCC	regulatory-gDNA sequences	DHS_54	-	-	53	129	65	135	340	294	22	157	138.564	129.614	238.601	194.097	0.382496	0.501489	1.42497	0.113345
+	chr6	30806576	GAAATCCATAGGAGTCCAGGTGG	GAAATCCATAGGAGTCCAGG	regulatory-gDNA sequences	DHS_54	-	-	0	0	0	0	0	0	0	0	2.64249	1.25247	5.82205	6.00696	0	0	0	0
-	chr6	30806581	CCATAGGAGTCCAGGTGGTGAAG	GCCATAGGAGTCCAGGTGGTG	ineffective-gDNA	DHS_54	-	-	8420	7937	9700	11021	14141	17641	16631	14992	9484.26	10668.8	13872.8	16023.1	0.887787	0.90919	1.01933	1.03794
-	chr6	30806681	CCTCGGCTAGGCGCTCCAGCTTG	GCCTCGGCTAGGCGCTCCAGC	ineffective-gDNA	CTCF_21	DHS_55	-	0	0	0	0	0	0	0	0	2.64249	1.25247	5.82205	6.00696	0	0	0	0
-	chr6	30806696	CCAGCTTGTAGCGCTCCGCTTCC	GCCAGCTTGTAGCGCTCCGCT	ineffective-gDNA	CTCF_21	DHS_55	-	23	85	0	6	32	93	196	145	94.0899	8.39278	89.7845	180.816	0.244447	0	0.356409	1.08397
+	chr6	30806701	TTGTAGCGCTCCGCTTCCGCTGG	GTTGTAGCGCTCCGCTTCCGC	regulatory-gDNA sequences	CTCF_21	DHS_55	-	14	27	0	0	136	114	55	71	34.4129	1.25247	106.786	95.1329	0.406824	0	1.27357	0.578139
-	chr6	30806711	CCGCTTCCGCTGGCTTCCGCACC	GCCGCTTCCGCTGGCTTCCGC	ineffective-gDNA	CTCF_21	DHS_55	-	621	1079	1012	1687	1488	2099	2292	2602	1164.72	1594.73	1724.02	2878.91	0.533176	0.63459	0.863098	0.796133
+	chr6	30806714	CTTCCGCTGGCTTCCGCACCCGG	GCTTCCGCTGGCTTCCGCACC	regulatory-gDNA sequences	CTCF_21	DHS_55	-	18	58	2	0	0	159	79	333	67.4151	1.25247	141.343	370.885	0.267003	1.59684	0	0.213004
+	chr6	30806715	TTCCGCTGGCTTCCGCACCCGGG	GTTCCGCTGGCTTCCGCACCC	regulatory-gDNA sequences	CTCF_21	DHS_55	-	157	384	119	244	247	725	551	731	385.185	221.855	583.222	815.018	0.407596	0.536386	0.423509	0.676058
-	chr6	30806717	CCGCTGGCTTCCGCACCCGGGCC	GCCGCTGGCTTCCGCACCCGG	ineffective-gDNA	CTCF_21	DHS_55	-	1950	1227	607	1216	2212	2327	2484	2600	1352.78	1102	1904.01	2876.79	1.44148	0.550818	1.16176	0.863463
-	chr6	30806727	CCGCACCCGGGCCTCCAGCTCCT	GCCGCACCCGGGCCTCCAGCT	ineffective-gDNA	CTCF_21	DHS_55	-	11	24	75	140	0	86	105	179	30.991	133.726	83.9632	218.016	0.354942	0.560849	0	0.481615
-	chr6	30806741	CCAGCTCCTTCTCCCGCCGGGCG	GCCAGCTCCTTCTCCCGCCGG	ineffective-gDNA	CTCF_21	DHS_55	-	221	465	218	449	689	903	789	1324	457.225	403.111	738.258	1514.18	0.48335	0.540794	0.933278	0.521076
-	chr6	30806747	CCTTCTCCCGCCGGGCGATCTCC	GCCTTCTCCCGCCGGGCGATC	ineffective-gDNA	CTCF_21	DHS_55	-	6056	7697	6689	7410	9407	13409	13486	12315	9205.91	7307.29	10587.5	13187.4	0.657839	0.915388	0.888503	1.02264
-	chr6	30806754	CCGCCGGGCGATCTCCTGCTCCT	GCCGCCGGGCGATCTCCTGCT	ineffective-gDNA	CTCF_21	DHS_55	-	18	56	0	2	293	99	122	18	65.3961	3.6564	94.7104	29.2498	0.275246	0	3.09364	4.17097
-	chr6	30806757	CCGGGCGATCTCCTGCTCCTGCA	GCCGGGCGATCTCCTGCTCCT	ineffective-gDNA	CTCF_21	DHS_55	-	303	658	568	934	1187	1223	1527	1186	642.546	805.265	1017.57	1355.91	0.471562	0.705358	1.16651	1.12618
-	chr6	30806813	CCTGCACCCGCTGCTCCTCAATC	GCCTGCACCCGCTGCTCCTCA	ineffective-gDNA	CTCF_21	DHS_55	-	2	8	0	0	193	113	110	55	12.3235	1.25247	105.991	75.6493	0.162292	0	1.8209	1.45408
-	chr6	30806820	CCGCTGCTCCTCAATCTGCTGCT	GCCGCTGCTCCTCAATCTGCT	ineffective-gDNA	CTCF_21	DHS_55	-	5	21	0	0	79	106	149	94	27.5481	1.25247	100.387	122.513	0.181501	0	0.786956	1.2162
-	chr6	30806828	CCTCAATCTGCTGCTTAGTCTTG	GCCTCAATCTGCTGCTTAGTC	ineffective-gDNA	CTCF_21	DHS_55	-	0	5	0	0	27	139	203	123	8.72483	1.25247	126.252	156.05	0	0	0.213858	1.30086
+	chr6	30806829	CTCAATCTGCTGCTTAGTCTTGG	GCTCAATCTGCTGCTTAGTCT	regulatory-gDNA sequences	CTCF_21	DHS_55	-	25	43	32	71	52	184	107	78	51.9644	74.8623	159.772	103.543	0.481099	0.427451	0.325465	1.03339
+	chr6	30806837	GCTGCTTAGTCTTGGCCACCTGG	GCTGCTTAGTCTTGGCCACC	regulatory-gDNA sequences	CTCF_21	DHS_55	-	1528	2164	8677	2652	3757	4140	3481	3551	2534.22	2593.16	3333.25	3887.78	0.602947	3.3461	1.12713	0.895369
+	chr6	30806838	CTGCTTAGTCTTGGCCACCTGGG	GCTGCTTAGTCTTGGCCACCT	regulatory-gDNA sequences	CTCF_21	DHS_55	-	522	913	917	1404	2010	2347	1911	1909	953.307	1299.1	1919.8	2141.93	0.547568	0.705872	1.04698	0.892187
+	chr6	30806842	TTAGTCTTGGCCACCTGGGTAGG	GTTAGTCTTGGCCACCTGGGT	regulatory-gDNA sequences	CTCF_21	DHS_55	-	71	194	13	15	219	201	173	335	206.304	18.7219	172.121	372.816	0.344152	0.694372	1.27236	0.464036
+	chr6	30806845	GTCTTGGCCACCTGGGTAGGAGG	GTCTTGGCCACCTGGGTAGG	regulatory-gDNA sequences	CTCF_21	DHS_55	-	0	7	0	0	0	28	48	73	11.1279	1.25247	32.4976	97.5426	0	0	0	0.492093
+	chr6	30806846	TCTTGGCCACCTGGGTAGGAGGG	GTCTTGGCCACCTGGGTAGGA	regulatory-gDNA sequences	CTCF_21	DHS_55	-	0	0	0	0	0	0	0	19	2.64249	1.25247	5.82205	30.5275	0	0	0	0
-	chr6	30807360	CTCTAGAAGGGGGCACACGT	GCTCTAGAAGGGGGCACACGT	control-gDNA sequences	-	-	-	127	182	97	133	282	280	155	182	193.834	127.966	228.636	221.221	0.655199	0.758012	1.2334	0.700658
-	chr6	30808610	CACCGGTGTAGAGGGCAACG	GCACCGGTGTAGAGGGCAACG	control-gDNA sequences	-	-	-	31	88	27	35	203	242	316	120	97.0446	40.2085	201.568	152.629	0.319441	0.6715	1.00711	2.07038
-	chr6	30810804	ATCAGATGTTTCTCCGTACA	GATCAGATGTTTCTCCGTACA	control-gDNA sequences	-	-	-	0	0	0	0	0	0	0	0	2.64249	1.25247	5.82205	6.00696	0	0	0	0
+	chr6	30814488	TCATAGCCCGCTTGCACTAA	GTCATAGCCCGCTTGCACTAA	control-gDNA sequences	-	-	-	0	0	0	0	0	0	0	0	2.64249	1.25247	5.82205	6.00696	0	0	0	0
-	chr6	30814680	ACACGCACAGTACCCAGGTG	GACACGCACAGTACCCAGGTG	control-gDNA sequences	-	-	-	2047	1888	1143	2001	3560	3957	3551	3061	2187.86	1921.24	3189.15	3366.92	0.935619	0.594929	1.11629	1.05467
+	chr6	30814713	TGAAAGTGCTGCGACTTTAT	GTGAAAGTGCTGCGACTTTAT	control-gDNA sequences	-	-	-	13	77	25	19	60	187	4	181	86.2352	23.1743	161.959	220.154	0.150751	1.07878	0.370464	0.0181691
-	chr6	30815939	GGTCAACACCCGCCGAGCAC	GGTCAACACCCGCCGAGCAC	control-gDNA sequences	-	-	-	14	7	0	0	0	0	0	0	11.1279	1.25247	5.82205	6.00696	1.2581	0	0	0
-	chr6	30815960	GAAGGCCGCCTATGACATCG	GAAGGCCGCCTATGACATCG	control-gDNA sequences	-	-	-	289	182	168	307	254	248	197	357	193.834	282.975	205.85	394.164	1.49096	0.593692	1.23391	0.499792
+	chr6	30817084	TTTACCTGTAGCCAGAGTAG	GTTTACCTGTAGCCAGAGTAG	control-gDNA sequences	-	-	-	0	8	49	47	181	35	2	0	12.3235	52.2586	38.9761	6.00696	0	0.937645	4.64387	0.332947
+	chr6	30817894	GTACTTACCGGAGACCACCA	GTACTTACCGGAGACCACCA	control-gDNA sequences	-	-	-	0	0	0	0	0	0	0	0	2.64249	1.25247	5.82205	6.00696	0	0	0	0
+	chr6	30818081	CTACACCCATGGGTCCGCTA	GCTACACCCATGGGTCCGCTA	control-gDNA sequences	-	-	-	0	0	0	0	0	0	0	78	2.64249	1.25247	5.82205	103.543	0	0	0	0
-	chr6	30818174	TTTATCAAAGGGAGCGGCGA	GTTTATCAAAGGGAGCGGCGA	control-gDNA sequences	-	-	-	0	0	0	0	0	0	0	0	2.64249	1.25247	5.82205	6.00696	0	0	0	0
-	chr6	30818185	CGCGGGGGACCTTTATCAAA	GCGCGGGGGACCTTTATCAAA	control-gDNA sequences	-	-	-	0	0	0	0	0	0	0	0	2.64249	1.25247	5.82205	6.00696	0	0	0	0
-	chr6	30818186	GCGCGGGGGACCTTTATCAA	GCGCGGGGGACCTTTATCAA	control-gDNA sequences	-	-	-	0	0	0	0	0	0	0	0	2.64249	1.25247	5.82205	6.00696	0	0	0	0
+	chr6	30818297	CGGCAGCCCGGCTGGGGTCT	GCGGCAGCCCGGCTGGGGTCT	control-gDNA sequences	-	-	-	565	817	613	961	711	1129	1441	1132	830.814	833.731	936.106	1292.73	0.680056	0.735249	0.759529	1.11469
-	chr6	30818425	TCGCGTCTGCCGCAGCAACG	GTCGCGTCTGCCGCAGCAACG	control-gDNA sequences	-	-	-	2446	2597	4641	3175	4442	6140	8030	4723	3074.88	3128.14	4905.82	5133.15	0.795477	1.48363	0.905455	1.56434
-	chr6	30818427	GGTCGCGTCTGCCGCAGCAA	GGTCGCGTCTGCCGCAGCAA	control-gDNA sequences	-	-	-	13	51	0	0	0	0	200	71	60.299	1.25247	5.82205	95.1329	0.215592	0	0	2.10232
-	chr6	30818448	TTAGTCCGTTGCGGGGGGCG	GTTAGTCCGTTGCGGGGGGCG	control-gDNA sequences	-	-	-	34001	32346	26677	33824	50571	60641	61953	57781	34471.1	28620.7	46637	61387.5	0.986362	0.932088	1.08435	1.00921
-	chr6	30818449	CTTAGTCCGTTGCGGGGGGC	GCTTAGTCCGTTGCGGGGGGC	control-gDNA sequences	-	-	-	10606	10815	13692	12134	16595	21615	19910	20029	12756.9	11670.1	16944.2	21354.6	0.831391	1.17326	0.979392	0.932353
-	chr6	30818450	GCTTAGTCCGTTGCGGGGGG	GCTTAGTCCGTTGCGGGGGG	control-gDNA sequences	-	-	-	1267	1125	1004	1029	1995	2507	1414	1757	1223.21	905.372	2046.07	1980.25	1.0358	1.10894	0.975038	0.714052
-	chr6	30818453	GGTGCTTAGTCCGTTGCGGG	GGTGCTTAGTCCGTTGCGGG	control-gDNA sequences	-	-	-	242	389	70	158	493	902	1152	1082	389.627	148.478	737.382	1233.76	0.621106	0.471451	0.668582	0.933728
-	chr6	30818454	GGGTGCTTAGTCCGTTGCGG	GGGTGCTTAGTCCGTTGCGG	control-gDNA sequences	-	-	-	79	201	128	312	563	492	704	756	213.536	287.724	386.292	844.739	0.369961	0.44487	1.45745	0.833393
-	chr6	30818456	GGGGGTGCTTAGTCCGTTGC	GGGGGTGCTTAGTCCGTTGC	control-gDNA sequences	-	-	-	421	569	538	884	494	882	898	839	553.124	752.517	719.868	943.798	0.761132	0.714934	0.686237	0.951474
-	chr6	30818550	CCGCCCGCTGGCTCTCGGGCCCA	GCCGCCCGCTGGCTCTCGGGC	ineffective-gDNA	DHS_56	Promoter_12	-	3	14	9	12	1	88	0	0	19.4187	15.3278	85.6348	6.00696	0.15449	0.587167	0.0116775	0
-	chr6	30818553	CCCGCTGGCTCTCGGGCCCAGCC	GCCCGCTGGCTCTCGGGCCCA	ineffective-gDNA	DHS_56	Promoter_12	-	77	138	173	193	131	517	300	254	147.893	177.377	406.746	294.519	0.520648	0.975326	0.322069	1.01861
-	chr6	30818554	CCGCTGGCTCTCGGGCCCAGCCG	GCCGCTGGCTCTCGGGCCCAG	ineffective-gDNA	DHS_56	Promoter_12	-	380	577	540	969	766	1194	1476	1217	560.818	842.163	992.532	1391.9	0.677582	0.641206	0.771764	1.06042
+	chr6	30818564	TCGGGCCCAGCCGGGCTGCCTGG	GTCGGGCCCAGCCGGGCTGCC	regulatory-gDNA sequences	DHS_56	Promoter_12	-	1041	1515	3164	1378	1802	2350	2226	2777	1717.6	1271.88	1922.17	3064.99	0.606079	2.48766	0.937483	0.726267
-	chr6	30818569	CCCAGCCGGGCTGCCTGGTTAGC	GCCCAGCCGGGCTGCCTGGTT	ineffective-gDNA	DHS_56	Promoter_12	-	354	639	491	863	697	1091	764	1018	622.674	730.567	902.964	1157.78	0.568516	0.672081	0.771903	0.659886
-	chr6	30818570	CCAGCCGGGCTGCCTGGTTAGCC	GCCAGCCGGGCTGCCTGGTTA	ineffective-gDNA	DHS_56	Promoter_12	-	668	742	575	830	1458	2193	994	1506	736.858	697.851	1798.24	1713.24	0.906552	0.823958	0.810795	0.580187
+	chr6	30818573	GCCGGGCTGCCTGGTTAGCCCGG	GCCGGGCTGCCTGGTTAGCC	regulatory-gDNA sequences	DHS_56	Promoter_12	-	298	361	240	586	369	690	771	458	364.696	502.576	553.073	498.009	0.817119	0.47754	0.667181	1.54816
-	chr6	30818574	CCGGGCTGCCTGGTTAGCCCGGG	GCCGGGCTGCCTGGTTAGCCC	ineffective-gDNA	DHS_56	Promoter_12	-	0	11	0	0	0	0	142	26	15.8872	1.25247	5.82205	39.4333	0	0	0	3.60102
+	chr6	30818575	CGGGCTGCCTGGTTAGCCCGGGG	GCGGGCTGCCTGGTTAGCCCG	regulatory-gDNA sequences	DHS_56	Promoter_12	-	0	0	0	0	0	0	36	27	2.64249	1.25247	5.82205	40.7001	0	0	0	0.884518
+	chr6	30818578	GCTGCCTGGTTAGCCCGGGGAGG	GCTGCCTGGTTAGCCCGGGG	regulatory-gDNA sequences	DHS_56	Promoter_12	-	0	0	0	0	0	0	0	0	2.64249	1.25247	5.82205	6.00696	0	0	0	0
+	chr6	30818579	CTGCCTGGTTAGCCCGGGGAGGG	GCTGCCTGGTTAGCCCGGGGA	regulatory-gDNA sequences	DHS_56	Promoter_12	-	0	12	31	47	0	34	17	62	17.0678	52.2586	38.0549	84.2188	0	0.593204	0	0.201855
-	chr6	30818582	CCTGGTTAGCCCGGGGAGGGCCA	GCCTGGTTAGCCCGGGGAGGG	ineffective-gDNA	DHS_56	Promoter_12	-	46	80	47	62	57	2	205	111	89.1789	66.5898	7.77071	142.3	0.515817	0.705814	7.33524	1.44061
-	chr6	30818591	CCCGGGGAGGGCCACATCCCTGC	GCCCGGGGAGGGCCACATCCC	ineffective-gDNA	DHS_56	Promoter_12	-	0	0	0	0	0	0	0	0	2.64249	1.25247	5.82205	6.00696	0	0	0	0
-	chr6	30818592	CCGGGGAGGGCCACATCCCTGCC	GCCGGGGAGGGCCACATCCCT	ineffective-gDNA	DHS_56	Promoter_12	-	0	0	0	0	0	0	0	0	2.64249	1.25247	5.82205	6.00696	0	0	0	0
-	chr6	30818609	CCTGCCGCCCCAGTCACCGCCCT	GCCTGCCGCCCCAGTCACCGC	ineffective-gDNA	DHS_56	Promoter_12	-	6916	8410	5335	9147	14221	16836	16131	17434	10030.3	8946.42	13249.1	18608.4	0.689509	0.596328	1.07336	0.866865
-	chr6	30818613	CCGCCCCAGTCACCGCCCTTCTT	GCCGCCCCAGTCACCGCCCTT	ineffective-gDNA	DHS_56	Promoter_12	-	3223	4731	4610	5592	6533	9364	7417	7333	5692.15	5545.88	7432.14	7904.45	0.566218	0.831248	0.879019	0.938332
-	chr6	30818616	CCCCAGTCACCGCCCTTCTTGAG	GCCCCAGTCACCGCCCTTCTT	ineffective-gDNA	DHS_56	Promoter_12	-	24	41	21	10	41	145	97	63	49.8403	13.0382	130.819	85.4372	0.481538	1.61065	0.31341	1.13534
-	chr6	30818618	CCAGTCACCGCCCTTCTTGAGCC	GCCAGTCACCGCCCTTCTTGA	ineffective-gDNA	DHS_56	Promoter_12	-	6	13	59	202	0	119	83	0	18.245	184.954	110.741	6.00696	0.328858	0.318999	0	13.8173
+	chr6	30818620	AGTCACCGCCCTTCTTGAGCCGG	GAGTCACCGCCCTTCTTGAGC	regulatory-gDNA sequences	DHS_56	Promoter_12	-	54	66	71	47	89	87	282	193	75.4011	52.2586	84.7999	232.847	0.71617	1.35863	1.04953	1.2111
+	chr6	30818621	GTCACCGCCCTTCTTGAGCCGGG	GTCACCGCCCTTCTTGAGCC	regulatory-gDNA sequences	DHS_56	Promoter_12	-	301	431	92	118	625	655	1124	828	426.906	115.528	523.082	930.646	0.705074	0.796345	1.19484	1.20776
-	chr6	30818625	CCGCCCTTCTTGAGCCGGGAATC	GCCGCCCTTCTTGAGCCGGGA	ineffective-gDNA	DHS_56	Promoter_12	-	61	35	0	0	0	30	0	36	43.3555	1.25247	34.3559	52.0428	1.40697	0	0	0
-	chr6	30818628	CCCTTCTTGAGCCGGGAATCCCG	GCCCTTCTTGAGCCGGGAATC	ineffective-gDNA	DHS_56	Promoter_12	-	102	212	83	158	191	57	359	130	224.818	148.478	58.9018	163.991	0.4537	0.559006	3.24268	2.18914
-	chr6	30818629	CCTTCTTGAGCCGGGAATCCCGC	GCCTTCTTGAGCCGGGAATCC	ineffective-gDNA	DHS_56	Promoter_12	-	1624	1659	758	1434	1728	2933	2420	2522	1899.44	1330.5	2382.14	2793.85	0.854988	0.56971	0.725399	0.866189
-	chr6	30818639	CCGGGAATCCCGCCCACGCCGCG	GCCGGGAATCCCGCCCACGCC	ineffective-gDNA	DHS_56	Promoter_12	-	2899	1755	884	1090	2220	2781	2952	2962	2020.46	969.574	2262.25	3261.67	1.43482	0.91174	0.981324	0.905056
-	chr6	30818647	CCCGCCCACGCCGCGCCACGCTC	GCCCGCCCACGCCGCGCCACG	ineffective-gDNA	DHS_56	Promoter_12	-	258	507	148	272	706	1048	722	872	495.199	248.499	865.36	983.281	0.521003	0.595576	0.815845	0.734277
-	chr6	30818648	CCGCCCACGCCGCGCCACGCTCC	GCCGCCCACGCCGCGCCACGC	ineffective-gDNA	DHS_56	Promoter_12	-	87	188	184	312	366	145	214	311	200.079	287.724	130.819	349.701	0.434829	0.639501	2.79776	0.611951
+	chr6	30818662	CCACGCTCCGCCCCCGGGTGAGG	GCCACGCTCCGCCCCCGGGTG	regulatory-gDNA sequences	DHS_56	Promoter_12	-	763	992	708	830	1272	1562	2397	1678	1053.98	697.851	1299.83	1896.21	0.723922	1.01454	0.978591	1.2641
+	chr6	30818663	CACGCTCCGCCCCCGGGTGAGGG	GCACGCTCCGCCCCCGGGTGA	regulatory-gDNA sequences	DHS_56	Promoter_12	-	642	269	216	414	483	835	618	562	280.689	375.881	678.778	616.644	2.28723	0.57465	0.711573	1.0022
-	chr6	30818669	CCGCCCCCGGGTGAGGGACTTGA	GCCGCCCCCGGGTGAGGGACT	ineffective-gDNA	DHS_56	Promoter_12	-	246	488	278	551	938	1203	1234	766	477.926	477.66	1000.31	856.646	0.514724	0.582004	0.937707	1.4405
-	chr6	30818672	CCCCCGGGTGAGGGACTTGACCT	GCCCCCGGGTGAGGGACTTGA	ineffective-gDNA	DHS_56	Promoter_12	-	0	0	0	0	0	0	0	0	2.64249	1.25247	5.82205	6.00696	0	0	0	0
-	chr6	30818673	CCCCGGGTGAGGGACTTGACCTC	GCCCCGGGTGAGGGACTTGAC	ineffective-gDNA	DHS_56	Promoter_12	-	0	12	0	0	0	76	103	127	17.0678	1.25247	75.5	160.595	0	0	0	0.641365
-	chr6	30818674	CCCGGGTGAGGGACTTGACCTCC	GCCCGGGTGAGGGACTTGACC	ineffective-gDNA	DHS_56	Promoter_12	-	60	84	97	124	0	34	43	67	93.1067	120.522	38.0549	90.2964	0.644422	0.804829	0	0.476209
-	chr6	30818675	CCGGGTGAGGGACTTGACCTCCG	GCCGGGTGAGGGACTTGACCT	ineffective-gDNA	DHS_56	Promoter_12	-	34	43	0	1	98	249	30	30	51.9644	2.4568	206.563	44.4927	0.654294	0	0.474431	0.674267
+	chr6	30818680	TGAGGGACTTGACCTCCGCCTGG	GTGAGGGACTTGACCTCCGCC	regulatory-gDNA sequences	DHS_56	Promoter_12	-	51	91	28	86	23	221	130	206	100.009	88.2219	186.534	246.356	0.509952	0.317382	0.123302	0.527691
+	chr6	30818688	TTGACCTCCGCCTGGCACCCTGG	GTTGACCTCCGCCTGGCACCC	regulatory-gDNA sequences	DHS_56	Promoter_12	-	1319	1197	1527	934	1106	2281	2094	2454	1314.69	805.265	1867.7	2721.54	1.00328	1.89627	0.592171	0.769417
-	chr6	30818692	CCTCCGCCTGGCACCCTGGCGTA	GCCTCCGCCTGGCACCCTGGC	ineffective-gDNA	DHS_56	Promoter_12	-	35	156	132	249	663	561	195	217	166.665	226.471	443.465	257.612	0.210002	0.582856	1.49504	0.756953
+	chr6	30818695	CCGCCTGGCACCCTGGCGTAAGG	GCCGCCTGGCACCCTGGCGTA	regulatory-gDNA sequences	DHS_56	Promoter_12	-	0	0	0	0	0	0	0	0	2.64249	1.25247	5.82205	6.00696	0	0	0	0
+	chr6	30818696	CGCCTGGCACCCTGGCGTAAGGG	GCGCCTGGCACCCTGGCGTAA	regulatory-gDNA sequences	DHS_56	Promoter_12	-	0	31	0	0	64	139	164	117	38.929	1.25247	126.252	149.197	0	0	0.506922	1.09922
-	chr6	30818698	CCTGGCACCCTGGCGTAAGGGTG	GCCTGGCACCCTGGCGTAAGG	ineffective-gDNA	DHS_56	Promoter_12	-	0	0	0	0	0	0	0	0	2.64249	1.25247	5.82205	6.00696	0	0	0	0
-	chr6	30818705	CCCTGGCGTAAGGGTGATTGCCA	GCCCTGGCGTAAGGGTGATTG	ineffective-gDNA	DHS_56	Promoter_12	-	49	102	11	2	0	172	37	52	110.993	3.6564	150.976	71.9546	0.441471	3.00842	0	0.514213
-	chr6	30818706	CCTGGCGTAAGGGTGATTGCCAC	GCCTGGCGTAAGGGTGATTGC	ineffective-gDNA	DHS_56	Promoter_12	-	1193	1701	1359	2417	2964	4221	3540	3879	1952.41	2351.38	3397.02	4236.38	0.61104	0.577957	0.872529	0.83562
-	chr6	30818728	CCCGCGGCGAATCCGAGATG	GCCCGCGGCGAATCCGAGATG	control-gDNA sequences	-	-	-	0	1	0	0	0	0	43	64	3.86787	1.25247	5.82205	86.6542	0	0	0	0.496225
+	chr6	30818738	TCGCCGCGGGGCAACTACCT	GTCGCCGCGGGGCAACTACCT	control-gDNA sequences	-	-	-	0	0	0	0	0	0	0	0	2.64249	1.25247	5.82205	6.00696	0	0	0	0
-	chr6	30819391	ATGTACGTCCTCCTAGGTGA	GATGTACGTCCTCCTAGGTGA	control-gDNA sequences	-	-	-	0	15	0	0	0	0	64	0	20.5891	1.25247	5.82205	6.00696	0	0	0	10.6543
-	chr6	30819540	CGCCACCCGGTGCTTGAGGC	GCGCCACCCGGTGCTTGAGGC	control-gDNA sequences	-	-	-	21	64	243	560	251	188	89	162	73.4161	484.068	162.687	199.585	0.286041	0.501996	1.54284	0.445925
-	chr6	30819604	CGCGAGAGCGTATCCCCAAC	GCGCGAGAGCGTATCCCCAAC	control-gDNA sequences	-	-	-	0	0	0	0	0	0	0	0	2.64249	1.25247	5.82205	6.00696	0	0	0	0
+	chr6	30819617	TCTCGCGCACCAGGTACGCC	GTCTCGCGCACCAGGTACGCC	control-gDNA sequences	-	-	-	499	472	1591	847	515	684	576	892	463.505	714.433	547.92	1007.22	1.07658	2.22694	0.939918	0.571872
+	chr6	30819763	ATTAAAGGGCTCGAGGACGG	GATTAAAGGGCTCGAGGACGG	control-gDNA sequences	-	-	-	4	28	0	0	73	72	66	115	35.5494	1.25247	72.0638	146.903	0.11252	0	1.01299	0.449275
-	chr6	30820023	ATTCGCGGGGTGCGCTGCCC	GATTCGCGGGGTGCGCTGCCC	control-gDNA sequences	-	-	-	3216	4060	3194	4694	8249	9874	9548	8624	4877.53	4657.93	7830.83	9274.25	0.65935	0.685712	1.0534	1.02952
-	chr6	30820037	TCGCCGAAGTGGGCATTCGC	GTCGCCGAAGTGGGCATTCGC	control-gDNA sequences	-	-	-	1907	2334	1504	2096	3745	5234	4692	5244	2746.88	2019.71	4193.97	5686.57	0.694241	0.744661	0.892949	0.825101
+	chr6	30820051	CGGCGATACTCACCACTCGA	GCGGCGATACTCACCACTCGA	control-gDNA sequences	-	-	-	76	172	133	181	219	111	445	443	183.397	167.39	104.397	481.684	0.414403	0.79455	2.09776	0.923842
-	chr6	30820085	GGCACCGAAAGCGCAGCCGC	GGCACCGAAAGCGCAGCCGC	control-gDNA sequences	-	-	-	0	4	0	0	0	0	15	0	7.51709	1.25247	5.82205	6.00696	0	0	0	2.4971
+	chr6	30820091	GCGCTTTCGGTGCCCGCGAG	GCGCTTTCGGTGCCCGCGAG	control-gDNA sequences	-	-	-	5	5	0	0	0	0	117	34	8.72483	1.25247	5.82205	49.5313	0.573077	0	0	2.36214
+	chr6	30820173	TCAGGACCGGAGCCCCGCCG	GTCAGGACCGGAGCCCCGCCG	control-gDNA sequences	-	-	-	283	47	32	18	116	226	296	46	56.1621	22.0689	190.121	64.5256	5.03898	1.45	0.610138	4.58733
-	chr6	30820315	CCGGCAGAGGTAATTTATGTGCT	GCCGGCAGAGGTAATTTATGT	ineffective-gDNA	CTCF_22	DHS_57	Promoter_13	0	0	0	0	0	0	0	0	2.64249	1.25247	5.82205	6.00696	0	0	0	0
+	chr6	30820327	ATTTATGTGCTCCTGAAAATTGG	GATTTATGTGCTCCTGAAAAT	regulatory-gDNA sequences	CTCF_22	DHS_57	Promoter_13	0	0	0	0	0	0	0	0	2.64249	1.25247	5.82205	6.00696	0	0	0	0
+	chr6	30820328	TTTATGTGCTCCTGAAAATTGGG	GTTTATGTGCTCCTGAAAATT	regulatory-gDNA sequences	CTCF_22	DHS_57	Promoter_13	0	0	0	0	0	0	0	0	2.64249	1.25247	5.82205	6.00696	0	0	0	0
+	chr6	30820331	ATGTGCTCCTGAAAATTGGGCGG	GATGTGCTCCTGAAAATTGGG	regulatory-gDNA sequences	CTCF_22	DHS_57	Promoter_13	0	0	0	0	0	0	0	0	2.64249	1.25247	5.82205	6.00696	0	0	0	0
+	chr6	30820332	TGTGCTCCTGAAAATTGGGCGGG	GTGTGCTCCTGAAAATTGGGC	regulatory-gDNA sequences	CTCF_22	DHS_57	Promoter_13	20	19	0	0	61	47	0	49	25.2399	1.25247	49.9228	68.2465	0.792395	0	1.22189	0
-	chr6	30820338	CCTGAAAATTGGGCGGGTCCTTC	GCCTGAAAATTGGGCGGGTCC	ineffective-gDNA	CTCF_22	DHS_57	Promoter_13	1026	1670	906	1544	2544	2304	2638	2582	1913.32	1445.51	1885.86	2857.65	0.536241	0.626768	1.34899	0.923137
+	chr6	30820360	CTAACTCCTCCTCCCGCAGCTGG	GCTAACTCCTCCTCCCGCAGC	regulatory-gDNA sequences	CTCF_22	DHS_57	Promoter_13	169	534	1659	456	609	819	713	412	520.091	408.423	664.819	449.11	0.324943	4.06197	0.916039	1.58758
+	chr6	30820361	TAACTCCTCCTCCCGCAGCTGGG	GTAACTCCTCCTCCCGCAGCT	regulatory-gDNA sequences	CTCF_22	DHS_57	Promoter_13	310	688	325	419	867	945	1317	1188	674.947	379.846	775.073	1358.24	0.459296	0.85561	1.1186	0.969636
+	chr6	30820362	AACTCCTCCTCCCGCAGCTGGGG	GAACTCCTCCTCCCGCAGCTG	regulatory-gDNA sequences	CTCF_22	DHS_57	Promoter_13	320	503	395	722	1236	906	583	813	491.548	603.761	740.886	912.719	0.651005	0.654232	1.66827	0.638751
-	chr6	30820366	CCTCCTCCCGCAGCTGGGGAGCG	GCCTCCTCCCGCAGCTGGGGA	ineffective-gDNA	CTCF_22	DHS_57	Promoter_13	0	0	0	0	0	0	0	0	2.64249	1.25247	5.82205	6.00696	0	0	0	0
+	chr6	30820367	CTCCTCCCGCAGCTGGGGAGCGG	GCTCCTCCCGCAGCTGGGGAG	regulatory-gDNA sequences	CTCF_22	DHS_57	Promoter_13	0	0	0	0	0	0	0	0	2.64249	1.25247	5.82205	6.00696	0	0	0	0
-	chr6	30820369	CCTCCCGCAGCTGGGGAGCGGTT	GCCTCCCGCAGCTGGGGAGCG	ineffective-gDNA	CTCF_22	DHS_57	Promoter_13	75	198	183	234	87	373	620	472	210.441	212.785	295.413	513.63	0.356394	0.860022	0.294503	1.2071
+	chr6	30820371	TCCCGCAGCTGGGGAGCGGTTGG	GTCCCGCAGCTGGGGAGCGGT	regulatory-gDNA sequences	CTCF_22	DHS_57	Promoter_13	0	0	0	0	0	0	0	0	2.64249	1.25247	5.82205	6.00696	0	0	0	0
-	chr6	30820372	CCCGCAGCTGGGGAGCGGTTGGC	GCCCGCAGCTGGGGAGCGGTT	ineffective-gDNA	CTCF_22	DHS_57	Promoter_13	21	18	0	0	168	90	94	9	24.0817	1.25247	87.2997	17.6871	0.872032	0	1.92441	5.31462
-	chr6	30820373	CCGCAGCTGGGGAGCGGTTGGCA	GCCGCAGCTGGGGAGCGGTTG	ineffective-gDNA	CTCF_22	DHS_57	Promoter_13	251	468	212	506	508	736	715	724	459.915	445.371	592.727	806.709	0.545754	0.476008	0.857055	0.886317
+	chr6	30820380	TGGGGAGCGGTTGGCAGCAGCGG	GTGGGGAGCGGTTGGCAGCAG	regulatory-gDNA sequences	CTCF_22	DHS_57	Promoter_13	138	396	275	482	715	512	672	957	395.843	427.828	402.608	1084.98	0.348623	0.642781	1.77592	0.619365
+	chr6	30820381	GGGGAGCGGTTGGCAGCAGCGGG	GGGGAGCGGTTGGCAGCAGC	regulatory-gDNA sequences	CTCF_22	DHS_57	Promoter_13	105	262	160	299	166	320	739	366	274.086	275.279	257.151	402.974	0.383092	0.581228	0.645534	1.83387
+	chr6	30820385	AGCGGTTGGCAGCAGCGGGCTGG	GAGCGGTTGGCAGCAGCGGGC	regulatory-gDNA sequences	CTCF_22	DHS_57	Promoter_13	1011	861	1497	953	1463	1288	1196	1214	886.978	825.298	1073.31	1388.43	1.13983	1.81389	1.36308	0.861406
+	chr6	30820408	AAATTCCGACGATTAAACAAAGG	GAAATTCCGACGATTAAACAA	regulatory-gDNA sequences	CTCF_22	DHS_57	Promoter_13	0	0	0	0	0	0	0	0	2.64249	1.25247	5.82205	6.00696	0	0	0	0
+	chr6	30820409	AATTCCGACGATTAAACAAAGGG	GAATTCCGACGATTAAACAAA	regulatory-gDNA sequences	CTCF_22	DHS_57	Promoter_13	0	0	0	0	0	0	0	0	2.64249	1.25247	5.82205	6.00696	0	0	0	0
-	chr6	30820413	CCGACGATTAAACAAAGGGAGTG	GCCGACGATTAAACAAAGGGA	ineffective-gDNA	CTCF_22	DHS_57	Promoter_13	0	0	0	0	0	0	0	0	2.64249	1.25247	5.82205	6.00696	0	0	0	0
+	chr6	30820414	CGACGATTAAACAAAGGGAGTGG	GCGACGATTAAACAAAGGGAG	regulatory-gDNA sequences	CTCF_22	DHS_57	Promoter_13	0	0	0	0	0	0	0	0	2.64249	1.25247	5.82205	6.00696	0	0	0	0
+	chr6	30820415	GACGATTAAACAAAGGGAGTGGG	GACGATTAAACAAAGGGAGT	regulatory-gDNA sequences	CTCF_22	DHS_57	Promoter_13	0	0	0	0	0	0	0	0	2.64249	1.25247	5.82205	6.00696	0	0	0	0
+	chr6	30820418	GATTAAACAAAGGGAGTGGGTGG	GATTAAACAAAGGGAGTGGG	regulatory-gDNA sequences	CTCF_22	DHS_57	Promoter_13	2	25	15	25	0	29	72	51	32.1338	29.7026	33.4275	70.72	0.0622398	0.505007	0	1.0181
+	chr6	30820442	GACTTGACATGCACAATCCTAGG	GACTTGACATGCACAATCCT	regulatory-gDNA sequences	CTCF_22	DHS_57	Promoter_13	0	0	0	0	0	0	0	0	2.64249	1.25247	5.82205	6.00696	0	0	0	0
-	chr6	30820459	CCTAGGCGCCCAACTGCACGTTG	GCCTAGGCGCCCAACTGCACG	ineffective-gDNA	CTCF_22	DHS_57	Promoter_13	9	55	0	1	178	151	61	117	64.3826	2.4568	135.351	149.197	0.139789	0	1.3151	0.408854
-	chr6	30820467	CCCAACTGCACGTTGTGAGTGTG	GCCCAACTGCACGTTGTGAGT	ineffective-gDNA	CTCF_22	DHS_57	Promoter_13	678	602	364	612	748	1223	1137	1237	585.257	521.175	1017.57	1414.99	1.15847	0.698422	0.735085	0.803537
-	chr6	30822451	CCACCGTGCAGAATTTAACATCT	GCCACCGTGCAGAATTTAACA	ineffective-gDNA	CTCF_23	-	-	0	0	0	0	0	0	0	0	2.64249	1.25247	5.82205	6.00696	0	0	0	0
-	chr6	30822486	CCTGTTTCAGGCGCCCTCTGTTG	GCCTGTTTCAGGCGCCCTCTG	ineffective-gDNA	CTCF_23	-	-	0	0	0	0	0	0	0	0	2.64249	1.25247	5.82205	6.00696	0	0	0	0
+	chr6	30822489	GTTTCAGGCGCCCTCTGTTGAGG	GTTTCAGGCGCCCTCTGTTG	regulatory-gDNA sequences	CTCF_23	-	-	116	214	19	35	268	199	211	504	226.856	40.2085	170.673	549.995	0.511337	0.472537	1.57025	0.38364
+	chr6	30822490	TTTCAGGCGCCCTCTGTTGAGGG	GTTTCAGGCGCCCTCTGTTGA	regulatory-gDNA sequences	CTCF_23	-	-	103	107	62	177	76	128	184	174	116.039	164.085	117.78	212.642	0.887632	0.377854	0.645273	0.865302
-	chr6	30822499	CCCTCTGTTGAGGGTACTACTGT	GCCCTCTGTTGAGGGTACTAC	ineffective-gDNA	CTCF_23	-	-	0	0	0	0	0	0	0	0	2.64249	1.25247	5.82205	6.00696	0	0	0	0
-	chr6	30822500	CCTCTGTTGAGGGTACTACTGTT	GCCTCTGTTGAGGGTACTACT	ineffective-gDNA	CTCF_23	-	-	0	0	0	0	0	0	0	0	2.64249	1.25247	5.82205	6.00696	0	0	0	0
+	chr6	30822513	TACTACTGTTGAGAGTCCTGAGG	GTACTACTGTTGAGAGTCCTG	regulatory-gDNA sequences	CTCF_23	-	-	0	0	0	0	35	55	0	0	2.64249	1.25247	57.1159	6.00696	0	0	0.612789	0
-	chr6	30822529	CCTGAGGCTAGTTTCAGTATAAG	GCCTGAGGCTAGTTTCAGTAT	ineffective-gDNA	CTCF_23	-	-	0	10	0	0	27	33	0	26	14.703	1.25247	37.1323	39.4333	0	0	0.727129	0
-	chr6	30822559	CCATGCAGCTGCCTGAGGAAAGC	GCCATGCAGCTGCCTGAGGAA	ineffective-gDNA	CTCF_23	-	-	30	26	0	0	0	33	116	31	33.2744	1.25247	37.1323	45.7543	0.901593	0	0	2.53528
-	chr6	30822570	CCTGAGGAAAGCCAGATAAAGCT	GCCTGAGGAAAGCCAGATAAA	ineffective-gDNA	CTCF_23	-	-	0	0	0	0	0	0	0	0	2.64249	1.25247	5.82205	6.00696	0	0	0	0
-	chr6	30822581	CCAGATAAAGCTGATACTCCAGC	GCCAGATAAAGCTGATACTCC	ineffective-gDNA	CTCF_23	-	-	0	0	0	0	0	0	0	0	2.64249	1.25247	5.82205	6.00696	0	0	0	0
+	chr6	30822588	AAGCTGATACTCCAGCCATGAGG	GAAGCTGATACTCCAGCCATG	regulatory-gDNA sequences	CTCF_23	-	-	135	253	158	183	418	530	644	645	265.522	169.047	417.554	713.419	0.508432	0.934651	1.00107	0.902695
+	chr6	30822589	AGCTGATACTCCAGCCATGAGGG	GAGCTGATACTCCAGCCATGA	regulatory-gDNA sequences	CTCF_23	-	-	25	19	0	1	0	0	45	15	25.2399	2.4568	5.82205	25.4083	0.990494	0	0	1.77107
-	chr6	30822603	CCATGAGGGCCTTACCCTCCGGC	GCCATGAGGGCCTTACCCTCC	ineffective-gDNA	CTCF_23	-	-	105	117	17	22	15	86	386	280	126.219	26.4605	83.9632	319.834	0.831886	0.642468	0.17865	1.20688
+	chr6	30822609	GGGCCTTACCCTCCGGCATGAGG	GGGCCTTACCCTCCGGCATG	regulatory-gDNA sequences	CTCF_23	-	-	144	236	219	358	505	419	257	245	248.953	329.384	329.499	285.655	0.578421	0.664878	1.53263	0.899685
-	chr6	30822612	CCTTACCCTCCGGCATGAGGAGG	GCCTTACCCTCCGGCATGAGG	ineffective-gDNA	CTCF_23	-	-	0	0	0	0	0	0	0	0	2.64249	1.25247	5.82205	6.00696	0	0	0	0
+	chr6	30822613	CTTACCCTCCGGCATGAGGAGGG	GCTTACCCTCCGGCATGAGGA	regulatory-gDNA sequences	CTCF_23	-	-	0	0	0	0	0	0	0	0	2.64249	1.25247	5.82205	6.00696	0	0	0	0
-	chr6	30822617	CCCTCCGGCATGAGGAGGGAACC	GCCCTCCGGCATGAGGAGGGA	ineffective-gDNA	CTCF_23	-	-	0	0	0	0	0	0	0	0	2.64249	1.25247	5.82205	6.00696	0	0	0	0
-	chr6	30822618	CCTCCGGCATGAGGAGGGAACCA	GCCTCCGGCATGAGGAGGGAA	ineffective-gDNA	CTCF_23	-	-	0	0	0	0	0	0	0	0	2.64249	1.25247	5.82205	6.00696	0	0	0	0
-	chr6	30822644	CCAGGAGAGCTCTCTATCTGTCT	GCCAGGAGAGCTCTCTATCTG	ineffective-gDNA	CTCF_23	-	-	0	0	0	0	0	0	0	0	2.64249	1.25247	5.82205	6.00696	0	0	0	0
+	chr6	30822701	TATATTGAGTTTCTGCCTGAAGG	GTATATTGAGTTTCTGCCTGA	regulatory-gDNA sequences	CTCF_23	-	-	0	0	0	0	0	0	0	0	2.64249	1.25247	5.82205	6.00696	0	0	0	0
-	chr6	30822716	CCTGAAGGAAAGGCAAGCTTTCT	GCCTGAAGGAAAGGCAAGCTT	ineffective-gDNA	CTCF_23	-	-	0	0	0	0	0	0	0	0	2.64249	1.25247	5.82205	6.00696	0	0	0	0
+	chr6	30827954	TTCAGACACCCCGTATTTAC	GTTCAGACACCCCGTATTTAC	control-gDNA sequences	-	-	-	0	0	0	0	0	0	0	0	2.64249	1.25247	5.82205	6.00696	0	0	0	0
-	chr6	30828225	CACGCGATCCCCACTGGGTA	GCACGCGATCCCCACTGGGTA	control-gDNA sequences	-	-	-	53	49	0	0	115	220	99	99	58.2377	1.25247	185.815	128.371	0.910064	0	0.618894	0.771201
+	chr6	30828232	TGGGGATCGCGTGTCAGTAC	GTGGGGATCGCGTGTCAGTAC	control-gDNA sequences	-	-	-	0	0	0	0	0	0	0	0	2.64249	1.25247	5.82205	6.00696	0	0	0	0
+	chr6	30828239	CGCGTGTCAGTACTGGGGTT	GCGCGTGTCAGTACTGGGGTT	control-gDNA sequences	-	-	-	2361	1517	3463	2055	3158	3222	3573	3278	1720.13	1977.23	2610.01	3597.6	1.37257	1.75144	1.20996	0.993161
-	chr6	30829191	GAACGGTTATAGGGTCCAAT	GAACGGTTATAGGGTCCAAT	control-gDNA sequences	-	-	-	0	0	0	0	0	0	0	0	2.64249	1.25247	5.82205	6.00696	0	0	0	0
-	chr6	30835371	CCCCATGATGAATGTCAAACAAA	GCCCCATGATGAATGTCAAAC	ineffective-gDNA	DHS_58	-	-	0	0	0	0	0	0	0	0	2.64249	1.25247	5.82205	6.00696	0	0	0	0
-	chr6	30835372	CCCATGATGAATGTCAAACAAAT	GCCCATGATGAATGTCAAACA	ineffective-gDNA	DHS_58	-	-	9	33	0	0	0	155	75	22	41.1532	1.25247	138.354	34.3524	0.218695	0	0	2.18325
-	chr6	30835373	CCATGATGAATGTCAAACAAATG	GCCATGATGAATGTCAAACAA	ineffective-gDNA	DHS_58	-	-	0	0	0	0	0	0	0	0	2.64249	1.25247	5.82205	6.00696	0	0	0	0
+	chr6	30835382	ATGTCAAACAAATGGAATGTTGG	GATGTCAAACAAATGGAATGT	regulatory-gDNA sequences	DHS_58	-	-	0	0	0	0	0	0	0	0	2.64249	1.25247	5.82205	6.00696	0	0	0	0
+	chr6	30835404	GTACAGAGAGCAAGCATTCTAGG	GTACAGAGAGCAAGCATTCT	regulatory-gDNA sequences	DHS_58	-	-	0	0	0	0	0	0	0	0	2.64249	1.25247	5.82205	6.00696	0	0	0	0
+	chr6	30835417	GCATTCTAGGCATTCGCAGCCGG	GCATTCTAGGCATTCGCAGC	regulatory-gDNA sequences	DHS_58	-	-	0	16	0	0	49	76	1	52	21.7564	1.25247	75.5	71.9546	0	0	0.649006	0.0138977
+	chr6	30835418	CATTCTAGGCATTCGCAGCCGGG	GCATTCTAGGCATTCGCAGCC	regulatory-gDNA sequences	DHS_58	-	-	190	478	267	350	586	722	800	707	468.901	322.386	580.633	786.556	0.405203	0.828199	1.00924	1.01709
+	chr6	30835432	GCAGCCGGGTGAGATCACTGTGG	GCAGCCGGGTGAGATCACTG	regulatory-gDNA sequences	DHS_58	-	-	0	0	0	0	0	0	0	0	2.64249	1.25247	5.82205	6.00696	0	0	0	0
+	chr6	30835444	GATCACTGTGGATGGAGTGATGG	GATCACTGTGGATGGAGTGA	regulatory-gDNA sequences	DHS_58	-	-	0	2	0	0	0	66	83	91	5.0887	1.25247	66.8524	118.982	0	0	0	0.697584
+	chr6	30835445	ATCACTGTGGATGGAGTGATGGG	GATCACTGTGGATGGAGTGAT	regulatory-gDNA sequences	DHS_58	-	-	232	413	168	420	274	520	453	657	410.926	380.636	409.237	727.525	0.564578	0.441367	0.669539	0.622659
+	chr6	30835446	TCACTGTGGATGGAGTGATGGGG	GTCACTGTGGATGGAGTGATG	regulatory-gDNA sequences	DHS_58	-	-	205	347	241	486	479	1034	693	507	352.161	430.774	853.1	553.419	0.58212	0.559458	0.561481	1.25221
+	chr6	30835463	ATGGGGGAAAGCTTTTGTTGAGG	GATGGGGGAAAGCTTTTGTTG	regulatory-gDNA sequences	DHS_58	-	-	192	341	222	367	538	850	674	799	346.769	337.141	691.879	896	0.553682	0.658478	0.777592	0.752232
+	chr6	30835476	TTTGTTGAGGCAGAACCAGCAGG	GTTTGTTGAGGCAGAACCAGC	regulatory-gDNA sequences	DHS_58	-	-	0	0	0	0	0	0	0	0	2.64249	1.25247	5.82205	6.00696	0	0	0	0
-	chr6	30835491	CCAGCAGGAATGTGGGGTAGTCA	GCCAGCAGGAATGTGGGGTAG	ineffective-gDNA	DHS_58	-	-	773	988	601	520	1224	1796	1235	2031	1048.89	455.481	1484.73	2271.69	0.736972	1.31948	0.824392	0.543649
+	chr6	30835515	ACAAACACAGATACAATTCCTGG	GACAAACACAGATACAATTCC	regulatory-gDNA sequences	DHS_58	-	-	0	0	0	0	0	0	0	0	2.64249	1.25247	5.82205	6.00696	0	0	0	0
+	chr6	30839778	TCTGCTCATTTCAAATAGGTTGG	GTCTGCTCATTTCAAATAGGT	regulatory-gDNA sequences	enhancer_6	-	-	0	0	0	0	0	0	0	0	2.64249	1.25247	5.82205	6.00696	0	0	0	0
+	chr6	30839782	CTCATTTCAAATAGGTTGGAAGG	GCTCATTTCAAATAGGTTGGA	regulatory-gDNA sequences	enhancer_6	-	-	0	0	0	0	0	0	0	0	2.64249	1.25247	5.82205	6.00696	0	0	0	0
+	chr6	30839803	GGAAGTCTCTCTGCCACATCTGG	GGAAGTCTCTCTGCCACATC	regulatory-gDNA sequences	enhancer_6	-	-	73	145	74	133	533	295	374	397	155.179	127.966	239.313	433.823	0.470424	0.578278	2.22721	0.862104
-	chr6	30839829	CCAGGGAGGCTTAGAGCCCTGTT	GCCAGGGAGGCTTAGAGCCCT	ineffective-gDNA	enhancer_6	-	-	0	0	0	0	0	0	0	0	2.64249	1.25247	5.82205	6.00696	0	0	0	0
-	chr6	30839846	CCTGTTGCTTCCTGCAGGCAGCC	GCCTGTTGCTTCCTGCAGGCA	ineffective-gDNA	enhancer_6	-	-	6681	7521	4569	8321	11361	14078	13230	13534	9001.23	8172.18	11107.9	14478.9	0.742232	0.559092	1.02279	0.913743
-	chr6	30839926	CCAGGTGGGATTCGAGAACATGT	GCCAGGTGGGATTCGAGAACA	ineffective-gDNA	enhancer_6	-	-	0	0	0	0	0	0	0	0	2.64249	1.25247	5.82205	6.00696	0	0	0	0
+	chr6	30839929	GGTGGGATTCGAGAACATGTAGG	GGTGGGATTCGAGAACATGT	regulatory-gDNA sequences	enhancer_6	-	-	0	0	0	0	0	0	0	0	2.64249	1.25247	5.82205	6.00696	0	0	0	0
+	chr6	30839930	GTGGGATTCGAGAACATGTAGGG	GTGGGATTCGAGAACATGTA	regulatory-gDNA sequences	enhancer_6	-	-	0	0	0	0	0	0	0	0	2.64249	1.25247	5.82205	6.00696	0	0	0	0
+	chr6	30839931	TGGGATTCGAGAACATGTAGGGG	GTGGGATTCGAGAACATGTAG	regulatory-gDNA sequences	enhancer_6	-	-	0	0	0	0	0	0	0	0	2.64249	1.25247	5.82205	6.00696	0	0	0	0
+	chr6	30839987	AGCATAGTTTGTGGAACTCTGGG	GAGCATAGTTTGTGGAACTCT	regulatory-gDNA sequences	enhancer_6	-	-	0	0	0	0	0	0	0	0	2.64249	1.25247	5.82205	6.00696	0	0	0	0
+	chr6	30839988	GCATAGTTTGTGGAACTCTGGGG	GCATAGTTTGTGGAACTCTG	regulatory-gDNA sequences	enhancer_6	-	-	0	2	0	0	0	89	101	76	5.0887	1.25247	86.4681	101.147	0	0	0	0.99855
+	chr6	30839989	CATAGTTTGTGGAACTCTGGGGG	GCATAGTTTGTGGAACTCTGG	regulatory-gDNA sequences	enhancer_6	-	-	0	0	0	0	0	0	0	0	2.64249	1.25247	5.82205	6.00696	0	0	0	0
-	chr6	30845438	CCCCAGCCTCACCTCCACGGGCC	GCCCCAGCCTCACCTCCACGG	ineffective-gDNA	DHS_59	enhancer_7	-	7	42	0	17	65	36	160	169	50.9045	20.9584	39.8959	207.225	0.137512	0	1.62924	0.772107
-	chr6	30845449	CCTCCACGGGCCCTGATGCACTG	GCCTCCACGGGCCCTGATGCA	ineffective-gDNA	DHS_59	enhancer_7	-	512	926	459	777	1452	1664	1781	1441	969.882	649.493	1380.45	1643.61	0.5279	0.706705	1.05183	1.08359
+	chr6	30845450	CTCCACGGGCCCTGATGCACTGG	GCTCCACGGGCCCTGATGCAC	regulatory-gDNA sequences	DHS_59	enhancer_7	-	35	59	0	12	223	63	17	127	68.4208	15.3278	64.2202	160.595	0.511541	0	3.47243	0.105856
-	chr6	30845452	CCACGGGCCCTGATGCACTGGCT	GCCACGGGCCCTGATGCACTG	ineffective-gDNA	DHS_59	enhancer_7	-	407	530	296	614	361	655	476	1013	516.374	522.613	523.082	1151.82	0.788188	0.566385	0.690141	0.413259
+	chr6	30845456	GGGCCCTGATGCACTGGCTTCGG	GGGCCCTGATGCACTGGCTT	regulatory-gDNA sequences	DHS_59	enhancer_7	-	0	7	0	0	0	0	49	17	11.1279	1.25247	5.82205	27.9707	0	0	0	1.75183
-	chr6	30845459	CCCTGATGCACTGGCTTCGGCTG	GCCCTGATGCACTGGCTTCGG	ineffective-gDNA	DHS_59	enhancer_7	-	406	643	433	876	1082	959	652	819	626.818	744.075	787.35	919.888	0.647716	0.581931	1.37423	0.708782
-	chr6	30845460	CCTGATGCACTGGCTTCGGCTGT	GCCTGATGCACTGGCTTCGGC	ineffective-gDNA	DHS_59	enhancer_7	-	613	916	817	966	1769	2271	1840	2227	957.132	839.002	1859.81	2480.14	0.640455	0.973777	0.951172	0.741893
+	chr6	30845507	CTTTGTTCCAGCCCCACTGATGG	GCTTTGTTCCAGCCCCACTGA	regulatory-gDNA sequences	DHS_59	enhancer_7	-	1	11	0	0	80	15	72	0	15.8872	1.25247	20.2705	6.00696	0.0629437	0	3.94661	11.9861
+	chr6	30845508	TTTGTTCCAGCCCCACTGATGGG	GTTTGTTCCAGCCCCACTGAT	regulatory-gDNA sequences	DHS_59	enhancer_7	-	34	28	1	17	141	77	287	58	35.5494	20.9584	76.3544	79.3307	0.956416	0.0477136	1.84665	3.61777
-	chr6	30845518	CCCCACTGATGGGCCTCCTGCCC	GCCCCACTGATGGGCCTCCTG	ineffective-gDNA	DHS_59	enhancer_7	-	13	79	0	0	143	121	67	150	88.1977	1.25247	112.314	186.369	0.147396	0	1.27321	0.359502
-	chr6	30845534	CCTGCCCTCCCCCATGCAGGACT	GCCTGCCCTCCCCCATGCAGG	ineffective-gDNA	DHS_59	enhancer_7	-	10	7	0	0	0	94	37	0	11.1279	1.25247	90.6094	6.00696	0.89864	0	0	6.15952
-	chr6	30845538	CCCTCCCCCATGCAGGACTTAGT	GCCCTCCCCCATGCAGGACTT	ineffective-gDNA	DHS_59	enhancer_7	-	18	68	149	267	104	185	171	163	77.38	243.591	160.501	200.68	0.232618	0.611682	0.64797	0.852105
-	chr6	30845539	CCTCCCCCATGCAGGACTTAGTC	GCCTCCCCCATGCAGGACTTA	ineffective-gDNA	DHS_59	enhancer_7	-	0	0	0	0	0	0	0	0	2.64249	1.25247	5.82205	6.00696	0	0	0	0
-	chr6	30845542	CCCCCATGCAGGACTTAGTCACC	GCCCCCATGCAGGACTTAGTC	ineffective-gDNA	DHS_59	enhancer_7	-	0	0	0	0	0	0	0	0	2.64249	1.25247	5.82205	6.00696	0	0	0	0
-	chr6	30845543	CCCCATGCAGGACTTAGTCACCG	GCCCCATGCAGGACTTAGTCA	ineffective-gDNA	DHS_59	enhancer_7	-	0	0	0	0	0	0	0	0	2.64249	1.25247	5.82205	6.00696	0	0	0	0
-	chr6	30845544	CCCATGCAGGACTTAGTCACCGC	GCCCATGCAGGACTTAGTCAC	ineffective-gDNA	DHS_59	enhancer_7	-	158	378	644	191	207	191	423	411	379.85	175.704	164.869	448.082	0.415954	3.66526	1.25554	0.944023
+	chr6	30845565	GCTCGTGTCATCAATCCCTCTGG	GCTCGTGTCATCAATCCCTC	regulatory-gDNA sequences	DHS_59	enhancer_7	-	0	0	0	0	0	0	0	0	2.64249	1.25247	5.82205	6.00696	0	0	0	0
-	chr6	30845595	CCCTCCTCCAGACACCCATGCTC	GCCCTCCTCCAGACACCCATG	ineffective-gDNA	DHS_59	enhancer_7	-	40	108	238	302	32	70	236	274	117.052	278.179	70.3344	314.023	0.341728	0.855563	0.45497	0.751538
-	chr6	30845596	CCTCCTCCAGACACCCATGCTCC	GCCTCCTCCAGACACCCATGC	ineffective-gDNA	DHS_59	enhancer_7	-	67	83	28	135	156	64	229	75	92.1241	129.614	65.0996	99.9467	0.72728	0.216026	2.39633	2.29122
-	chr6	30845599	CCTCCAGACACCCATGCTCCCCA	GCCTCCAGACACCCATGCTCC	ineffective-gDNA	DHS_59	enhancer_7	-	186	310	389	196	109	350	62	181	318.674	179.893	278.709	220.154	0.583669	2.1624	0.39109	0.281621
-	chr6	30845610	CCATGCTCCCCACATCCTTTATT	GCCATGCTCCCCACATCCTTT	ineffective-gDNA	DHS_59	enhancer_7	-	0	0	0	0	0	0	0	0	2.64249	1.25247	5.82205	6.00696	0	0	0	0
-	chr6	30845656	CCCCCCAACCCCCATGATTAAAA	GCCCCCCAACCCCCATGATTA	ineffective-gDNA	DHS_59	enhancer_7	-	0	0	0	0	0	0	0	0	2.64249	1.25247	5.82205	6.00696	0	0	0	0
-	chr6	30845657	CCCCCAACCCCCATGATTAAAAT	GCCCCCAACCCCCATGATTAA	ineffective-gDNA	DHS_59	enhancer_7	-	0	0	0	0	0	0	0	0	2.64249	1.25247	5.82205	6.00696	0	0	0	0
-	chr6	30845665	CCCCATGATTAAAATAGTACATG	GCCCCATGATTAAAATAGTAC	ineffective-gDNA	DHS_59	enhancer_7	-	0	0	0	0	0	0	0	0	2.64249	1.25247	5.82205	6.00696	0	0	0	0
+	chr6	30846420	GAGAGGTCCGTGAACAATCC	GAGAGGTCCGTGAACAATCC	control-gDNA sequences	-	-	-	33	27	0	0	46	52	0	37	34.4129	1.25247	54.4279	53.2967	0.958942	0	0.845155	0
+	chr6	30850298	CTAGCCCCTCAATAGCGCAG	GCTAGCCCCTCAATAGCGCAG	control-gDNA sequences	-	-	-	0	0	0	0	0	0	0	0	2.64249	1.25247	5.82205	6.00696	0	0	0	0
+	chr6	30852533	CGTGGCTACGTGACTTACTG	GCGTGGCTACGTGACTTACTG	control-gDNA sequences	-	-	-	0	9	0	0	0	0	0	119	13.5151	1.25247	5.82205	151.487	0	0	0	0
+	chr6	30855430	CAAGTTTGCAGGAACGGACG	GCAAGTTTGCAGGAACGGACG	control-gDNA sequences	-	-	-	41	43	53	170	70	165	77	20	51.9644	158.32	145.804	31.8039	0.789002	0.334764	0.480096	2.42109
+	chr6	30855442	AACGGACGGGGTTTGCTCCA	GAACGGACGGGGTTTGCTCCA	control-gDNA sequences	-	-	-	217	132	33	59	163	334	594	238	141.667	63.7814	267.185	278.716	1.53176	0.517392	0.610065	2.1312
+	chr6	30857761	GGGCAATGGCTTCCGCCATCTGG	GGGCAATGGCTTCCGCCATC	regulatory-gDNA sequences	DHS_60	-	-	20	23	0	0	33	83	59	21	29.8458	1.25247	81.4429	33.0788	0.670111	0	0.405192	1.78362
+	chr6	30857767	TGGCTTCCGCCATCTGGACCAGG	GTGGCTTCCGCCATCTGGACC	regulatory-gDNA sequences	DHS_60	-	-	311	464	4940	484	474	986	1279	1160	456.329	429.302	811.028	1325.57	0.681525	11.507	0.584443	0.96487
-	chr6	30857773	CCGCCATCTGGACCAGGTGACGT	GCCGCCATCTGGACCAGGTGA	ineffective-gDNA	DHS_60	-	-	154	234	114	295	969	863	569	597	246.972	271.385	703.244	657.271	0.623551	0.420067	1.3779	0.8657
-	chr6	30857776	CCATCTGGACCAGGTGACGTCAG	GCCATCTGGACCAGGTGACGT	ineffective-gDNA	DHS_60	-	-	695	957	547	992	860	1319	1392	1420	1009.39	866.4	1099.68	1620.76	0.688533	0.631348	0.782048	0.858857
+	chr6	30857784	ACCAGGTGACGTCAGCTATCTGG	GACCAGGTGACGTCAGCTATC	regulatory-gDNA sequences	DHS_60	-	-	0	0	0	0	0	0	0	0	2.64249	1.25247	5.82205	6.00696	0	0	0	0
-	chr6	30857785	CCAGGTGACGTCAGCTATCTGGA	GCCAGGTGACGTCAGCTATCT	ineffective-gDNA	DHS_60	-	-	0	0	0	0	0	0	0	0	2.64249	1.25247	5.82205	6.00696	0	0	0	0
+	chr6	30857805	GGATTTCTGCCAGCATTCCCCGG	GGATTTCTGCCAGCATTCCC	regulatory-gDNA sequences	DHS_60	-	-	154	317	217	478	711	901	897	892	325.058	424.873	736.506	1007.22	0.473762	0.510741	0.965369	0.890571
-	chr6	30857814	CCAGCATTCCCCGGCCCAGGAAA	GCCAGCATTCCCCGGCCCAGG	ineffective-gDNA	DHS_60	-	-	85	146	102	213	464	295	199	62	156.222	194.345	239.313	84.2188	0.544098	0.524839	1.93888	2.36289
-	chr6	30857822	CCCCGGCCCAGGAAACAGACTTC	GCCCCGGCCCAGGAAACAGAC	ineffective-gDNA	DHS_60	-	-	16	5	0	0	0	0	0	0	8.72483	1.25247	5.82205	6.00696	1.83385	0	0	0
-	chr6	30857823	CCCGGCCCAGGAAACAGACTTCC	GCCCGGCCCAGGAAACAGACT	ineffective-gDNA	DHS_60	-	-	0	0	0	0	0	0	0	0	2.64249	1.25247	5.82205	6.00696	0	0	0	0
-	chr6	30857824	CCGGCCCAGGAAACAGACTTCCG	GCCGGCCCAGGAAACAGACTT	ineffective-gDNA	DHS_60	-	-	0	0	0	0	0	0	0	0	2.64249	1.25247	5.82205	6.00696	0	0	0	0
-	chr6	30857828	CCCAGGAAACAGACTTCCGGCTG	GCCCAGGAAACAGACTTCCGG	ineffective-gDNA	DHS_60	-	-	917	887	556	1059	1332	1694	2847	1810	920.148	936.955	1404.16	2036.62	0.996578	0.593412	0.948613	1.3979
+	chr6	30857833	GAAACAGACTTCCGGCTGTCTGG	GAAACAGACTTCCGGCTGTC	regulatory-gDNA sequences	DHS_60	-	-	11730	13893	9880	16113	20673	24660	23653	22281	16133	15124.9	19289.4	23737	0.72708	0.653227	1.07173	0.99646
+	chr6	30857834	AAACAGACTTCCGGCTGTCTGGG	GAAACAGACTTCCGGCTGTCT	regulatory-gDNA sequences	DHS_60	-	-	2359	4678	3730	4839	5124	8000	8166	8318	5628.08	4802.12	6364.59	8949.63	0.419148	0.77674	0.805079	0.91244
-	chr6	30857844	CCGGCTGTCTGGGCTCTGAGCCA	GCCGGCTGTCTGGGCTCTGAG	ineffective-gDNA	DHS_60	-	-	0	0	0	0	1	1	0	0	2.64249	1.25247	6.79725	6.00696	0	0	0.147118	0
+	chr6	30857851	TCTGGGCTCTGAGCCATCTTCGG	GTCTGGGCTCTGAGCCATCTT	regulatory-gDNA sequences	DHS_60	-	-	0	0	0	0	0	0	0	0	2.64249	1.25247	5.82205	6.00696	0	0	0	0
+	chr6	30857859	CTGAGCCATCTTCGGCCTCCTGG	GCTGAGCCATCTTCGGCCTCC	regulatory-gDNA sequences	DHS_60	-	-	3465	3966	2371	3359	5470	7062	6086	6996	4762.81	3315.34	5629.37	7546.78	0.727512	0.715161	0.971689	0.806437
-	chr6	30857864	CCATCTTCGGCCTCCTGGGTGAG	GCCATCTTCGGCCTCCTGGGT	ineffective-gDNA	DHS_60	-	-	2795	3768	3490	3895	4261	5868	5457	4960	4520.67	3857.66	4692.2	5384.91	0.618271	0.904693	0.908103	1.01339
+	chr6	30857867	TCTTCGGCCTCCTGGGTGAGTGG	GTCTTCGGCCTCCTGGGTGAG	regulatory-gDNA sequences	DHS_60	-	-	35	182	264	258	433	315	745	238	193.834	234.928	253.577	278.716	0.180567	1.12375	1.70757	2.67297
-	chr6	30857874	CCTCCTGGGTGAGTGGGTCTTGC	GCCTCCTGGGTGAGTGGGTCT	ineffective-gDNA	DHS_60	-	-	384	273	370	414	203	482	585	298	284.446	375.881	378.269	337.196	1.34999	0.984355	0.536655	1.7349
-	chr6	30857877	CCTGGGTGAGTGGGTCTTGCAAT	GCCTGGGTGAGTGGGTCTTGC	ineffective-gDNA	DHS_60	-	-	361	556	143	295	926	1120	671	1089	540.741	271.385	928.266	1242.04	0.667603	0.526926	0.997559	0.540239
+	chr6	30857890	GTCTTGCAATTCGCAAAGTGAGG	GTCTTGCAATTCGCAAAGTG	regulatory-gDNA sequences	DHS_60	-	-	0	0	0	0	0	0	0	0	2.64249	1.25247	5.82205	6.00696	0	0	0	0
+	chr6	30866445	GAGTCATTGAAGGCAACTGCAGG	GAGTCATTGAAGGCAACTGC	regulatory-gDNA sequences	CTCF_24	DHS_61	-	0	0	0	0	0	0	0	0	2.64249	1.25247	5.82205	6.00696	0	0	0	0
+	chr6	30866461	CTGCAGGAGTTGCCCCTTCCTGG	GCTGCAGGAGTTGCCCCTTCC	regulatory-gDNA sequences	CTCF_24	DHS_61	-	1609	1428	970	1729	1653	2354	2095	2271	1607.55	1638.49	1925.33	2526.93	1.0009	0.592007	0.858556	0.829068
-	chr6	30866479	CCTGGCTCCCTCCCATGGCAACT	GCCTGGCTCCCTCCCATGGCA	ineffective-gDNA	CTCF_24	DHS_61	-	152	338	186	109	503	358	917	806	344.069	107.974	284.498	904.358	0.441772	1.72263	1.76803	1.01398
-	chr6	30866486	CCCTCCCATGGCAACTCCCTGAG	GCCCTCCCATGGCAACTCCCT	ineffective-gDNA	CTCF_24	DHS_61	-	90	105	685	467	324	293	71	177	114.017	416.691	237.889	215.872	0.789357	1.6439	1.36198	0.328899
-	chr6	30866487	CCTCCCATGGCAACTCCCTGAGT	GCCTCCCATGGCAACTCCCTG	ineffective-gDNA	CTCF_24	DHS_61	-	452	1025	817	957	964	1098	1663	1400	1096	829.515	909.076	1598.83	0.412408	0.984913	1.06042	1.04013
-	chr6	30866490	CCCATGGCAACTCCCTGAGTCTG	GCCCATGGCAACTCCCTGAGT	ineffective-gDNA	CTCF_24	DHS_61	-	260	421	555	809	918	818	958	654	418.025	678.117	663.947	723.996	0.621972	0.818443	1.38264	1.32321
-	chr6	30866491	CCATGGCAACTCCCTGAGTCTGA	GCCATGGCAACTCCCTGAGTC	ineffective-gDNA	CTCF_24	DHS_61	-	553	1277	689	1446	1875	2659	2662	2581	1416.23	1343.06	2166.01	2856.59	0.390475	0.513009	0.865648	0.931882
-	chr6	30866502	CCCTGAGTCTGAGTAGAGAAGGT	GCCCTGAGTCTGAGTAGAGAA	ineffective-gDNA	CTCF_24	DHS_61	-	0	0	0	0	0	0	0	0	2.64249	1.25247	5.82205	6.00696	0	0	0	0
-	chr6	30866503	CCTGAGTCTGAGTAGAGAAGGTT	GCCTGAGTCTGAGTAGAGAAG	ineffective-gDNA	CTCF_24	DHS_61	-	0	0	0	0	0	0	0	0	2.64249	1.25247	5.82205	6.00696	0	0	0	0
+	chr6	30866515	TAGAGAAGGTTAGAGACGCATGG	GTAGAGAAGGTTAGAGACGCA	regulatory-gDNA sequences	CTCF_24	DHS_61	-	0	0	0	0	0	0	0	0	2.64249	1.25247	5.82205	6.00696	0	0	0	0
+	chr6	30866518	AGAAGGTTAGAGACGCATGGAGG	GAGAAGGTTAGAGACGCATGG	regulatory-gDNA sequences	CTCF_24	DHS_61	-	57	96	196	475	62	85	46	88	104.98	422.649	83.1248	115.439	0.542959	0.463741	0.745866	0.398478
+	chr6	30866540	GTTCCCACCCCTCCTGTGAAAGG	GTTCCCACCCCTCCTGTGAA	regulatory-gDNA sequences	CTCF_24	DHS_61	-	0	0	0	0	0	0	0	0	2.64249	1.25247	5.82205	6.00696	0	0	0	0
-	chr6	30866544	CCACCCCTCCTGTGAAAGGCTCC	GCCACCCCTCCTGTGAAAGGC	ineffective-gDNA	CTCF_24	DHS_61	-	70	187	50	94	291	166	438	257	199.039	95.1765	146.545	297.46	0.35169	0.52534	1.98574	1.47247
-	chr6	30866548	CCCTCCTGTGAAAGGCTCCCTTC	GCCCTCCTGTGAAAGGCTCCC	ineffective-gDNA	CTCF_24	DHS_61	-	215	137	446	883	109	358	151	240	146.854	751.462	284.498	280.703	1.46404	0.59351	0.383131	0.537935
-	chr6	30866549	CCTCCTGTGAAAGGCTCCCTTCT	GCCTCCTGTGAAAGGCTCCCT	ineffective-gDNA	CTCF_24	DHS_61	-	70	270	61	173	423	220	195	229	281.629	160.788	185.815	269.728	0.248554	0.379382	2.27645	0.722952
-	chr6	30866552	CCTGTGAAAGGCTCCCTTCTGAG	GCCTGTGAAAGGCTCCCTTCT	ineffective-gDNA	CTCF_24	DHS_61	-	0	0	0	0	0	0	0	0	2.64249	1.25247	5.82205	6.00696	0	0	0	0
+	chr6	30866559	AAGGCTCCCTTCTGAGTTCCAGG	GAAGGCTCCCTTCTGAGTTCC	regulatory-gDNA sequences	CTCF_24	DHS_61	-	706	1436	900	1616	2233	2346	2836	2782	1617.68	1520.68	1919.01	3070.3	0.436429	0.591839	1.16362	0.923687
-	chr6	30866565	CCCTTCTGAGTTCCAGGTCCCTA	GCCCTTCTGAGTTCCAGGTCC	ineffective-gDNA	CTCF_24	DHS_61	-	9605	8919	10244	10333	11315	17440	12979	14019	10614.3	10041.9	13717.1	14992.6	0.904914	1.02013	0.824883	0.865691
-	chr6	30866584	CCTATCTGATGACCCACCTCACC	GCCTATCTGATGACCCACCTC	ineffective-gDNA	CTCF_24	DHS_61	-	62	58	86	104	270	27	86	46	67.4151	103.74	31.5663	64.5256	0.919676	0.828995	8.55344	1.33281
-	chr6	30866597	CCACCTCACCTATGCCTGCCTAA	GCCACCTCACCTATGCCTGCC	ineffective-gDNA	CTCF_24	DHS_61	-	2999	4217	3561	5236	5343	6126	7429	7651	5068.81	5195.3	4894.83	8241.92	0.591658	0.685427	1.09156	0.901368
-	chr6	30866600	CCTCACCTATGCCTGCCTAATAC	GCCTCACCTATGCCTGCCTAA	ineffective-gDNA	CTCF_24	DHS_61	-	7	17	77	162	198	137	0	179	22.9205	151.755	124.722	218.016	0.305403	0.507397	1.58754	0
-	chr6	30866605	CCTATGCCTGCCTAATACCTGAA	GCCTATGCCTGCCTAATACCT	ineffective-gDNA	CTCF_24	DHS_61	-	0	0	0	0	0	0	0	0	2.64249	1.25247	5.82205	6.00696	0	0	0	0
+	chr6	30866608	ATGCCTGCCTAATACCTGAATGG	GATGCCTGCCTAATACCTGAA	regulatory-gDNA sequences	CTCF_24	DHS_61	-	0	0	0	0	0	0	0	0	2.64249	1.25247	5.82205	6.00696	0	0	0	0
+	chr6	30883766	GCCCACCATTAGACAAGCGT	GCCCACCATTAGACAAGCGT	control-gDNA sequences	-	-	-	0	0	0	0	0	0	0	0	2.64249	1.25247	5.82205	6.00696	0	0	0	0
-	chr6	30886551	CCTAGAAGCAAAGAACTCGCCTG	GCCTAGAAGCAAAGAACTCGC	ineffective-gDNA	DHS_62	enhancer_8	-	0	0	0	0	0	0	0	0	2.64249	1.25247	5.82205	6.00696	0	0	0	0
-	chr6	30886570	CCTGTCATATGTAGATCAACCAA	GCCTGTCATATGTAGATCAAC	ineffective-gDNA	DHS_62	enhancer_8	-	0	0	0	0	0	0	0	0	2.64249	1.25247	5.82205	6.00696	0	0	0	0
-	chr6	30886589	CCAAGCTAGACCCCATCCTCCCA	GCCAAGCTAGACCCCATCCTC	ineffective-gDNA	DHS_62	enhancer_8	-	113	172	66	167	115	225	281	480	183.397	155.856	189.404	522.691	0.616151	0.423468	0.607168	0.537602
-	chr6	30886616	CCACCTTCATCAGGCTCTGCCAC	GCCACCTTCATCAGGCTCTGC	ineffective-gDNA	DHS_62	enhancer_8	-	485	843	714	1035	1554	1450	1319	1470	864.006	911.69	1209.2	1674.87	0.561339	0.783161	1.28514	0.787524
-	chr6	30886619	CCTTCATCAGGCTCTGCCACTCC	GCCTTCATCAGGCTCTGCCAC	ineffective-gDNA	DHS_62	enhancer_8	-	0	0	0	0	0	0	0	0	2.64249	1.25247	5.82205	6.00696	0	0	0	0
-	chr6	30886635	CCACTCCTAGCTGCAATTCCCCT	GCCACTCCTAGCTGCAATTCC	ineffective-gDNA	DHS_62	enhancer_8	-	879	1891	1203	1983	2718	3995	4191	3466	2191.63	1902.56	3219.07	3797.44	0.401071	0.632305	0.844342	1.10364
-	chr6	30886640	CCTAGCTGCAATTCCCCTAGTCA	GCCTAGCTGCAATTCCCCTAG	ineffective-gDNA	DHS_62	enhancer_8	-	0	0	0	0	0	0	0	0	2.64249	1.25247	5.82205	6.00696	0	0	0	0
+	chr6	30886647	GCAATTCCCCTAGTCAGCCCAGG	GCAATTCCCCTAGTCAGCCC	regulatory-gDNA sequences	DHS_62	enhancer_8	-	38	88	55	100	114	81	510	140	97.0446	100.331	79.7539	175.236	0.391572	0.548187	1.4294	2.91036
-	chr6	30886653	CCCCTAGTCAGCCCAGGACCAGT	GCCCCTAGTCAGCCCAGGACC	ineffective-gDNA	DHS_62	enhancer_8	-	112	163	72	145	543	596	499	465	173.986	137.829	472.936	505.771	0.643732	0.522387	1.14815	0.986613
-	chr6	30886664	CCCAGGACCAGTACTAGAGAGCT	GCCCAGGACCAGTACTAGAGA	ineffective-gDNA	DHS_62	enhancer_8	-	0	0	0	0	0	0	0	0	2.64249	1.25247	5.82205	6.00696	0	0	0	0
-	chr6	30886665	CCAGGACCAGTACTAGAGAGCTA	GCCAGGACCAGTACTAGAGAG	ineffective-gDNA	DHS_62	enhancer_8	-	0	0	0	0	0	0	0	0	2.64249	1.25247	5.82205	6.00696	0	0	0	0
+	chr6	30886667	AGGACCAGTACTAGAGAGCTAGG	GAGGACCAGTACTAGAGAGCT	regulatory-gDNA sequences	DHS_62	enhancer_8	-	0	0	0	0	0	0	0	0	2.64249	1.25247	5.82205	6.00696	0	0	0	0
-	chr6	30886671	CCAGTACTAGAGAGCTAGGGACA	GCCAGTACTAGAGAGCTAGGG	ineffective-gDNA	DHS_62	enhancer_8	-	0	0	0	0	0	0	0	0	2.64249	1.25247	5.82205	6.00696	0	0	0	0
-	chr6	30890097	CCTTCAACCATGGAAACTTGATT	GCCTTCAACCATGGAAACTTG	ineffective-gDNA	DHS_63	-	-	0	0	0	0	0	0	0	0	2.64249	1.25247	5.82205	6.00696	0	0	0	0
+	chr6	30890162	TCAGACTGCCTTGAATCCAGGGG	GTCAGACTGCCTTGAATCCAG	regulatory-gDNA sequences	DHS_63	-	-	0	0	0	0	0	0	0	0	2.64249	1.25247	5.82205	6.00696	0	0	0	0
+	chr6	30890165	GACTGCCTTGAATCCAGGGGTGG	GACTGCCTTGAATCCAGGGG	regulatory-gDNA sequences	DHS_63	-	-	7	17	0	0	0	64	90	99	22.9205	1.25247	65.0996	128.371	0.305403	0	0	0.701091
-	chr6	30890188	CCACATGACTGGGTAATGAGTCA	GCCACATGACTGGGTAATGAG	ineffective-gDNA	DHS_63	-	-	0	0	0	0	0	0	0	0	2.64249	1.25247	5.82205	6.00696	0	0	0	0
+	chr6	30890192	ATGACTGGGTAATGAGTCACCGG	GATGACTGGGTAATGAGTCAC	regulatory-gDNA sequences	DHS_63	-	-	17	41	0	0	206	101	0	17	49.8403	1.25247	96.3398	27.9707	0.34109	0	2.13826	0
+	chr6	30890202	AATGAGTCACCGGTAGAAGTCGG	GAATGAGTCACCGGTAGAAGT	regulatory-gDNA sequences	DHS_63	-	-	0	0	0	0	0	0	0	0	2.64249	1.25247	5.82205	6.00696	0	0	0	0
+	chr6	30890210	ACCGGTAGAAGTCGGCTTGATGG	GACCGGTAGAAGTCGGCTTGA	regulatory-gDNA sequences	DHS_63	-	-	75	244	185	256	256	491	161	245	256.813	233.032	385.486	285.655	0.292041	0.793884	0.664097	0.563616
-	chr6	30890211	CCGGTAGAAGTCGGCTTGATGGG	GCCGGTAGAAGTCGGCTTGAT	ineffective-gDNA	DHS_63	-	-	377	605	236	393	621	702	978	653	588.232	358.916	563.394	722.82	0.640903	0.657535	1.10225	1.35303
+	chr6	30890212	CGGTAGAAGTCGGCTTGATGGGG	GCGGTAGAAGTCGGCTTGATG	regulatory-gDNA sequences	DHS_63	-	-	2690	1257	3960	1731	3249	3363	4266	2816	1390.85	1640.58	2721.16	3106.45	1.93406	2.41378	1.19398	1.37327
+	chr6	30890220	GTCGGCTTGATGGGGCTTTTAGG	GTCGGCTTGATGGGGCTTTT	regulatory-gDNA sequences	DHS_63	-	-	120	200	210	300	359	231	315	316	212.505	276.248	193.703	354.51	0.564692	0.760187	1.85335	0.88855
+	chr6	30890221	TCGGCTTGATGGGGCTTTTAGGG	GTCGGCTTGATGGGGCTTTTA	regulatory-gDNA sequences	DHS_63	-	-	0	0	0	0	0	0	0	0	2.64249	1.25247	5.82205	6.00696	0	0	0	0
+	chr6	30890230	TGGGGCTTTTAGGGAAACAACGG	GTGGGGCTTTTAGGGAAACAA	regulatory-gDNA sequences	DHS_63	-	-	0	0	0	0	0	0	0	0	2.64249	1.25247	5.82205	6.00696	0	0	0	0
-	chr6	30895643	TGATAGTGGGTGGGATCGCC	GTGATAGTGGGTGGGATCGCC	control-gDNA sequences	-	-	-	0	0	0	0	0	0	0	0	2.64249	1.25247	5.82205	6.00696	0	0	0	0
-	chr6	30895643	GGCGATCCCACCCACTATCA	GGCGATCCCACCCACTATCA	control-gDNA sequences	-	-	-	3975	4488	3594	5933	8736	10102	10184	10945	5398.01	5879.92	8008.99	11735.5	0.736383	0.611232	1.09077	0.867797
+	chr6	30895742	TGAACAGGCCGGCAAAGTGT	GTGAACAGGCCGGCAAAGTGT	control-gDNA sequences	-	-	-	0	5	0	0	44	169	17	0	8.72483	1.25247	148.763	6.00696	0	0	0.295772	2.83005
-	chr6	30897878	CCACCAGATGGCATAACTGGGCT	GCCACCAGATGGCATAACTGG	ineffective-gDNA	CTCF_25	-	-	0	0	0	0	0	0	0	0	2.64249	1.25247	5.82205	6.00696	0	0	0	0
-	chr6	30897881	CCAGATGGCATAACTGGGCTCAT	GCCAGATGGCATAACTGGGCT	ineffective-gDNA	CTCF_25	-	-	83	360	96	169	333	657	317	615	363.802	157.499	524.791	678.272	0.228146	0.609529	0.634538	0.467364
+	chr6	30897948	AAAAAACTCTAGATAATTAATGG	GAAAAAACTCTAGATAATTAA	regulatory-gDNA sequences	CTCF_25	-	-	0	0	0	0	0	0	0	0	2.64249	1.25247	5.82205	6.00696	0	0	0	0
-	chr6	30897979	CCCCTGAGAAAGCTCATTTCTAA	GCCCCTGAGAAAGCTCATTTC	ineffective-gDNA	CTCF_25	-	-	0	0	0	0	0	0	0	0	2.64249	1.25247	5.82205	6.00696	0	0	0	0
-	chr6	30897981	CCTGAGAAAGCTCATTTCTAATT	GCCTGAGAAAGCTCATTTCTA	ineffective-gDNA	CTCF_25	-	-	0	0	0	0	0	0	0	0	2.64249	1.25247	5.82205	6.00696	0	0	0	0
+	chr6	30897996	TTCTAATTCTTACTCCTAGCTGG	GTTCTAATTCTTACTCCTAGC	regulatory-gDNA sequences	CTCF_25	-	-	0	0	0	0	0	0	0	0	2.64249	1.25247	5.82205	6.00696	0	0	0	0
-	chr6	30898010	CCTAGCTGGCTTTTTATACACAG	GCCTAGCTGGCTTTTTATACA	ineffective-gDNA	CTCF_25	-	-	0	0	0	0	0	0	0	0	2.64249	1.25247	5.82205	6.00696	0	0	0	0
+	chr6	30898011	CTAGCTGGCTTTTTATACACAGG	GCTAGCTGGCTTTTTATACAC	regulatory-gDNA sequences	CTCF_25	-	-	0	0	0	0	0	0	0	0	2.64249	1.25247	5.82205	6.00696	0	0	0	0
+	chr6	30898015	CTGGCTTTTTATACACAGGCAGG	GCTGGCTTTTTATACACAGGC	regulatory-gDNA sequences	CTCF_25	-	-	132	54	0	0	112	0	0	0	63.3663	1.25247	5.82205	6.00696	2.08313	0	19.2372	0
+	chr6	30898016	TGGCTTTTTATACACAGGCAGGG	GTGGCTTTTTATACACAGGCA	regulatory-gDNA sequences	CTCF_25	-	-	41	74	15	55	246	197	75	209	83.2896	59.9938	169.224	249.441	0.492258	0.250026	1.45369	0.300672
+	chr6	30898017	GGCTTTTTATACACAGGCAGGGG	GGCTTTTTATACACAGGCAG	regulatory-gDNA sequences	CTCF_25	-	-	0	0	0	0	0	0	0	0	2.64249	1.25247	5.82205	6.00696	0	0	0	0
+	chr6	30898031	AGGCAGGGGAGACCCATCTTTGG	GAGGCAGGGGAGACCCATCTT	regulatory-gDNA sequences	CTCF_25	-	-	0	0	0	0	0	0	0	0	2.64249	1.25247	5.82205	6.00696	0	0	0	0
+	chr6	30898041	GACCCATCTTTGGAATTTTAAGG	GACCCATCTTTGGAATTTTA	regulatory-gDNA sequences	CTCF_25	-	-	0	0	0	0	0	0	0	0	2.64249	1.25247	5.82205	6.00696	0	0	0	0
-	chr6	30898043	CCCATCTTTGGAATTTTAAGGTT	GCCCATCTTTGGAATTTTAAG	ineffective-gDNA	CTCF_25	-	-	0	0	0	0	0	0	0	0	2.64249	1.25247	5.82205	6.00696	0	0	0	0
-	chr6	30898044	CCATCTTTGGAATTTTAAGGTTC	GCCATCTTTGGAATTTTAAGG	ineffective-gDNA	CTCF_25	-	-	0	0	0	0	0	0	0	0	2.64249	1.25247	5.82205	6.00696	0	0	0	0
+	chr6	30898051	TGGAATTTTAAGGTTCAAAAAGG	GTGGAATTTTAAGGTTCAAAA	regulatory-gDNA sequences	CTCF_25	-	-	0	0	0	0	0	0	0	0	2.64249	1.25247	5.82205	6.00696	0	0	0	0
+	chr6	30898071	AGGAATTTGTCTGTACCTGATGG	GAGGAATTTGTCTGTACCTGA	regulatory-gDNA sequences	CTCF_25	-	-	0	0	0	0	0	0	0	0	2.64249	1.25247	5.82205	6.00696	0	0	0	0
-	chr6	30900625	CAAGCGGAACGTGCTATGGA	GCAAGCGGAACGTGCTATGGA	control-gDNA sequences	-	-	-	13	42	0	0	220	30	90	75	50.9045	1.25247	34.3559	99.9467	0.25538	0	6.40356	0.90048
+	chr6	30902859	GTTCAGGACTAGGTCTTATATGG	GTTCAGGACTAGGTCTTATA	regulatory-gDNA sequences	DHS_64	-	-	0	0	0	0	0	0	0	0	2.64249	1.25247	5.82205	6.00696	0	0	0	0
+	chr6	30902866	ACTAGGTCTTATATGGCAGTCGG	GACTAGGTCTTATATGGCAGT	regulatory-gDNA sequences	DHS_64	-	-	0	9	0	0	26	0	0	0	13.5151	1.25247	5.82205	6.00696	0	0	4.46578	0
+	chr6	30902867	CTAGGTCTTATATGGCAGTCGGG	GCTAGGTCTTATATGGCAGTC	regulatory-gDNA sequences	DHS_64	-	-	27	106	132	323	163	252	124	273	115.027	298.012	208.702	313.053	0.234727	0.442935	0.781017	0.3961
+	chr6	30902868	TAGGTCTTATATGGCAGTCGGGG	GTAGGTCTTATATGGCAGTCG	regulatory-gDNA sequences	DHS_64	-	-	75	193	176	192	331	342	229	443	205.268	176.54	272.938	481.684	0.365376	0.996942	1.21273	0.475415
+	chr6	30902881	GCAGTCGGGGCTCCTGCCCTGGG	GCAGTCGGGGCTCCTGCCCT	regulatory-gDNA sequences	DHS_64	-	-	0	0	0	0	0	0	0	0	2.64249	1.25247	5.82205	6.00696	0	0	0	0
-	chr6	30902893	CCTGCCCTGGGATAACCCTGGGA	GCCTGCCCTGGGATAACCCTG	ineffective-gDNA	DHS_64	-	-	0	0	0	0	0	0	0	0	2.64249	1.25247	5.82205	6.00696	0	0	0	0
-	chr6	30902897	CCCTGGGATAACCCTGGGAATGA	GCCCTGGGATAACCCTGGGAA	ineffective-gDNA	DHS_64	-	-	0	0	0	0	0	0	0	0	2.64249	1.25247	5.82205	6.00696	0	0	0	0
-	chr6	30902898	CCTGGGATAACCCTGGGAATGAC	GCCTGGGATAACCCTGGGAAT	ineffective-gDNA	DHS_64	-	-	0	0	0	0	0	0	0	0	2.64249	1.25247	5.82205	6.00696	0	0	0	0
+	chr6	30902916	ATGACTCACATCCAGCCCCATGG	GATGACTCACATCCAGCCCCA	regulatory-gDNA sequences	DHS_64	-	-	0	11	0	0	62	0	31	56	15.8872	1.25247	5.82205	76.8779	0	0	10.6492	0.403237
-	chr6	30902932	CCCATGGCTGTGGGTGGCTCAGT	GCCCATGGCTGTGGGTGGCTC	ineffective-gDNA	DHS_64	-	-	4	36	9	31	0	28	0	0	44.4487	36.0599	32.4976	6.00696	0.0899914	0.249585	0	0
-	chr6	30902933	CCATGGCTGTGGGTGGCTCAGTT	GCCATGGCTGTGGGTGGCTCA	ineffective-gDNA	DHS_64	-	-	295	649	435	698	899	1403	1497	1262	633.073	584.928	1170.3	1443.72	0.465981	0.743681	0.768182	1.03691
+	chr6	30902957	AGCCCAGGTGTGGTGCCGTTTGG	GAGCCCAGGTGTGGTGCCGTT	regulatory-gDNA sequences	DHS_64	-	-	1320	1202	350	783	1709	2123	2619	1807	1321.04	654.735	1742.97	2033.43	0.999211	0.534567	0.98051	1.28797
-	chr6	30902959	CCCAGGTGTGGTGCCGTTTGGTA	GCCCAGGTGTGGTGCCGTTTG	ineffective-gDNA	DHS_64	-	-	293	520	245	525	511	874	679	767	507.128	459.075	712.866	857.837	0.577763	0.533682	0.716824	0.791526
-	chr6	30902960	CCAGGTGTGGTGCCGTTTGGTAA	GCCAGGTGTGGTGCCGTTTGG	ineffective-gDNA	DHS_64	-	-	203	531	400	595	1053	1348	1192	1085	517.302	508.997	1124.2	1237.31	0.392421	0.785859	0.936665	0.963377
+	chr6	30902966	GTGGTGCCGTTTGGTAACCACGG	GTGGTGCCGTTTGGTAACCA	regulatory-gDNA sequences	DHS_64	-	-	27	51	0	0	192	70	193	95	60.299	1.25247	70.3344	123.687	0.447769	0	2.72982	1.56039
+	chr6	30902967	TGGTGCCGTTTGGTAACCACGGG	GTGGTGCCGTTTGGTAACCAC	regulatory-gDNA sequences	DHS_64	-	-	0	0	0	0	0	0	0	34	2.64249	1.25247	5.82205	49.5313	0	0	0	0
-	chr6	30902972	CCGTTTGGTAACCACGGGCCTCC	GCCGTTTGGTAACCACGGGCC	ineffective-gDNA	DHS_64	-	-	2205	2776	3634	4149	4704	5016	6941	6064	3297.43	4113.12	4022.56	6557.37	0.668703	0.883514	1.16941	1.0585
+	chr6	30902977	TGGTAACCACGGGCCTCCCTAGG	GTGGTAACCACGGGCCTCCCT	regulatory-gDNA sequences	DHS_64	-	-	27	41	22	67	0	139	61	34	49.8403	71.2125	126.252	49.5313	0.541731	0.308934	0	1.23155
-	chr6	30902993	CCCTAGGCCACAGTCCCAGGCGA	GCCCTAGGCCACAGTCCCAGG	ineffective-gDNA	DHS_64	-	-	18	22	0	0	0	127	83	24	28.6982	1.25247	117.003	36.8955	0.627217	0	0	2.24959
-	chr6	30903000	CCACAGTCCCAGGCGAAGTTAGT	GCCACAGTCCCAGGCGAAGTT	ineffective-gDNA	DHS_64	-	-	422	634	251	377	286	655	836	967	617.522	345.624	523.082	1096.93	0.683376	0.726223	0.54676	0.762125
-	chr6	30903007	CCCAGGCGAAGTTAGTAGCAAGC	GCCCAGGCGAAGTTAGTAGCA	ineffective-gDNA	DHS_64	-	-	0	0	0	0	0	0	0	0	2.64249	1.25247	5.82205	6.00696	0	0	0	0
+	chr6	30904342	ACATAGCAGATTGTTTTGCTTGG	GACATAGCAGATTGTTTTGCT	regulatory-gDNA sequences	CTCF_26	DHS_65	enhancer_9	0	18	83	203	0	83	119	43	24.0817	185.801	81.4429	60.7937	0	0.446714	0	1.95744
+	chr6	30904343	CATAGCAGATTGTTTTGCTTGGG	GCATAGCAGATTGTTTTGCTT	regulatory-gDNA sequences	CTCF_26	DHS_65	enhancer_9	0	0	0	0	0	0	0	0	2.64249	1.25247	5.82205	6.00696	0	0	0	0
+	chr6	30904344	ATAGCAGATTGTTTTGCTTGGGG	GATAGCAGATTGTTTTGCTTG	regulatory-gDNA sequences	CTCF_26	DHS_65	enhancer_9	78	118	80	152	180	216	179	82	127.243	143.564	182.94	108.318	0.613	0.557242	0.983927	1.65255
+	chr6	30904350	GATTGTTTTGCTTGGGGCTTTGG	GATTGTTTTGCTTGGGGCTT	regulatory-gDNA sequences	CTCF_26	DHS_65	enhancer_9	297	442	374	657	588	1297	1070	1115	436.689	553.949	1080.98	1272.73	0.680118	0.675152	0.543952	0.840712
+	chr6	30904360	CTTGGGGCTTTGGCTTGGTCTGG	GCTTGGGGCTTTGGCTTGGTC	regulatory-gDNA sequences	CTCF_26	DHS_65	enhancer_9	701	1127	3603	1585	1595	3067	2628	1926	1225.76	1488.33	2487.81	2160.01	0.571892	2.42084	0.641127	1.21666
+	chr6	30904361	TTGGGGCTTTGGCTTGGTCTGGG	GTTGGGGCTTTGGCTTGGTCT	regulatory-gDNA sequences	CTCF_26	DHS_65	enhancer_9	227	111	926	69	19	174	364	227	120.098	73.0426	152.447	267.719	1.89012	12.6775	0.124633	1.35963
+	chr6	30904377	GTCTGGGGCGTGCAGTTCCATGG	GTCTGGGGCGTGCAGTTCCA	regulatory-gDNA sequences	CTCF_26	DHS_65	enhancer_9	86	166	114	202	860	418	247	306	177.123	184.954	328.746	344.893	0.485538	0.61637	2.616	0.716165
+	chr6	30904389	CAGTTCCATGGGGGAACCTCTGG	GCAGTTCCATGGGGGAACCTC	regulatory-gDNA sequences	CTCF_26	DHS_65	enhancer_9	0	0	0	0	0	0	0	0	2.64249	1.25247	5.82205	6.00696	0	0	0	0
-	chr6	30904394	CCATGGGGGAACCTCTGGCAATC	GCCATGGGGGAACCTCTGGCA	ineffective-gDNA	CTCF_26	DHS_65	enhancer_9	12	59	10	15	39	152	117	162	68.4208	18.7219	136.103	199.585	0.175385	0.534133	0.286548	0.586216
+	chr6	30904402	GAACCTCTGGCAATCCCACCAGG	GAACCTCTGGCAATCCCACC	regulatory-gDNA sequences	CTCF_26	DHS_65	enhancer_9	26	38	54	68	46	15	92	24	46.6199	72.1289	20.2705	36.8955	0.557702	0.74866	2.2693	2.49353
+	chr6	30904403	AACCTCTGGCAATCCCACCAGGG	GAACCTCTGGCAATCCCACCA	regulatory-gDNA sequences	CTCF_26	DHS_65	enhancer_9	0	0	0	0	0	0	0	0	2.64249	1.25247	5.82205	6.00696	0	0	0	0
+	chr6	30904404	ACCTCTGGCAATCCCACCAGGGG	GACCTCTGGCAATCCCACCAG	regulatory-gDNA sequences	CTCF_26	DHS_65	enhancer_9	81	128	74	91	242	198	60	181	137.53	92.58	169.949	220.154	0.588961	0.799309	1.42396	0.272536
-	chr6	30904405	CCTCTGGCAATCCCACCAGGGGG	GCCTCTGGCAATCCCACCAGG	ineffective-gDNA	CTCF_26	DHS_65	enhancer_9	0	0	0	0	0	0	0	0	2.64249	1.25247	5.82205	6.00696	0	0	0	0
-	chr6	30904416	CCCACCAGGGGGAGCCCTTTCCC	GCCCACCAGGGGGAGCCCTTT	ineffective-gDNA	CTCF_26	DHS_65	enhancer_9	0	0	0	0	0	0	0	0	2.64249	1.25247	5.82205	6.00696	0	0	0	0
-	chr6	30904417	CCACCAGGGGGAGCCCTTTCCCC	GCCACCAGGGGGAGCCCTTTC	ineffective-gDNA	CTCF_26	DHS_65	enhancer_9	143	202	112	164	113	219	286	281	214.566	153.395	185.097	320.801	0.66646	0.730142	0.610491	0.891519
-	chr6	30904420	CCAGGGGGAGCCCTTTCCCCATC	GCCAGGGGGAGCCCTTTCCCC	ineffective-gDNA	CTCF_26	DHS_65	enhancer_9	88	220	77	237	652	455	435	292	232.945	215.485	357.017	331.417	0.377772	0.357334	1.82624	1.31254
+	chr6	30904424	GGGGAGCCCTTTCCCCATCTTGG	GGGGAGCCCTTTCCCCATCT	regulatory-gDNA sequences	CTCF_26	DHS_65	enhancer_9	0	0	0	0	0	0	0	0	2.64249	1.25247	5.82205	6.00696	0	0	0	0
+	chr6	30904425	GGGAGCCCTTTCCCCATCTTGGG	GGGAGCCCTTTCCCCATCTT	regulatory-gDNA sequences	CTCF_26	DHS_65	enhancer_9	49	69	14	32	231	117	252	92	78.3674	37.1036	109.163	120.16	0.62526	0.377322	2.11609	2.0972
+	chr6	30904426	GGAGCCCTTTCCCCATCTTGGGG	GGAGCCCTTTCCCCATCTTG	regulatory-gDNA sequences	CTCF_26	DHS_65	enhancer_9	65	123	97	285	297	394	202	167	132.376	261.513	310.846	205.047	0.491026	0.370919	0.955457	0.985138
-	chr6	30904430	CCCTTTCCCCATCTTGGGGCTGT	GCCCTTTCCCCATCTTGGGGC	ineffective-gDNA	CTCF_26	DHS_65	enhancer_9	0	0	0	0	0	0	0	0	2.64249	1.25247	5.82205	6.00696	0	0	0	0
-	chr6	30904431	CCTTTCCCCATCTTGGGGCTGTG	GCCTTTCCCCATCTTGGGGCT	ineffective-gDNA	CTCF_26	DHS_65	enhancer_9	134	239	139	169	455	530	560	521	251.913	157.499	417.554	569.436	0.531929	0.882548	1.08968	0.98343
-	chr6	30904437	CCCATCTTGGGGCTGTGGATCTC	GCCCATCTTGGGGCTGTGGAT	ineffective-gDNA	CTCF_26	DHS_65	enhancer_9	21	88	86	186	186	209	197	132	97.0446	171.537	177.899	166.249	0.216395	0.501348	1.04554	1.18497
-	chr6	30904438	CCATCTTGGGGCTGTGGATCTCA	GCCATCTTGGGGCTGTGGATC	ineffective-gDNA	CTCF_26	DHS_65	enhancer_9	328	592	196	570	624	525	1104	965	575.406	491.184	413.393	1094.54	0.570032	0.399036	1.50946	1.00864
+	chr6	30904610	ATGACTGTAGTTACGTAGTGTGG	GATGACTGTAGTTACGTAGTG	regulatory-gDNA sequences	CTCF_26	DHS_65	enhancer_9	63	135	12	15	131	340	34	248	144.777	18.7219	271.498	288.617	0.435151	0.640959	0.482508	0.117803
+	chr6	30904631	GGCAGCAACACAGGGCAACTTGG	GGCAGCAACACAGGGCAACT	regulatory-gDNA sequences	CTCF_26	DHS_65	enhancer_9	2	49	191	258	42	100	184	113	58.2377	234.928	95.5259	144.604	0.034342	0.813015	0.439672	1.27244
+	chr6	30904632	GCAGCAACACAGGGCAACTTGGG	GCAGCAACACAGGGCAACTT	regulatory-gDNA sequences	CTCF_26	DHS_65	enhancer_9	0	0	0	0	0	0	0	0	2.64249	1.25247	5.82205	6.00696	0	0	0	0
+	chr6	30904633	CAGCAACACAGGGCAACTTGGGG	GCAGCAACACAGGGCAACTTG	regulatory-gDNA sequences	CTCF_26	DHS_65	enhancer_9	6	45	136	226	117	140	39	231	54.0713	205.671	127.016	271.732	0.110965	0.66125	0.921145	0.143524
+	chr6	30904637	AACACAGGGCAACTTGGGGCTGG	GAACACAGGGCAACTTGGGGC	regulatory-gDNA sequences	CTCF_26	DHS_65	enhancer_9	2468	1150	1449	2225	1857	2777	2539	2310	1254.99	2153.2	2259.1	2568.41	1.96655	0.672953	0.82201	0.98855
-	chr6	30904681	CCTCCCCAAATGCAGTCATTTAG	GCCTCCCCAAATGCAGTCATT	ineffective-gDNA	CTCF_26	DHS_65	enhancer_9	179	381	346	552	701	674	429	649	382.518	478.372	539.342	718.118	0.467952	0.723286	1.29973	0.597395
-	chr6	30904686	CCAAATGCAGTCATTTAGCATCT	GCCAAATGCAGTCATTTAGCA	ineffective-gDNA	CTCF_26	DHS_65	enhancer_9	5	21	0	0	0	0	0	43	27.5481	1.25247	5.82205	60.7937	0.181501	0	0	0
-	chr6	30904710	CCTCTTTCAGAGTCCTGTATCCC	GCCTCTTTCAGAGTCCTGTAT	ineffective-gDNA	CTCF_26	DHS_65	enhancer_9	0	0	0	0	0	0	0	0	2.64249	1.25247	5.82205	6.00696	0	0	0	0
-	chr6	30904730	CCCAGCGATGGGGATCAAGATTC	GCCCAGCGATGGGGATCAAGA	ineffective-gDNA	CTCF_26	DHS_65	enhancer_9	21	39	0	0	0	58	0	32	47.6981	1.25247	59.793	47.0146	0.44027	0	0	0
-	chr6	30904731	CCAGCGATGGGGATCAAGATTCA	GCCAGCGATGGGGATCAAGAT	ineffective-gDNA	CTCF_26	DHS_65	enhancer_9	0	0	0	0	0	0	0	0	2.64249	1.25247	5.82205	6.00696	0	0	0	0
+	chr6	30904740	GGGATCAAGATTCAGACTTAAGG	GGGATCAAGATTCAGACTTA	regulatory-gDNA sequences	CTCF_26	DHS_65	enhancer_9	0	0	0	0	0	0	0	0	2.64249	1.25247	5.82205	6.00696	0	0	0	0
+	chr6	30904753	AGACTTAAGGACACCCTACCTGG	GAGACTTAAGGACACCCTACC	regulatory-gDNA sequences	CTCF_26	DHS_65	enhancer_9	0	0	0	0	0	0	0	0	2.64249	1.25247	5.82205	6.00696	0	0	0	0
+	chr6	30904760	AGGACACCCTACCTGGACCTTGG	GAGGACACCCTACCTGGACCT	regulatory-gDNA sequences	CTCF_26	DHS_65	enhancer_9	631	46	37	65	352	53	1047	239	55.1187	69.3718	55.3251	279.71	11.448	0.533358	6.36239	3.74316
+	chr6	30904765	ACCCTACCTGGACCTTGGCAAGG	GACCCTACCTGGACCTTGGCA	regulatory-gDNA sequences	CTCF_26	DHS_65	enhancer_9	121	220	17	34	263	481	709	594	232.945	39.1779	377.471	653.778	0.519436	0.433919	0.696742	1.08447
-	chr6	30904777	CCTTGGCAAGGAGATTTTTACAG	GCCTTGGCAAGGAGATTTTTA	ineffective-gDNA	CTCF_26	DHS_65	enhancer_9	0	0	0	0	0	0	0	0	2.64249	1.25247	5.82205	6.00696	0	0	0	0
+	chr6	30904780	TGGCAAGGAGATTTTTACAGTGG	GTGGCAAGGAGATTTTTACAG	regulatory-gDNA sequences	CTCF_26	DHS_65	enhancer_9	0	0	0	0	0	0	0	0	2.64249	1.25247	5.82205	6.00696	0	0	0	0
+	chr6	30904788	AGATTTTTACAGTGGGAATCTGG	GAGATTTTTACAGTGGGAATC	regulatory-gDNA sequences	CTCF_26	DHS_65	enhancer_9	0	0	0	0	0	0	0	0	2.64249	1.25247	5.82205	6.00696	0	0	0	0
+	chr6	30905579	ATTCCTGTGGGTGTGTGTCTGGG	GATTCCTGTGGGTGTGTGTCT	regulatory-gDNA sequences	CTCF_27	DHS_66	-	38	56	27	85	315	334	127	381	65.3961	87.3452	267.185	417.791	0.581074	0.309118	1.17896	0.30398
+	chr6	30910694	CAACTCACTTTGCCGGGTTG	GCAACTCACTTTGCCGGGTTG	control-gDNA sequences	-	-	-	74841	72927	57668	77071	112637	145591	146118	134287	75390.2	58068.5	112268	146398	0.992716	0.993102	1.00329	0.998086
+	chr6	30910922	TGGATTATGCGCAAACACCT	GTGGATTATGCGCAAACACCT	control-gDNA sequences	-	-	-	0	0	0	0	0	0	0	0	2.64249	1.25247	5.82205	6.00696	0	0	0	0
+	chr6	30914192	ACAAGAAAAGGCCTCTGGTACGG	GACAAGAAAAGGCCTCTGGTA	regulatory-gDNA sequences	DHS_67	-	-	0	0	0	0	0	0	0	0	2.64249	1.25247	5.82205	6.00696	0	0	0	0
-	chr6	30914203	CCTCTGGTACGGTCCTGTCTTGG	GCCTCTGGTACGGTCCTGTCT	ineffective-gDNA	DHS_67	-	-	144	267	48	61	175	338	485	131	278.806	65.6566	270.059	165.121	0.516487	0.731076	0.648005	2.93724
-	chr6	30914216	CCTGTCTTGGACAGTTTCCCCGG	GCCTGTCTTGGACAGTTTCCC	ineffective-gDNA	DHS_67	-	-	182	346	133	289	472	843	862	568	351.263	265.485	685.764	623.588	0.51813	0.500969	0.688284	1.38232
+	chr6	30914228	AGTTTCCCCGGCCACCCAGCAGG	GAGTTTCCCCGGCCACCCAGC	regulatory-gDNA sequences	DHS_67	-	-	52	59	41	32	91	135	81	87	68.4208	37.1036	123.187	114.256	0.760003	1.10501	0.738716	0.708936
-	chr6	30914235	CCGGCCACCCAGCAGGCTGCCTA	GCCGGCCACCCAGCAGGCTGC	ineffective-gDNA	DHS_67	-	-	1551	2114	1604	2263	2966	5368	4528	4316	2471.57	2192.47	4299.31	4700.74	0.627535	0.731596	0.689878	0.963252
-	chr6	30914242	CCCAGCAGGCTGCCTATTGTGCT	GCCCAGCAGGCTGCCTATTGT	ineffective-gDNA	DHS_67	-	-	103	289	179	344	478	357	520	360	299.356	317.073	283.773	397.095	0.344072	0.564539	1.68444	1.30951
-	chr6	30914243	CCAGCAGGCTGCCTATTGTGCTG	GCCAGCAGGCTGCCTATTGTG	ineffective-gDNA	DHS_67	-	-	824	1639	785	1141	2570	3006	2050	1769	1874.21	1023.21	2439.71	1993.01	0.439652	0.767197	1.05341	1.02859
-	chr6	30914254	CCTATTGTGCTGTTTGAGATGCA	GCCTATTGTGCTGTTTGAGAT	ineffective-gDNA	DHS_67	-	-	0	0	0	0	0	0	0	0	2.64249	1.25247	5.82205	6.00696	0	0	0	0
+	chr6	30914275	CAAATGATCTCTTCTTATGCTGG	GCAAATGATCTCTTCTTATGC	regulatory-gDNA sequences	DHS_67	-	-	0	0	0	0	0	0	0	0	2.64249	1.25247	5.82205	6.00696	0	0	0	0
+	chr6	30914288	CTTATGCTGGGGAACCTTCTAGG	GCTTATGCTGGGGAACCTTCT	regulatory-gDNA sequences	DHS_67	-	-	0	9	0	0	0	26	0	0	13.5151	1.25247	30.6334	6.00696	0	0	0	0
+	chr6	30914293	GCTGGGGAACCTTCTAGGCATGG	GCTGGGGAACCTTCTAGGCA	regulatory-gDNA sequences	DHS_67	-	-	0	0	0	0	0	0	0	0	2.64249	1.25247	5.82205	6.00696	0	0	0	0
+	chr6	30914297	GGGAACCTTCTAGGCATGGCAGG	GGGAACCTTCTAGGCATGGC	regulatory-gDNA sequences	DHS_67	-	-	2840	2740	4480	3347	4861	5785	5605	4299	3252.71	3303.14	4627	4682.68	0.873117	1.35628	1.05057	1.19696
+	chr6	30914298	GGAACCTTCTAGGCATGGCAGGG	GGAACCTTCTAGGCATGGCA	regulatory-gDNA sequences	DHS_67	-	-	231	439	201	260	869	890	528	499	434.019	236.835	726.872	544.292	0.532235	0.848693	1.19553	0.970067
+	chr6	30914299	GAACCTTCTAGGCATGGCAGGGG	GAACCTTCTAGGCATGGCAG	regulatory-gDNA sequences	DHS_67	-	-	723	148	83	110	377	185	527	397	158.308	108.818	160.501	433.823	4.56704	0.762745	2.34889	1.21478
+	chr6	30915578	CTCAGCCGGTATCCAGTCCA	GCTCAGCCGGTATCCAGTCCA	control-gDNA sequences	-	-	-	122	317	347	622	942	601	476	667	325.058	528.379	477.163	739.3	0.375318	0.656726	1.97417	0.643853
-	chr6	30918830	AATGTACCATTCGGACTAGT	GAATGTACCATTCGGACTAGT	control-gDNA sequences	-	-	-	0	0	0	0	0	0	0	0	2.64249	1.25247	5.82205	6.00696	0	0	0	0
-	chr6	30918831	CAATGTACCATTCGGACTAG	GCAATGTACCATTCGGACTAG	control-gDNA sequences	-	-	-	0	0	0	0	0	0	0	0	2.64249	1.25247	5.82205	6.00696	0	0	0	0
+	chr6	30918832	TAGTCCGAATGGTACATTGT	GTAGTCCGAATGGTACATTGT	control-gDNA sequences	-	-	-	0	0	0	0	0	0	0	0	2.64249	1.25247	5.82205	6.00696	0	0	0	0
-	chr6	30919923	CCTACTGCACTTCTTCCTTATAT	GCCTACTGCACTTCTTCCTTA	ineffective-gDNA	CTCF_28	DHS_68	enhancer_10	0	0	0	0	0	0	0	0	2.64249	1.25247	5.82205	6.00696	0	0	0	0
+	chr6	30919929	GCACTTCTTCCTTATATGCTTGG	GCACTTCTTCCTTATATGCT	regulatory-gDNA sequences	CTCF_28	DHS_68	enhancer_10	0	0	0	0	0	0	0	0	2.64249	1.25247	5.82205	6.00696	0	0	0	0
-	chr6	30919938	CCTTATATGCTTGGAGTGTGTGG	GCCTTATATGCTTGGAGTGTG	ineffective-gDNA	CTCF_28	DHS_68	enhancer_10	1171	902	623	938	1947	2014	2805	1748	939.28	809.483	1656.9	1970.67	1.2467	0.769627	1.17508	1.42337
+	chr6	30919958	TGGAATGCTGCTCACCACTCTGG	GTGGAATGCTGCTCACCACTC	regulatory-gDNA sequences	CTCF_28	DHS_68	enhancer_10	8	24	0	0	0	16	47	23	30.991	1.25247	21.2205	35.6247	0.25814	0	0	1.31931
+	chr6	30919959	GGAATGCTGCTCACCACTCTGGG	GGAATGCTGCTCACCACTCT	regulatory-gDNA sequences	CTCF_28	DHS_68	enhancer_10	1	6	318	9	0	0	0	0	9.92841	11.8852	5.82205	6.00696	0.100721	26.7559	0	0
+	chr6	30919967	GCTCACCACTCTGGGGCAGTTGG	GCTCACCACTCTGGGGCAGT	regulatory-gDNA sequences	CTCF_28	DHS_68	enhancer_10	765	279	82	232	615	1198	651	729	290.058	210.996	995.991	812.644	2.6374	0.388634	0.617476	0.801089
+	chr6	30919991	GACTGAGATAACTCCCTCCCTGG	GACTGAGATAACTCCCTCCC	regulatory-gDNA sequences	CTCF_28	DHS_68	enhancer_10	8	46	0	0	35	98	31	41	55.1187	1.25247	93.8934	58.2996	0.145141	0	0.372763	0.531736
+	chr6	30920000	AACTCCCTCCCTGGAATGTAGGG	GAACTCCCTCCCTGGAATGTA	regulatory-gDNA sequences	CTCF_28	DHS_68	enhancer_10	47	90	41	64	139	117	169	82	99.0199	68.4473	109.163	108.318	0.474652	0.599001	1.27332	1.56023
-	chr6	30920004	CCCTCCCTGGAATGTAGGGAATT	GCCCTCCCTGGAATGTAGGGA	ineffective-gDNA	CTCF_28	DHS_68	enhancer_10	0	0	0	0	0	0	0	0	2.64249	1.25247	5.82205	6.00696	0	0	0	0
-	chr6	30920005	CCTCCCTGGAATGTAGGGAATTT	GCCTCCCTGGAATGTAGGGAA	ineffective-gDNA	CTCF_28	DHS_68	enhancer_10	0	0	0	0	0	0	0	0	2.64249	1.25247	5.82205	6.00696	0	0	0	0
-	chr6	30920009	CCTGGAATGTAGGGAATTTGGTG	GCCTGGAATGTAGGGAATTTG	ineffective-gDNA	CTCF_28	DHS_68	enhancer_10	10	46	8	11	58	34	46	0	55.1187	14.1857	38.0549	6.00696	0.181427	0.563946	1.52411	7.65779
+	chr6	30920067	GTACCTTGCAGCAGCACAGCTGG	GTACCTTGCAGCAGCACAGC	regulatory-gDNA sequences	CTCF_28	DHS_68	enhancer_10	0	0	0	0	0	0	0	0	2.64249	1.25247	5.82205	6.00696	0	0	0	0
+	chr6	30920068	TACCTTGCAGCAGCACAGCTGGG	GTACCTTGCAGCAGCACAGCT	regulatory-gDNA sequences	CTCF_28	DHS_68	enhancer_10	0	0	0	0	0	0	0	0	2.64249	1.25247	5.82205	6.00696	0	0	0	0
-	chr6	30920070	CCTTGCAGCAGCACAGCTGGGTT	GCCTTGCAGCAGCACAGCTGG	ineffective-gDNA	CTCF_28	DHS_68	enhancer_10	0	0	0	0	0	0	0	0	2.64249	1.25247	5.82205	6.00696	0	0	0	0
+	chr6	30920078	CAGCACAGCTGGGTTCTGGATGG	GCAGCACAGCTGGGTTCTGGA	regulatory-gDNA sequences	CTCF_28	DHS_68	enhancer_10	0	0	0	0	0	0	0	0	2.64249	1.25247	5.82205	6.00696	0	0	0	0
+	chr6	30920079	AGCACAGCTGGGTTCTGGATGGG	GAGCACAGCTGGGTTCTGGAT	regulatory-gDNA sequences	CTCF_28	DHS_68	enhancer_10	0	0	0	0	0	0	0	0	2.64249	1.25247	5.82205	6.00696	0	0	0	0
+	chr6	30920100	GGCTCCATCTCTGAAAGAGAGGG	GGCTCCATCTCTGAAAGAGA	regulatory-gDNA sequences	CTCF_28	DHS_68	enhancer_10	0	0	0	0	0	0	0	0	2.64249	1.25247	5.82205	6.00696	0	0	0	0
+	chr6	30920101	GCTCCATCTCTGAAAGAGAGGGG	GCTCCATCTCTGAAAGAGAG	regulatory-gDNA sequences	CTCF_28	DHS_68	enhancer_10	0	0	0	0	0	0	0	0	2.64249	1.25247	5.82205	6.00696	0	0	0	0
-	chr6	30920104	CCATCTCTGAAAGAGAGGGGCAA	GCCATCTCTGAAAGAGAGGGG	ineffective-gDNA	CTCF_28	DHS_68	enhancer_10	0	0	0	0	0	0	0	0	2.64249	1.25247	5.82205	6.00696	0	0	0	0
+	chr6	30920108	CTCTGAAAGAGAGGGGCAAAAGG	GCTCTGAAAGAGAGGGGCAAA	regulatory-gDNA sequences	CTCF_28	DHS_68	enhancer_10	0	0	0	0	0	0	0	0	2.64249	1.25247	5.82205	6.00696	0	0	0	0
+	chr6	30920114	AAGAGAGGGGCAAAAGGGTTGGG	GAAGAGAGGGGCAAAAGGGTT	regulatory-gDNA sequences	CTCF_28	DHS_68	enhancer_10	0	0	0	0	0	0	0	0	2.64249	1.25247	5.82205	6.00696	0	0	0	0
+	chr6	30920120	GGGGCAAAAGGGTTGGGGAAGGG	GGGGCAAAAGGGTTGGGGAA	regulatory-gDNA sequences	CTCF_28	DHS_68	enhancer_10	0	0	0	0	0	0	0	0	2.64249	1.25247	5.82205	6.00696	0	0	0	0
+	chr6	30920121	GGGCAAAAGGGTTGGGGAAGGGG	GGGCAAAAGGGTTGGGGAAG	regulatory-gDNA sequences	CTCF_28	DHS_68	enhancer_10	0	0	0	0	0	0	0	0	2.64249	1.25247	5.82205	6.00696	0	0	0	0
+	chr6	30920143	GTAGCTGCCGGTCTTAGTGAAGG	GTAGCTGCCGGTCTTAGTGA	regulatory-gDNA sequences	CTCF_28	DHS_68	enhancer_10	0	0	0	0	0	0	0	0	2.64249	1.25247	5.82205	6.00696	0	0	0	0
+	chr6	30920144	TAGCTGCCGGTCTTAGTGAAGGG	GTAGCTGCCGGTCTTAGTGAA	regulatory-gDNA sequences	CTCF_28	DHS_68	enhancer_10	0	0	0	0	0	0	0	0	2.64249	1.25247	5.82205	6.00696	0	0	0	0
-	chr6	30920150	CCGGTCTTAGTGAAGGGTCCCCG	GCCGGTCTTAGTGAAGGGTCC	ineffective-gDNA	CTCF_28	DHS_68	enhancer_10	1294	1535	1382	2336	3241	2648	2633	3035	1742.88	2267.85	2157.33	3339.28	0.742451	0.609389	1.50232	0.788493
+	chr6	30920153	GTCTTAGTGAAGGGTCCCCGAGG	GTCTTAGTGAAGGGTCCCCG	regulatory-gDNA sequences	CTCF_28	DHS_68	enhancer_10	15	11	0	0	66	49	0	6	15.8872	1.25247	51.7286	13.807	0.944156	0	1.27589	0
-	chr6	30920168	CCCCGAGGCACTAGCGTGTCCTC	GCCCCGAGGCACTAGCGTGTC	ineffective-gDNA	CTCF_28	DHS_68	enhancer_10	144	258	138	250	137	413	339	415	270.295	227.401	324.991	452.202	0.532752	0.606857	0.42155	0.749666
-	chr6	30920169	CCCGAGGCACTAGCGTGTCCTCA	GCCCGAGGCACTAGCGTGTCC	ineffective-gDNA	CTCF_28	DHS_68	enhancer_10	2657	1917	1082	2143	2715	2712	2764	3566	2224.31	2068.38	2207.82	3903.73	1.19453	0.523116	1.22972	0.708042
-	chr6	30920170	CCGAGGCACTAGCGTGTCCTCAC	GCCGAGGCACTAGCGTGTCCT	ineffective-gDNA	CTCF_28	DHS_68	enhancer_10	402	873	247	583	1022	1480	1047	1139	902.289	500.438	1233.78	1300.96	0.445534	0.493567	0.828348	0.804793
+	chr6	30921133	TGTGTCATGTTCCACACACGTGG	GTGTGTCATGTTCCACACACG	regulatory-gDNA sequences	DHS_69	-	-	27	45	32	20	0	102	95	117	54.0713	24.2747	97.1522	149.197	0.49934	1.31825	0	0.636741
+	chr6	30921134	GTGTCATGTTCCACACACGTGGG	GTGTCATGTTCCACACACGT	regulatory-gDNA sequences	DHS_69	-	-	31	65	6	46	0	100	18	40	74.4094	51.2757	95.5259	57.0508	0.416614	0.117014	0	0.315509
-	chr6	30923411	CCAGGTAAATCTGCCCTCCCTCA	GCCAGGTAAATCTGCCCTCCC	ineffective-gDNA	DHS_70	-	-	224	476	149	217	447	589	758	838	467.101	197.802	467.024	942.602	0.479554	0.75328	0.957124	0.804157
-	chr6	30923441	CCTTTATGAAATCACCCAAATGG	GCCTTTATGAAATCACCCAAA	ineffective-gDNA	DHS_70	-	-	0	0	0	0	0	0	0	0	2.64249	1.25247	5.82205	6.00696	0	0	0	0
-	chr6	30923950	CCACCGAATTGAACGCAATCTCT	GCCACCGAATTGAACGCAATC	ineffective-gDNA	DHS_71	-	-	0	0	0	0	0	0	0	0	2.64249	1.25247	5.82205	6.00696	0	0	0	0
-	chr6	30923953	CCGAATTGAACGCAATCTCTAGT	GCCGAATTGAACGCAATCTCT	ineffective-gDNA	DHS_71	-	-	0	0	0	0	0	0	0	0	2.64249	1.25247	5.82205	6.00696	0	0	0	0
+	chr6	30923973	AGTCCTCCCACCCTCCGTCGAGG	GAGTCCTCCCACCCTCCGTCG	regulatory-gDNA sequences	DHS_71	-	-	205	455	417	344	968	806	1042	688	448.28	317.073	653.489	764.079	0.457303	1.31515	1.48128	1.36373
-	chr6	30923976	CCTCCCACCCTCCGTCGAGGTTG	GCCTCCCACCCTCCGTCGAGG	ineffective-gDNA	DHS_71	-	-	19	14	12	60	150	24	65	50	19.4187	64.7205	28.7632	69.484	0.978439	0.185413	5.215	0.935467
+	chr6	30923977	CTCCCACCCTCCGTCGAGGTTGG	GCTCCCACCCTCCGTCGAGGT	regulatory-gDNA sequences	DHS_71	-	-	0	8	0	0	0	23	0	29	12.3235	1.25247	27.8258	43.2298	0	0	0	0
+	chr6	30923978	TCCCACCCTCCGTCGAGGTTGGG	GTCCCACCCTCCGTCGAGGTT	regulatory-gDNA sequences	DHS_71	-	-	10	49	0	0	82	51	148	63	58.2377	1.25247	53.5294	85.4372	0.17171	0	1.53187	1.73227
-	chr6	30923979	CCCACCCTCCGTCGAGGTTGGGC	GCCCACCCTCCGTCGAGGTTG	ineffective-gDNA	DHS_71	-	-	4669	5369	3064	5566	7184	10891	10641	10500	6459.81	5520.34	8625.11	11263.7	0.722776	0.555039	0.832917	0.944715
-	chr6	30923980	CCACCCTCCGTCGAGGTTGGGCT	GCCACCCTCCGTCGAGGTTGG	ineffective-gDNA	DHS_71	-	-	7430	10990	8673	11102	16310	18799	20451	18889	12952.2	10742.2	14769.1	20148.3	0.573648	0.807373	1.10433	1.01502
+	chr6	30923982	ACCCTCCGTCGAGGTTGGGCTGG	GACCCTCCGTCGAGGTTGGGC	regulatory-gDNA sequences	DHS_71	-	-	1717	1743	1041	1429	2644	3680	3357	2934	2005.35	1325.27	2970.96	3231.91	0.856211	0.785501	0.889949	1.03871
-	chr6	30923983	CCCTCCGTCGAGGTTGGGCTGGC	GCCCTCCGTCGAGGTTGGGCT	ineffective-gDNA	DHS_71	-	-	137	361	433	566	496	803	775	956	364.696	488.338	650.876	1083.79	0.375656	0.886682	0.762049	0.715085
-	chr6	30923984	CCTCCGTCGAGGTTGGGCTGGCT	GCCTCCGTCGAGGTTGGGCTG	ineffective-gDNA	DHS_71	-	-	537	1210	801	1200	1202	2380	1698	1977	1331.2	1085.2	1945.85	2214.25	0.403396	0.738116	0.617726	0.76685
-	chr6	30923987	CCGTCGAGGTTGGGCTGGCTCTA	GCCGTCGAGGTTGGGCTGGCT	ineffective-gDNA	DHS_71	-	-	2178	3286	1575	2645	3966	6611	5971	6603	3928.43	2585.98	5275.55	7129.61	0.55442	0.609054	0.751769	0.837493
-	chr6	30924013	CCCAATCCTTTTATTATGTGATC	GCCCAATCCTTTTATTATGTG	ineffective-gDNA	DHS_71	-	-	0	0	0	0	0	0	0	0	2.64249	1.25247	5.82205	6.00696	0	0	0	0
-	chr6	30924046	CCAACCTCCCATCGTGAGTTCTC	GCCAACCTCCCATCGTGAGTT	ineffective-gDNA	DHS_71	-	-	1645	1052	757	1593	1000	1656	1416	1560	1130.37	1496.68	1374.13	1770.69	1.45528	0.505787	0.727731	0.79969
-	chr6	30924050	CCTCCCATCGTGAGTTCTCTCTT	GCCTCCCATCGTGAGTTCTCT	ineffective-gDNA	DHS_71	-	-	0	0	0	0	0	0	0	0	2.64249	1.25247	5.82205	6.00696	0	0	0	0
-	chr6	30924054	CCATCGTGAGTTCTCTCTTAGCA	GCCATCGTGAGTTCTCTCTTA	ineffective-gDNA	DHS_71	-	-	0	0	0	0	0	0	0	0	2.64249	1.25247	5.82205	6.00696	0	0	0	0
+	chr6	30924064	TTCTCTCTTAGCATAAGCCCAGG	GTTCTCTCTTAGCATAAGCCC	regulatory-gDNA sequences	DHS_71	-	-	0	0	0	0	0	0	0	0	2.64249	1.25247	5.82205	6.00696	0	0	0	0
+	chr6	30925201	ATTTCTTGTCAAAAGTATACTGG	GATTTCTTGTCAAAAGTATAC	regulatory-gDNA sequences	enhancer_11	-	-	0	0	0	0	0	0	0	0	2.64249	1.25247	5.82205	6.00696	0	0	0	0
+	chr6	30925259	TATCCCTATAGTAAAGACAATGG	GTATCCCTATAGTAAAGACAA	regulatory-gDNA sequences	enhancer_11	-	-	0	0	0	0	0	0	0	0	2.64249	1.25247	5.82205	6.00696	0	0	0	0
-	chr6	30925262	CCCTATAGTAAAGACAATGGTGA	GCCCTATAGTAAAGACAATGG	ineffective-gDNA	enhancer_11	-	-	0	0	0	0	0	0	0	0	2.64249	1.25247	5.82205	6.00696	0	0	0	0
-	chr6	30925263	CCTATAGTAAAGACAATGGTGAA	GCCTATAGTAAAGACAATGGT	ineffective-gDNA	enhancer_11	-	-	0	0	0	0	0	0	0	0	2.64249	1.25247	5.82205	6.00696	0	0	0	0
-	chr6	30925346	CCGTGAGTATATAATGAGTCTTG	GCCGTGAGTATATAATGAGTC	ineffective-gDNA	enhancer_11	-	-	0	0	0	0	0	0	0	0	2.64249	1.25247	5.82205	6.00696	0	0	0	0
+	chr6	30931048	GCCACGCTCAATGGGAATTG	GCCACGCTCAATGGGAATTG	control-gDNA sequences	-	-	-	0	4	41	135	129	74	11	44	7.51709	129.614	73.7857	62.0388	0	0.316324	1.74831	0.177308
+	chr6	30931048	CAATTCCCATTGAGCGTGGC	GCAATTCCCATTGAGCGTGGC	control-gDNA sequences	-	-	-	2425	1877	947	1613	2585	3726	2749	3258	2174.02	1517.55	3007.2	3576.34	1.11544	0.624031	0.859605	0.768662
+	chr6	30932024	TCCAGTGCCCCCGGCAATTG	GTCCAGTGCCCCCGGCAATTG	control-gDNA sequences	-	-	-	71	168	186	278	192	236	254	273	179.215	254.484	197.281	313.053	0.396173	0.73089	0.973233	0.811365
-	chr6	30938328	GTAACTCCAGGCGATAGAGC	GTAACTCCAGGCGATAGAGC	control-gDNA sequences	-	-	-	0	0	0	0	0	0	0	0	2.64249	1.25247	5.82205	6.00696	0	0	0	0
+	chr6	30938410	CTACGCCTGACAGTCATCCG	GCTACGCCTGACAGTCATCCG	control-gDNA sequences	-	-	-	156	348	372	608	822	871	706	473	353.058	518.302	710.241	514.76	0.441854	0.717728	1.15735	1.37151
+	chr6	30941516	GGCCTATTCAGTTTGCGCCT	GGCCTATTCAGTTTGCGCCT	control-gDNA sequences	-	-	-	2002	1746	976	1605	2345	3740	2249	2828	2009.13	1509.2	3018.23	3119.21	0.996453	0.646699	0.776947	0.721016
-	chr6	30951475	GACACACGCGAGGAGTCGCG	GACACACGCGAGGAGTCGCG	control-gDNA sequences	-	-	-	568	920	636	1280	1553	1639	1836	1551	962.232	1169.16	1360.7	1761.11	0.590294	0.54398	1.14132	1.04252
-	chr6	30952080	CCAAGACAATTAAAGCTATAAAT	GCCAAGACAATTAAAGCTATA	ineffective-gDNA	enhancer_12	-	-	0	0	0	0	0	0	0	0	2.64249	1.25247	5.82205	6.00696	0	0	0	0
+	chr6	30952113	AAATGCAGGTACTCACAAGCAGG	GAAATGCAGGTACTCACAAGC	regulatory-gDNA sequences	enhancer_12	-	-	0	0	0	0	0	0	0	0	2.64249	1.25247	5.82205	6.00696	0	0	0	0
+	chr6	30952114	AATGCAGGTACTCACAAGCAGGG	GAATGCAGGTACTCACAAGCA	regulatory-gDNA sequences	enhancer_12	-	-	0	0	0	0	0	0	0	0	2.64249	1.25247	5.82205	6.00696	0	0	0	0
+	chr6	30952119	AGGTACTCACAAGCAGGGCCAGG	GAGGTACTCACAAGCAGGGCC	regulatory-gDNA sequences	enhancer_12	-	-	88	238	218	133	718	364	468	591	250.928	127.966	288.854	650.287	0.350698	1.70357	2.48568	0.719683
-	chr6	30952137	CCAGGATCAGTTACAAATGACCC	GCCAGGATCAGTTACAAATGA	ineffective-gDNA	enhancer_12	-	-	0	0	0	0	0	0	0	0	2.64249	1.25247	5.82205	6.00696	0	0	0	0
+	chr6	30952208	TGGAACTTAATAGTTTTCACAGG	GTGGAACTTAATAGTTTTCAC	regulatory-gDNA sequences	enhancer_12	-	-	0	0	0	0	0	0	0	0	2.64249	1.25247	5.82205	6.00696	0	0	0	0
+	chr6	30952226	ACAGGTATTCACGAGTCCTCAGG	GACAGGTATTCACGAGTCCTC	regulatory-gDNA sequences	enhancer_12	-	-	0	0	0	0	0	0	0	0	2.64249	1.25247	5.82205	6.00696	0	0	0	0
-	chr6	30952259	CCTCAGTTTGAGAACACTATCCT	GCCTCAGTTTGAGAACACTAT	ineffective-gDNA	enhancer_12	-	-	0	0	0	0	0	0	0	0	2.64249	1.25247	5.82205	6.00696	0	0	0	0
-	chr6	30952279	CCTAGCACTGACCTTGACTTCCA	GCCTAGCACTGACCTTGACTT	ineffective-gDNA	enhancer_12	-	-	44	90	228	315	561	663	400	424	99.0199	290.552	529.922	461.55	0.444355	0.784714	1.05865	0.866645
+	chr6	30952282	AGCACTGACCTTGACTTCCAGGG	GAGCACTGACCTTGACTTCCA	regulatory-gDNA sequences	enhancer_12	-	-	0	0	0	0	0	0	0	0	2.64249	1.25247	5.82205	6.00696	0	0	0	0
-	chr6	30952290	CCTTGACTTCCAGGGTGACCTTG	GCCTTGACTTCCAGGGTGACC	ineffective-gDNA	enhancer_12	-	-	2066	3208	1864	3338	5548	7041	5179	5532	3832.21	3294	5612.9	5992.45	0.539114	0.565878	0.988437	0.864255
-	chr6	30953558	CCCTGCCCAAGCCTGAATCTCTT	GCCCTGCCCAAGCCTGAATCT	ineffective-gDNA	CTCF_29	DHS_72	enhancer_13	0	0	0	0	0	0	0	0	2.64249	1.25247	5.82205	6.00696	0	0	0	0
-	chr6	30953569	CCTGAATCTCTTTCCTGGCCGCT	GCCTGAATCTCTTTCCTGGCC	ineffective-gDNA	CTCF_29	DHS_72	enhancer_13	155	224	147	258	91	314	461	266	236.98	234.928	252.862	306.249	0.654064	0.625724	0.359879	1.50531
-	chr6	30953582	CCTGGCCGCTTTCACTTTCCTTC	GCCTGGCCGCTTTCACTTTCC	ineffective-gDNA	CTCF_29	DHS_72	enhancer_13	30	168	71	85	375	301	236	127	179.215	87.3452	243.588	160.595	0.167397	0.812866	1.53949	1.46953
-	chr6	30953587	CCGCTTTCACTTTCCTTCCATTT	GCCGCTTTCACTTTCCTTCCA	ineffective-gDNA	CTCF_29	DHS_72	enhancer_13	0	0	0	0	0	0	0	0	2.64249	1.25247	5.82205	6.00696	0	0	0	0
+	chr6	30953599	TCCTTCCATTTTCCAGTAATTGG	GTCCTTCCATTTTCCAGTAAT	regulatory-gDNA sequences	CTCF_29	DHS_72	enhancer_13	0	0	0	0	0	0	0	0	2.64249	1.25247	5.82205	6.00696	0	0	0	0
-	chr6	30953600	CCTTCCATTTTCCAGTAATTGGA	GCCTTCCATTTTCCAGTAATT	ineffective-gDNA	CTCF_29	DHS_72	enhancer_13	0	0	0	0	0	0	0	0	2.64249	1.25247	5.82205	6.00696	0	0	0	0
-	chr6	30953604	CCATTTTCCAGTAATTGGAGTTG	GCCATTTTCCAGTAATTGGAG	ineffective-gDNA	CTCF_29	DHS_72	enhancer_13	0	0	0	0	0	0	0	0	2.64249	1.25247	5.82205	6.00696	0	0	0	0
+	chr6	30953605	CATTTTCCAGTAATTGGAGTTGG	GCATTTTCCAGTAATTGGAGT	regulatory-gDNA sequences	CTCF_29	DHS_72	enhancer_13	0	0	0	0	0	0	0	0	2.64249	1.25247	5.82205	6.00696	0	0	0	0
-	chr6	30953611	CCAGTAATTGGAGTTGGTCACCT	GCCAGTAATTGGAGTTGGTCA	ineffective-gDNA	CTCF_29	DHS_72	enhancer_13	30	71	88	119	135	153	378	128	80.3389	116.362	136.854	161.728	0.373418	0.756259	0.986453	2.33725
-	chr6	30953631	CCTGTGCAGCAAGCGCCCCCAAG	GCCTGTGCAGCAAGCGCCCCC	ineffective-gDNA	CTCF_29	DHS_72	enhancer_13	114	174	91	180	125	219	92	515	185.486	166.563	185.097	562.565	0.614601	0.54634	0.675321	0.163537
+	chr6	30953634	GTGCAGCAAGCGCCCCCAAGTGG	GTGCAGCAAGCGCCCCCAAG	regulatory-gDNA sequences	CTCF_29	DHS_72	enhancer_13	0	0	0	0	0	0	0	0	2.64249	1.25247	5.82205	6.00696	0	0	0	0
-	chr6	30953646	CCCCCAAGTGGCCTTCCTGTTCA	GCCCCCAAGTGGCCTTCCTGT	ineffective-gDNA	CTCF_29	DHS_72	enhancer_13	172	375	494	785	456	769	853	691	377.18	656.495	621.317	767.625	0.456016	0.752481	0.733925	1.11122
-	chr6	30953647	CCCCAAGTGGCCTTCCTGTTCAC	GCCCCAAGTGGCCTTCCTGTT	ineffective-gDNA	CTCF_29	DHS_72	enhancer_13	151	194	40	94	99	304	255	140	206.304	95.1765	245.726	175.236	0.73193	0.420272	0.402888	1.45518
-	chr6	30953648	CCCAAGTGGCCTTCCTGTTCACT	GCCCAAGTGGCCTTCCTGTTC	ineffective-gDNA	CTCF_29	DHS_72	enhancer_13	166	359	357	801	627	473	839	707	362.909	670.804	371.121	786.556	0.457416	0.532198	1.68948	1.06668
-	chr6	30953649	CCAAGTGGCCTTCCTGTTCACTG	GCCAAGTGGCCTTCCTGTTCA	ineffective-gDNA	CTCF_29	DHS_72	enhancer_13	60	127	224	478	306	218	66	196	136.498	424.873	184.378	235.986	0.439567	0.527217	1.65963	0.279678
+	chr6	30953654	TGGCCTTCCTGTTCACTGTCCGG	GTGGCCTTCCTGTTCACTGTC	regulatory-gDNA sequences	CTCF_29	DHS_72	enhancer_13	1967	795	764	1246	663	1481	1484	1393	802.719	1133.49	1234.6	1591.12	2.45042	0.674025	0.537018	0.932676
-	chr6	30953657	CCTTCCTGTTCACTGTCCGGACC	GCCTTCCTGTTCACTGTCCGG	ineffective-gDNA	CTCF_29	DHS_72	enhancer_13	900	1547	1678	2749	2152	3070	3353	3289	1758.04	2692.71	2490.17	3609.3	0.511934	0.623164	0.864197	0.92899
-	chr6	30953661	CCTGTTCACTGTCCGGACCATAA	GCCTGTTCACTGTCCGGACCA	ineffective-gDNA	CTCF_29	DHS_72	enhancer_13	192	453	604	1074	836	1194	466	1022	446.494	952.74	992.532	1162.54	0.430017	0.633961	0.842291	0.400847
+	chr6	30953663	TGTTCACTGTCCGGACCATAAGG	GTGTTCACTGTCCGGACCATA	regulatory-gDNA sequences	CTCF_29	DHS_72	enhancer_13	45	128	33	70	154	170	192	175	137.53	73.9537	149.501	213.721	0.327201	0.446225	1.03009	0.898369
-	chr6	30953678	CCATAAGGCCTAAAGAATACTCC	GCCATAAGGCCTAAAGAATAC	ineffective-gDNA	CTCF_29	DHS_72	enhancer_13	0	0	0	0	0	0	0	0	2.64249	1.25247	5.82205	6.00696	0	0	0	0
-	chr6	30953686	CCTAAAGAATACTCCGATAAGTT	GCCTAAAGAATACTCCGATAA	ineffective-gDNA	CTCF_29	DHS_72	enhancer_13	0	0	0	0	0	0	0	0	2.64249	1.25247	5.82205	6.00696	0	0	0	0
+	chr6	30953694	ATACTCCGATAAGTTTATCAAGG	GATACTCCGATAAGTTTATCA	regulatory-gDNA sequences	CTCF_29	DHS_72	enhancer_13	0	0	0	0	0	0	0	0	2.64249	1.25247	5.82205	6.00696	0	0	0	0
+	chr6	30953698	TCCGATAAGTTTATCAAGGCCGG	GTCCGATAAGTTTATCAAGGC	regulatory-gDNA sequences	CTCF_29	DHS_72	enhancer_13	0	0	0	0	0	0	0	0	2.64249	1.25247	5.82205	6.00696	0	0	0	0
-	chr6	30953699	CCGATAAGTTTATCAAGGCCGGG	GCCGATAAGTTTATCAAGGCC	ineffective-gDNA	CTCF_29	DHS_72	enhancer_13	35	47	0	0	77	18	342	82	56.1621	1.25247	23.1156	108.318	0.623196	0	3.33109	3.15738
-	chr6	30955155	CCTGGTGCCCTATGCAAACTCTT	GCCTGGTGCCCTATGCAAACT	ineffective-gDNA	enhancer_14	-	-	0	0	0	0	0	0	0	0	2.64249	1.25247	5.82205	6.00696	0	0	0	0
-	chr6	30955162	CCCTATGCAAACTCTTATTTTAT	GCCCTATGCAAACTCTTATTT	ineffective-gDNA	enhancer_14	-	-	0	0	0	0	0	0	0	0	2.64249	1.25247	5.82205	6.00696	0	0	0	0
-	chr6	30956561	CCCTTCATCTCCTTTTGTCTGGG	GCCCTTCATCTCCTTTTGTCT	ineffective-gDNA	DHS_73	-	-	4	3	0	0	0	0	0	0	6.30508	1.25247	5.82205	6.00696	0.634409	0	0	0
-	chr6	30956562	CCTTCATCTCCTTTTGTCTGGGG	GCCTTCATCTCCTTTTGTCTG	ineffective-gDNA	DHS_73	-	-	834	594	732	513	905	1225	650	1159	577.368	450.436	1019.29	1324.4	1.44449	1.62509	0.887871	0.490789
+	chr6	30956575	TTGTCTGGGGTTTCTTTGTCTGG	GTTGTCTGGGGTTTCTTTGTC	regulatory-gDNA sequences	DHS_73	-	-	165	270	140	268	344	127	639	265	281.629	244.567	117.003	305.274	0.585876	0.572441	2.94011	2.0932
+	chr6	30956576	TGTCTGGGGTTTCTTTGTCTGGG	GTGTCTGGGGTTTCTTTGTCT	regulatory-gDNA sequences	DHS_73	-	-	96	168	542	35	391	187	266	365	179.215	40.2085	161.959	401.992	0.53567	13.4797	2.41419	0.661704
-	chr6	30956603	CCCTTTGGTTCTGTTTCACAGTT	GCCCTTTGGTTCTGTTTCACA	ineffective-gDNA	DHS_73	-	-	0	0	0	0	0	0	0	0	2.64249	1.25247	5.82205	6.00696	0	0	0	0
-	chr6	30956604	CCTTTGGTTCTGTTTCACAGTTC	GCCTTTGGTTCTGTTTCACAG	ineffective-gDNA	DHS_73	-	-	26	64	4	10	130	116	0	7	73.4161	13.0382	108.372	15.1018	0.354146	0.30679	1.19957	0
-	chr6	30956647	CCACAGCCAGGCTGCTCAGTCCC	GCCACAGCCAGGCTGCTCAGT	ineffective-gDNA	DHS_73	-	-	219	434	201	365	1017	1075	1093	1200	429.572	335.427	888.982	1372.19	0.50981	0.599236	1.144	0.796535
+	chr6	30956656	GGCTGCTCAGTCCCTCTCTGCGG	GGCTGCTCAGTCCCTCTCTG	regulatory-gDNA sequences	DHS_73	-	-	6	18	69	180	0	30	0	22	24.0817	166.563	34.3559	34.3524	0.249152	0.414258	0	0
+	chr6	30956657	GCTGCTCAGTCCCTCTCTGCGGG	GCTGCTCAGTCCCTCTCTGC	regulatory-gDNA sequences	DHS_73	-	-	52	171	144	269	97	158	423	299	182.351	245.546	140.597	338.158	0.285164	0.586449	0.689914	1.25089
+	chr6	30956658	CTGCTCAGTCCCTCTCTGCGGGG	GCTGCTCAGTCCCTCTCTGCG	regulatory-gDNA sequences	DHS_73	-	-	1606	999	532	874	1531	1689	1622	1636	1062.9	741.973	1400.21	1851.54	1.51097	0.717007	1.09341	0.87603
+	chr6	30956667	CCCTCTCTGCGGGGGCCTAGAGG	GCCCTCTCTGCGGGGGCCTAG	regulatory-gDNA sequences	DHS_73	-	-	111	182	0	0	32	87	106	123	193.834	1.25247	84.7999	156.05	0.572654	0	0.377359	0.679268
-	chr6	30956668	CCTCTCTGCGGGGGCCTAGAGGC	GCCTCTCTGCGGGGGCCTAGA	ineffective-gDNA	DHS_73	-	-	0	0	0	0	0	0	0	0	2.64249	1.25247	5.82205	6.00696	0	0	0	0
+	chr6	30956672	TCTGCGGGGGCCTAGAGGCTCGG	GTCTGCGGGGGCCTAGAGGCT	regulatory-gDNA sequences	DHS_73	-	-	0	0	0	0	0	0	0	15	2.64249	1.25247	5.82205	25.4083	0	0	0	0
+	chr6	30956677	GGGGGCCTAGAGGCTCGGTGAGG	GGGGGCCTAGAGGCTCGGTG	regulatory-gDNA sequences	DHS_73	-	-	13	22	216	28	77	0	24	48	28.6982	32.9019	5.82205	67.0075	0.45299	6.56496	13.2256	0.358169
+	chr6	30956678	GGGGCCTAGAGGCTCGGTGAGGG	GGGGCCTAGAGGCTCGGTGA	regulatory-gDNA sequences	DHS_73	-	-	0	0	0	0	0	0	0	0	2.64249	1.25247	5.82205	6.00696	0	0	0	0
+	chr6	30956679	GGGCCTAGAGGCTCGGTGAGGGG	GGGCCTAGAGGCTCGGTGAG	regulatory-gDNA sequences	DHS_73	-	-	0	0	0	0	0	0	0	0	2.64249	1.25247	5.82205	6.00696	0	0	0	0
-	chr6	30956682	CCTAGAGGCTCGGTGAGGGGAGC	GCCTAGAGGCTCGGTGAGGGG	ineffective-gDNA	DHS_73	-	-	37	149	49	84	47	328	189	241	159.352	86.4668	262.88	281.695	0.23219	0.566691	0.178789	0.670938
+	chr6	30956684	TAGAGGCTCGGTGAGGGGAGCGG	GTAGAGGCTCGGTGAGGGGAG	regulatory-gDNA sequences	DHS_73	-	-	0	0	0	0	0	0	0	0	2.64249	1.25247	5.82205	6.00696	0	0	0	0
+	chr6	30956691	TCGGTGAGGGGAGCGGGACTTGG	GTCGGTGAGGGGAGCGGGACT	regulatory-gDNA sequences	DHS_73	-	-	0	14	0	0	97	29	0	0	19.4187	1.25247	33.4275	6.00696	0	0	2.9018	0
-	chr6	30956717	CCATGGTCACATTGAAGCCAGCC	GCCATGGTCACATTGAAGCCA	ineffective-gDNA	DHS_73	-	-	108	105	0	0	189	123	88	71	114.017	1.25247	113.882	95.1329	0.947229	0	1.65961	0.925022
+	chr6	30956725	ACATTGAAGCCAGCCGCAGCTGG	GACATTGAAGCCAGCCGCAGC	regulatory-gDNA sequences	DHS_73	-	-	412	701	2120	607	656	1731	1004	1340	689.408	517.585	1433.39	1532.16	0.597614	4.09595	0.457658	0.655282
-	chr6	30957718	CCTCAGTTTCCAGTTTATTCAGT	GCCTCAGTTTCCAGTTTATTC	ineffective-gDNA	DHS_74	-	-	0	0	0	0	0	0	0	0	2.64249	1.25247	5.82205	6.00696	0	0	0	0
+	chr6	30957720	TCAGTTTCCAGTTTATTCAGTGG	GTCAGTTTCCAGTTTATTCAG	regulatory-gDNA sequences	DHS_74	-	-	0	0	0	0	0	0	0	0	2.64249	1.25247	5.82205	6.00696	0	0	0	0
-	chr6	30957761	CCCAAAGCCTTGTACACTCCTTC	GCCCAAAGCCTTGTACACTCC	ineffective-gDNA	DHS_74	-	-	523	755	110	212	518	546	824	1127	752.53	193.485	430.904	1286.86	0.694989	0.56852	1.20212	0.64032
-	chr6	30957762	CCAAAGCCTTGTACACTCCTTCA	GCCAAAGCCTTGTACACTCCT	ineffective-gDNA	DHS_74	-	-	60	97	56	84	106	189	355	309	105.979	86.4668	163.415	347.778	0.566151	0.647647	0.648655	1.02077
-	chr6	30957768	CCTTGTACACTCCTTCACCCTGC	GCCTTGTACACTCCTTCACCC	ineffective-gDNA	DHS_74	-	-	84	197	166	390	148	359	274	602	209.408	356.449	285.223	663.098	0.401131	0.465705	0.518892	0.413212
-	chr6	30957785	CCCTGCCCCCCACCCGTCGCTTC	GCCCTGCCCCCCACCCGTCGC	ineffective-gDNA	DHS_74	-	-	305	256	457	523	343	410	558	408	268.392	457.638	322.745	445.007	1.1364	0.998605	1.06276	1.25391
-	chr6	30957786	CCTGCCCCCCACCCGTCGCTTCT	GCCTGCCCCCCACCCGTCGCT	ineffective-gDNA	DHS_74	-	-	381	576	1376	1494	539	1153	1373	1506	559.853	1393.26	956.984	1713.24	0.680536	0.987613	0.563228	0.801406
-	chr6	30957790	CCCCCCACCCGTCGCTTCTTACT	GCCCCCCACCCGTCGCTTCTT	ineffective-gDNA	DHS_74	-	-	0	0	0	0	0	0	0	0	2.64249	1.25247	5.82205	6.00696	0	0	0	0
-	chr6	30957791	CCCCCACCCGTCGCTTCTTACTC	GCCCCCACCCGTCGCTTCTTA	ineffective-gDNA	DHS_74	-	-	0	0	0	0	0	0	0	0	2.64249	1.25247	5.82205	6.00696	0	0	0	0
-	chr6	30957792	CCCCACCCGTCGCTTCTTACTCT	GCCCCACCCGTCGCTTCTTAC	ineffective-gDNA	DHS_74	-	-	1	0	0	0	0	109	89	24	2.64249	1.25247	102.797	36.8955	0.378431	0	0	2.41222
-	chr6	30957793	CCCACCCGTCGCTTCTTACTCTC	GCCCACCCGTCGCTTCTTACT	ineffective-gDNA	DHS_74	-	-	17	66	22	37	159	155	12	142	75.4011	42.2571	138.354	177.472	0.225461	0.520623	1.14923	0.0676164
-	chr6	30957794	CCACCCGTCGCTTCTTACTCTCC	GCCACCCGTCGCTTCTTACTC	ineffective-gDNA	DHS_74	-	-	0	0	0	0	0	0	0	0	2.64249	1.25247	5.82205	6.00696	0	0	0	0
-	chr6	30957797	CCCGTCGCTTCTTACTCTCCCCA	GCCCGTCGCTTCTTACTCTCC	ineffective-gDNA	DHS_74	-	-	931	225	177	279	320	602	362	570	237.985	255.492	478.01	625.905	3.91201	0.69278	0.669443	0.578363
-	chr6	30957798	CCGTCGCTTCTTACTCTCCCCAG	GCCGTCGCTTCTTACTCTCCC	ineffective-gDNA	DHS_74	-	-	159	268	79	43	746	552	326	347	279.748	48.3047	435.923	384.432	0.568368	1.63545	1.71131	0.848004
+	chr6	30957826	GACCCAGCCTGCTCCTCCAGAGG	GACCCAGCCTGCTCCTCCAG	regulatory-gDNA sequences	DHS_74	-	-	0	16	0	0	0	0	0	0	21.7564	1.25247	5.82205	6.00696	0	0	0	0
+	chr6	30957842	CCAGAGGCAGCTGCAGCTCCCGG	GCCAGAGGCAGCTGCAGCTCC	regulatory-gDNA sequences	DHS_74	-	-	11	58	113	135	70	86	351	72	67.4151	129.614	83.9632	96.3384	0.163168	0.871819	0.833699	3.64341
+	chr6	30957847	GGCAGCTGCAGCTCCCGGAAGGG	GGCAGCTGCAGCTCCCGGAA	regulatory-gDNA sequences	DHS_74	-	-	134	7	0	0	0	23	0	0	11.1279	1.25247	27.8258	6.00696	12.0418	0	0	0
+	chr6	30957848	GCAGCTGCAGCTCCCGGAAGGGG	GCAGCTGCAGCTCCCGGAAG	regulatory-gDNA sequences	DHS_74	-	-	0	22	0	0	38	0	0	85	28.6982	1.25247	5.82205	111.885	0	0	6.52692	0
-	chr6	30957860	CCCGGAAGGGGACTGCAGCTAGT	GCCCGGAAGGGGACTGCAGCT	ineffective-gDNA	DHS_74	-	-	20	19	112	146	77	34	89	48	25.2399	138.649	38.0549	67.0075	0.792395	0.807797	2.02339	1.32821
-	chr6	30957861	CCGGAAGGGGACTGCAGCTAGTG	GCCGGAAGGGGACTGCAGCTA	ineffective-gDNA	DHS_74	-	-	369	603	213	276	619	681	595	902	586.247	252.477	545.345	1019.19	0.629427	0.84364	1.13506	0.583798
-	chr6	30958279	CCGAGTCCCGCATTCCAGCTGGC	GCCGAGTCCCGCATTCCAGCT	ineffective-gDNA	DHS_75	-	-	78	170	1	33	130	203	228	86	181.306	38.1429	173.567	113.071	0.430212	0.0262172	0.748989	2.01644
-	chr6	30958285	CCCGCATTCCAGCTGGCTCCAGC	GCCCGCATTCCAGCTGGCTCC	ineffective-gDNA	DHS_75	-	-	1540	3254	1738	3440	5177	7360	7056	5973	3888.97	3397.58	5863.05	6460.75	0.395992	0.511541	0.882988	1.09213
-	chr6	30958286	CCGCATTCCAGCTGGCTCCAGCT	GCCGCATTCCAGCTGGCTCCA	ineffective-gDNA	DHS_75	-	-	407	712	413	762	1055	1512	1306	1140	701.857	636.62	1259.76	1302.13	0.57989	0.648739	0.837461	1.00297
-	chr6	30958293	CCAGCTGGCTCCAGCTCCCTTTC	GCCAGCTGGCTCCAGCTCCCT	ineffective-gDNA	DHS_75	-	-	252	536	476	708	622	825	876	678	521.953	592.704	670.051	752.271	0.482802	0.803099	0.928287	1.16447
-	chr6	30958303	CCAGCTCCCTTTCCGTTGTCACT	GCCAGCTCCCTTTCCGTTGTC	ineffective-gDNA	DHS_75	-	-	8839	7785	5680	10288	9665	13439	13245	13403	9308.07	10000.7	10610.8	14340.1	0.949606	0.567961	0.910863	0.923631
-	chr6	30958309	CCCTTTCCGTTGTCACTTGACTC	GCCCTTTCCGTTGTCACTTGA	ineffective-gDNA	DHS_75	-	-	0	0	0	0	0	0	0	0	2.64249	1.25247	5.82205	6.00696	0	0	0	0
-	chr6	30958310	CCTTTCCGTTGTCACTTGACTCC	GCCTTTCCGTTGTCACTTGAC	ineffective-gDNA	DHS_75	-	-	0	0	111	28	0	37	37	218	2.64249	32.9019	40.8142	258.627	0	3.37366	0	0.143063
-	chr6	30958315	CCGTTGTCACTTGACTCCACTGG	GCCGTTGTCACTTGACTCCAC	ineffective-gDNA	DHS_75	-	-	68	119	59	122	467	142	202	230	128.268	118.861	128.54	270.73	0.530141	0.496379	3.63311	0.74613
+	chr6	30958316	CGTTGTCACTTGACTCCACTGGG	GCGTTGTCACTTGACTCCACT	regulatory-gDNA sequences	DHS_75	-	-	178	274	160	301	916	521	256	488	285.383	277.214	410.068	531.773	0.623723	0.57717	2.23378	0.481408
-	chr6	30958331	CCACTGGGCCCCAGCCTTGCATC	GCCACTGGGCCCCAGCCTTGC	ineffective-gDNA	DHS_75	-	-	1098	874	1330	1842	1509	2156	2054	2167	903.565	1756.1	1769.03	2416.33	1.21519	0.757359	0.853012	0.850049
-	chr6	30958340	CCCAGCCTTGCATCCCTCCCACT	GCCCAGCCTTGCATCCCTCCC	ineffective-gDNA	DHS_75	-	-	836	403	242	522	227	550	644	748	402.054	456.92	434.249	835.221	2.07932	0.529634	0.522741	0.771053
-	chr6	30958357	CCCACTCCTCCAGCCTAGAGCTG	GCCCACTCCTCCAGCCTAGAG	ineffective-gDNA	DHS_75	-	-	12	59	46	130	0	67	84	91	68.4208	125.491	67.7258	118.982	0.175385	0.366561	0	0.705989
+	chr6	30958358	CCACTCCTCCAGCCTAGAGCTGG	GCCACTCCTCCAGCCTAGAGC	regulatory-gDNA sequences	DHS_75	-	-	72	193	109	227	137	288	109	86	205.268	206.554	234.329	113.071	0.350761	0.527707	0.584647	0.963998
+	chr6	30958359	CACTCCTCCAGCCTAGAGCTGGG	GCACTCCTCCAGCCTAGAGCT	regulatory-gDNA sequences	DHS_75	-	-	312	93	51	54	141	71	0	54	101.993	59.0388	71.2	74.4192	3.05903	0.863838	1.98034	0
+	chr6	30958360	ACTCCTCCAGCCTAGAGCTGGGG	GACTCCTCCAGCCTAGAGCTG	regulatory-gDNA sequences	DHS_75	-	-	55	64	144	63	227	157	35	167	73.4161	67.52	139.85	205.047	0.749154	2.1327	1.62317	0.170692
[truncated: 1,919 more rows]

## Sheet: Rep_1 >50 reads >2 fold
strand	chr	start	ref	seq	sgRNA category	Candidate regulatory regions			YD36	YD37	YD36-37.pred	YD36/pred
+	chr6	30523104	GATAGAAAATCCATTGGACTTGG	GATAGAAAATCCATTGGACT	regulatory-gDNA sequences	CTCF_1	DHS_1	-	0	0	2.64249	0
-	chr6	30523114	CCATTGGACTTGGAGACTCAGTG	GCCATTGGACTTGGAGACTCA	ineffective-gDNA	CTCF_1	DHS_1	-	37	102	110.993	0.333355
+	chr6	30523140	TGTATTCCCGATCTCACCACTGG	GTGTATTCCCGATCTCACCAC	regulatory-gDNA sequences	CTCF_1	DHS_1	-	0	0	2.64249	0
+	chr6	30523143	ATTCCCGATCTCACCACTGGAGG	GATTCCCGATCTCACCACTGG	regulatory-gDNA sequences	CTCF_1	DHS_1	-	194	97	105.979	1.83055
+	chr6	30523144	TTCCCGATCTCACCACTGGAGGG	GTTCCCGATCTCACCACTGGA	regulatory-gDNA sequences	CTCF_1	DHS_1	-	0	0	2.64249	0
-	chr6	30523146	CCCGATCTCACCACTGGAGGGAG	GCCCGATCTCACCACTGGAGG	ineffective-gDNA	CTCF_1	DHS_1	-	0	0	2.64249	0
+	chr6	30523147	CCGATCTCACCACTGGAGGGAGG	GCCGATCTCACCACTGGAGGG	regulatory-gDNA sequences	CTCF_1	DHS_1	-	12	19	25.2399	0.475437
+	chr6	30523150	ATCTCACCACTGGAGGGAGGTGG	GATCTCACCACTGGAGGGAGG	regulatory-gDNA sequences	CTCF_1	DHS_1	-	48	93	101.993	0.47062
+	chr6	30523151	TCTCACCACTGGAGGGAGGTGGG	GTCTCACCACTGGAGGGAGGT	regulatory-gDNA sequences	CTCF_1	DHS_1	-	7	0	2.64249	2.64902
+	chr6	30523173	GAGAGGCATATGAGTGAGTGTGG	GAGAGGCATATGAGTGAGTG	regulatory-gDNA sequences	CTCF_1	DHS_1	-	11	42	50.9045	0.216091
-	chr6	30523209	CCCAGCCAGCTAGTGTGCAGGTT	GCCCAGCCAGCTAGTGTGCAG	ineffective-gDNA	CTCF_1	DHS_1	-	4404	3711	4450.84	0.989476
-	chr6	30523210	CCAGCCAGCTAGTGTGCAGGTTG	GCCAGCCAGCTAGTGTGCAGG	ineffective-gDNA	CTCF_1	DHS_1	-	55	162	172.94	0.31803
-	chr6	30523214	CCAGCTAGTGTGCAGGTTGCCCT	GCCAGCTAGTGTGCAGGTTGC	ineffective-gDNA	CTCF_1	DHS_1	-	12788	16895	19315.5	0.662058
+	chr6	30523230	TTGCCCTGCAGATTCTCACCAGG	GTTGCCCTGCAGATTCTCACC	regulatory-gDNA sequences	CTCF_1	DHS_1	-	0	8	12.3235	0
+	chr6	30523231	TGCCCTGCAGATTCTCACCAGGG	GTGCCCTGCAGATTCTCACCA	regulatory-gDNA sequences	CTCF_1	DHS_1	-	0	62	71.4241	0
+	chr6	30523262	AAGCCCAGAGGGCACCCCAGAGG	GAAGCCCAGAGGGCACCCCAG	regulatory-gDNA sequences	CTCF_1	DHS_1	-	0	0	2.64249	0
-	chr6	30526786	CCTCAACTTAAATAGTGCTGAGC	GCCTCAACTTAAATAGTGCTG	ineffective-gDNA	DHS_2	-	-	0	0	2.64249	0
+	chr6	30526805	GAGCTGCAACTTGTTTTCCGCGG	GAGCTGCAACTTGTTTTCCG	regulatory-gDNA sequences	DHS_2	-	-	370	475	466.202	0.793648
+	chr6	30526818	TTTTCCGCGGCTTGTAGTCGAGG	GTTTTCCGCGGCTTGTAGTCG	regulatory-gDNA sequences	DHS_2	-	-	904	686	672.745	1.34375
+	chr6	30526821	TCCGCGGCTTGTAGTCGAGGAGG	GTCCGCGGCTTGTAGTCGAGG	regulatory-gDNA sequences	DHS_2	-	-	0	0	2.64249	0
-	chr6	30526822	CCGCGGCTTGTAGTCGAGGAGGA	GCCGCGGCTTGTAGTCGAGGA	ineffective-gDNA	DHS_2	-	-	0	0	2.64249	0
+	chr6	30526832	TAGTCGAGGAGGAGCCCACGAGG	GTAGTCGAGGAGGAGCCCACG	regulatory-gDNA sequences	DHS_2	-	-	0	0	2.64249	0
-	chr6	30526846	CCCACGAGGCTTTAGCTGCTGCA	GCCCACGAGGCTTTAGCTGCT	ineffective-gDNA	DHS_2	-	-	0	0	2.64249	0
-	chr6	30526847	CCACGAGGCTTTAGCTGCTGCAA	GCCACGAGGCTTTAGCTGCTG	ineffective-gDNA	DHS_2	-	-	159	242	254.858	0.623876
+	chr6	30526873	CCAAGCGCGCTCCCGCCCAGCGG	GCCAAGCGCGCTCCCGCCCAG	regulatory-gDNA sequences	DHS_2	-	-	74	115	124.175	0.595935
+	chr6	30526876	AGCGCGCTCCCGCCCAGCGGTGG	GAGCGCGCTCCCGCCCAGCGG	regulatory-gDNA sequences	DHS_2	-	-	0	0	2.64249	0
-	chr6	30526900	CCCGGGCTCAGGGAACCAGCGCT	GCCCGGGCTCAGGGAACCAGC	ineffective-gDNA	DHS_2	-	-	0	0	2.64249	0
-	chr6	30526901	CCGGGCTCAGGGAACCAGCGCTG	GCCGGGCTCAGGGAACCAGCG	ineffective-gDNA	DHS_2	-	-	0	0	2.64249	0
-	chr6	30526915	CCAGCGCTGCTTCTCTCCGAGGC	GCCAGCGCTGCTTCTCTCCGA	ineffective-gDNA	DHS_2	-	-	361	180	191.749	1.88267
+	chr6	30526921	CTGCTTCTCTCCGAGGCTCGCGG	GCTGCTTCTCTCCGAGGCTCG	regulatory-gDNA sequences	DHS_2	-	-	779	1291	1433.98	0.543243
-	chr6	30526931	CCGAGGCTCGCGGCCTGAGAAAC	GCCGAGGCTCGCGGCCTGAGA	ineffective-gDNA	DHS_2	-	-	21	46	55.1187	0.380996
+	chr6	30526949	GAAACCTTCCGCTCCGAATG	GAAACCTTCCGCTCCGAATG	control-gDNA sequences	-	-	-	0	8	12.3235	0
+	chr6	30527181	GGATAGCCCAATCGGATGCT	GGATAGCCCAATCGGATGCT	control-gDNA sequences	-	-	-	102	157	167.711	0.608191
+	chr6	30527182	GATAGCCCAATCGGATGCTG	GATAGCCCAATCGGATGCTG	control-gDNA sequences	-	-	-	52	78	87.2165	0.596218
+	chr6	30527184	TAGCCCAATCGGATGCTGGG	GTAGCCCAATCGGATGCTGGG	control-gDNA sequences	-	-	-	0	3	6.30508	0
-	chr6	30527191	CGGACCCCCCAGCATCCGAT	GCGGACCCCCCAGCATCCGAT	control-gDNA sequences	-	-	-	102	252	264.562	0.385543
+	chr6	30527193	CGGATGCTGGGGGGTCCGTT	GCGGATGCTGGGGGGTCCGTT	control-gDNA sequences	-	-	-	611	855	879.321	0.694854
-	chr6	30527517	ATATGTCGCAGGACCGGTGG	GATATGTCGCAGGACCGGTGG	control-gDNA sequences	-	-	-	342	67	76.3912	4.47695
+	chr6	30527955	CCACGGAGGTACTTCGCCTG	GCCACGGAGGTACTTCGCCTG	control-gDNA sequences	-	-	-	12	24	30.991	0.38721
+	chr6	30527959	GGAGGTACTTCGCCTGAGGC	GGAGGTACTTCGCCTGAGGC	control-gDNA sequences	-	-	-	6	4	7.51709	0.798182
-	chr6	30528817	CGACGATCACCGACCAGGAG	GCGACGATCACCGACCAGGAG	control-gDNA sequences	-	-	-	0	0	2.64249	0
-	chr6	30528817	CTCCTGGTCGGTGATCGTCG	GCTCCTGGTCGGTGATCGTCG	control-gDNA sequences	-	-	-	0	0	2.64249	0
-	chr6	30528822	GTCCGCGACGATCACCGACC	GTCCGCGACGATCACCGACC	control-gDNA sequences	-	-	-	0	14	19.4187	0
+	chr6	30529453	GGAGGAAACATCTGTACTCCAGG	GGAGGAAACATCTGTACTCC	regulatory-gDNA sequences	CTCF_2	DHS_3	-	0	0	2.64249	0
+	chr6	30529473	AGGATTTAGAGACACCGACACGG	GAGGATTTAGAGACACCGACA	regulatory-gDNA sequences	CTCF_2	DHS_3	-	36	74	83.2896	0.432227
+	chr6	30529474	GGATTTAGAGACACCGACACGGG	GGATTTAGAGACACCGACAC	regulatory-gDNA sequences	CTCF_2	DHS_3	-	26	116	125.196	0.207674
+	chr6	30529480	AGAGACACCGACACGGGAGCAGG	GAGAGACACCGACACGGGAGC	regulatory-gDNA sequences	CTCF_2	DHS_3	-	171	160	170.848	1.00089
+	chr6	30529481	GAGACACCGACACGGGAGCAGGG	GAGACACCGACACGGGAGCA	regulatory-gDNA sequences	CTCF_2	DHS_3	-	174	453	446.494	0.389703
-	chr6	30529487	CCGACACGGGAGCAGGGCGCCCC	GCCGACACGGGAGCAGGGCGC	ineffective-gDNA	CTCF_2	DHS_3	-	464	909	948.206	0.489345
-	chr6	30529524	CCTGTTCTGCAGCTGGAAACCGA	GCCTGTTCTGCAGCTGGAAAC	ineffective-gDNA	CTCF_2	DHS_3	-	0	0	2.64249	0
+	chr6	30529529	TCTGCAGCTGGAAACCGAACGGG	GTCTGCAGCTGGAAACCGAAC	regulatory-gDNA sequences	CTCF_2	DHS_3	-	0	0	2.64249	0
+	chr6	30529538	GGAAACCGAACGGGACCCTGTGG	GGAAACCGAACGGGACCCTG	regulatory-gDNA sequences	CTCF_2	DHS_3	-	18	43	51.9644	0.346391
-	chr6	30529543	CCGAACGGGACCCTGTGGAAGTC	GCCGAACGGGACCCTGTGGAA	ineffective-gDNA	CTCF_2	DHS_3	-	0	0	2.64249	0
+	chr6	30529547	ACGGGACCCTGTGGAAGTCGCGG	GACGGGACCCTGTGGAAGTCG	regulatory-gDNA sequences	CTCF_2	DHS_3	-	1	26	33.2744	0.0300531
+	chr6	30529548	CGGGACCCTGTGGAAGTCGCGGG	GCGGGACCCTGTGGAAGTCGC	regulatory-gDNA sequences	CTCF_2	DHS_3	-	364	565	549.298	0.662664
+	chr6	30529551	GACCCTGTGGAAGTCGCGGGTGG	GACCCTGTGGAAGTCGCGGG	regulatory-gDNA sequences	CTCF_2	DHS_3	-	1457	243	255.837	5.69504
+	chr6	30529552	ACCCTGTGGAAGTCGCGGGTGGG	GACCCTGTGGAAGTCGCGGGT	regulatory-gDNA sequences	CTCF_2	DHS_3	-	486	424	420.688	1.15525
-	chr6	30529553	CCCTGTGGAAGTCGCGGGTGGGG	GCCCTGTGGAAGTCGCGGGTG	ineffective-gDNA	CTCF_2	DHS_3	-	517	1058	1138	0.454305
-	chr6	30529554	CCTGTGGAAGTCGCGGGTGGGGA	GCCTGTGGAAGTCGCGGGTGG	ineffective-gDNA	CTCF_2	DHS_3	-	3167	4740	5703.03	0.555319
+	chr6	30529563	GTCGCGGGTGGGGAAGCGAAAGG	GTCGCGGGTGGGGAAGCGAA	regulatory-gDNA sequences	CTCF_2	DHS_3	-	0	0	2.64249	0
+	chr6	30529564	TCGCGGGTGGGGAAGCGAAAGGG	GTCGCGGGTGGGGAAGCGAAA	regulatory-gDNA sequences	CTCF_2	DHS_3	-	0	0	2.64249	0
+	chr6	30529592	GAGCGTCTGTCCTCAGTCCTTGG	GAGCGTCTGTCCTCAGTCCT	regulatory-gDNA sequences	CTCF_2	DHS_3	-	6	51	60.299	0.0995042
+	chr6	30529593	AGCGTCTGTCCTCAGTCCTTGGG	GAGCGTCTGTCCTCAGTCCTT	regulatory-gDNA sequences	CTCF_2	DHS_3	-	0	0	2.64249	0
+	chr6	30539387	AGTACACTAAGTACAATAAATGG	GAGTACACTAAGTACAATAAA	regulatory-gDNA sequences	DHS_4	-	-	0	0	2.64249	0
+	chr6	30539396	AGTACAATAAATGGTAAACTTGG	GAGTACAATAAATGGTAAACT	regulatory-gDNA sequences	DHS_4	-	-	0	0	2.64249	0
+	chr6	30539454	GTAATAATATTAGTACTAAGTGG	GTAATAATATTAGTACTAAG	regulatory-gDNA sequences	DHS_4	-	-	0	0	2.64249	0
+	chr6	30539488	GAAACCGCAAACCGCAGCCATGG	GAAACCGCAAACCGCAGCCA	regulatory-gDNA sequences	DHS_4	-	-	782	977	1034.87	0.755647
-	chr6	30539492	CCGCAAACCGCAGCCATGGCAGA	GCCGCAAACCGCAGCCATGGC	ineffective-gDNA	DHS_4	-	-	2260	4178	5021.33	0.45008
+	chr6	30539494	GCAAACCGCAGCCATGGCAGAGG	GCAAACCGCAGCCATGGCAG	regulatory-gDNA sequences	DHS_4	-	-	253	600	583.278	0.433755
-	chr6	30539499	CCGCAGCCATGGCAGAGGAACCT	GCCGCAGCCATGGCAGAGGAA	ineffective-gDNA	DHS_4	-	-	0	0	2.64249	0
-	chr6	30539505	CCATGGCAGAGGAACCTCAGCTT	GCCATGGCAGAGGAACCTCAG	ineffective-gDNA	DHS_4	-	-	0	0	2.64249	0
+	chr6	30539516	GAACCTCAGCTTAAATAGTGTGG	GAACCTCAGCTTAAATAGTG	regulatory-gDNA sequences	DHS_4	-	-	0	0	2.64249	0
-	chr6	30539519	CCTCAGCTTAAATAGTGTGGAGC	GCCTCAGCTTAAATAGTGTGG	ineffective-gDNA	DHS_4	-	-	127	190	202.156	0.628227
+	chr6	30539521	TCAGCTTAAATAGTGTGGAGCGG	GTCAGCTTAAATAGTGTGGAG	regulatory-gDNA sequences	DHS_4	-	-	0	0	2.64249	0
+	chr6	30539528	AAATAGTGTGGAGCGGCCACTGG	GAAATAGTGTGGAGCGGCCAC	regulatory-gDNA sequences	DHS_4	-	-	220	482	472.506	0.465602
+	chr6	30539537	GGAGCGGCCACTGGTTTCCG	GGAGCGGCCACTGGTTTCCG	control-gDNA sequences	-	-	-	1599	1368	1531.58	1.04402
-	chr6	30539547	CTACGAGCCGCGGAAACCAG	GCTACGAGCCGCGGAAACCAG	control-gDNA sequences	-	-	-	2	10	14.703	0.136027
-	chr6	30539557	GCGGGCGCGACTACGAGCCG	GCGGGCGCGACTACGAGCCG	control-gDNA sequences	-	-	-	0	4	7.51709	0
+	chr6	30539558	GGCTCGTAGTCGCGCCCGCG	GGCTCGTAGTCGCGCCCGCG	control-gDNA sequences	-	-	-	7	41	49.8403	0.140449
+	chr6	30539901	GATGGCCCAATCGGGCGCTG	GATGGCCCAATCGGGCGCTG	control-gDNA sequences	-	-	-	153	264	275.976	0.554395
+	chr6	30539904	GGCCCAATCGGGCGCTGTGG	GGCCCAATCGGGCGCTGTGG	control-gDNA sequences	-	-	-	0	0	2.64249	0
-	chr6	30540233	CCGGTAGCCGGTGACGGGGC	GCCGGTAGCCGGTGACGGGGC	control-gDNA sequences	-	-	-	2	45	54.0713	0.0369882
+	chr6	30540235	CCCGTCACCGGCTACCGGCT	GCCCGTCACCGGCTACCGGCT	control-gDNA sequences	-	-	-	1261	247	259.733	4.85499
+	chr6	30540240	CACCGGCTACCGGCTAGGTC	GCACCGGCTACCGGCTAGGTC	control-gDNA sequences	-	-	-	84	133	142.703	0.588633
-	chr6	30540283	GTGGACGCCGAGCGCCCGCT	GTGGACGCCGAGCGCCCGCT	control-gDNA sequences	-	-	-	279	457	450.067	0.619908
-	chr6	30540922	CCCAAGCTCCATTCAGCCTGGGC	GCCCAAGCTCCATTCAGCCTG	ineffective-gDNA	DHS_5	-	-	1099	659	643.605	1.70757
-	chr6	30540923	CCAAGCTCCATTCAGCCTGGGCT	GCCAAGCTCCATTCAGCCTGG	ineffective-gDNA	DHS_5	-	-	244	363	366.482	0.66579
-	chr6	30541797	GGGATACCCTTAGAACAGAC	GGGATACCCTTAGAACAGAC	control-gDNA sequences	-	-	-	0	0	2.64249	0
-	chr6	30542373	TCGCTGTCGGCGCCGCGGCG	GTCGCTGTCGGCGCCGCGGCG	control-gDNA sequences	-	-	-	0	0	2.64249	0
-	chr6	30542373	CGCCGCGGCGCCGACAGCGA	GCGCCGCGGCGCCGACAGCGA	control-gDNA sequences	-	-	-	454	950	1000.47	0.453786
+	chr6	30542614	ACGAGGACGATCTGTCGCCC	GACGAGGACGATCTGTCGCCC	control-gDNA sequences	-	-	-	213	468	459.915	0.463129
-	chr6	30543280	AGTCATCCTACTGACAACGA	GAGTCATCCTACTGACAACGA	control-gDNA sequences	-	-	-	0	0	2.64249	0
+	chr6	30544651	GTTCTTCCGCCCGCTGTTGG	GTTCTTCCGCCCGCTGTTGG	control-gDNA sequences	-	-	-	3930	4628	5567.59	0.70587
-	chr6	30544683	AGCCCGCAGTGTGGTCCGAA	GAGCCCGCAGTGTGGTCCGAA	control-gDNA sequences	-	-	-	334	31	38.929	8.57973
-	chr6	30557906	CCCTGTTCTGCCGAGATCCGAAG	GCCCTGTTCTGCCGAGATCCG	ineffective-gDNA	CTCF_3	DHS_6	-	1432	1699	1949.89	0.734401
+	chr6	30557907	CCTGTTCTGCCGAGATCCGAAGG	GCCTGTTCTGCCGAGATCCGA	regulatory-gDNA sequences	CTCF_3	DHS_6	-	26	104	113.007	0.230073
+	chr6	30557908	CTGTTCTGCCGAGATCCGAAGGG	GCTGTTCTGCCGAGATCCGAA	regulatory-gDNA sequences	CTCF_3	DHS_6	-	0	0	2.64249	0
+	chr6	30557909	TGTTCTGCCGAGATCCGAAGGGG	GTGTTCTGCCGAGATCCGAAG	regulatory-gDNA sequences	CTCF_3	DHS_6	-	0	0	2.64249	0
-	chr6	30557916	CCGAGATCCGAAGGGGAACCTGG	GCCGAGATCCGAAGGGGAACC	ineffective-gDNA	CTCF_3	DHS_6	-	0	0	2.64249	0
+	chr6	30557917	CGAGATCCGAAGGGGAACCTGGG	GCGAGATCCGAAGGGGAACCT	regulatory-gDNA sequences	CTCF_3	DHS_6	-	0	0	2.64249	0
+	chr6	30557918	GAGATCCGAAGGGGAACCTGGGG	GAGATCCGAAGGGGAACCTG	regulatory-gDNA sequences	CTCF_3	DHS_6	-	0	0	2.64249	0
-	chr6	30557923	CCGAAGGGGAACCTGGGGAGGTC	GCCGAAGGGGAACCTGGGGAG	ineffective-gDNA	CTCF_3	DHS_6	-	0	0	2.64249	0
+	chr6	30557932	AACCTGGGGAGGTCCCAGATGGG	GAACCTGGGGAGGTCCCAGAT	regulatory-gDNA sequences	CTCF_3	DHS_6	-	2	24	30.991	0.064535
+	chr6	30557973	GGTGTCTCTCCTCAGTCCTTCGG	GGTGTCTCTCCTCAGTCCTT	regulatory-gDNA sequences	CTCF_3	DHS_6	-	0	0	2.64249	0
+	chr6	30558004	GGCCGCTGCCGCTCTACGCTTGG	GGCCGCTGCCGCTCTACGCT	regulatory-gDNA sequences	CTCF_3	DHS_6	-	20	45	54.0713	0.369882
+	chr6	30558005	GCCGCTGCCGCTCTACGCTTGGG	GCCGCTGCCGCTCTACGCTT	regulatory-gDNA sequences	CTCF_3	DHS_6	-	36	88	97.0446	0.370963
-	chr6	30558006	CCGCTGCCGCTCTACGCTTGGGT	GCCGCTGCCGCTCTACGCTTG	ineffective-gDNA	CTCF_3	DHS_6	-	518	702	690.532	0.750146
-	chr6	30558012	CCGCTCTACGCTTGGGTTCTGAT	GCCGCTCTACGCTTGGGTTCT	ineffective-gDNA	CTCF_3	DHS_6	-	327	641	624.743	0.523415
+	chr6	30559501	TCGACCCTTTAAAAGCTGTTTGG	GTCGACCCTTTAAAAGCTGTT	regulatory-gDNA sequences	CTCF_4	-	-	0	0	2.64249	0
+	chr6	30559502	CGACCCTTTAAAAGCTGTTTGGG	GCGACCCTTTAAAAGCTGTTT	regulatory-gDNA sequences	CTCF_4	-	-	0	0	2.64249	0
-	chr6	30559505	CCCTTTAAAAGCTGTTTGGGCTA	GCCCTTTAAAAGCTGTTTGGG	ineffective-gDNA	CTCF_4	-	-	0	0	2.64249	0
-	chr6	30559506	CCTTTAAAAGCTGTTTGGGCTAT	GCCTTTAAAAGCTGTTTGGGC	ineffective-gDNA	CTCF_4	-	-	155	276	287.255	0.53959
-	chr6	30559534	CCATTCAATGAGAAACTTCAGTC	GCCATTCAATGAGAAACTTCA	ineffective-gDNA	CTCF_4	-	-	0	0	2.64249	0
+	chr6	30559601	AATAAACAAAATTGCCATTAGGG	GAATAAACAAAATTGCCATTA	regulatory-gDNA sequences	CTCF_4	-	-	0	0	2.64249	0
+	chr6	30559602	ATAAACAAAATTGCCATTAGGGG	GATAAACAAAATTGCCATTAG	regulatory-gDNA sequences	CTCF_4	-	-	0	0	2.64249	0
-	chr6	30559615	CCATTAGGGGTCGCACCAGTCTC	GCCATTAGGGGTCGCACCAGT	ineffective-gDNA	CTCF_4	-	-	166	269	280.689	0.591401
+	chr6	30559628	CACCAGTCTCAAGAAAAATCTGG	GCACCAGTCTCAAGAAAAATC	regulatory-gDNA sequences	CTCF_4	-	-	0	0	2.64249	0
-	chr6	30559712	CCTATACTAGGCACACTATTAAA	GCCTATACTAGGCACACTATT	ineffective-gDNA	CTCF_4	-	-	0	0	2.64249	0
+	chr6	30559749	AGCCTCTACCATTTCCTCACAGG	GAGCCTCTACCATTTCCTCAC	regulatory-gDNA sequences	CTCF_4	-	-	0	0	2.64249	0
+	chr6	30559750	GCCTCTACCATTTCCTCACAGGG	GCCTCTACCATTTCCTCACA	regulatory-gDNA sequences	CTCF_4	-	-	0	0	2.64249	0
+	chr6	30563643	CACTAGTGAGGCGGCTAGTG	GCACTAGTGAGGCGGCTAGTG	control-gDNA sequences	-	-	-	32	108	117.052	0.273383
+	chr6	30563644	ACTAGTGAGGCGGCTAGTGA	GACTAGTGAGGCGGCTAGTGA	control-gDNA sequences	-	-	-	0	0	2.64249	0
+	chr6	30565107	TTCCCGTTCCTCTCGTAACCTGG	GTTCCCGTTCCTCTCGTAACC	regulatory-gDNA sequences	DHS_7	Promoter_1	-	192	136	145.815	1.31674
-	chr6	30565109	CCCGTTCCTCTCGTAACCTGGTC	GCCCGTTCCTCTCGTAACCTG	ineffective-gDNA	DHS_7	Promoter_1	-	38	90	99.0199	0.383761
-	chr6	30565110	CCGTTCCTCTCGTAACCTGGTCA	GCCGTTCCTCTCGTAACCTGG	ineffective-gDNA	DHS_7	Promoter_1	-	66	103	111.999	0.589289
-	chr6	30565115	CCTCTCGTAACCTGGTCATGTGT	GCCTCTCGTAACCTGGTCATG	ineffective-gDNA	DHS_7	Promoter_1	-	1113	2281	2680.64	0.4152
-	chr6	30565125	CCTGGTCATGTGTCCTTCTTCCT	GCCTGGTCATGTGTCCTTCTT	ineffective-gDNA	DHS_7	Promoter_1	-	0	0	2.64249	0
-	chr6	30565145	CCTGGATACTCATGACGCAGACT	GCCTGGATACTCATGACGCAG	ineffective-gDNA	DHS_7	Promoter_1	-	40	52	61.3246	0.652267
-	chr6	30565207	CCAATCAGCGTCGCCACGACTCC	GCCAATCAGCGTCGCCACGAC	ineffective-gDNA	DHS_7	Promoter_1	-	634	1303	1449.2	0.437483
-	chr6	30565220	CCACGACTCCCGACTATAAAGTC	GCCACGACTCCCGACTATAAA	ineffective-gDNA	DHS_7	Promoter_1	-	0	0	2.64249	0
-	chr6	30565228	CCCGACTATAAAGTCCCCATCCG	GCCCGACTATAAAGTCCCCAT	ineffective-gDNA	DHS_7	Promoter_1	-	100	164	175.031	0.571326
+	chr6	30565229	CCGACTATAAAGTCCCCATCCGG	GCCGACTATAAAGTCCCCATC	regulatory-gDNA sequences	DHS_7	Promoter_1	-	104	164	175.031	0.594179
-	chr6	30565242	CCCCATCCGGACTCAAGAAGTTC	GCCCCATCCGGACTCAAGAAG	ineffective-gDNA	DHS_7	Promoter_1	-	0	0	2.64249	0
-	chr6	30565243	CCCATCCGGACTCAAGAAGTTCT	GCCCATCCGGACTCAAGAAGT	ineffective-gDNA	DHS_7	Promoter_1	-	0	0	2.64249	0
-	chr6	30565244	CCATCCGGACTCAAGAAGTTCTC	GCCATCCGGACTCAAGAAGTT	ineffective-gDNA	DHS_7	Promoter_1	-	0	0	2.64249	0
+	chr6	30565247	TCCGGACTCAAGAAGTTCTCAGG	GTCCGGACTCAAGAAGTTCTC	regulatory-gDNA sequences	DHS_7	Promoter_1	-	0	0	2.64249	0
-	chr6	30565248	CCGGACTCAAGAAGTTCTCAGGA	GCCGGACTCAAGAAGTTCTCA	ineffective-gDNA	DHS_7	Promoter_1	-	0	0	2.64249	0
+	chr6	30565260	AGTTCTCAGGACTCAGAGGCTGG	GAGTTCTCAGGACTCAGAGGC	regulatory-gDNA sequences	DHS_7	Promoter_1	-	0	5	8.72483	0
+	chr6	30565261	GTTCTCAGGACTCAGAGGCTGGG	GTTCTCAGGACTCAGAGGCT	regulatory-gDNA sequences	DHS_7	Promoter_1	-	0	0	2.64249	0
-	chr6	30565662	CCGGGAGACACGGAGCGCCAGGG	GCCGGGAGACACGGAGCGCCA	ineffective-gDNA	DHS_8	-	-	20	55	64.3826	0.310643
-	chr6	30565679	CCAGGGACACCGCACAGATTTTC	GCCAGGGACACCGCACAGATT	ineffective-gDNA	DHS_8	-	-	8	68	77.38	0.103386
-	chr6	30565688	CCGCACAGATTTTCCGAGTGAAT	GCCGCACAGATTTTCCGAGTG	ineffective-gDNA	DHS_8	-	-	2076	2065	2410.14	0.861362
+	chr6	30565705	GTGAATCTGCGGACGCTGCGCGG	GTGAATCTGCGGACGCTGCG	regulatory-gDNA sequences	DHS_8	-	-	520	833	851.241	0.610873
+	chr6	30565808	CGCGGGTCCCCTCGAATCTT	GCGCGGGTCCCCTCGAATCTT	control-gDNA sequences	-	-	-	0	0	2.64249	0
+	chr6	30565900	ACCCGGTTCTTTTTCAGTTTAGG	GACCCGGTTCTTTTTCAGTTT	regulatory-gDNA sequences	DHS_9	-	-	79	131	140.632	0.561749
+	chr6	30565916	GTTTAGGCCAAAATGCCCACAGG	GTTTAGGCCAAAATGCCCAC	regulatory-gDNA sequences	DHS_9	-	-	0	0	2.64249	0
+	chr6	30565917	TTTAGGCCAAAATGCCCACAGGG	GTTTAGGCCAAAATGCCCACA	regulatory-gDNA sequences	DHS_9	-	-	0	0	2.64249	0
+	chr6	30565923	CCAAAATGCCCACAGGGTGGTGG	GCCAAAATGCCCACAGGGTGG	regulatory-gDNA sequences	DHS_9	-	-	102	185	196.959	0.517875
+	chr6	30565929	TGCCCACAGGGTGGTGGCGACGG	GTGCCCACAGGGTGGTGGCGA	regulatory-gDNA sequences	DHS_9	-	-	259	472	463.505	0.558786
+	chr6	30565930	GCCCACAGGGTGGTGGCGACGGG	GCCCACAGGGTGGTGGCGAC	regulatory-gDNA sequences	DHS_9	-	-	0	1	3.86787	0
+	chr6	30565931	CCCACAGGGTGGTGGCGACGGGG	GCCCACAGGGTGGTGGCGACG	regulatory-gDNA sequences	DHS_9	-	-	0	0	2.64249	0
+	chr6	30565932	CCACAGGGTGGTGGCGACGGGGG	GCCACAGGGTGGTGGCGACGG	regulatory-gDNA sequences	DHS_9	-	-	0	0	2.64249	0
+	chr6	30565942	GTGGCGACGGGGGCGGGGCTTGG	GTGGCGACGGGGGCGGGGCT	regulatory-gDNA sequences	DHS_9	-	-	416	758	756.191	0.550125
+	chr6	30565961	TTGGTGGGCGGGACTGACTAAGG	GTTGGTGGGCGGGACTGACTA	regulatory-gDNA sequences	DHS_9	-	-	29	83	92.1241	0.314793
+	chr6	30565962	TGGTGGGCGGGACTGACTAAGGG	GTGGTGGGCGGGACTGACTAA	regulatory-gDNA sequences	DHS_9	-	-	0	0	2.64249	0
+	chr6	30565963	GGTGGGCGGGACTGACTAAGGGG	GGTGGGCGGGACTGACTAAG	regulatory-gDNA sequences	DHS_9	-	-	0	0	2.64249	0
+	chr6	30565966	GGGCGGGACTGACTAAGGGGCGG	GGGCGGGACTGACTAAGGGG	regulatory-gDNA sequences	DHS_9	-	-	38	58	67.4151	0.563672
+	chr6	30565967	GGCGGGACTGACTAAGGGGCGGG	GGCGGGACTGACTAAGGGGC	regulatory-gDNA sequences	DHS_9	-	-	120	274	285.383	0.420488
+	chr6	30565968	GCGGGACTGACTAAGGGGCGGGG	GCGGGACTGACTAAGGGGCG	regulatory-gDNA sequences	DHS_9	-	-	89	219	231.933	0.383731
+	chr6	30565973	ACTGACTAAGGGGCGGGGCCAGG	GACTGACTAAGGGGCGGGGCC	regulatory-gDNA sequences	DHS_9	-	-	888	929	973.706	0.91198
+	chr6	30565974	CTGACTAAGGGGCGGGGCCAGGG	GCTGACTAAGGGGCGGGGCCA	regulatory-gDNA sequences	DHS_9	-	-	189	583	566.627	0.333553
+	chr6	30566000	CACACCCTGCAGTGGATGCATGG	GCACACCCTGCAGTGGATGCA	regulatory-gDNA sequences	DHS_9	-	-	484	590	573.448	0.844017
-	chr6	30566004	CCCTGCAGTGGATGCATGGCTGC	GCCCTGCAGTGGATGCATGGC	ineffective-gDNA	DHS_9	-	-	1448	794	801.441	1.80675
-	chr6	30566005	CCTGCAGTGGATGCATGGCTGCG	GCCTGCAGTGGATGCATGGCT	ineffective-gDNA	DHS_9	-	-	752	1493	1689.78	0.445028
+	chr6	30566011	GTGGATGCATGGCTGCGAGCTGG	GTGGATGCATGGCTGCGAGC	regulatory-gDNA sequences	DHS_9	-	-	35	85	94.0899	0.371985
+	chr6	30566012	TGGATGCATGGCTGCGAGCTGGG	GTGGATGCATGGCTGCGAGCT	regulatory-gDNA sequences	DHS_9	-	-	255	505	493.372	0.516851
+	chr6	30566013	GGATGCATGGCTGCGAGCTGGGG	GGATGCATGGCTGCGAGCTG	regulatory-gDNA sequences	DHS_9	-	-	59	138	147.893	0.398938
+	chr6	30568185	GCTGAGTGTAAGTGCGGGGC	GCTGAGTGTAAGTGCGGGGC	control-gDNA sequences	-	-	-	52	225	237.985	0.218501
-	chr6	30569570	CCAGGCCACAGGAGAGAGTGCCT	GCCAGGCCACAGGAGAGAGTG	ineffective-gDNA	CTCF_5	DHS_10	-	174	362	365.589	0.475944
-	chr6	30569575	CCACAGGAGAGAGTGCCTTGTGG	GCCACAGGAGAGAGTGCCTTG	ineffective-gDNA	CTCF_5	DHS_10	-	522	25	32.1338	16.2446
+	chr6	30569583	GAGAGTGCCTTGTGGAGCGCTGG	GAGAGTGCCTTGTGGAGCGC	regulatory-gDNA sequences	CTCF_5	DHS_10	-	221	388	388.739	0.568505
+	chr6	30569584	AGAGTGCCTTGTGGAGCGCTGGG	GAGAGTGCCTTGTGGAGCGCT	regulatory-gDNA sequences	CTCF_5	DHS_10	-	116	254	266.481	0.435303
+	chr6	30569607	AGCAGGACCTGACCACCACCAGG	GAGCAGGACCTGACCACCACC	regulatory-gDNA sequences	CTCF_5	DHS_10	-	0	0	2.64249	0
+	chr6	30569652	GGCAGCATGCAGCGCCCCCTTGG	GGCAGCATGCAGCGCCCCCT	regulatory-gDNA sequences	CTCF_5	DHS_10	-	173	317	325.058	0.532213
+	chr6	30569653	GCAGCATGCAGCGCCCCCTTGGG	GCAGCATGCAGCGCCCCCTT	regulatory-gDNA sequences	CTCF_5	DHS_10	-	225	571	555.042	0.405375
+	chr6	30569664	CGCCCCCTTGGGAAAGCTTTAGG	GCGCCCCCTTGGGAAAGCTTT	regulatory-gDNA sequences	CTCF_5	DHS_10	-	8	31	38.929	0.205502
-	chr6	30569689	CCAGCCTGCAACCCATTCGAGCA	GCCAGCCTGCAACCCATTCGA	ineffective-gDNA	CTCF_5	DHS_10	-	0	0	2.64249	0
-	chr6	30569693	CCTGCAACCCATTCGAGCAGCCA	GCCTGCAACCCATTCGAGCAG	ineffective-gDNA	CTCF_5	DHS_10	-	0	0	2.64249	0
+	chr6	30569699	ACCCATTCGAGCAGCCACGTAGG	GACCCATTCGAGCAGCCACGT	regulatory-gDNA sequences	CTCF_5	DHS_10	-	1204	1148	1252.45	0.961319
-	chr6	30569700	CCCATTCGAGCAGCCACGTAGGC	GCCCATTCGAGCAGCCACGTA	ineffective-gDNA	CTCF_5	DHS_10	-	2538	3190	3810	0.666142
-	chr6	30569701	CCATTCGAGCAGCCACGTAGGCT	GCCATTCGAGCAGCCACGTAG	ineffective-gDNA	CTCF_5	DHS_10	-	1313	1565	1780.78	0.737317
-	chr6	30571234	ACATAGCCTGCCGATATGGC	GACATAGCCTGCCGATATGGC	control-gDNA sequences	-	-	-	473	674	659.663	0.717033
-	chr6	30571238	GCAAACATAGCCTGCCGATA	GCAAACATAGCCTGCCGATA	control-gDNA sequences	-	-	-	582	164	175.031	3.32512
+	chr6	30572763	CCAGACTAGGATCTTAACGG	GCCAGACTAGGATCTTAACGG	control-gDNA sequences	-	-	-	0	0	2.64249	0
-	chr6	30572765	CCCCGTTAAGATCCTAGTCT	GCCCCGTTAAGATCCTAGTCT	control-gDNA sequences	-	-	-	0	0	2.64249	0
-	chr6	30576763	CCACCACTAACTCGGCGGCT	GCCACCACTAACTCGGCGGCT	control-gDNA sequences	-	-	-	2958	2818	3349.56	0.8831
-	chr6	30585737	ATAAGAAACCACGTTTACGC	GATAAGAAACCACGTTTACGC	control-gDNA sequences	-	-	-	20	19	25.2399	0.792395
+	chr6	30590982	GAAATACGGCTACTCCTCAAAGG	GAAATACGGCTACTCCTCAA	regulatory-gDNA sequences	DHS_11	enhancer_1	-	0	0	2.64249	0
+	chr6	30590986	TACGGCTACTCCTCAAAGGAAGG	GTACGGCTACTCCTCAAAGGA	regulatory-gDNA sequences	DHS_11	enhancer_1	-	0	0	2.64249	0
+	chr6	30590991	CTACTCCTCAAAGGAAGGCTAGG	GCTACTCCTCAAAGGAAGGCT	regulatory-gDNA sequences	DHS_11	enhancer_1	-	0	2	5.0887	0
-	chr6	30590996	CCTCAAAGGAAGGCTAGGAATTT	GCCTCAAAGGAAGGCTAGGAA	ineffective-gDNA	DHS_11	enhancer_1	-	0	0	2.64249	0
-	chr6	30591031	CCCTAGTCGTAGTTCTTCACAGA	GCCCTAGTCGTAGTTCTTCAC	ineffective-gDNA	DHS_11	enhancer_1	-	0	0	2.64249	0
-	chr6	30591032	CCTAGTCGTAGTTCTTCACAGAG	GCCTAGTCGTAGTTCTTCACA	ineffective-gDNA	DHS_11	enhancer_1	-	0	0	2.64249	0
+	chr6	30591033	CTAGTCGTAGTTCTTCACAGAGG	GCTAGTCGTAGTTCTTCACAG	regulatory-gDNA sequences	DHS_11	enhancer_1	-	0	38	46.6199	0
+	chr6	30591034	TAGTCGTAGTTCTTCACAGAGGG	GTAGTCGTAGTTCTTCACAGA	regulatory-gDNA sequences	DHS_11	enhancer_1	-	0	0	2.64249	0
-	chr6	30591102	CCCCACAGAGCAAGACAAAAGAA	GCCCCACAGAGCAAGACAAAA	ineffective-gDNA	DHS_11	enhancer_1	-	0	0	2.64249	0
-	chr6	30591103	CCCACAGAGCAAGACAAAAGAAG	GCCCACAGAGCAAGACAAAAG	ineffective-gDNA	DHS_11	enhancer_1	-	0	0	2.64249	0
+	chr6	30591116	ACAAAAGAAGCCGGCAAGGATGG	GACAAAAGAAGCCGGCAAGGA	regulatory-gDNA sequences	DHS_11	enhancer_1	-	9	20	26.3954	0.340969
+	chr6	30591122	GAAGCCGGCAAGGATGGCTCTGG	GAAGCCGGCAAGGATGGCTC	regulatory-gDNA sequences	DHS_11	enhancer_1	-	0	0	2.64249	0
-	chr6	30591126	CCGGCAAGGATGGCTCTGGTCAG	GCCGGCAAGGATGGCTCTGGT	ineffective-gDNA	DHS_11	enhancer_1	-	65	97	105.979	0.61333
-	chr6	30591278	CCCCGATCCCTACCAACCCACTG	GCCCCGATCCCTACCAACCCA	ineffective-gDNA	DHS_11	enhancer_1	-	0	0	2.64249	0
-	chr6	30591279	CCCGATCCCTACCAACCCACTGC	GCCCGATCCCTACCAACCCAC	ineffective-gDNA	DHS_11	enhancer_1	-	15	24	30.991	0.484012
-	chr6	30591280	CCGATCCCTACCAACCCACTGCA	GCCGATCCCTACCAACCCACT	ineffective-gDNA	DHS_11	enhancer_1	-	0	0	2.64249	0
+	chr6	30591282	GATCCCTACCAACCCACTGCAGG	GATCCCTACCAACCCACTGC	regulatory-gDNA sequences	DHS_11	enhancer_1	-	0	0	2.64249	0
-	chr6	30591285	CCCTACCAACCCACTGCAGGCAT	GCCCTACCAACCCACTGCAGG	ineffective-gDNA	DHS_11	enhancer_1	-	21	40	48.7715	0.430579
-	chr6	30591286	CCTACCAACCCACTGCAGGCATA	GCCTACCAACCCACTGCAGGC	ineffective-gDNA	DHS_11	enhancer_1	-	157	346	351.263	0.446958
-	chr6	30591295	CCACTGCAGGCATATGAGCCCTA	GCCACTGCAGGCATATGAGCC	ineffective-gDNA	DHS_11	enhancer_1	-	157	475	466.202	0.336764
+	chr6	30591303	GGCATATGAGCCCTAAAATCTGG	GGCATATGAGCCCTAAAATC	regulatory-gDNA sequences	DHS_11	enhancer_1	-	0	0	2.64249	0
+	chr6	30591304	GCATATGAGCCCTAAAATCTGGG	GCATATGAGCCCTAAAATCT	regulatory-gDNA sequences	DHS_11	enhancer_1	-	0	0	2.64249	0
+	chr6	30591309	TGAGCCCTAAAATCTGGGAAAGG	GTGAGCCCTAAAATCTGGGAA	regulatory-gDNA sequences	DHS_11	enhancer_1	-	0	0	2.64249	0
-	chr6	30591313	CCCTAAAATCTGGGAAAGGCTTT	GCCCTAAAATCTGGGAAAGGC	ineffective-gDNA	DHS_11	enhancer_1	-	28	61	70.4252	0.397585
-	chr6	30591314	CCTAAAATCTGGGAAAGGCTTTT	GCCTAAAATCTGGGAAAGGCT	ineffective-gDNA	DHS_11	enhancer_1	-	58	114	123.154	0.470955
+	chr6	30591323	TGGGAAAGGCTTTTTTCCCTAGG	GTGGGAAAGGCTTTTTTCCCT	regulatory-gDNA sequences	DHS_11	enhancer_1	-	0	0	2.64249	0
+	chr6	30591324	GGGAAAGGCTTTTTTCCCTAGGG	GGGAAAGGCTTTTTTCCCTA	regulatory-gDNA sequences	DHS_11	enhancer_1	-	0	0	2.64249	0
+	chr6	30591325	GGAAAGGCTTTTTTCCCTAGGGG	GGAAAGGCTTTTTTCCCTAG	regulatory-gDNA sequences	DHS_11	enhancer_1	-	0	0	2.64249	0
-	chr6	30591339	CCCTAGGGGCCCTGGCCTCACAG	GCCCTAGGGGCCCTGGCCTCA	ineffective-gDNA	DHS_11	enhancer_1	-	0	0	2.64249	0
-	chr6	30591340	CCTAGGGGCCCTGGCCTCACAGA	GCCTAGGGGCCCTGGCCTCAC	ineffective-gDNA	DHS_11	enhancer_1	-	0	0	2.64249	0
-	chr6	30591348	CCCTGGCCTCACAGACTTGCCCA	GCCCTGGCCTCACAGACTTGC	ineffective-gDNA	DHS_11	enhancer_1	-	396	606	589.226	0.672068
-	chr6	30591349	CCTGGCCTCACAGACTTGCCCAG	GCCTGGCCTCACAGACTTGCC	ineffective-gDNA	DHS_11	enhancer_1	-	4914	5923	7121.04	0.690067
+	chr6	30591350	CTGGCCTCACAGACTTGCCCAGG	GCTGGCCTCACAGACTTGCCC	regulatory-gDNA sequences	DHS_11	enhancer_1	-	821	535	521.022	1.57575
-	chr6	30591367	CCCAGGGGGGTAAATTCTCAGTG	GCCCAGGGGGGTAAATTCTCA	ineffective-gDNA	DHS_11	enhancer_1	-	0	0	2.64249	0
+	chr6	30591376	GTAAATTCTCAGTGGCTCAGTGG	GTAAATTCTCAGTGGCTCAG	regulatory-gDNA sequences	DHS_11	enhancer_1	-	0	0	2.64249	0
+	chr6	30591399	CACGTGCCTCACGTCCTCACCGG	GCACGTGCCTCACGTCCTCAC	regulatory-gDNA sequences	DHS_11	enhancer_1	-	5	14	19.4187	0.257484
-	chr6	30591405	CCTCACGTCCTCACCGGCAGCCT	GCCTCACGTCCTCACCGGCAG	ineffective-gDNA	DHS_11	enhancer_1	-	27	39	47.6981	0.566061
-	chr6	30591413	CCTCACCGGCAGCCTAGATAGAT	GCCTCACCGGCAGCCTAGATA	ineffective-gDNA	DHS_11	enhancer_1	-	0	0	2.64249	0
-	chr6	30591418	CCGGCAGCCTAGATAGATAGATA	GCCGGCAGCCTAGATAGATAG	ineffective-gDNA	DHS_11	enhancer_1	-	0	0	2.64249	0
-	chr6	30591859	CCGTGCGAAAGGCTGTTTGAGAT	GCCGTGCGAAAGGCTGTTTGA	ineffective-gDNA	DHS_12	-	-	0	0	2.64249	0
+	chr6	30591886	CGCAACAACTTCTCCCGCTCAGG	GCGCAACAACTTCTCCCGCTC	regulatory-gDNA sequences	DHS_12	-	-	0	0	2.64249	0
-	chr6	30591899	CCCGCTCAGGTTACCCTCAGAAA	GCCCGCTCAGGTTACCCTCAG	ineffective-gDNA	DHS_12	-	-	0	0	2.64249	0
-	chr6	30591900	CCGCTCAGGTTACCCTCAGAAAG	GCCGCTCAGGTTACCCTCAGA	ineffective-gDNA	DHS_12	-	-	0	0	2.64249	0
+	chr6	30591907	GGTTACCCTCAGAAAGGCTATGG	GGTTACCCTCAGAAAGGCTA	regulatory-gDNA sequences	DHS_12	-	-	0	0	2.64249	0
-	chr6	30591912	CCCTCAGAAAGGCTATGGACCCC	GCCCTCAGAAAGGCTATGGAC	ineffective-gDNA	DHS_12	-	-	0	0	2.64249	0
-	chr6	30591913	CCTCAGAAAGGCTATGGACCCCG	GCCTCAGAAAGGCTATGGACC	ineffective-gDNA	DHS_12	-	-	11	22	28.6982	0.383299
+	chr6	30591914	CTCAGAAAGGCTATGGACCCCGG	GCTCAGAAAGGCTATGGACCC	regulatory-gDNA sequences	DHS_12	-	-	96	147	157.265	0.610435
-	chr6	30591931	CCCCGGACTCCGCCCCAGATTGC	GCCCCGGACTCCGCCCCAGAT	ineffective-gDNA	DHS_12	-	-	19	40	48.7715	0.389572
-	chr6	30591932	CCCGGACTCCGCCCCAGATTGCA	GCCCGGACTCCGCCCCAGATT	ineffective-gDNA	DHS_12	-	-	123	154	164.575	0.747382
-	chr6	30591933	CCGGACTCCGCCCCAGATTGCAT	GCCGGACTCCGCCCCAGATTG	ineffective-gDNA	DHS_12	-	-	237	419	416.25	0.569369
-	chr6	30591940	CCGCCCCAGATTGCATAACAACT	GCCGCCCCAGATTGCATAACA	ineffective-gDNA	DHS_12	-	-	32	23	29.8458	1.07218
-	chr6	30591943	CCCCAGATTGCATAACAACTGAG	GCCCCAGATTGCATAACAACT	ineffective-gDNA	DHS_12	-	-	0	0	2.64249	0
+	chr6	30591944	CCCAGATTGCATAACAACTGAGG	GCCCAGATTGCATAACAACTG	regulatory-gDNA sequences	DHS_12	-	-	0	0	2.64249	0
+	chr6	30591945	CCAGATTGCATAACAACTGAGGG	GCCAGATTGCATAACAACTGA	regulatory-gDNA sequences	DHS_12	-	-	0	0	2.64249	0
+	chr6	30591946	CAGATTGCATAACAACTGAGGGG	GCAGATTGCATAACAACTGAG	regulatory-gDNA sequences	DHS_12	-	-	0	0	2.64249	0
+	chr6	30591949	ATTGCATAACAACTGAGGGGTGG	GATTGCATAACAACTGAGGGG	regulatory-gDNA sequences	DHS_12	-	-	68	53	62.347	1.09067
+	chr6	30591950	TTGCATAACAACTGAGGGGTGGG	GTTGCATAACAACTGAGGGGT	regulatory-gDNA sequences	DHS_12	-	-	14	50	59.27	0.236207
+	chr6	30591968	GTGGGTCCCTATTTCCTCTCTGG	GTGGGTCCCTATTTCCTCTC	regulatory-gDNA sequences	DHS_12	-	-	26	43	51.9644	0.500343
+	chr6	30591969	TGGGTCCCTATTTCCTCTCTGGG	GTGGGTCCCTATTTCCTCTCT	regulatory-gDNA sequences	DHS_12	-	-	0	0	2.64249	0
-	chr6	30591982	CCTCTCTGGGATCTGTAGCCAAT	GCCTCTCTGGGATCTGTAGCC	ineffective-gDNA	DHS_12	-	-	1152	875	904.84	1.27315
+	chr6	30591993	TCTGTAGCCAATCATTCACGAGG	GTCTGTAGCCAATCATTCACG	regulatory-gDNA sequences	DHS_12	-	-	0	0	2.64249	0
-	chr6	30592000	CCAATCATTCACGAGGTAAACAG	GCCAATCATTCACGAGGTAAA	ineffective-gDNA	DHS_12	-	-	0	0	2.64249	0
-	chr6	30592028	CCGAGTTTCTCTCAGCCGAGAAC	GCCGAGTTTCTCTCAGCCGAG	ineffective-gDNA	DHS_12	-	-	9	28	35.5494	0.253169
+	chr6	30592112	GGGCGACCCCTGAAGCGTAG	GGGCGACCCCTGAAGCGTAG	control-gDNA sequences	-	-	-	32	27	34.4129	0.929883
+	chr6	30592119	CCCTGAAGCGTAGAGGAACC	GCCCTGAAGCGTAGAGGAACC	control-gDNA sequences	-	-	-	0	0	2.64249	0
+	chr6	30592278	GCGGCTCTGTCCCTGTTTCCTGG	GCGGCTCTGTCCCTGTTTCC	regulatory-gDNA sequences	DHS_13	-	-	4420	7457	8926.69	0.495145
+	chr6	30592283	TCTGTCCCTGTTTCCTGGATAGG	GTCTGTCCCTGTTTCCTGGAT	regulatory-gDNA sequences	DHS_13	-	-	33	68	77.38	0.426467
-	chr6	30592288	CCCTGTTTCCTGGATAGGAGACT	GCCCTGTTTCCTGGATAGGAG	ineffective-gDNA	DHS_13	-	-	0	0	2.64249	0
-	chr6	30592289	CCTGTTTCCTGGATAGGAGACTA	GCCTGTTTCCTGGATAGGAGA	ineffective-gDNA	DHS_13	-	-	0	0	2.64249	0
-	chr6	30592296	CCTGGATAGGAGACTACGTCTGT	GCCTGGATAGGAGACTACGTC	ineffective-gDNA	DHS_13	-	-	110	102	110.993	0.991056
+	chr6	30592311	ACGTCTGTATCTTGTATCACAGG	GACGTCTGTATCTTGTATCAC	regulatory-gDNA sequences	DHS_13	-	-	7	19	25.2399	0.277338
+	chr6	30592314	TCTGTATCTTGTATCACAGGAGG	GTCTGTATCTTGTATCACAGG	regulatory-gDNA sequences	DHS_13	-	-	0	0	2.64249	0
+	chr6	30592335	GGCACCTTCTTCCTGTTTCCTGG	GGCACCTTCTTCCTGTTTCC	regulatory-gDNA sequences	DHS_13	-	-	2631	2945	3507.02	0.750209
-	chr6	30592346	CCTGTTTCCTGGCACAGACTTGT	GCCTGTTTCCTGGCACAGACT	ineffective-gDNA	DHS_13	-	-	0	6	9.92841	0
-	chr6	30592353	CCTGGCACAGACTTGTAAGTGAA	GCCTGGCACAGACTTGTAAGT	ineffective-gDNA	DHS_13	-	-	0	26	33.2744	0
-	chr6	30592379	CCTGCCCGCCTCCGCCCACAGCG	GCCTGCCCGCCTCCGCCCACA	ineffective-gDNA	DHS_13	-	-	217	504	492.46	0.440645
-	chr6	30592383	CCCGCCTCCGCCCACAGCGTAAG	GCCCGCCTCCGCCCACAGCGT	ineffective-gDNA	DHS_13	-	-	107	142	152.054	0.703699
-	chr6	30592384	CCGCCTCCGCCCACAGCGTAAGC	GCCGCCTCCGCCCACAGCGTA	ineffective-gDNA	DHS_13	-	-	435	325	332.323	1.30897
-	chr6	30592387	CCTCCGCCCACAGCGTAAGCCGC	GCCTCCGCCCACAGCGTAAGC	ineffective-gDNA	DHS_13	-	-	0	0	2.64249	0
-	chr6	30592390	CCGCCCACAGCGTAAGCCGCGCT	GCCGCCCACAGCGTAAGCCGC	ineffective-gDNA	DHS_13	-	-	0	0	2.64249	0
+	chr6	30592392	GCCCACAGCGTAAGCCGCGCTGG	GCCCACAGCGTAAGCCGCGC	regulatory-gDNA sequences	DHS_13	-	-	0	5	8.72483	0
-	chr6	30592393	CCCACAGCGTAAGCCGCGCTGGA	GCCCACAGCGTAAGCCGCGCT	ineffective-gDNA	DHS_13	-	-	134	203	215.596	0.621534
-	chr6	30592394	CCACAGCGTAAGCCGCGCTGGAA	GCCACAGCGTAAGCCGCGCTG	ineffective-gDNA	DHS_13	-	-	448	495	484.27	0.925105
-	chr6	30592406	CCGCGCTGGAACAGCTCACTTAT	GCCGCGCTGGAACAGCTCACT	ineffective-gDNA	DHS_13	-	-	0	0	2.64249	0
-	chr6	30592431	CCCCAGATGTATGTGGAGTAACC	GCCCCAGATGTATGTGGAGTA	ineffective-gDNA	DHS_13	-	-	54	126	135.466	0.398623
-	chr6	30592432	CCCAGATGTATGTGGAGTAACCG	GCCCAGATGTATGTGGAGTAA	ineffective-gDNA	DHS_13	-	-	0	0	2.64249	0
-	chr6	30592433	CCAGATGTATGTGGAGTAACCGC	GCCAGATGTATGTGGAGTAAC	ineffective-gDNA	DHS_13	-	-	100	195	207.339	0.482301
+	chr6	30592447	AGTAACCGCCTTCAGTTTCCTGG	GAGTAACCGCCTTCAGTTTCC	regulatory-gDNA sequences	DHS_13	-	-	1671	3100	3698.82	0.451766
+	chr6	30595216	AGTGGGGATCACGTGCGTAG	GAGTGGGGATCACGTGCGTAG	control-gDNA sequences	-	-	-	6	41	49.8403	0.120385
-	chr6	30604074	GCGATTAGTCCCCACTTCTC	GCGATTAGTCCCCACTTCTC	control-gDNA sequences	-	-	-	0	0	2.64249	0
+	chr6	30605014	CATAACCCCTGTTGAGGTCC	GCATAACCCCTGTTGAGGTCC	control-gDNA sequences	-	-	-	2016	2130	2491.62	0.809111
-	chr6	30608194	CCCGGCCCATCCCACCGCCTTGC	GCCCGGCCCATCCCACCGCCT	ineffective-gDNA	CTCF_6	-	-	322	251	263.6	1.22155
-	chr6	30608200	CCATCCCACCGCCTTGCTGTGGC	GCCATCCCACCGCCTTGCTGT	ineffective-gDNA	CTCF_6	-	-	77	250	262.636	0.293181
+	chr6	30608203	TCCCACCGCCTTGCTGTGGCAGG	GTCCCACCGCCTTGCTGTGGC	regulatory-gDNA sequences	CTCF_6	-	-	899	800	809.105	1.1111
+	chr6	30608204	CCCACCGCCTTGCTGTGGCAGGG	GCCCACCGCCTTGCTGTGGCA	regulatory-gDNA sequences	CTCF_6	-	-	75	161	171.894	0.436316
-	chr6	30608205	CCACCGCCTTGCTGTGGCAGGGA	GCCACCGCCTTGCTGTGGCAG	ineffective-gDNA	CTCF_6	-	-	127	298	307.668	0.412783
-	chr6	30608208	CCGCCTTGCTGTGGCAGGGAGAG	GCCGCCTTGCTGTGGCAGGGA	ineffective-gDNA	CTCF_6	-	-	158	81	90.1603	1.75243
-	chr6	30608263	CCAATCCCATTATGCCCCCATGA	GCCAATCCCATTATGCCCCCA	ineffective-gDNA	CTCF_6	-	-	100	149	159.352	0.627542
-	chr6	30608268	CCCATTATGCCCCCATGACTTTA	GCCCATTATGCCCCCATGACT	ineffective-gDNA	CTCF_6	-	-	0	0	2.64249	0
-	chr6	30608269	CCATTATGCCCCCATGACTTTAT	GCCATTATGCCCCCATGACTT	ineffective-gDNA	CTCF_6	-	-	21	36	44.4487	0.472455
-	chr6	30608278	CCCCATGACTTTATCCAAACCTC	GCCCCATGACTTTATCCAAAC	ineffective-gDNA	CTCF_6	-	-	0	0	2.64249	0
-	chr6	30608279	CCCATGACTTTATCCAAACCTCA	GCCCATGACTTTATCCAAACC	ineffective-gDNA	CTCF_6	-	-	37	87	96.0588	0.385181
-	chr6	30608280	CCATGACTTTATCCAAACCTCAT	GCCATGACTTTATCCAAACCT	ineffective-gDNA	CTCF_6	-	-	0	0	2.64249	0
+	chr6	30608291	TCCAAACCTCATTATAGCCCAGG	GTCCAAACCTCATTATAGCCC	regulatory-gDNA sequences	CTCF_6	-	-	1	1	3.86787	0.25854
-	chr6	30608292	CCAAACCTCATTATAGCCCAGGC	GCCAAACCTCATTATAGCCCA	ineffective-gDNA	CTCF_6	-	-	0	0	2.64249	0
-	chr6	30608297	CCTCATTATAGCCCAGGCCCCAC	GCCTCATTATAGCCCAGGCCC	ineffective-gDNA	CTCF_6	-	-	647	785	789.945	0.819044
-	chr6	30608420	CCCTCTAGTGTGCAAAAAAGTAA	GCCCTCTAGTGTGCAAAAAAG	ineffective-gDNA	CTCF_6	-	-	0	0	2.64249	0
-	chr6	30608421	CCTCTAGTGTGCAAAAAAGTAAG	GCCTCTAGTGTGCAAAAAAGT	ineffective-gDNA	CTCF_6	-	-	0	0	2.64249	0
+	chr6	30608436	AAAGTAAGTACAAGAATTTTTGG	GAAAGTAAGTACAAGAATTTT	regulatory-gDNA sequences	CTCF_6	-	-	0	0	2.64249	0
+	chr6	30608437	AAGTAAGTACAAGAATTTTTGGG	GAAGTAAGTACAAGAATTTTT	regulatory-gDNA sequences	CTCF_6	-	-	0	0	2.64249	0
+	chr6	30608438	AGTAAGTACAAGAATTTTTGGGG	GAGTAAGTACAAGAATTTTTG	regulatory-gDNA sequences	CTCF_6	-	-	0	0	2.64249	0
-	chr6	30608523	CCAGGCATGGTACAGTAGCATAA	GCCAGGCATGGTACAGTAGCA	ineffective-gDNA	CTCF_6	-	-	0	5	8.72483	0
+	chr6	30609398	GACGTGATTGGCGGCATTTT	GACGTGATTGGCGGCATTTT	control-gDNA sequences	-	-	-	1115	2098	2451.52	0.45482
+	chr6	30617281	GTAGCAACTCCATGATTCCAAGG	GTAGCAACTCCATGATTCCA	regulatory-gDNA sequences	CTCF_7	DHS_14	-	0	0	2.64249	0
+	chr6	30617294	GATTCCAAGGTAATTTAAACAGG	GATTCCAAGGTAATTTAAAC	regulatory-gDNA sequences	CTCF_7	DHS_14	-	0	0	2.64249	0
-	chr6	30617354	CCTCTCAGCCTGCAGTGATGCTA	GCCTCTCAGCCTGCAGTGATG	ineffective-gDNA	CTCF_7	DHS_14	-	26193	32992	35076.2	0.746746
-	chr6	30617362	CCTGCAGTGATGCTACGACACCG	GCCTGCAGTGATGCTACGACA	ineffective-gDNA	CTCF_7	DHS_14	-	0	0	2.64249	0
+	chr6	30617363	CTGCAGTGATGCTACGACACCGG	GCTGCAGTGATGCTACGACAC	regulatory-gDNA sequences	CTCF_7	DHS_14	-	6	28	35.5494	0.168779
+	chr6	30617370	GATGCTACGACACCGGCAGATGG	GATGCTACGACACCGGCAGA	regulatory-gDNA sequences	CTCF_7	DHS_14	-	203	223	235.973	0.860268
-	chr6	30617382	CCGGCAGATGGCGCTGCAAAGCT	GCCGGCAGATGGCGCTGCAAA	ineffective-gDNA	CTCF_7	DHS_14	-	0	0	2.64249	0
+	chr6	30617397	GCAAAGCTTCTCAAATGCAGCGG	GCAAAGCTTCTCAAATGCAG	regulatory-gDNA sequences	CTCF_7	DHS_14	-	0	0	2.64249	0
+	chr6	30617398	CAAAGCTTCTCAAATGCAGCGGG	GCAAAGCTTCTCAAATGCAGC	regulatory-gDNA sequences	CTCF_7	DHS_14	-	0	0	2.64249	0
+	chr6	30617416	GCGGGAAGTCCATTTACCAACGG	GCGGGAAGTCCATTTACCAA	regulatory-gDNA sequences	CTCF_7	DHS_14	-	0	0	2.64249	0
-	chr6	30617425	CCATTTACCAACGGCTGTTGCGA	GCCATTTACCAACGGCTGTTG	ineffective-gDNA	CTCF_7	DHS_14	-	1222	905	943.106	1.29572
-	chr6	30617432	CCAACGGCTGTTGCGATCTCTTA	GCCAACGGCTGTTGCGATCTC	ineffective-gDNA	CTCF_7	DHS_14	-	247	553	537.903	0.459191
-	chr6	30617562	CCGTATCAGTGCGAACCAGCTGA	GCCGTATCAGTGCGAACCAGC	ineffective-gDNA	DHS_15	-	-	0	0	2.64249	0
-	chr6	30617577	CCAGCTGAATGTCAGCGCTGTTC	GCCAGCTGAATGTCAGCGCTG	ineffective-gDNA	DHS_15	-	-	403	395	394.955	1.02037
-	chr6	30617599	CCCTCCTGTGACAGAAGCCACCG	GCCCTCCTGTGACAGAAGCCA	ineffective-gDNA	DHS_15	-	-	70	141	151.013	0.463537
-	chr6	30617600	CCTCCTGTGACAGAAGCCACCGG	GCCTCCTGTGACAGAAGCCAC	ineffective-gDNA	DHS_15	-	-	21	37	45.5368	0.461166
+	chr6	30617614	AGCCACCGGCGCCTGCCTGAGGG	GAGCCACCGGCGCCTGCCTGA	regulatory-gDNA sequences	DHS_15	-	-	9	21	27.5481	0.326702
-	chr6	30617616	CCACCGGCGCCTGCCTGAGGGCA	GCCACCGGCGCCTGCCTGAGG	ineffective-gDNA	DHS_15	-	-	60	146	156.222	0.384069
-	chr6	30617619	CCGGCGCCTGCCTGAGGGCACTC	GCCGGCGCCTGCCTGAGGGCA	ineffective-gDNA	DHS_15	-	-	0	0	2.64249	0
-	chr6	30617625	CCTGCCTGAGGGCACTCCCCTCA	GCCTGCCTGAGGGCACTCCCC	ineffective-gDNA	DHS_15	-	-	307	710	699.579	0.438835
-	chr6	30617641	CCCCTCACTGGGACTCTCAGTAC	GCCCCTCACTGGGACTCTCAG	ineffective-gDNA	DHS_15	-	-	0	0	2.64249	0
-	chr6	30617642	CCCTCACTGGGACTCTCAGTACC	GCCCTCACTGGGACTCTCAGT	ineffective-gDNA	DHS_15	-	-	121	244	256.813	0.471159
-	chr6	30617643	CCTCACTGGGACTCTCAGTACCA	GCCTCACTGGGACTCTCAGTA	ineffective-gDNA	DHS_15	-	-	0	0	2.64249	0
-	chr6	30617663	CCACGCCCACCTGTCCCCAAGGT	GCCACGCCCACCTGTCCCCAA	ineffective-gDNA	DHS_15	-	-	2137	185	196.959	10.85
-	chr6	30617668	CCCACCTGTCCCCAAGGTTTGTT	GCCCACCTGTCCCCAAGGTTT	ineffective-gDNA	DHS_15	-	-	463	699	687.166	0.673782
-	chr6	30617669	CCACCTGTCCCCAAGGTTTGTTT	GCCACCTGTCCCCAAGGTTTG	ineffective-gDNA	DHS_15	-	-	2863	4332	5208.66	0.549662
-	chr6	30617672	CCTGTCCCCAAGGTTTGTTTCAT	GCCTGTCCCCAAGGTTTGTTT	ineffective-gDNA	DHS_15	-	-	10	21	27.5481	0.363002
-	chr6	30617677	CCCCAAGGTTTGTTTCATCACTA	GCCCCAAGGTTTGTTTCATCA	ineffective-gDNA	DHS_15	-	-	0	0	2.64249	0
-	chr6	30617678	CCCAAGGTTTGTTTCATCACTAA	GCCCAAGGTTTGTTTCATCAC	ineffective-gDNA	DHS_15	-	-	0	12	17.0678	0
-	chr6	30617679	CCAAGGTTTGTTTCATCACTAAG	GCCAAGGTTTGTTTCATCACT	ineffective-gDNA	DHS_15	-	-	0	0	2.64249	0
-	chr6	30617704	CCACCTTCCAGCATTTTCACCTT	GCCACCTTCCAGCATTTTCAC	ineffective-gDNA	DHS_15	-	-	51	187	199.039	0.256231
-	chr6	30618020	CCCATCAGCAGCGTTCCACGCCG	GCCCATCAGCAGCGTTCCACG	ineffective-gDNA	DHS_16	-	-	270	447	441.143	0.612047
-	chr6	30618021	CCATCAGCAGCGTTCCACGCCGC	GCCATCAGCAGCGTTCCACGC	ineffective-gDNA	DHS_16	-	-	0	0	2.64249	0
-	chr6	30618060	CCTCCCCTAGCTTCATCACACCA	GCCTCCCCTAGCTTCATCACA	ineffective-gDNA	DHS_16	-	-	0	0	2.64249	0
-	chr6	30618064	CCCTAGCTTCATCACACCACGTT	GCCCTAGCTTCATCACACCAC	ineffective-gDNA	DHS_16	-	-	0	0	2.64249	0
-	chr6	30618065	CCTAGCTTCATCACACCACGTTA	GCCTAGCTTCATCACACCACG	ineffective-gDNA	DHS_16	-	-	23	40	48.7715	0.471587
+	chr6	30618070	CTTCATCACACCACGTTACTAGG	GCTTCATCACACCACGTTACT	regulatory-gDNA sequences	DHS_16	-	-	0	0	2.64249	0
-	chr6	30618080	CCACGTTACTAGGTTTTTCCTGT	GCCACGTTACTAGGTTTTTCC	ineffective-gDNA	DHS_16	-	-	56	91	100.009	0.559947
-	chr6	30618153	CCTCAGCCTTCTCTGCTCCCCAC	GCCTCAGCCTTCTCTGCTCCC	ineffective-gDNA	DHS_16	-	-	400	785	789.945	0.506364
-	chr6	30618170	CCCCACACCTATATGTTGATGAT	GCCCCACACCTATATGTTGAT	ineffective-gDNA	DHS_16	-	-	19	25	32.1338	0.591278
-	chr6	30618171	CCCACACCTATATGTTGATGATG	GCCCACACCTATATGTTGATG	ineffective-gDNA	DHS_16	-	-	162	324	331.417	0.488811
-	chr6	30618172	CCACACCTATATGTTGATGATGC	GCCACACCTATATGTTGATGA	ineffective-gDNA	DHS_16	-	-	0	0	2.64249	0
+	chr6	30619739	GGGTGCGTATTTCAGCGTGG	GGGTGCGTATTTCAGCGTGG	control-gDNA sequences	-	-	-	163	348	353.058	0.46168
+	chr6	30619740	GGTGCGTATTTCAGCGTGGA	GGTGCGTATTTCAGCGTGGA	control-gDNA sequences	-	-	-	16	48	57.2017	0.279712
-	chr6	30620464	CCAAACACCTTAGCCTCTTTAAA	GCCAAACACCTTAGCCTCTTT	ineffective-gDNA	CTCF_8	DHS_17	-	42	95	103.983	0.403912
-	chr6	30620471	CCTTAGCCTCTTTAAATATACTT	GCCTTAGCCTCTTTAAATATA	ineffective-gDNA	CTCF_8	DHS_17	-	0	0	2.64249	0
+	chr6	30620494	TCCTTTGCTCCTTGGTTAACAGG	GTCCTTTGCTCCTTGGTTAAC	regulatory-gDNA sequences	CTCF_8	DHS_17	-	0	0	2.64249	0
-	chr6	30620495	CCTTTGCTCCTTGGTTAACAGGG	GCCTTTGCTCCTTGGTTAACA	ineffective-gDNA	CTCF_8	DHS_17	-	0	0	2.64249	0
-	chr6	30620503	CCTTGGTTAACAGGGTCTGTCTG	GCCTTGGTTAACAGGGTCTGT	ineffective-gDNA	CTCF_8	DHS_17	-	27	45	54.0713	0.49934
-	chr6	30620544	CCCAGTGACTCAGATCCTGAAAG	GCCCAGTGACTCAGATCCTGA	ineffective-gDNA	CTCF_8	DHS_17	-	0	0	2.64249	0
+	chr6	30620545	CCAGTGACTCAGATCCTGAAAGG	GCCAGTGACTCAGATCCTGAA	regulatory-gDNA sequences	CTCF_8	DHS_17	-	0	0	2.64249	0
-	chr6	30620607	CCATCTAGTGGGCAACCTGTCCA	GCCATCTAGTGGGCAACCTGT	ineffective-gDNA	CTCF_8	DHS_17	-	107	139	148.932	0.718448
-	chr6	30620622	CCTGTCCAACTACACTTTTTGCT	GCCTGTCCAACTACACTTTTT	ineffective-gDNA	CTCF_8	DHS_17	-	0	0	2.64249	0
-	chr6	30620627	CCAACTACACTTTTTGCTATCAT	GCCAACTACACTTTTTGCTAT	ineffective-gDNA	CTCF_8	DHS_17	-	15	49	58.2377	0.257565
+	chr6	30620646	TCATCCAATACAGACAACACTGG	GTCATCCAATACAGACAACAC	regulatory-gDNA sequences	CTCF_8	DHS_17	-	0	0	2.64249	0
-	chr6	30621510	ATCCCGTTATCTACATGGGG	GATCCCGTTATCTACATGGGG	control-gDNA sequences	-	-	-	89	185	196.959	0.451872
+	chr6	30621853	CATAAGGGTTTCGGCCAGCC	GCATAAGGGTTTCGGCCAGCC	control-gDNA sequences	-	-	-	16	42	50.9045	0.314314
+	chr6	30622406	CCTACGCTATAGCAGGGGGC	GCCTACGCTATAGCAGGGGGC	control-gDNA sequences	-	-	-	1036	1816	2097.28	0.493974
+	chr6	30622407	CTACGCTATAGCAGGGGGCT	GCTACGCTATAGCAGGGGGCT	control-gDNA sequences	-	-	-	1695	1285	1426.37	1.18833
+	chr6	30622539	CACATCATTCCGAGCCGCCT	GCACATCATTCCGAGCCGCCT	control-gDNA sequences	-	-	-	5221	5920	7117.48	0.733546
-	chr6	30623244	CTCGCTGATCAATGGGCTGG	GCTCGCTGATCAATGGGCTGG	control-gDNA sequences	-	-	-	140	313	321.413	0.435577
-	chr6	30628219	GACCATCGGCTGTGTGGGTA	GACCATCGGCTGTGTGGGTA	control-gDNA sequences	-	-	-	105	125	134.435	0.781045
+	chr6	30629295	TGGCGGGAAATTCACAACCT	GTGGCGGGAAATTCACAACCT	control-gDNA sequences	-	-	-	0	0	2.64249	0
-	chr6	30630190	TAGTGCTGATGTCCGCAGTT	GTAGTGCTGATGTCCGCAGTT	control-gDNA sequences	-	-	-	2068	886	918.873	2.25058
+	chr6	30630637	TAGCTCCAAGGAGGACGTCG	GTAGCTCCAAGGAGGACGTCG	control-gDNA sequences	-	-	-	147	235	247.964	0.592829
+	chr6	30631263	TCCGGGTAGGCGGGAAAGCC	GTCCGGGTAGGCGGGAAAGCC	control-gDNA sequences	-	-	-	0	0	2.64249	0
+	chr6	30631310	CGATTTGGGTCGTAGCCTCG	GCGATTTGGGTCGTAGCCTCG	control-gDNA sequences	-	-	-	2364	1939	2251.96	1.04975
+	chr6	30631328	CGTGGACCCAGCCCCTGAGAAGG	GCGTGGACCCAGCCCCTGAGA	regulatory-gDNA sequences	DHS_18	-	-	0	0	2.64249	0
-	chr6	30631335	CCAGCCCCTGAGAAGGCTGCTGG	GCCAGCCCCTGAGAAGGCTGC	ineffective-gDNA	DHS_18	-	-	143	271	282.569	0.506071
-	chr6	30631339	CCCCTGAGAAGGCTGCTGGTTAA	GCCCCTGAGAAGGCTGCTGGT	ineffective-gDNA	DHS_18	-	-	360	379	380.739	0.945529
-	chr6	30631340	CCCTGAGAAGGCTGCTGGTTAAG	GCCCTGAGAAGGCTGCTGGTT	ineffective-gDNA	DHS_18	-	-	314	518	505.286	0.62143
+	chr6	30631347	AAGGCTGCTGGTTAAGCCTGCGG	GAAGGCTGCTGGTTAAGCCTG	regulatory-gDNA sequences	DHS_18	-	-	38	139	148.932	0.25515
+	chr6	30631356	GGTTAAGCCTGCGGATATGATGG	GGTTAAGCCTGCGGATATGA	regulatory-gDNA sequences	DHS_18	-	-	0	0	2.64249	0
[truncated: 3,546 more rows]

## Sheet: Rep_2 >50 reads >2 fold
strand	chr	start	ref	seq	sgRNA category	Candidate regulatory regions			YD38	YD39	YD38-39.pred	YD38/pred
[truncated: 3,919 more rows]

[truncated: 4 more sheets: Rep_3 >50 reads >2 fold, Rep_4 >50 reads >2 fold, summary, overlap]
